# Supplementary material
Source: Research Square preprint supplement (doi:10.21203/rs.3.rs-10243829/v1)
Supplement: Supplementary file 1 [file 36b65415ba6dc0cfb8b28b22.xlsx]

## Sheet: description
diablo_output_comp1 & diablo_output_comp2
Column	Explanation	Remarks
block:	Omics data block from which the metabolite feature was selected.
comp:	Latent DIABLO component on which the feature contributed.
feature:	Feature identifier as represented in the metabolomics dataset.
timepoint:	Sampling time point at which the feature was measured.
loading:	DIABLO loading value for the feature.
corr_case:	Correlation between the feature and case status or case-related component structure.
direction:	Direction of association with case status (higher in cases or controls).
score:	Composite ranking metric used to prioritize features.
block_label:	Human-readable label for the omics block.
mz:	Mass-to-charge ratio of the metabolite feature.	for metabolome features only
rt:	Retention time of the metabolite feature.	for metabolome features only
mummi_EID:	Mummichog empirical feature identifier.	for metabolome features only; from mummichog
mummi_compounds:	Candidate compound IDs matched by Mummichog.	for metabolome features only; from mummichog
mummi_compound_names:	Candidate compound names assigned by Mummichog.	for metabolome features only; from mummichog
mummi_ion_mode:	Ionization mode used for metabolite detection and annotation.	for metabolome features only; from mummichog
annotation	Final annotation assigned to the metabolite feature, where available.	for metabolome features only; from mummichog

## Sheet: diablo_output_comp1
block	comp	feature	loading	corr_case	direction	score	block_label	mz	rt	mummi_input_row	mummi_EID	mummi_compounds	mummi_compound_names	mummi_ion_mode	mummi_direction	RT	MZ	annotation
stool_scfa	1	Isocaproate	-0.92395	0.30436	Higher in Case	0.281214	Fecal SCFAs	NA	NA	NA	NA	NA	NA	NA	NA	NA	NA	NA
stool_microbiome	1	Prevotella.sp002251385	-0.595879	0.451758	Higher in Case	0.269193	Fecal Microbiome (Taxa)	NA	NA	NA	NA	NA	NA	NA	NA	NA	NA	NA
prot_fecal	1	Q13232	0.613104	-0.336915	Lower in Case	0.206564	Fecal Proteome	NA	NA	NA	NA	NA	NA	NA	NA	NA	NA	NA
met_vams	1	rLC_pos_mtb_8169455	0.426106	-0.479236	Lower in Case	0.204205	VAMS Metabolome	NA	0.562133	row47				positive	down_in_svn	NA	NA	NA
stool_microbiome	1	Prevotella.sp900553155	-0.372694	0.518554	Higher in Case	0.193262	Fecal Microbiome (Taxa)	NA	NA	NA	NA	NA	NA	NA	NA	NA	NA	NA
met_vams	1	rLC_neg_mtb_4522800	0.374827	-0.423315	Lower in Case	0.15867	VAMS Metabolome	734.528	0.407133	row31				negative	down_in_svn	NA	NA	NA
prot_nav	1	Q6PGP7	-0.362991	0.35475	Higher in Case	0.128771	Plasma Proteome (Naive)	NA	NA	NA	NA	NA	NA	NA	NA	NA	NA	NA
prot_dep	1	P04004	-0.34281	0.37443	Higher in Case	0.128358	Plasma Proteome (Depleted)	NA	NA	NA	NA	NA	NA	NA	NA	NA	NA	NA
clinical	1	impr_water	0.515779	-0.234663	Lower in Case	0.121034	Clinical	NA	NA	NA	NA	NA	NA	NA	NA	NA	NA	NA
prot_fecal	1	P06748-2	0.356534	-0.337126	Lower in Case	0.120197	Fecal Proteome	NA	NA	NA	NA	NA	NA	NA	NA	NA	NA	NA
met_vams	1	rLC_neg_mtb_1355756	0.341219	-0.330054	Lower in Case	0.112621	VAMS Metabolome	259.125	0.150867	row6184				negative	down_in_svn	NA	NA	NA
prot_nav	1	O15054	0.337156	-0.32184	Lower in Case	0.10851	Plasma Proteome (Naive)	NA	NA	NA	NA	NA	NA	NA	NA	NA	NA	NA
met_fecal	1	pos_0900	0.275331	-0.39188	Lower in Case	0.107897	Fecal Metabolome	153.033	9.75	row1100				positive	down_in_svn	9.75	153.033	Unknown
met_fecal	1	pos_0321	0.275143	-0.391899	Lower in Case	0.107828	Fecal Metabolome	110.009	9.75	row1105				positive	down_in_svn	9.75	110.009	Unknown
met_fecal	1	pos_0546	0.275051	-0.391899	Lower in Case	0.107792	Fecal Metabolome	128.019	9.76	row2165				positive	down_in_svn	9.76	128.019	Unknown
met_fecal	1	pos_0485	0.275042	-0.391903	Lower in Case	0.10779	Fecal Metabolome	123.04	9.75	row1688				positive	down_in_svn	9.75	123.04	Unknown
met_fecal	1	pos_1133	0.274938	-0.391895	Lower in Case	0.107747	Fecal Metabolome	169.046	9.75	row1812	E1409	C06006	(S)-2-Aceto-2-hydroxybutanoate; (S)-2-Hydroxy-2-ethyl-3-oxobutanoate	positive	down_in_svn	9.75	169.046	Unknown
met_fecal	1	pos_1526	0.274926	-0.391899	Lower in Case	0.107743	Fecal Metabolome	192.062	9.75	row1695	E972	C00547;C00314	Norepinephrine$Pyridoxine	positive	down_in_svn	9.75	192.062	Unknown
met_fecal	1	pos_2703	0.274739	-0.391879	Lower in Case	0.107664	Fecal Metabolome	265.016	9.75	row1820				positive	down_in_svn	9.75	265.016	Unknown
stool_gene	1	3003984	0.277752	-0.369932	Lower in Case	0.102749	Fecal Metagenome (Genes)	NA	NA	NA	NA	NA	NA	NA	NA	NA	NA	NA
stool_gene	1	PL9_2	0.311241	-0.326233	Lower in Case	0.101537	Fecal Metagenome (Genes)	NA	NA	NA	NA	NA	NA	NA	NA	NA	NA	NA
prot_dep	1	Q9NZQ3	0.31382	-0.322121	Lower in Case	0.101088	Plasma Proteome (Depleted)	NA	NA	NA	NA	NA	NA	NA	NA	NA	NA	NA
prot_nav	1	P22352	0.219871	-0.453374	Lower in Case	0.0996836	Plasma Proteome (Naive)	NA	NA	NA	NA	NA	NA	NA	NA	NA	NA	NA
met_vams	1	rLC_neg_mtb_1336782	0.246068	-0.399446	Lower in Case	0.0982909	VAMS Metabolome	525.154	0.128133	row101				negative	down_in_svn	NA	NA	NA
prot_nav	1	Q5T5C0	-0.252918	0.382856	Higher in Case	0.0968309	Plasma Proteome (Naive)	NA	NA	NA	NA	NA	NA	NA	NA	NA	NA	NA
prot_dep	1	Q7Z7A4	0.329578	-0.281275	Lower in Case	0.0927019	Plasma Proteome (Depleted)	NA	NA	NA	NA	NA	NA	NA	NA	NA	NA	NA
met_vams	1	rLC_neg_mtb_237218	0.286969	-0.312877	Lower in Case	0.0897862	VAMS Metabolome	945.117	0.0248	row1013				negative	down_in_svn	NA	NA	NA
met_pla	1	rLC_pos_mtb_3106722	-0.219116	0.407477	Higher in Case	0.0892848	Plasma Metabolome	465.383	0.219067	row86				positive	up_in_svn	NA	NA	NA
met_vams	1	rLC_neg_mtb_788464	0.246793	-0.358246	Lower in Case	0.0884126	VAMS Metabolome	401.048	0.0702667	row2355				negative	down_in_svn	NA	NA	NA
met_fecal	1	pos_1233	-0.226479	0.383443	Higher in Case	0.0868419	Fecal Metabolome	174.124	5.98	row2647				positive	up_in_svn	5.98	174.124	N5-(1-Iminoethyl)-L-ornithine
stool_microbiome	1	CAG.177.sp003514385	-0.267249	0.319493	Higher in Case	0.085384	Fecal Microbiome (Taxa)	NA	NA	NA	NA	NA	NA	NA	NA	NA	NA	NA
stool_microbiome	1	Parabacteroides.distasonis	0.264929	-0.317592	Lower in Case	0.0841393	Fecal Microbiome (Taxa)	NA	NA	NA	NA	NA	NA	NA	NA	NA	NA	NA
prot_dep	1	P22352	0.218035	-0.381016	Lower in Case	0.0830747	Plasma Proteome (Depleted)	NA	NA	NA	NA	NA	NA	NA	NA	NA	NA	NA
met_fecal	1	pos_1715	0.273564	-0.294226	Lower in Case	0.0804897	Fecal Metabolome	204.087	8.02	row2745	E422;E513;E859;E1175	C01136;C16255;C01239;C01074;C00645;C00140;C00268;C02953;C04244	S-Acetyldihydrolipoamide; 6-S-Acetyldihydrolipoamide$[Dihydrolipoyllysine-residue acetyltransferase] S-acetyldihydrolipoyllysine; S-Acetyldihydrolipoamide-E;N-Acetyl-beta-D-glucosaminylamine;N-Acetylgalactosamine; N-Acetylchondrosamine; 2-Acetamido-2-deoxygalactose; GalNAc$N-Acetyl-D-mannosamine; 2-Acetamido-2-deoxy-D-mannose$N-Acetyl-D-glucosamine;6,7-Dihydrobiopterin$7,8-Dihydrobiopterin$6-Lact…	positive	up_in_svn	8.02	204.087	3-(Hydroxymethyl)-6,7-dimethylquinolin-2-ol
stool_gene	1	3004657	0.247666	-0.321396	Lower in Case	0.0795991	Fecal Metagenome (Genes)	NA	NA	NA	NA	NA	NA	NA	NA	NA	NA	NA
prot_nav	1	P82987	0.283778	-0.275784	Lower in Case	0.0782614	Plasma Proteome (Naive)	NA	NA	NA	NA	NA	NA	NA	NA	NA	NA	NA
stool_microbiome	1	UMGS1766.sp900554855	0.250932	-0.306585	Lower in Case	0.0769319	Fecal Microbiome (Taxa)	NA	NA	NA	NA	NA	NA	NA	NA	NA	NA	NA
met_pla	1	rLC_pos_mtb_516420	0.299044	-0.256884	Lower in Case	0.0768198	Plasma Metabolome	250.112	0.0268667	row99				positive	down_in_svn	NA	NA	NA
met_pla	1	rLC_pos_mtb_545178	0.280111	-0.26987	Lower in Case	0.0755935	Plasma Metabolome	308.117	0.0289333	row267				positive	down_in_svn	NA	NA	NA
met_pla	1	rLC_neg_mtb_3735293	0.234162	-0.321904	Lower in Case	0.0753775	Plasma Metabolome	291.014	0.392667	row3598				negative	down_in_svn	NA	NA	NA
met_pla	1	rLC_neg_mtb_1287269	0.233031	-0.305696	Lower in Case	0.0712368	Plasma Metabolome	379.958	0.169467	row2122				negative	down_in_svn	NA	NA	NA
clinical	1	gravidity	0.515424	-0.133808	Lower in Case	0.0689681	Clinical	NA	NA	NA	NA	NA	NA	NA	NA	NA	NA	NA
stool_gene	1	K22550	0.238567	-0.28847	Lower in Case	0.0688195	Fecal Metagenome (Genes)	NA	NA	NA	NA	NA	NA	NA	NA	NA	NA	NA
met_vams	1	rLC_neg_mtb_4562589	0.243906	-0.278241	Lower in Case	0.0678647	VAMS Metabolome	176.059	0.413333	row5564				negative	down_in_svn	NA	NA	NA
prot_dep	1	P00338	0.229388	-0.290309	Lower in Case	0.0665933	Plasma Proteome (Depleted)	NA	NA	NA	NA	NA	NA	NA	NA	NA	NA	NA
met_vams	1	rLC_neg_mtb_3664269	-0.190941	0.342243	Higher in Case	0.0653482	VAMS Metabolome	684.228	0.361667	row8541				negative	up_in_svn	NA	NA	NA
prot_nav	1	P49908	0.147787	-0.424656	Lower in Case	0.0627587	Plasma Proteome (Naive)	NA	NA	NA	NA	NA	NA	NA	NA	NA	NA	NA
stool_gene	1	K20609	0.244056	-0.256496	Lower in Case	0.0625994	Fecal Metagenome (Genes)	NA	NA	NA	NA	NA	NA	NA	NA	NA	NA	NA
stool_gene	1	K02243	0.211999	-0.29372	Lower in Case	0.0622684	Fecal Metagenome (Genes)	NA	NA	NA	NA	NA	NA	NA	NA	NA	NA	NA
stool_microbiome	1	Gemmiger.variabilis_A	0.203306	-0.306067	Lower in Case	0.0622253	Fecal Microbiome (Taxa)	NA	NA	NA	NA	NA	NA	NA	NA	NA	NA	NA
stool_gene	1	K09167	0.227336	-0.271715	Lower in Case	0.0617707	Fecal Metagenome (Genes)	NA	NA	NA	NA	NA	NA	NA	NA	NA	NA	NA
prot_nav	1	Q9HC36	0.198223	-0.305215	Lower in Case	0.0605007	Plasma Proteome (Naive)	NA	NA	NA	NA	NA	NA	NA	NA	NA	NA	NA
met_fecal	1	pos_3110	0.234224	-0.256412	Lower in Case	0.0600577	Fecal Metabolome	290.146	9.63	row2152				positive	down_in_svn	9.63	290.146	Arg-Asp
prot_fecal	1	Q9H8H3	-0.206776	0.286818	Higher in Case	0.059307	Fecal Proteome	NA	NA	NA	NA	NA	NA	NA	NA	NA	NA	NA
stool_scfa	1	Caproate	-0.276814	0.213344	Higher in Case	0.0590565	Fecal SCFAs	NA	NA	NA	NA	NA	NA	NA	NA	NA	NA	NA
prot_nav	1	Q13568	0.236749	-0.24862	Lower in Case	0.0588607	Plasma Proteome (Naive)	NA	NA	NA	NA	NA	NA	NA	NA	NA	NA	NA
prot_dep	1	Q15485	0.184093	-0.318103	Lower in Case	0.0585604	Plasma Proteome (Depleted)	NA	NA	NA	NA	NA	NA	NA	NA	NA	NA	NA
stool_microbiome	1	Succinivibrio.sp000431835	-0.183816	0.313652	Higher in Case	0.0576542	Fecal Microbiome (Taxa)	NA	NA	NA	NA	NA	NA	NA	NA	NA	NA	NA
prot_dep	1	P33316	0.196751	-0.291213	Lower in Case	0.0572964	Plasma Proteome (Depleted)	NA	NA	NA	NA	NA	NA	NA	NA	NA	NA	NA
prot_dep	1	Q08380	-0.175143	0.325237	Higher in Case	0.0569629	Plasma Proteome (Depleted)	NA	NA	NA	NA	NA	NA	NA	NA	NA	NA	NA
met_fecal	1	pos_1248	0.181809	-0.307358	Lower in Case	0.0558804	Fecal Metabolome	175.144	8.74	row874	E234	C05545	Histone N6,N6-dimethyl-L-lysine	positive	down_in_svn	8.74	175.144	N6,N6-dimethyllysine
stool_gene	1	K11003	-0.153265	0.357465	Higher in Case	0.0547868	Fecal Metagenome (Genes)	NA	NA	NA	NA	NA	NA	NA	NA	NA	NA	NA
prot_fecal	1	P62269	0.224257	-0.242588	Lower in Case	0.0544019	Fecal Proteome	NA	NA	NA	NA	NA	NA	NA	NA	NA	NA	NA
stool_microbiome	1	Holdemanella.sp003436425	-0.176308	0.305421	Higher in Case	0.0538481	Fecal Microbiome (Taxa)	NA	NA	NA	NA	NA	NA	NA	NA	NA	NA	NA
stool_microbiome	1	Unknown_Prevotella.8	-0.140815	0.381217	Higher in Case	0.053681	Fecal Microbiome (Taxa)	NA	NA	NA	NA	NA	NA	NA	NA	NA	NA	NA
met_fecal	1	pos_0408	-0.218184	0.242631	Higher in Case	0.0529381	Fecal Metabolome	116.071	7.56	row647	E313;E365;E1312	C05548;CE4788;C00763;C00148;C00077;C00515;C01602	6-Acetamido-2-oxohexanoate; 2-Oxo-6-acetamidocaproate;acetamidopropanal$D-Proline$L-Proline;Ornithine$D-Ornithine$Ornithine; 2,5-Diaminovaleric acid; 2,5-Diaminopentanoic acid; 2,5-Diaminopentanoate	positive	up_in_svn	7.56	116.071	Proline
prot_nav	1	P48634	0.226786	-0.229526	Lower in Case	0.0520533	Plasma Proteome (Naive)	NA	NA	NA	NA	NA	NA	NA	NA	NA	NA	NA
met_pla	1	rLC_pos_mtb_407028	0.201437	-0.257661	Lower in Case	0.0519026	Plasma Metabolome	1305.18	0.0206667	row199				positive	down_in_svn	NA	NA	NA
stool_microbiome	1	Agathobaculum.sp003481705	0.200305	-0.256429	Lower in Case	0.051364	Fecal Microbiome (Taxa)	NA	NA	NA	NA	NA	NA	NA	NA	NA	NA	NA
stool_gene	1	GH30_0	0.202171	-0.253441	Lower in Case	0.0512384	Fecal Metagenome (Genes)	NA	NA	NA	NA	NA	NA	NA	NA	NA	NA	NA
prot_nav	1	O14733	-0.171983	0.296246	Higher in Case	0.0509493	Plasma Proteome (Naive)	NA	NA	NA	NA	NA	NA	NA	NA	NA	NA	NA
prot_fecal	1	A0A0A0MS14	-0.191444	0.263246	Higher in Case	0.0503968	Fecal Proteome	NA	NA	NA	NA	NA	NA	NA	NA	NA	NA	NA
prot_dep	1	P30038	0.223552	-0.224597	Lower in Case	0.0502091	Plasma Proteome (Depleted)	NA	NA	NA	NA	NA	NA	NA	NA	NA	NA	NA
prot_dep	1	Q9P0W8	0.195825	-0.255455	Lower in Case	0.0500245	Plasma Proteome (Depleted)	NA	NA	NA	NA	NA	NA	NA	NA	NA	NA	NA
clinical	1	w_age	0.313684	-0.159327	Lower in Case	0.0499783	Clinical	NA	NA	NA	NA	NA	NA	NA	NA	NA	NA	NA
prot_fecal	1	P30536	0.209439	-0.236856	Lower in Case	0.0496068	Fecal Proteome	NA	NA	NA	NA	NA	NA	NA	NA	NA	NA	NA
prot_fecal	1	P11310-2	-0.205863	0.240581	Higher in Case	0.0495267	Fecal Proteome	NA	NA	NA	NA	NA	NA	NA	NA	NA	NA	NA
met_vams	1	rLC_neg_mtb_1356305	-0.157231	0.311564	Higher in Case	0.0489874	VAMS Metabolome	314.074	0.1426	row5743				negative	down_in_svn	NA	NA	NA
met_pla	1	rLC_neg_mtb_4044811	-0.213632	0.228848	Higher in Case	0.0488892	Plasma Metabolome	262.037	0.467067	row471				negative	up_in_svn	NA	NA	NA
stool_gene	1	3004780	-0.216965	0.224261	Higher in Case	0.0486567	Fecal Metagenome (Genes)	NA	NA	NA	NA	NA	NA	NA	NA	NA	NA	NA
prot_nav	1	Q9Y6V0	0.168884	-0.283788	Lower in Case	0.0479272	Plasma Proteome (Naive)	NA	NA	NA	NA	NA	NA	NA	NA	NA	NA	NA
met_pla	1	rLC_pos_mtb_185333	0.213712	-0.223808	Lower in Case	0.0478306	Plasma Metabolome	249.109	0.0268667	row356				positive	down_in_svn	NA	NA	NA
clinical	1	m_muacincl	0.346714	-0.137524	Lower in Case	0.0476816	Clinical	NA	NA	NA	NA	NA	NA	NA	NA	NA	NA	NA
prot_dep	1	P55056	-0.18632	0.255717	Higher in Case	0.0476453	Plasma Proteome (Depleted)	NA	NA	NA	NA	NA	NA	NA	NA	NA	NA	NA
stool_gene	1	K10697	-0.187457	0.253845	Higher in Case	0.047585	Fecal Metagenome (Genes)	NA	NA	NA	NA	NA	NA	NA	NA	NA	NA	NA
prot_dep	1	Q9NPY3	0.130383	-0.359333	Lower in Case	0.0468508	Plasma Proteome (Depleted)	NA	NA	NA	NA	NA	NA	NA	NA	NA	NA	NA
stool_gene	1	K23975	0.178212	-0.259466	Lower in Case	0.0462399	Fecal Metagenome (Genes)	NA	NA	NA	NA	NA	NA	NA	NA	NA	NA	NA
met_fecal	1	pos_0632	0.168633	-0.269694	Lower in Case	0.0454794	Fecal Metabolome	134.045	8.77	row926	E1791;E1795	C00242;C00049;C00402	Guanine;L-Aspartate$D-Aspartate	positive	up_in_svn	8.77	134.045	L-Aspartic acid
met_vams	1	rLC_neg_mtb_211770	-0.236324	0.189869	Higher in Case	0.0448705	VAMS Metabolome	1006.46	0.0206667	row775				negative	up_in_svn	NA	NA	NA
clinical	1	m_bmiincl	0.380046	-0.116493	Lower in Case	0.0442727	Clinical	NA	NA	NA	NA	NA	NA	NA	NA	NA	NA	NA
prot_fecal	1	B5MCY1	-0.195196	0.224564	Higher in Case	0.0438341	Fecal Proteome	NA	NA	NA	NA	NA	NA	NA	NA	NA	NA	NA
met_pla	1	rLC_pos_mtb_1040252	0.197555	-0.215504	Lower in Case	0.0425738	Plasma Metabolome	403.007	0.0806	row788				positive	down_in_svn	NA	NA	NA
stool_gene	1	PL17_0	0.189477	-0.223715	Lower in Case	0.0423889	Fecal Metagenome (Genes)	NA	NA	NA	NA	NA	NA	NA	NA	NA	NA	NA
stool_microbiome	1	Bacteroides.uniformis	0.159373	-0.260401	Lower in Case	0.0415009	Fecal Microbiome (Taxa)	NA	NA	NA	NA	NA	NA	NA	NA	NA	NA	NA
stool_gene	1	GH116_0	0.162461	-0.252781	Lower in Case	0.0410669	Fecal Metagenome (Genes)	NA	NA	NA	NA	NA	NA	NA	NA	NA	NA	NA
met_pla	1	rLC_pos_mtb_163379	0.197233	-0.20621	Lower in Case	0.0406715	Plasma Metabolome	247.093	0.0248	row384				positive	down_in_svn	NA	NA	NA
met_pla	1	rLC_pos_mtb_160431	0.196481	-0.205219	Lower in Case	0.0403216	Plasma Metabolome	114.055	0.0248	row763				positive	down_in_svn	NA	NA	NA
prot_dep	1	Q8NBP7	0.14264	-0.281982	Lower in Case	0.040222	Plasma Proteome (Depleted)	NA	NA	NA	NA	NA	NA	NA	NA	NA	NA	NA
stool_microbiome	1	Alistipes.shahii	0.149534	-0.268737	Lower in Case	0.0401853	Fecal Microbiome (Taxa)	NA	NA	NA	NA	NA	NA	NA	NA	NA	NA	NA
stool_gene	1	K13059	0.168403	-0.234347	Lower in Case	0.0394648	Fecal Metagenome (Genes)	NA	NA	NA	NA	NA	NA	NA	NA	NA	NA	NA
prot_dep	1	O60343	0.160727	-0.245527	Lower in Case	0.0394628	Plasma Proteome (Depleted)	NA	NA	NA	NA	NA	NA	NA	NA	NA	NA	NA
met_fecal	1	pos_0641	-0.108999	0.359845	Higher in Case	0.0392229	Fecal Metabolome	134.118	6.39	row121				positive	up_in_svn	6.39	134.118	Unknown
stool_gene	1	Blon_2343 Blon_2346	0.133998	-0.29121	Lower in Case	0.0390215	Fecal Metagenome (Genes)	NA	NA	NA	NA	NA	NA	NA	NA	NA	NA	NA
prot_nav	1	P02765	0.165444	-0.23556	Lower in Case	0.038972	Plasma Proteome (Naive)	NA	NA	NA	NA	NA	NA	NA	NA	NA	NA	NA
stool_microbiome	1	Unknown_Faecalibacterium.25	0.195523	-0.196827	Lower in Case	0.0384842	Fecal Microbiome (Taxa)	NA	NA	NA	NA	NA	NA	NA	NA	NA	NA	NA
prot_nav	1	P55201	0.199079	-0.192311	Lower in Case	0.0382852	Plasma Proteome (Naive)	NA	NA	NA	NA	NA	NA	NA	NA	NA	NA	NA
met_pla	1	rLC_pos_mtb_161533	0.192685	-0.196942	Lower in Case	0.0379477	Plasma Metabolome	160.061	0.0248	row411				positive	down_in_svn	NA	NA	NA
met_vams	1	rLC_neg_mtb_4801736	0.132389	-0.283817	Lower in Case	0.0375741	VAMS Metabolome	762.528	0.448467	row7494				negative	up_in_svn	NA	NA	NA
met_pla	1	rLC_pos_mtb_9521442	0.143746	-0.259559	Lower in Case	0.0373107	Plasma Metabolome	315.081	0.661333	row286				positive	down_in_svn	NA	NA	NA
prot_dep	1	Q6JQN1	0.186306	-0.199414	Lower in Case	0.037152	Plasma Proteome (Depleted)	NA	NA	NA	NA	NA	NA	NA	NA	NA	NA	NA
stool_scfa	1	Isobutyrate	0.252238	-0.146996	Lower in Case	0.0370781	Fecal SCFAs	NA	NA	NA	NA	NA	NA	NA	NA	NA	NA	NA
prot_nav	1	Q9P2R6	0.174438	-0.209578	Lower in Case	0.0365585	Plasma Proteome (Naive)	NA	NA	NA	NA	NA	NA	NA	NA	NA	NA	NA
stool_gene	1	K05822	0.102889	-0.350723	Lower in Case	0.0360856	Fecal Metagenome (Genes)	NA	NA	NA	NA	NA	NA	NA	NA	NA	NA	NA
met_pla	1	rLC_neg_mtb_1403626	0.168913	-0.213029	Lower in Case	0.0359833	Plasma Metabolome	960.878	0.165333	row2522	E923	C00341	Geranyl diphosphate	negative	down_in_svn	NA	NA	NA
met_pla	1	rLC_pos_mtb_516532	0.179592	-0.200345	Lower in Case	0.0359803	Plasma Metabolome	263.124	31	row366				positive	down_in_svn	NA	NA	NA
met_fecal	1	pos_1482	0.118689	-0.302449	Lower in Case	0.0358972	Fecal Metabolome	189.16	8.8	row156	E12	C03793	N6,N6,N6-Trimethyl-L-lysine	positive	down_in_svn	8.8	189.16	Unknown
stool_gene	1	K21741	0.136102	-0.259102	Lower in Case	0.0352642	Fecal Metagenome (Genes)	NA	NA	NA	NA	NA	NA	NA	NA	NA	NA	NA
met_fecal	1	pos_5295	-0.0983309	0.357097	Higher in Case	0.0351136	Fecal Metabolome	512.24	1.48	row1029				positive	up_in_svn	1.48	512.24	Unknown
met_pla	1	rLC_pos_mtb_944671	0.144728	-0.241536	Lower in Case	0.034957	Plasma Metabolome	438.973	0.0806	row1021				positive	down_in_svn	NA	NA	NA
met_vams	1	rLC_neg_mtb_221635	0.107637	-0.32385	Lower in Case	0.0348583	VAMS Metabolome	1272.66	0.0268667	row8014				negative	down_in_svn	NA	NA	NA
met_pla	1	rLC_pos_mtb_899847	0.157793	-0.219577	Lower in Case	0.0346478	Plasma Metabolome	315.081	0.0723333	row1108	E718	C00499	Allantoate; Allantoic acid	positive	down_in_svn	NA	NA	NA
prot_nav	1	A0A1W2PQ73	0.126711	-0.27311	Lower in Case	0.034606	Plasma Proteome (Naive)	NA	NA	NA	NA	NA	NA	NA	NA	NA	NA	NA
stool_gene	1	K16435	0.168699	-0.201918	Lower in Case	0.0340634	Fecal Metagenome (Genes)	NA	NA	NA	NA	NA	NA	NA	NA	NA	NA	NA
stool_microbiome	1	CAG.110.sp900546075	0.113092	-0.300072	Lower in Case	0.0339357	Fecal Microbiome (Taxa)	NA	NA	NA	NA	NA	NA	NA	NA	NA	NA	NA
prot_dep	1	P15151	0.106995	-0.315623	Lower in Case	0.0337699	Plasma Proteome (Depleted)	NA	NA	NA	NA	NA	NA	NA	NA	NA	NA	NA
prot_nav	1	Q9HCK8	0.160888	-0.207658	Lower in Case	0.0334098	Plasma Proteome (Naive)	NA	NA	NA	NA	NA	NA	NA	NA	NA	NA	NA
prot_dep	1	Q08378	0.171712	-0.194133	Lower in Case	0.0333349	Plasma Proteome (Depleted)	NA	NA	NA	NA	NA	NA	NA	NA	NA	NA	NA
stool_gene	1	K17981	-0.158265	0.208911	Higher in Case	0.0330634	Fecal Metagenome (Genes)	NA	NA	NA	NA	NA	NA	NA	NA	NA	NA	NA
met_vams	1	rLC_pos_mtb_2990305	0.100627	-0.326094	Lower in Case	0.0328137	VAMS Metabolome	1001.65	0.206667	row262	E159	CE5840;CE5838	$	positive	down_in_svn	NA	NA	NA
prot_nav	1	O75717	0.142065	-0.230751	Lower in Case	0.0327816	Plasma Proteome (Naive)	NA	NA	NA	NA	NA	NA	NA	NA	NA	NA	NA
met_fecal	1	pos_0175	0.0926202	-0.352806	Lower in Case	0.032677	Fecal Metabolome	94.0452	9.75	row2725				positive	down_in_svn	9.75	94.0452	Unknown
met_vams	1	rLC_pos_mtb_1138292	0.137526	-0.235701	Lower in Case	0.0324151	VAMS Metabolome	220.941	0.0723333	row2007				positive	up_in_svn	NA	NA	NA
prot_fecal	1	P69891	0.106514	-0.304008	Lower in Case	0.032381	Fecal Proteome	NA	NA	NA	NA	NA	NA	NA	NA	NA	NA	NA
stool_gene	1	K23677	-0.148116	0.21818	Higher in Case	0.0323158	Fecal Metagenome (Genes)	NA	NA	NA	NA	NA	NA	NA	NA	NA	NA	NA
met_vams	1	rLC_neg_mtb_4076004	0.169318	-0.188925	Lower in Case	0.0319884	VAMS Metabolome	568.355	0.400933	row7432				negative	up_in_svn	NA	NA	NA
prot_dep	1	P02765	0.165263	-0.191256	Lower in Case	0.0316075	Plasma Proteome (Depleted)	NA	NA	NA	NA	NA	NA	NA	NA	NA	NA	NA
met_fecal	1	pos_0568	0.121358	-0.260302	Lower in Case	0.0315897	Fecal Metabolome	129.102	5.54	row128	E387;E394	C00047;C00437	L-Lysine;N2-Acetyl-L-ornithine	positive	down_in_svn	5.54	129.102	Unknown
met_fecal	1	pos_2891	-0.12578	0.250093	Higher in Case	0.0314566	Fecal Metabolome	275.175	1.15	row1154				positive	up_in_svn	1.15	275.175	Unknown
prot_fecal	1	Q9P0S9	0.167241	-0.18681	Lower in Case	0.0312423	Fecal Proteome	NA	NA	NA	NA	NA	NA	NA	NA	NA	NA	NA
prot_dep	1	O94979	0.127425	-0.23947	Lower in Case	0.0305144	Plasma Proteome (Depleted)	NA	NA	NA	NA	NA	NA	NA	NA	NA	NA	NA
stool_microbiome	1	UMGS1633.sp900553645	0.10067	-0.300878	Lower in Case	0.0302896	Fecal Microbiome (Taxa)	NA	NA	NA	NA	NA	NA	NA	NA	NA	NA	NA
prot_dep	1	P05362	-0.118587	0.25422	Higher in Case	0.0301471	Plasma Proteome (Depleted)	NA	NA	NA	NA	NA	NA	NA	NA	NA	NA	NA
met_pla	1	rLC_pos_mtb_164103	0.159581	-0.187704	Lower in Case	0.029954	Plasma Metabolome	294.103	0.0248	row458				positive	down_in_svn	NA	NA	NA
met_vams	1	rLC_neg_mtb_4849577	0.132632	-0.223827	Lower in Case	0.0296866	VAMS Metabolome	764.531	0.456733	row1370				negative	up_in_svn	NA	NA	NA
prot_fecal	1	P07098-2	0.0912988	-0.32388	Lower in Case	0.0295698	Fecal Proteome	NA	NA	NA	NA	NA	NA	NA	NA	NA	NA	NA
met_fecal	1	pos_3354	-0.128224	0.22938	Higher in Case	0.0294121	Fecal Metabolome	305.215	1.12	row2243				positive	up_in_svn	1.12	305.215	Unknown
stool_gene	1	K09165	-0.110816	0.265075	Higher in Case	0.0293746	Fecal Metagenome (Genes)	NA	NA	NA	NA	NA	NA	NA	NA	NA	NA	NA
prot_fecal	1	H3BN98	0.17594	-0.166596	Lower in Case	0.029311	Fecal Proteome	NA	NA	NA	NA	NA	NA	NA	NA	NA	NA	NA
stool_gene	1	K07017	0.15424	-0.189838	Lower in Case	0.0292806	Fecal Metagenome (Genes)	NA	NA	NA	NA	NA	NA	NA	NA	NA	NA	NA
prot_nav	1	Q9P2D1	0.184348	-0.156757	Lower in Case	0.0288979	Plasma Proteome (Naive)	NA	NA	NA	NA	NA	NA	NA	NA	NA	NA	NA
met_vams	1	rLC_neg_mtb_3677152	0.109701	-0.259275	Lower in Case	0.0284427	VAMS Metabolome	483.357	0.338933	row1183				negative	down_in_svn	NA	NA	NA
prot_nav	1	Q9Y2G9	0.0970209	-0.293043	Lower in Case	0.0284313	Plasma Proteome (Naive)	NA	NA	NA	NA	NA	NA	NA	NA	NA	NA	NA
stool_gene	1	K13327	0.126909	-0.220366	Lower in Case	0.0279665	Fecal Metagenome (Genes)	NA	NA	NA	NA	NA	NA	NA	NA	NA	NA	NA
prot_nav	1	Q8WWF6	-0.158133	0.174964	Higher in Case	0.0276676	Plasma Proteome (Naive)	NA	NA	NA	NA	NA	NA	NA	NA	NA	NA	NA
met_pla	1	rLC_pos_mtb_178629	0.151515	-0.181498	Lower in Case	0.0274998	Plasma Metabolome	132.066	0.0227333	row731	E570	C11555;C04520;C01272;C04477	1D-myo-Inositol 1,4,5,6-tetrakisphosphate; D-myo-Inositol 1,4,5,6-tetrakisphosphate; Inositol 1,4,5,6-tetrakisphosphate$1D-myo-Inositol 3,4,5,6-tetrakisphosphate; D-myo-Inositol 3,4,5,6-tetrakisphosphate; Inositol 3,4,5,6-tetrakisphosphate$1D-myo-Inositol 1,3,4,5-tetrakisphosphate$1D-myo-Inositol 1,3,4,6-tetrakisphosphate; D-myo-Inositol 1,3,4,6-tetrakisphosphate; Inositol 1,3,4,6-tetrakisphospha…	positive	down_in_svn	NA	NA	NA
met_pla	1	rLC_pos_mtb_918727	0.13283	-0.206054	Lower in Case	0.0273702	Plasma Metabolome	316.084	0.0723333	row1443				positive	down_in_svn	NA	NA	NA
met_fecal	1	pos_0474	-0.0641803	0.425889	Higher in Case	0.0273337	Fecal Metabolome	122.071	6.71	row29				positive	up_in_svn	6.71	122.071	Unknown
met_fecal	1	pos_1799	-0.0950534	0.28366	Higher in Case	0.0269629	Fecal Metabolome	209.078	5.64	row1246				positive	up_in_svn	5.64	209.078	w/o MS2:Gabapentin related compound E
prot_fecal	1	Q6P1J6	0.0692632	-0.389211	Lower in Case	0.026958	Fecal Proteome	NA	NA	NA	NA	NA	NA	NA	NA	NA	NA	NA
stool_microbiome	1	UMGS973.sp900547295	0.0783972	-0.340896	Lower in Case	0.0267253	Fecal Microbiome (Taxa)	NA	NA	NA	NA	NA	NA	NA	NA	NA	NA	NA
prot_dep	1	Q14520	-0.118693	0.224375	Higher in Case	0.0266319	Plasma Proteome (Depleted)	NA	NA	NA	NA	NA	NA	NA	NA	NA	NA	NA
met_fecal	1	pos_3899	0.105097	-0.252988	Lower in Case	0.0265883	Fecal Metabolome	348.145	3.08	row1255				positive	down_in_svn	3.08	348.145	Unknown
met_pla	1	rLC_pos_mtb_164101	0.146413	-0.179866	Lower in Case	0.0263347	Plasma Metabolome	293.102	0.0268667	row750				positive	down_in_svn	NA	NA	NA
prot_fecal	1	Q9NXJ0-2	-0.11263	0.231628	Higher in Case	0.0260882	Fecal Proteome	NA	NA	NA	NA	NA	NA	NA	NA	NA	NA	NA
met_pla	1	rLC_pos_mtb_164108	0.144354	-0.179627	Lower in Case	0.0259298	Plasma Metabolome	295.104	0.0165333	row604				positive	down_in_svn	NA	NA	NA
prot_fecal	1	Q9HD45	0.203925	-0.126065	Lower in Case	0.0257078	Fecal Proteome	NA	NA	NA	NA	NA	NA	NA	NA	NA	NA	NA
met_pla	1	rLC_pos_mtb_164119	0.144122	-0.176074	Lower in Case	0.0253762	Plasma Metabolome	296.106	0.0227333	row590				positive	down_in_svn	NA	NA	NA
met_pla	1	rLC_neg_mtb_4055435	-0.0930462	0.272472	Higher in Case	0.0253525	Plasma Metabolome	277.05	0.475333	row611				negative	up_in_svn	NA	NA	NA
prot_fecal	1	A4D1S5	-0.219079	0.11444	Higher in Case	0.0250713	Fecal Proteome	NA	NA	NA	NA	NA	NA	NA	NA	NA	NA	NA
stool_gene	1	3002647	0.1121	-0.223504	Lower in Case	0.0250548	Fecal Metagenome (Genes)	NA	NA	NA	NA	NA	NA	NA	NA	NA	NA	NA
met_pla	1	rLC_pos_mtb_1193975	0.116199	-0.212762	Lower in Case	0.0247227	Plasma Metabolome	988.918	0.0971333	row711	E350	C00135	L-Histidine	positive	down_in_svn	NA	NA	NA
prot_fecal	1	P62263	0.115934	-0.207623	Lower in Case	0.0240706	Fecal Proteome	NA	NA	NA	NA	NA	NA	NA	NA	NA	NA	NA
prot_nav	1	P06396	0.105926	-0.227192	Lower in Case	0.0240655	Plasma Proteome (Naive)	NA	NA	NA	NA	NA	NA	NA	NA	NA	NA	NA
prot_dep	1	Q8IW92	0.127799	-0.18728	Lower in Case	0.0239342	Plasma Proteome (Depleted)	NA	NA	NA	NA	NA	NA	NA	NA	NA	NA	NA
met_fecal	1	pos_1578	-0.0775716	0.304578	Higher in Case	0.0236266	Fecal Metabolome	196.097	6.82	row1343	E780;E837	C16586;CE2173;CE1918;CE5629	2-Phenyl-1,3-propanediol monocarbamate$;5-hydroxytryptophol$1,2-dehydrosalsolinol	positive	up_in_svn	6.82	196.097	O-Benzyl-L-serine
met_vams	1	rLC_neg_mtb_3780637	-0.092639	0.254773	Higher in Case	0.0236019	VAMS Metabolome	538.447	0.361667	row73	E1	C00208;C00252;C00243;C01083;C00089;C01235;C05400;C05402	Maltose$Isomaltose; Brachiose$Lactose$Trehalose$Sucrose$1-alpha-D-Galactosyl-myo-inositol; 1-O-alpha-D-Galactosyl-D-myo-inositol; Galactinol$Epimelibiose$Melibiose	negative	up_in_svn	NA	NA	NA
met_fecal	1	pos_3980	-0.0733856	0.320925	Higher in Case	0.0235513	Fecal Metabolome	355.186	1.43	row547				positive	up_in_svn	1.43	355.186	Unknown
met_vams	1	rLC_neg_mtb_1337890	-0.0866575	0.268236	Higher in Case	0.0232447	VAMS Metabolome	619.184	0.115733	row223	E277;E393	CE2176;C00082;CE2174	3-O-methyldopa;L-Tyrosine$	negative	up_in_svn	NA	NA	NA
stool_gene	1	K11383	0.098857	-0.233556	Lower in Case	0.0230886	Fecal Metagenome (Genes)	NA	NA	NA	NA	NA	NA	NA	NA	NA	NA	NA
prot_fecal	1	P50395	0.105516	-0.211865	Lower in Case	0.0223553	Fecal Proteome	NA	NA	NA	NA	NA	NA	NA	NA	NA	NA	NA
prot_dep	1	Q8NG08	0.10842	-0.204414	Lower in Case	0.0221625	Plasma Proteome (Depleted)	NA	NA	NA	NA	NA	NA	NA	NA	NA	NA	NA
met_pla	1	rLC_neg_mtb_475748	-0.0664371	0.327734	Higher in Case	0.0217737	Plasma Metabolome	306.045	0.0744	row2				negative	up_in_svn	NA	NA	NA
met_vams	1	rLC_neg_mtb_3369248	-0.0756049	0.287991	Higher in Case	0.0217735	VAMS Metabolome	207.046	0.2976	row5049				negative	up_in_svn	NA	NA	NA
prot_dep	1	Q14839	0.0825284	-0.263798	Lower in Case	0.0217708	Plasma Proteome (Depleted)	NA	NA	NA	NA	NA	NA	NA	NA	NA	NA	NA
met_fecal	1	pos_3401	-0.0807239	0.269424	Higher in Case	0.021749	Fecal Metabolome	309.181	2.66	row1126	E129	andrstndn;C00280	Androstenedione$Androst-4-ene-3,17-dione; Androstenedione; 4-Androstene-3,17-dione	positive	up_in_svn	2.66	309.181	Unknown
met_pla	1	rLC_pos_mtb_1191503	0.0989758	-0.218191	Lower in Case	0.0215956	Plasma Metabolome	826.913	0.0950667	row1562				positive	down_in_svn	NA	NA	NA
prot_dep	1	P78527	-0.112517	0.191661	Higher in Case	0.0215651	Plasma Proteome (Depleted)	NA	NA	NA	NA	NA	NA	NA	NA	NA	NA	NA
prot_nav	1	Q6AHZ1	0.10458	-0.203823	Lower in Case	0.0213158	Plasma Proteome (Naive)	NA	NA	NA	NA	NA	NA	NA	NA	NA	NA	NA
prot_nav	1	P02743	-0.0923812	0.23066	Higher in Case	0.0213086	Plasma Proteome (Naive)	NA	NA	NA	NA	NA	NA	NA	NA	NA	NA	NA
met_pla	1	rLC_pos_mtb_1187805	0.101916	-0.208355	Lower in Case	0.0212346	Plasma Metabolome	582.903	93	row167				positive	down_in_svn	NA	NA	NA
met_pla	1	rLC_pos_mtb_175911	0.117847	-0.178526	Lower in Case	0.0210389	Plasma Metabolome	86.0604	0.0206667	row203	E22;E24;E27	C03564;C02356;C01026;C00334;C05145;C01205;C03284;C01165;C01157;C00430;C03440;C01110	1-Pyrroline-2-carboxylate; 1-Pyrroline-2-carboxylic acid; delta1-Pyrroline 2-carboxylate;(S)-2-Aminobutanoate; (S)-2-Aminobutanoic acid; (S)-2-Aminobutyric acid$N,N-Dimethylglycine; Dimethylglycine$4-Aminobutanoate$3-Aminoisobutyric acid; 3-Aminoisobutanoate; 3-Amino-2-methylpropanoate$D-3-Amino-isobutanoate$L-3-Amino-isobutanoate;L-Glutamate 5-semialdehyde; L-Glutamate gamma-semialdehyde$trans-4…	positive	down_in_svn	NA	NA	NA
stool_microbiome	1	Unknown_CAG.170.9	0.0941216	-0.221728	Lower in Case	0.0208694	Fecal Microbiome (Taxa)	NA	NA	NA	NA	NA	NA	NA	NA	NA	NA	NA
prot_nav	1	Q9H257	-0.0790407	0.263069	Higher in Case	0.0207931	Plasma Proteome (Naive)	NA	NA	NA	NA	NA	NA	NA	NA	NA	NA	NA
prot_dep	1	P06396	0.109431	-0.18946	Lower in Case	0.0207329	Plasma Proteome (Depleted)	NA	NA	NA	NA	NA	NA	NA	NA	NA	NA	NA
met_fecal	1	pos_0263	-0.0638763	0.314265	Higher in Case	0.0200741	Fecal Metabolome	102.128	1.04	row1231				positive	down_in_svn	1.04	102.128	Unknown
stool_gene	1	K15303	0.10233	-0.194733	Lower in Case	0.0199271	Fecal Metagenome (Genes)	NA	NA	NA	NA	NA	NA	NA	NA	NA	NA	NA
prot_nav	1	P14151	0.0840874	-0.234441	Lower in Case	0.0197135	Plasma Proteome (Naive)	NA	NA	NA	NA	NA	NA	NA	NA	NA	NA	NA
prot_fecal	1	P13796	0.0991301	-0.193164	Lower in Case	0.0191483	Fecal Proteome	NA	NA	NA	NA	NA	NA	NA	NA	NA	NA	NA
stool_gene	1	K07465	-0.105229	0.180665	Higher in Case	0.0190113	Fecal Metagenome (Genes)	NA	NA	NA	NA	NA	NA	NA	NA	NA	NA	NA
prot_dep	1	P02656	-0.101859	0.185625	Higher in Case	0.0189075	Plasma Proteome (Depleted)	NA	NA	NA	NA	NA	NA	NA	NA	NA	NA	NA
met_pla	1	rLC_pos_mtb_1049338	0.0893707	-0.210426	Lower in Case	0.0188059	Plasma Metabolome	813.023	0.103333	row890				positive	down_in_svn	NA	NA	NA
stool_gene	1	K21739	0.0786757	-0.238834	Lower in Case	0.0187904	Fecal Metagenome (Genes)	NA	NA	NA	NA	NA	NA	NA	NA	NA	NA	NA
prot_fecal	1	P31151	-0.0793811	0.233479	Higher in Case	0.0185338	Fecal Proteome	NA	NA	NA	NA	NA	NA	NA	NA	NA	NA	NA
prot_dep	1	Q92820	0.0891193	-0.207409	Lower in Case	0.0184841	Plasma Proteome (Depleted)	NA	NA	NA	NA	NA	NA	NA	NA	NA	NA	NA
stool_gene	1	K12542	0.10923	-0.16905	Lower in Case	0.0184653	Fecal Metagenome (Genes)	NA	NA	NA	NA	NA	NA	NA	NA	NA	NA	NA
stool_microbiome	1	CAG.110.sp900540635	0.0690469	-0.265276	Lower in Case	0.0183165	Fecal Microbiome (Taxa)	NA	NA	NA	NA	NA	NA	NA	NA	NA	NA	NA
met_fecal	1	pos_4028	-0.0924308	0.196292	Higher in Case	0.0181434	Fecal Metabolome	359.295	1.13	row1485	E1506;E1881	CE2206;CE2203;C17337;C03990	24-oxo-1alpha,25-dihydroxyvitamin D3$25-hydroxyvitamin D3-26,23-lactol$7alpha-Hydroxy-3-oxo-4-cholestenoate;3alpha-Hydroxy-5beta-cholanate; 3alpha-Hydroxy-5beta-cholanic acid; Lithocholic acid; Lithocholate	positive	down_in_svn	1.13	359.295	w/o MS2:Lithocholic acid
met_pla	1	rLC_pos_mtb_1174572	0.0791708	-0.223916	Lower in Case	0.0177276	Plasma Metabolome	1266.87	0.109533	row473				positive	down_in_svn	NA	NA	NA
met_pla	1	rLC_pos_mtb_853706	0.092536	-0.189298	Lower in Case	0.0175168	Plasma Metabolome	629.146	0.0723333	row1392				positive	down_in_svn	NA	NA	NA
met_pla	1	rLC_pos_mtb_161536	0.100756	-0.173277	Lower in Case	0.0174587	Plasma Metabolome	161.064	0.0248	row400				positive	down_in_svn	NA	NA	NA
met_vams	1	rLC_neg_mtb_3344498	-0.0688052	0.251011	Higher in Case	0.0172709	VAMS Metabolome	221.027	0.2976	row3526				negative	up_in_svn	NA	NA	NA
stool_gene	1	K01178	-0.0664945	0.257981	Higher in Case	0.0171543	Fecal Metagenome (Genes)	NA	NA	NA	NA	NA	NA	NA	NA	NA	NA	NA
prot_dep	1	O14498	0.0863936	-0.19612	Lower in Case	0.0169435	Plasma Proteome (Depleted)	NA	NA	NA	NA	NA	NA	NA	NA	NA	NA	NA
met_fecal	1	pos_0837	-0.055652	0.300655	Higher in Case	0.0167321	Fecal Metabolome	148.043	7.59	row327				positive	up_in_svn	7.59	148.043	Unknown
met_fecal	1	pos_1204	-0.0603923	0.275403	Higher in Case	0.0166322	Fecal Metabolome	173.092	7.58	row1981	E1905	C02576	Perillyl aldehyde; Perillaldehyde	positive	down_in_svn	7.58	173.092	Pro-Gly
prot_fecal	1	Q9Y3I0	-0.0882668	0.186247	Higher in Case	0.0164394	Fecal Proteome	NA	NA	NA	NA	NA	NA	NA	NA	NA	NA	NA
stool_gene	1	GH16_19	-0.104023	0.157144	Higher in Case	0.0163467	Fecal Metagenome (Genes)	NA	NA	NA	NA	NA	NA	NA	NA	NA	NA	NA
stool_gene	1	K00036	0.0660253	-0.243115	Lower in Case	0.0160517	Fecal Metagenome (Genes)	NA	NA	NA	NA	NA	NA	NA	NA	NA	NA	NA
prot_nav	1	P06727	0.0746544	-0.21316	Lower in Case	0.0159133	Plasma Proteome (Naive)	NA	NA	NA	NA	NA	NA	NA	NA	NA	NA	NA
met_vams	1	rLC_neg_mtb_287334	0.0461957	-0.340973	Lower in Case	0.0157515	VAMS Metabolome	1220.48	0.0227333	row3791				negative	down_in_svn	NA	NA	NA
prot_fecal	1	P02766	0.0448212	-0.350833	Lower in Case	0.0157247	Fecal Proteome	NA	NA	NA	NA	NA	NA	NA	NA	NA	NA	NA
prot_dep	1	P51812	0.0932766	-0.165287	Lower in Case	0.0154174	Plasma Proteome (Depleted)	NA	NA	NA	NA	NA	NA	NA	NA	NA	NA	NA
met_fecal	1	pos_1247	0.0562691	-0.264896	Lower in Case	0.0149055	Fecal Metabolome	175.119	9.15	row2868	E1825	C00062;C00792	L-Arginine$D-Arginine; D-2-Amino-5-guanidinovaleric acid	positive	down_in_svn	9.15	175.119	Arginine
prot_nav	1	P00915	0.0596169	-0.249804	Lower in Case	0.0148926	Plasma Proteome (Naive)	NA	NA	NA	NA	NA	NA	NA	NA	NA	NA	NA
prot_nav	1	P02647	0.0716041	-0.207479	Lower in Case	0.0148563	Plasma Proteome (Naive)	NA	NA	NA	NA	NA	NA	NA	NA	NA	NA	NA
met_pla	1	rLC_neg_mtb_1866189	0.0913173	-0.158949	Lower in Case	0.0145148	Plasma Metabolome	666.982	0.208733	row2734				negative	down_in_svn	NA	NA	NA
met_fecal	1	pos_2975	-0.0912798	0.155719	Higher in Case	0.014214	Fecal Metabolome	281.196	1.16	row1901				positive	down_in_svn	1.16	281.196	Unknown
prot_dep	1	P06276	0.0797793	-0.175486	Lower in Case	0.0140001	Plasma Proteome (Depleted)	NA	NA	NA	NA	NA	NA	NA	NA	NA	NA	NA
clinical	1	impr_sanitation	-0.307412	0.0454641	Higher in Case	0.0139762	Clinical	NA	NA	NA	NA	NA	NA	NA	NA	NA	NA	NA
met_pla	1	rLC_pos_mtb_772601	0.0690287	-0.200924	Lower in Case	0.0138695	Plasma Metabolome	317.083	0.0723333	row1984				positive	down_in_svn	NA	NA	NA
prot_dep	1	Q9Y4L1	-0.0755614	0.18186	Higher in Case	0.0137416	Plasma Proteome (Depleted)	NA	NA	NA	NA	NA	NA	NA	NA	NA	NA	NA
stool_scfa	1	Propionate	-0.0778885	0.168753	Higher in Case	0.0131439	Fecal SCFAs	NA	NA	NA	NA	NA	NA	NA	NA	NA	NA	NA
stool_gene	1	K09758	0.0557261	-0.235603	Lower in Case	0.0131292	Fecal Metagenome (Genes)	NA	NA	NA	NA	NA	NA	NA	NA	NA	NA	NA
prot_dep	1	P02655	-0.0545173	0.240158	Higher in Case	0.0130928	Plasma Proteome (Depleted)	NA	NA	NA	NA	NA	NA	NA	NA	NA	NA	NA
met_fecal	1	pos_4962	-0.0605286	0.212503	Higher in Case	0.0128625	Fecal Metabolome	458.333	1.13	row1924				positive	up_in_svn	1.13	458.333	Unknown
prot_dep	1	O95389	0.0554662	-0.231666	Lower in Case	0.0128496	Plasma Proteome (Depleted)	NA	NA	NA	NA	NA	NA	NA	NA	NA	NA	NA
prot_fecal	1	P39656-3	0.0582111	-0.216769	Lower in Case	0.0126183	Fecal Proteome	NA	NA	NA	NA	NA	NA	NA	NA	NA	NA	NA
prot_dep	1	P02774	0.0774971	-0.161659	Lower in Case	0.0125281	Plasma Proteome (Depleted)	NA	NA	NA	NA	NA	NA	NA	NA	NA	NA	NA
stool_microbiome	1	Agathobaculum.sp900544475	0.0672303	-0.181136	Lower in Case	0.0121778	Fecal Microbiome (Taxa)	NA	NA	NA	NA	NA	NA	NA	NA	NA	NA	NA
met_pla	1	rLC_pos_mtb_943460	0.0661829	-0.183961	Lower in Case	0.0121751	Plasma Metabolome	359.043	0.0806	row676				positive	down_in_svn	NA	NA	NA
met_fecal	1	pos_1782	0.0629488	-0.193316	Lower in Case	0.012169	Fecal Metabolome	208.014	6.78	row1019				positive	up_in_svn	6.78	208.014	Unknown
met_pla	1	rLC_neg_mtb_4055304	-0.0596172	0.203229	Higher in Case	0.0121159	Plasma Metabolome	261.041	0.4712	row5401				negative	up_in_svn	NA	NA	NA
met_fecal	1	pos_0449	-0.0333216	0.362814	Higher in Case	0.0120895	Fecal Metabolome	119.09	7.17	row916				positive	up_in_svn	7.17	119.09	Cumylamine
met_vams	1	rLC_neg_mtb_2213325	-0.0697431	0.17263	Higher in Case	0.0120398	VAMS Metabolome	340.987	0.219067	row7728				negative	up_in_svn	NA	NA	NA
met_vams	1	rLC_neg_mtb_1331205	0.0562544	-0.213516	Lower in Case	0.0120112	VAMS Metabolome	117.019	0.144667	row4335	E1421	CE5868	N-acetyl-seryl-aspartate	negative	up_in_svn	NA	NA	NA
met_vams	1	rLC_neg_mtb_1261554	0.0581986	-0.204753	Lower in Case	0.0119164	VAMS Metabolome	939.244	124	row5599				negative	down_in_svn	NA	NA	NA
met_vams	1	rLC_neg_mtb_5831208	0.0471869	-0.247968	Lower in Case	0.0117008	VAMS Metabolome	358.038	0.566267	row7536				negative	down_in_svn	NA	NA	NA
met_pla	1	rLC_neg_mtb_4067939	-0.0519219	0.223529	Higher in Case	0.011606	Plasma Metabolome	141.017	0.4898	row4049				negative	up_in_svn	NA	NA	NA
stool_gene	1	3005064	0.064691	-0.178352	Lower in Case	0.0115378	Fecal Metagenome (Genes)	NA	NA	NA	NA	NA	NA	NA	NA	NA	NA	NA
prot_dep	1	P02751	-0.0453073	0.253865	Higher in Case	0.0115019	Plasma Proteome (Depleted)	NA	NA	NA	NA	NA	NA	NA	NA	NA	NA	NA
prot_nav	1	P0DOX3	-0.0683441	0.167652	Higher in Case	0.011458	Plasma Proteome (Naive)	NA	NA	NA	NA	NA	NA	NA	NA	NA	NA	NA
met_vams	1	rLC_neg_mtb_292414	0.0793909	-0.141999	Lower in Case	0.0112734	VAMS Metabolome	1599.63	0.00413333	row6198				negative	up_in_svn	NA	NA	NA
prot_nav	1	A0A0B4J1X8	-0.0430904	0.259089	Higher in Case	0.0111642	Plasma Proteome (Naive)	NA	NA	NA	NA	NA	NA	NA	NA	NA	NA	NA
met_vams	1	rLC_neg_mtb_5637488	0.0441964	-0.251251	Lower in Case	0.0111044	VAMS Metabolome	216.038	0.516667	row3260				negative	down_in_svn	NA	NA	NA
clinical	1	m_hbincl	-0.0923146	0.118741	Higher in Case	0.0109615	Clinical	NA	NA	NA	NA	NA	NA	NA	NA	NA	NA	NA
prot_nav	1	P04275	-0.0490586	0.223281	Higher in Case	0.0109538	Plasma Proteome (Naive)	NA	NA	NA	NA	NA	NA	NA	NA	NA	NA	NA
prot_nav	1	O00329	-0.0669811	0.162976	Higher in Case	0.0109163	Plasma Proteome (Naive)	NA	NA	NA	NA	NA	NA	NA	NA	NA	NA	NA
prot_nav	1	O15382	0.0737612	-0.147271	Lower in Case	0.0108629	Plasma Proteome (Naive)	NA	NA	NA	NA	NA	NA	NA	NA	NA	NA	NA
prot_nav	1	P26927	0.0364807	-0.294583	Lower in Case	0.0107466	Plasma Proteome (Naive)	NA	NA	NA	NA	NA	NA	NA	NA	NA	NA	NA
prot_nav	1	P00747	0.0426247	-0.251281	Lower in Case	0.0107108	Plasma Proteome (Naive)	NA	NA	NA	NA	NA	NA	NA	NA	NA	NA	NA
met_pla	1	rLC_pos_mtb_185253	0.0527845	-0.20101	Lower in Case	0.0106102	Plasma Metabolome	248.096	0.0227333	row690				positive	down_in_svn	NA	NA	NA
stool_gene	1	K02250	-0.0440741	0.236893	Higher in Case	0.0104408	Fecal Metagenome (Genes)	NA	NA	NA	NA	NA	NA	NA	NA	NA	NA	NA
met_fecal	1	pos_0625	0.0333874	-0.310387	Lower in Case	0.010363	Fecal Metabolome	133.097	9.34	row2244	E1314	C00077;C00515;C01602	Ornithine$D-Ornithine$Ornithine; 2,5-Diaminovaleric acid; 2,5-Diaminopentanoic acid; 2,5-Diaminopentanoate	positive	up_in_svn	9.34	133.097	Ornithine
stool_gene	1	PL33_0	0.0406545	-0.254222	Lower in Case	0.0103352	Fecal Metagenome (Genes)	NA	NA	NA	NA	NA	NA	NA	NA	NA	NA	NA
met_vams	1	rLC_neg_mtb_4332193	0.0388966	-0.262283	Lower in Case	0.0102019	VAMS Metabolome	502.303	0.388533	row1514				negative	down_in_svn	NA	NA	NA
prot_nav	1	P22891	0.0472842	-0.215579	Lower in Case	0.0101935	Plasma Proteome (Naive)	NA	NA	NA	NA	NA	NA	NA	NA	NA	NA	NA
prot_nav	1	O95267	0.08456	-0.117442	Lower in Case	0.0099309	Plasma Proteome (Naive)	NA	NA	NA	NA	NA	NA	NA	NA	NA	NA	NA
met_pla	1	rLC_neg_mtb_4251803	0.0577184	-0.171856	Lower in Case	0.00991929	Plasma Metabolome	187.07	0.4898	row2146				negative	down_in_svn	NA	NA	NA
prot_dep	1	P43490	0.044088	-0.223471	Lower in Case	0.00985238	Plasma Proteome (Depleted)	NA	NA	NA	NA	NA	NA	NA	NA	NA	NA	NA
prot_dep	1	Q96EZ4	0.0855964	-0.11193	Lower in Case	0.00958084	Plasma Proteome (Depleted)	NA	NA	NA	NA	NA	NA	NA	NA	NA	NA	NA
prot_nav	1	Q7Z698	-0.0807035	0.116788	Higher in Case	0.00942518	Plasma Proteome (Naive)	NA	NA	NA	NA	NA	NA	NA	NA	NA	NA	NA
met_vams	1	rLC_pos_mtb_921415	0.0417807	-0.225576	Lower in Case	0.00942474	VAMS Metabolome	608.956	0.0640667	row185				positive	down_in_svn	NA	NA	NA
stool_gene	1	CBM63_0	-0.0619918	0.151325	Higher in Case	0.00938094	Fecal Metagenome (Genes)	NA	NA	NA	NA	NA	NA	NA	NA	NA	NA	NA
met_vams	1	rLC_neg_mtb_214207	-0.0318993	0.288102	Higher in Case	0.00919023	VAMS Metabolome	1066.47	31	row3788				negative	up_in_svn	NA	NA	NA
prot_nav	1	P32119	0.0431622	-0.212077	Lower in Case	0.00915371	Plasma Proteome (Naive)	NA	NA	NA	NA	NA	NA	NA	NA	NA	NA	NA
met_vams	1	rLC_neg_mtb_31879	0.0379382	-0.234485	Lower in Case	0.00889596	VAMS Metabolome	476.986	0.00826667	row789				negative	down_in_svn	NA	NA	NA
met_pla	1	rLC_pos_mtb_188363	0.0412843	-0.210296	Lower in Case	0.00868193	Plasma Metabolome	297.108	0.0330667	row449				positive	down_in_svn	NA	NA	NA
met_vams	1	rLC_neg_mtb_912962	-0.0509501	0.168079	Higher in Case	0.00856366	VAMS Metabolome	231.05	0.0868	row1561				negative	up_in_svn	NA	NA	NA
prot_dep	1	P04217	0.0568874	-0.148589	Lower in Case	0.00845287	Plasma Proteome (Depleted)	NA	NA	NA	NA	NA	NA	NA	NA	NA	NA	NA
met_vams	1	rLC_neg_mtb_3054197	0.0385679	-0.218182	Lower in Case	0.00841484	VAMS Metabolome	NA	0.270733	row3883				negative	down_in_svn	NA	NA	NA
met_pla	1	rLC_neg_mtb_3726085	0.0405824	-0.207267	Lower in Case	0.0084114	Plasma Metabolome	331.029	0.4154	row440				negative	down_in_svn	NA	NA	NA
met_fecal	1	pos_1462	-0.0469342	0.174849	Higher in Case	0.00820641	Fecal Metabolome	188.128	6.66	row156				positive	up_in_svn	6.66	188.128	Unknown
met_pla	1	rLC_pos_mtb_663234	0.0373911	-0.211168	Lower in Case	0.00789578	Plasma Metabolome	607.162	0.0702667	row1872				positive	down_in_svn	NA	NA	NA
stool_microbiome	1	CAG.269.sp000431335	-0.0271483	0.289398	Higher in Case	0.00785669	Fecal Microbiome (Taxa)	NA	NA	NA	NA	NA	NA	NA	NA	NA	NA	NA
stool_microbiome	1	Prevotella.sp000434515	-0.0248533	0.311331	Higher in Case	0.00773759	Fecal Microbiome (Taxa)	NA	NA	NA	NA	NA	NA	NA	NA	NA	NA	NA
stool_gene	1	K03492	-0.0395017	0.179823	Higher in Case	0.0071033	Fecal Metagenome (Genes)	NA	NA	NA	NA	NA	NA	NA	NA	NA	NA	NA
stool_gene	1	K01134	0.0377201	-0.186249	Lower in Case	0.00702534	Fecal Metagenome (Genes)	NA	NA	NA	NA	NA	NA	NA	NA	NA	NA	NA
met_fecal	1	pos_2652	-0.0294283	0.238594	Higher in Case	0.00702142	Fecal Metabolome	261.16	1.2	row20				positive	up_in_svn	1.2	261.16	Unknown
stool_gene	1	K07059	-0.0401735	0.17257	Higher in Case	0.00693273	Fecal Metagenome (Genes)	NA	NA	NA	NA	NA	NA	NA	NA	NA	NA	NA
prot_nav	1	P01860	0.031887	-0.216408	Lower in Case	0.00690061	Plasma Proteome (Naive)	NA	NA	NA	NA	NA	NA	NA	NA	NA	NA	NA
met_pla	1	rLC_pos_mtb_1195285	0.0377356	-0.181012	Lower in Case	0.00683059	Plasma Metabolome	1072.92	0.0950667	row1181				positive	down_in_svn	NA	NA	NA
met_fecal	1	pos_1728	-0.0337092	0.19975	Higher in Case	0.00673342	Fecal Metabolome	204.196	3.48	row1352				positive	up_in_svn	3.48	204.196	Unknown
met_pla	1	rLC_neg_mtb_5677071	0.0381621	-0.172046	Lower in Case	0.00656564	Plasma Metabolome	192.022	0.754333	row5940				negative	down_in_svn	NA	NA	NA
prot_nav	1	Q6NX49	-0.0252366	0.257008	Higher in Case	0.00648601	Plasma Proteome (Naive)	NA	NA	NA	NA	NA	NA	NA	NA	NA	NA	NA
prot_nav	1	Q96KR1	-0.0542551	0.118693	Higher in Case	0.00643971	Plasma Proteome (Naive)	NA	NA	NA	NA	NA	NA	NA	NA	NA	NA	NA
met_vams	1	rLC_neg_mtb_3420218	-0.0216655	0.29678	Higher in Case	0.00642987	VAMS Metabolome	659.232	0.314133	row1666	E533	CE5783	Somatostatin fragment 3-14	negative	down_in_svn	NA	NA	NA
prot_dep	1	P07738	0.0477477	-0.13358	Lower in Case	0.00637814	Plasma Proteome (Depleted)	NA	NA	NA	NA	NA	NA	NA	NA	NA	NA	NA
stool_gene	1	K10121	0.044389	-0.143521	Lower in Case	0.00637076	Fecal Metagenome (Genes)	NA	NA	NA	NA	NA	NA	NA	NA	NA	NA	NA
prot_nav	1	P01042	0.0288484	-0.217113	Lower in Case	0.00626336	Plasma Proteome (Naive)	NA	NA	NA	NA	NA	NA	NA	NA	NA	NA	NA
stool_gene	1	3004670	-0.0380947	0.161516	Higher in Case	0.00615288	Fecal Metagenome (Genes)	NA	NA	NA	NA	NA	NA	NA	NA	NA	NA	NA
stool_gene	1	K06151	0.0529354	-0.112272	Lower in Case	0.00594318	Fecal Metagenome (Genes)	NA	NA	NA	NA	NA	NA	NA	NA	NA	NA	NA
stool_gene	1	3007049	0.0238658	-0.244709	Lower in Case	0.00584017	Fecal Metagenome (Genes)	NA	NA	NA	NA	NA	NA	NA	NA	NA	NA	NA
met_vams	1	rLC_neg_mtb_212031	-0.0253765	0.220861	Higher in Case	0.00560467	VAMS Metabolome	1014.52	0.0227333	row301				negative	up_in_svn	NA	NA	NA
met_fecal	1	pos_0826	-0.0231785	0.241145	Higher in Case	0.00558938	Fecal Metabolome	147.047	2.55	row1369				positive	up_in_svn	2.55	147.047	3-Coumaric acid
met_pla	1	rLC_pos_mtb_1192726	0.0298459	-0.182403	Lower in Case	0.00544399	Plasma Metabolome	908.915	0.0950667	row1579				positive	down_in_svn	NA	NA	NA
stool_microbiome	1	C941.sp004557565	-0.020361	0.266328	Higher in Case	0.00542271	Fecal Microbiome (Taxa)	NA	NA	NA	NA	NA	NA	NA	NA	NA	NA	NA
met_fecal	1	pos_1418	-0.0310982	0.174338	Higher in Case	0.0054216	Fecal Metabolome	186.113	6.01	row2666	E826	C05587;C07453	3-Methoxytyramine$Epinine; Deoxyepinephrine	positive	up_in_svn	6.01	186.113	5-Oxo-1-propyl-2-pyrrolidineacetic acid
prot_nav	1	P02774	0.035221	-0.15375	Lower in Case	0.00541522	Plasma Proteome (Naive)	NA	NA	NA	NA	NA	NA	NA	NA	NA	NA	NA
met_vams	1	rLC_neg_mtb_6036582	0.021463	-0.251664	Lower in Case	0.00540147	VAMS Metabolome	186.103	0.580733	row3396				negative	down_in_svn	NA	NA	NA
met_pla	1	rLC_pos_mtb_402305	0.0311127	-0.172343	Lower in Case	0.00536205	Plasma Metabolome	960.166	0.0248	row787				positive	down_in_svn	NA	NA	NA
met_vams	1	rLC_neg_mtb_2270681	-0.0336065	0.154588	Higher in Case	0.00519518	VAMS Metabolome	786.006	0.221133	row1750				negative	up_in_svn	NA	NA	NA
clinical	1	season_lean	0.0473493	-0.106392	Lower in Case	0.00503758	Clinical	NA	NA	NA	NA	NA	NA	NA	NA	NA	NA	NA
met_vams	1	rLC_neg_mtb_3442733	-0.0159784	0.305073	Higher in Case	0.00487458	VAMS Metabolome	729.235	0.3162	row8735				negative	down_in_svn	NA	NA	NA
prot_dep	1	O43490	0.0348998	-0.132308	Lower in Case	0.00461753	Plasma Proteome (Depleted)	NA	NA	NA	NA	NA	NA	NA	NA	NA	NA	NA
prot_nav	1	P06312	-0.0339384	0.134573	Higher in Case	0.0045672	Plasma Proteome (Naive)	NA	NA	NA	NA	NA	NA	NA	NA	NA	NA	NA
prot_nav	1	Q5T124	0.0175757	-0.255642	Lower in Case	0.00449308	Plasma Proteome (Naive)	NA	NA	NA	NA	NA	NA	NA	NA	NA	NA	NA
prot_dep	1	O75882	0.0217599	-0.201026	Lower in Case	0.0043743	Plasma Proteome (Depleted)	NA	NA	NA	NA	NA	NA	NA	NA	NA	NA	NA
met_vams	1	rLC_neg_mtb_220564	-0.0139813	0.305594	Higher in Case	0.00427261	VAMS Metabolome	1234.62	0.0372	row1071				negative	up_in_svn	NA	NA	NA
prot_nav	1	O95445	0.0156772	-0.261475	Lower in Case	0.00409918	Plasma Proteome (Naive)	NA	NA	NA	NA	NA	NA	NA	NA	NA	NA	NA
prot_dep	1	P05156	-0.0188728	0.207254	Higher in Case	0.00391147	Plasma Proteome (Depleted)	NA	NA	NA	NA	NA	NA	NA	NA	NA	NA	NA
prot_dep	1	Q5VYJ5	0.0205345	-0.183363	Lower in Case	0.00376527	Plasma Proteome (Depleted)	NA	NA	NA	NA	NA	NA	NA	NA	NA	NA	NA
prot_nav	1	P01009	0.024864	-0.147834	Lower in Case	0.00367575	Plasma Proteome (Naive)	NA	NA	NA	NA	NA	NA	NA	NA	NA	NA	NA
met_vams	1	rLC_pos_mtb_2943730	0.0168745	-0.217131	Lower in Case	0.00366397	VAMS Metabolome	289.124	0.208733	row500	E267	C00327	L-Citrulline; 2-Amino-5-ureidovaleric acid; Citrulline	positive	down_in_svn	NA	NA	NA
prot_fecal	1	O15204-2	-0.0581544	0.0602004	Higher in Case	0.00350092	Fecal Proteome	NA	NA	NA	NA	NA	NA	NA	NA	NA	NA	NA
met_fecal	1	pos_4554	-0.0191891	0.162171	Higher in Case	0.0031119	Fecal Metabolome	410.326	1.41	row1888				positive	up_in_svn	1.41	410.326	Unknown
prot_dep	1	P20774	0.0155114	-0.190417	Lower in Case	0.00295362	Plasma Proteome (Depleted)	NA	NA	NA	NA	NA	NA	NA	NA	NA	NA	NA
met_fecal	1	pos_1014	-0.00978801	0.298616	Higher in Case	0.00292285	Fecal Metabolome	160.133	5.93	row471				positive	up_in_svn	5.93	160.133	DL-2-Aminocaprylic acid
prot_dep	1	Q9C098	0.0215082	-0.128705	Lower in Case	0.00276821	Plasma Proteome (Depleted)	NA	NA	NA	NA	NA	NA	NA	NA	NA	NA	NA
met_vams	1	rLC_neg_mtb_5383910	-0.00955037	0.287356	Higher in Case	0.00274436	VAMS Metabolome	1247.14	0.506333	row6872				negative	down_in_svn	NA	NA	NA
stool_microbiome	1	Faecalibacterium.prausnitzii_C	0.0072762	-0.353271	Lower in Case	0.00257047	Fecal Microbiome (Taxa)	NA	NA	NA	NA	NA	NA	NA	NA	NA	NA	NA
met_vams	1	rLC_neg_mtb_249395	-0.0117225	0.216555	Higher in Case	0.00253857	VAMS Metabolome	1524.99	0.0330667	row404				negative	up_in_svn	NA	NA	NA
stool_microbiome	1	UMGS874.sp900546315	0.0111911	-0.222843	Lower in Case	0.00249385	Fecal Microbiome (Taxa)	NA	NA	NA	NA	NA	NA	NA	NA	NA	NA	NA
stool_microbiome	1	Unknown_Bulleidia.1	-0.0118857	0.198888	Higher in Case	0.00236392	Fecal Microbiome (Taxa)	NA	NA	NA	NA	NA	NA	NA	NA	NA	NA	NA
met_vams	1	rLC_neg_mtb_1279913	0.0156881	-0.14779	Lower in Case	0.00231855	VAMS Metabolome	595.177	0.132267	row7521				negative	down_in_svn	NA	NA	NA
met_vams	1	rLC_neg_mtb_4282792	-0.0103002	0.224005	Higher in Case	0.0023073	VAMS Metabolome	334.224	0.388533	row2560				negative	up_in_svn	NA	NA	NA
met_vams	1	rLC_neg_mtb_1108551	0.0128509	-0.17937	Lower in Case	0.00230506	VAMS Metabolome	301.055	0.1054	row1409				negative	down_in_svn	NA	NA	NA
met_fecal	1	pos_2911	0.00861676	-0.222034	Lower in Case	0.00191321	Fecal Metabolome	277.103	8.76	row562				positive	down_in_svn	8.76	277.103	L-.gamma.-Glutamyl-L-glutamic acid
met_vams	1	rLC_neg_mtb_5156991	-0.0121761	0.152222	Higher in Case	0.00185346	VAMS Metabolome	1690.77	465	row5707	E1597;E1787	C01165;C01157;C00430;C03440;C01110;C00385	L-Glutamate 5-semialdehyde; L-Glutamate gamma-semialdehyde$trans-4-Hydroxy-L-proline$5-Aminolevulinate; 5-Amino-4-oxopentanoate; 5-Amino-4-oxovaleric acid$cis-4-Hydroxy-D-proline$5-Amino-2-oxopentanoic acid; 5-Amino-2-oxopentanoate; 2-Oxo-5-amino-pentanoate; 2-Oxo-5-aminopentanoate; alpha-Keto-delta-aminopentanoate; 2-Oxo-5-aminovalerate;Xanthine	negative	down_in_svn	NA	NA	NA
met_fecal	1	pos_1042	-0.00526457	0.350167	Higher in Case	0.00184348	Fecal Metabolome	162.055	1.48	row614	E589;E595	C05639;CE5536;C01586	4,6-Dihydroxyquinoline; Quinoline-4,6-diol;adrenochrome$Hippurate; Hippuric acid; N-Benzoylglycine; Benzoylaminoacetic acid	positive	up_in_svn	1.48	162.055	Quinoline-2,8-diol
stool_gene	1	K18926	0.00689531	-0.261612	Lower in Case	0.00180389	Fecal Metagenome (Genes)	NA	NA	NA	NA	NA	NA	NA	NA	NA	NA	NA
met_fecal	1	pos_2740	0.00959945	-0.183853	Lower in Case	0.00176489	Fecal Metabolome	267.013	9.75	row3162				positive	down_in_svn	9.75	267.013	w/o MS2:Bauerine C
prot_dep	1	Q96N11	0.00546643	-0.281684	Lower in Case	0.00153981	Plasma Proteome (Depleted)	NA	NA	NA	NA	NA	NA	NA	NA	NA	NA	NA
met_fecal	1	pos_3407	-0.00534766	0.241682	Higher in Case	0.00129243	Fecal Metabolome	309.206	1.06	row2210				positive	up_in_svn	1.06	309.206	Unknown
prot_dep	1	Q86YH2	0.011769	-0.10601	Lower in Case	0.00124764	Plasma Proteome (Depleted)	NA	NA	NA	NA	NA	NA	NA	NA	NA	NA	NA
met_vams	1	rLC_neg_mtb_238386	0.00441054	-0.280712	Lower in Case	0.00123809	VAMS Metabolome	1018.6	0.0186	row8739				negative	down_in_svn	NA	NA	NA
stool_gene	1	Blon_2173	0.00919237	-0.127096	Lower in Case	0.00116831	Fecal Metagenome (Genes)	NA	NA	NA	NA	NA	NA	NA	NA	NA	NA	NA
prot_dep	1	P09172	0.00643456	-0.174856	Lower in Case	0.00112512	Plasma Proteome (Depleted)	NA	NA	NA	NA	NA	NA	NA	NA	NA	NA	NA
prot_dep	1	P00739	-0.00419148	0.213581	Higher in Case	0.000895222	Plasma Proteome (Depleted)	NA	NA	NA	NA	NA	NA	NA	NA	NA	NA	NA
met_pla	1	rLC_neg_mtb_3421104	-0.00217273	0.338065	Higher in Case	0.000734524	Plasma Metabolome	760.466	0.400933	row2705				negative	up_in_svn	NA	NA	NA
met_vams	1	rLC_neg_mtb_3711998	-0.00241925	0.267435	Higher in Case	0.000646991	VAMS Metabolome	583.352	0.343067	row1601				negative	up_in_svn	NA	NA	NA
prot_nav	1	P00736	0.00407555	-0.156889	Lower in Case	0.00063941	Plasma Proteome (Naive)	NA	NA	NA	NA	NA	NA	NA	NA	NA	NA	NA
met_pla	1	rLC_pos_mtb_179696	0.00527731	-0.120873	Lower in Case	0.000637884	Plasma Metabolome	162.066	0.0227333	row412	E4;E8;E351	C00785;C03680;C00135	Urocanate;4-Imidazolone-5-propanoate;L-Histidine	positive	down_in_svn	NA	NA	NA
met_pla	1	rLC_pos_mtb_402294	0.00459556	-0.136434	Lower in Case	0.00062699	Plasma Metabolome	959.165	0.0227333	row1034				positive	down_in_svn	NA	NA	NA
stool_gene	1	K06143	0.00217078	-0.245406	Lower in Case	0.000532723	Fecal Metagenome (Genes)	NA	NA	NA	NA	NA	NA	NA	NA	NA	NA	NA
met_fecal	1	pos_3918	-0.00218252	0.19333	Higher in Case	0.000421946	Fecal Metabolome	349.212	1.42	row2174				positive	up_in_svn	1.42	349.212	Unknown
met_vams	1	rLC_neg_mtb_3457595	-0.00197836	0.138635	Higher in Case	0.00027427	VAMS Metabolome	275.057	0.326533	row2647	E1169	C02325	Sinapyl alcohol; Sinapoyl alcohol	negative	up_in_svn	NA	NA	NA
met_fecal	1	pos_0279	0.00102256	-0.265186	Lower in Case	0.000271169	Fecal Metabolome	104.071	5.36	row2641	E108	C02356;C01026;C00334;C05145;C01205;C03284	(S)-2-Aminobutanoate; (S)-2-Aminobutanoic acid; (S)-2-Aminobutyric acid$N,N-Dimethylglycine; Dimethylglycine$4-Aminobutanoate$3-Aminoisobutyric acid; 3-Aminoisobutanoate; 3-Amino-2-methylpropanoate$D-3-Amino-isobutanoate$L-3-Amino-isobutanoate	positive	down_in_svn	5.36	104.071	2-Aminoisobutyric acid
met_fecal	1	pos_2082	-0.000800353	0.280243	Higher in Case	0.000224293	Fecal Metabolome	227.128	2.21	row1070				positive	up_in_svn	2.21	227.128	Unknown
prot_nav	1	Q15166	-0.000789772	0.20567	Higher in Case	0.000162432	Plasma Proteome (Naive)	NA	NA	NA	NA	NA	NA	NA	NA	NA	NA	NA
prot_fecal	1	O15496	0.00134153	-0.109377	Lower in Case	0.000146733	Fecal Proteome	NA	NA	NA	NA	NA	NA	NA	NA	NA	NA	NA
stool_gene	1	K23993	-0.00086825	0.108891	Higher in Case	9.45444e-05	Fecal Metagenome (Genes)	NA	NA	NA	NA	NA	NA	NA	NA	NA	NA	NA
stool_gene	1	K07498	1.39611e-05	-0.0989052	Lower in Case	1.38083e-06	Fecal Metagenome (Genes)	NA	NA	NA	NA	NA	NA	NA	NA	NA	NA	NA

## Sheet: diablo_output_comp2
block	comp	feature	loading	corr_case	direction	score	block_label	mz	rt	mummi_input_row	mummi_EID	mummi_compounds	mummi_compound_names	mummi_ion_mode	mummi_direction	RT	MZ	annotation
clinical	2	HH_food_insecurity	-0.753717	0.253918	Higher in Case	0.191382	Clinical	NA	NA	NA	NA	NA	NA	NA	NA	NA	NA	NA
prot_fecal	2	P02766	0.468385	-0.350833	Lower in Case	0.164325	Fecal Proteome	NA	NA	NA	NA	NA	NA	NA	NA	NA	NA	NA
prot_fecal	2	Q6P1J6	0.341894	-0.389211	Lower in Case	0.133069	Fecal Proteome	NA	NA	NA	NA	NA	NA	NA	NA	NA	NA	NA
clinical	2	impr_water	0.50068	-0.234663	Lower in Case	0.117491	Clinical	NA	NA	NA	NA	NA	NA	NA	NA	NA	NA	NA
met_fecal	2	pos_1492	-0.32538	0.298655	Higher in Case	0.0971763	Fecal Metabolome	190.107	8.07	row1920				positive	down_in_svn	8.07	190.107	Unknown
met_fecal	2	pos_0766	-0.319456	0.296978	Higher in Case	0.0948713	Fecal Metabolome	144.048	6.71	row82				positive	up_in_svn	6.71	144.048	1,5-Isoquinolinediol
stool_scfa	2	Valerate	-0.610223	0.137385	Higher in Case	0.0838353	Fecal SCFAs	NA	NA	NA	NA	NA	NA	NA	NA	NA	NA	NA
prot_nav	2	Q96KN2	0.300282	-0.273753	Lower in Case	0.0822031	Plasma Proteome (Naive)	NA	NA	NA	NA	NA	NA	NA	NA	NA	NA	NA
prot_fecal	2	P09210	0.315589	-0.257143	Lower in Case	0.0811514	Fecal Proteome	NA	NA	NA	NA	NA	NA	NA	NA	NA	NA	NA
met_fecal	2	pos_2245	0.310528	-0.25477	Lower in Case	0.0791132	Fecal Metabolome	237.17	1.14	row31				positive	down_in_svn	1.14	237.17	Unknown
stool_microbiome	2	ER4.sp900552015	-0.395545	0.197753	Higher in Case	0.07822	Fecal Microbiome (Taxa)	NA	NA	NA	NA	NA	NA	NA	NA	NA	NA	NA
met_vams	2	rLC_neg_mtb_4474926	-0.286328	0.262577	Higher in Case	0.0751833	VAMS Metabolome	234.047	0.4154	row4936				negative	up_in_svn	NA	NA	NA
met_pla	2	rLC_neg_mtb_3520367	0.233723	-0.314231	Lower in Case	0.0734432	Plasma Metabolome	669.485	0.388533	row143				negative	down_in_svn	NA	NA	NA
stool_microbiome	2	CAG.83.sp900549395	-0.309544	0.229862	Higher in Case	0.0711522	Fecal Microbiome (Taxa)	NA	NA	NA	NA	NA	NA	NA	NA	NA	NA	NA
met_pla	2	rLC_neg_mtb_4227554	0.282868	-0.251486	Lower in Case	0.0711375	Plasma Metabolome	162.043	0.5084	row1971				negative	down_in_svn	NA	NA	NA
prot_nav	2	Q9C0E2	0.261489	-0.268374	Lower in Case	0.0701768	Plasma Proteome (Naive)	NA	NA	NA	NA	NA	NA	NA	NA	NA	NA	NA
prot_dep	2	P41222	-0.392355	0.171213	Higher in Case	0.0671764	Plasma Proteome (Depleted)	NA	NA	NA	NA	NA	NA	NA	NA	NA	NA	NA
prot_dep	2	P00751	-0.407476	0.163316	Higher in Case	0.0665475	Plasma Proteome (Depleted)	NA	NA	NA	NA	NA	NA	NA	NA	NA	NA	NA
met_pla	2	rLC_neg_mtb_205231	-0.208277	0.312784	Higher in Case	0.0651455	Plasma Metabolome	112.986	0.0372	row3418				negative	up_in_svn	NA	NA	NA
prot_dep	2	Q96KN2	0.282491	-0.221389	Lower in Case	0.0625405	Plasma Proteome (Depleted)	NA	NA	NA	NA	NA	NA	NA	NA	NA	NA	NA
met_vams	2	rLC_neg_mtb_1273460	-0.378127	-0.164008	Lower in Case	0.0620158	VAMS Metabolome	189.002	0.140533	row2203				negative	down_in_svn	NA	NA	NA
stool_scfa	2	Isobutyrate	-0.411145	-0.146996	Lower in Case	0.0604369	Fecal SCFAs	NA	NA	NA	NA	NA	NA	NA	NA	NA	NA	NA
met_pla	2	rLC_neg_mtb_112244	0.21103	-0.280761	Lower in Case	0.059249	Plasma Metabolome	454.996	0.0124	row2188				negative	up_in_svn	NA	NA	NA
met_fecal	2	pos_1428	0.288059	-0.20419	Lower in Case	0.0588187	Fecal Metabolome	186.222	1.14	row34				positive	down_in_svn	1.14	186.222	Unknown
met_pla	2	rLC_neg_mtb_3748737	-0.424833	0.137997	Higher in Case	0.0586255	Plasma Metabolome	265.033	0.444333	row1421				negative	up_in_svn	NA	NA	NA
prot_nav	2	Q08380	-0.234462	0.249468	Higher in Case	0.0584909	Plasma Proteome (Naive)	NA	NA	NA	NA	NA	NA	NA	NA	NA	NA	NA
stool_microbiome	2	Unknown_Faecalibacterium.16	0.181932	-0.319074	Lower in Case	0.0580499	Fecal Microbiome (Taxa)	NA	NA	NA	NA	NA	NA	NA	NA	NA	NA	NA
stool_microbiome	2	Oscillibacter.sp004553545	-0.327982	0.174428	Higher in Case	0.0572091	Fecal Microbiome (Taxa)	NA	NA	NA	NA	NA	NA	NA	NA	NA	NA	NA
met_fecal	2	pos_2139	-0.368786	0.155033	Higher in Case	0.0571741	Fecal Metabolome	230.223	7.14	row113				positive	up_in_svn	7.14	230.223	Unknown
met_fecal	2	pos_0935	-0.156379	0.357659	Higher in Case	0.0559303	Fecal Metabolome	155.082	7.08	row4				positive	up_in_svn	7.08	155.082	Unknown
met_vams	2	rLC_neg_mtb_4086147	0.161951	-0.328894	Lower in Case	0.0532646	VAMS Metabolome	1219.24	372	row1248				negative	down_in_svn	NA	NA	NA
met_pla	2	rLC_neg_mtb_4144427	0.316164	-0.159332	Lower in Case	0.0503749	Plasma Metabolome	1175.77	0.524933	row6147				negative	down_in_svn	NA	NA	NA
met_fecal	2	pos_0894	-0.198465	0.244617	Higher in Case	0.0485478	Fecal Metabolome	152.071	7.75	row243	E282;E313;E376;E1043	C00534;C05548;C00547;C00314;CE5665	Pyridoxamine;6-Acetamido-2-oxohexanoate; 2-Oxo-6-acetamidocaproate;Norepinephrine$Pyridoxine;leukoaminochrome	positive	up_in_svn	7.75	152.071	Unknown
prot_nav	2	P13473	-0.352873	0.136767	Higher in Case	0.0482614	Plasma Proteome (Naive)	NA	NA	NA	NA	NA	NA	NA	NA	NA	NA	NA
met_pla	2	rLC_neg_mtb_742689	-0.144389	0.32995	Higher in Case	0.0476412	Plasma Metabolome	203.035	0.103333	row990				negative	up_in_svn	NA	NA	NA
met_vams	2	rLC_neg_mtb_1541734	0.503522	-0.0938108	Lower in Case	0.0472358	VAMS Metabolome	188.021	155	row6953				negative	down_in_svn	NA	NA	NA
prot_dep	2	O95479	-0.235476	0.196162	Higher in Case	0.0461914	Plasma Proteome (Depleted)	NA	NA	NA	NA	NA	NA	NA	NA	NA	NA	NA
stool_microbiome	2	Unknown_Faecalibacterium.29	0.289574	-0.153106	Lower in Case	0.0443354	Fecal Microbiome (Taxa)	NA	NA	NA	NA	NA	NA	NA	NA	NA	NA	NA
met_fecal	2	pos_3008	0.174052	-0.24966	Lower in Case	0.0434538	Fecal Metabolome	284.099	6.95	row312	E54	C00387	Guanosine	positive	down_in_svn	6.95	284.099	Guanosine
clinical	2	m_bmiincl	-0.358243	-0.116493	Lower in Case	0.0417329	Clinical	NA	NA	NA	NA	NA	NA	NA	NA	NA	NA	NA
prot_dep	2	P37023	-0.294112	0.140973	Higher in Case	0.0414619	Plasma Proteome (Depleted)	NA	NA	NA	NA	NA	NA	NA	NA	NA	NA	NA
met_pla	2	rLC_neg_mtb_805750	0.177349	-0.232237	Lower in Case	0.0411872	Plasma Metabolome	412.113	0.1364	row1768				negative	down_in_svn	NA	NA	NA
prot_nav	2	P51797	-0.134703	0.304563	Higher in Case	0.0410254	Plasma Proteome (Naive)	NA	NA	NA	NA	NA	NA	NA	NA	NA	NA	NA
met_vams	2	rLC_neg_mtb_214798	0.210392	-0.19009	Lower in Case	0.0399934	VAMS Metabolome	1081.63	0.0206667	row1021				negative	up_in_svn	NA	NA	NA
prot_nav	2	P07996	-0.166042	0.237224	Higher in Case	0.039389	Plasma Proteome (Naive)	NA	NA	NA	NA	NA	NA	NA	NA	NA	NA	NA
met_pla	2	rLC_neg_mtb_2031037	0.247079	-0.158325	Lower in Case	0.0391188	Plasma Metabolome	283.061	0.233533	row4917				negative	up_in_svn	NA	NA	NA
prot_nav	2	P62495	-0.278713	0.137968	Higher in Case	0.0384534	Plasma Proteome (Naive)	NA	NA	NA	NA	NA	NA	NA	NA	NA	NA	NA
met_fecal	2	pos_0718	0.210408	-0.182657	Lower in Case	0.0384325	Fecal Metabolome	140.996	1.05	row173	E495	C00227	Acetyl phosphate	positive	down_in_svn	1.05	140.996	Unknown
met_pla	2	rLC_pos_mtb_3237250	0.120942	-0.317063	Lower in Case	0.0383462	Plasma Metabolome	816.569	0.243867	row1095				positive	down_in_svn	NA	NA	NA
met_pla	2	rLC_neg_mtb_743423	0.188737	-0.198311	Lower in Case	0.0374286	Plasma Metabolome	295.068	0.1054	row3434				negative	down_in_svn	NA	NA	NA
met_vams	2	rLC_neg_mtb_223891	0.1506	-0.246657	Lower in Case	0.0371467	VAMS Metabolome	1336.84	0	row2144				negative	down_in_svn	NA	NA	NA
stool_microbiome	2	Angelakisella.sp900547385	-0.189044	0.194662	Higher in Case	0.0367997	Fecal Microbiome (Taxa)	NA	NA	NA	NA	NA	NA	NA	NA	NA	NA	NA
prot_nav	2	P00738	-0.252216	0.144481	Higher in Case	0.0364404	Plasma Proteome (Naive)	NA	NA	NA	NA	NA	NA	NA	NA	NA	NA	NA
prot_dep	2	Q9UBX5	-0.25978	0.13885	Higher in Case	0.0360705	Plasma Proteome (Depleted)	NA	NA	NA	NA	NA	NA	NA	NA	NA	NA	NA
met_pla	2	rLC_neg_mtb_871709	0.203936	-0.173334	Lower in Case	0.0353491	Plasma Metabolome	379.069	0.121933	row394				negative	down_in_svn	NA	NA	NA
prot_fecal	2	Q01459	0.336488	-0.103109	Lower in Case	0.0346949	Fecal Proteome	NA	NA	NA	NA	NA	NA	NA	NA	NA	NA	NA
prot_fecal	2	P53007	-0.187233	0.184043	Higher in Case	0.0344589	Fecal Proteome	NA	NA	NA	NA	NA	NA	NA	NA	NA	NA	NA
prot_dep	2	P10124	-0.205973	0.1644	Higher in Case	0.033862	Plasma Proteome (Depleted)	NA	NA	NA	NA	NA	NA	NA	NA	NA	NA	NA
prot_fecal	2	Q9UNQ0-2	0.120971	-0.279869	Lower in Case	0.0338562	Fecal Proteome	NA	NA	NA	NA	NA	NA	NA	NA	NA	NA	NA
stool_gene	2	K18164	-0.173495	0.191643	Higher in Case	0.0332491	Fecal Metagenome (Genes)	NA	NA	NA	NA	NA	NA	NA	NA	NA	NA	NA
stool_microbiome	2	CAG.882.sp003486385	0.128498	-0.253936	Lower in Case	0.0326302	Fecal Microbiome (Taxa)	NA	NA	NA	NA	NA	NA	NA	NA	NA	NA	NA
prot_dep	2	Q10588	-0.257726	0.123391	Higher in Case	0.0318012	Plasma Proteome (Depleted)	NA	NA	NA	NA	NA	NA	NA	NA	NA	NA	NA
stool_gene	2	GH5_54	-0.203269	0.15436	Higher in Case	0.0313767	Fecal Metagenome (Genes)	NA	NA	NA	NA	NA	NA	NA	NA	NA	NA	NA
met_pla	2	rLC_neg_mtb_84735	0.238905	-0.129914	Lower in Case	0.031037	Plasma Metabolome	794.566	0.0062	row5799				negative	down_in_svn	NA	NA	NA
met_fecal	2	pos_1072	-0.154126	0.201232	Higher in Case	0.031015	Fecal Metabolome	164.071	1.19	row849	E395	C00082;CE2174	L-Tyrosine$	positive	up_in_svn	1.19	164.071	p-Acetaminobenzaldehyde
stool_gene	2	3002823	-0.195407	0.156479	Higher in Case	0.030577	Fecal Metagenome (Genes)	NA	NA	NA	NA	NA	NA	NA	NA	NA	NA	NA
prot_nav	2	A0M8Q6	0.230068	-0.132824	Lower in Case	0.0305586	Plasma Proteome (Naive)	NA	NA	NA	NA	NA	NA	NA	NA	NA	NA	NA
stool_gene	2	K20108	0.275594	-0.1084	Lower in Case	0.0298745	Fecal Metagenome (Genes)	NA	NA	NA	NA	NA	NA	NA	NA	NA	NA	NA
met_vams	2	rLC_neg_mtb_1271715	-0.311804	0.0950321	Higher in Case	0.0296314	VAMS Metabolome	105.036	0.119867	row1077				negative	down_in_svn	NA	NA	NA
met_fecal	2	pos_0812	0.118737	-0.248433	Lower in Case	0.0294982	Fecal Metabolome	146.118	3.05	row880	E166	C05543	3-Dehydroxycarnitine	positive	down_in_svn	3.05	146.118	L-Leucine, methyl ester
prot_dep	2	P01034	-0.209349	0.138729	Higher in Case	0.0290428	Plasma Proteome (Depleted)	NA	NA	NA	NA	NA	NA	NA	NA	NA	NA	NA
met_pla	2	rLC_neg_mtb_871949	0.137498	-0.20554	Lower in Case	0.0282613	Plasma Metabolome	394.105	0.113667	row2976				negative	down_in_svn	NA	NA	NA
prot_fecal	2	P40313	0.198243	-0.142298	Lower in Case	0.0282097	Fecal Proteome	NA	NA	NA	NA	NA	NA	NA	NA	NA	NA	NA
prot_nav	2	P00751	-0.499628	0.054367	Higher in Case	0.0271633	Plasma Proteome (Naive)	NA	NA	NA	NA	NA	NA	NA	NA	NA	NA	NA
stool_microbiome	2	Faecalibacterium.prausnitzii_G	0.323348	-0.0799409	Lower in Case	0.0258487	Fecal Microbiome (Taxa)	NA	NA	NA	NA	NA	NA	NA	NA	NA	NA	NA
met_fecal	2	pos_2522	-0.147709	0.170317	Higher in Case	0.0251573	Fecal Metabolome	253.252	1.04	row389	E584;E1153	C14762;C14826;C14825;C01595	13(S)-HODE; (13S)-Hydroxyoctadecadienoic acid; (9Z, 11E)-(13S)-13-Hydroxyoctadeca-9,11-dienoic acid$12(13)-EpOME; (12R,13S)-(9Z)-12,13-Epoxyoctadecenoic acid$9(10)-EpOME; (9R,10S)-(12Z)-9,10-Epoxyoctadecenoic acid;linoleic acid (all cis C18:2) n-6	positive	up_in_svn	1.04	253.252	Unknown
met_vams	2	rLC_neg_mtb_5245001	-0.129537	0.193539	Higher in Case	0.0250706	VAMS Metabolome	1376.44	465	row6858				negative	down_in_svn	NA	NA	NA
met_pla	2	rLC_neg_mtb_137536	0.104541	-0.239121	Lower in Case	0.0249978	Plasma Metabolome	291.715	0.0165333	row5024				negative	up_in_svn	NA	NA	NA
stool_gene	2	GH13_4	0.143741	-0.172558	Lower in Case	0.0248038	Fecal Metagenome (Genes)	NA	NA	NA	NA	NA	NA	NA	NA	NA	NA	NA
met_fecal	2	pos_4722	0.110958	-0.222337	Lower in Case	0.0246701	Fecal Metabolome	430.914	7.46	row249				positive	down_in_svn	7.46	430.914	Unknown
met_pla	2	rLC_neg_mtb_1083136	-0.161319	0.152069	Higher in Case	0.0245317	Plasma Metabolome	489.112	0.1426	row2676				negative	up_in_svn	NA	NA	NA
met_pla	2	rLC_neg_mtb_3966461	-0.0772048	0.314879	Higher in Case	0.0243102	Plasma Metabolome	215.038	0.460867	row220				negative	up_in_svn	NA	NA	NA
met_vams	2	rLC_neg_mtb_243662	0.143076	-0.165491	Lower in Case	0.0236777	VAMS Metabolome	1263.99	0.00206667	row4372				negative	down_in_svn	NA	NA	NA
stool_gene	2	K10979	-0.219376	0.107219	Higher in Case	0.0235213	Fecal Metagenome (Genes)	NA	NA	NA	NA	NA	NA	NA	NA	NA	NA	NA
stool_gene	2	K00803	-0.226695	0.10356	Higher in Case	0.0234765	Fecal Metagenome (Genes)	NA	NA	NA	NA	NA	NA	NA	NA	NA	NA	NA
met_fecal	2	pos_4337	0.137989	-0.168821	Lower in Case	0.0232955	Fecal Metabolome	388.182	8.44	row499	E1088	CE5139	12-oxo-20-dihydroxy-leukotriene B4	positive	down_in_svn	8.44	388.182	Unknown
met_pla	2	rLC_pos_mtb_1411459	-0.123299	0.188145	Higher in Case	0.0231981	Plasma Metabolome	800.985	0.113667	row974				positive	down_in_svn	NA	NA	NA
met_fecal	2	pos_2976	-0.139187	0.16642	Higher in Case	0.0231635	Fecal Metabolome	281.247	1.05	row783	E1153	C01595	linoleic acid (all cis C18:2) n-6	positive	up_in_svn	1.05	281.247	Unknown
met_vams	2	rLC_pos_mtb_3262253	-0.0966259	0.232053	Higher in Case	0.0224223	VAMS Metabolome	458.232	0.2356	row441	E245	CE2028	beta-hydroxy-beta-methylbutyrate	positive	down_in_svn	NA	NA	NA
met_pla	2	rLC_neg_mtb_4475755	-0.145755	0.153644	Higher in Case	0.0223944	Plasma Metabolome	163.041	0.5766	row68				negative	up_in_svn	NA	NA	NA
met_pla	2	rLC_neg_mtb_874486	0.119763	-0.183338	Lower in Case	0.0219571	Plasma Metabolome	561.146	0.115733	row4373	E2089	C05844	5-L-Glutamyl-taurine	negative	down_in_svn	NA	NA	NA
stool_gene	2	K00332	-0.130026	0.16742	Higher in Case	0.021769	Fecal Metagenome (Genes)	NA	NA	NA	NA	NA	NA	NA	NA	NA	NA	NA
prot_fecal	2	Q92485	0.25988	-0.0813205	Lower in Case	0.0211335	Fecal Proteome	NA	NA	NA	NA	NA	NA	NA	NA	NA	NA	NA
stool_microbiome	2	UBA738.sp003522945	-0.312626	0.0663914	Higher in Case	0.0207557	Fecal Microbiome (Taxa)	NA	NA	NA	NA	NA	NA	NA	NA	NA	NA	NA
met_fecal	2	pos_3635	0.0919096	-0.214898	Lower in Case	0.0197512	Fecal Metabolome	327.141	6.13	row3171				positive	down_in_svn	6.13	327.141	Unknown
met_pla	2	rLC_neg_mtb_3309678	-0.0708746	0.275167	Higher in Case	0.0195024	Plasma Metabolome	597.392	0.374067	row783				negative	up_in_svn	NA	NA	NA
met_fecal	2	pos_2683	-0.217886	0.0877582	Higher in Case	0.0191213	Fecal Metabolome	263.236	1.04	row2858	E1153;E2290	C01595;C00517	linoleic acid (all cis C18:2) n-6;Hexadecanal	positive	up_in_svn	1.04	263.236	Unknown
stool_gene	2	3002911	-0.148837	0.127728	Higher in Case	0.0190105	Fecal Metagenome (Genes)	NA	NA	NA	NA	NA	NA	NA	NA	NA	NA	NA
met_pla	2	rLC_neg_mtb_459197	-0.0997901	0.190176	Higher in Case	0.0189777	Plasma Metabolome	496.048	0.0682	row1696				negative	up_in_svn	NA	NA	NA
met_pla	2	rLC_neg_mtb_787111	0.189661	-0.099408	Lower in Case	0.0188538	Plasma Metabolome	466.086	0.109533	row2041				negative	down_in_svn	NA	NA	NA
stool_gene	2	K05991	-0.144033	0.12953	Higher in Case	0.0186566	Fecal Metagenome (Genes)	NA	NA	NA	NA	NA	NA	NA	NA	NA	NA	NA
met_pla	2	rLC_neg_mtb_3150937	0.129971	-0.142876	Lower in Case	0.0185698	Plasma Metabolome	219.028	0.3348	row3056	E883;E896;E1806	C00031;C00221;C02336;C00267;C00962;C00795;C00137;C00984;C00159;C13747;C07480;C00700	D-Glucose$beta-D-Glucose$beta-D-Fructose; beta-Fruit sugar; beta-D-arabino-Hexulose; beta-Levulose; Fructose$alpha-D-Glucose$beta-D-Galactose$D-Tagatose; lyxo-Hexulose$myo-Inositol$alpha-D-Galactose$D-Mannose;1,7-Dimethylxanthine; Paraxanthine$;XTP	negative	up_in_svn	NA	NA	NA
met_fecal	2	pos_3564	-0.141604	0.127899	Higher in Case	0.0181111	Fecal Metabolome	321.24	1.05	row1026	E1151;E1549;E1570;E1840	C05472;C14774;C14775;C14772;C14773;C05487;C05475;C05478;C04805;C04742;C14749;C14748;C14778;C14770;C14771;C14769;C14768;CE5016	Urocortisol; 5beta-Pregnane-3alpha,11beta,17alpha,21-tetrol-20-one;11,12-DHET$14,15-DHET; (5Z,8Z,11Z)-14,15-Dihydroxyeicosa-5,8,11-trienoic acid; (5Z,8Z,11Z)-14,15-Dihydroxyicosa-5,8,11-trienoic acid$5,6-DHET; (8Z,11Z,14Z)-5,6-Dihydroxyeicosa-8,11,14-trienoic acid; (8Z,11Z,14Z)-5,6-Dihydroxyicosa-8,11,14-trienoic acid$8,9-DHET; (5Z,11Z,14Z)-8,9-Dihydroxyeicosa-5,11,14-trienoic acid; (5Z,11Z,14Z)-…	positive	up_in_svn	1.05	321.24	Unknown
prot_dep	2	Q5JSL3	0.201304	-0.0895617	Lower in Case	0.0180292	Plasma Proteome (Depleted)	NA	NA	NA	NA	NA	NA	NA	NA	NA	NA	NA
met_pla	2	rLC_neg_mtb_3760410	0.147448	-0.121781	Lower in Case	0.0179564	Plasma Metabolome	399.334	0.4402	row4044				negative	down_in_svn	NA	NA	NA
met_pla	2	rLC_neg_mtb_849299	0.0803301	-0.220764	Lower in Case	0.017734	Plasma Metabolome	447.032	0.113667	row6014				negative	down_in_svn	NA	NA	NA
prot_fecal	2	P13164	-0.0831033	0.201301	Higher in Case	0.0167288	Fecal Proteome	NA	NA	NA	NA	NA	NA	NA	NA	NA	NA	NA
met_fecal	2	pos_0474	-0.0377085	0.425889	Higher in Case	0.0160596	Fecal Metabolome	122.071	6.71	row29				positive	up_in_svn	6.71	122.071	Unknown
met_vams	2	rLC_neg_mtb_214086	0.0590349	-0.26811	Lower in Case	0.0158278	VAMS Metabolome	1064.21	0.0248	row9908				negative	down_in_svn	NA	NA	NA
met_fecal	2	pos_1315	-0.172158	0.0915008	Higher in Case	0.0157526	Fecal Metabolome	180.088	7.39	row2152	E1606	C00329	D-Glucosamine	positive	up_in_svn	7.39	180.088	Unknown
stool_scfa	2	Isovalerate	-0.658262	-0.0239298	Lower in Case	0.0157521	Fecal SCFAs	NA	NA	NA	NA	NA	NA	NA	NA	NA	NA	NA
met_vams	2	rLC_neg_mtb_5432687	0.0640849	-0.236644	Lower in Case	0.0151653	VAMS Metabolome	1447.02	496	row4218				negative	down_in_svn	NA	NA	NA
met_vams	2	rLC_neg_mtb_1478611	0.111216	-0.136154	Lower in Case	0.0151425	VAMS Metabolome	317.107	0.140533	row256				negative	down_in_svn	NA	NA	NA
prot_fecal	2	O00584	0.103402	-0.146226	Lower in Case	0.01512	Fecal Proteome	NA	NA	NA	NA	NA	NA	NA	NA	NA	NA	NA
prot_nav	2	Q86TG7	0.214213	-0.0700996	Lower in Case	0.0150163	Plasma Proteome (Naive)	NA	NA	NA	NA	NA	NA	NA	NA	NA	NA	NA
met_vams	2	rLC_neg_mtb_4332193	0.0570336	-0.262283	Lower in Case	0.014959	VAMS Metabolome	502.303	0.388533	row1514				negative	down_in_svn	NA	NA	NA
stool_gene	2	K01971	-0.169694	0.0876935	Higher in Case	0.014881	Fecal Metagenome (Genes)	NA	NA	NA	NA	NA	NA	NA	NA	NA	NA	NA
met_vams	2	rLC_neg_mtb_4035461	0.0441858	-0.335718	Lower in Case	0.014834	VAMS Metabolome	990.576	0.369933	row2134				negative	down_in_svn	NA	NA	NA
prot_fecal	2	Q92484	0.476319	-0.0306125	Lower in Case	0.0145813	Fecal Proteome	NA	NA	NA	NA	NA	NA	NA	NA	NA	NA	NA
met_vams	2	rLC_neg_mtb_3555711	0.155643	-0.0929348	Lower in Case	0.0144646	VAMS Metabolome	329.186	0.330667	row410				negative	down_in_svn	NA	NA	NA
met_pla	2	rLC_neg_mtb_3305891	-0.0806639	0.178231	Higher in Case	0.0143768	Plasma Metabolome	205.161	0.351333	row5635				negative	up_in_svn	NA	NA	NA
stool_gene	2	K21672	-0.0907764	-0.148402	Lower in Case	0.0134714	Fecal Metagenome (Genes)	NA	NA	NA	NA	NA	NA	NA	NA	NA	NA	NA
met_vams	2	rLC_pos_mtb_846352	0.100683	-0.130121	Lower in Case	0.0131009	VAMS Metabolome	107.066	62	row1591				positive	down_in_svn	NA	NA	NA
prot_nav	2	Q9NZP8	-0.18548	0.0689793	Higher in Case	0.0127942	Plasma Proteome (Naive)	NA	NA	NA	NA	NA	NA	NA	NA	NA	NA	NA
stool_gene	2	K21400	-0.0819208	-0.155925	Lower in Case	0.0127735	Fecal Metagenome (Genes)	NA	NA	NA	NA	NA	NA	NA	NA	NA	NA	NA
met_vams	2	rLC_neg_mtb_217717	0.078552	-0.162244	Lower in Case	0.0127446	VAMS Metabolome	1156.76	0.0351333	row3779				negative	up_in_svn	NA	NA	NA
met_fecal	2	pos_3329	0.0498952	-0.255364	Lower in Case	0.0127414	Fecal Metabolome	304.161	9.55	row2592				positive	down_in_svn	9.55	304.161	Arg-Glu
stool_gene	2	GH5_56	0.158477	-0.0799335	Lower in Case	0.0126676	Fecal Metagenome (Genes)	NA	NA	NA	NA	NA	NA	NA	NA	NA	NA	NA
prot_dep	2	P10451	-0.0748515	0.168417	Higher in Case	0.0126063	Plasma Proteome (Depleted)	NA	NA	NA	NA	NA	NA	NA	NA	NA	NA	NA
met_vams	2	rLC_neg_mtb_1086350	-0.181074	0.068402	Higher in Case	0.0123859	VAMS Metabolome	189.038	0.119867	row4287				negative	up_in_svn	NA	NA	NA
stool_gene	2	K25155	-0.209555	0.0581766	Higher in Case	0.0121912	Fecal Metagenome (Genes)	NA	NA	NA	NA	NA	NA	NA	NA	NA	NA	NA
stool_gene	2	K17899	-0.0859523	-0.141047	Lower in Case	0.0121234	Fecal Metagenome (Genes)	NA	NA	NA	NA	NA	NA	NA	NA	NA	NA	NA
stool_gene	2	3002949	-0.0908034	-0.13223	Lower in Case	0.012007	Fecal Metagenome (Genes)	NA	NA	NA	NA	NA	NA	NA	NA	NA	NA	NA
prot_nav	2	P01024	-0.11783	0.101883	Higher in Case	0.0120049	Plasma Proteome (Naive)	NA	NA	NA	NA	NA	NA	NA	NA	NA	NA	NA
met_fecal	2	pos_3374	0.0401086	-0.295929	Lower in Case	0.0118693	Fecal Metabolome	307.044	6.11	row683	E937	C00294	Inosine	positive	down_in_svn	6.11	307.044	Unknown
prot_dep	2	P01011	-0.143888	0.0820056	Higher in Case	0.0117996	Plasma Proteome (Depleted)	NA	NA	NA	NA	NA	NA	NA	NA	NA	NA	NA
met_fecal	2	pos_0411	0.050469	-0.231728	Lower in Case	0.0116951	Fecal Metabolome	116.107	1.04	row71				positive	down_in_svn	1.04	116.107	trans-4-Aminocyclohexanol
met_fecal	2	pos_1683	-0.108543	0.106283	Higher in Case	0.0115363	Fecal Metabolome	202.144	1.37	row2634				positive	up_in_svn	1.37	202.144	Unknown
met_pla	2	rLC_neg_mtb_877267	0.0610791	-0.186905	Lower in Case	0.011416	Plasma Metabolome	752.194	0.119867	row3094				negative	down_in_svn	NA	NA	NA
met_pla	2	rLC_neg_mtb_645068	-0.0641257	0.176302	Higher in Case	0.0113055	Plasma Metabolome	331.043	0.1116	row2792				negative	up_in_svn	NA	NA	NA
met_pla	2	rLC_neg_mtb_16891	0.0415464	-0.271422	Lower in Case	0.0112766	Plasma Metabolome	400.995	0	row48				negative	down_in_svn	NA	NA	NA
stool_gene	2	K18983	-0.0678901	0.165047	Higher in Case	0.0112051	Fecal Metagenome (Genes)	NA	NA	NA	NA	NA	NA	NA	NA	NA	NA	NA
stool_gene	2	K20748	-0.0884359	0.126549	Higher in Case	0.0111915	Fecal Metagenome (Genes)	NA	NA	NA	NA	NA	NA	NA	NA	NA	NA	NA
met_fecal	2	pos_2025	0.0739522	-0.150397	Lower in Case	0.0111222	Fecal Metabolome	224.113	7.97	row1662	E424;E431	C00272;C00559;C05198	Tetrahydrobiopterin;Deoxyadenosine$5'-Deoxyadenosine	positive	up_in_svn	7.97	224.113	N-Acetyl-D-galactosaminitol
stool_gene	2	K10672	-0.116159	-0.0956128	Lower in Case	0.0111063	Fecal Metagenome (Genes)	NA	NA	NA	NA	NA	NA	NA	NA	NA	NA	NA
stool_gene	2	K16881	-0.0705703	-0.157297	Lower in Case	0.0111005	Fecal Metagenome (Genes)	NA	NA	NA	NA	NA	NA	NA	NA	NA	NA	NA
met_fecal	2	pos_0981	0.119084	-0.0931077	Lower in Case	0.0110877	Fecal Metabolome	158.154	5.26	row1237				positive	up_in_svn	5.26	158.154	Unknown
met_fecal	2	pos_0855	0.19274	-0.0570179	Lower in Case	0.0109896	Fecal Metabolome	149.117	1.14	row2869				positive	down_in_svn	1.14	149.117	Unknown
stool_gene	2	K09726	-0.102575	-0.105815	Lower in Case	0.010854	Fecal Metagenome (Genes)	NA	NA	NA	NA	NA	NA	NA	NA	NA	NA	NA
stool_gene	2	3006874	-0.100396	0.107257	Higher in Case	0.0107681	Fecal Metagenome (Genes)	NA	NA	NA	NA	NA	NA	NA	NA	NA	NA	NA
met_vams	2	rLC_neg_mtb_1356689	-0.0391171	0.274195	Higher in Case	0.0107257	VAMS Metabolome	363.107	0.132267	row3824				negative	up_in_svn	NA	NA	NA
prot_fecal	2	P07098-2	0.032477	-0.32388	Lower in Case	0.0105186	Fecal Proteome	NA	NA	NA	NA	NA	NA	NA	NA	NA	NA	NA
stool_gene	2	K01960	-0.183666	-0.0564523	Lower in Case	0.0103684	Fecal Metagenome (Genes)	NA	NA	NA	NA	NA	NA	NA	NA	NA	NA	NA
met_fecal	2	pos_5566	0.0491124	-0.209381	Lower in Case	0.0102832	Fecal Metabolome	570.458	1.11	row411				positive	down_in_svn	1.11	570.458	Unknown
stool_gene	2	K06378	-0.0860256	-0.11795	Lower in Case	0.0101467	Fecal Metagenome (Genes)	NA	NA	NA	NA	NA	NA	NA	NA	NA	NA	NA
stool_gene	2	K00298	-0.148752	-0.0680444	Lower in Case	0.0101218	Fecal Metagenome (Genes)	NA	NA	NA	NA	NA	NA	NA	NA	NA	NA	NA
stool_gene	2	K02250	-0.0416784	0.236893	Higher in Case	0.00987333	Fecal Metagenome (Genes)	NA	NA	NA	NA	NA	NA	NA	NA	NA	NA	NA
met_fecal	2	pos_0899	0.038729	-0.254178	Lower in Case	0.00984407	Fecal Metabolome	152.128	1.14	row17				positive	down_in_svn	1.14	152.128	Unknown
met_fecal	2	pos_3566	0.0489224	-0.198506	Lower in Case	0.00971138	Fecal Metabolome	322.055	6.94	row814	E54	C00387	Guanosine	positive	down_in_svn	6.94	322.055	2,3-Desisopropylidenetopiramate
met_vams	2	rLC_neg_mtb_1091175	-0.144394	-0.0672125	Lower in Case	0.00970509	VAMS Metabolome	523.124	0.101267	row3172				negative	down_in_svn	NA	NA	NA
met_fecal	2	pos_5788	0.0455383	-0.204353	Lower in Case	0.0093059	Fecal Metabolome	634.876	7.46	row2344				positive	up_in_svn	7.46	634.876	Unknown
prot_dep	2	P12111	-0.0641452	0.143341	Higher in Case	0.00919466	Plasma Proteome (Depleted)	NA	NA	NA	NA	NA	NA	NA	NA	NA	NA	NA
met_fecal	2	pos_5095	-0.0576322	0.157644	Higher in Case	0.00908537	Fecal Metabolome	479.373	1.08	row1536	E2075	CE5837;CE5839	$	positive	up_in_svn	1.08	479.373	Unknown
met_vams	2	rLC_neg_mtb_3416771	0.148062	-0.0605889	Lower in Case	0.00897093	VAMS Metabolome	401.047	0.305867	row7783				negative	up_in_svn	NA	NA	NA
met_fecal	2	pos_2011	0.0614238	-0.144571	Lower in Case	0.0088801	Fecal Metabolome	223.154	1.17	row438				positive	down_in_svn	1.17	223.154	Tetraglyme
met_vams	2	rLC_pos_mtb_2706408	-0.0645245	0.137144	Higher in Case	0.00884915	VAMS Metabolome	606.286	0.188067	row1215				positive	down_in_svn	NA	NA	NA
stool_microbiome	2	Unknown_CAG.170.14	-0.244604	0.0360322	Higher in Case	0.00881364	Fecal Microbiome (Taxa)	NA	NA	NA	NA	NA	NA	NA	NA	NA	NA	NA
prot_dep	2	Q8IVG5	-0.0943875	0.0930848	Higher in Case	0.00878604	Plasma Proteome (Depleted)	NA	NA	NA	NA	NA	NA	NA	NA	NA	NA	NA
met_fecal	2	pos_0161	0.069682	-0.125483	Lower in Case	0.00874392	Fecal Metabolome	90.9767	7.46	row1630				positive	down_in_svn	7.46	90.9767	Unknown
met_pla	2	rLC_neg_mtb_6371	-0.0338257	0.255164	Higher in Case	0.00863111	Plasma Metabolome	172.958	0.0062	row2000				negative	up_in_svn	NA	NA	NA
stool_gene	2	K21399	-0.0425434	-0.195332	Lower in Case	0.00831011	Fecal Metagenome (Genes)	NA	NA	NA	NA	NA	NA	NA	NA	NA	NA	NA
stool_gene	2	K17898	-0.0481092	-0.168771	Lower in Case	0.00811942	Fecal Metagenome (Genes)	NA	NA	NA	NA	NA	NA	NA	NA	NA	NA	NA
stool_gene	2	K00355	0.0440233	-0.179367	Lower in Case	0.00789632	Fecal Metagenome (Genes)	NA	NA	NA	NA	NA	NA	NA	NA	NA	NA	NA
stool_gene	2	3002647	-0.0351411	-0.223504	Lower in Case	0.00785418	Fecal Metagenome (Genes)	NA	NA	NA	NA	NA	NA	NA	NA	NA	NA	NA
prot_fecal	2	Q15067-2	0.0957104	-0.0812326	Lower in Case	0.00777481	Fecal Proteome	NA	NA	NA	NA	NA	NA	NA	NA	NA	NA	NA
stool_gene	2	K21677	-0.056782	0.130709	Higher in Case	0.00742193	Fecal Metagenome (Genes)	NA	NA	NA	NA	NA	NA	NA	NA	NA	NA	NA
met_vams	2	rLC_neg_mtb_7117017	0.0646064	-0.113743	Lower in Case	0.00734853	VAMS Metabolome	238.891	0.690267	row906				negative	down_in_svn	NA	NA	NA
stool_gene	2	K07406	-0.0818325	-0.0889959	Lower in Case	0.00728276	Fecal Metagenome (Genes)	NA	NA	NA	NA	NA	NA	NA	NA	NA	NA	NA
prot_fecal	2	O14949	-0.0663089	-0.108655	Lower in Case	0.00720478	Fecal Proteome	NA	NA	NA	NA	NA	NA	NA	NA	NA	NA	NA
stool_gene	2	K21611	-0.139328	0.0514927	Higher in Case	0.0071744	Fecal Metagenome (Genes)	NA	NA	NA	NA	NA	NA	NA	NA	NA	NA	NA
stool_gene	2	GH39_0	-0.142411	-0.0503645	Lower in Case	0.00717246	Fecal Metagenome (Genes)	NA	NA	NA	NA	NA	NA	NA	NA	NA	NA	NA
stool_gene	2	K22708	0.0416563	-0.172033	Lower in Case	0.00716626	Fecal Metagenome (Genes)	NA	NA	NA	NA	NA	NA	NA	NA	NA	NA	NA
stool_microbiome	2	ER4.sp900317525	-0.286315	0.0242075	Higher in Case	0.00693097	Fecal Microbiome (Taxa)	NA	NA	NA	NA	NA	NA	NA	NA	NA	NA	NA
met_vams	2	rLC_neg_mtb_1142485	-0.18691	0.0362313	Higher in Case	0.00677198	VAMS Metabolome	353.076	0.1116	row278				negative	up_in_svn	NA	NA	NA
prot_dep	2	O75688	0.180591	-0.0372589	Lower in Case	0.00672861	Plasma Proteome (Depleted)	NA	NA	NA	NA	NA	NA	NA	NA	NA	NA	NA
prot_dep	2	Q9GZU5	-0.266392	0.0247736	Higher in Case	0.00659948	Plasma Proteome (Depleted)	NA	NA	NA	NA	NA	NA	NA	NA	NA	NA	NA
met_vams	2	rLC_neg_mtb_4676968	0.0209049	-0.314164	Lower in Case	0.00656756	VAMS Metabolome	188.04	0.425733	row6621	E1433	CE5528		negative	down_in_svn	NA	NA	NA
stool_gene	2	K21000	-0.0800669	-0.081896	Lower in Case	0.00655716	Fecal Metagenome (Genes)	NA	NA	NA	NA	NA	NA	NA	NA	NA	NA	NA
stool_gene	2	K06423	-0.0358314	0.177262	Higher in Case	0.00635154	Fecal Metagenome (Genes)	NA	NA	NA	NA	NA	NA	NA	NA	NA	NA	NA
stool_gene	2	Blon_2173	-0.0488855	-0.127096	Lower in Case	0.00621315	Fecal Metagenome (Genes)	NA	NA	NA	NA	NA	NA	NA	NA	NA	NA	NA
met_fecal	2	pos_1374	-0.0406761	0.144237	Higher in Case	0.005867	Fecal Metabolome	183.138	1.05	row1244				positive	up_in_svn	1.05	183.138	Unknown
prot_dep	2	P11021	-0.024825	0.235269	Higher in Case	0.00584055	Plasma Proteome (Depleted)	NA	NA	NA	NA	NA	NA	NA	NA	NA	NA	NA
stool_microbiome	2	UBA4644.sp900555855	-0.11702	-0.0490198	Lower in Case	0.00573631	Fecal Microbiome (Taxa)	NA	NA	NA	NA	NA	NA	NA	NA	NA	NA	NA
stool_gene	2	K22011	-0.078917	-0.0715826	Lower in Case	0.00564908	Fecal Metagenome (Genes)	NA	NA	NA	NA	NA	NA	NA	NA	NA	NA	NA
met_fecal	2	pos_3216	-0.0451416	0.124765	Higher in Case	0.00563207	Fecal Metabolome	297.146	4.92	row2225				positive	up_in_svn	4.92	297.146	Unknown
stool_gene	2	K21514	-0.0521963	-0.10706	Lower in Case	0.00558816	Fecal Metagenome (Genes)	NA	NA	NA	NA	NA	NA	NA	NA	NA	NA	NA
clinical	2	impr_sanitation	0.122608	0.0454641	Higher in Case	0.00557428	Clinical	NA	NA	NA	NA	NA	NA	NA	NA	NA	NA	NA
met_vams	2	rLC_neg_mtb_240665	-0.076366	0.0719559	Higher in Case	0.00549498	VAMS Metabolome	1133.07	0.0413333	row5724				negative	down_in_svn	NA	NA	NA
met_pla	2	rLC_neg_mtb_1154527	-0.0277757	0.194254	Higher in Case	0.00539554	Plasma Metabolome	386.036	0.140533	row1275				negative	up_in_svn	NA	NA	NA
clinical	2	asset1comp_10	-0.194574	0.0277042	Higher in Case	0.00539052	Clinical	NA	NA	NA	NA	NA	NA	NA	NA	NA	NA	NA
met_fecal	2	pos_4363	0.0584601	-0.0899165	Lower in Case	0.00525652	Fecal Metabolome	390.322	1.08	row568	E772;E1243	C01747;ttdcrn	Psychosine; Galactosylsphingosine; O-Galactosylsphingosine;tetradecanoyl carnitine	positive	down_in_svn	1.08	390.322	Unknown
met_fecal	2	pos_3463	0.028043	-0.185892	Lower in Case	0.00521299	Fecal Metabolome	314.146	6.12	row1347				positive	down_in_svn	6.12	314.146	Unknown
stool_scfa	2	Acetate	-0.158991	0.0326468	Higher in Case	0.00519056	Fecal SCFAs	NA	NA	NA	NA	NA	NA	NA	NA	NA	NA	NA
stool_microbiome	2	CAG.170.sp000432135	-0.0385459	0.13341	Higher in Case	0.00514241	Fecal Microbiome (Taxa)	NA	NA	NA	NA	NA	NA	NA	NA	NA	NA	NA
stool_gene	2	K05841	-0.107386	-0.0478824	Lower in Case	0.00514191	Fecal Metagenome (Genes)	NA	NA	NA	NA	NA	NA	NA	NA	NA	NA	NA
stool_gene	2	K07333	-0.169297	0.0302611	Higher in Case	0.0051231	Fecal Metagenome (Genes)	NA	NA	NA	NA	NA	NA	NA	NA	NA	NA	NA
stool_gene	2	3000855	-0.0985519	-0.0510747	Lower in Case	0.00503351	Fecal Metagenome (Genes)	NA	NA	NA	NA	NA	NA	NA	NA	NA	NA	NA
stool_gene	2	K25154	-0.175357	0.0284578	Higher in Case	0.00499027	Fecal Metagenome (Genes)	NA	NA	NA	NA	NA	NA	NA	NA	NA	NA	NA
stool_gene	2	K10725	-0.100454	-0.048952	Lower in Case	0.00491741	Fecal Metagenome (Genes)	NA	NA	NA	NA	NA	NA	NA	NA	NA	NA	NA
stool_microbiome	2	Unknown_Faecalibacterium	0.0409671	-0.119562	Lower in Case	0.00489812	Fecal Microbiome (Taxa)	NA	NA	NA	NA	NA	NA	NA	NA	NA	NA	NA
met_fecal	2	pos_4077	0.0271236	-0.178904	Lower in Case	0.00485252	Fecal Metabolome	362.926	7.45	row271				positive	down_in_svn	7.45	362.926	Unknown
stool_gene	2	K06285	-0.0718561	-0.0651177	Lower in Case	0.0046791	Fecal Metagenome (Genes)	NA	NA	NA	NA	NA	NA	NA	NA	NA	NA	NA
prot_nav	2	P08697	-0.0618108	-0.0741624	Lower in Case	0.00458404	Plasma Proteome (Naive)	NA	NA	NA	NA	NA	NA	NA	NA	NA	NA	NA
stool_microbiome	2	CAG.83.sp900556015	-0.142466	-0.03201	Lower in Case	0.00456035	Fecal Microbiome (Taxa)	NA	NA	NA	NA	NA	NA	NA	NA	NA	NA	NA
prot_dep	2	Q92959	-0.211985	0.0213312	Higher in Case	0.0045219	Plasma Proteome (Depleted)	NA	NA	NA	NA	NA	NA	NA	NA	NA	NA	NA
stool_gene	2	GH5_19	-0.160225	-0.0281501	Lower in Case	0.00451035	Fecal Metagenome (Genes)	NA	NA	NA	NA	NA	NA	NA	NA	NA	NA	NA
stool_microbiome	2	CAG.170.sp003516765	-0.161574	0.027895	Higher in Case	0.0045071	Fecal Microbiome (Taxa)	NA	NA	NA	NA	NA	NA	NA	NA	NA	NA	NA
stool_gene	2	GH148_0	-0.0864515	0.0517485	Higher in Case	0.00447373	Fecal Metagenome (Genes)	NA	NA	NA	NA	NA	NA	NA	NA	NA	NA	NA
met_fecal	2	pos_1365	0.0339225	-0.130552	Lower in Case	0.00442867	Fecal Metabolome	183.074	7.86	row444				positive	down_in_svn	7.86	183.074	Triethyl phosphate
stool_gene	2	K03051	-0.102641	0.0426436	Higher in Case	0.00437697	Fecal Metagenome (Genes)	NA	NA	NA	NA	NA	NA	NA	NA	NA	NA	NA
met_fecal	2	pos_4093	0.0678498	-0.0643694	Lower in Case	0.00436745	Fecal Metabolome	364.269	1.33	row1141				positive	up_in_svn	1.33	364.269	Unknown
stool_gene	2	K25156	-0.144929	-0.0298059	Lower in Case	0.00431975	Fecal Metagenome (Genes)	NA	NA	NA	NA	NA	NA	NA	NA	NA	NA	NA
stool_gene	2	K22026	-0.0311803	-0.137402	Lower in Case	0.00428424	Fecal Metagenome (Genes)	NA	NA	NA	NA	NA	NA	NA	NA	NA	NA	NA
met_vams	2	rLC_neg_mtb_1316759	0.0131156	-0.324411	Lower in Case	0.00425483	VAMS Metabolome	319.076	0.144667	row5623				negative	up_in_svn	NA	NA	NA
met_vams	2	rLC_neg_mtb_3760541	0.0304594	-0.137612	Lower in Case	0.00419157	VAMS Metabolome	304.052	0.3224	row2345				negative	down_in_svn	NA	NA	NA
stool_gene	2	K04566	-0.0501519	-0.0805496	Lower in Case	0.00403971	Fecal Metagenome (Genes)	NA	NA	NA	NA	NA	NA	NA	NA	NA	NA	NA
stool_gene	2	K22223	-0.0598316	0.0666491	Higher in Case	0.00398772	Fecal Metagenome (Genes)	NA	NA	NA	NA	NA	NA	NA	NA	NA	NA	NA
prot_fecal	2	P23229-3	0.0629471	-0.0631389	Lower in Case	0.00397441	Fecal Proteome	NA	NA	NA	NA	NA	NA	NA	NA	NA	NA	NA
met_fecal	2	pos_2928	-0.024141	0.163388	Higher in Case	0.00394434	Fecal Metabolome	278.125	7.71	row2502	E437	C01449	Queuine; Base Q	positive	up_in_svn	7.71	278.125	w/o MS2:Entecavir
stool_gene	2	GH16_0	-0.0940555	-0.0416595	Lower in Case	0.00391831	Fecal Metagenome (Genes)	NA	NA	NA	NA	NA	NA	NA	NA	NA	NA	NA
stool_gene	2	K15913	-0.0217099	0.179047	Higher in Case	0.0038871	Fecal Metagenome (Genes)	NA	NA	NA	NA	NA	NA	NA	NA	NA	NA	NA
met_vams	2	rLC_neg_mtb_225509	0.0418686	-0.0924989	Lower in Case	0.0038728	VAMS Metabolome	1397.36	0.0165333	row7328				negative	down_in_svn	NA	NA	NA
met_fecal	2	pos_4705	-0.0537833	-0.0714633	Lower in Case	0.00384353	Fecal Metabolome	429.373	1.07	row1716	E1563;E2124	CE5022;CE5835;CE5842;stcrn	$$13'-hydroxy-alpha-tocopherol;stearoylcarnitine	positive	up_in_svn	1.07	429.373	Unknown
met_vams	2	rLC_neg_mtb_173969	-0.0268708	0.141447	Higher in Case	0.00380078	VAMS Metabolome	1270.64	0.0206667	row1542				negative	up_in_svn	NA	NA	NA
met_fecal	2	pos_0763	0.0250419	-0.15177	Lower in Case	0.00380061	Fecal Metabolome	143.959	1.04	row77				positive	down_in_svn	1.04	143.959	Unknown
prot_dep	2	P35443	-0.0153199	0.245444	Higher in Case	0.00376017	Plasma Proteome (Depleted)	NA	NA	NA	NA	NA	NA	NA	NA	NA	NA	NA
stool_gene	2	K02672	0.0388842	-0.0946203	Lower in Case	0.00367924	Fecal Metagenome (Genes)	NA	NA	NA	NA	NA	NA	NA	NA	NA	NA	NA
stool_gene	2	K01799	-0.211629	0.0172499	Higher in Case	0.00365058	Fecal Metagenome (Genes)	NA	NA	NA	NA	NA	NA	NA	NA	NA	NA	NA
met_pla	2	rLC_neg_mtb_1079343	0.0528618	-0.0686197	Lower in Case	0.00362736	Plasma Metabolome	108.046	0.115733	row2460				negative	down_in_svn	NA	NA	NA
met_fecal	2	pos_0658	0.0216977	-0.16692	Lower in Case	0.00362179	Fecal Metabolome	136.062	4.97	row52	E176	C00147	Adenine	positive	down_in_svn	4.97	136.062	Unknown
met_vams	2	rLC_pos_mtb_2633887	0.0188631	-0.191884	Lower in Case	0.00361954	VAMS Metabolome	346.008	0.1674	row1143	E491	C00559;C05198	Deoxyadenosine$5'-Deoxyadenosine	positive	down_in_svn	NA	NA	NA
prot_nav	2	P06310	-0.0890604	-0.0405187	Lower in Case	0.00360861	Plasma Proteome (Naive)	NA	NA	NA	NA	NA	NA	NA	NA	NA	NA	NA
prot_nav	2	P08603	-0.168943	-0.0212419	Lower in Case	0.00358867	Plasma Proteome (Naive)	NA	NA	NA	NA	NA	NA	NA	NA	NA	NA	NA
met_fecal	2	pos_1807	-0.0374843	0.0945375	Higher in Case	0.00354367	Fecal Metabolome	209.129	5.59	row1330	E192	CE5860		positive	up_in_svn	5.59	209.129	Unknown
met_vams	2	rLC_pos_mtb_2979513	-0.0159265	0.221614	Higher in Case	0.00352954	VAMS Metabolome	232.153	0.1922	row131	E134	C00410	Progesterone; 4-Pregnene-3,20-dione	positive	up_in_svn	NA	NA	NA
met_vams	2	rLC_neg_mtb_3709777	0.0428626	-0.0821912	Lower in Case	0.00352293	VAMS Metabolome	349.054	0.326533	row5863				negative	up_in_svn	NA	NA	NA
stool_gene	2	K02243	0.01197	-0.29372	Lower in Case	0.00351581	Fecal Metagenome (Genes)	NA	NA	NA	NA	NA	NA	NA	NA	NA	NA	NA
stool_gene	2	CBM12_0	-0.0317998	-0.110017	Lower in Case	0.00349852	Fecal Metagenome (Genes)	NA	NA	NA	NA	NA	NA	NA	NA	NA	NA	NA
stool_gene	2	K22232	-0.104072	-0.0325765	Lower in Case	0.0033903	Fecal Metagenome (Genes)	NA	NA	NA	NA	NA	NA	NA	NA	NA	NA	NA
met_vams	2	rLC_neg_mtb_4239221	-0.0136281	0.243106	Higher in Case	0.00331307	VAMS Metabolome	526.211	0.392667	row5813				negative	down_in_svn	NA	NA	NA
stool_gene	2	K12976	-0.0801073	0.0408077	Higher in Case	0.00326899	Fecal Metagenome (Genes)	NA	NA	NA	NA	NA	NA	NA	NA	NA	NA	NA
stool_gene	2	3002672	-0.0224767	-0.144583	Lower in Case	0.00324974	Fecal Metagenome (Genes)	NA	NA	NA	NA	NA	NA	NA	NA	NA	NA	NA
met_pla	2	rLC_pos_mtb_3740680	-0.0123395	0.262566	Higher in Case	0.00323993	Plasma Metabolome	485.437	0.258333	row1992				positive	up_in_svn	NA	NA	NA
stool_gene	2	K08097	-0.0248708	-0.127641	Lower in Case	0.00317452	Fecal Metagenome (Genes)	NA	NA	NA	NA	NA	NA	NA	NA	NA	NA	NA
met_pla	2	rLC_neg_mtb_3111438	0.0197945	-0.159953	Lower in Case	0.00316619	Plasma Metabolome	845.608	0.320333	row687	E1125	C02291;C00542	L-Cystathionine$Cystathionine	negative	down_in_svn	NA	NA	NA
prot_fecal	2	P51571	-0.108103	0.0291894	Higher in Case	0.00315546	Fecal Proteome	NA	NA	NA	NA	NA	NA	NA	NA	NA	NA	NA
stool_gene	2	K00547	0.0336792	0.0934685	Higher in Case	0.00314795	Fecal Metagenome (Genes)	NA	NA	NA	NA	NA	NA	NA	NA	NA	NA	NA
stool_microbiome	2	Methanobrevibacter_A.smithii	-0.0319176	-0.0985638	Lower in Case	0.00314592	Fecal Microbiome (Taxa)	NA	NA	NA	NA	NA	NA	NA	NA	NA	NA	NA
met_vams	2	rLC_neg_mtb_3436219	0.208772	0.0149973	Higher in Case	0.00313101	VAMS Metabolome	348.058	0.324467	row7726				negative	up_in_svn	NA	NA	NA
met_vams	2	rLC_neg_mtb_242508	-0.0240511	0.127387	Higher in Case	0.0030638	VAMS Metabolome	1217.79	0.0392667	row1695				negative	up_in_svn	NA	NA	NA
prot_nav	2	P01011	-0.0582727	-0.0516871	Lower in Case	0.00301194	Plasma Proteome (Naive)	NA	NA	NA	NA	NA	NA	NA	NA	NA	NA	NA
stool_gene	2	GH5_22	-0.0475066	0.063368	Higher in Case	0.0030104	Fecal Metagenome (Genes)	NA	NA	NA	NA	NA	NA	NA	NA	NA	NA	NA
met_vams	2	rLC_neg_mtb_1107354	-0.0270407	0.109714	Higher in Case	0.00296673	VAMS Metabolome	199.006	0.0992	row995				negative	up_in_svn	NA	NA	NA
stool_gene	2	GT81_0	-0.0754497	-0.0390789	Lower in Case	0.00294849	Fecal Metagenome (Genes)	NA	NA	NA	NA	NA	NA	NA	NA	NA	NA	NA
stool_microbiome	2	SFMI01.sp004556155	-0.026824	-0.106841	Lower in Case	0.00286592	Fecal Microbiome (Taxa)	NA	NA	NA	NA	NA	NA	NA	NA	NA	NA	NA
prot_nav	2	Q9P2D1	-0.0179626	-0.156757	Lower in Case	0.00281577	Plasma Proteome (Naive)	NA	NA	NA	NA	NA	NA	NA	NA	NA	NA	NA
stool_microbiome	2	CAG.83.sp900313295	-0.178903	-0.0142224	Lower in Case	0.00254444	Fecal Microbiome (Taxa)	NA	NA	NA	NA	NA	NA	NA	NA	NA	NA	NA
stool_gene	2	K22704	-0.0771192	-0.032596	Lower in Case	0.00251378	Fecal Metagenome (Genes)	NA	NA	NA	NA	NA	NA	NA	NA	NA	NA	NA
stool_gene	2	K05593	-0.0237821	-0.104921	Lower in Case	0.00249525	Fecal Metagenome (Genes)	NA	NA	NA	NA	NA	NA	NA	NA	NA	NA	NA
stool_gene	2	K01554	-0.0861614	-0.0289572	Lower in Case	0.00249499	Fecal Metagenome (Genes)	NA	NA	NA	NA	NA	NA	NA	NA	NA	NA	NA
met_vams	2	rLC_neg_mtb_1254102	-0.0874402	0.0283952	Higher in Case	0.00248288	VAMS Metabolome	319.098	0.1178	row8287				negative	down_in_svn	NA	NA	NA
met_fecal	2	pos_3582	-0.0102599	0.240161	Higher in Case	0.00246404	Fecal Metabolome	323.103	1.48	row14				positive	up_in_svn	1.48	323.103	Quinoline-2,6-diol
prot_dep	2	Q96N11	0.00822029	-0.281684	Lower in Case	0.00231552	Plasma Proteome (Depleted)	NA	NA	NA	NA	NA	NA	NA	NA	NA	NA	NA
prot_dep	2	O94812	0.0212535	-0.107492	Lower in Case	0.00228459	Plasma Proteome (Depleted)	NA	NA	NA	NA	NA	NA	NA	NA	NA	NA	NA
met_pla	2	rLC_neg_mtb_3280167	0.0115291	-0.195472	Lower in Case	0.00225363	Plasma Metabolome	186.044	0.345133	row2767				negative	down_in_svn	NA	NA	NA
stool_microbiome	2	CAG.170.sp900549635	-0.0419119	-0.0537205	Lower in Case	0.00225153	Fecal Microbiome (Taxa)	NA	NA	NA	NA	NA	NA	NA	NA	NA	NA	NA
prot_dep	2	Q09666	0.025255	-0.0883643	Lower in Case	0.00223165	Plasma Proteome (Depleted)	NA	NA	NA	NA	NA	NA	NA	NA	NA	NA	NA
met_vams	2	rLC_neg_mtb_642195	0.0279559	-0.0792905	Lower in Case	0.00221664	VAMS Metabolome	238.037	0.0599333	row4094				negative	down_in_svn	NA	NA	NA
stool_gene	2	K12537	-0.0658547	0.0329435	Higher in Case	0.00216949	Fecal Metagenome (Genes)	NA	NA	NA	NA	NA	NA	NA	NA	NA	NA	NA
stool_gene	2	K10037	0.0157838	-0.1306	Lower in Case	0.00206137	Fecal Metagenome (Genes)	NA	NA	NA	NA	NA	NA	NA	NA	NA	NA	NA
met_vams	2	rLC_neg_mtb_229216	-0.0630082	0.0322276	Higher in Case	0.0020306	VAMS Metabolome	1536.08	0.0227333	row2048				negative	up_in_svn	NA	NA	NA
met_vams	2	rLC_neg_mtb_1412964	0.0652024	-0.0304803	Lower in Case	0.00198739	VAMS Metabolome	189.017	0.144667	row2839				negative	up_in_svn	NA	NA	NA
met_fecal	2	pos_1298	0.0185952	-0.10644	Lower in Case	0.00197927	Fecal Metabolome	179.064	1.15	row1703				positive	down_in_svn	1.15	179.064	w/o MS2:Lorcaserin
stool_gene	2	3007106	-0.0174222	0.112402	Higher in Case	0.00195829	Fecal Metagenome (Genes)	NA	NA	NA	NA	NA	NA	NA	NA	NA	NA	NA
stool_gene	2	K25672	0.0342776	0.0548352	Higher in Case	0.00187962	Fecal Metagenome (Genes)	NA	NA	NA	NA	NA	NA	NA	NA	NA	NA	NA
stool_microbiome	2	Firm.11.sp900548145	-0.0178741	-0.104696	Lower in Case	0.00187135	Fecal Microbiome (Taxa)	NA	NA	NA	NA	NA	NA	NA	NA	NA	NA	NA
prot_fecal	2	P62330	-0.0324876	-0.0540826	Lower in Case	0.00175701	Fecal Proteome	NA	NA	NA	NA	NA	NA	NA	NA	NA	NA	NA
stool_gene	2	3002595	-0.0240462	-0.0712015	Lower in Case	0.00171213	Fecal Metagenome (Genes)	NA	NA	NA	NA	NA	NA	NA	NA	NA	NA	NA
met_pla	2	rLC_neg_mtb_4588488	-0.00895	0.188626	Higher in Case	0.00168821	Plasma Metabolome	306.044	0.572467	row4016				negative	up_in_svn	NA	NA	NA
stool_gene	2	GH141_0	-0.0353201	-0.0476312	Lower in Case	0.00168234	Fecal Metagenome (Genes)	NA	NA	NA	NA	NA	NA	NA	NA	NA	NA	NA
stool_gene	2	K13327	0.00761043	-0.220366	Lower in Case	0.00167708	Fecal Metagenome (Genes)	NA	NA	NA	NA	NA	NA	NA	NA	NA	NA	NA
met_pla	2	rLC_neg_mtb_2997651	-0.00717699	0.228984	Higher in Case	0.00164341	Plasma Metabolome	163.039	0.338933	row3004				negative	up_in_svn	NA	NA	NA
prot_nav	2	P05546	-0.0338493	0.0481264	Higher in Case	0.00162905	Plasma Proteome (Naive)	NA	NA	NA	NA	NA	NA	NA	NA	NA	NA	NA
stool_gene	2	3002597	-0.0147941	0.105888	Higher in Case	0.00156651	Fecal Metagenome (Genes)	NA	NA	NA	NA	NA	NA	NA	NA	NA	NA	NA
met_fecal	2	pos_1211	-0.0642604	0.0242977	Higher in Case	0.00156138	Fecal Metabolome	173.165	5.63	row1269				positive	up_in_svn	5.63	173.165	Unknown
met_pla	2	rLC_neg_mtb_3530727	0.0178205	-0.0869653	Lower in Case	0.00154976	Plasma Metabolome	533.417	0.367867	row4163				negative	down_in_svn	NA	NA	NA
met_pla	2	rLC_neg_mtb_874511	0.0121472	-0.127219	Lower in Case	0.00154535	Plasma Metabolome	563.141	0.121933	row4499				negative	down_in_svn	NA	NA	NA
stool_microbiome	2	UBA1777.sp900547315	-0.0142236	0.107221	Higher in Case	0.00152507	Fecal Microbiome (Taxa)	NA	NA	NA	NA	NA	NA	NA	NA	NA	NA	NA
met_vams	2	rLC_pos_mtb_174976	0.0118837	-0.126662	Lower in Case	0.00150521	VAMS Metabolome	175.071	31	row386				positive	down_in_svn	NA	NA	NA
prot_nav	2	Q12805	-0.0523615	0.0286657	Higher in Case	0.00150098	Plasma Proteome (Naive)	NA	NA	NA	NA	NA	NA	NA	NA	NA	NA	NA
prot_nav	2	O60312	0.0167015	-0.0892187	Lower in Case	0.00149008	Plasma Proteome (Naive)	NA	NA	NA	NA	NA	NA	NA	NA	NA	NA	NA
stool_microbiome	2	Unknown_CAG.170	-0.164342	-0.0084772	Lower in Case	0.00139316	Fecal Microbiome (Taxa)	NA	NA	NA	NA	NA	NA	NA	NA	NA	NA	NA
prot_fecal	2	C9J2C0	-0.00915832	0.149544	Higher in Case	0.00136957	Fecal Proteome	NA	NA	NA	NA	NA	NA	NA	NA	NA	NA	NA
prot_dep	2	Q76LX8	-0.0531603	0.0254834	Higher in Case	0.00135471	Plasma Proteome (Depleted)	NA	NA	NA	NA	NA	NA	NA	NA	NA	NA	NA
stool_gene	2	K07129	-0.0190854	-0.0678352	Lower in Case	0.00129466	Fecal Metagenome (Genes)	NA	NA	NA	NA	NA	NA	NA	NA	NA	NA	NA
stool_gene	2	K20447	-0.0591681	-0.0216489	Lower in Case	0.00128092	Fecal Metagenome (Genes)	NA	NA	NA	NA	NA	NA	NA	NA	NA	NA	NA
met_fecal	2	pos_0839	0.0181498	0.0703314	Higher in Case	0.0012765	Fecal Metabolome	148.06	8.48	row726	E755;E1234	C00217;C00025;C05938;C01879;C04281;C04282	D-Glutamate; D-Glutamic acid; D-Glutaminic acid; D-2-Aminoglutaric acid$L-Glutamate$L-4-Hydroxyglutamate semialdehyde;5-Oxoproline$L-1-Pyrroline-3-hydroxy-5-carboxylate$1-Pyrroline-4-hydroxy-2-carboxylate	positive	up_in_svn	8.48	148.06	Glutamic acid
stool_gene	2	K12536	-0.0559561	0.0227522	Higher in Case	0.00127313	Fecal Metagenome (Genes)	NA	NA	NA	NA	NA	NA	NA	NA	NA	NA	NA
stool_gene	2	K18453	-0.0242403	0.0497677	Higher in Case	0.00120638	Fecal Metagenome (Genes)	NA	NA	NA	NA	NA	NA	NA	NA	NA	NA	NA
met_pla	2	rLC_pos_mtb_7728780	0.00717426	-0.160781	Lower in Case	0.00115348	Plasma Metabolome	258.031	0.555933	row139				positive	down_in_svn	NA	NA	NA
stool_gene	2	3007085	-0.0139716	-0.0812726	Lower in Case	0.00113551	Fecal Metagenome (Genes)	NA	NA	NA	NA	NA	NA	NA	NA	NA	NA	NA
met_pla	2	rLC_neg_mtb_822171	0.011529	-0.0976636	Lower in Case	0.00112596	Plasma Metabolome	129.055	0.0992	row538	E1017	C16641	Irinotecan	negative	down_in_svn	NA	NA	NA
prot_fecal	2	P09972	-0.0599079	-0.0184249	Lower in Case	0.0011038	Fecal Proteome	NA	NA	NA	NA	NA	NA	NA	NA	NA	NA	NA
stool_gene	2	K15358	-0.0814805	-0.0133871	Lower in Case	0.00109079	Fecal Metagenome (Genes)	NA	NA	NA	NA	NA	NA	NA	NA	NA	NA	NA
met_pla	2	rLC_neg_mtb_14328	0.00322486	-0.331049	Lower in Case	0.00106758	Plasma Metabolome	347.041	0	row10	E34;E36	C04734;C00130	5-Formamido-1-(5-phospho-D-ribosyl)imidazole-4-carboxamide;IMP	negative	down_in_svn	NA	NA	NA
stool_gene	2	K25671	0.0406558	-0.0261127	Lower in Case	0.00106163	Fecal Metagenome (Genes)	NA	NA	NA	NA	NA	NA	NA	NA	NA	NA	NA
met_vams	2	rLC_neg_mtb_5300298	-0.0103229	-0.101475	Lower in Case	0.00104752	VAMS Metabolome	1682.78	0.5022	row2181				negative	down_in_svn	NA	NA	NA
stool_gene	2	K07562	-0.0723584	0.0141831	Higher in Case	0.00102626	Fecal Metagenome (Genes)	NA	NA	NA	NA	NA	NA	NA	NA	NA	NA	NA
met_vams	2	rLC_pos_mtb_784541	0.111301	-0.00890058	Lower in Case	0.000990645	VAMS Metabolome	198.05	0.0537333	row582				positive	down_in_svn	NA	NA	NA
prot_nav	2	A0A0B4J1V2	0.0396271	-0.0246651	Lower in Case	0.000977408	Plasma Proteome (Naive)	NA	NA	NA	NA	NA	NA	NA	NA	NA	NA	NA
prot_fecal	2	Q9Y6C9	-0.0298293	0.0327225	Higher in Case	0.000976088	Fecal Proteome	NA	NA	NA	NA	NA	NA	NA	NA	NA	NA	NA
met_vams	2	rLC_neg_mtb_3435379	0.0283954	0.0342655	Higher in Case	0.000972982	VAMS Metabolome	303.055	0.305867	row10376				negative	down_in_svn	NA	NA	NA
prot_nav	2	P51884	-0.164874	-0.00589237	Lower in Case	0.0009715	Plasma Proteome (Naive)	NA	NA	NA	NA	NA	NA	NA	NA	NA	NA	NA
stool_gene	2	GH5_28	-0.00797481	0.117217	Higher in Case	0.000934785	Fecal Metagenome (Genes)	NA	NA	NA	NA	NA	NA	NA	NA	NA	NA	NA
met_pla	2	rLC_pos_mtb_1172548	-0.0547065	0.016632	Higher in Case	0.00090988	Plasma Metabolome	1102.87	124	row1831				positive	down_in_svn	NA	NA	NA
prot_nav	2	P14618	-0.0142042	-0.0620173	Lower in Case	0.000880903	Plasma Proteome (Naive)	NA	NA	NA	NA	NA	NA	NA	NA	NA	NA	NA
prot_nav	2	P01714	0.0329575	-0.0252048	Lower in Case	0.000830688	Plasma Proteome (Naive)	NA	NA	NA	NA	NA	NA	NA	NA	NA	NA	NA
stool_gene	2	K02686	0.0139892	0.0588416	Higher in Case	0.000823145	Fecal Metagenome (Genes)	NA	NA	NA	NA	NA	NA	NA	NA	NA	NA	NA
stool_gene	2	K06936	-0.0317691	-0.025695	Lower in Case	0.000816307	Fecal Metagenome (Genes)	NA	NA	NA	NA	NA	NA	NA	NA	NA	NA	NA
met_vams	2	rLC_neg_mtb_241264	-0.036068	-0.0223247	Lower in Case	0.000805206	VAMS Metabolome	1156.91	0.0227333	row2095				negative	up_in_svn	NA	NA	NA
prot_fecal	2	Q8IVL8	0.0238595	-0.0327981	Lower in Case	0.000782546	Fecal Proteome	NA	NA	NA	NA	NA	NA	NA	NA	NA	NA	NA
stool_gene	2	K02883	-0.109843	-0.00712239	Lower in Case	0.000782342	Fecal Metagenome (Genes)	NA	NA	NA	NA	NA	NA	NA	NA	NA	NA	NA
prot_fecal	2	O14745	0.0988679	-0.00778842	Lower in Case	0.000770024	Fecal Proteome	NA	NA	NA	NA	NA	NA	NA	NA	NA	NA	NA
met_vams	2	rLC_neg_mtb_3609113	-0.0124279	0.0600948	Higher in Case	0.000746853	VAMS Metabolome	489.276	0.3348	row1613				negative	up_in_svn	NA	NA	NA
prot_dep	2	Q13451	-0.0280924	0.0264408	Higher in Case	0.000742786	Plasma Proteome (Depleted)	NA	NA	NA	NA	NA	NA	NA	NA	NA	NA	NA
stool_microbiome	2	CAG.83.sp000435555	-0.010629	0.0685398	Higher in Case	0.000728512	Fecal Microbiome (Taxa)	NA	NA	NA	NA	NA	NA	NA	NA	NA	NA	NA
stool_gene	2	3006471	-0.00542607	-0.120077	Lower in Case	0.000651548	Fecal Metagenome (Genes)	NA	NA	NA	NA	NA	NA	NA	NA	NA	NA	NA
prot_fecal	2	P54819-2	-0.00823197	0.0701851	Higher in Case	0.000577762	Fecal Proteome	NA	NA	NA	NA	NA	NA	NA	NA	NA	NA	NA
stool_gene	2	CBM85_0	-0.0231281	0.022671	Higher in Case	0.000524336	Fecal Metagenome (Genes)	NA	NA	NA	NA	NA	NA	NA	NA	NA	NA	NA
met_pla	2	rLC_neg_mtb_3199038	-0.0126151	0.0389045	Higher in Case	0.000490784	Plasma Metabolome	844.605	0	row5299				negative	up_in_svn	NA	NA	NA
stool_gene	2	K00187	-0.0210161	0.0222034	Higher in Case	0.000466628	Fecal Metagenome (Genes)	NA	NA	NA	NA	NA	NA	NA	NA	NA	NA	NA
stool_gene	2	K18783	-0.0216369	0.0211463	Higher in Case	0.00045754	Fecal Metagenome (Genes)	NA	NA	NA	NA	NA	NA	NA	NA	NA	NA	NA
prot_fecal	2	P61803	-0.0594878	0.00700105	Higher in Case	0.000416477	Fecal Proteome	NA	NA	NA	NA	NA	NA	NA	NA	NA	NA	NA
stool_microbiome	2	Unknown_CAG.170.2	-0.0212544	-0.0178683	Lower in Case	0.00037978	Fecal Microbiome (Taxa)	NA	NA	NA	NA	NA	NA	NA	NA	NA	NA	NA
prot_dep	2	Q13740	-0.0641517	-0.0059034	Lower in Case	0.000378713	Plasma Proteome (Depleted)	NA	NA	NA	NA	NA	NA	NA	NA	NA	NA	NA
met_pla	2	rLC_pos_mtb_1002555	0.0259585	-0.013981	Lower in Case	0.000362927	Plasma Metabolome	180.983	0.115733	row2454				positive	down_in_svn	NA	NA	NA
met_vams	2	rLC_neg_mtb_30604	0.0954785	-0.00374234	Lower in Case	0.000357313	VAMS Metabolome	459.293	0.00826667	row1095				negative	up_in_svn	NA	NA	NA
prot_fecal	2	Q8WW52	0.00817843	0.0368858	Higher in Case	0.000301667	Fecal Proteome	NA	NA	NA	NA	NA	NA	NA	NA	NA	NA	NA
met_pla	2	rLC_neg_mtb_849017	0.00197421	-0.130652	Lower in Case	0.000257935	Plasma Metabolome	429.079	0.115733	row5423				negative	up_in_svn	NA	NA	NA
stool_gene	2	GH117_0	-0.00157194	-0.140653	Lower in Case	0.000221099	Fecal Metagenome (Genes)	NA	NA	NA	NA	NA	NA	NA	NA	NA	NA	NA
stool_gene	2	K25670	0.0265156	-0.00820363	Lower in Case	0.000217524	Fecal Metagenome (Genes)	NA	NA	NA	NA	NA	NA	NA	NA	NA	NA	NA
stool_gene	2	GH48_0	-0.0219543	-0.00869851	Lower in Case	0.00019097	Fecal Metagenome (Genes)	NA	NA	NA	NA	NA	NA	NA	NA	NA	NA	NA
stool_gene	2	3002186	-0.0238746	-0.00773148	Lower in Case	0.000184586	Fecal Metagenome (Genes)	NA	NA	NA	NA	NA	NA	NA	NA	NA	NA	NA
met_pla	2	rLC_pos_mtb_2819729	-0.00281338	0.0470673	Higher in Case	0.000132418	Plasma Metabolome	457.315	0.2108	row1327				positive	down_in_svn	NA	NA	NA
met_pla	2	rLC_pos_mtb_9639638	0.00059214	-0.125014	Lower in Case	7.40258e-05	Plasma Metabolome	369	0.659267	row1455				positive	down_in_svn	NA	NA	NA
met_pla	2	rLC_neg_mtb_1082060	0.000823247	-0.0834161	Lower in Case	6.8672e-05	Plasma Metabolome	372.849	0.1488	row4621				negative	up_in_svn	NA	NA	NA
stool_gene	2	GT33_0	-0.00128367	-0.0510483	Lower in Case	6.55291e-05	Fecal Metagenome (Genes)	NA	NA	NA	NA	NA	NA	NA	NA	NA	NA	NA
stool_gene	2	K11622	-0.0010372	-0.051791	Lower in Case	5.37175e-05	Fecal Metagenome (Genes)	NA	NA	NA	NA	NA	NA	NA	NA	NA	NA	NA
met_vams	2	rLC_neg_mtb_3437154	0.0206011	0.0018966	Higher in Case	3.9072e-05	VAMS Metabolome	400.052	0.312067	row8516				negative	up_in_svn	NA	NA	NA
