# Supplementary material
Source: Research Square preprint supplement (doi:10.21203/rs.3.rs-10243829/v1)
Supplement: Supplementary file 2 [file 78a98203b4853177e42b2133.xlsx]

## Sheet: description
dWHZ_early_comp1 & dWHZ_early_comp2
Column	Explanation	Remarks
block:	Omics data block from which the feature was selected.
feature:	Feature identifier as represented in the input dataset.
feature_model:	Unique feature label used in the sPLS modeling output.
block_label:	Human-readable label for the corresponding omics block.
timepoint:	Sampling time point at which the feature was measured.
block_key:	Internal identifier combining block and feature information for tracking across analyses.
signed_score:	Feature ranking metric retaining the direction of association.
score:	Absolute feature ranking metric used to prioritize features.
beta_svn:	Estimated effect size for the association between the feature and SVN status.
conf.low:	Lower bound of the confidence interval for beta_svn.
conf.high:	Upper bound of the confidence interval for beta_svn.
p_value:	Nominal p-value for the association with SVN status.
svn_direction:	Direction of association with SVN status (higher in SVNs or controls).
mz:	Mass-to-charge ratio of the metabolite feature, where applicable.	for metabolome features only
rt:	Retention time of the metabolite feature, where applicable.	for metabolome features only
ion_mode:	Ionization mode used for metabolite detection, where applicable.	for metabolome features only; from mummichog
mummi_EID:	Mummichog empirical feature identifier, where applicable.	for metabolome features only; from mummichog
mummi_compounds:	Candidate compound IDs assigned by Mummichog, where applicable.	for metabolome features only; from mummichog
mummi_compound_names:	Candidate compound names assigned by Mummichog, where applicable.	for metabolome features only; from mummichog

## Sheet: dWHZ_early_comp1
block	feature	feature_model	block_label	timepoint	block_key	signed_score	score	beta_svn	conf.low	conf.high	p_value	svn_direction	mz	rt	ion_mode	mummi_EID	mummi_compounds	mummi_compound_names
milk_hmo_1421	LNT_nmol/mL	milk_hmo_1421__LNT_nmol/mL	Milk HMOs	14-21 days	hmos	0.0912502	0.0912502	0.192489	-0.0688748	0.453852	0.148253	Higher in SVN
milk_hmo_1421	LSTb_nmol/mL	milk_hmo_1421__LSTb_nmol/mL	Milk HMOs	14-21 days	hmos	0.0829974	0.0829974	0.105361	-0.156686	0.367408	0.429349	Higher in SVN
milk_metabolome_1421	rLC_neg_mtb_1565959	milk_metabolome_1421__rLC_neg_mtb_1565959	Milk Metabolome	14-21 days	milk_metabolome	0.0827349	0.0827349	0.200965	-0.0603103	0.462241	0.131133	Higher in SVN	142.051	128	negative	E754;E756	C00956;C04092;C00450	L-2-Aminoadipate; L-alpha-Aminoadipate; L-alpha-Aminoadipic acid; L-2-Aminoadipic acid; L-2-Aminohexanedioate;delta1-Piperideine-2-carboxylate; 1,2-Didehydropiperidine-2-carboxylate$2,3,4,5-Tetrahydropyridine-2-carboxylate; delta1-Piperideine-6-L-carboxylate
milk_bioactive_1421	Insulin	milk_bioactive_1421__Insulin	Milk Bioactive Proteins	14-21 days	bioactive_proteins	-0.0711463	0.0711463	0.193365	-0.0679897	0.45472	0.146408	Higher in SVN
milk_targeted_1421	PC.ae.C30.2	milk_targeted_1421__PC.ae.C30.2	Milk Targeted Metabolites	14-21 days	targeted_metabolites	-0.0692044	0.0692044	0.044103	-0.218185	0.306391	0.7409	Higher in SVN
milk_hmo_1421	6'SL_nmol/mL	milk_hmo_1421__6'SL_nmol/mL	Milk HMOs	14-21 days	hmos	0.0627197	0.0627197	0.0639103	-0.198321	0.326142	0.631784	Higher in SVN
milk_metabolome_1421	rLC_neg_mtb_6389862	milk_metabolome_1421__rLC_neg_mtb_6389862	Milk Metabolome	14-21 days	milk_metabolome	-0.0593781	0.0593781	0.245619	-0.0151297	0.506368	0.0647547	Higher in SVN	697.453	469	negative
milk_metabolome_1421	rLC_neg_mtb_1505881	milk_metabolome_1421__rLC_neg_mtb_1505881	Milk Metabolome	14-21 days	milk_metabolome	0.0565855	0.0565855	0.158272	-0.103408	0.419951	0.234827	Higher in SVN	1341.46	0.11	negative
milk_bioactive_1421	FGF-21	milk_bioactive_1421__FGF-21	Milk Bioactive Proteins	14-21 days	bioactive_proteins	0.0560454	0.0560454	-0.0417789	-0.304072	0.220514	0.754103	Lower in SVN
maternal_taxa_12	Unknown_CAG.1000_2.1	maternal_taxa_12__Unknown_CAG.1000_2.1	Maternal Fecal Microbiome (Taxa)	1-2 months	stool_microbiome_maternal	0.0556287	0.0556287	-0.087549	-0.349687	0.174589	0.511447	Lower in SVN
maternal_prot_nav_12	P05090	maternal_prot_nav_12__P05090	Maternal Plasma Proteome (Naive)	1-2 months	prot_nav	-0.0555454	0.0555454	-0.0851492	-0.347298	0.176999	0.5231	Lower in SVN
maternal_prot_nav_12	Q9NZP8	maternal_prot_nav_12__Q9NZP8	Maternal Plasma Proteome (Naive)	1-2 months	prot_nav	0.0544118	0.0544118	-0.0749073	-0.337099	0.187284	0.574307	Lower in SVN
milk_hmo_1421	DSLNT_nmol/mL	milk_hmo_1421__DSLNT_nmol/mL	Milk HMOs	14-21 days	hmos	0.0538361	0.0538361	0.283358	0.0231372	0.543578	0.0329343	Higher in SVN
maternal_prot_nav_12	P02652	maternal_prot_nav_12__P02652	Maternal Plasma Proteome (Naive)	1-2 months	prot_nav	-0.0527884	0.0527884	-0.210395	-0.471568	0.0507785	0.113926	Lower in SVN
maternal_taxa_12	Unknown_UMGS1810.2	maternal_taxa_12__Unknown_UMGS1810.2	Maternal Fecal Microbiome (Taxa)	1-2 months	stool_microbiome_maternal	0.0522499	0.0522499	0.113181	-0.148821	0.375183	0.395861	Higher in SVN
milk_hmo_1421	DFLNH_nmol/mL	milk_hmo_1421__DFLNH_nmol/mL	Milk HMOs	14-21 days	hmos	-0.0495654	0.0495654	-0.153713	-0.415431	0.108004	0.248615	Lower in SVN
maternal_prot_nav_12	O95445	maternal_prot_nav_12__O95445	Maternal Plasma Proteome (Naive)	1-2 months	prot_nav	-0.0495642	0.0495642	-0.112466	-0.374472	0.149541	0.398859	Lower in SVN
maternal_prot_nav_12	P35858	maternal_prot_nav_12__P35858	Maternal Plasma Proteome (Naive)	1-2 months	prot_nav	0.0492137	0.0492137	-0.0380365	-0.300338	0.224265	0.775513	Lower in SVN
maternal_prot_dep_12	Q12805	maternal_prot_dep_12__Q12805	Maternal Plasma Proteome (Depleted)	1-2 months	prot_dep	-0.0473563	0.0473563	-0.0508767	-0.313148	0.211394	0.702862	Lower in SVN
milk_metabolome_1421	rLC_neg_mtb_1223525	milk_metabolome_1421__rLC_neg_mtb_1223525	Milk Metabolome	14-21 days	milk_metabolome	0.0462188	0.0462188	0.203412	-0.0578376	0.464661	0.126487	Higher in SVN	1631.55	93	negative
maternal_taxa_12	Unknown_Lachnospiraceae.16	maternal_taxa_12__Unknown_Lachnospiraceae.16	Maternal Fecal Microbiome (Taxa)	1-2 months	stool_microbiome_maternal	0.0430931	0.0430931	0.0556104	-0.206647	0.317868	0.676706	Higher in SVN
maternal_taxa_12	Unknown_UBA9475.1	maternal_taxa_12__Unknown_UBA9475.1	Maternal Fecal Microbiome (Taxa)	1-2 months	stool_microbiome_maternal	0.0417706	0.0417706	-0.0501839	-0.312457	0.212089	0.706721	Lower in SVN
milk_hmo_1421	DFLac_nmol/mL	milk_hmo_1421__DFLac_nmol/mL	Milk HMOs	14-21 days	hmos	-0.0417247	0.0417247	0.0725911	-0.189609	0.334792	0.586206	Higher in SVN
milk_targeted_1421	FA.14.0.	milk_targeted_1421__FA.14.0.	Milk Targeted Metabolites	14-21 days	targeted_metabolites	-0.0402487	0.0402487	0.0823705	-0.17979	0.344531	0.536759	Higher in SVN
maternal_prot_nav_12	P02751	maternal_prot_nav_12__P02751	Maternal Plasma Proteome (Naive)	1-2 months	prot_nav	-0.0400909	0.0400909	-0.0592023	-0.321449	0.203045	0.657113	Lower in SVN
milk_hmo_1421	Sia_nmol/mL	milk_hmo_1421__Sia_nmol/mL	Milk HMOs	14-21 days	hmos	0.0399271	0.0399271	-0.00953353	-0.27187	0.252803	0.943023	Lower in SVN
maternal_prot_nav_12	Q5T124	maternal_prot_nav_12__Q5T124	Maternal Plasma Proteome (Naive)	1-2 months	prot_nav	-0.0389738	0.0389738	-0.12626	-0.38818	0.135659	0.343486	Lower in SVN
milk_metabolome_1421	rLC_pos_mtb_5111620	milk_metabolome_1421__rLC_pos_mtb_5111620	Milk Metabolome	14-21 days	milk_metabolome	-0.0389511	0.0389511	0.0753214	-0.186869	0.337511	0.572192	Higher in SVN	564.469	345	positive
maternal_taxa_12	Bacteroides.eggerthii	maternal_taxa_12__Bacteroides.eggerthii	Maternal Fecal Microbiome (Taxa)	1-2 months	stool_microbiome_maternal	-0.0378278	0.0378278	0.0135192	-0.248815	0.275853	0.919272	Higher in SVN
milk_targeted_1421	TG.18.3_34.1.	milk_targeted_1421__TG.18.3_34.1.	Milk Targeted Metabolites	14-21 days	targeted_metabolites	0.037297	0.037297	0.077819	-0.184361	0.339999	0.559512	Higher in SVN
milk_metabolome_1421	rLC_neg_mtb_6421331	milk_metabolome_1421__rLC_neg_mtb_6421331	Milk Metabolome	14-21 days	milk_metabolome	-0.0367478	0.0367478	0.276018	0.0156884	0.536347	0.0377831	Higher in SVN	672.453	469	negative
milk_metabolome_1421	rLC_neg_mtb_6599893	milk_metabolome_1421__rLC_neg_mtb_6599893	Milk Metabolome	14-21 days	milk_metabolome	0.035961	0.035961	-0.14326	-0.405059	0.118539	0.282334	Lower in SVN	289.072	492	negative
milk_metabolome_1421	rLC_neg_mtb_6362248	milk_metabolome_1421__rLC_neg_mtb_6362248	Milk Metabolome	14-21 days	milk_metabolome	-0.0356029	0.0356029	0.254643	-0.0059859	0.515273	0.0554612	Higher in SVN	742.456	469	negative
maternal_prot_dep_12	Q05BV3	maternal_prot_dep_12__Q05BV3	Maternal Plasma Proteome (Depleted)	1-2 months	prot_dep	0.0350142	0.0350142	-0.202151	-0.463414	0.0591116	0.128864	Lower in SVN
milk_metabolome_1421	rLC_neg_mtb_6368810	milk_metabolome_1421__rLC_neg_mtb_6368810	Milk Metabolome	14-21 days	milk_metabolome	-0.0347995	0.0347995	0.261177	0.000636606	0.521717	0.0494466	Higher in SVN	1151.84	469	negative
maternal_taxa_12	Prevotella.sp900553595	maternal_taxa_12__Prevotella.sp900553595	Maternal Fecal Microbiome (Taxa)	1-2 months	stool_microbiome_maternal	0.0342329	0.0342329	0.0448823	-0.217404	0.307168	0.73649	Higher in SVN
milk_taxa_1421	Bacillus_A.sp5	milk_taxa_1421__Bacillus_A.sp5	Milk Microbiome (Taxa)	14-21 days	milk_microbiome	0.0331131	0.0331131	-0.0616462	-0.323885	0.200593	0.643913	Lower in SVN
maternal_taxa_12	Oscillibacter.sp900550685	maternal_taxa_12__Oscillibacter.sp900550685	Maternal Fecal Microbiome (Taxa)	1-2 months	stool_microbiome_maternal	-0.0326968	0.0326968	0.00565887	-0.256679	0.267997	0.966161	Higher in SVN
milk_metabolome_1421	rLC_pos_mtb_3952867	milk_metabolome_1421__rLC_pos_mtb_3952867	Milk Metabolome	14-21 days	milk_metabolome	-0.0323878	0.0323878	0.144399	-0.117391	0.40619	0.278517	Higher in SVN	469.423	279	positive
milk_metabolome_1421	rLC_neg_mtb_6088463	milk_metabolome_1421__rLC_neg_mtb_6088463	Milk Metabolome	14-21 days	milk_metabolome	-0.0322009	0.0322009	0.237783	-0.0230655	0.498632	0.0738268	Higher in SVN	644.422	446	negative
maternal_prot_dep_12	Q9Y4F9	maternal_prot_dep_12__Q9Y4F9	Maternal Plasma Proteome (Depleted)	1-2 months	prot_dep	0.0314973	0.0314973	0.0715522	-0.190652	0.333757	0.591581	Higher in SVN
milk_targeted_1421	FA.12.0.	milk_targeted_1421__FA.12.0.	Milk Targeted Metabolites	14-21 days	targeted_metabolites	-0.0310235	0.0310235	0.195377	-0.0659567	0.456711	0.142238	Higher in SVN
milk_metabolome_1421	rLC_neg_mtb_6390866	milk_metabolome_1421__rLC_neg_mtb_6390866	Milk Metabolome	14-21 days	milk_metabolome	-0.0295498	0.0295498	0.110797	-0.151219	0.372813	0.405901	Higher in SVN	743.455	469	negative
maternal_prot_nav_12	P04004	maternal_prot_nav_12__P04004	Maternal Plasma Proteome (Naive)	1-2 months	prot_nav	0.0277568	0.0277568	0.11726	-0.144717	0.379238	0.379035	Higher in SVN
milk_macro_micro_1421	TRP	milk_macro_micro_1421__TRP	Milk Macro- and Micronutrients	14-21 days	macro_micronutrients	-0.0267665	0.0267665	0.223908	-0.0371104	0.484926	0.0924097	Higher in SVN
milk_metabolome_1421	rLC_neg_mtb_6024136	milk_metabolome_1421__rLC_neg_mtb_6024136	Milk Metabolome	14-21 days	milk_metabolome	-0.0267002	0.0267002	0.23846	-0.0223805	0.4993	0.073005	Higher in SVN	702.408	446	negative
milk_taxa_1421	Pseudomonas_B_650451.sp1	milk_taxa_1421__Pseudomonas_B_650451.sp1	Milk Microbiome (Taxa)	14-21 days	milk_microbiome	-0.0265695	0.0265695	-0.0651201	-0.327348	0.197108	0.625342	Lower in SVN
milk_macro_micro_1421	Cu	milk_macro_micro_1421__Cu	Milk Macro- and Micronutrients	14-21 days	macro_micronutrients	-0.026296	0.026296	-0.0106989	-0.273035	0.251637	0.936072	Lower in SVN
milk_metabolome_1421	rLC_neg_mtb_6361639	milk_metabolome_1421__rLC_neg_mtb_6361639	Milk Metabolome	14-21 days	milk_metabolome	-0.0262714	0.0262714	0.356277	0.0972948	0.615258	0.00718508	Higher in SVN	700.448	469	negative
maternal_gene_12	K21572	maternal_gene_12__K21572	Maternal Fecal Metagenome (Genes)	1-2 months	stool_gene_maternal	0.026066	0.026066	-0.0325848	-0.294896	0.229726	0.807004	Lower in SVN
maternal_taxa_12	CAG.115.sp003507295	maternal_taxa_12__CAG.115.sp003507295	Maternal Fecal Microbiome (Taxa)	1-2 months	stool_microbiome_maternal	-0.0259622	0.0259622	0.200788	-0.0604894	0.462065	0.131475	Higher in SVN
milk_metabolome_1421	rLC_neg_mtb_6115572	milk_metabolome_1421__rLC_neg_mtb_6115572	Milk Metabolome	14-21 days	milk_metabolome	-0.0258088	0.0258088	0.234522	-0.0263672	0.495412	0.0778953	Higher in SVN	633.398	448	negative
milk_macro_micro_1421	NAD	milk_macro_micro_1421__NAD	Milk Macro- and Micronutrients	14-21 days	macro_micronutrients	0.0255386	0.0255386	0.14933	-0.112422	0.411083	0.262395	Higher in SVN
milk_taxa_1421	Rothia.sp001808955.14	milk_taxa_1421__Rothia.sp001808955.14	Milk Microbiome (Taxa)	14-21 days	milk_microbiome	-0.0254381	0.0254381	-0.0505761	-0.312848	0.211696	0.704535	Lower in SVN
milk_metabolome_1421	rLC_neg_mtb_6790107	milk_metabolome_1421__rLC_neg_mtb_6790107	Milk Metabolome	14-21 days	milk_metabolome	-0.0252879	0.0252879	0.331751	0.0723201	0.591181	0.0123866	Higher in SVN	593.419	494	negative
milk_metabolome_1421	rLC_neg_mtb_6567483	milk_metabolome_1421__rLC_neg_mtb_6567483	Milk Metabolome	14-21 days	milk_metabolome	0.0250415	0.0250415	0.039423	-0.222875	0.301721	0.76756	Higher in SVN	304.051	475	negative
milk_macro_micro_1421	Zn	milk_macro_micro_1421__Zn	Milk Macro- and Micronutrients	14-21 days	macro_micronutrients	0.0250045	0.0250045	0.0472624	-0.215018	0.309543	0.723073	Higher in SVN
milk_metabolome_1421	rLC_neg_mtb_6056404	milk_metabolome_1421__rLC_neg_mtb_6056404	Milk Metabolome	14-21 days	milk_metabolome	-0.025004	0.025004	0.26143	0.000893311	0.521967	0.0492249	Higher in SVN	715.423	446	negative
milk_macro_micro_1421	B3	milk_macro_micro_1421__B3	Milk Macro- and Micronutrients	14-21 days	macro_micronutrients	0.0249431	0.0249431	0.163621	-0.0980138	0.425255	0.219344	Higher in SVN
milk_metabolome_1421	rLC_neg_mtb_6791833	milk_metabolome_1421__rLC_neg_mtb_6791833	Milk Metabolome	14-21 days	milk_metabolome	-0.0248756	0.0248756	0.251655	-0.00901426	0.512325	0.0584078	Higher in SVN	686.468	494	negative
milk_targeted_1421	Cit	milk_targeted_1421__Cit	Milk Targeted Metabolites	14-21 days	targeted_metabolites	-0.0248435	0.0248435	-0.102549	-0.364611	0.159514	0.441782	Lower in SVN
milk_targeted_1421	TG.18.3_34.0.	milk_targeted_1421__TG.18.3_34.0.	Milk Targeted Metabolites	14-21 days	targeted_metabolites	0.0247071	0.0247071	-0.0342273	-0.296536	0.228081	0.797481	Lower in SVN
milk_targeted_1421	Gln	milk_targeted_1421__Gln	Milk Targeted Metabolites	14-21 days	targeted_metabolites	-0.0245488	0.0245488	-0.273198	-0.533568	-0.0128278	0.0397999	Lower in SVN
milk_metabolome_1421	rLC_neg_mtb_5068516	milk_metabolome_1421__rLC_neg_mtb_5068516	Milk Metabolome	14-21 days	milk_metabolome	-0.0243086	0.0243086	0.0279737	-0.234345	0.290292	0.833886	Higher in SVN	553.377	368	negative
milk_metabolome_1421	rLC_neg_mtb_6791897	milk_metabolome_1421__rLC_neg_mtb_6791897	Milk Metabolome	14-21 days	milk_metabolome	-0.0240453	0.0240453	0.187643	-0.0737689	0.449055	0.158774	Higher in SVN	689.464	494	negative
maternal_prot_nav_12	Q9NXZ2	maternal_prot_nav_12__Q9NXZ2	Maternal Plasma Proteome (Naive)	1-2 months	prot_nav	0.02403	0.02403	0.176001	-0.0855228	0.437525	0.186338	Higher in SVN
maternal_taxa_12	CAG.83.sp900550615	maternal_taxa_12__CAG.83.sp900550615	Maternal Fecal Microbiome (Taxa)	1-2 months	stool_microbiome_maternal	0.0238068	0.0238068	-0.0121997	-0.274535	0.250135	0.927128	Lower in SVN
maternal_prot_dep_12	Q6UX71	maternal_prot_dep_12__Q6UX71	Maternal Plasma Proteome (Depleted)	1-2 months	prot_dep	-0.0237039	0.0237039	0.00714613	-0.255192	0.269484	0.957275	Higher in SVN
milk_macro_micro_1421	Nufa	milk_macro_micro_1421__Nufa	Milk Macro- and Micronutrients	14-21 days	macro_micronutrients	0.0236344	0.0236344	0.0648121	-0.197417	0.327041	0.626979	Higher in SVN
milk_metabolome_1421	rLC_neg_mtb_6055213	milk_metabolome_1421__rLC_neg_mtb_6055213	Milk Metabolome	14-21 days	milk_metabolome	-0.0228055	0.0228055	0.192637	-0.0687251	0.453999	0.14794	Higher in SVN	672.417	448	negative
milk_metabolome_1421	rLC_neg_mtb_6421357	milk_metabolome_1421__rLC_neg_mtb_6421357	Milk Metabolome	14-21 days	milk_metabolome	-0.0227606	0.0227606	0.361324	0.102439	0.620209	0.00639651	Higher in SVN	673.449	469	negative
milk_metabolome_1421	rLC_neg_mtb_6733469	milk_metabolome_1421__rLC_neg_mtb_6733469	Milk Metabolome	14-21 days	milk_metabolome	-0.022627	0.022627	0.194339	-0.0670059	0.455683	0.144379	Higher in SVN	770.487	496	negative
maternal_prot_nav_12	P00751	maternal_prot_nav_12__P00751	Maternal Plasma Proteome (Naive)	1-2 months	prot_nav	0.0224984	0.0224984	-0.0387817	-0.301081	0.223518	0.771236	Lower in SVN
maternal_taxa_12	Methanosphaera.stadtmanae	maternal_taxa_12__Methanosphaera.stadtmanae	Maternal Fecal Microbiome (Taxa)	1-2 months	stool_microbiome_maternal	0.0220993	0.0220993	-0.112898	-0.374902	0.149106	0.397046	Lower in SVN
milk_metabolome_1421	rLC_pos_mtb_1372578	milk_metabolome_1421__rLC_pos_mtb_1372578	Milk Metabolome	14-21 days	milk_metabolome	0.0218011	0.0218011	-0.0927588	-0.354872	0.169354	0.486623	Lower in SVN	633.903	126	positive
milk_hmo_1421	SUM_nmol/mL	milk_hmo_1421__SUM_nmol/mL	Milk HMOs	14-21 days	hmos	0.021762	0.021762	0.0520999	-0.210168	0.314368	0.696068	Higher in SVN
milk_metabolome_1421	rLC_neg_mtb_6368786	milk_metabolome_1421__rLC_neg_mtb_6368786	Milk Metabolome	14-21 days	milk_metabolome	-0.021724	0.021724	0.180306	-0.0811773	0.441789	0.175762	Higher in SVN	1150.84	469	negative
milk_macro_micro_1421	K	milk_macro_micro_1421__K	Milk Macro- and Micronutrients	14-21 days	macro_micronutrients	0.0216532	0.0216532	0.00471664	-0.257622	0.267055	0.971793	Higher in SVN
milk_metabolome_1421	rLC_neg_mtb_6030025	milk_metabolome_1421__rLC_neg_mtb_6030025	Milk Metabolome	14-21 days	milk_metabolome	-0.0216051	0.0216051	0.184768	-0.0766724	0.446208	0.165278	Higher in SVN	1094.77	446	negative
milk_metabolome_1421	rLC_neg_mtb_6030042	milk_metabolome_1421__rLC_neg_mtb_6030042	Milk Metabolome	14-21 days	milk_metabolome	-0.0215845	0.0215845	0.301109	0.0411638	0.561054	0.0233476	Higher in SVN	1095.77	448	negative
milk_targeted_1421	HexCer.d18.2.22.0.	milk_targeted_1421__HexCer.d18.2.22.0.	Milk Targeted Metabolites	14-21 days	targeted_metabolites	0.0214141	0.0214141	-0.0191027	-0.281432	0.243227	0.886124	Lower in SVN
maternal_gene_12	K21573	maternal_gene_12__K21573	Maternal Fecal Metagenome (Genes)	1-2 months	stool_gene_maternal	0.0210537	0.0210537	-0.0454805	-0.307765	0.216804	0.73311	Lower in SVN
maternal_gene_12	K02199	maternal_gene_12__K02199	Maternal Fecal Metagenome (Genes)	1-2 months	stool_gene_maternal	0.0209885	0.0209885	-0.175134	-0.436666	0.0863975	0.188522	Lower in SVN
milk_hmo_1421	LNFP II_nmol/mL	milk_hmo_1421__LNFP II_nmol/mL	Milk HMOs	14-21 days	hmos	-0.0209796	0.0209796	-0.0540228	-0.316285	0.20824	0.685437	Lower in SVN
milk_metabolome_1421	rLC_neg_mtb_4158835	milk_metabolome_1421__rLC_neg_mtb_4158835	Milk Metabolome	14-21 days	milk_metabolome	0.0208319	0.0208319	0.128228	-0.133679	0.390135	0.336006	Higher in SVN	623.668	314	negative
maternal_gene_12	K03559	maternal_gene_12__K03559	Maternal Fecal Metagenome (Genes)	1-2 months	stool_gene_maternal	0.0207261	0.0207261	0.0242881	-0.238035	0.286612	0.855514	Higher in SVN
milk_macro_micro_1421	B2	milk_macro_micro_1421__B2	Milk Macro- and Micronutrients	14-21 days	macro_micronutrients	0.020625	0.020625	0.0627544	-0.199481	0.32499	0.637964	Higher in SVN
maternal_prot_nav_12	O95954	maternal_prot_nav_12__O95954	Maternal Plasma Proteome (Naive)	1-2 months	prot_nav	-0.0206032	0.0206032	-0.180387	-0.441869	0.0810957	0.175568	Lower in SVN
maternal_prot_dep_12	P03952	maternal_prot_dep_12__P03952	Maternal Plasma Proteome (Depleted)	1-2 months	prot_dep	-0.0204934	0.0204934	-0.31676	-0.576449	-0.0570716	0.0169983	Lower in SVN
maternal_prot_dep_12	O95445	maternal_prot_dep_12__O95445	Maternal Plasma Proteome (Depleted)	1-2 months	prot_dep	-0.0204597	0.0204597	0.132216	-0.129663	0.394096	0.321166	Higher in SVN
milk_metabolome_1421	rLC_neg_mtb_4861437	milk_metabolome_1421__rLC_neg_mtb_4861437	Milk Metabolome	14-21 days	milk_metabolome	-0.0202491	0.0202491	0.0594258	-0.20282	0.321672	0.655901	Higher in SVN	612.473	353	negative
milk_taxa_1421	Streptococcus.sp68	milk_taxa_1421__Streptococcus.sp68	Milk Microbiome (Taxa)	14-21 days	milk_microbiome	-0.0201427	0.0201427	-0.164356	-0.425985	0.0972719	0.217273	Lower in SVN
maternal_taxa_12	Unknown_Holdemanella.1	maternal_taxa_12__Unknown_Holdemanella.1	Maternal Fecal Microbiome (Taxa)	1-2 months	stool_microbiome_maternal	0.0200341	0.0200341	0.0495454	-0.212729	0.31182	0.710283	Higher in SVN
milk_metabolome_1421	rLC_pos_mtb_4120832	milk_metabolome_1421__rLC_pos_mtb_4120832	Milk Metabolome	14-21 days	milk_metabolome	-0.0199964	0.0199964	0.0877522	-0.174384	0.349889	0.510467	Higher in SVN	509.408	281	positive
milk_metabolome_1421	rLC_pos_mtb_9964358	milk_metabolome_1421__rLC_pos_mtb_9964358	Milk Metabolome	14-21 days	milk_metabolome	0.0198778	0.0198778	-0.0519248	-0.314193	0.210343	0.697039	Lower in SVN	515.009	659	positive
milk_macro_micro_1421	a.tocopherol	milk_macro_micro_1421__a.tocopherol	Milk Macro- and Micronutrients	14-21 days	macro_micronutrients	0.0196013	0.0196013	0.00561092	-0.256727	0.267949	0.966448	Higher in SVN
milk_bioactive_1421	IgA	milk_bioactive_1421__IgA	Milk Bioactive Proteins	14-21 days	bioactive_proteins	0.0190424	0.0190424	0.173467	-0.0880799	0.435014	0.192777	Higher in SVN
milk_hmo_1421	LNnT_nmol/mL	milk_hmo_1421__LNnT_nmol/mL	Milk HMOs	14-21 days	hmos	0.0189381	0.0189381	-0.092685	-0.354798	0.169428	0.48697	Lower in SVN
milk_macro_micro_1421	FAD	milk_macro_micro_1421__FAD	Milk Macro- and Micronutrients	14-21 days	macro_micronutrients	0.0188534	0.0188534	0.0705601	-0.191648	0.332768	0.596733	Higher in SVN
milk_macro_micro_1421	PROTEIN	milk_macro_micro_1421__PROTEIN	Milk Macro- and Micronutrients	14-21 days	macro_micronutrients	0.0187514	0.0187514	0.0951571	-0.166944	0.357258	0.475417	Higher in SVN
milk_metabolome_1421	rLC_neg_mtb_5066597	milk_metabolome_1421__rLC_neg_mtb_5066597	Milk Metabolome	14-21 days	milk_metabolome	-0.0187183	0.0187183	0.0295681	-0.232748	0.291884	0.824567	Higher in SVN	386.194	368	negative
milk_targeted_1421	TG.18.3_35.2.	milk_targeted_1421__TG.18.3_35.2.	Milk Targeted Metabolites	14-21 days	targeted_metabolites	0.0186593	0.0186593	0.0778145	-0.184365	0.339994	0.559534	Higher in SVN
milk_metabolome_1421	rLC_neg_mtb_6361446	milk_metabolome_1421__rLC_neg_mtb_6361446	Milk Metabolome	14-21 days	milk_metabolome	-0.0185821	0.0185821	0.320654	0.0610307	0.580276	0.0156755	Higher in SVN	687.434	469	negative
maternal_prot_nav_12	P01717	maternal_prot_nav_12__P01717	Maternal Plasma Proteome (Naive)	1-2 months	prot_nav	0.0181481	0.0181481	-0.13813	-0.399967	0.123708	0.299962	Lower in SVN
milk_metabolome_1421	rLC_pos_mtb_4408963	milk_metabolome_1421__rLC_pos_mtb_4408963	Milk Metabolome	14-21 days	milk_metabolome	-0.018135	0.018135	0.0900887	-0.172037	0.352214	0.499264	Higher in SVN	258.215	312	positive
milk_metabolome_1421	rLC_neg_mtb_2419627	milk_metabolome_1421__rLC_neg_mtb_2419627	Milk Metabolome	14-21 days	milk_metabolome	0.0178083	0.0178083	-0.0325998	-0.294911	0.229711	0.806916	Lower in SVN	634.208	194	negative
milk_metabolome_1421	rLC_neg_mtb_6291603	milk_metabolome_1421__rLC_neg_mtb_6291603	Milk Metabolome	14-21 days	milk_metabolome	0.0177255	0.0177255	-0.259056	-0.519626	0.00151297	0.051336	Lower in SVN	195.027	463	negative
maternal_prot_dep_12	P19823	maternal_prot_dep_12__P19823	Maternal Plasma Proteome (Depleted)	1-2 months	prot_dep	-0.0175303	0.0175303	-0.0825762	-0.344736	0.179584	0.535742	Lower in SVN
milk_bioactive_1421	Calprotectin	milk_bioactive_1421__Calprotectin	Milk Bioactive Proteins	14-21 days	bioactive_proteins	-0.0174135	0.0174135	-0.0788346	-0.34101	0.183341	0.554394	Lower in SVN
maternal_gene_12	K18954	maternal_gene_12__K18954	Maternal Fecal Metagenome (Genes)	1-2 months	stool_gene_maternal	0.0173366	0.0173366	-0.119779	-0.38174	0.142183	0.368867	Lower in SVN
maternal_prot_dep_12	A8MT70	maternal_prot_dep_12__A8MT70	Maternal Plasma Proteome (Depleted)	1-2 months	prot_dep	-0.0166435	0.0166435	-0.100152	-0.362228	0.161923	0.452535	Lower in SVN
milk_taxa_1421	Flavisolibacter_B.tropicus.2	milk_taxa_1421__Flavisolibacter_B.tropicus.2	Milk Microbiome (Taxa)	14-21 days	milk_microbiome	-0.0161582	0.0161582	-0.117941	-0.379914	0.144033	0.37627	Lower in SVN
milk_taxa_1421	Dietzia.sp5	milk_taxa_1421__Dietzia.sp5	Milk Microbiome (Taxa)	14-21 days	milk_microbiome	-0.0160541	0.0160541	-0.084088	-0.346241	0.178065	0.528295	Lower in SVN
maternal_prot_nav_12	Q12805	maternal_prot_nav_12__Q12805	Maternal Plasma Proteome (Naive)	1-2 months	prot_nav	-0.015999	0.015999	-0.00523156	-0.26757	0.257107	0.968715	Lower in SVN
milk_metabolome_1421	rLC_neg_mtb_4192757	milk_metabolome_1421__rLC_neg_mtb_4192757	Milk Metabolome	14-21 days	milk_metabolome	0.015998	0.015998	0.174314	-0.0872253	0.435853	0.190607	Higher in SVN	663.186	316	negative
milk_metabolome_1421	rLC_neg_mtb_6791879	milk_metabolome_1421__rLC_neg_mtb_6791879	Milk Metabolome	14-21 days	milk_metabolome	-0.0159509	0.0159509	0.265484	0.00500429	0.525965	0.0457867	Higher in SVN	688.465	496	negative
milk_taxa_1421	Cellulomonas.sp15	milk_taxa_1421__Cellulomonas.sp15	Milk Microbiome (Taxa)	14-21 days	milk_microbiome	-0.015937	0.015937	-0.0839399	-0.346094	0.178214	0.529023	Lower in SVN
milk_taxa_1421	Staphylococcus.sp19	milk_taxa_1421__Staphylococcus.sp19	Milk Microbiome (Taxa)	14-21 days	milk_microbiome	-0.0159	0.0159	-0.0838916	-0.346046	0.178262	0.52926	Lower in SVN
milk_taxa_1421	Corynebacterium.aquatimens.4	milk_taxa_1421__Corynebacterium.aquatimens.4	Milk Microbiome (Taxa)	14-21 days	milk_microbiome	-0.0158282	0.0158282	-0.0837964	-0.345951	0.178358	0.529728	Lower in SVN
milk_targeted_1421	FA.20.3.	milk_targeted_1421__FA.20.3.	Milk Targeted Metabolites	14-21 days	targeted_metabolites	-0.015821	0.015821	0.317993	0.0583246	0.577661	0.0165694	Higher in SVN
milk_taxa_1421	Staphylococcus.sp2	milk_taxa_1421__Staphylococcus.sp2	Milk Microbiome (Taxa)	14-21 days	milk_microbiome	-0.0158097	0.0158097	-0.0837714	-0.345926	0.178383	0.52985	Lower in SVN
milk_taxa_1421	Unclassified.Enterococcaceae.sp1	milk_taxa_1421__Unclassified.Enterococcaceae.sp1	Milk Microbiome (Taxa)	14-21 days	milk_microbiome	0.0157814	0.0157814	0.0640947	-0.198136	0.326326	0.6308	Higher in SVN
maternal_taxa_12	UBA636.sp900546285	maternal_taxa_12__UBA636.sp900546285	Maternal Fecal Microbiome (Taxa)	1-2 months	stool_microbiome_maternal	-0.0157728	0.0157728	-0.104256	-0.366309	0.157798	0.434212	Lower in SVN
milk_taxa_1421	Unclassified.Pasteurellaceae.sp2	milk_taxa_1421__Unclassified.Pasteurellaceae.sp2	Milk Microbiome (Taxa)	14-21 days	milk_microbiome	-0.0157666	0.0157666	-0.143687	-0.405483	0.118109	0.2809	Lower in SVN
milk_metabolome_1421	rLC_neg_mtb_3608040	milk_metabolome_1421__rLC_neg_mtb_3608040	Milk Metabolome	14-21 days	milk_metabolome	-0.0157442	0.0157442	0.0859618	-0.176183	0.348107	0.519139	Higher in SVN	144.111	267	negative	E2572	C06423	Octanoic acid; Caprylic acid; Octylic acid
milk_metabolome_1421	rLC_pos_mtb_4572748	milk_metabolome_1421__rLC_pos_mtb_4572748	Milk Metabolome	14-21 days	milk_metabolome	-0.0153944	0.0153944	0.288151	0.028003	0.548299	0.0300626	Higher in SVN	551.408	306	positive
milk_targeted_1421	TG.16.0_32.0.	milk_targeted_1421__TG.16.0_32.0.	Milk Targeted Metabolites	14-21 days	targeted_metabolites	0.0153576	0.0153576	0.0791137	-0.183061	0.341288	0.552993	Higher in SVN
milk_targeted_1421	TG.16.0_34.0.	milk_targeted_1421__TG.16.0_34.0.	Milk Targeted Metabolites	14-21 days	targeted_metabolites	0.0152925	0.0152925	0.104001	-0.158053	0.366056	0.435334	Higher in SVN
milk_targeted_1421	TG.18.0_32.0.	milk_targeted_1421__TG.18.0_32.0.	Milk Targeted Metabolites	14-21 days	targeted_metabolites	0.0151467	0.0151467	-0.0726463	-0.334847	0.189554	0.585922	Lower in SVN
milk_metabolome_1421	rLC_neg_mtb_6053956	milk_metabolome_1421__rLC_neg_mtb_6053956	Milk Metabolome	14-21 days	milk_metabolome	-0.0148939	0.0148939	0.184735	-0.0767056	0.446176	0.165353	Higher in SVN	629.408	448	negative
milk_taxa_1421	Unclassified.Staphylococcaceae.sp1	milk_taxa_1421__Unclassified.Staphylococcaceae.sp1	Milk Microbiome (Taxa)	14-21 days	milk_microbiome	0.014863	0.014863	0.0351865	-0.22712	0.297493	0.791934	Higher in SVN
milk_taxa_1421	Staphylococcus.sp50	milk_taxa_1421__Staphylococcus.sp50	Milk Microbiome (Taxa)	14-21 days	milk_microbiome	-0.0148098	0.0148098	-0.131544	-0.393428	0.13034	0.323637	Lower in SVN
maternal_gene_12	K03832	maternal_gene_12__K03832	Maternal Fecal Metagenome (Genes)	1-2 months	stool_gene_maternal	0.0146746	0.0146746	-0.0342798	-0.296588	0.228028	0.797177	Lower in SVN
milk_metabolome_1421	rLC_neg_mtb_5791742	milk_metabolome_1421__rLC_neg_mtb_5791742	Milk Metabolome	14-21 days	milk_metabolome	0.0145429	0.0145429	0.0539626	-0.2083	0.316225	0.685769	Higher in SVN	360.259	434	negative
milk_metabolome_1421	rLC_neg_mtb_4821783	milk_metabolome_1421__rLC_neg_mtb_4821783	Milk Metabolome	14-21 days	milk_metabolome	-0.014497	0.014497	0.182626	-0.0788354	0.444087	0.170251	Higher in SVN	201.176	351	negative	E2056	C05452	3alpha,7alpha-Dihydroxy-5beta-cholestane; 5beta-Cholestane-3alpha,7alpha-diol
milk_metabolome_1421	rLC_neg_mtb_4733892	milk_metabolome_1421__rLC_neg_mtb_4733892	Milk Metabolome	14-21 days	milk_metabolome	-0.014393	0.014393	0.0158351	-0.246497	0.278168	0.905502	Higher in SVN	197.154	345	negative
milk_macro_micro_1421	PLP	milk_macro_micro_1421__PLP	Milk Macro- and Micronutrients	14-21 days	macro_micronutrients	0.0141744	0.0141744	-0.0050034	-0.267342	0.257335	0.970079	Lower in SVN
milk_taxa_1421	Unclassified.Micrococcaceae.sp18	milk_taxa_1421__Unclassified.Micrococcaceae.sp18	Milk Microbiome (Taxa)	14-21 days	milk_microbiome	0.0141072	0.0141072	0.0378862	-0.224415	0.300188	0.776377	Higher in SVN
milk_metabolome_1421	rLC_neg_mtb_7472403	milk_metabolome_1421__rLC_neg_mtb_7472403	Milk Metabolome	14-21 days	milk_metabolome	-0.0140581	0.0140581	0.135348	-0.126509	0.397205	0.309818	Higher in SVN	645.467	546	negative
milk_taxa_1421	Prevotella.copri	milk_taxa_1421__Prevotella.copri	Milk Microbiome (Taxa)	14-21 days	milk_microbiome	0.0138659	0.0138659	-0.0841738	-0.346327	0.177979	0.527874	Lower in SVN
maternal_prot_dep_12	P02749	maternal_prot_dep_12__P02749	Maternal Plasma Proteome (Depleted)	1-2 months	prot_dep	-0.013806	0.013806	-0.130792	-0.392682	0.131097	0.326415	Lower in SVN
milk_metabolome_1421	rLC_pos_mtb_4600180	milk_metabolome_1421__rLC_pos_mtb_4600180	Milk Metabolome	14-21 days	milk_metabolome	-0.0134661	0.0134661	0.0974336	-0.164656	0.359523	0.464911	Higher in SVN	286.247	0.32	positive
milk_metabolome_1421	rLC_neg_mtb_6389017	milk_metabolome_1421__rLC_neg_mtb_6389017	Milk Metabolome	14-21 days	milk_metabolome	-0.0133227	0.0133227	0.142298	-0.119509	0.404104	0.285586	Higher in SVN	657.439	469	negative
milk_hmo_1421	2'FL_nmol/mL	milk_hmo_1421__2'FL_nmol/mL	Milk HMOs	14-21 days	hmos	0.0132425	0.0132425	-0.072392	-0.334593	0.189809	0.587235	Lower in SVN
maternal_taxa_12	Odoribacter.splanchnicus	maternal_taxa_12__Odoribacter.splanchnicus	Maternal Fecal Microbiome (Taxa)	1-2 months	stool_microbiome_maternal	0.0131752	0.0131752	-0.0825106	-0.344671	0.17965	0.536066	Lower in SVN
milk_metabolome_1421	rLC_pos_mtb_4710913	milk_metabolome_1421__rLC_pos_mtb_4710913	Milk Metabolome	14-21 days	milk_metabolome	-0.0129202	0.0129202	0.144572	-0.117217	0.406361	0.27794	Higher in SVN	613.482	333	positive
maternal_gene_12	K02014	maternal_gene_12__K02014	Maternal Fecal Metagenome (Genes)	1-2 months	stool_gene_maternal	0.0128171	0.0128171	-0.012456	-0.274791	0.249879	0.925601	Lower in SVN
milk_metabolome_1421	rLC_neg_mtb_4126552	milk_metabolome_1421__rLC_neg_mtb_4126552	Milk Metabolome	14-21 days	milk_metabolome	0.0127361	0.0127361	-0.0412575	-0.303552	0.221037	0.757075	Lower in SVN	602.664	314	negative
milk_targeted_1421	TG.18.1_34.1.	milk_targeted_1421__TG.18.1_34.1.	Milk Targeted Metabolites	14-21 days	targeted_metabolites	0.0127281	0.0127281	-0.0468132	-0.309095	0.215468	0.725599	Lower in SVN
milk_hmo_1421	3FL_nmol/mL	milk_hmo_1421__3FL_nmol/mL	Milk HMOs	14-21 days	hmos	-0.012661	0.012661	-0.100716	-0.362789	0.161356	0.449992	Lower in SVN
milk_hmo_1421	LNFP I_nmol/mL	milk_hmo_1421__LNFP I_nmol/mL	Milk HMOs	14-21 days	hmos	0.0125188	0.0125188	0.103958	-0.158097	0.366013	0.435525	Higher in SVN
maternal_prot_dep_12	P01040	maternal_prot_dep_12__P01040	Maternal Plasma Proteome (Depleted)	1-2 months	prot_dep	0.0123428	0.0123428	-0.256901	-0.5175	0.00369769	0.0533177	Lower in SVN
milk_taxa_1421	Mogibacterium.diversum	milk_taxa_1421__Mogibacterium.diversum	Milk Microbiome (Taxa)	14-21 days	milk_microbiome	-0.0121893	0.0121893	-0.0840499	-0.346203	0.178103	0.528482	Lower in SVN
milk_taxa_1421	Nocardioides_A_392796.sp14	milk_taxa_1421__Nocardioides_A_392796.sp14	Milk Microbiome (Taxa)	14-21 days	milk_microbiome	-0.0121597	0.0121597	0.0274269	-0.234892	0.289746	0.837088	Higher in SVN
milk_taxa_1421	Nocardioides_A_392796.zeicaulis	milk_taxa_1421__Nocardioides_A_392796.zeicaulis	Milk Microbiome (Taxa)	14-21 days	milk_microbiome	-0.0121343	0.0121343	-0.0840019	-0.346155	0.178152	0.528718	Lower in SVN
milk_taxa_1421	Streptococcus.sp91	milk_taxa_1421__Streptococcus.sp91	Milk Microbiome (Taxa)	14-21 days	milk_microbiome	-0.012124	0.012124	-0.0839928	-0.346146	0.178161	0.528763	Lower in SVN
milk_taxa_1421	Romboutsia_B.ilealis.5	milk_taxa_1421__Romboutsia_B.ilealis.5	Milk Microbiome (Taxa)	14-21 days	milk_microbiome	-0.0120881	0.0120881	-0.083961	-0.346115	0.178193	0.528919	Lower in SVN
milk_taxa_1421	Streptococcus.sp52	milk_taxa_1421__Streptococcus.sp52	Milk Microbiome (Taxa)	14-21 days	milk_microbiome	-0.0120861	0.0120861	-0.0839592	-0.346113	0.178195	0.528928	Lower in SVN
milk_taxa_1421	Unclassified.Micrococcaceae.sp1	milk_taxa_1421__Unclassified.Micrococcaceae.sp1	Milk Microbiome (Taxa)	14-21 days	milk_microbiome	-0.0120726	0.0120726	0.023738	-0.238586	0.286062	0.858752	Higher in SVN
milk_taxa_1421	Alienimonas.sp1	milk_taxa_1421__Alienimonas.sp1	Milk Microbiome (Taxa)	14-21 days	milk_microbiome	-0.0120207	0.0120207	-0.0839004	-0.346054	0.178254	0.529217	Lower in SVN
milk_taxa_1421	Salibacterium.sp1	milk_taxa_1421__Salibacterium.sp1	Milk Microbiome (Taxa)	14-21 days	milk_microbiome	-0.0119936	0.0119936	-0.0838757	-0.34603	0.178278	0.529338	Lower in SVN
milk_taxa_1421	Methylobacterium.sp3	milk_taxa_1421__Methylobacterium.sp3	Milk Microbiome (Taxa)	14-21 days	milk_microbiome	-0.0119592	0.0119592	-0.117644	-0.379619	0.144331	0.377473	Lower in SVN
maternal_taxa_12	Alistipes_A.indistinctus	maternal_taxa_12__Alistipes_A.indistinctus	Maternal Fecal Microbiome (Taxa)	1-2 months	stool_microbiome_maternal	0.0119508	0.0119508	0.113658	-0.148341	0.375657	0.393871	Higher in SVN
milk_taxa_1421	Parafannyhessea.umbonata_A	milk_taxa_1421__Parafannyhessea.umbonata_A	Milk Microbiome (Taxa)	14-21 days	milk_microbiome	-0.0119505	0.0119505	-0.0838361	-0.34599	0.178318	0.529532	Lower in SVN
maternal_prot_dep_12	O43490	maternal_prot_dep_12__O43490	Maternal Plasma Proteome (Depleted)	1-2 months	prot_dep	-0.0119352	0.0119352	-0.038491	-0.300791	0.223809	0.772904	Lower in SVN
milk_taxa_1421	Clostridium_T.disporicum_203972.1	milk_taxa_1421__Clostridium_T.disporicum_203972.1	Milk Microbiome (Taxa)	14-21 days	milk_microbiome	-0.0119336	0.0119336	-0.0838205	-0.345975	0.178334	0.529609	Lower in SVN
maternal_taxa_12	Desulfovibrio.sp900319575	maternal_taxa_12__Desulfovibrio.sp900319575	Maternal Fecal Microbiome (Taxa)	1-2 months	stool_microbiome_maternal	-0.0118853	0.0118853	0.0225703	-0.239755	0.284896	0.865633	Higher in SVN
maternal_taxa_12	Unknown_ER4	maternal_taxa_12__Unknown_ER4	Maternal Fecal Microbiome (Taxa)	1-2 months	stool_microbiome_maternal	0.011834	0.011834	-0.265907	-0.526381	-0.00543228	0.0454406	Lower in SVN
maternal_prot_nav_12	O14975	maternal_prot_nav_12__O14975	Maternal Plasma Proteome (Naive)	1-2 months	prot_nav	-0.0118252	0.0118252	-0.158598	-0.420275	0.10308	0.233862	Lower in SVN
maternal_taxa_12	Unknown_CAG.83.13	maternal_taxa_12__Unknown_CAG.83.13	Maternal Fecal Microbiome (Taxa)	1-2 months	stool_microbiome_maternal	0.0117143	0.0117143	-0.177918	-0.439424	0.0835881	0.181573	Lower in SVN
milk_macro_micro_1421	Mo	milk_macro_micro_1421__Mo	Milk Macro- and Micronutrients	14-21 days	macro_micronutrients	-0.0116615	0.0116615	-0.0084226	-0.27076	0.253915	0.949653	Lower in SVN
milk_targeted_1421	TG.20.0_34.1.	milk_targeted_1421__TG.20.0_34.1.	Milk Targeted Metabolites	14-21 days	targeted_metabolites	0.011616	0.011616	-0.0577421	-0.319994	0.204509	0.665051	Lower in SVN
maternal_taxa_12	Unknown_Prevotella.2	maternal_taxa_12__Unknown_Prevotella.2	Maternal Fecal Microbiome (Taxa)	1-2 months	stool_microbiome_maternal	-0.0115404	0.0115404	-0.0219743	-0.284301	0.240352	0.869149	Lower in SVN
maternal_prot_dep_12	A0A0C4DH29	maternal_prot_dep_12__A0A0C4DH29	Maternal Plasma Proteome (Depleted)	1-2 months	prot_dep	-0.0111038	0.0111038	-0.122822	-0.384765	0.13912	0.356807	Lower in SVN
milk_taxa_1421	Aquabacter.spiritensis	milk_taxa_1421__Aquabacter.spiritensis	Milk Microbiome (Taxa)	14-21 days	milk_microbiome	0.0109979	0.0109979	0.136288	-0.125563	0.398138	0.306464	Higher in SVN
milk_metabolome_1421	rLC_neg_mtb_6359872	milk_metabolome_1421__rLC_neg_mtb_6359872	Milk Metabolome	14-21 days	milk_metabolome	-0.0109541	0.0109541	0.143096	-0.118705	0.404896	0.282888	Higher in SVN	589.439	469	negative
milk_taxa_1421	Chryseobacterium_796614.sp5	milk_taxa_1421__Chryseobacterium_796614.sp5	Milk Microbiome (Taxa)	14-21 days	milk_microbiome	0.0108669	0.0108669	-0.0524449	-0.314712	0.209822	0.694157	Lower in SVN
milk_metabolome_1421	rLC_neg_mtb_6759573	milk_metabolome_1421__rLC_neg_mtb_6759573	Milk Metabolome	14-21 days	milk_metabolome	-0.0108616	0.0108616	0.226832	-0.0341512	0.487816	0.0882105	Higher in SVN	635.427	496	negative
maternal_prot_nav_12	P16070	maternal_prot_nav_12__P16070	Maternal Plasma Proteome (Naive)	1-2 months	prot_nav	0.010848	0.010848	0.0815699	-0.180594	0.343734	0.540727	Higher in SVN
maternal_prot_dep_12	P09871	maternal_prot_dep_12__P09871	Maternal Plasma Proteome (Depleted)	1-2 months	prot_dep	-0.0107537	0.0107537	-0.12445	-0.386382	0.137481	0.35046	Lower in SVN
milk_metabolome_1421	rLC_neg_mtb_6388483	milk_metabolome_1421__rLC_neg_mtb_6388483	Milk Metabolome	14-21 days	milk_metabolome	-0.0107506	0.0107506	0.0808894	-0.181278	0.343057	0.544112	Higher in SVN	629.443	469	negative
milk_hmo_1421	Fuc_nmol/mL	milk_hmo_1421__Fuc_nmol/mL	Milk HMOs	14-21 days	hmos	-0.0107311	0.0107311	0.0219427	-0.240384	0.284269	0.869335	Higher in SVN
milk_hmo_1421	LNH_nmol/mL	milk_hmo_1421__LNH_nmol/mL	Milk HMOs	14-21 days	hmos	0.0106591	0.0106591	0.132219	-0.12966	0.394098	0.321157	Higher in SVN
milk_metabolome_1421	rLC_neg_mtb_1613565	milk_metabolome_1421__rLC_neg_mtb_1613565	Milk Metabolome	14-21 days	milk_metabolome	0.01062	0.01062	0.245993	-0.0147508	0.506737	0.0643456	Higher in SVN	1413.49	116	negative
maternal_taxa_12	QAMX01.sp004555605	maternal_taxa_12__QAMX01.sp004555605	Maternal Fecal Microbiome (Taxa)	1-2 months	stool_microbiome_maternal	0.0105375	0.0105375	-0.193689	-0.45504	0.0676625	0.145731	Lower in SVN
maternal_prot_dep_12	P01031	maternal_prot_dep_12__P01031	Maternal Plasma Proteome (Depleted)	1-2 months	prot_dep	-0.0105161	0.0105161	-0.146159	-0.407936	0.115618	0.272689	Lower in SVN
maternal_taxa_12	UBA7057.sp900542735	maternal_taxa_12__UBA7057.sp900542735	Maternal Fecal Microbiome (Taxa)	1-2 months	stool_microbiome_maternal	0.0104449	0.0104449	0.251577	-0.00909347	0.512247	0.0584866	Higher in SVN
milk_taxa_1421	Limosilactobacillus.gastricus	milk_taxa_1421__Limosilactobacillus.gastricus	Milk Microbiome (Taxa)	14-21 days	milk_microbiome	-0.0102915	0.0102915	-0.117234	-0.379212	0.144744	0.379141	Lower in SVN
infant_gene_12	K02835	infant_gene_12__K02835	Infant Fecal Metagenome (Genes)	1-2 months	stool_gene_infant	0.0102051	0.0102051	-0.00548068	-0.267819	0.256858	0.967226	Lower in SVN
milk_metabolome_1421	rLC_neg_mtb_6214468	milk_metabolome_1421__rLC_neg_mtb_6214468	Milk Metabolome	14-21 days	milk_metabolome	-0.0101914	0.0101914	0.213695	-0.047441	0.474831	0.108339	Higher in SVN	709.432	461	negative
milk_targeted_1421	C0	milk_targeted_1421__C0	Milk Targeted Metabolites	14-21 days	targeted_metabolites	0.010191	0.010191	0.118759	-0.143209	0.380728	0.372961	Higher in SVN
milk_taxa_1421	Legionella_D.sp9	milk_taxa_1421__Legionella_D.sp9	Milk Microbiome (Taxa)	14-21 days	milk_microbiome	0.0101621	0.0101621	0.0254539	-0.236868	0.287776	0.84866	Higher in SVN
milk_metabolome_1421	rLC_neg_mtb_7442591	milk_metabolome_1421__rLC_neg_mtb_7442591	Milk Metabolome	14-21 days	milk_metabolome	-0.0101593	0.0101593	0.17352	-0.0880268	0.435066	0.192642	Higher in SVN	670.514	544	negative
milk_metabolome_1421	rLC_neg_mtb_3153153	milk_metabolome_1421__rLC_neg_mtb_3153153	Milk Metabolome	14-21 days	milk_metabolome	0.0101491	0.0101491	-0.0417319	-0.304025	0.220561	0.754371	Lower in SVN	314.979	265	negative
milk_metabolome_1421	rLC_neg_mtb_1223512	milk_metabolome_1421__rLC_neg_mtb_1223512	Milk Metabolome	14-21 days	milk_metabolome	0.0100226	0.0100226	0.322785	0.063199	0.582372	0.01499	Higher in SVN	1630.54	93	negative
milk_taxa_1421	Limosilactobacillus.gastricus.3	milk_taxa_1421__Limosilactobacillus.gastricus.3	Milk Microbiome (Taxa)	14-21 days	milk_microbiome	-0.0100207	0.0100207	0.0152901	-0.247043	0.277623	0.90874	Higher in SVN
maternal_taxa_12	Unknown_UBA1234_2.4	maternal_taxa_12__Unknown_UBA1234_2.4	Maternal Fecal Microbiome (Taxa)	1-2 months	stool_microbiome_maternal	-0.0098088	0.0098088	0.108415	-0.153615	0.370445	0.416082	Higher in SVN
maternal_taxa_12	Prevotella.sp900548745	maternal_taxa_12__Prevotella.sp900548745	Maternal Fecal Microbiome (Taxa)	1-2 months	stool_microbiome_maternal	0.00972444	0.00972444	0.26192	0.00139011	0.52245	0.0487983	Higher in SVN
maternal_taxa_12	UBA4705.sp004554425	maternal_taxa_12__UBA4705.sp004554425	Maternal Fecal Microbiome (Taxa)	1-2 months	stool_microbiome_maternal	-0.00972345	0.00972345	-0.0860343	-0.348179	0.17611	0.518786	Lower in SVN
maternal_gene_12	3005008	maternal_gene_12__3005008	Maternal Fecal Metagenome (Genes)	1-2 months	stool_gene_maternal	-0.00969416	0.00969416	-0.237274	-0.49813	0.023581	0.0744504	Lower in SVN
maternal_taxa_12	Unknown_CAG.465_1.4	maternal_taxa_12__Unknown_CAG.465_1.4	Maternal Fecal Microbiome (Taxa)	1-2 months	stool_microbiome_maternal	-0.00966873	0.00966873	-0.174464	-0.436002	0.0870739	0.190224	Lower in SVN
milk_metabolome_1421	rLC_neg_mtb_10211935	milk_metabolome_1421__rLC_neg_mtb_10211935	Milk Metabolome	14-21 days	milk_metabolome	0.00966326	0.00966326	-0.0516194	-0.313888	0.21065	0.698734	Lower in SVN	345.059	711	negative
milk_taxa_1421	Paracoccus.sp18	milk_taxa_1421__Paracoccus.sp18	Milk Microbiome (Taxa)	14-21 days	milk_microbiome	0.00964976	0.00964976	-0.163793	-0.425426	0.0978397	0.218857	Lower in SVN
maternal_taxa_12	Unknown_RUG806	maternal_taxa_12__Unknown_RUG806	Maternal Fecal Microbiome (Taxa)	1-2 months	stool_microbiome_maternal	0.00945589	0.00945589	0.0992469	-0.162833	0.361327	0.456636	Higher in SVN
maternal_gene_12	K03585	maternal_gene_12__K03585	Maternal Fecal Metagenome (Genes)	1-2 months	stool_gene_maternal	0.00943405	0.00943405	-0.168076	-0.429671	0.0935201	0.207017	Lower in SVN
milk_taxa_1421	Pseudorhizobium.flavum	milk_taxa_1421__Pseudorhizobium.flavum	Milk Microbiome (Taxa)	14-21 days	milk_microbiome	-0.00940387	0.00940387	-0.164385	-0.426013	0.0972428	0.217192	Lower in SVN
milk_taxa_1421	Paracoccus.sp26	milk_taxa_1421__Paracoccus.sp26	Milk Microbiome (Taxa)	14-21 days	milk_microbiome	0.00936931	0.00936931	0.00409339	-0.258245	0.266432	0.975519	Higher in SVN
maternal_prot_nav_12	P15814	maternal_prot_nav_12__P15814	Maternal Plasma Proteome (Naive)	1-2 months	prot_nav	0.00935714	0.00935714	-0.30067	-0.560622	-0.0407175	0.023552	Lower in SVN
maternal_prot_dep_12	P05160	maternal_prot_dep_12__P05160	Maternal Plasma Proteome (Depleted)	1-2 months	prot_dep	-0.00930138	0.00930138	-0.0887409	-0.350873	0.173391	0.505711	Lower in SVN
milk_taxa_1421	Geobacillus.stearothermophilus.1	milk_taxa_1421__Geobacillus.stearothermophilus.1	Milk Microbiome (Taxa)	14-21 days	milk_microbiome	0.00928482	0.00928482	-0.218274	-0.479358	0.0428102	0.100949	Lower in SVN
milk_targeted_1421	PC.aa.C28.1	milk_targeted_1421__PC.aa.C28.1	Milk Targeted Metabolites	14-21 days	targeted_metabolites	-0.00915551	0.00915551	0.036829	-0.225474	0.299132	0.782458	Higher in SVN
milk_metabolome_1421	rLC_neg_mtb_4853110	milk_metabolome_1421__rLC_neg_mtb_4853110	Milk Metabolome	14-21 days	milk_metabolome	0.00910722	0.00910722	-0.121825	-0.383773	0.140124	0.360733	Lower in SVN	188.039	368	negative
maternal_taxa_12	Clostridium.sp900540255	maternal_taxa_12__Clostridium.sp900540255	Maternal Fecal Microbiome (Taxa)	1-2 months	stool_microbiome_maternal	-0.00909889	0.00909889	0.0999073	-0.162169	0.361984	0.453643	Higher in SVN
maternal_prot_dep_12	Q96IY4	maternal_prot_dep_12__Q96IY4	Maternal Plasma Proteome (Depleted)	1-2 months	prot_dep	-0.00906051	0.00906051	-0.127678	-0.389588	0.134232	0.338086	Lower in SVN
maternal_prot_nav_12	Q5T5C0	maternal_prot_nav_12__Q5T5C0	Maternal Plasma Proteome (Naive)	1-2 months	prot_nav	-0.00902071	0.00902071	-0.0303583	-0.292673	0.231957	0.819958	Lower in SVN
milk_targeted_1421	TG.22.1_32.5.	milk_targeted_1421__TG.22.1_32.5.	Milk Targeted Metabolites	14-21 days	targeted_metabolites	0.00900973	0.00900973	0.0593409	-0.202906	0.321587	0.656361	Higher in SVN
maternal_taxa_12	Oscillibacter.sp900544105	maternal_taxa_12__Oscillibacter.sp900544105	Maternal Fecal Microbiome (Taxa)	1-2 months	stool_microbiome_maternal	0.00899075	0.00899075	-0.152651	-0.414377	0.109075	0.251909	Lower in SVN
maternal_gene_12	K07165	maternal_gene_12__K07165	Maternal Fecal Metagenome (Genes)	1-2 months	stool_gene_maternal	0.00893126	0.00893126	-0.131357	-0.393242	0.130528	0.324328	Lower in SVN
milk_taxa_1421	Weissella_A_338544.sp3	milk_taxa_1421__Weissella_A_338544.sp3	Milk Microbiome (Taxa)	14-21 days	milk_microbiome	0.00891529	0.00891529	0.0708659	-0.191341	0.333073	0.595143	Higher in SVN
maternal_taxa_12	CAG.582.sp000435515	maternal_taxa_12__CAG.582.sp000435515	Maternal Fecal Microbiome (Taxa)	1-2 months	stool_microbiome_maternal	-0.00890644	0.00890644	-0.0417553	-0.304049	0.220538	0.754238	Lower in SVN
maternal_prot_dep_12	P06702	maternal_prot_dep_12__P06702	Maternal Plasma Proteome (Depleted)	1-2 months	prot_dep	-0.00886311	0.00886311	0.0290876	-0.233229	0.291404	0.827373	Higher in SVN
milk_macro_micro_1421	Cr	milk_macro_micro_1421__Cr	Milk Macro- and Micronutrients	14-21 days	macro_micronutrients	-0.00878793	0.00878793	0.231325	-0.0296042	0.492254	0.0820591	Higher in SVN
maternal_prot_dep_12	P00736	maternal_prot_dep_12__P00736	Maternal Plasma Proteome (Depleted)	1-2 months	prot_dep	-0.0085876	0.0085876	-0.143753	-0.405548	0.118043	0.280679	Lower in SVN
maternal_taxa_12	Unknown_UMGS1217.3	maternal_taxa_12__Unknown_UMGS1217.3	Maternal Fecal Microbiome (Taxa)	1-2 months	stool_microbiome_maternal	-0.00856986	0.00856986	0.0856664	-0.17648	0.347813	0.520577	Higher in SVN
infant_gene_12	K01588	infant_gene_12__K01588	Infant Fecal Metagenome (Genes)	1-2 months	stool_gene_infant	0.00852077	0.00852077	0.0690618	-0.193152	0.331276	0.604554	Higher in SVN
milk_taxa_1421	Bacillus_BU.sp000242895	milk_taxa_1421__Bacillus_BU.sp000242895	Milk Microbiome (Taxa)	14-21 days	milk_microbiome	-0.00851198	0.00851198	-0.0316208	-0.293934	0.230692	0.812606	Lower in SVN
maternal_prot_nav_12	O43866	maternal_prot_nav_12__O43866	Maternal Plasma Proteome (Naive)	1-2 months	prot_nav	-0.00843397	0.00843397	0.097383	-0.164707	0.359473	0.465144	Higher in SVN
milk_taxa_1421	Brevibacterium.ravenspurgense	milk_taxa_1421__Brevibacterium.ravenspurgense	Milk Microbiome (Taxa)	14-21 days	milk_microbiome	-0.00837341	0.00837341	-0.204068	-0.465311	0.0571739	0.125262	Lower in SVN
maternal_prot_dep_12	P05155	maternal_prot_dep_12__P05155	Maternal Plasma Proteome (Depleted)	1-2 months	prot_dep	-0.00835863	0.00835863	-0.180868	-0.442346	0.0806096	0.174414	Lower in SVN
maternal_taxa_12	Unknown_UMGS1840.1	maternal_taxa_12__Unknown_UMGS1840.1	Maternal Fecal Microbiome (Taxa)	1-2 months	stool_microbiome_maternal	0.00831296	0.00831296	-0.120868	-0.382823	0.141086	0.36452	Lower in SVN
milk_metabolome_1421	rLC_pos_mtb_6661233	milk_metabolome_1421__rLC_pos_mtb_6661233	Milk Metabolome	14-21 days	milk_metabolome	0.00829953	0.00829953	-0.216399	-0.477505	0.044706	0.103924	Lower in SVN	663.452	451	positive
milk_taxa_1421	Faecalibacterium.prausnitzii_C_71358.3	milk_taxa_1421__Faecalibacterium.prausnitzii_C_71358.3	Milk Microbiome (Taxa)	14-21 days	milk_microbiome	-0.00814789	0.00814789	0.018355	-0.243975	0.280685	0.890552	Higher in SVN
milk_taxa_1421	JC017.sp004296775.15	milk_taxa_1421__JC017.sp004296775.15	Milk Microbiome (Taxa)	14-21 days	milk_microbiome	-0.00813096	0.00813096	-0.3198	-0.579437	-0.0601624	0.0159576	Lower in SVN
maternal_taxa_12	V9D3004.sp002349525	maternal_taxa_12__V9D3004.sp002349525	Maternal Fecal Microbiome (Taxa)	1-2 months	stool_microbiome_maternal	0.00811564	0.00811564	-0.150345	-0.412089	0.1114	0.259161	Lower in SVN
maternal_taxa_12	Unknown_Zag111.2	maternal_taxa_12__Unknown_Zag111.2	Maternal Fecal Microbiome (Taxa)	1-2 months	stool_microbiome_maternal	-0.00808725	0.00808725	0.157859	-0.103824	0.419542	0.236052	Higher in SVN
maternal_taxa_12	RUG472.sp900545265	maternal_taxa_12__RUG472.sp900545265	Maternal Fecal Microbiome (Taxa)	1-2 months	stool_microbiome_maternal	0.00805076	0.00805076	-0.239841	-0.500663	0.0209824	0.0713505	Lower in SVN
milk_metabolome_1421	rLC_neg_mtb_1266184	milk_metabolome_1421__rLC_neg_mtb_1266184	Milk Metabolome	14-21 days	milk_metabolome	0.0077441	0.0077441	-0.0888425	-0.350974	0.173289	0.505223	Lower in SVN	660.205	105	negative
milk_macro_micro_1421	NMN	milk_macro_micro_1421__NMN	Milk Macro- and Micronutrients	14-21 days	macro_micronutrients	0.00768631	0.00768631	0.00699965	-0.255338	0.269337	0.95815	Higher in SVN
maternal_gene_12	K07263	maternal_gene_12__K07263	Maternal Fecal Metagenome (Genes)	1-2 months	stool_gene_maternal	0.00764607	0.00764607	-0.0639491	-0.326181	0.198283	0.631577	Lower in SVN
maternal_prot_dep_12	O00187	maternal_prot_dep_12__O00187	Maternal Plasma Proteome (Depleted)	1-2 months	prot_dep	-0.00758095	0.00758095	-0.177548	-0.439058	0.0839609	0.182484	Lower in SVN
maternal_taxa_12	Unknown_UBA644_2.1	maternal_taxa_12__Unknown_UBA644_2.1	Maternal Fecal Microbiome (Taxa)	1-2 months	stool_microbiome_maternal	-0.00738048	0.00738048	-0.0566914	-0.318946	0.205563	0.670786	Lower in SVN
maternal_taxa_12	Unknown_UBA644_2.3	maternal_taxa_12__Unknown_UBA644_2.3	Maternal Fecal Microbiome (Taxa)	1-2 months	stool_microbiome_maternal	0.00736519	0.00736519	0.0926171	-0.169497	0.354731	0.48729	Higher in SVN
maternal_prot_dep_12	P48740	maternal_prot_dep_12__P48740	Maternal Plasma Proteome (Depleted)	1-2 months	prot_dep	-0.00735554	0.00735554	-0.112902	-0.374906	0.149102	0.397028	Lower in SVN
milk_taxa_1421	Pseudomonas_E_650326.otitidis	milk_taxa_1421__Pseudomonas_E_650326.otitidis	Milk Microbiome (Taxa)	14-21 days	milk_microbiome	0.0072636	0.0072636	0.002355	-0.259984	0.264694	0.985914	Higher in SVN
milk_taxa_1421	Corynebacterium.amycolatum_A	milk_taxa_1421__Corynebacterium.amycolatum_A	Milk Microbiome (Taxa)	14-21 days	milk_microbiome	-0.00723367	0.00723367	-0.0140983	-0.276432	0.248236	0.915826	Lower in SVN
milk_metabolome_1421	rLC_pos_mtb_4743270	milk_metabolome_1421__rLC_pos_mtb_4743270	Milk Metabolome	14-21 days	milk_metabolome	-0.00716786	0.00716786	0.0165341	-0.245798	0.278866	0.901352	Higher in SVN	603.439	324	positive
milk_macro_micro_1421	T	milk_macro_micro_1421__T	Milk Macro- and Micronutrients	14-21 days	macro_micronutrients	0.00703855	0.00703855	-0.156613	-0.418306	0.105081	0.239781	Lower in SVN
milk_targeted_1421	HexCer.d18.2.23.0.	milk_targeted_1421__HexCer.d18.2.23.0.	Milk Targeted Metabolites	14-21 days	targeted_metabolites	0.0069947	0.0069947	0.0774843	-0.184697	0.339666	0.561203	Higher in SVN
maternal_prot_nav_12	P01591	maternal_prot_nav_12__P01591	Maternal Plasma Proteome (Naive)	1-2 months	prot_nav	-0.00659636	0.00659636	0.229846	-0.0311013	0.490793	0.0840449	Higher in SVN
milk_targeted_1421	FA.18.1.	milk_targeted_1421__FA.18.1.	Milk Targeted Metabolites	14-21 days	targeted_metabolites	-0.00652829	0.00652829	0.247441	-0.0132844	0.508166	0.0627822	Higher in SVN
milk_targeted_1421	DG.14.0_18.2.	milk_targeted_1421__DG.14.0_18.2.	Milk Targeted Metabolites	14-21 days	targeted_metabolites	0.00650827	0.00650827	0.192119	-0.0692485	0.453486	0.149037	Higher in SVN
infant_gene_12	K03550	infant_gene_12__K03550	Infant Fecal Metagenome (Genes)	1-2 months	stool_gene_infant	0.00649556	0.00649556	-0.0631018	-0.325336	0.199133	0.636104	Lower in SVN
milk_taxa_1421	Paracnuella.aquatica.2	milk_taxa_1421__Paracnuella.aquatica.2	Milk Microbiome (Taxa)	14-21 days	milk_microbiome	-0.00648873	0.00648873	-0.0228808	-0.285206	0.239445	0.863802	Lower in SVN
maternal_taxa_12	Unknown_RF16	maternal_taxa_12__Unknown_RF16	Maternal Fecal Microbiome (Taxa)	1-2 months	stool_microbiome_maternal	-0.00643845	0.00643845	-0.117144	-0.379122	0.144834	0.379506	Lower in SVN
infant_gene_12	K03168	infant_gene_12__K03168	Infant Fecal Metagenome (Genes)	1-2 months	stool_gene_infant	0.00641512	0.00641512	-0.036754	-0.299058	0.22555	0.782891	Lower in SVN
milk_metabolome_1421	rLC_pos_mtb_3908988	milk_metabolome_1421__rLC_pos_mtb_3908988	Milk Metabolome	14-21 days	milk_metabolome	-0.0063858	0.0063858	0.200862	-0.0604143	0.462139	0.131331	Higher in SVN	229.179	281	positive
milk_targeted_1421	TG.16.0_36.2.	milk_targeted_1421__TG.16.0_36.2.	Milk Targeted Metabolites	14-21 days	targeted_metabolites	0.00635069	0.00635069	-0.00277218	-0.265111	0.259567	0.983419	Lower in SVN
infant_gene_12	K02935	infant_gene_12__K02935	Infant Fecal Metagenome (Genes)	1-2 months	stool_gene_infant	0.00628949	0.00628949	-0.0355512	-0.297857	0.226755	0.789827	Lower in SVN
milk_metabolome_1421	rLC_neg_mtb_6052104	milk_metabolome_1421__rLC_neg_mtb_6052104	Milk Metabolome	14-21 days	milk_metabolome	-0.00619346	0.00619346	0.176007	-0.0855168	0.437531	0.186323	Higher in SVN	561.408	446	negative
maternal_taxa_12	Unknown_CAG.302_1.1	maternal_taxa_12__Unknown_CAG.302_1.1	Maternal Fecal Microbiome (Taxa)	1-2 months	stool_microbiome_maternal	-0.00615753	0.00615753	0.140057	-0.121766	0.40188	0.293255	Higher in SVN
milk_metabolome_1421	rLC_neg_mtb_6733486	milk_metabolome_1421__rLC_neg_mtb_6733486	Milk Metabolome	14-21 days	milk_metabolome	-0.00609287	0.00609287	0.150477	-0.111266	0.41222	0.258741	Higher in SVN	771.486	496	negative
milk_targeted_1421	DG.14.0_18.1.	milk_targeted_1421__DG.14.0_18.1.	Milk Targeted Metabolites	14-21 days	targeted_metabolites	0.00609173	0.00609173	0.225163	-0.0358407	0.486166	0.0905888	Higher in SVN
maternal_taxa_12	CAG.269.sp001916065	maternal_taxa_12__CAG.269.sp001916065	Maternal Fecal Microbiome (Taxa)	1-2 months	stool_microbiome_maternal	-0.00608765	0.00608765	0.0391377	-0.223161	0.301437	0.769195	Higher in SVN
maternal_prot_nav_12	Q6PEZ8	maternal_prot_nav_12__Q6PEZ8	Maternal Plasma Proteome (Naive)	1-2 months	prot_nav	0.00599922	0.00599922	-0.195514	-0.456847	0.0658185	0.141958	Lower in SVN
infant_gene_12	K01810	infant_gene_12__K01810	Infant Fecal Metagenome (Genes)	1-2 months	stool_gene_infant	0.00596022	0.00596022	-0.0601016	-0.322346	0.202143	0.652243	Lower in SVN
milk_targeted_1421	TG.18.1_35.2.	milk_targeted_1421__TG.18.1_35.2.	Milk Targeted Metabolites	14-21 days	targeted_metabolites	0.00590208	0.00590208	0.00234113	-0.259998	0.26468	0.985997	Higher in SVN
milk_metabolome_1421	rLC_neg_mtb_6299833	milk_metabolome_1421__rLC_neg_mtb_6299833	Milk Metabolome	14-21 days	milk_metabolome	-0.00589213	0.00589213	0.146349	-0.115427	0.408124	0.272065	Higher in SVN	573.417	469	negative
milk_taxa_1421	Thermomonas.carbonis	milk_taxa_1421__Thermomonas.carbonis	Milk Microbiome (Taxa)	14-21 days	milk_microbiome	-0.00588278	0.00588278	0.0856819	-0.176464	0.347828	0.520501	Higher in SVN
milk_taxa_1421	Chryseobacterium_796614.sp16	milk_taxa_1421__Chryseobacterium_796614.sp16	Milk Microbiome (Taxa)	14-21 days	milk_microbiome	-0.0058212	0.0058212	-0.165023	-0.426645	0.0965998	0.21541	Lower in SVN
maternal_taxa_12	UBA10281.sp900548285	maternal_taxa_12__UBA10281.sp900548285	Maternal Fecal Microbiome (Taxa)	1-2 months	stool_microbiome_maternal	-0.00577387	0.00577387	-0.0759037	-0.338091	0.186284	0.569223	Lower in SVN
maternal_taxa_12	Unknown_CAG.245.6	maternal_taxa_12__Unknown_CAG.245.6	Maternal Fecal Microbiome (Taxa)	1-2 months	stool_microbiome_maternal	0.0056671	0.0056671	-0.0719713	-0.334174	0.190232	0.58941	Lower in SVN
maternal_prot_dep_12	Q6PEZ8	maternal_prot_dep_12__Q6PEZ8	Maternal Plasma Proteome (Depleted)	1-2 months	prot_dep	-0.00566168	0.00566168	-0.0288685	-0.291186	0.233449	0.828653	Lower in SVN
maternal_prot_dep_12	P06703	maternal_prot_dep_12__P06703	Maternal Plasma Proteome (Depleted)	1-2 months	prot_dep	-0.0056465	0.0056465	0.22056	-0.0404976	0.481617	0.0974115	Higher in SVN
maternal_prot_nav_12	P00740	maternal_prot_nav_12__P00740	Maternal Plasma Proteome (Naive)	1-2 months	prot_nav	-0.00560571	0.00560571	-0.0956387	-0.357737	0.16646	0.473184	Lower in SVN
maternal_prot_nav_12	P04083	maternal_prot_nav_12__P04083	Maternal Plasma Proteome (Naive)	1-2 months	prot_nav	0.00556867	0.00556867	-0.0840976	-0.346251	0.178056	0.528248	Lower in SVN
milk_hmo_1421	DSLNH_nmol/mL	milk_hmo_1421__DSLNH_nmol/mL	Milk HMOs	14-21 days	hmos	-0.00545462	0.00545462	-0.338293	-0.597607	-0.0789794	0.0107467	Lower in SVN
maternal_taxa_12	Unknown_Clostridia	maternal_taxa_12__Unknown_Clostridia	Maternal Fecal Microbiome (Taxa)	1-2 months	stool_microbiome_maternal	0.00544862	0.00544862	-0.0411238	-0.303418	0.221171	0.757838	Lower in SVN
maternal_gene_12	CBM37_0	maternal_gene_12__CBM37_0	Maternal Fecal Metagenome (Genes)	1-2 months	stool_gene_maternal	0.005421	0.005421	0.0135696	-0.248765	0.275904	0.918972	Higher in SVN
milk_taxa_1421	Unclassified.Burkholderiaceae_A_592522.sp23	milk_taxa_1421__Unclassified.Burkholderiaceae_A_592522.sp23	Milk Microbiome (Taxa)	14-21 days	milk_microbiome	0.0054042	0.0054042	-0.138372	-0.400207	0.123464	0.299113	Lower in SVN
maternal_prot_dep_12	Q8IW92	maternal_prot_dep_12__Q8IW92	Maternal Plasma Proteome (Depleted)	1-2 months	prot_dep	0.00538577	0.00538577	0.189358	-0.0720367	0.450753	0.154987	Higher in SVN
milk_taxa_1421	Granulicatella.elegans	milk_taxa_1421__Granulicatella.elegans	Milk Microbiome (Taxa)	14-21 days	milk_microbiome	-0.00537834	0.00537834	0.0859554	-0.176189	0.3481	0.51917	Higher in SVN
milk_targeted_1421	HexCer.d18.1.14.0.	milk_targeted_1421__HexCer.d18.1.14.0.	Milk Targeted Metabolites	14-21 days	targeted_metabolites	-0.00537348	0.00537348	-0.123307	-0.385247	0.138632	0.354909	Lower in SVN
milk_metabolome_1421	rLC_pos_mtb_4504937	milk_metabolome_1421__rLC_pos_mtb_4504937	Milk Metabolome	14-21 days	milk_metabolome	-0.00535416	0.00535416	0.053647	-0.208616	0.31591	0.68751	Higher in SVN	497.448	306	positive
infant_gene_12	K01776	infant_gene_12__K01776	Infant Fecal Metagenome (Genes)	1-2 months	stool_gene_infant	0.00533269	0.00533269	-0.0335213	-0.295831	0.228788	0.80157	Lower in SVN
milk_taxa_1421	Pseudonocardia.sp16	milk_taxa_1421__Pseudonocardia.sp16	Milk Microbiome (Taxa)	14-21 days	milk_microbiome	-0.00531435	0.00531435	-0.0331351	-0.295445	0.229175	0.80381	Lower in SVN
milk_taxa_1421	Actinomyces.timonensis	milk_taxa_1421__Actinomyces.timonensis	Milk Microbiome (Taxa)	14-21 days	milk_microbiome	-0.00530376	0.00530376	-0.185401	-0.446835	0.0760331	0.163829	Lower in SVN
milk_metabolome_1421	rLC_neg_mtb_6577014	milk_metabolome_1421__rLC_neg_mtb_6577014	Milk Metabolome	14-21 days	milk_metabolome	-0.00527963	0.00527963	0.193029	-0.0683287	0.454387	0.147113	Higher in SVN	779.474	484	negative
maternal_gene_12	K20567	maternal_gene_12__K20567	Maternal Fecal Metagenome (Genes)	1-2 months	stool_gene_maternal	0.00525211	0.00525211	-0.109076	-0.371102	0.15295	0.41324	Lower in SVN
maternal_taxa_12	Unknown_CAG.433_2	maternal_taxa_12__Unknown_CAG.433_2	Maternal Fecal Microbiome (Taxa)	1-2 months	stool_microbiome_maternal	-0.00524525	0.00524525	0.134823	-0.127038	0.396684	0.311702	Higher in SVN
maternal_taxa_12	CAG.180.sp000432435	maternal_taxa_12__CAG.180.sp000432435	Maternal Fecal Microbiome (Taxa)	1-2 months	stool_microbiome_maternal	0.00523403	0.00523403	0.192295	-0.06907	0.453661	0.148662	Higher in SVN
milk_metabolome_1421	rLC_neg_mtb_4185703	milk_metabolome_1421__rLC_neg_mtb_4185703	Milk Metabolome	14-21 days	milk_metabolome	0.00523321	0.00523321	0.00673609	-0.255602	0.269074	0.959725	Higher in SVN	275.057	0.3	negative
maternal_taxa_12	Unknown_Duodenibacillus	maternal_taxa_12__Unknown_Duodenibacillus	Maternal Fecal Microbiome (Taxa)	1-2 months	stool_microbiome_maternal	-0.00521069	0.00521069	0.0919017	-0.170215	0.354019	0.490662	Higher in SVN
maternal_gene_12	K04085	maternal_gene_12__K04085	Maternal Fecal Metagenome (Genes)	1-2 months	stool_gene_maternal	0.00519294	0.00519294	-0.150985	-0.412724	0.110754	0.257133	Lower in SVN
maternal_taxa_12	CAG.170.sp900555665	maternal_taxa_12__CAG.170.sp900555665	Maternal Fecal Microbiome (Taxa)	1-2 months	stool_microbiome_maternal	-0.00517604	0.00517604	-0.178787	-0.440285	0.0827102	0.17944	Lower in SVN
maternal_prot_nav_12	Q96ED9	maternal_prot_nav_12__Q96ED9	Maternal Plasma Proteome (Naive)	1-2 months	prot_nav	-0.00507261	0.00507261	0.236225	-0.0246433	0.497094	0.0757489	Higher in SVN
milk_taxa_1421	Turicibacter.sanguinis	milk_taxa_1421__Turicibacter.sanguinis	Milk Microbiome (Taxa)	14-21 days	milk_microbiome	0.00499235	0.00499235	-0.160207	-0.42187	0.101457	0.229139	Lower in SVN
milk_metabolome_1421	rLC_neg_mtb_6793928	milk_metabolome_1421__rLC_neg_mtb_6793928	Milk Metabolome	14-21 days	milk_metabolome	-0.00498848	0.00498848	0.193954	-0.067395	0.455302	0.145179	Higher in SVN	800.479	494	negative
infant_gene_12	K02996	infant_gene_12__K02996	Infant Fecal Metagenome (Genes)	1-2 months	stool_gene_infant	0.00497832	0.00497832	-0.00653318	-0.268871	0.255805	0.960937	Lower in SVN
maternal_gene_12	K14155	maternal_gene_12__K14155	Maternal Fecal Metagenome (Genes)	1-2 months	stool_gene_maternal	-0.00488331	0.00488331	-0.146459	-0.408234	0.115316	0.271703	Lower in SVN
maternal_taxa_12	CAG.83.sp900313295	maternal_taxa_12__CAG.83.sp900313295	Maternal Fecal Microbiome (Taxa)	1-2 months	stool_microbiome_maternal	0.00487843	0.00487843	0.0400549	-0.222242	0.302352	0.763944	Higher in SVN
milk_targeted_1421	DG.16.0_20.3.	milk_targeted_1421__DG.16.0_20.3.	Milk Targeted Metabolites	14-21 days	targeted_metabolites	0.00487614	0.00487614	0.326127	0.0665987	0.585656	0.0139682	Higher in SVN
milk_metabolome_1421	rLC_neg_mtb_6361660	milk_metabolome_1421__rLC_neg_mtb_6361660	Milk Metabolome	14-21 days	milk_metabolome	-0.00486401	0.00486401	0.219437	-0.0416333	0.480508	0.0991359	Higher in SVN	701.447	469	negative
maternal_taxa_12	Unknown_CAG.269.4	maternal_taxa_12__Unknown_CAG.269.4	Maternal Fecal Microbiome (Taxa)	1-2 months	stool_microbiome_maternal	-0.00477836	0.00477836	0.224227	-0.036787	0.485242	0.0919431	Higher in SVN
maternal_prot_dep_12	P04070	maternal_prot_dep_12__P04070	Maternal Plasma Proteome (Depleted)	1-2 months	prot_dep	-0.00475957	0.00475957	-0.0182569	-0.280587	0.244073	0.891134	Lower in SVN
maternal_gene_12	K00926	maternal_gene_12__K00926	Maternal Fecal Metagenome (Genes)	1-2 months	stool_gene_maternal	0.00469815	0.00469815	-0.18128	-0.442754	0.0801942	0.173433	Lower in SVN
maternal_prot_nav_12	A0A075B6I4	maternal_prot_nav_12__A0A075B6I4	Maternal Plasma Proteome (Naive)	1-2 months	prot_nav	-0.00469675	0.00469675	-0.0364013	-0.298706	0.225903	0.784923	Lower in SVN
milk_targeted_1421	TG.16.0_35.2.	milk_targeted_1421__TG.16.0_35.2.	Milk Targeted Metabolites	14-21 days	targeted_metabolites	0.00460046	0.00460046	0.101778	-0.160289	0.363844	0.445225	Higher in SVN
infant_gene_12	K08316	infant_gene_12__K08316	Infant Fecal Metagenome (Genes)	1-2 months	stool_gene_infant	0.00459433	0.00459433	-0.0827431	-0.344902	0.179416	0.534917	Lower in SVN
milk_taxa_1421	Dorea_A.longicatena	milk_taxa_1421__Dorea_A.longicatena	Milk Microbiome (Taxa)	14-21 days	milk_microbiome	-0.00456981	0.00456981	0.290086	0.0299682	0.550204	0.0289652	Higher in SVN
milk_taxa_1421	Elizabethkingia.sp1	milk_taxa_1421__Elizabethkingia.sp1	Milk Microbiome (Taxa)	14-21 days	milk_microbiome	-0.00456944	0.00456944	-0.165669	-0.427286	0.0959475	0.213612	Lower in SVN
maternal_prot_nav_12	Q9H257	maternal_prot_nav_12__Q9H257	Maternal Plasma Proteome (Naive)	1-2 months	prot_nav	0.00455693	0.00455693	0.227308	-0.0336698	0.488285	0.0875423	Higher in SVN
milk_taxa_1421	Myxococcus_463634.sp1	milk_taxa_1421__Myxococcus_463634.sp1	Milk Microbiome (Taxa)	14-21 days	milk_microbiome	-0.00451035	0.00451035	0.0861749	-0.175969	0.348319	0.518103	Higher in SVN
milk_taxa_1421	Salicibibacter.kimchii	milk_taxa_1421__Salicibibacter.kimchii	Milk Microbiome (Taxa)	14-21 days	milk_microbiome	-0.00451035	0.00451035	0.0889381	-0.173193	0.351069	0.504765	Higher in SVN
maternal_prot_dep_12	P23142	maternal_prot_dep_12__P23142	Maternal Plasma Proteome (Depleted)	1-2 months	prot_dep	0.00450842	0.00450842	0.0643707	-0.197859	0.326601	0.629329	Higher in SVN
maternal_taxa_12	Unknown_CAG.83.9	maternal_taxa_12__Unknown_CAG.83.9	Maternal Fecal Microbiome (Taxa)	1-2 months	stool_microbiome_maternal	0.00449582	0.00449582	-0.122438	-0.384382	0.139507	0.358318	Lower in SVN
milk_taxa_1421	Gordonia_B_376796.sp5	milk_taxa_1421__Gordonia_B_376796.sp5	Milk Microbiome (Taxa)	14-21 days	milk_microbiome	-0.00447228	0.00447228	0.210793	-0.0503758	0.471962	0.11324	Higher in SVN
milk_taxa_1421	Flavisolibacter_B.tropicus	milk_taxa_1421__Flavisolibacter_B.tropicus	Milk Microbiome (Taxa)	14-21 days	milk_microbiome	-0.00447228	0.00447228	0.066617	-0.195605	0.328839	0.617411	Higher in SVN
milk_taxa_1421	Rhodococcus_C_375578.sp2	milk_taxa_1421__Rhodococcus_C_375578.sp2	Milk Microbiome (Taxa)	14-21 days	milk_microbiome	-0.00447228	0.00447228	0.224185	-0.0368304	0.485199	0.0920057	Higher in SVN
milk_taxa_1421	Urinicoccus.timonensis.1	milk_taxa_1421__Urinicoccus.timonensis.1	Milk Microbiome (Taxa)	14-21 days	milk_microbiome	-0.00447228	0.00447228	0.210793	-0.0503758	0.471962	0.11324	Higher in SVN
maternal_gene_12	K12373	maternal_gene_12__K12373	Maternal Fecal Metagenome (Genes)	1-2 months	stool_gene_maternal	0.00441855	0.00441855	-0.0538871	-0.31615	0.208376	0.686186	Lower in SVN
milk_macro_micro_1421	PA	milk_macro_micro_1421__PA	Milk Macro- and Micronutrients	14-21 days	macro_micronutrients	-0.00441146	0.00441146	0.138068	-0.12377	0.399905	0.300179	Higher in SVN
milk_metabolome_1421	rLC_neg_mtb_2382194	milk_metabolome_1421__rLC_neg_mtb_2382194	Milk Metabolome	14-21 days	milk_metabolome	0.00440383	0.00440383	-0.20499	-0.466223	0.0562419	0.123557	Lower in SVN	146.081	0.18	negative
maternal_taxa_12	Unknown_ER4.8	maternal_taxa_12__Unknown_ER4.8	Maternal Fecal Microbiome (Taxa)	1-2 months	stool_microbiome_maternal	-0.00440285	0.00440285	-0.160216	-0.421879	0.101448	0.229113	Lower in SVN
milk_taxa_1421	VYCW01.sp009842325.1	milk_taxa_1421__VYCW01.sp009842325.1	Milk Microbiome (Taxa)	14-21 days	milk_microbiome	-0.00439222	0.00439222	0.211452	-0.0497096	0.472613	0.112112	Higher in SVN
milk_targeted_1421	TG.17.0_36.3.	milk_targeted_1421__TG.17.0_36.3.	Milk Targeted Metabolites	14-21 days	targeted_metabolites	0.00436968	0.00436968	0.0202058	-0.242123	0.282534	0.879596	Higher in SVN
infant_gene_12	K00554	infant_gene_12__K00554	Infant Fecal Metagenome (Genes)	1-2 months	stool_gene_infant	0.0043533	0.0043533	-0.0256463	-0.287968	0.236676	0.847531	Lower in SVN
milk_taxa_1421	Croceibacterium_484881.sp4	milk_taxa_1421__Croceibacterium_484881.sp4	Milk Microbiome (Taxa)	14-21 days	milk_microbiome	-0.00435178	0.00435178	0.211766	-0.0493923	0.472923	0.111578	Higher in SVN
infant_gene_12	K00962	infant_gene_12__K00962	Infant Fecal Metagenome (Genes)	1-2 months	stool_gene_infant	0.00431925	0.00431925	-0.080351	-0.34252	0.181818	0.546797	Lower in SVN
milk_metabolome_1421	rLC_neg_mtb_6057175	milk_metabolome_1421__rLC_neg_mtb_6057175	Milk Metabolome	14-21 days	milk_metabolome	-0.00427853	0.00427853	0.36532	0.106513	0.624128	0.00582807	Higher in SVN	744.416	448	negative
milk_hmo_1421	DFLNT_nmol/mL	milk_hmo_1421__DFLNT_nmol/mL	Milk HMOs	14-21 days	hmos	-0.0042375	0.0042375	0.167959	-0.0936374	0.429556	0.207332	Higher in SVN
milk_metabolome_1421	rLC_neg_mtb_6087749	milk_metabolome_1421__rLC_neg_mtb_6087749	Milk Metabolome	14-21 days	milk_metabolome	-0.00417576	0.00417576	0.192686	-0.0686754	0.454048	0.147836	Higher in SVN	601.412	444	negative
milk_taxa_1421	Streptococcus.sp93	milk_taxa_1421__Streptococcus.sp93	Milk Microbiome (Taxa)	14-21 days	milk_microbiome	-0.00417433	0.00417433	0.213004	-0.0481398	0.474148	0.10949	Higher in SVN
infant_gene_12	K01756	infant_gene_12__K01756	Infant Fecal Metagenome (Genes)	1-2 months	stool_gene_infant	0.0041498	0.0041498	-0.0237538	-0.286078	0.238571	0.858659	Lower in SVN
maternal_prot_dep_12	P13796	maternal_prot_dep_12__P13796	Maternal Plasma Proteome (Depleted)	1-2 months	prot_dep	-0.00414374	0.00414374	-0.180456	-0.441938	0.0810258	0.175402	Lower in SVN
maternal_taxa_12	Unknown_CAG.115.5	maternal_taxa_12__Unknown_CAG.115.5	Maternal Fecal Microbiome (Taxa)	1-2 months	stool_microbiome_maternal	-0.00413016	0.00413016	-0.0125392	-0.274874	0.249796	0.925106	Lower in SVN
milk_taxa_1421	Bacillus_P_294101.sp2	milk_taxa_1421__Bacillus_P_294101.sp2	Milk Microbiome (Taxa)	14-21 days	milk_microbiome	-0.00412581	0.00412581	-0.0799032	-0.342074	0.182268	0.549035	Lower in SVN
maternal_gene_12	K07126	maternal_gene_12__K07126	Maternal Fecal Metagenome (Genes)	1-2 months	stool_gene_maternal	0.00412523	0.00412523	-0.126559	-0.388477	0.135359	0.342344	Lower in SVN
milk_macro_micro_1421	Mg	milk_macro_micro_1421__Mg	Milk Macro- and Micronutrients	14-21 days	macro_micronutrients	-0.0040812	0.0040812	0.0720066	-0.190196	0.334209	0.589227	Higher in SVN
maternal_taxa_12	RC9.sp900545245	maternal_taxa_12__RC9.sp900545245	Maternal Fecal Microbiome (Taxa)	1-2 months	stool_microbiome_maternal	0.00405435	0.00405435	0.156785	-0.104907	0.418477	0.239263	Higher in SVN
maternal_gene_12	K03455	maternal_gene_12__K03455	Maternal Fecal Metagenome (Genes)	1-2 months	stool_gene_maternal	0.00399226	0.00399226	-0.115469	-0.377458	0.146519	0.386368	Lower in SVN
maternal_gene_12	K15572	maternal_gene_12__K15572	Maternal Fecal Metagenome (Genes)	1-2 months	stool_gene_maternal	0.00396397	0.00396397	-0.106682	-0.368722	0.155358	0.423581	Lower in SVN
milk_taxa_1421	Staphylococcus.sp80	milk_taxa_1421__Staphylococcus.sp80	Milk Microbiome (Taxa)	14-21 days	milk_microbiome	-0.00396199	0.00396199	0.00314813	-0.259191	0.265487	0.981171	Higher in SVN
maternal_prot_nav_12	P02748	maternal_prot_nav_12__P02748	Maternal Plasma Proteome (Naive)	1-2 months	prot_nav	0.00394573	0.00394573	-0.103922	-0.365977	0.158133	0.435685	Lower in SVN
maternal_prot_nav_12	Q6ZN19	maternal_prot_nav_12__Q6ZN19	Maternal Plasma Proteome (Naive)	1-2 months	prot_nav	-0.00390663	0.00390663	0.0212762	-0.241051	0.283603	0.87327	Higher in SVN
infant_gene_12	K01945	infant_gene_12__K01945	Infant Fecal Metagenome (Genes)	1-2 months	stool_gene_infant	0.00390381	0.00390381	-0.00210903	-0.264448	0.26023	0.987385	Lower in SVN
maternal_prot_dep_12	Q13451	maternal_prot_dep_12__Q13451	Maternal Plasma Proteome (Depleted)	1-2 months	prot_dep	-0.00387185	0.00387185	-0.0715967	-0.333801	0.190608	0.59135	Lower in SVN
maternal_taxa_12	CAG.115.sp000432175	maternal_taxa_12__CAG.115.sp000432175	Maternal Fecal Microbiome (Taxa)	1-2 months	stool_microbiome_maternal	0.00386399	0.00386399	0.0854437	-0.176703	0.347591	0.521662	Higher in SVN
maternal_taxa_12	Unknown_UBA7057	maternal_taxa_12__Unknown_UBA7057	Maternal Fecal Microbiome (Taxa)	1-2 months	stool_microbiome_maternal	-0.00385375	0.00385375	-0.148488	-0.410247	0.113271	0.265104	Lower in SVN
maternal_taxa_12	Unknown_CAG.170.10	maternal_taxa_12__Unknown_CAG.170.10	Maternal Fecal Microbiome (Taxa)	1-2 months	stool_microbiome_maternal	0.00384089	0.00384089	-0.23312	-0.494027	0.0277871	0.0797001	Lower in SVN
milk_metabolome_1421	rLC_neg_mtb_6390662	milk_metabolome_1421__rLC_neg_mtb_6390662	Milk Metabolome	14-21 days	milk_metabolome	-0.00383538	0.00383538	0.277417	0.0171079	0.537725	0.0368149	Higher in SVN	730.442	473	negative
milk_taxa_1421	Paracoccus.sp10	milk_taxa_1421__Paracoccus.sp10	Milk Microbiome (Taxa)	14-21 days	milk_microbiome	-0.00383137	0.00383137	-0.107563	-0.369598	0.154472	0.419757	Lower in SVN
infant_gene_12	K09710	infant_gene_12__K09710	Infant Fecal Metagenome (Genes)	1-2 months	stool_gene_infant	0.00381626	0.00381626	-0.0562614	-0.318517	0.205995	0.673138	Lower in SVN
milk_taxa_1421	Massilia.sp10	milk_taxa_1421__Massilia.sp10	Milk Microbiome (Taxa)	14-21 days	milk_microbiome	0.00378855	0.00378855	-0.0260339	-0.288355	0.236287	0.845255	Lower in SVN
maternal_gene_12	K02429	maternal_gene_12__K02429	Maternal Fecal Metagenome (Genes)	1-2 months	stool_gene_maternal	0.0037341	0.0037341	0.110807	-0.15121	0.372823	0.40586	Higher in SVN
maternal_taxa_12	UMGS1532.sp900552605	maternal_taxa_12__UMGS1532.sp900552605	Maternal Fecal Microbiome (Taxa)	1-2 months	stool_microbiome_maternal	-0.00368088	0.00368088	-0.089017	-0.351148	0.173114	0.504386	Lower in SVN
milk_taxa_1421	Acidisphaera.rubrifaciens	milk_taxa_1421__Acidisphaera.rubrifaciens	Milk Microbiome (Taxa)	14-21 days	milk_microbiome	-0.00363067	0.00363067	-0.0835364	-0.345692	0.178619	0.531006	Lower in SVN
milk_taxa_1421	Anaerococcus.sp36	milk_taxa_1421__Anaerococcus.sp36	Milk Microbiome (Taxa)	14-21 days	milk_microbiome	-0.00362093	0.00362093	-0.235527	-0.496404	0.0253505	0.0766235	Lower in SVN
milk_taxa_1421	Lachnoclostridium_A_184689.sp900078195	milk_taxa_1421__Lachnoclostridium_A_184689.sp900078195	Milk Microbiome (Taxa)	14-21 days	milk_microbiome	-0.00361281	0.00361281	-0.0835958	-0.345751	0.17856	0.530714	Lower in SVN
maternal_prot_nav_12	P10643	maternal_prot_nav_12__P10643	Maternal Plasma Proteome (Naive)	1-2 months	prot_nav	0.00361076	0.00361076	0.108991	-0.153036	0.371018	0.413605	Higher in SVN
maternal_taxa_12	Unknown_RUG410	maternal_taxa_12__Unknown_RUG410	Maternal Fecal Microbiome (Taxa)	1-2 months	stool_microbiome_maternal	0.00360696	0.00360696	0.120912	-0.141043	0.382867	0.364347	Higher in SVN
maternal_taxa_12	Unknown_Angelakisella	maternal_taxa_12__Unknown_Angelakisella	Maternal Fecal Microbiome (Taxa)	1-2 months	stool_microbiome_maternal	0.00359158	0.00359158	-0.101592	-0.363659	0.160476	0.446059	Lower in SVN
milk_targeted_1421	Cer.d16.1.24.0.	milk_targeted_1421__Cer.d16.1.24.0.	Milk Targeted Metabolites	14-21 days	targeted_metabolites	-0.00358336	0.00358336	-0.143116	-0.404916	0.118684	0.282818	Lower in SVN
milk_taxa_1421	Phreatobacter.stygius	milk_taxa_1421__Phreatobacter.stygius	Milk Microbiome (Taxa)	14-21 days	milk_microbiome	-0.00357581	0.00357581	-0.0837038	-0.345859	0.178451	0.530183	Lower in SVN
milk_targeted_1421	TG.18.3_36.3.	milk_targeted_1421__TG.18.3_36.3.	Milk Targeted Metabolites	14-21 days	targeted_metabolites	0.00355927	0.00355927	0.0693962	-0.192816	0.331609	0.602804	Higher in SVN
infant_gene_12	K02863	infant_gene_12__K02863	Infant Fecal Metagenome (Genes)	1-2 months	stool_gene_infant	0.00352851	0.00352851	-0.0440869	-0.306375	0.218201	0.740991	Lower in SVN
maternal_prot_nav_12	P07357	maternal_prot_nav_12__P07357	Maternal Plasma Proteome (Naive)	1-2 months	prot_nav	0.00350322	0.00350322	-0.248597	-0.509307	0.0121124	0.0615556	Lower in SVN
infant_gene_12	K02950	infant_gene_12__K02950	Infant Fecal Metagenome (Genes)	1-2 months	stool_gene_infant	0.00349692	0.00349692	-0.0258437	-0.288165	0.236478	0.846371	Lower in SVN
maternal_taxa_12	CAG.312.sp002405555	maternal_taxa_12__CAG.312.sp002405555	Maternal Fecal Microbiome (Taxa)	1-2 months	stool_microbiome_maternal	0.00349078	0.00349078	-0.0639776	-0.326209	0.198254	0.631425	Lower in SVN
maternal_taxa_12	Unknown_Faecalibacterium.22	maternal_taxa_12__Unknown_Faecalibacterium.22	Maternal Fecal Microbiome (Taxa)	1-2 months	stool_microbiome_maternal	0.00345175	0.00345175	0.0814287	-0.180736	0.343593	0.541429	Higher in SVN
milk_metabolome_1421	rLC_neg_mtb_6052863	milk_metabolome_1421__rLC_neg_mtb_6052863	Milk Metabolome	14-21 days	milk_metabolome	-0.00342619	0.00342619	0.145516	-0.116266	0.407298	0.274808	Higher in SVN	589.393	448	negative
milk_taxa_1421	Calidifontimicrobium.sediminis	milk_taxa_1421__Calidifontimicrobium.sediminis	Milk Microbiome (Taxa)	14-21 days	milk_microbiome	-0.00338508	0.00338508	0.301938	0.0420058	0.56187	0.0229661	Higher in SVN
infant_gene_12	K03595	infant_gene_12__K03595	Infant Fecal Metagenome (Genes)	1-2 months	stool_gene_infant	-0.00337692	0.00337692	-0.0850986	-0.347247	0.17705	0.523347	Lower in SVN
maternal_prot_nav_12	P49908	maternal_prot_nav_12__P49908	Maternal Plasma Proteome (Naive)	1-2 months	prot_nav	-0.00333787	0.00333787	-0.0875534	-0.349691	0.174584	0.511426	Lower in SVN
maternal_taxa_12	Prevotella.sp900553155	maternal_taxa_12__Prevotella.sp900553155	Maternal Fecal Microbiome (Taxa)	1-2 months	stool_microbiome_maternal	0.00330933	0.00330933	0.193728	-0.067623	0.455079	0.145649	Higher in SVN
milk_macro_micro_1421	PL	milk_macro_micro_1421__PL	Milk Macro- and Micronutrients	14-21 days	macro_micronutrients	0.00328192	0.00328192	-0.149309	-0.411061	0.112444	0.262465	Lower in SVN
maternal_prot_nav_12	Q9Y6V0	maternal_prot_nav_12__Q9Y6V0	Maternal Plasma Proteome (Naive)	1-2 months	prot_nav	-0.00322643	0.00322643	-0.03698	-0.299283	0.225323	0.781589	Lower in SVN
milk_taxa_1421	Streptococcus.sp67	milk_taxa_1421__Streptococcus.sp67	Milk Microbiome (Taxa)	14-21 days	milk_microbiome	-0.00322201	0.00322201	0.211559	-0.0496017	0.472719	0.11193	Higher in SVN
infant_gene_12	K07042	infant_gene_12__K07042	Infant Fecal Metagenome (Genes)	1-2 months	stool_gene_infant	0.00320984	0.00320984	-0.0365126	-0.298817	0.225791	0.784281	Lower in SVN
maternal_gene_12	K06889	maternal_gene_12__K06889	Maternal Fecal Metagenome (Genes)	1-2 months	stool_gene_maternal	0.00320485	0.00320485	-0.176585	-0.438104	0.084933	0.184876	Lower in SVN
maternal_taxa_12	Unknown_Roseburia.7	maternal_taxa_12__Unknown_Roseburia.7	Maternal Fecal Microbiome (Taxa)	1-2 months	stool_microbiome_maternal	-0.00320356	0.00320356	0.233756	-0.0271428	0.494655	0.0788769	Higher in SVN
milk_targeted_1421	AA	milk_targeted_1421__AA	Milk Targeted Metabolites	14-21 days	targeted_metabolites	-0.0031852	0.0031852	0.344797	0.0856013	0.603993	0.00930994	Higher in SVN
infant_gene_12	K03601	infant_gene_12__K03601	Infant Fecal Metagenome (Genes)	1-2 months	stool_gene_infant	0.00317462	0.00317462	-0.0649089	-0.327137	0.197319	0.626465	Lower in SVN
maternal_prot_nav_12	A0A075B6S5	maternal_prot_nav_12__A0A075B6S5	Maternal Plasma Proteome (Naive)	1-2 months	prot_nav	0.0031742	0.0031742	-0.201009	-0.462284	0.0602662	0.131049	Lower in SVN
maternal_taxa_12	Unknown_UBA9475.3	maternal_taxa_12__Unknown_UBA9475.3	Maternal Fecal Microbiome (Taxa)	1-2 months	stool_microbiome_maternal	0.00315878	0.00315878	0.129612	-0.132285	0.391509	0.330808	Higher in SVN
milk_targeted_1421	FA.20.2.	milk_targeted_1421__FA.20.2.	Milk Targeted Metabolites	14-21 days	targeted_metabolites	-0.00314689	0.00314689	0.411547	0.153698	0.669397	0.00185859	Higher in SVN
milk_hmo_1421	FLNH_nmol/mL	milk_hmo_1421__FLNH_nmol/mL	Milk HMOs	14-21 days	hmos	0.00313718	0.00313718	-0.198581	-0.459882	0.0627193	0.135786	Lower in SVN
milk_taxa_1421	Rubellimicrobium.rubrum.1	milk_taxa_1421__Rubellimicrobium.rubrum.1	Milk Microbiome (Taxa)	14-21 days	milk_microbiome	0.003137	0.003137	-0.144151	-0.405943	0.117642	0.279345	Lower in SVN
maternal_prot_nav_12	Q9P1Y5	maternal_prot_nav_12__Q9P1Y5	Maternal Plasma Proteome (Naive)	1-2 months	prot_nav	0.00308243	0.00308243	-0.0107111	-0.273047	0.251625	0.936	Lower in SVN
maternal_prot_dep_12	P11021	maternal_prot_dep_12__P11021	Maternal Plasma Proteome (Depleted)	1-2 months	prot_dep	-0.00306484	0.00306484	0.138814	-0.123018	0.400647	0.297567	Higher in SVN
milk_taxa_1421	Corynebacterium.sp25	milk_taxa_1421__Corynebacterium.sp25	Milk Microbiome (Taxa)	14-21 days	milk_microbiome	-0.00304667	0.00304667	-0.119799	-0.38176	0.142163	0.368787	Lower in SVN
maternal_gene_12	K03973	maternal_gene_12__K03973	Maternal Fecal Metagenome (Genes)	1-2 months	stool_gene_maternal	0.00302066	0.00302066	-0.289817	-0.549939	-0.0296944	0.029116	Lower in SVN
milk_metabolome_1421	rLC_neg_mtb_884982	milk_metabolome_1421__rLC_neg_mtb_884982	Milk Metabolome	14-21 days	milk_metabolome	0.00298951	0.00298951	-0.0481979	-0.310476	0.21408	0.717823	Lower in SVN	259.048	79	negative
maternal_prot_dep_12	P15169	maternal_prot_dep_12__P15169	Maternal Plasma Proteome (Depleted)	1-2 months	prot_dep	-0.00291951	0.00291951	0.163525	-0.0981104	0.42516	0.219615	Higher in SVN
infant_gene_12	K00773	infant_gene_12__K00773	Infant Fecal Metagenome (Genes)	1-2 months	stool_gene_infant	0.00288304	0.00288304	-0.0708453	-0.333052	0.191362	0.59525	Lower in SVN
milk_taxa_1421	Sporosarcina.sp1	milk_taxa_1421__Sporosarcina.sp1	Milk Microbiome (Taxa)	14-21 days	milk_microbiome	-0.00287273	0.00287273	0.0369162	-0.225387	0.299219	0.781956	Higher in SVN
infant_gene_12	K03602	infant_gene_12__K03602	Infant Fecal Metagenome (Genes)	1-2 months	stool_gene_infant	0.00287084	0.00287084	-0.0507786	-0.31305	0.211493	0.703408	Lower in SVN
maternal_gene_12	K01270	maternal_gene_12__K01270	Maternal Fecal Metagenome (Genes)	1-2 months	stool_gene_maternal	0.00286948	0.00286948	-0.155782	-0.417482	0.105919	0.24229	Lower in SVN
milk_metabolome_1421	rLC_pos_mtb_3650742	milk_metabolome_1421__rLC_pos_mtb_3650742	Milk Metabolome	14-21 days	milk_metabolome	-0.00280125	0.00280125	0.256823	-0.00377708	0.517423	0.0533909	Higher in SVN	495.347	258	positive
milk_metabolome_1421	rLC_neg_mtb_4823199	milk_metabolome_1421__rLC_neg_mtb_4823199	Milk Metabolome	14-21 days	milk_metabolome	0.00279416	0.00279416	0.0311988	-0.231115	0.293512	0.815062	Higher in SVN	277.051	0.36	negative
milk_metabolome_1421	rLC_neg_mtb_6822852	milk_metabolome_1421__rLC_neg_mtb_6822852	Milk Metabolome	14-21 days	milk_metabolome	-0.00274959	0.00274959	0.156374	-0.105322	0.41807	0.2405	Higher in SVN	715.486	0.5	negative	E37	C15647	2-Acyl-1-(1-alkenyl)-sn-glycero-3-phosphate
milk_metabolome_1421	rLC_neg_mtb_6023447	milk_metabolome_1421__rLC_neg_mtb_6023447	Milk Metabolome	14-21 days	milk_metabolome	-0.00274407	0.00274407	0.206484	-0.0547323	0.4677	0.120834	Higher in SVN	659.404	446	negative
maternal_gene_12	K16964	maternal_gene_12__K16964	Maternal Fecal Metagenome (Genes)	1-2 months	stool_gene_maternal	0.00274365	0.00274365	-0.0123797	-0.274715	0.249955	0.926056	Lower in SVN
infant_gene_12	K03524	infant_gene_12__K03524	Infant Fecal Metagenome (Genes)	1-2 months	stool_gene_infant	0.00274174	0.00274174	0.050076	-0.212197	0.312349	0.707322	Higher in SVN
milk_targeted_1421	TG.18.3_32.0.	milk_targeted_1421__TG.18.3_32.0.	Milk Targeted Metabolites	14-21 days	targeted_metabolites	0.0027295	0.0027295	0.0788895	-0.183286	0.341065	0.554119	Higher in SVN
maternal_prot_dep_12	P05156	maternal_prot_dep_12__P05156	Maternal Plasma Proteome (Depleted)	1-2 months	prot_dep	0.00270608	0.00270608	-0.10571	-0.367755	0.156336	0.427823	Lower in SVN
maternal_prot_dep_12	Q96PD5	maternal_prot_dep_12__Q96PD5	Maternal Plasma Proteome (Depleted)	1-2 months	prot_dep	-0.00270159	0.00270159	0.0659119	-0.196313	0.328137	0.621142	Higher in SVN
infant_gene_12	K01956	infant_gene_12__K01956	Infant Fecal Metagenome (Genes)	1-2 months	stool_gene_infant	0.00267441	0.00267441	-0.0327405	-0.295051	0.22957	0.8061	Lower in SVN
infant_gene_12	K03977	infant_gene_12__K03977	Infant Fecal Metagenome (Genes)	1-2 months	stool_gene_infant	0.00261861	0.00261861	-0.0814914	-0.343656	0.180673	0.541117	Lower in SVN
milk_metabolome_1421	rLC_neg_mtb_6607086	milk_metabolome_1421__rLC_neg_mtb_6607086	Milk Metabolome	14-21 days	milk_metabolome	-0.00258477	0.00258477	0.220555	-0.0405021	0.481613	0.0974182	Higher in SVN	638.467	482	negative
infant_gene_12	K00762	infant_gene_12__K00762	Infant Fecal Metagenome (Genes)	1-2 months	stool_gene_infant	-0.00258087	0.00258087	0.00344442	-0.258894	0.265783	0.979399	Higher in SVN
infant_gene_12	K00927	infant_gene_12__K00927	Infant Fecal Metagenome (Genes)	1-2 months	stool_gene_infant	-0.0025591	0.0025591	-0.0454249	-0.30771	0.21686	0.733424	Lower in SVN
maternal_taxa_12	Unknown_CAG.170.8	maternal_taxa_12__Unknown_CAG.170.8	Maternal Fecal Microbiome (Taxa)	1-2 months	stool_microbiome_maternal	-0.00255787	0.00255787	-0.288953	-0.549088	-0.0288172	0.0296037	Lower in SVN
maternal_prot_dep_12	Q9Y2M2	maternal_prot_dep_12__Q9Y2M2	Maternal Plasma Proteome (Depleted)	1-2 months	prot_dep	0.00255445	0.00255445	0.11746	-0.144517	0.379436	0.378223	Higher in SVN
milk_targeted_1421	TG.18.1_35.3.	milk_targeted_1421__TG.18.1_35.3.	Milk Targeted Metabolites	14-21 days	targeted_metabolites	0.00253793	0.00253793	0.0506011	-0.211671	0.312873	0.704396	Higher in SVN
infant_gene_12	K02916	infant_gene_12__K02916	Infant Fecal Metagenome (Genes)	1-2 months	stool_gene_infant	-0.00253766	0.00253766	-0.065197	-0.327424	0.19703	0.624934	Lower in SVN
milk_targeted_1421	DG.18.1_20.3.	milk_targeted_1421__DG.18.1_20.3.	Milk Targeted Metabolites	14-21 days	targeted_metabolites	0.00251697	0.00251697	0.344745	0.0855485	0.603942	0.00932067	Higher in SVN
milk_taxa_1421	Arthrobacter_D.sp1	milk_taxa_1421__Arthrobacter_D.sp1	Milk Microbiome (Taxa)	14-21 days	milk_microbiome	-0.00250031	0.00250031	-0.143253	-0.405053	0.118546	0.282356	Lower in SVN
maternal_prot_nav_12	P36980	maternal_prot_nav_12__P36980	Maternal Plasma Proteome (Naive)	1-2 months	prot_nav	-0.00247907	0.00247907	-0.0562358	-0.318492	0.20602	0.673278	Lower in SVN
milk_bioactive_1421	FSH	milk_bioactive_1421__FSH	Milk Bioactive Proteins	14-21 days	bioactive_proteins	-0.00247337	0.00247337	-0.0931776	-0.355288	0.168933	0.484656	Lower in SVN
maternal_taxa_12	CAG.465.sp000433335	maternal_taxa_12__CAG.465.sp000433335	Maternal Fecal Microbiome (Taxa)	1-2 months	stool_microbiome_maternal	-0.00245645	0.00245645	-0.0416972	-0.303991	0.220596	0.754569	Lower in SVN
milk_metabolome_1421	rLC_neg_mtb_6758689	milk_metabolome_1421__rLC_neg_mtb_6758689	Milk Metabolome	14-21 days	milk_metabolome	-0.00245559	0.00245559	0.129484	-0.132414	0.391382	0.331286	Higher in SVN	590.423	496	negative
milk_targeted_1421	HexCer.d18.2.24.0.	milk_targeted_1421__HexCer.d18.2.24.0.	Milk Targeted Metabolites	14-21 days	targeted_metabolites	0.00245535	0.00245535	0.0215706	-0.240756	0.283897	0.871532	Higher in SVN
maternal_gene_12	K18583	maternal_gene_12__K18583	Maternal Fecal Metagenome (Genes)	1-2 months	stool_gene_maternal	0.00245451	0.00245451	-0.0969	-0.358992	0.165192	0.467362	Lower in SVN
infant_gene_12	K02945	infant_gene_12__K02945	Infant Fecal Metagenome (Genes)	1-2 months	stool_gene_infant	0.00234721	0.00234721	-0.0646256	-0.326855	0.197604	0.627972	Lower in SVN
maternal_taxa_12	CAG.272.sp000433515	maternal_taxa_12__CAG.272.sp000433515	Maternal Fecal Microbiome (Taxa)	1-2 months	stool_microbiome_maternal	-0.00232948	0.00232948	0.0779776	-0.184202	0.340157	0.558711	Higher in SVN
maternal_prot_dep_12	P29622	maternal_prot_dep_12__P29622	Maternal Plasma Proteome (Depleted)	1-2 months	prot_dep	0.00232724	0.00232724	-0.0151021	-0.277435	0.247231	0.909858	Lower in SVN
maternal_taxa_12	Acetatifactor.sp900066365	maternal_taxa_12__Acetatifactor.sp900066365	Maternal Fecal Microbiome (Taxa)	1-2 months	stool_microbiome_maternal	-0.00228133	0.00228133	0.138345	-0.12349	0.400181	0.299206	Higher in SVN
maternal_gene_12	K23518	maternal_gene_12__K23518	Maternal Fecal Metagenome (Genes)	1-2 months	stool_gene_maternal	0.00225374	0.00225374	-0.22758	-0.488554	0.0333946	0.087162	Lower in SVN
infant_gene_12	K00789	infant_gene_12__K00789	Infant Fecal Metagenome (Genes)	1-2 months	stool_gene_infant	0.0022225	0.0022225	-0.0696171	-0.331829	0.192595	0.60165	Lower in SVN
milk_hmo_1421	FDSLNH_nmol/mL	milk_hmo_1421__FDSLNH_nmol/mL	Milk HMOs	14-21 days	hmos	-0.00222104	0.00222104	-0.178068	-0.439573	0.083436	0.181202	Lower in SVN
infant_gene_12	K02956	infant_gene_12__K02956	Infant Fecal Metagenome (Genes)	1-2 months	stool_gene_infant	0.00221162	0.00221162	-0.0778827	-0.340062	0.184297	0.55919	Lower in SVN
maternal_prot_nav_12	P42680	maternal_prot_nav_12__P42680	Maternal Plasma Proteome (Naive)	1-2 months	prot_nav	-0.00220416	0.00220416	-0.0382018	-0.300503	0.224099	0.774564	Lower in SVN
maternal_gene_12	K01447	maternal_gene_12__K01447	Maternal Fecal Metagenome (Genes)	1-2 months	stool_gene_maternal	-0.00218699	0.00218699	-0.201155	-0.462428	0.0601185	0.130768	Lower in SVN
maternal_gene_12	K07133	maternal_gene_12__K07133	Maternal Fecal Metagenome (Genes)	1-2 months	stool_gene_maternal	0.00217507	0.00217507	0.0533409	-0.208923	0.315605	0.6892	Higher in SVN
maternal_taxa_12	Unknown_Lachnospiraceae.19	maternal_taxa_12__Unknown_Lachnospiraceae.19	Maternal Fecal Microbiome (Taxa)	1-2 months	stool_microbiome_maternal	-0.00217273	0.00217273	0.100851	-0.161221	0.362922	0.449387	Higher in SVN
maternal_gene_12	K10700	maternal_gene_12__K10700	Maternal Fecal Metagenome (Genes)	1-2 months	stool_gene_maternal	0.00216913	0.00216913	-0.0390644	-0.301363	0.223235	0.769615	Lower in SVN
infant_gene_12	K06207	infant_gene_12__K06207	Infant Fecal Metagenome (Genes)	1-2 months	stool_gene_infant	-0.00215497	0.00215497	-0.0282779	-0.290596	0.23404	0.832106	Lower in SVN
maternal_gene_12	K20741	maternal_gene_12__K20741	Maternal Fecal Metagenome (Genes)	1-2 months	stool_gene_maternal	0.00215215	0.00215215	0.185032	-0.0764054	0.44647	0.164672	Higher in SVN
maternal_gene_12	K00174	maternal_gene_12__K00174	Maternal Fecal Metagenome (Genes)	1-2 months	stool_gene_maternal	0.00215064	0.00215064	-0.264948	-0.525436	-0.00446072	0.0462294	Lower in SVN
milk_metabolome_1421	rLC_pos_mtb_4473639	milk_metabolome_1421__rLC_pos_mtb_4473639	Milk Metabolome	14-21 days	milk_metabolome	-0.00209955	0.00209955	0.150599	-0.111143	0.412342	0.258353	Higher in SVN	585.448	306	positive
milk_metabolome_1421	rLC_neg_mtb_6245250	milk_metabolome_1421__rLC_neg_mtb_6245250	Milk Metabolome	14-21 days	milk_metabolome	-0.00209575	0.00209575	0.122758	-0.139185	0.384701	0.35706	Higher in SVN	708.433	461	negative
infant_gene_12	K02115	infant_gene_12__K02115	Infant Fecal Metagenome (Genes)	1-2 months	stool_gene_infant	-0.00208659	0.00208659	-0.0628533	-0.325089	0.199382	0.637435	Lower in SVN
maternal_gene_12	K15954	maternal_gene_12__K15954	Maternal Fecal Metagenome (Genes)	1-2 months	stool_gene_maternal	0.0020825	0.0020825	-0.200858	-0.462135	0.0604185	0.131339	Lower in SVN
milk_taxa_1421	Unclassified.Burkholderiaceae_A_574934.sp2	milk_taxa_1421__Unclassified.Burkholderiaceae_A_574934.sp2	Milk Microbiome (Taxa)	14-21 days	milk_microbiome	-0.0020751	0.0020751	-0.072756	-0.334956	0.189444	0.585356	Lower in SVN
milk_targeted_1421	TG.16.0_36.3.	milk_targeted_1421__TG.16.0_36.3.	Milk Targeted Metabolites	14-21 days	targeted_metabolites	0.00206971	0.00206971	0.0391467	-0.223152	0.301446	0.769143	Higher in SVN
milk_targeted_1421	PC.aa.C34.4	milk_targeted_1421__PC.aa.C34.4	Milk Targeted Metabolites	14-21 days	targeted_metabolites	-0.00205426	0.00205426	0.0337464	-0.228563	0.296056	0.800266	Higher in SVN
maternal_prot_nav_12	P01871	maternal_prot_nav_12__P01871	Maternal Plasma Proteome (Naive)	1-2 months	prot_nav	-0.00204857	0.00204857	0.170241	-0.0913351	0.431818	0.201209	Higher in SVN
maternal_taxa_12	CAG.1193.sp000436255	maternal_taxa_12__CAG.1193.sp000436255	Maternal Fecal Microbiome (Taxa)	1-2 months	stool_microbiome_maternal	0.00204802	0.00204802	-0.0480482	-0.310327	0.21423	0.718662	Lower in SVN
maternal_prot_nav_12	Q8TF72	maternal_prot_nav_12__Q8TF72	Maternal Plasma Proteome (Naive)	1-2 months	prot_nav	0.0020299	0.0020299	0.288666	0.0285256	0.548805	0.0297674	Higher in SVN
maternal_gene_12	K15958	maternal_gene_12__K15958	Maternal Fecal Metagenome (Genes)	1-2 months	stool_gene_maternal	0.00202757	0.00202757	-0.190664	-0.452046	0.0707183	0.152152	Lower in SVN
milk_macro_micro_1421	B6	milk_macro_micro_1421__B6	Milk Macro- and Micronutrients	14-21 days	macro_micronutrients	0.00202433	0.00202433	-0.117303	-0.37928	0.144675	0.378862	Lower in SVN
milk_targeted_1421	TG.18.1_36.2.	milk_targeted_1421__TG.18.1_36.2.	Milk Targeted Metabolites	14-21 days	targeted_metabolites	0.00202366	0.00202366	-0.0680175	-0.330235	0.1942	0.610031	Lower in SVN
maternal_gene_12	K20568	maternal_gene_12__K20568	Maternal Fecal Metagenome (Genes)	1-2 months	stool_gene_maternal	0.00199399	0.00199399	-0.100961	-0.363033	0.16111	0.448888	Lower in SVN
infant_gene_12	K01883	infant_gene_12__K01883	Infant Fecal Metagenome (Genes)	1-2 months	stool_gene_infant	-0.00197703	0.00197703	-0.0444855	-0.306773	0.217802	0.738735	Lower in SVN
maternal_prot_dep_12	P49747	maternal_prot_dep_12__P49747	Maternal Plasma Proteome (Depleted)	1-2 months	prot_dep	-0.00195689	0.00195689	-0.153764	-0.415481	0.107953	0.248461	Lower in SVN
maternal_taxa_12	Unknown_SFJ001	maternal_taxa_12__Unknown_SFJ001	Maternal Fecal Microbiome (Taxa)	1-2 months	stool_microbiome_maternal	0.00195619	0.00195619	0.0717179	-0.190486	0.333922	0.590722	Higher in SVN
infant_gene_12	K01887	infant_gene_12__K01887	Infant Fecal Metagenome (Genes)	1-2 months	stool_gene_infant	0.00192387	0.00192387	-0.0431303	-0.305421	0.21916	0.746417	Lower in SVN
maternal_gene_12	K23674	maternal_gene_12__K23674	Maternal Fecal Metagenome (Genes)	1-2 months	stool_gene_maternal	0.00189327	0.00189327	-0.229917	-0.490863	0.0310295	0.0839488	Lower in SVN
milk_taxa_1421	Moraxella_A_651148.atlantae	milk_taxa_1421__Moraxella_A_651148.atlantae	Milk Microbiome (Taxa)	14-21 days	milk_microbiome	0.0018928	0.0018928	0.129927	-0.131968	0.391822	0.329633	Higher in SVN
maternal_taxa_12	UBA3631.sp900546275	maternal_taxa_12__UBA3631.sp900546275	Maternal Fecal Microbiome (Taxa)	1-2 months	stool_microbiome_maternal	-0.0018394	0.0018394	0.00670114	-0.255637	0.269039	0.959934	Higher in SVN
maternal_taxa_12	Unknown_CAG.83.8	maternal_taxa_12__Unknown_CAG.83.8	Maternal Fecal Microbiome (Taxa)	1-2 months	stool_microbiome_maternal	0.00182223	0.00182223	-0.10803	-0.370062	0.154002	0.41774	Lower in SVN
infant_gene_12	K04066	infant_gene_12__K04066	Infant Fecal Metagenome (Genes)	1-2 months	stool_gene_infant	0.00181828	0.00181828	-0.0412238	-0.303518	0.221071	0.757268	Lower in SVN
infant_gene_12	K14742	infant_gene_12__K14742	Infant Fecal Metagenome (Genes)	1-2 months	stool_gene_infant	-0.00181722	0.00181722	-0.0346779	-0.296985	0.22763	0.794874	Lower in SVN
maternal_gene_12	K10439	maternal_gene_12__K10439	Maternal Fecal Metagenome (Genes)	1-2 months	stool_gene_maternal	-0.0018058	0.0018058	-0.246545	-0.507281	0.014192	0.0637461	Lower in SVN
maternal_gene_12	K00929	maternal_gene_12__K00929	Maternal Fecal Metagenome (Genes)	1-2 months	stool_gene_maternal	0.00180376	0.00180376	-0.205019	-0.466251	0.0562135	0.123505	Lower in SVN
maternal_gene_12	K18570	maternal_gene_12__K18570	Maternal Fecal Metagenome (Genes)	1-2 months	stool_gene_maternal	0.0017913	0.0017913	-0.103389	-0.365447	0.158669	0.438044	Lower in SVN
milk_metabolome_1421	rLC_pos_mtb_2901280	milk_metabolome_1421__rLC_pos_mtb_2901280	Milk Metabolome	14-21 days	milk_metabolome	-0.00179004	0.00179004	0.0622909	-0.199946	0.324528	0.640449	Higher in SVN	218.139	209	positive	E172	pcrn	propionyl-carnitine
maternal_prot_nav_12	P22352	maternal_prot_nav_12__P22352	Maternal Plasma Proteome (Naive)	1-2 months	prot_nav	-0.00178749	0.00178749	-0.0956205	-0.357719	0.166478	0.473268	Lower in SVN
infant_gene_12	K01892	infant_gene_12__K01892	Infant Fecal Metagenome (Genes)	1-2 months	stool_gene_infant	0.00177139	0.00177139	-0.0655777	-0.327804	0.196648	0.622913	Lower in SVN
infant_gene_12	K03655	infant_gene_12__K03655	Infant Fecal Metagenome (Genes)	1-2 months	stool_gene_infant	0.00177084	0.00177084	-0.0275028	-0.289822	0.234816	0.836643	Lower in SVN
milk_hmo_1421	LNFP III_nmol/mL	milk_hmo_1421__LNFP III_nmol/mL	Milk HMOs	14-21 days	hmos	0.00176235	0.00176235	0.166092	-0.0955212	0.427705	0.212443	Higher in SVN
milk_metabolome_1421	rLC_neg_mtb_3649746	milk_metabolome_1421__rLC_neg_mtb_3649746	Milk Metabolome	14-21 days	milk_metabolome	-0.00175939	0.00175939	0.107658	-0.154377	0.369692	0.419348	Higher in SVN	617.074	267	negative
infant_gene_12	K02911	infant_gene_12__K02911	Infant Fecal Metagenome (Genes)	1-2 months	stool_gene_infant	-0.00175162	0.00175162	-0.0348845	-0.297192	0.227423	0.793679	Lower in SVN
milk_taxa_1421	Bifidobacterium.vaginale	milk_taxa_1421__Bifidobacterium.vaginale	Milk Microbiome (Taxa)	14-21 days	milk_microbiome	-0.00172483	0.00172483	-0.12273	-0.384673	0.139213	0.357171	Lower in SVN
maternal_prot_dep_12	P00488	maternal_prot_dep_12__P00488	Maternal Plasma Proteome (Depleted)	1-2 months	prot_dep	0.00171382	0.00171382	-0.0219254	-0.284252	0.240401	0.869437	Lower in SVN
maternal_prot_nav_12	Q96JM3	maternal_prot_nav_12__Q96JM3	Maternal Plasma Proteome (Naive)	1-2 months	prot_nav	0.00170306	0.00170306	-0.0331572	-0.295467	0.229153	0.803682	Lower in SVN
infant_gene_12	K02112	infant_gene_12__K02112	Infant Fecal Metagenome (Genes)	1-2 months	stool_gene_infant	0.00169648	0.00169648	-0.0745583	-0.336751	0.187635	0.576093	Lower in SVN
infant_gene_12	K05540	infant_gene_12__K05540	Infant Fecal Metagenome (Genes)	1-2 months	stool_gene_infant	-0.00168083	0.00168083	-0.0371199	-0.299423	0.225183	0.780784	Lower in SVN
milk_metabolome_1421	rLC_neg_mtb_2264868	milk_metabolome_1421__rLC_neg_mtb_2264868	Milk Metabolome	14-21 days	milk_metabolome	0.00167987	0.00167987	-0.159527	-0.421197	0.102142	0.231125	Lower in SVN	220.118	174	negative
maternal_prot_dep_12	P00918	maternal_prot_dep_12__P00918	Maternal Plasma Proteome (Depleted)	1-2 months	prot_dep	-0.00167793	0.00167793	0.212767	-0.0483798	0.473914	0.109888	Higher in SVN
infant_gene_12	K02867	infant_gene_12__K02867	Infant Fecal Metagenome (Genes)	1-2 months	stool_gene_infant	0.00166464	0.00166464	-0.0335138	-0.295823	0.228796	0.801614	Lower in SVN
maternal_gene_12	K01424	maternal_gene_12__K01424	Maternal Fecal Metagenome (Genes)	1-2 months	stool_gene_maternal	-0.00166021	0.00166021	-0.194965	-0.456303	0.0663732	0.143085	Lower in SVN
milk_targeted_1421	TG.14.0_32.2.	milk_targeted_1421__TG.14.0_32.2.	Milk Targeted Metabolites	14-21 days	targeted_metabolites	-0.0016579	0.0016579	0.00607097	-0.256267	0.268409	0.963699	Higher in SVN
infant_gene_12	K01870	infant_gene_12__K01870	Infant Fecal Metagenome (Genes)	1-2 months	stool_gene_infant	0.00165278	0.00165278	-0.0362555	-0.29856	0.226049	0.785763	Lower in SVN
milk_taxa_1421	Acinetobacter.sp30	milk_taxa_1421__Acinetobacter.sp30	Milk Microbiome (Taxa)	14-21 days	milk_microbiome	-0.00163592	0.00163592	-0.154401	-0.416113	0.107311	0.246499	Lower in SVN
maternal_prot_dep_12	P06396	maternal_prot_dep_12__P06396	Maternal Plasma Proteome (Depleted)	1-2 months	prot_dep	0.00161899	0.00161899	0.117691	-0.144283	0.379666	0.377281	Higher in SVN
maternal_taxa_12	SFFH01.sp900542395	maternal_taxa_12__SFFH01.sp900542395	Maternal Fecal Microbiome (Taxa)	1-2 months	stool_microbiome_maternal	-0.00160345	0.00160345	-0.306604	-0.56646	-0.0467467	0.0209176	Lower in SVN
infant_gene_12	K02902	infant_gene_12__K02902	Infant Fecal Metagenome (Genes)	1-2 months	stool_gene_infant	0.00160011	0.00160011	-0.0163039	-0.278636	0.246028	0.902719	Lower in SVN
maternal_prot_dep_12	Q9P0W8	maternal_prot_dep_12__Q9P0W8	Maternal Plasma Proteome (Depleted)	1-2 months	prot_dep	-0.00158067	0.00158067	0.0315601	-0.230753	0.293873	0.81296	Higher in SVN
maternal_taxa_12	UMGS1663.sp900553405	maternal_taxa_12__UMGS1663.sp900553405	Maternal Fecal Microbiome (Taxa)	1-2 months	stool_microbiome_maternal	-0.00157579	0.00157579	0.0733589	-0.188839	0.335557	0.582249	Higher in SVN
maternal_gene_12	K14732	maternal_gene_12__K14732	Maternal Fecal Metagenome (Genes)	1-2 months	stool_gene_maternal	-0.00157421	0.00157421	-0.221087	-0.482138	0.0399644	0.0966101	Lower in SVN
milk_macro_micro_1421	vitamin.A	milk_macro_micro_1421__vitamin.A	Milk Macro- and Micronutrients	14-21 days	macro_micronutrients	0.00156144	0.00156144	0.0479714	-0.214307	0.31025	0.719093	Higher in SVN
maternal_taxa_12	Unknown_UMGS1668	maternal_taxa_12__Unknown_UMGS1668	Maternal Fecal Microbiome (Taxa)	1-2 months	stool_microbiome_maternal	-0.00154132	0.00154132	-0.246117	-0.506859	0.0146253	0.0642105	Lower in SVN
infant_gene_12	K01929	infant_gene_12__K01929	Infant Fecal Metagenome (Genes)	1-2 months	stool_gene_infant	-0.00153418	0.00153418	-0.0460089	-0.308292	0.216275	0.730129	Lower in SVN
milk_taxa_1421	Acinetobacter.sp23	milk_taxa_1421__Acinetobacter.sp23	Milk Microbiome (Taxa)	14-21 days	milk_microbiome	0.00153327	0.00153327	-0.0836609	-0.345816	0.178494	0.530394	Lower in SVN
infant_gene_12	K00954	infant_gene_12__K00954	Infant Fecal Metagenome (Genes)	1-2 months	stool_gene_infant	-0.00153166	0.00153166	-0.0996739	-0.361752	0.162404	0.4547	Lower in SVN
milk_targeted_1421	TG.17.0_36.4.	milk_targeted_1421__TG.17.0_36.4.	Milk Targeted Metabolites	14-21 days	targeted_metabolites	0.00150877	0.00150877	0.0195043	-0.242825	0.281833	0.883746	Higher in SVN
milk_metabolome_1421	rLC_neg_mtb_4524154	milk_metabolome_1421__rLC_neg_mtb_4524154	Milk Metabolome	14-21 days	milk_metabolome	0.00149682	0.00149682	-0.0040514	-0.26639	0.258287	0.97577	Lower in SVN	193.031	318	negative
maternal_prot_dep_12	Q14839	maternal_prot_dep_12__Q14839	Maternal Plasma Proteome (Depleted)	1-2 months	prot_dep	0.00146667	0.00146667	0.275931	0.0156005	0.536261	0.0378437	Higher in SVN
milk_metabolome_1421	rLC_neg_mtb_4795678	milk_metabolome_1421__rLC_neg_mtb_4795678	Milk Metabolome	14-21 days	milk_metabolome	-0.00145868	0.00145868	0.105831	-0.156213	0.367876	0.42729	Higher in SVN	223.17	358	negative
maternal_gene_12	K03556	maternal_gene_12__K03556	Maternal Fecal Metagenome (Genes)	1-2 months	stool_gene_maternal	-0.00144897	0.00144897	-0.315223	-0.574937	-0.0555081	0.017547	Lower in SVN
maternal_prot_dep_12	P06727	maternal_prot_dep_12__P06727	Maternal Plasma Proteome (Depleted)	1-2 months	prot_dep	0.00144318	0.00144318	0.0327482	-0.229563	0.295059	0.806055	Higher in SVN
milk_taxa_1421	Exiguobacterium_A.sp2	milk_taxa_1421__Exiguobacterium_A.sp2	Milk Microbiome (Taxa)	14-21 days	milk_microbiome	0.00144106	0.00144106	-0.245996	-0.50674	0.0147482	0.0643427	Lower in SVN
infant_gene_12	K01783	infant_gene_12__K01783	Infant Fecal Metagenome (Genes)	1-2 months	stool_gene_infant	0.00143364	0.00143364	-0.0628263	-0.325062	0.199409	0.637579	Lower in SVN
maternal_taxa_12	UBA4372.sp900543815	maternal_taxa_12__UBA4372.sp900543815	Maternal Fecal Microbiome (Taxa)	1-2 months	stool_microbiome_maternal	0.00141758	0.00141758	-0.00236689	-0.264706	0.259972	0.985843	Lower in SVN
maternal_taxa_12	Unknown_RF32	maternal_taxa_12__Unknown_RF32	Maternal Fecal Microbiome (Taxa)	1-2 months	stool_microbiome_maternal	0.00141042	0.00141042	-0.196128	-0.457455	0.0651978	0.140705	Lower in SVN
milk_hmo_1421	Diversity	milk_hmo_1421__Diversity	Milk HMOs	14-21 days	hmos	-0.00140579	0.00140579	0.0674821	-0.194737	0.329702	0.612848	Higher in SVN
milk_hmo_1421	Evenness	milk_hmo_1421__Evenness	Milk HMOs	14-21 days	hmos	-0.00140579	0.00140579	0.0674821	-0.194737	0.329702	0.612848	Higher in SVN
milk_taxa_1421	Caldovatus.sp5	milk_taxa_1421__Caldovatus.sp5	Milk Microbiome (Taxa)	14-21 days	milk_microbiome	0.00138426	0.00138426	0.107709	-0.154325	0.369743	0.419127	Higher in SVN
maternal_taxa_12	CAG.83.sp900547745	maternal_taxa_12__CAG.83.sp900547745	Maternal Fecal Microbiome (Taxa)	1-2 months	stool_microbiome_maternal	-0.00137276	0.00137276	-0.166206	-0.427819	0.0954056	0.212127	Lower in SVN
maternal_gene_12	K16097	maternal_gene_12__K16097	Maternal Fecal Metagenome (Genes)	1-2 months	stool_gene_maternal	0.00137251	0.00137251	-0.131139	-0.393026	0.130748	0.325132	Lower in SVN
infant_gene_12	K11753	infant_gene_12__K11753	Infant Fecal Metagenome (Genes)	1-2 months	stool_gene_infant	0.00137235	0.00137235	-0.0131378	-0.275472	0.249197	0.921542	Lower in SVN
milk_macro_micro_1421	Ca	milk_macro_micro_1421__Ca	Milk Macro- and Micronutrients	14-21 days	macro_micronutrients	-0.0013609	0.0013609	-0.00232198	-0.264661	0.260017	0.986112	Lower in SVN
maternal_gene_12	K14418	maternal_gene_12__K14418	Maternal Fecal Metagenome (Genes)	1-2 months	stool_gene_maternal	0.00132703	0.00132703	-0.0983134	-0.360398	0.163772	0.460886	Lower in SVN
milk_metabolome_1421	rLC_neg_mtb_6029635	milk_metabolome_1421__rLC_neg_mtb_6029635	Milk Metabolome	14-21 days	milk_metabolome	-0.00131782	0.00131782	-0.0445271	-0.306814	0.21776	0.738499	Lower in SVN	1069.78	448	negative
maternal_prot_dep_12	P36980	maternal_prot_dep_12__P36980	Maternal Plasma Proteome (Depleted)	1-2 months	prot_dep	0.0013063	0.0013063	-8.63118e-05	-0.262425	0.262253	0.999484	Lower in SVN
milk_hmo_1421	LSTc_nmol/mL	milk_hmo_1421__LSTc_nmol/mL	Milk HMOs	14-21 days	hmos	0.00129805	0.00129805	0.0323895	-0.229922	0.294701	0.808138	Higher in SVN
maternal_taxa_12	CAG.448.sp000433415	maternal_taxa_12__CAG.448.sp000433415	Maternal Fecal Microbiome (Taxa)	1-2 months	stool_microbiome_maternal	-0.0012937	0.0012937	-0.118997	-0.380964	0.142969	0.372003	Lower in SVN
maternal_gene_12	K20585	maternal_gene_12__K20585	Maternal Fecal Metagenome (Genes)	1-2 months	stool_gene_maternal	0.00129335	0.00129335	-0.116236	-0.378219	0.145748	0.383219	Lower in SVN
maternal_prot_nav_12	P07360	maternal_prot_nav_12__P07360	Maternal Plasma Proteome (Naive)	1-2 months	prot_nav	0.00126873	0.00126873	-0.0560456	-0.318302	0.206211	0.67432	Lower in SVN
maternal_taxa_12	UBA737.sp002431945	maternal_taxa_12__UBA737.sp002431945	Maternal Fecal Microbiome (Taxa)	1-2 months	stool_microbiome_maternal	0.00126526	0.00126526	-0.174221	-0.435761	0.0873195	0.190845	Lower in SVN
infant_gene_12	K01142	infant_gene_12__K01142	Infant Fecal Metagenome (Genes)	1-2 months	stool_gene_infant	0.00125056	0.00125056	-0.0428931	-0.305184	0.219398	0.747764	Lower in SVN
maternal_prot_dep_12	Q16610	maternal_prot_dep_12__Q16610	Maternal Plasma Proteome (Depleted)	1-2 months	prot_dep	0.00121843	0.00121843	-0.13036	-0.392252	0.131532	0.328018	Lower in SVN
maternal_taxa_12	Unknown_UBA7057.2	maternal_taxa_12__Unknown_UBA7057.2	Maternal Fecal Microbiome (Taxa)	1-2 months	stool_microbiome_maternal	0.00121433	0.00121433	0.20855	-0.0526437	0.469743	0.117145	Higher in SVN
maternal_prot_dep_12	P02760	maternal_prot_dep_12__P02760	Maternal Plasma Proteome (Depleted)	1-2 months	prot_dep	-0.00121217	0.00121217	-0.25298	-0.513632	0.00767179	0.0570859	Lower in SVN
maternal_taxa_12	ER4.sp003522105	maternal_taxa_12__ER4.sp003522105	Maternal Fecal Microbiome (Taxa)	1-2 months	stool_microbiome_maternal	0.00120772	0.00120772	-0.377146	-0.63572	-0.118572	0.00440176	Lower in SVN
infant_gene_12	K03565	infant_gene_12__K03565	Infant Fecal Metagenome (Genes)	1-2 months	stool_gene_infant	-0.00120694	0.00120694	-0.0112105	-0.273546	0.251125	0.933022	Lower in SVN
milk_taxa_1421	Unclassified.Burkholderiaceae_A_592522.sp6	milk_taxa_1421__Unclassified.Burkholderiaceae_A_592522.sp6	Milk Microbiome (Taxa)	14-21 days	milk_microbiome	0.00120397	0.00120397	-0.000877618	-0.263217	0.261461	0.994751	Lower in SVN
infant_gene_12	K00858	infant_gene_12__K00858	Infant Fecal Metagenome (Genes)	1-2 months	stool_gene_infant	-0.00119527	0.00119527	-0.0841758	-0.346329	0.177977	0.527864	Lower in SVN
milk_targeted_1421	TG.17.0_34.1.	milk_targeted_1421__TG.17.0_34.1.	Milk Targeted Metabolites	14-21 days	targeted_metabolites	0.00119069	0.00119069	0.0525662	-0.2097	0.314833	0.693485	Higher in SVN
milk_bioactive_1421	LH	milk_bioactive_1421__LH	Milk Bioactive Proteins	14-21 days	bioactive_proteins	0.0011853	0.0011853	0.204916	-0.0563171	0.466149	0.123694	Higher in SVN
milk_taxa_1421	Acinetobacter.schindleri.1	milk_taxa_1421__Acinetobacter.schindleri.1	Milk Microbiome (Taxa)	14-21 days	milk_microbiome	-0.00117028	0.00117028	0.0669434	-0.195278	0.329165	0.615688	Higher in SVN
milk_macro_micro_1421	Se	milk_macro_micro_1421__Se	Milk Macro- and Micronutrients	14-21 days	macro_micronutrients	-0.00116963	0.00116963	-0.0382064	-0.300507	0.224094	0.774537	Lower in SVN
maternal_taxa_12	Unknown_UBA2883.1	maternal_taxa_12__Unknown_UBA2883.1	Maternal Fecal Microbiome (Taxa)	1-2 months	stool_microbiome_maternal	-0.00116142	0.00116142	-0.103043	-0.365103	0.159017	0.439582	Lower in SVN
infant_gene_12	K02884	infant_gene_12__K02884	Infant Fecal Metagenome (Genes)	1-2 months	stool_gene_infant	-0.00116069	0.00116069	-0.0500488	-0.312322	0.212224	0.707474	Lower in SVN
maternal_prot_nav_12	P14618	maternal_prot_nav_12__P14618	Maternal Plasma Proteome (Naive)	1-2 months	prot_nav	0.00115617	0.00115617	0.176866	-0.0846494	0.438382	0.184175	Higher in SVN
milk_taxa_1421	Methylobacterium.sp14	milk_taxa_1421__Methylobacterium.sp14	Milk Microbiome (Taxa)	14-21 days	milk_microbiome	0.00115564	0.00115564	0.0262867	-0.236034	0.288608	0.843771	Higher in SVN
maternal_gene_12	K23397	maternal_gene_12__K23397	Maternal Fecal Metagenome (Genes)	1-2 months	stool_gene_maternal	0.00115558	0.00115558	-0.1051	-0.367148	0.156949	0.430497	Lower in SVN
milk_targeted_1421	TG.18.1_36.4.	milk_targeted_1421__TG.18.1_36.4.	Milk Targeted Metabolites	14-21 days	targeted_metabolites	0.00114329	0.00114329	0.0155583	-0.246774	0.277891	0.907147	Higher in SVN
milk_metabolome_1421	rLC_neg_mtb_6387146	milk_metabolome_1421__rLC_neg_mtb_6387146	Milk Metabolome	14-21 days	milk_metabolome	-0.00112699	0.00112699	0.221254	-0.0397955	0.482303	0.0963574	Higher in SVN	562.392	469	negative
infant_gene_12	K02968	infant_gene_12__K02968	Infant Fecal Metagenome (Genes)	1-2 months	stool_gene_infant	0.00111189	0.00111189	-0.00744746	-0.269785	0.25489	0.955476	Lower in SVN
maternal_gene_12	K20597	maternal_gene_12__K20597	Maternal Fecal Metagenome (Genes)	1-2 months	stool_gene_maternal	0.0010932	0.0010932	-0.118238	-0.380209	0.143734	0.375068	Lower in SVN
milk_taxa_1421	F0422.sp001553345.9	milk_taxa_1421__F0422.sp001553345.9	Milk Microbiome (Taxa)	14-21 days	milk_microbiome	-0.00107663	0.00107663	0.0582353	-0.204015	0.320485	0.662365	Higher in SVN
infant_gene_12	K02899	infant_gene_12__K02899	Infant Fecal Metagenome (Genes)	1-2 months	stool_gene_infant	-0.0010557	0.0010557	-0.0966837	-0.358777	0.16541	0.468358	Lower in SVN
maternal_gene_12	K12632	maternal_gene_12__K12632	Maternal Fecal Metagenome (Genes)	1-2 months	stool_gene_maternal	0.00104034	0.00104034	-0.203204	-0.464455	0.0580479	0.126877	Lower in SVN
maternal_prot_nav_12	Q4KWH8	maternal_prot_nav_12__Q4KWH8	Maternal Plasma Proteome (Naive)	1-2 months	prot_nav	-0.00103554	0.00103554	-0.0837675	-0.345922	0.178387	0.52987	Lower in SVN
maternal_taxa_12	Unknown_CAG.245.4	maternal_taxa_12__Unknown_CAG.245.4	Maternal Fecal Microbiome (Taxa)	1-2 months	stool_microbiome_maternal	0.00102156	0.00102156	0.0402084	-0.222088	0.302505	0.763066	Higher in SVN
maternal_taxa_12	Unknown_UMGS1124.4	maternal_taxa_12__Unknown_UMGS1124.4	Maternal Fecal Microbiome (Taxa)	1-2 months	stool_microbiome_maternal	-0.00098414	0.00098414	0.101506	-0.160562	0.363574	0.446444	Higher in SVN
milk_taxa_1421	Ornithinimicrobium_390105.sp1	milk_taxa_1421__Ornithinimicrobium_390105.sp1	Milk Microbiome (Taxa)	14-21 days	milk_microbiome	0.00097725	0.00097725	-0.00989681	-0.272233	0.25244	0.940856	Lower in SVN
maternal_gene_12	K19629	maternal_gene_12__K19629	Maternal Fecal Metagenome (Genes)	1-2 months	stool_gene_maternal	0.000975094	0.000975094	-0.274658	-0.535007	-0.0143095	0.0387441	Lower in SVN
maternal_prot_dep_12	Q9NVR5	maternal_prot_dep_12__Q9NVR5	Maternal Plasma Proteome (Depleted)	1-2 months	prot_dep	0.000972293	0.000972293	0.0703937	-0.191815	0.332602	0.5976	Higher in SVN
infant_gene_12	K00942	infant_gene_12__K00942	Infant Fecal Metagenome (Genes)	1-2 months	stool_gene_infant	-0.000970846	0.000970846	-0.0548816	-0.317142	0.207378	0.680709	Lower in SVN
infant_gene_12	K01869	infant_gene_12__K01869	Infant Fecal Metagenome (Genes)	1-2 months	stool_gene_infant	-0.000955567	0.000955567	-0.0320499	-0.294362	0.230262	0.810111	Lower in SVN
milk_taxa_1421	Unclassified.Enterobacteriaceae_A.sp17	milk_taxa_1421__Unclassified.Enterobacteriaceae_A.sp17	Milk Microbiome (Taxa)	14-21 days	milk_microbiome	-0.000950843	0.000950843	-0.206532	-0.467748	0.0546835	0.120747	Lower in SVN
milk_taxa_1421	Sphingomonas_L_486704.sp24	milk_taxa_1421__Sphingomonas_L_486704.sp24	Milk Microbiome (Taxa)	14-21 days	milk_microbiome	-0.000950653	0.000950653	0.0716712	-0.190533	0.333875	0.590964	Higher in SVN
milk_targeted_1421	TG.18.3_36.2.	milk_targeted_1421__TG.18.3_36.2.	Milk Targeted Metabolites	14-21 days	targeted_metabolites	0.000946845	0.000946845	0.0158958	-0.246437	0.278228	0.905142	Higher in SVN
maternal_taxa_12	Desulfovibrio.piger	maternal_taxa_12__Desulfovibrio.piger	Maternal Fecal Microbiome (Taxa)	1-2 months	stool_microbiome_maternal	0.000944446	0.000944446	-0.0647863	-0.327015	0.197442	0.627116	Lower in SVN
infant_gene_12	K01586	infant_gene_12__K01586	Infant Fecal Metagenome (Genes)	1-2 months	stool_gene_infant	0.000936345	0.000936345	-0.0379374	-0.300239	0.224364	0.776082	Lower in SVN
maternal_gene_12	K21593	maternal_gene_12__K21593	Maternal Fecal Metagenome (Genes)	1-2 months	stool_gene_maternal	-0.000931768	0.000931768	-0.253684	-0.514326	0.00695855	0.0563938	Lower in SVN
infant_gene_12	K02992	infant_gene_12__K02992	Infant Fecal Metagenome (Genes)	1-2 months	stool_gene_infant	0.000931396	0.000931396	-0.0762537	-0.33844	0.185933	0.567443	Lower in SVN
infant_gene_12	K02860	infant_gene_12__K02860	Infant Fecal Metagenome (Genes)	1-2 months	stool_gene_infant	0.000920777	0.000920777	-0.00399464	-0.266333	0.258344	0.976109	Lower in SVN
maternal_gene_12	K16096	maternal_gene_12__K16096	Maternal Fecal Metagenome (Genes)	1-2 months	stool_gene_maternal	0.00091135	0.00091135	-0.146303	-0.408079	0.115473	0.272216	Lower in SVN
maternal_taxa_12	Unknown_CAG.533.3	maternal_taxa_12__Unknown_CAG.533.3	Maternal Fecal Microbiome (Taxa)	1-2 months	stool_microbiome_maternal	-0.000910124	0.000910124	-0.108209	-0.37024	0.153822	0.416968	Lower in SVN
milk_taxa_1421	Halopseudomonas.formosensis	milk_taxa_1421__Halopseudomonas.formosensis	Milk Microbiome (Taxa)	14-21 days	milk_microbiome	-0.000871069	0.000871069	-0.110798	-0.372815	0.151218	0.405895	Lower in SVN
maternal_taxa_12	Unknown_UBA10281.8	maternal_taxa_12__Unknown_UBA10281.8	Maternal Fecal Microbiome (Taxa)	1-2 months	stool_microbiome_maternal	0.000868246	0.000868246	-0.143939	-0.405733	0.117855	0.280054	Lower in SVN
infant_gene_12	K02959	infant_gene_12__K02959	Infant Fecal Metagenome (Genes)	1-2 months	stool_gene_infant	-0.00086274	0.00086274	-0.0619851	-0.324223	0.200253	0.642091	Lower in SVN
milk_taxa_1421	Desulfovibrio_R_446353.piger_A	milk_taxa_1421__Desulfovibrio_R_446353.piger_A	Milk Microbiome (Taxa)	14-21 days	milk_microbiome	-0.000857758	0.000857758	-0.115516	-0.377504	0.146472	0.386175	Lower in SVN
maternal_gene_12	K03574	maternal_gene_12__K03574	Maternal Fecal Metagenome (Genes)	1-2 months	stool_gene_maternal	0.000848592	0.000848592	-0.143972	-0.405766	0.117821	0.279942	Lower in SVN
infant_gene_12	K11991	infant_gene_12__K11991	Infant Fecal Metagenome (Genes)	1-2 months	stool_gene_infant	0.000841511	0.000841511	-0.0706331	-0.332841	0.191575	0.596354	Lower in SVN
milk_metabolome_1421	rLC_neg_mtb_5171559	milk_metabolome_1421__rLC_neg_mtb_5171559	Milk Metabolome	14-21 days	milk_metabolome	0.000830891	0.000830891	-0.238086	-0.498931	0.0227594	0.0734587	Lower in SVN	340.203	372	negative	E2291	C04805;C04742;C14749;C14748;C14778;C14770;C14771;C14769;C14768;CE5016	5-Hydroxyeicosatetraenoate$(15S)-15-Hydroxy-5,8,11-cis-13-trans-eicosatetraenoate; (15S)-15-Hydroxy-5,8,11-cis-13-trans-icosatetraenoate; (5Z,8Z,11Z,13E)-(15S)-15-Hydroxyicosa-5,8,11,13-tetraenoic acid; 15(S)-HETE$19(S)-HETE; (19S)-Hydroxyeicosatetraenoic acid; (19S)-Hydroxyicosatetraenoic acid; (19S)-Hydroxy arachidonic acid$20-Hydroxyeicosatetraenoic acid$16(R)-HETE; (5Z,8Z,11Z,14Z)-(16R)-16-Hy…
maternal_taxa_12	Unknown_Collinsella.6	maternal_taxa_12__Unknown_Collinsella.6	Maternal Fecal Microbiome (Taxa)	1-2 months	stool_microbiome_maternal	0.000813635	0.000813635	0.095831	-0.166267	0.357929	0.472294	Higher in SVN
infant_gene_12	K01933	infant_gene_12__K01933	Infant Fecal Metagenome (Genes)	1-2 months	stool_gene_infant	0.000808732	0.000808732	0.0128684	-0.249466	0.275203	0.923145	Higher in SVN
milk_targeted_1421	PC.aa.C40.3	milk_targeted_1421__PC.aa.C40.3	Milk Targeted Metabolites	14-21 days	targeted_metabolites	-0.000799554	0.000799554	0.133086	-0.128787	0.394959	0.317989	Higher in SVN
maternal_gene_12	K00567	maternal_gene_12__K00567	Maternal Fecal Metagenome (Genes)	1-2 months	stool_gene_maternal	-0.000791695	0.000791695	-0.224787	-0.485795	0.0362205	0.0911304	Lower in SVN
maternal_prot_nav_12	Q15428	maternal_prot_nav_12__Q15428	Maternal Plasma Proteome (Naive)	1-2 months	prot_nav	-0.000788959	0.000788959	-0.257276	-0.51787	0.00331762	0.0529684	Lower in SVN
maternal_gene_12	K15753	maternal_gene_12__K15753	Maternal Fecal Metagenome (Genes)	1-2 months	stool_gene_maternal	0.000776823	0.000776823	-0.230513	-0.491452	0.0304254	0.0831436	Lower in SVN
infant_gene_12	K01925	infant_gene_12__K01925	Infant Fecal Metagenome (Genes)	1-2 months	stool_gene_infant	0.000765795	0.000765795	-0.0293131	-0.29163	0.233003	0.826056	Lower in SVN
maternal_gene_12	K05394	maternal_gene_12__K05394	Maternal Fecal Metagenome (Genes)	1-2 months	stool_gene_maternal	-0.000758457	0.000758457	-0.255397	-0.516016	0.00522239	0.0547381	Lower in SVN
milk_taxa_1421	Mycobacterium.sp4	milk_taxa_1421__Mycobacterium.sp4	Milk Microbiome (Taxa)	14-21 days	milk_microbiome	0.00075837	0.00075837	-0.13853	-0.400364	0.123304	0.29856	Lower in SVN
maternal_gene_12	K12907	maternal_gene_12__K12907	Maternal Fecal Metagenome (Genes)	1-2 months	stool_gene_maternal	-0.000755575	0.000755575	-0.211277	-0.47244	0.0498862	0.11241	Lower in SVN
milk_taxa_1421	Bacillus_P_294101.sp7	milk_taxa_1421__Bacillus_P_294101.sp7	Milk Microbiome (Taxa)	14-21 days	milk_microbiome	0.000735908	0.000735908	0.138336	-0.1235	0.400171	0.29924	Higher in SVN
maternal_gene_12	K19652	maternal_gene_12__K19652	Maternal Fecal Metagenome (Genes)	1-2 months	stool_gene_maternal	0.000730117	0.000730117	-0.134681	-0.396543	0.127181	0.312213	Lower in SVN
infant_gene_12	K06187	infant_gene_12__K06187	Infant Fecal Metagenome (Genes)	1-2 months	stool_gene_infant	0.000715468	0.000715468	-0.044236	-0.306524	0.218052	0.740147	Lower in SVN
infant_gene_12	K07447	infant_gene_12__K07447	Infant Fecal Metagenome (Genes)	1-2 months	stool_gene_infant	-0.000713078	0.000713078	-0.0458361	-0.30812	0.216448	0.731103	Lower in SVN
maternal_gene_12	K17832	maternal_gene_12__K17832	Maternal Fecal Metagenome (Genes)	1-2 months	stool_gene_maternal	-0.000708875	0.000708875	-0.213328	-0.474468	0.0478128	0.10895	Lower in SVN
maternal_gene_12	K21320	maternal_gene_12__K21320	Maternal Fecal Metagenome (Genes)	1-2 months	stool_gene_maternal	-0.000707184	0.000707184	-0.199304	-0.460597	0.0619891	0.134362	Lower in SVN
maternal_gene_12	K05366	maternal_gene_12__K05366	Maternal Fecal Metagenome (Genes)	1-2 months	stool_gene_maternal	0.000696132	0.000696132	0.00252563	-0.259813	0.264865	0.984894	Higher in SVN
maternal_gene_12	K20548	maternal_gene_12__K20548	Maternal Fecal Metagenome (Genes)	1-2 months	stool_gene_maternal	-0.000691273	0.000691273	-0.202088	-0.463352	0.0591756	0.128985	Lower in SVN
maternal_taxa_12	CAG.841.sp900544285	maternal_taxa_12__CAG.841.sp900544285	Maternal Fecal Microbiome (Taxa)	1-2 months	stool_microbiome_maternal	0.000690178	0.000690178	0.00993338	-0.252403	0.27227	0.940638	Higher in SVN
maternal_taxa_12	Unknown_Gemmiger.2	maternal_taxa_12__Unknown_Gemmiger.2	Maternal Fecal Microbiome (Taxa)	1-2 months	stool_microbiome_maternal	-0.000677529	0.000677529	0.209971	-0.051207	0.471149	0.114659	Higher in SVN
infant_gene_12	K02528	infant_gene_12__K02528	Infant Fecal Metagenome (Genes)	1-2 months	stool_gene_infant	0.000675723	0.000675723	-0.0216323	-0.283959	0.240694	0.871167	Lower in SVN
infant_gene_12	K01876	infant_gene_12__K01876	Infant Fecal Metagenome (Genes)	1-2 months	stool_gene_infant	-0.000670093	0.000670093	-0.073175	-0.335373	0.189023	0.583196	Lower in SVN
infant_gene_12	K02518	infant_gene_12__K02518	Infant Fecal Metagenome (Genes)	1-2 months	stool_gene_infant	-0.000659871	0.000659871	-0.066051	-0.328275	0.196173	0.620405	Lower in SVN
maternal_gene_12	K03734	maternal_gene_12__K03734	Maternal Fecal Metagenome (Genes)	1-2 months	stool_gene_maternal	-0.000654369	0.000654369	-0.152384	-0.414112	0.109344	0.252741	Lower in SVN
milk_metabolome_1421	rLC_neg_mtb_5741404	milk_metabolome_1421__rLC_neg_mtb_5741404	Milk Metabolome	14-21 days	milk_metabolome	-0.000644382	0.000644382	0.132639	-0.129237	0.394516	0.319618	Higher in SVN	755.621	422	negative
maternal_gene_12	K00175	maternal_gene_12__K00175	Maternal Fecal Metagenome (Genes)	1-2 months	stool_gene_maternal	-0.000627658	0.000627658	-0.230944	-0.491877	0.0299901	0.0825673	Lower in SVN
milk_macro_micro_1421	B12	milk_macro_micro_1421__B12	Milk Macro- and Micronutrients	14-21 days	macro_micronutrients	0.000606904	0.000606904	-0.134378	-0.396242	0.127486	0.313305	Lower in SVN
infant_gene_12	K02888	infant_gene_12__K02888	Infant Fecal Metagenome (Genes)	1-2 months	stool_gene_infant	0.000606896	0.000606896	-0.0487785	-0.311055	0.213498	0.714571	Lower in SVN
maternal_prot_nav_12	P02671	maternal_prot_nav_12__P02671	Maternal Plasma Proteome (Naive)	1-2 months	prot_nav	-0.000599017	0.000599017	-0.152531	-0.414258	0.109196	0.252282	Lower in SVN
maternal_gene_12	GH13_0	maternal_gene_12__GH13_0	Maternal Fecal Metagenome (Genes)	1-2 months	stool_gene_maternal	0.000589644	0.000589644	-0.171277	-0.432844	0.0902895	0.198472	Lower in SVN
milk_metabolome_1421	rLC_pos_mtb_4710486	milk_metabolome_1421__rLC_pos_mtb_4710486	Milk Metabolome	14-21 days	milk_metabolome	0.000581526	0.000581526	0.246773	-0.0139604	0.507507	0.063499	Higher in SVN	583.513	316	positive
maternal_gene_12	K20171	maternal_gene_12__K20171	Maternal Fecal Metagenome (Genes)	1-2 months	stool_gene_maternal	-0.000551539	0.000551539	-0.222555	-0.483589	0.0384792	0.0944055	Lower in SVN
maternal_gene_12	K04651	maternal_gene_12__K04651	Maternal Fecal Metagenome (Genes)	1-2 months	stool_gene_maternal	0.000549263	0.000549263	-0.174567	-0.436104	0.0869701	0.189963	Lower in SVN
maternal_taxa_12	CAG.83.sp003539495	maternal_taxa_12__CAG.83.sp003539495	Maternal Fecal Microbiome (Taxa)	1-2 months	stool_microbiome_maternal	0.000532736	0.000532736	0.02594	-0.236381	0.288261	0.845806	Higher in SVN
maternal_gene_12	GH29_0	maternal_gene_12__GH29_0	Maternal Fecal Metagenome (Genes)	1-2 months	stool_gene_maternal	0.000523427	0.000523427	-0.175395	-0.436925	0.0861341	0.187863	Lower in SVN
maternal_gene_12	K01992	maternal_gene_12__K01992	Maternal Fecal Metagenome (Genes)	1-2 months	stool_gene_maternal	0.000507086	0.000507086	9.20996e-05	-0.262247	0.262431	0.999449	Higher in SVN
infant_gene_12	K01881	infant_gene_12__K01881	Infant Fecal Metagenome (Genes)	1-2 months	stool_gene_infant	0.00049133	0.00049133	-0.00765488	-0.269992	0.254683	0.954237	Lower in SVN
infant_taxa_12	Unknown_LC.2	infant_taxa_12__Unknown_LC.2	Infant Fecal Microbiome (Taxa)	1-2 months	stool_microbiome_infant	0.000491294	0.000491294	0.0366684	-0.225635	0.298972	0.783383	Higher in SVN
infant_taxa_12	Methanobrevibacter_A.smithii	infant_taxa_12__Methanobrevibacter_A.smithii	Infant Fecal Microbiome (Taxa)	1-2 months	stool_microbiome_infant	0.000491294	0.000491294	0.0366684	-0.225635	0.298972	0.783383	Higher in SVN
infant_taxa_12	Methanosphaera.stadtmanae	infant_taxa_12__Methanosphaera.stadtmanae	Infant Fecal Microbiome (Taxa)	1-2 months	stool_microbiome_infant	0.000491294	0.000491294	0.0366684	-0.225635	0.298972	0.783383	Higher in SVN
infant_taxa_12	MX.02.sp006954405	infant_taxa_12__MX.02.sp006954405	Infant Fecal Microbiome (Taxa)	1-2 months	stool_microbiome_infant	0.000491294	0.000491294	0.0366684	-0.225635	0.298972	0.783383	Higher in SVN
infant_taxa_12	Methanomethylophilus.alvus	infant_taxa_12__Methanomethylophilus.alvus	Infant Fecal Microbiome (Taxa)	1-2 months	stool_microbiome_infant	0.000491294	0.000491294	0.0366684	-0.225635	0.298972	0.783383	Higher in SVN
infant_taxa_12	Unknown_Arcanobacterium_A.1	infant_taxa_12__Unknown_Arcanobacterium_A.1	Infant Fecal Microbiome (Taxa)	1-2 months	stool_microbiome_infant	0.000491294	0.000491294	0.0366684	-0.225635	0.298972	0.783383	Higher in SVN
infant_taxa_12	Gleimia.europaea_A	infant_taxa_12__Gleimia.europaea_A	Infant Fecal Microbiome (Taxa)	1-2 months	stool_microbiome_infant	0.000491294	0.000491294	-0.080844	-0.343011	0.181323	0.544338	Lower in SVN
infant_taxa_12	Pauljensenia.sp001838165	infant_taxa_12__Pauljensenia.sp001838165	Infant Fecal Microbiome (Taxa)	1-2 months	stool_microbiome_infant	0.000491294	0.000491294	0.0366684	-0.225635	0.298972	0.783383	Higher in SVN
infant_taxa_12	Alloscardovia.omnicolens	infant_taxa_12__Alloscardovia.omnicolens	Infant Fecal Microbiome (Taxa)	1-2 months	stool_microbiome_infant	0.000491294	0.000491294	0.0366684	-0.225635	0.298972	0.783383	Higher in SVN
infant_taxa_12	Bifidobacterium.adolescentis	infant_taxa_12__Bifidobacterium.adolescentis	Infant Fecal Microbiome (Taxa)	1-2 months	stool_microbiome_infant	0.000491294	0.000491294	0.0366684	-0.225635	0.298972	0.783383	Higher in SVN
infant_taxa_12	Bifidobacterium.vaginale	infant_taxa_12__Bifidobacterium.vaginale	Infant Fecal Microbiome (Taxa)	1-2 months	stool_microbiome_infant	0.000491294	0.000491294	0.0366684	-0.225635	0.298972	0.783383	Higher in SVN
infant_taxa_12	Bifidobacterium.vaginale_G	infant_taxa_12__Bifidobacterium.vaginale_G	Infant Fecal Microbiome (Taxa)	1-2 months	stool_microbiome_infant	0.000491294	0.000491294	0.216785	-0.0443161	0.477886	0.103307	Higher in SVN
infant_taxa_12	Dermabacter.hominis	infant_taxa_12__Dermabacter.hominis	Infant Fecal Microbiome (Taxa)	1-2 months	stool_microbiome_infant	0.000491294	0.000491294	0.0366684	-0.225635	0.298972	0.783383	Higher in SVN
infant_taxa_12	Rothia.mucilaginosa_A	infant_taxa_12__Rothia.mucilaginosa_A	Infant Fecal Microbiome (Taxa)	1-2 months	stool_microbiome_infant	0.000491294	0.000491294	0.0366684	-0.225635	0.298972	0.783383	Higher in SVN
infant_taxa_12	Cutibacterium.avidum	infant_taxa_12__Cutibacterium.avidum	Infant Fecal Microbiome (Taxa)	1-2 months	stool_microbiome_infant	0.000491294	0.000491294	-0.0810762	-0.343243	0.18109	0.543182	Lower in SVN
infant_taxa_12	Olsenella_E.sp003150175	infant_taxa_12__Olsenella_E.sp003150175	Infant Fecal Microbiome (Taxa)	1-2 months	stool_microbiome_infant	0.000491294	0.000491294	0.0366684	-0.225635	0.298972	0.783383	Higher in SVN
infant_taxa_12	Olsenella_E.sp900540955	infant_taxa_12__Olsenella_E.sp900540955	Infant Fecal Microbiome (Taxa)	1-2 months	stool_microbiome_infant	0.000491294	0.000491294	0.0366684	-0.225635	0.298972	0.783383	Higher in SVN
infant_taxa_12	Unknown_Olsenella_E	infant_taxa_12__Unknown_Olsenella_E	Infant Fecal Microbiome (Taxa)	1-2 months	stool_microbiome_infant	0.000491294	0.000491294	0.0366684	-0.225635	0.298972	0.783383	Higher in SVN
infant_taxa_12	Unknown_Atopobiaceae	infant_taxa_12__Unknown_Atopobiaceae	Infant Fecal Microbiome (Taxa)	1-2 months	stool_microbiome_infant	0.000491294	0.000491294	0.0366684	-0.225635	0.298972	0.783383	Higher in SVN
infant_taxa_12	Collinsella.bouchesdurhonensis	infant_taxa_12__Collinsella.bouchesdurhonensis	Infant Fecal Microbiome (Taxa)	1-2 months	stool_microbiome_infant	0.000491294	0.000491294	0.0366684	-0.225635	0.298972	0.783383	Higher in SVN
infant_taxa_12	Unknown_Collinsella.2	infant_taxa_12__Unknown_Collinsella.2	Infant Fecal Microbiome (Taxa)	1-2 months	stool_microbiome_infant	0.000491294	0.000491294	0.0366684	-0.225635	0.298972	0.783383	Higher in SVN
infant_taxa_12	Unknown_Collinsella.3	infant_taxa_12__Unknown_Collinsella.3	Infant Fecal Microbiome (Taxa)	1-2 months	stool_microbiome_infant	0.000491294	0.000491294	0.217072	-0.044026	0.47817	0.102849	Higher in SVN
infant_taxa_12	Unknown_Collinsella.4	infant_taxa_12__Unknown_Collinsella.4	Infant Fecal Microbiome (Taxa)	1-2 months	stool_microbiome_infant	0.000491294	0.000491294	0.0366684	-0.225635	0.298972	0.783383	Higher in SVN
infant_taxa_12	Unknown_Collinsella.5	infant_taxa_12__Unknown_Collinsella.5	Infant Fecal Microbiome (Taxa)	1-2 months	stool_microbiome_infant	0.000491294	0.000491294	0.0366684	-0.225635	0.298972	0.783383	Higher in SVN
infant_taxa_12	Unknown_Collinsella.6	infant_taxa_12__Unknown_Collinsella.6	Infant Fecal Microbiome (Taxa)	1-2 months	stool_microbiome_infant	0.000491294	0.000491294	0.21651	-0.044594	0.477614	0.103746	Higher in SVN
infant_taxa_12	Enorma.sp900538305	infant_taxa_12__Enorma.sp900538305	Infant Fecal Microbiome (Taxa)	1-2 months	stool_microbiome_infant	0.000491294	0.000491294	0.0366684	-0.225635	0.298972	0.783383	Higher in SVN
infant_taxa_12	Unknown_Enorma	infant_taxa_12__Unknown_Enorma	Infant Fecal Microbiome (Taxa)	1-2 months	stool_microbiome_infant	0.000491294	0.000491294	0.0366684	-0.225635	0.298972	0.783383	Higher in SVN
infant_taxa_12	CAG.1427.sp000434775	infant_taxa_12__CAG.1427.sp000434775	Infant Fecal Microbiome (Taxa)	1-2 months	stool_microbiome_infant	0.000491294	0.000491294	0.0366684	-0.225635	0.298972	0.783383	Higher in SVN
infant_taxa_12	CAG.1427.sp000435675	infant_taxa_12__CAG.1427.sp000435675	Infant Fecal Microbiome (Taxa)	1-2 months	stool_microbiome_infant	0.000491294	0.000491294	0.0366684	-0.225635	0.298972	0.783383	Higher in SVN
infant_taxa_12	CAG.1427.sp000436075	infant_taxa_12__CAG.1427.sp000436075	Infant Fecal Microbiome (Taxa)	1-2 months	stool_microbiome_infant	0.000491294	0.000491294	0.0366684	-0.225635	0.298972	0.783383	Higher in SVN
infant_taxa_12	DNF00809.sp001552935	infant_taxa_12__DNF00809.sp001552935	Infant Fecal Microbiome (Taxa)	1-2 months	stool_microbiome_infant	0.000491294	0.000491294	0.0366684	-0.225635	0.298972	0.783383	Higher in SVN
infant_taxa_12	Gordonibacter.pamelaeae	infant_taxa_12__Gordonibacter.pamelaeae	Infant Fecal Microbiome (Taxa)	1-2 months	stool_microbiome_infant	0.000491294	0.000491294	0.217248	-0.0438482	0.478343	0.102569	Higher in SVN
infant_taxa_12	Gordonibacter.pamelaeae.1	infant_taxa_12__Gordonibacter.pamelaeae.1	Infant Fecal Microbiome (Taxa)	1-2 months	stool_microbiome_infant	0.000491294	0.000491294	0.217523	-0.0435692	0.478616	0.102132	Higher in SVN
infant_taxa_12	Phoenicibacter.congonensis	infant_taxa_12__Phoenicibacter.congonensis	Infant Fecal Microbiome (Taxa)	1-2 months	stool_microbiome_infant	0.000491294	0.000491294	0.0366684	-0.225635	0.298972	0.783383	Higher in SVN
infant_taxa_12	Senegalimassilia.sp004135645	infant_taxa_12__Senegalimassilia.sp004135645	Infant Fecal Microbiome (Taxa)	1-2 months	stool_microbiome_infant	0.000491294	0.000491294	0.0366684	-0.225635	0.298972	0.783383	Higher in SVN
infant_taxa_12	Unknown_Senegalimassilia.2	infant_taxa_12__Unknown_Senegalimassilia.2	Infant Fecal Microbiome (Taxa)	1-2 months	stool_microbiome_infant	0.000491294	0.000491294	0.0366684	-0.225635	0.298972	0.783383	Higher in SVN
infant_taxa_12	Unknown_Senegalimassilia.3	infant_taxa_12__Unknown_Senegalimassilia.3	Infant Fecal Microbiome (Taxa)	1-2 months	stool_microbiome_infant	0.000491294	0.000491294	0.0366684	-0.225635	0.298972	0.783383	Higher in SVN
infant_taxa_12	Slackia.exigua	infant_taxa_12__Slackia.exigua	Infant Fecal Microbiome (Taxa)	1-2 months	stool_microbiome_infant	0.000491294	0.000491294	0.0366684	-0.225635	0.298972	0.783383	Higher in SVN
infant_taxa_12	Unknown_Slackia_A	infant_taxa_12__Unknown_Slackia_A	Infant Fecal Microbiome (Taxa)	1-2 months	stool_microbiome_infant	0.000491294	0.000491294	-0.0806735	-0.342841	0.181495	0.545188	Lower in SVN
infant_taxa_12	Unknown_Slackia_A.1	infant_taxa_12__Unknown_Slackia_A.1	Infant Fecal Microbiome (Taxa)	1-2 months	stool_microbiome_infant	0.000491294	0.000491294	0.0366684	-0.225635	0.298972	0.783383	Higher in SVN
infant_taxa_12	Unknown_UMGS1293	infant_taxa_12__Unknown_UMGS1293	Infant Fecal Microbiome (Taxa)	1-2 months	stool_microbiome_infant	0.000491294	0.000491294	0.0366684	-0.225635	0.298972	0.783383	Higher in SVN
infant_taxa_12	Unknown_UMGS1502	infant_taxa_12__Unknown_UMGS1502	Infant Fecal Microbiome (Taxa)	1-2 months	stool_microbiome_infant	0.000491294	0.000491294	0.0366684	-0.225635	0.298972	0.783383	Higher in SVN
infant_taxa_12	Unknown_UMGS1502.1	infant_taxa_12__Unknown_UMGS1502.1	Infant Fecal Microbiome (Taxa)	1-2 months	stool_microbiome_infant	0.000491294	0.000491294	0.0366684	-0.225635	0.298972	0.783383	Higher in SVN
infant_taxa_12	UMGS1773.sp900554945	infant_taxa_12__UMGS1773.sp900554945	Infant Fecal Microbiome (Taxa)	1-2 months	stool_microbiome_infant	0.000491294	0.000491294	0.0366684	-0.225635	0.298972	0.783383	Higher in SVN
infant_taxa_12	Unknown_UMGS1773	infant_taxa_12__Unknown_UMGS1773	Infant Fecal Microbiome (Taxa)	1-2 months	stool_microbiome_infant	0.000491294	0.000491294	-0.0807908	-0.342958	0.181377	0.544603	Lower in SVN
infant_taxa_12	Unknown_W2P13.069	infant_taxa_12__Unknown_W2P13.069	Infant Fecal Microbiome (Taxa)	1-2 months	stool_microbiome_infant	0.000491294	0.000491294	0.0366684	-0.225635	0.298972	0.783383	Higher in SVN
infant_taxa_12	UMGS124.sp900539345	infant_taxa_12__UMGS124.sp900539345	Infant Fecal Microbiome (Taxa)	1-2 months	stool_microbiome_infant	0.000491294	0.000491294	0.0366684	-0.225635	0.298972	0.783383	Higher in SVN
infant_taxa_12	Unknown_UMGS124	infant_taxa_12__Unknown_UMGS124	Infant Fecal Microbiome (Taxa)	1-2 months	stool_microbiome_infant	0.000491294	0.000491294	0.0366684	-0.225635	0.298972	0.783383	Higher in SVN
infant_taxa_12	Bacteroides.cellulosilyticus	infant_taxa_12__Bacteroides.cellulosilyticus	Infant Fecal Microbiome (Taxa)	1-2 months	stool_microbiome_infant	0.000491294	0.000491294	0.0366684	-0.225635	0.298972	0.783383	Higher in SVN
infant_taxa_12	Bacteroides.clarus	infant_taxa_12__Bacteroides.clarus	Infant Fecal Microbiome (Taxa)	1-2 months	stool_microbiome_infant	0.000491294	0.000491294	0.0366684	-0.225635	0.298972	0.783383	Higher in SVN
infant_taxa_12	Bacteroides.intestinalis	infant_taxa_12__Bacteroides.intestinalis	Infant Fecal Microbiome (Taxa)	1-2 months	stool_microbiome_infant	0.000491294	0.000491294	0.0366684	-0.225635	0.298972	0.783383	Higher in SVN
infant_taxa_12	Bacteroides.nordii	infant_taxa_12__Bacteroides.nordii	Infant Fecal Microbiome (Taxa)	1-2 months	stool_microbiome_infant	0.000491294	0.000491294	0.0366684	-0.225635	0.298972	0.783383	Higher in SVN
infant_taxa_12	Bacteroides.salyersiae	infant_taxa_12__Bacteroides.salyersiae	Infant Fecal Microbiome (Taxa)	1-2 months	stool_microbiome_infant	0.000491294	0.000491294	0.0366684	-0.225635	0.298972	0.783383	Higher in SVN
infant_taxa_12	Bacteroides.stercoris	infant_taxa_12__Bacteroides.stercoris	Infant Fecal Microbiome (Taxa)	1-2 months	stool_microbiome_infant	0.000491294	0.000491294	0.0366684	-0.225635	0.298972	0.783383	Higher in SVN
infant_taxa_12	Unknown_Bacteroides	infant_taxa_12__Unknown_Bacteroides	Infant Fecal Microbiome (Taxa)	1-2 months	stool_microbiome_infant	0.000491294	0.000491294	0.0366684	-0.225635	0.298972	0.783383	Higher in SVN
infant_taxa_12	Unknown_OM05.12	infant_taxa_12__Unknown_OM05.12	Infant Fecal Microbiome (Taxa)	1-2 months	stool_microbiome_infant	0.000491294	0.000491294	0.0366684	-0.225635	0.298972	0.783383	Higher in SVN
infant_taxa_12	Paraprevotella.clara	infant_taxa_12__Paraprevotella.clara	Infant Fecal Microbiome (Taxa)	1-2 months	stool_microbiome_infant	0.000491294	0.000491294	0.0366684	-0.225635	0.298972	0.783383	Higher in SVN
infant_taxa_12	Unknown_Paraprevotella	infant_taxa_12__Unknown_Paraprevotella	Infant Fecal Microbiome (Taxa)	1-2 months	stool_microbiome_infant	0.000491294	0.000491294	0.0366684	-0.225635	0.298972	0.783383	Higher in SVN
infant_taxa_12	Phocaeicola.massiliensis	infant_taxa_12__Phocaeicola.massiliensis	Infant Fecal Microbiome (Taxa)	1-2 months	stool_microbiome_infant	0.000491294	0.000491294	0.0366684	-0.225635	0.298972	0.783383	Higher in SVN
infant_taxa_12	Phocaeicola.plebeius_A	infant_taxa_12__Phocaeicola.plebeius_A	Infant Fecal Microbiome (Taxa)	1-2 months	stool_microbiome_infant	0.000491294	0.000491294	0.0366684	-0.225635	0.298972	0.783383	Higher in SVN
infant_taxa_12	Prevotella.amnii	infant_taxa_12__Prevotella.amnii	Infant Fecal Microbiome (Taxa)	1-2 months	stool_microbiome_infant	0.000491294	0.000491294	0.0366684	-0.225635	0.298972	0.783383	Higher in SVN
infant_taxa_12	Prevotella.buccalis	infant_taxa_12__Prevotella.buccalis	Infant Fecal Microbiome (Taxa)	1-2 months	stool_microbiome_infant	0.000491294	0.000491294	0.0366684	-0.225635	0.298972	0.783383	Higher in SVN
infant_taxa_12	Prevotella.colorans	infant_taxa_12__Prevotella.colorans	Infant Fecal Microbiome (Taxa)	1-2 months	stool_microbiome_infant	0.000491294	0.000491294	0.216628	-0.0444748	0.477731	0.103558	Higher in SVN
infant_taxa_12	Prevotella.corporis	infant_taxa_12__Prevotella.corporis	Infant Fecal Microbiome (Taxa)	1-2 months	stool_microbiome_infant	0.000491294	0.000491294	0.216582	-0.0445216	0.477685	0.103632	Higher in SVN
infant_taxa_12	Prevotella.disiens	infant_taxa_12__Prevotella.disiens	Infant Fecal Microbiome (Taxa)	1-2 months	stool_microbiome_infant	0.000491294	0.000491294	0.0366684	-0.225635	0.298972	0.783383	Higher in SVN
infant_taxa_12	Prevotella.sp000834015	infant_taxa_12__Prevotella.sp000834015	Infant Fecal Microbiome (Taxa)	1-2 months	stool_microbiome_infant	0.000491294	0.000491294	0.0366684	-0.225635	0.298972	0.783383	Higher in SVN
infant_taxa_12	Prevotella.sp002251295	infant_taxa_12__Prevotella.sp002251295	Infant Fecal Microbiome (Taxa)	1-2 months	stool_microbiome_infant	0.000491294	0.000491294	0.0366684	-0.225635	0.298972	0.783383	Higher in SVN
infant_taxa_12	Prevotella.sp002251385	infant_taxa_12__Prevotella.sp002251385	Infant Fecal Microbiome (Taxa)	1-2 months	stool_microbiome_infant	0.000491294	0.000491294	0.0366684	-0.225635	0.298972	0.783383	Higher in SVN
infant_taxa_12	Prevotella.sp002300055	infant_taxa_12__Prevotella.sp002300055	Infant Fecal Microbiome (Taxa)	1-2 months	stool_microbiome_infant	0.000491294	0.000491294	0.0366684	-0.225635	0.298972	0.783383	Higher in SVN
infant_taxa_12	Prevotella.sp003447235	infant_taxa_12__Prevotella.sp003447235	Infant Fecal Microbiome (Taxa)	1-2 months	stool_microbiome_infant	0.000491294	0.000491294	0.0366684	-0.225635	0.298972	0.783383	Higher in SVN
infant_taxa_12	Prevotella.sp900543975	infant_taxa_12__Prevotella.sp900543975	Infant Fecal Microbiome (Taxa)	1-2 months	stool_microbiome_infant	0.000491294	0.000491294	0.0735835	-0.188613	0.33578	0.581094	Higher in SVN
infant_taxa_12	Prevotella.sp900546535	infant_taxa_12__Prevotella.sp900546535	Infant Fecal Microbiome (Taxa)	1-2 months	stool_microbiome_infant	0.000491294	0.000491294	-0.0810803	-0.343247	0.181086	0.543161	Lower in SVN
infant_taxa_12	Prevotella.sp900548535	infant_taxa_12__Prevotella.sp900548535	Infant Fecal Microbiome (Taxa)	1-2 months	stool_microbiome_infant	0.000491294	0.000491294	0.0366684	-0.225635	0.298972	0.783383	Higher in SVN
infant_taxa_12	Prevotella.sp900548585	infant_taxa_12__Prevotella.sp900548585	Infant Fecal Microbiome (Taxa)	1-2 months	stool_microbiome_infant	0.000491294	0.000491294	0.0366684	-0.225635	0.298972	0.783383	Higher in SVN
infant_taxa_12	Prevotella.sp900548745	infant_taxa_12__Prevotella.sp900548745	Infant Fecal Microbiome (Taxa)	1-2 months	stool_microbiome_infant	0.000491294	0.000491294	0.0366684	-0.225635	0.298972	0.783383	Higher in SVN
infant_taxa_12	Prevotella.sp900552965	infant_taxa_12__Prevotella.sp900552965	Infant Fecal Microbiome (Taxa)	1-2 months	stool_microbiome_infant	0.000491294	0.000491294	0.0366684	-0.225635	0.298972	0.783383	Higher in SVN
infant_taxa_12	Prevotella.sp900553155	infant_taxa_12__Prevotella.sp900553155	Infant Fecal Microbiome (Taxa)	1-2 months	stool_microbiome_infant	0.000491294	0.000491294	0.0366684	-0.225635	0.298972	0.783383	Higher in SVN
infant_taxa_12	Prevotella.sp900553595	infant_taxa_12__Prevotella.sp900553595	Infant Fecal Microbiome (Taxa)	1-2 months	stool_microbiome_infant	0.000491294	0.000491294	-0.0808761	-0.343043	0.181291	0.544178	Lower in SVN
infant_taxa_12	Prevotella.sp900556795	infant_taxa_12__Prevotella.sp900556795	Infant Fecal Microbiome (Taxa)	1-2 months	stool_microbiome_infant	0.000491294	0.000491294	-0.0811601	-0.343326	0.181006	0.542764	Lower in SVN
infant_taxa_12	Prevotella.sp900556825	infant_taxa_12__Prevotella.sp900556825	Infant Fecal Microbiome (Taxa)	1-2 months	stool_microbiome_infant	0.000491294	0.000491294	0.0366684	-0.225635	0.298972	0.783383	Higher in SVN
infant_taxa_12	Prevotella.timonensis	infant_taxa_12__Prevotella.timonensis	Infant Fecal Microbiome (Taxa)	1-2 months	stool_microbiome_infant	0.000491294	0.000491294	0.0366684	-0.225635	0.298972	0.783383	Higher in SVN
infant_taxa_12	Unknown_Prevotella	infant_taxa_12__Unknown_Prevotella	Infant Fecal Microbiome (Taxa)	1-2 months	stool_microbiome_infant	0.000491294	0.000491294	0.0366684	-0.225635	0.298972	0.783383	Higher in SVN
infant_taxa_12	Unknown_Prevotella.1	infant_taxa_12__Unknown_Prevotella.1	Infant Fecal Microbiome (Taxa)	1-2 months	stool_microbiome_infant	0.000491294	0.000491294	0.30802	0.0481861	0.567853	0.0203279	Higher in SVN
infant_taxa_12	Unknown_Prevotella.2	infant_taxa_12__Unknown_Prevotella.2	Infant Fecal Microbiome (Taxa)	1-2 months	stool_microbiome_infant	0.000491294	0.000491294	0.0366684	-0.225635	0.298972	0.783383	Higher in SVN
infant_taxa_12	Unknown_Prevotella.3	infant_taxa_12__Unknown_Prevotella.3	Infant Fecal Microbiome (Taxa)	1-2 months	stool_microbiome_infant	0.000491294	0.000491294	0.0366684	-0.225635	0.298972	0.783383	Higher in SVN
infant_taxa_12	Unknown_Prevotella.7	infant_taxa_12__Unknown_Prevotella.7	Infant Fecal Microbiome (Taxa)	1-2 months	stool_microbiome_infant	0.000491294	0.000491294	0.0366684	-0.225635	0.298972	0.783383	Higher in SVN
infant_taxa_12	Unknown_Prevotella.8	infant_taxa_12__Unknown_Prevotella.8	Infant Fecal Microbiome (Taxa)	1-2 months	stool_microbiome_infant	0.000491294	0.000491294	0.219542	-0.0415277	0.480611	0.0989747	Higher in SVN
infant_taxa_12	Unknown_Prevotella.9	infant_taxa_12__Unknown_Prevotella.9	Infant Fecal Microbiome (Taxa)	1-2 months	stool_microbiome_infant	0.000491294	0.000491294	0.0366684	-0.225635	0.298972	0.783383	Higher in SVN
infant_taxa_12	Unknown_Prevotella.11	infant_taxa_12__Unknown_Prevotella.11	Infant Fecal Microbiome (Taxa)	1-2 months	stool_microbiome_infant	0.000491294	0.000491294	0.0366684	-0.225635	0.298972	0.783383	Higher in SVN
infant_taxa_12	Unknown_Prevotella.12	infant_taxa_12__Unknown_Prevotella.12	Infant Fecal Microbiome (Taxa)	1-2 months	stool_microbiome_infant	0.000491294	0.000491294	0.0366684	-0.225635	0.298972	0.783383	Higher in SVN
infant_taxa_12	Prevotellamassilia.sp900541575	infant_taxa_12__Prevotellamassilia.sp900541575	Infant Fecal Microbiome (Taxa)	1-2 months	stool_microbiome_infant	0.000491294	0.000491294	0.0366684	-0.225635	0.298972	0.783383	Higher in SVN
infant_taxa_12	Prevotellamassilia.sp900542795	infant_taxa_12__Prevotellamassilia.sp900542795	Infant Fecal Microbiome (Taxa)	1-2 months	stool_microbiome_infant	0.000491294	0.000491294	0.0366684	-0.225635	0.298972	0.783383	Higher in SVN
infant_taxa_12	Prevotellamassilia.sp900543155	infant_taxa_12__Prevotellamassilia.sp900543155	Infant Fecal Microbiome (Taxa)	1-2 months	stool_microbiome_infant	0.000491294	0.000491294	0.0366684	-0.225635	0.298972	0.783383	Higher in SVN
infant_taxa_12	Prevotellamassilia.sp900546605	infant_taxa_12__Prevotellamassilia.sp900546605	Infant Fecal Microbiome (Taxa)	1-2 months	stool_microbiome_infant	0.000491294	0.000491294	0.0366684	-0.225635	0.298972	0.783383	Higher in SVN
infant_taxa_12	Prevotellamassilia.timonensis	infant_taxa_12__Prevotellamassilia.timonensis	Infant Fecal Microbiome (Taxa)	1-2 months	stool_microbiome_infant	0.000491294	0.000491294	0.0366684	-0.225635	0.298972	0.783383	Higher in SVN
infant_taxa_12	UBA4372.sp900543815	infant_taxa_12__UBA4372.sp900543815	Infant Fecal Microbiome (Taxa)	1-2 months	stool_microbiome_infant	0.000491294	0.000491294	0.0366684	-0.225635	0.298972	0.783383	Higher in SVN
infant_taxa_12	UBA6382.sp900557555	infant_taxa_12__UBA6382.sp900557555	Infant Fecal Microbiome (Taxa)	1-2 months	stool_microbiome_infant	0.000491294	0.000491294	0.0366684	-0.225635	0.298972	0.783383	Higher in SVN
infant_taxa_12	UBA6398.sp003150315	infant_taxa_12__UBA6398.sp003150315	Infant Fecal Microbiome (Taxa)	1-2 months	stool_microbiome_infant	0.000491294	0.000491294	0.0366684	-0.225635	0.298972	0.783383	Higher in SVN
infant_taxa_12	Barnesiella.intestinihominis	infant_taxa_12__Barnesiella.intestinihominis	Infant Fecal Microbiome (Taxa)	1-2 months	stool_microbiome_infant	0.000491294	0.000491294	0.0366684	-0.225635	0.298972	0.783383	Higher in SVN
infant_taxa_12	Barnesiella.sp900542255	infant_taxa_12__Barnesiella.sp900542255	Infant Fecal Microbiome (Taxa)	1-2 months	stool_microbiome_infant	0.000491294	0.000491294	0.0366684	-0.225635	0.298972	0.783383	Higher in SVN
infant_taxa_12	Dysgonomonas.mossii	infant_taxa_12__Dysgonomonas.mossii	Infant Fecal Microbiome (Taxa)	1-2 months	stool_microbiome_infant	0.000491294	0.000491294	-0.0810486	-0.343215	0.181118	0.543319	Lower in SVN
infant_taxa_12	Dysgonomonas.sp900079735	infant_taxa_12__Dysgonomonas.sp900079735	Infant Fecal Microbiome (Taxa)	1-2 months	stool_microbiome_infant	0.000491294	0.000491294	-0.0810741	-0.34324	0.181092	0.543192	Lower in SVN
infant_taxa_12	F082.sp002633315	infant_taxa_12__F082.sp002633315	Infant Fecal Microbiome (Taxa)	1-2 months	stool_microbiome_infant	0.000491294	0.000491294	0.0366684	-0.225635	0.298972	0.783383	Higher in SVN
infant_taxa_12	Butyricimonas.faecalis	infant_taxa_12__Butyricimonas.faecalis	Infant Fecal Microbiome (Taxa)	1-2 months	stool_microbiome_infant	0.000491294	0.000491294	0.0366684	-0.225635	0.298972	0.783383	Higher in SVN
infant_taxa_12	Butyricimonas.virosa	infant_taxa_12__Butyricimonas.virosa	Infant Fecal Microbiome (Taxa)	1-2 months	stool_microbiome_infant	0.000491294	0.000491294	0.0366684	-0.225635	0.298972	0.783383	Higher in SVN
infant_taxa_12	Odoribacter.sp900544025	infant_taxa_12__Odoribacter.sp900544025	Infant Fecal Microbiome (Taxa)	1-2 months	stool_microbiome_infant	0.000491294	0.000491294	0.0366684	-0.225635	0.298972	0.783383	Higher in SVN
infant_taxa_12	Odoribacter.splanchnicus	infant_taxa_12__Odoribacter.splanchnicus	Infant Fecal Microbiome (Taxa)	1-2 months	stool_microbiome_infant	0.000491294	0.000491294	0.0366684	-0.225635	0.298972	0.783383	Higher in SVN
infant_taxa_12	C941.sp004557565	infant_taxa_12__C941.sp004557565	Infant Fecal Microbiome (Taxa)	1-2 months	stool_microbiome_infant	0.000491294	0.000491294	0.0366684	-0.225635	0.298972	0.783383	Higher in SVN
infant_taxa_12	Unknown_C941	infant_taxa_12__Unknown_C941	Infant Fecal Microbiome (Taxa)	1-2 months	stool_microbiome_infant	0.000491294	0.000491294	0.0366684	-0.225635	0.298972	0.783383	Higher in SVN
infant_taxa_12	Unknown_C941.1	infant_taxa_12__Unknown_C941.1	Infant Fecal Microbiome (Taxa)	1-2 months	stool_microbiome_infant	0.000491294	0.000491294	0.0366684	-0.225635	0.298972	0.783383	Higher in SVN
infant_taxa_12	CAG.485.sp001701295	infant_taxa_12__CAG.485.sp001701295	Infant Fecal Microbiome (Taxa)	1-2 months	stool_microbiome_infant	0.000491294	0.000491294	0.0366684	-0.225635	0.298972	0.783383	Higher in SVN
infant_taxa_12	CAG.485.sp900550645	infant_taxa_12__CAG.485.sp900550645	Infant Fecal Microbiome (Taxa)	1-2 months	stool_microbiome_infant	0.000491294	0.000491294	0.0366684	-0.225635	0.298972	0.783383	Higher in SVN
infant_taxa_12	CAG.873.sp001701165	infant_taxa_12__CAG.873.sp001701165	Infant Fecal Microbiome (Taxa)	1-2 months	stool_microbiome_infant	0.000491294	0.000491294	0.0366684	-0.225635	0.298972	0.783383	Higher in SVN
infant_taxa_12	CAG.873.sp900540625	infant_taxa_12__CAG.873.sp900540625	Infant Fecal Microbiome (Taxa)	1-2 months	stool_microbiome_infant	0.000491294	0.000491294	0.0366684	-0.225635	0.298972	0.783383	Higher in SVN
infant_taxa_12	CAG.873.sp900555715	infant_taxa_12__CAG.873.sp900555715	Infant Fecal Microbiome (Taxa)	1-2 months	stool_microbiome_infant	0.000491294	0.000491294	0.0366684	-0.225635	0.298972	0.783383	Higher in SVN
infant_taxa_12	Unknown_Muribaculaceae	infant_taxa_12__Unknown_Muribaculaceae	Infant Fecal Microbiome (Taxa)	1-2 months	stool_microbiome_infant	0.000491294	0.000491294	0.0366684	-0.225635	0.298972	0.783383	Higher in SVN
infant_taxa_12	UBA3388.sp004551865	infant_taxa_12__UBA3388.sp004551865	Infant Fecal Microbiome (Taxa)	1-2 months	stool_microbiome_infant	0.000491294	0.000491294	0.0366684	-0.225635	0.298972	0.783383	Higher in SVN
infant_taxa_12	UBA3388.sp900545215	infant_taxa_12__UBA3388.sp900545215	Infant Fecal Microbiome (Taxa)	1-2 months	stool_microbiome_infant	0.000491294	0.000491294	0.0366684	-0.225635	0.298972	0.783383	Higher in SVN
infant_taxa_12	Unknown_RF16	infant_taxa_12__Unknown_RF16	Infant Fecal Microbiome (Taxa)	1-2 months	stool_microbiome_infant	0.000491294	0.000491294	0.0366684	-0.225635	0.298972	0.783383	Higher in SVN
infant_taxa_12	Unknown_RF16.1	infant_taxa_12__Unknown_RF16.1	Infant Fecal Microbiome (Taxa)	1-2 months	stool_microbiome_infant	0.000491294	0.000491294	0.0366684	-0.225635	0.298972	0.783383	Higher in SVN
infant_taxa_12	Porphyromonas.sp900538385	infant_taxa_12__Porphyromonas.sp900538385	Infant Fecal Microbiome (Taxa)	1-2 months	stool_microbiome_infant	0.000491294	0.000491294	0.0366684	-0.225635	0.298972	0.783383	Higher in SVN
infant_taxa_12	Porphyromonas.sp900539155	infant_taxa_12__Porphyromonas.sp900539155	Infant Fecal Microbiome (Taxa)	1-2 months	stool_microbiome_infant	0.000491294	0.000491294	0.0366684	-0.225635	0.298972	0.783383	Higher in SVN
infant_taxa_12	Porphyromonas.sp900548415	infant_taxa_12__Porphyromonas.sp900548415	Infant Fecal Microbiome (Taxa)	1-2 months	stool_microbiome_infant	0.000491294	0.000491294	0.0366684	-0.225635	0.298972	0.783383	Higher in SVN
infant_taxa_12	Porphyromonas.uenonis	infant_taxa_12__Porphyromonas.uenonis	Infant Fecal Microbiome (Taxa)	1-2 months	stool_microbiome_infant	0.000491294	0.000491294	0.0366684	-0.225635	0.298972	0.783383	Higher in SVN
infant_taxa_12	Porphyromonas.uenonis_A	infant_taxa_12__Porphyromonas.uenonis_A	Infant Fecal Microbiome (Taxa)	1-2 months	stool_microbiome_infant	0.000491294	0.000491294	0.0366684	-0.225635	0.298972	0.783383	Higher in SVN
infant_taxa_12	Unknown_Porphyromonas.3	infant_taxa_12__Unknown_Porphyromonas.3	Infant Fecal Microbiome (Taxa)	1-2 months	stool_microbiome_infant	0.000491294	0.000491294	0.0366684	-0.225635	0.298972	0.783383	Higher in SVN
infant_taxa_12	Porphyromonas_A.somerae	infant_taxa_12__Porphyromonas_A.somerae	Infant Fecal Microbiome (Taxa)	1-2 months	stool_microbiome_infant	0.000491294	0.000491294	0.0366684	-0.225635	0.298972	0.783383	Higher in SVN
infant_taxa_12	Porphyromonas_A.sp001808555	infant_taxa_12__Porphyromonas_A.sp001808555	Infant Fecal Microbiome (Taxa)	1-2 months	stool_microbiome_infant	0.000491294	0.000491294	0.0366684	-0.225635	0.298972	0.783383	Higher in SVN
infant_taxa_12	Alistipes.obesi	infant_taxa_12__Alistipes.obesi	Infant Fecal Microbiome (Taxa)	1-2 months	stool_microbiome_infant	0.000491294	0.000491294	0.0366684	-0.225635	0.298972	0.783383	Higher in SVN
infant_taxa_12	Alistipes.onderdonkii	infant_taxa_12__Alistipes.onderdonkii	Infant Fecal Microbiome (Taxa)	1-2 months	stool_microbiome_infant	0.000491294	0.000491294	0.0366684	-0.225635	0.298972	0.783383	Higher in SVN
infant_taxa_12	Alistipes.shahii	infant_taxa_12__Alistipes.shahii	Infant Fecal Microbiome (Taxa)	1-2 months	stool_microbiome_infant	0.000491294	0.000491294	0.0366684	-0.225635	0.298972	0.783383	Higher in SVN
infant_taxa_12	Alistipes.sp900083545	infant_taxa_12__Alistipes.sp900083545	Infant Fecal Microbiome (Taxa)	1-2 months	stool_microbiome_infant	0.000491294	0.000491294	0.0366684	-0.225635	0.298972	0.783383	Higher in SVN
infant_taxa_12	Alistipes.sp900541585	infant_taxa_12__Alistipes.sp900541585	Infant Fecal Microbiome (Taxa)	1-2 months	stool_microbiome_infant	0.000491294	0.000491294	0.0366684	-0.225635	0.298972	0.783383	Higher in SVN
infant_taxa_12	Alistipes.sp900546065	infant_taxa_12__Alistipes.sp900546065	Infant Fecal Microbiome (Taxa)	1-2 months	stool_microbiome_infant	0.000491294	0.000491294	0.0366684	-0.225635	0.298972	0.783383	Higher in SVN
infant_taxa_12	Alistipes.sp900549305	infant_taxa_12__Alistipes.sp900549305	Infant Fecal Microbiome (Taxa)	1-2 months	stool_microbiome_infant	0.000491294	0.000491294	0.0366684	-0.225635	0.298972	0.783383	Higher in SVN
infant_taxa_12	Tidjanibacter.inops	infant_taxa_12__Tidjanibacter.inops	Infant Fecal Microbiome (Taxa)	1-2 months	stool_microbiome_infant	0.000491294	0.000491294	0.0366684	-0.225635	0.298972	0.783383	Higher in SVN
infant_taxa_12	Unknown_Rikenellaceae	infant_taxa_12__Unknown_Rikenellaceae	Infant Fecal Microbiome (Taxa)	1-2 months	stool_microbiome_infant	0.000491294	0.000491294	0.0366684	-0.225635	0.298972	0.783383	Higher in SVN
infant_taxa_12	Unknown_Rikenellaceae.1	infant_taxa_12__Unknown_Rikenellaceae.1	Infant Fecal Microbiome (Taxa)	1-2 months	stool_microbiome_infant	0.000491294	0.000491294	0.0366684	-0.225635	0.298972	0.783383	Higher in SVN
infant_taxa_12	Parabacteroides.chinchillae	infant_taxa_12__Parabacteroides.chinchillae	Infant Fecal Microbiome (Taxa)	1-2 months	stool_microbiome_infant	0.000491294	0.000491294	0.0366684	-0.225635	0.298972	0.783383	Higher in SVN
infant_taxa_12	Parabacteroides.goldsteinii	infant_taxa_12__Parabacteroides.goldsteinii	Infant Fecal Microbiome (Taxa)	1-2 months	stool_microbiome_infant	0.000491294	0.000491294	0.217064	-0.0440343	0.478161	0.102862	Higher in SVN
infant_taxa_12	Parabacteroides.sp900155425	infant_taxa_12__Parabacteroides.sp900155425	Infant Fecal Microbiome (Taxa)	1-2 months	stool_microbiome_infant	0.000491294	0.000491294	0.307612	0.0477718	0.567452	0.0204961	Higher in SVN
infant_taxa_12	Parabacteroides.sp900541965	infant_taxa_12__Parabacteroides.sp900541965	Infant Fecal Microbiome (Taxa)	1-2 months	stool_microbiome_infant	0.000491294	0.000491294	-0.0812251	-0.343391	0.180941	0.542441	Lower in SVN
infant_taxa_12	Parabacteroides.sp900549585	infant_taxa_12__Parabacteroides.sp900549585	Infant Fecal Microbiome (Taxa)	1-2 months	stool_microbiome_infant	0.000491294	0.000491294	0.0366684	-0.225635	0.298972	0.783383	Higher in SVN
infant_taxa_12	Unknown_Parabacteroides	infant_taxa_12__Unknown_Parabacteroides	Infant Fecal Microbiome (Taxa)	1-2 months	stool_microbiome_infant	0.000491294	0.000491294	0.0366684	-0.225635	0.298972	0.783383	Higher in SVN
infant_taxa_12	Unknown_Parabacteroides.1	infant_taxa_12__Unknown_Parabacteroides.1	Infant Fecal Microbiome (Taxa)	1-2 months	stool_microbiome_infant	0.000491294	0.000491294	0.0366684	-0.225635	0.298972	0.783383	Higher in SVN
infant_taxa_12	RC9.sp000431015	infant_taxa_12__RC9.sp000431015	Infant Fecal Microbiome (Taxa)	1-2 months	stool_microbiome_infant	0.000491294	0.000491294	0.0366684	-0.225635	0.298972	0.783383	Higher in SVN
infant_taxa_12	RC9.sp000432515	infant_taxa_12__RC9.sp000432515	Infant Fecal Microbiome (Taxa)	1-2 months	stool_microbiome_infant	0.000491294	0.000491294	0.0366684	-0.225635	0.298972	0.783383	Higher in SVN
infant_taxa_12	RC9.sp000432655	infant_taxa_12__RC9.sp000432655	Infant Fecal Microbiome (Taxa)	1-2 months	stool_microbiome_infant	0.000491294	0.000491294	0.0366684	-0.225635	0.298972	0.783383	Higher in SVN
infant_taxa_12	RC9.sp000434935	infant_taxa_12__RC9.sp000434935	Infant Fecal Microbiome (Taxa)	1-2 months	stool_microbiome_infant	0.000491294	0.000491294	0.0366684	-0.225635	0.298972	0.783383	Higher in SVN
infant_taxa_12	RC9.sp000435075	infant_taxa_12__RC9.sp000435075	Infant Fecal Microbiome (Taxa)	1-2 months	stool_microbiome_infant	0.000491294	0.000491294	0.0366684	-0.225635	0.298972	0.783383	Higher in SVN
infant_taxa_12	RC9.sp900545245	infant_taxa_12__RC9.sp900545245	Infant Fecal Microbiome (Taxa)	1-2 months	stool_microbiome_infant	0.000491294	0.000491294	0.0366684	-0.225635	0.298972	0.783383	Higher in SVN
infant_taxa_12	RC9.sp900546445	infant_taxa_12__RC9.sp900546445	Infant Fecal Microbiome (Taxa)	1-2 months	stool_microbiome_infant	0.000491294	0.000491294	0.0366684	-0.225635	0.298972	0.783383	Higher in SVN
infant_taxa_12	RC9.sp900546925	infant_taxa_12__RC9.sp900546925	Infant Fecal Microbiome (Taxa)	1-2 months	stool_microbiome_infant	0.000491294	0.000491294	0.0366684	-0.225635	0.298972	0.783383	Higher in SVN
infant_taxa_12	Unknown_RC9	infant_taxa_12__Unknown_RC9	Infant Fecal Microbiome (Taxa)	1-2 months	stool_microbiome_infant	0.000491294	0.000491294	0.0366684	-0.225635	0.298972	0.783383	Higher in SVN
infant_taxa_12	Unknown_RC9.1	infant_taxa_12__Unknown_RC9.1	Infant Fecal Microbiome (Taxa)	1-2 months	stool_microbiome_infant	0.000491294	0.000491294	0.0366684	-0.225635	0.298972	0.783383	Higher in SVN
infant_taxa_12	UBA1820.sp003150615	infant_taxa_12__UBA1820.sp003150615	Infant Fecal Microbiome (Taxa)	1-2 months	stool_microbiome_infant	0.000491294	0.000491294	0.0366684	-0.225635	0.298972	0.783383	Higher in SVN
infant_taxa_12	Unknown_UBA1820	infant_taxa_12__Unknown_UBA1820	Infant Fecal Microbiome (Taxa)	1-2 months	stool_microbiome_infant	0.000491294	0.000491294	0.0366684	-0.225635	0.298972	0.783383	Higher in SVN
infant_taxa_12	Campylobacter_B.hominis	infant_taxa_12__Campylobacter_B.hominis	Infant Fecal Microbiome (Taxa)	1-2 months	stool_microbiome_infant	0.000491294	0.000491294	0.0366684	-0.225635	0.298972	0.783383	Higher in SVN
infant_taxa_12	Campylobacter_D.sp900539255	infant_taxa_12__Campylobacter_D.sp900539255	Infant Fecal Microbiome (Taxa)	1-2 months	stool_microbiome_infant	0.000491294	0.000491294	0.217146	-0.0439509	0.478243	0.102731	Higher in SVN
infant_taxa_12	Unknown_Campylobacter_D	infant_taxa_12__Unknown_Campylobacter_D	Infant Fecal Microbiome (Taxa)	1-2 months	stool_microbiome_infant	0.000491294	0.000491294	0.0366684	-0.225635	0.298972	0.783383	Higher in SVN
infant_taxa_12	Helicobacter_D.pullorum	infant_taxa_12__Helicobacter_D.pullorum	Infant Fecal Microbiome (Taxa)	1-2 months	stool_microbiome_infant	0.000491294	0.000491294	0.0366684	-0.225635	0.298972	0.783383	Higher in SVN
infant_taxa_12	Unknown_Helicobacteraceae	infant_taxa_12__Unknown_Helicobacteraceae	Infant Fecal Microbiome (Taxa)	1-2 months	stool_microbiome_infant	0.000491294	0.000491294	0.0366684	-0.225635	0.298972	0.783383	Higher in SVN
infant_taxa_12	CAG.196.sp002102975	infant_taxa_12__CAG.196.sp002102975	Infant Fecal Microbiome (Taxa)	1-2 months	stool_microbiome_infant	0.000491294	0.000491294	0.0366684	-0.225635	0.298972	0.783383	Higher in SVN
infant_taxa_12	CAG.196.sp900549855	infant_taxa_12__CAG.196.sp900549855	Infant Fecal Microbiome (Taxa)	1-2 months	stool_microbiome_infant	0.000491294	0.000491294	0.0366684	-0.225635	0.298972	0.783383	Higher in SVN
infant_taxa_12	CAG.196.sp900553895	infant_taxa_12__CAG.196.sp900553895	Infant Fecal Microbiome (Taxa)	1-2 months	stool_microbiome_infant	0.000491294	0.000491294	0.0366684	-0.225635	0.298972	0.783383	Higher in SVN
infant_taxa_12	Unknown_CAG.196.3	infant_taxa_12__Unknown_CAG.196.3	Infant Fecal Microbiome (Taxa)	1-2 months	stool_microbiome_infant	0.000491294	0.000491294	0.0366684	-0.225635	0.298972	0.783383	Higher in SVN
infant_taxa_12	Unknown_CAG.196.4	infant_taxa_12__Unknown_CAG.196.4	Infant Fecal Microbiome (Taxa)	1-2 months	stool_microbiome_infant	0.000491294	0.000491294	0.0366684	-0.225635	0.298972	0.783383	Higher in SVN
infant_taxa_12	Unknown_CAG.196.5	infant_taxa_12__Unknown_CAG.196.5	Infant Fecal Microbiome (Taxa)	1-2 months	stool_microbiome_infant	0.000491294	0.000491294	0.0366684	-0.225635	0.298972	0.783383	Higher in SVN
infant_taxa_12	Unknown_CAG.196.7	infant_taxa_12__Unknown_CAG.196.7	Infant Fecal Microbiome (Taxa)	1-2 months	stool_microbiome_infant	0.000491294	0.000491294	0.0366684	-0.225635	0.298972	0.783383	Higher in SVN
infant_taxa_12	Unknown_CAG.196.8	infant_taxa_12__Unknown_CAG.196.8	Infant Fecal Microbiome (Taxa)	1-2 months	stool_microbiome_infant	0.000491294	0.000491294	0.0366684	-0.225635	0.298972	0.783383	Higher in SVN
infant_taxa_12	Unknown_CAG.196.11	infant_taxa_12__Unknown_CAG.196.11	Infant Fecal Microbiome (Taxa)	1-2 months	stool_microbiome_infant	0.000491294	0.000491294	0.0366684	-0.225635	0.298972	0.783383	Higher in SVN
infant_taxa_12	Unknown_CAG.196.12	infant_taxa_12__Unknown_CAG.196.12	Infant Fecal Microbiome (Taxa)	1-2 months	stool_microbiome_infant	0.000491294	0.000491294	0.0366684	-0.225635	0.298972	0.783383	Higher in SVN
infant_taxa_12	CAG.306.sp000980375	infant_taxa_12__CAG.306.sp000980375	Infant Fecal Microbiome (Taxa)	1-2 months	stool_microbiome_infant	0.000491294	0.000491294	0.0366684	-0.225635	0.298972	0.783383	Higher in SVN
infant_taxa_12	CAG.484.sp900321895	infant_taxa_12__CAG.484.sp900321895	Infant Fecal Microbiome (Taxa)	1-2 months	stool_microbiome_infant	0.000491294	0.000491294	0.0366684	-0.225635	0.298972	0.783383	Higher in SVN
infant_taxa_12	QAMI01.sp003150395	infant_taxa_12__QAMI01.sp003150395	Infant Fecal Microbiome (Taxa)	1-2 months	stool_microbiome_infant	0.000491294	0.000491294	0.0366684	-0.225635	0.298972	0.783383	Higher in SVN
infant_taxa_12	Unknown_RUG841.1	infant_taxa_12__Unknown_RUG841.1	Infant Fecal Microbiome (Taxa)	1-2 months	stool_microbiome_infant	0.000491294	0.000491294	0.0366684	-0.225635	0.298972	0.783383	Higher in SVN
infant_taxa_12	Unknown_RUG841.2	infant_taxa_12__Unknown_RUG841.2	Infant Fecal Microbiome (Taxa)	1-2 months	stool_microbiome_infant	0.000491294	0.000491294	0.0366684	-0.225635	0.298972	0.783383	Higher in SVN
infant_taxa_12	UBA2883.sp002103075	infant_taxa_12__UBA2883.sp002103075	Infant Fecal Microbiome (Taxa)	1-2 months	stool_microbiome_infant	0.000491294	0.000491294	0.0366684	-0.225635	0.298972	0.783383	Higher in SVN
infant_taxa_12	Unknown_UBA2883.1	infant_taxa_12__Unknown_UBA2883.1	Infant Fecal Microbiome (Taxa)	1-2 months	stool_microbiome_infant	0.000491294	0.000491294	0.0366684	-0.225635	0.298972	0.783383	Higher in SVN
infant_taxa_12	Unknown_UBA2883.2	infant_taxa_12__Unknown_UBA2883.2	Infant Fecal Microbiome (Taxa)	1-2 months	stool_microbiome_infant	0.000491294	0.000491294	0.0366684	-0.225635	0.298972	0.783383	Higher in SVN
infant_taxa_12	Unknown_UBA6984	infant_taxa_12__Unknown_UBA6984	Infant Fecal Microbiome (Taxa)	1-2 months	stool_microbiome_infant	0.000491294	0.000491294	0.0366684	-0.225635	0.298972	0.783383	Higher in SVN
infant_taxa_12	Unknown_UBA6984.1	infant_taxa_12__Unknown_UBA6984.1	Infant Fecal Microbiome (Taxa)	1-2 months	stool_microbiome_infant	0.000491294	0.000491294	0.0366684	-0.225635	0.298972	0.783383	Higher in SVN
infant_taxa_12	Unknown_UBA791	infant_taxa_12__Unknown_UBA791	Infant Fecal Microbiome (Taxa)	1-2 months	stool_microbiome_infant	0.000491294	0.000491294	0.0366684	-0.225635	0.298972	0.783383	Higher in SVN
infant_taxa_12	Unknown_UBA791.1	infant_taxa_12__Unknown_UBA791.1	Infant Fecal Microbiome (Taxa)	1-2 months	stool_microbiome_infant	0.000491294	0.000491294	0.0366684	-0.225635	0.298972	0.783383	Higher in SVN
infant_taxa_12	UMGS1477.sp900552205	infant_taxa_12__UMGS1477.sp900552205	Infant Fecal Microbiome (Taxa)	1-2 months	stool_microbiome_infant	0.000491294	0.000491294	0.0366684	-0.225635	0.298972	0.783383	Higher in SVN
infant_taxa_12	Unknown_UMGS1585	infant_taxa_12__Unknown_UMGS1585	Infant Fecal Microbiome (Taxa)	1-2 months	stool_microbiome_infant	0.000491294	0.000491294	0.0366684	-0.225635	0.298972	0.783383	Higher in SVN
infant_taxa_12	Unknown_Gastranaerophilaceae	infant_taxa_12__Unknown_Gastranaerophilaceae	Infant Fecal Microbiome (Taxa)	1-2 months	stool_microbiome_infant	0.000491294	0.000491294	0.0366684	-0.225635	0.298972	0.783383	Higher in SVN
infant_taxa_12	Unknown_Gastranaerophilaceae.1	infant_taxa_12__Unknown_Gastranaerophilaceae.1	Infant Fecal Microbiome (Taxa)	1-2 months	stool_microbiome_infant	0.000491294	0.000491294	0.0366684	-0.225635	0.298972	0.783383	Higher in SVN
infant_taxa_12	Unknown_Gastranaerophilaceae.3	infant_taxa_12__Unknown_Gastranaerophilaceae.3	Infant Fecal Microbiome (Taxa)	1-2 months	stool_microbiome_infant	0.000491294	0.000491294	0.0366684	-0.225635	0.298972	0.783383	Higher in SVN
infant_taxa_12	Unknown_Gastranaerophilaceae.4	infant_taxa_12__Unknown_Gastranaerophilaceae.4	Infant Fecal Microbiome (Taxa)	1-2 months	stool_microbiome_infant	0.000491294	0.000491294	0.0366684	-0.225635	0.298972	0.783383	Higher in SVN
infant_taxa_12	Unknown_Zag1.2	infant_taxa_12__Unknown_Zag1.2	Infant Fecal Microbiome (Taxa)	1-2 months	stool_microbiome_infant	0.000491294	0.000491294	0.0366684	-0.225635	0.298972	0.783383	Higher in SVN
infant_taxa_12	Unknown_Zag1.3	infant_taxa_12__Unknown_Zag1.3	Infant Fecal Microbiome (Taxa)	1-2 months	stool_microbiome_infant	0.000491294	0.000491294	0.0366684	-0.225635	0.298972	0.783383	Higher in SVN
infant_taxa_12	Unknown_Zag1.4	infant_taxa_12__Unknown_Zag1.4	Infant Fecal Microbiome (Taxa)	1-2 months	stool_microbiome_infant	0.000491294	0.000491294	0.0366684	-0.225635	0.298972	0.783383	Higher in SVN
infant_taxa_12	Unknown_Zag1.5	infant_taxa_12__Unknown_Zag1.5	Infant Fecal Microbiome (Taxa)	1-2 months	stool_microbiome_infant	0.000491294	0.000491294	0.0366684	-0.225635	0.298972	0.783383	Higher in SVN
infant_taxa_12	Unknown_Zag1.6	infant_taxa_12__Unknown_Zag1.6	Infant Fecal Microbiome (Taxa)	1-2 months	stool_microbiome_infant	0.000491294	0.000491294	0.0366684	-0.225635	0.298972	0.783383	Higher in SVN
infant_taxa_12	Zag1.sp001765415	infant_taxa_12__Zag1.sp001765415	Infant Fecal Microbiome (Taxa)	1-2 months	stool_microbiome_infant	0.000491294	0.000491294	0.0366684	-0.225635	0.298972	0.783383	Higher in SVN
infant_taxa_12	Zag1.sp900556295	infant_taxa_12__Zag1.sp900556295	Infant Fecal Microbiome (Taxa)	1-2 months	stool_microbiome_infant	0.000491294	0.000491294	0.0366684	-0.225635	0.298972	0.783383	Higher in SVN
infant_taxa_12	Unknown_Zag111	infant_taxa_12__Unknown_Zag111	Infant Fecal Microbiome (Taxa)	1-2 months	stool_microbiome_infant	0.000491294	0.000491294	0.0366684	-0.225635	0.298972	0.783383	Higher in SVN
infant_taxa_12	Unknown_Zag111.2	infant_taxa_12__Unknown_Zag111.2	Infant Fecal Microbiome (Taxa)	1-2 months	stool_microbiome_infant	0.000491294	0.000491294	0.0366684	-0.225635	0.298972	0.783383	Higher in SVN
infant_taxa_12	Zag111.sp002102825	infant_taxa_12__Zag111.sp002102825	Infant Fecal Microbiome (Taxa)	1-2 months	stool_microbiome_infant	0.000491294	0.000491294	0.0366684	-0.225635	0.298972	0.783383	Higher in SVN
infant_taxa_12	Zag111.sp004558955	infant_taxa_12__Zag111.sp004558955	Infant Fecal Microbiome (Taxa)	1-2 months	stool_microbiome_infant	0.000491294	0.000491294	0.0366684	-0.225635	0.298972	0.783383	Higher in SVN
infant_taxa_12	Unknown_Gastranaerophilales	infant_taxa_12__Unknown_Gastranaerophilales	Infant Fecal Microbiome (Taxa)	1-2 months	stool_microbiome_infant	0.000491294	0.000491294	0.0366684	-0.225635	0.298972	0.783383	Higher in SVN
infant_taxa_12	Unknown_Gastranaerophilales.1	infant_taxa_12__Unknown_Gastranaerophilales.1	Infant Fecal Microbiome (Taxa)	1-2 months	stool_microbiome_infant	0.000491294	0.000491294	0.0366684	-0.225635	0.298972	0.783383	Higher in SVN
infant_taxa_12	Unknown_Gastranaerophilales.2	infant_taxa_12__Unknown_Gastranaerophilales.2	Infant Fecal Microbiome (Taxa)	1-2 months	stool_microbiome_infant	0.000491294	0.000491294	0.0366684	-0.225635	0.298972	0.783383	Higher in SVN
infant_taxa_12	Bilophila.sp900553145	infant_taxa_12__Bilophila.sp900553145	Infant Fecal Microbiome (Taxa)	1-2 months	stool_microbiome_infant	0.000491294	0.000491294	0.0366684	-0.225635	0.298972	0.783383	Higher in SVN
infant_taxa_12	Desulfovibrio.sp900319575	infant_taxa_12__Desulfovibrio.sp900319575	Infant Fecal Microbiome (Taxa)	1-2 months	stool_microbiome_infant	0.000491294	0.000491294	0.0366684	-0.225635	0.298972	0.783383	Higher in SVN
infant_taxa_12	Desulfovibrio.sp900540515	infant_taxa_12__Desulfovibrio.sp900540515	Infant Fecal Microbiome (Taxa)	1-2 months	stool_microbiome_infant	0.000491294	0.000491294	0.0366684	-0.225635	0.298972	0.783383	Higher in SVN
infant_taxa_12	Unknown_Desulfovibrio	infant_taxa_12__Unknown_Desulfovibrio	Infant Fecal Microbiome (Taxa)	1-2 months	stool_microbiome_infant	0.000491294	0.000491294	0.0366684	-0.225635	0.298972	0.783383	Higher in SVN
infant_taxa_12	Mailhella.sp003150275	infant_taxa_12__Mailhella.sp003150275	Infant Fecal Microbiome (Taxa)	1-2 months	stool_microbiome_infant	0.000491294	0.000491294	0.0366684	-0.225635	0.298972	0.783383	Higher in SVN
infant_taxa_12	UBA1174.sp900556855	infant_taxa_12__UBA1174.sp900556855	Infant Fecal Microbiome (Taxa)	1-2 months	stool_microbiome_infant	0.000491294	0.000491294	0.0366684	-0.225635	0.298972	0.783383	Higher in SVN
infant_taxa_12	UBA1436.sp900541355	infant_taxa_12__UBA1436.sp900541355	Infant Fecal Microbiome (Taxa)	1-2 months	stool_microbiome_infant	0.000491294	0.000491294	0.0366684	-0.225635	0.298972	0.783383	Higher in SVN
infant_taxa_12	Unknown_UBA1436	infant_taxa_12__Unknown_UBA1436	Infant Fecal Microbiome (Taxa)	1-2 months	stool_microbiome_infant	0.000491294	0.000491294	0.0366684	-0.225635	0.298972	0.783383	Higher in SVN
infant_taxa_12	Unknown_UBA1436.1	infant_taxa_12__Unknown_UBA1436.1	Infant Fecal Microbiome (Taxa)	1-2 months	stool_microbiome_infant	0.000491294	0.000491294	0.0366684	-0.225635	0.298972	0.783383	Higher in SVN
infant_taxa_12	Unknown_UBA1436.2	infant_taxa_12__Unknown_UBA1436.2	Infant Fecal Microbiome (Taxa)	1-2 months	stool_microbiome_infant	0.000491294	0.000491294	0.0366684	-0.225635	0.298972	0.783383	Higher in SVN
infant_taxa_12	Unknown_Elusimicrobiaceae	infant_taxa_12__Unknown_Elusimicrobiaceae	Infant Fecal Microbiome (Taxa)	1-2 months	stool_microbiome_infant	0.000491294	0.000491294	0.0366684	-0.225635	0.298972	0.783383	Higher in SVN
infant_taxa_12	Unknown_Anaeroplasmataceae	infant_taxa_12__Unknown_Anaeroplasmataceae	Infant Fecal Microbiome (Taxa)	1-2 months	stool_microbiome_infant	0.000491294	0.000491294	0.0366684	-0.225635	0.298972	0.783383	Higher in SVN
infant_taxa_12	Unknown_Anaeroplasmataceae.1	infant_taxa_12__Unknown_Anaeroplasmataceae.1	Infant Fecal Microbiome (Taxa)	1-2 months	stool_microbiome_infant	0.000491294	0.000491294	0.0366684	-0.225635	0.298972	0.783383	Higher in SVN
infant_taxa_12	Unknown_Anaeroplasmataceae.2	infant_taxa_12__Unknown_Anaeroplasmataceae.2	Infant Fecal Microbiome (Taxa)	1-2 months	stool_microbiome_infant	0.000491294	0.000491294	0.0366684	-0.225635	0.298972	0.783383	Higher in SVN
infant_taxa_12	Beduini.sp900550005	infant_taxa_12__Beduini.sp900550005	Infant Fecal Microbiome (Taxa)	1-2 months	stool_microbiome_infant	0.000491294	0.000491294	0.0366684	-0.225635	0.298972	0.783383	Higher in SVN
infant_taxa_12	Catenibacterium.mitsuokai	infant_taxa_12__Catenibacterium.mitsuokai	Infant Fecal Microbiome (Taxa)	1-2 months	stool_microbiome_infant	0.000491294	0.000491294	0.0366684	-0.225635	0.298972	0.783383	Higher in SVN
infant_taxa_12	Unknown_Catenibacterium	infant_taxa_12__Unknown_Catenibacterium	Infant Fecal Microbiome (Taxa)	1-2 months	stool_microbiome_infant	0.000491294	0.000491294	0.219571	-0.041498	0.48064	0.0989292	Higher in SVN
infant_taxa_12	Coprobacillus.cateniformis	infant_taxa_12__Coprobacillus.cateniformis	Infant Fecal Microbiome (Taxa)	1-2 months	stool_microbiome_infant	0.000491294	0.000491294	0.0366684	-0.225635	0.298972	0.783383	Higher in SVN
infant_taxa_12	Erysipelatoclostridium.sp000752095	infant_taxa_12__Erysipelatoclostridium.sp000752095	Infant Fecal Microbiome (Taxa)	1-2 months	stool_microbiome_infant	0.000491294	0.000491294	0.0366684	-0.225635	0.298972	0.783383	Higher in SVN
infant_taxa_12	Erysipelatoclostridium.sp003024675	infant_taxa_12__Erysipelatoclostridium.sp003024675	Infant Fecal Microbiome (Taxa)	1-2 months	stool_microbiome_infant	0.000491294	0.000491294	0.0366684	-0.225635	0.298972	0.783383	Higher in SVN
infant_taxa_12	Erysipelatoclostridium.sp900544435	infant_taxa_12__Erysipelatoclostridium.sp900544435	Infant Fecal Microbiome (Taxa)	1-2 months	stool_microbiome_infant	0.000491294	0.000491294	0.0366684	-0.225635	0.298972	0.783383	Higher in SVN
infant_taxa_12	Unknown_Bulleidia	infant_taxa_12__Unknown_Bulleidia	Infant Fecal Microbiome (Taxa)	1-2 months	stool_microbiome_infant	0.000491294	0.000491294	0.0366684	-0.225635	0.298972	0.783383	Higher in SVN
infant_taxa_12	Unknown_Bulleidia.1	infant_taxa_12__Unknown_Bulleidia.1	Infant Fecal Microbiome (Taxa)	1-2 months	stool_microbiome_infant	0.000491294	0.000491294	0.0366684	-0.225635	0.298972	0.783383	Higher in SVN
infant_taxa_12	Unknown_Bulleidia.2	infant_taxa_12__Unknown_Bulleidia.2	Infant Fecal Microbiome (Taxa)	1-2 months	stool_microbiome_infant	0.000491294	0.000491294	0.0366684	-0.225635	0.298972	0.783383	Higher in SVN
infant_taxa_12	Faecalicoccus.sp900546545	infant_taxa_12__Faecalicoccus.sp900546545	Infant Fecal Microbiome (Taxa)	1-2 months	stool_microbiome_infant	0.000491294	0.000491294	0.0366684	-0.225635	0.298972	0.783383	Higher in SVN
infant_taxa_12	Holdemanella.biformis	infant_taxa_12__Holdemanella.biformis	Infant Fecal Microbiome (Taxa)	1-2 months	stool_microbiome_infant	0.000491294	0.000491294	0.0366684	-0.225635	0.298972	0.783383	Higher in SVN
infant_taxa_12	Holdemanella.sp003458715	infant_taxa_12__Holdemanella.sp003458715	Infant Fecal Microbiome (Taxa)	1-2 months	stool_microbiome_infant	0.000491294	0.000491294	0.0366684	-0.225635	0.298972	0.783383	Higher in SVN
infant_taxa_12	Holdemanella.sp900547815	infant_taxa_12__Holdemanella.sp900547815	Infant Fecal Microbiome (Taxa)	1-2 months	stool_microbiome_infant	0.000491294	0.000491294	0.0366684	-0.225635	0.298972	0.783383	Higher in SVN
infant_taxa_12	Unknown_Holdemanella	infant_taxa_12__Unknown_Holdemanella	Infant Fecal Microbiome (Taxa)	1-2 months	stool_microbiome_infant	0.000491294	0.000491294	0.0366684	-0.225635	0.298972	0.783383	Higher in SVN
infant_taxa_12	Unknown_Holdemanella.1	infant_taxa_12__Unknown_Holdemanella.1	Infant Fecal Microbiome (Taxa)	1-2 months	stool_microbiome_infant	0.000491294	0.000491294	0.0366684	-0.225635	0.298972	0.783383	Higher in SVN
infant_taxa_12	Unknown_Holdemanella.2	infant_taxa_12__Unknown_Holdemanella.2	Infant Fecal Microbiome (Taxa)	1-2 months	stool_microbiome_infant	0.000491294	0.000491294	0.0366684	-0.225635	0.298972	0.783383	Higher in SVN
infant_taxa_12	UBA636.sp900546285	infant_taxa_12__UBA636.sp900546285	Infant Fecal Microbiome (Taxa)	1-2 months	stool_microbiome_infant	0.000491294	0.000491294	0.0366684	-0.225635	0.298972	0.783383	Higher in SVN
infant_taxa_12	Unknown_UBA636	infant_taxa_12__Unknown_UBA636	Infant Fecal Microbiome (Taxa)	1-2 months	stool_microbiome_infant	0.000491294	0.000491294	0.0366684	-0.225635	0.298972	0.783383	Higher in SVN
infant_taxa_12	Unknown_UBA636.1	infant_taxa_12__Unknown_UBA636.1	Infant Fecal Microbiome (Taxa)	1-2 months	stool_microbiome_infant	0.000491294	0.000491294	0.0366684	-0.225635	0.298972	0.783383	Higher in SVN
infant_taxa_12	Turicibacter.sp001543345	infant_taxa_12__Turicibacter.sp001543345	Infant Fecal Microbiome (Taxa)	1-2 months	stool_microbiome_infant	0.000491294	0.000491294	0.0366684	-0.225635	0.298972	0.783383	Higher in SVN
infant_taxa_12	Enterococcus_B.faecium_B	infant_taxa_12__Enterococcus_B.faecium_B	Infant Fecal Microbiome (Taxa)	1-2 months	stool_microbiome_infant	0.000491294	0.000491294	0.0366684	-0.225635	0.298972	0.783383	Higher in SVN
infant_taxa_12	Enterococcus_D.casseliflavus	infant_taxa_12__Enterococcus_D.casseliflavus	Infant Fecal Microbiome (Taxa)	1-2 months	stool_microbiome_infant	0.000491294	0.000491294	0.0366684	-0.225635	0.298972	0.783383	Higher in SVN
infant_taxa_12	Lactobacillus.amylovorus	infant_taxa_12__Lactobacillus.amylovorus	Infant Fecal Microbiome (Taxa)	1-2 months	stool_microbiome_infant	0.000491294	0.000491294	0.0366684	-0.225635	0.298972	0.783383	Higher in SVN
infant_taxa_12	Lactobacillus.delbrueckii	infant_taxa_12__Lactobacillus.delbrueckii	Infant Fecal Microbiome (Taxa)	1-2 months	stool_microbiome_infant	0.000491294	0.000491294	0.0366684	-0.225635	0.298972	0.783383	Higher in SVN
infant_taxa_12	Lactobacillus.iners	infant_taxa_12__Lactobacillus.iners	Infant Fecal Microbiome (Taxa)	1-2 months	stool_microbiome_infant	0.000491294	0.000491294	0.0366684	-0.225635	0.298972	0.783383	Higher in SVN
infant_taxa_12	Leuconostoc.sp900554745	infant_taxa_12__Leuconostoc.sp900554745	Infant Fecal Microbiome (Taxa)	1-2 months	stool_microbiome_infant	0.000491294	0.000491294	0.0366684	-0.225635	0.298972	0.783383	Higher in SVN
infant_taxa_12	Limosilactobacillus.sp900557215	infant_taxa_12__Limosilactobacillus.sp900557215	Infant Fecal Microbiome (Taxa)	1-2 months	stool_microbiome_infant	0.000491294	0.000491294	0.217168	-0.0439287	0.478265	0.102696	Higher in SVN
infant_taxa_12	Weissella.cibaria	infant_taxa_12__Weissella.cibaria	Infant Fecal Microbiome (Taxa)	1-2 months	stool_microbiome_infant	0.000491294	0.000491294	0.0366684	-0.225635	0.298972	0.783383	Higher in SVN
infant_taxa_12	Weissella.confusa	infant_taxa_12__Weissella.confusa	Infant Fecal Microbiome (Taxa)	1-2 months	stool_microbiome_infant	0.000491294	0.000491294	0.0366684	-0.225635	0.298972	0.783383	Higher in SVN
infant_taxa_12	Lactococcus.lactis	infant_taxa_12__Lactococcus.lactis	Infant Fecal Microbiome (Taxa)	1-2 months	stool_microbiome_infant	0.000491294	0.000491294	0.0366684	-0.225635	0.298972	0.783383	Higher in SVN
infant_taxa_12	Lactococcus.lactis_A	infant_taxa_12__Lactococcus.lactis_A	Infant Fecal Microbiome (Taxa)	1-2 months	stool_microbiome_infant	0.000491294	0.000491294	0.0366684	-0.225635	0.298972	0.783383	Higher in SVN
infant_taxa_12	Streptococcus.anginosus_C	infant_taxa_12__Streptococcus.anginosus_C	Infant Fecal Microbiome (Taxa)	1-2 months	stool_microbiome_infant	0.000491294	0.000491294	0.0366684	-0.225635	0.298972	0.783383	Higher in SVN
infant_taxa_12	Streptococcus.constellatus	infant_taxa_12__Streptococcus.constellatus	Infant Fecal Microbiome (Taxa)	1-2 months	stool_microbiome_infant	0.000491294	0.000491294	0.0366684	-0.225635	0.298972	0.783383	Higher in SVN
infant_taxa_12	Streptococcus.gordonii	infant_taxa_12__Streptococcus.gordonii	Infant Fecal Microbiome (Taxa)	1-2 months	stool_microbiome_infant	0.000491294	0.000491294	0.217365	-0.0437298	0.478459	0.102384	Higher in SVN
infant_taxa_12	Streptococcus.infantarius	infant_taxa_12__Streptococcus.infantarius	Infant Fecal Microbiome (Taxa)	1-2 months	stool_microbiome_infant	0.000491294	0.000491294	0.0366684	-0.225635	0.298972	0.783383	Higher in SVN
infant_taxa_12	Streptococcus.mutans	infant_taxa_12__Streptococcus.mutans	Infant Fecal Microbiome (Taxa)	1-2 months	stool_microbiome_infant	0.000491294	0.000491294	0.0366684	-0.225635	0.298972	0.783383	Higher in SVN
infant_taxa_12	Streptococcus.sp004166885	infant_taxa_12__Streptococcus.sp004166885	Infant Fecal Microbiome (Taxa)	1-2 months	stool_microbiome_infant	0.000491294	0.000491294	0.0366684	-0.225635	0.298972	0.783383	Higher in SVN
infant_taxa_12	Streptococcus.thermophilus	infant_taxa_12__Streptococcus.thermophilus	Infant Fecal Microbiome (Taxa)	1-2 months	stool_microbiome_infant	0.000491294	0.000491294	0.0366684	-0.225635	0.298972	0.783383	Higher in SVN
infant_taxa_12	Unknown_Streptococcus	infant_taxa_12__Unknown_Streptococcus	Infant Fecal Microbiome (Taxa)	1-2 months	stool_microbiome_infant	0.000491294	0.000491294	0.0366684	-0.225635	0.298972	0.783383	Higher in SVN
infant_taxa_12	Unknown_Streptococcus.3	infant_taxa_12__Unknown_Streptococcus.3	Infant Fecal Microbiome (Taxa)	1-2 months	stool_microbiome_infant	0.000491294	0.000491294	0.0366684	-0.225635	0.298972	0.783383	Higher in SVN
infant_taxa_12	Unknown_Streptococcus.4	infant_taxa_12__Unknown_Streptococcus.4	Infant Fecal Microbiome (Taxa)	1-2 months	stool_microbiome_infant	0.000491294	0.000491294	0.0366684	-0.225635	0.298972	0.783383	Higher in SVN
infant_taxa_12	UMGS75.sp900538885	infant_taxa_12__UMGS75.sp900538885	Infant Fecal Microbiome (Taxa)	1-2 months	stool_microbiome_infant	0.000491294	0.000491294	0.0366684	-0.225635	0.298972	0.783383	Higher in SVN
infant_taxa_12	Unknown_UMGS75	infant_taxa_12__Unknown_UMGS75	Infant Fecal Microbiome (Taxa)	1-2 months	stool_microbiome_infant	0.000491294	0.000491294	0.0366684	-0.225635	0.298972	0.783383	Higher in SVN
infant_taxa_12	Unknown_UMGS75.1	infant_taxa_12__Unknown_UMGS75.1	Infant Fecal Microbiome (Taxa)	1-2 months	stool_microbiome_infant	0.000491294	0.000491294	0.0366684	-0.225635	0.298972	0.783383	Higher in SVN
infant_taxa_12	CAG.698.sp000431235	infant_taxa_12__CAG.698.sp000431235	Infant Fecal Microbiome (Taxa)	1-2 months	stool_microbiome_infant	0.000491294	0.000491294	0.0366684	-0.225635	0.298972	0.783383	Higher in SVN
infant_taxa_12	Tener.01.sp001940985	infant_taxa_12__Tener.01.sp001940985	Infant Fecal Microbiome (Taxa)	1-2 months	stool_microbiome_infant	0.000491294	0.000491294	0.0366684	-0.225635	0.298972	0.783383	Higher in SVN
infant_taxa_12	CAG.1000.sp004560915	infant_taxa_12__CAG.1000.sp004560915	Infant Fecal Microbiome (Taxa)	1-2 months	stool_microbiome_infant	0.000491294	0.000491294	0.0366684	-0.225635	0.298972	0.783383	Higher in SVN
infant_taxa_12	CAG.1000.sp900556025	infant_taxa_12__CAG.1000.sp900556025	Infant Fecal Microbiome (Taxa)	1-2 months	stool_microbiome_infant	0.000491294	0.000491294	0.0366684	-0.225635	0.298972	0.783383	Higher in SVN
infant_taxa_12	Unknown_CAG.1000_1	infant_taxa_12__Unknown_CAG.1000_1	Infant Fecal Microbiome (Taxa)	1-2 months	stool_microbiome_infant	0.000491294	0.000491294	0.0366684	-0.225635	0.298972	0.783383	Higher in SVN
infant_taxa_12	Unknown_CAG.1000_1.2	infant_taxa_12__Unknown_CAG.1000_1.2	Infant Fecal Microbiome (Taxa)	1-2 months	stool_microbiome_infant	0.000491294	0.000491294	0.0366684	-0.225635	0.298972	0.783383	Higher in SVN
infant_taxa_12	Unknown_CAG.1000_1.3	infant_taxa_12__Unknown_CAG.1000_1.3	Infant Fecal Microbiome (Taxa)	1-2 months	stool_microbiome_infant	0.000491294	0.000491294	0.0366684	-0.225635	0.298972	0.783383	Higher in SVN
infant_taxa_12	Unknown_CAG.1000_1.6	infant_taxa_12__Unknown_CAG.1000_1.6	Infant Fecal Microbiome (Taxa)	1-2 months	stool_microbiome_infant	0.000491294	0.000491294	0.0366684	-0.225635	0.298972	0.783383	Higher in SVN
infant_taxa_12	Unknown_CAG.1000_1.7	infant_taxa_12__Unknown_CAG.1000_1.7	Infant Fecal Microbiome (Taxa)	1-2 months	stool_microbiome_infant	0.000491294	0.000491294	0.0366684	-0.225635	0.298972	0.783383	Higher in SVN
infant_taxa_12	Unknown_CAG.1000_1.8	infant_taxa_12__Unknown_CAG.1000_1.8	Infant Fecal Microbiome (Taxa)	1-2 months	stool_microbiome_infant	0.000491294	0.000491294	0.0366684	-0.225635	0.298972	0.783383	Higher in SVN
infant_taxa_12	Unknown_CAG.1000_1.9	infant_taxa_12__Unknown_CAG.1000_1.9	Infant Fecal Microbiome (Taxa)	1-2 months	stool_microbiome_infant	0.000491294	0.000491294	0.0366684	-0.225635	0.298972	0.783383	Higher in SVN
infant_taxa_12	Unknown_CAG.1000_1.10	infant_taxa_12__Unknown_CAG.1000_1.10	Infant Fecal Microbiome (Taxa)	1-2 months	stool_microbiome_infant	0.000491294	0.000491294	0.0366684	-0.225635	0.298972	0.783383	Higher in SVN
infant_taxa_12	CAG.460.sp900544625	infant_taxa_12__CAG.460.sp900544625	Infant Fecal Microbiome (Taxa)	1-2 months	stool_microbiome_infant	0.000491294	0.000491294	0.0366684	-0.225635	0.298972	0.783383	Higher in SVN
infant_taxa_12	CAG.460.sp900551525	infant_taxa_12__CAG.460.sp900551525	Infant Fecal Microbiome (Taxa)	1-2 months	stool_microbiome_infant	0.000491294	0.000491294	0.0366684	-0.225635	0.298972	0.783383	Higher in SVN
infant_taxa_12	Unknown_CAG.460	infant_taxa_12__Unknown_CAG.460	Infant Fecal Microbiome (Taxa)	1-2 months	stool_microbiome_infant	0.000491294	0.000491294	0.0366684	-0.225635	0.298972	0.783383	Higher in SVN
infant_taxa_12	Unknown_CAG.460.2	infant_taxa_12__Unknown_CAG.460.2	Infant Fecal Microbiome (Taxa)	1-2 months	stool_microbiome_infant	0.000491294	0.000491294	0.0366684	-0.225635	0.298972	0.783383	Higher in SVN
infant_taxa_12	Unknown_CAG.460.3	infant_taxa_12__Unknown_CAG.460.3	Infant Fecal Microbiome (Taxa)	1-2 months	stool_microbiome_infant	0.000491294	0.000491294	0.0366684	-0.225635	0.298972	0.783383	Higher in SVN
infant_taxa_12	Unknown_CAG.460.6	infant_taxa_12__Unknown_CAG.460.6	Infant Fecal Microbiome (Taxa)	1-2 months	stool_microbiome_infant	0.000491294	0.000491294	0.0366684	-0.225635	0.298972	0.783383	Higher in SVN
infant_taxa_12	Unknown_CAG.460.7	infant_taxa_12__Unknown_CAG.460.7	Infant Fecal Microbiome (Taxa)	1-2 months	stool_microbiome_infant	0.000491294	0.000491294	0.0366684	-0.225635	0.298972	0.783383	Higher in SVN
infant_taxa_12	Unknown_CAG.460.8	infant_taxa_12__Unknown_CAG.460.8	Infant Fecal Microbiome (Taxa)	1-2 months	stool_microbiome_infant	0.000491294	0.000491294	0.0366684	-0.225635	0.298972	0.783383	Higher in SVN
infant_taxa_12	Unknown_CAG.460.9	infant_taxa_12__Unknown_CAG.460.9	Infant Fecal Microbiome (Taxa)	1-2 months	stool_microbiome_infant	0.000491294	0.000491294	0.0366684	-0.225635	0.298972	0.783383	Higher in SVN
infant_taxa_12	Unknown_CAG.460.10	infant_taxa_12__Unknown_CAG.460.10	Infant Fecal Microbiome (Taxa)	1-2 months	stool_microbiome_infant	0.000491294	0.000491294	0.0366684	-0.225635	0.298972	0.783383	Higher in SVN
infant_taxa_12	Unknown_CAG.460.14	infant_taxa_12__Unknown_CAG.460.14	Infant Fecal Microbiome (Taxa)	1-2 months	stool_microbiome_infant	0.000491294	0.000491294	0.0366684	-0.225635	0.298972	0.783383	Higher in SVN
infant_taxa_12	Unknown_CAG.460.15	infant_taxa_12__Unknown_CAG.460.15	Infant Fecal Microbiome (Taxa)	1-2 months	stool_microbiome_infant	0.000491294	0.000491294	0.0366684	-0.225635	0.298972	0.783383	Higher in SVN
infant_taxa_12	Unknown_CAG.460.16	infant_taxa_12__Unknown_CAG.460.16	Infant Fecal Microbiome (Taxa)	1-2 months	stool_microbiome_infant	0.000491294	0.000491294	0.0366684	-0.225635	0.298972	0.783383	Higher in SVN
infant_taxa_12	Unknown_CAG.460.18	infant_taxa_12__Unknown_CAG.460.18	Infant Fecal Microbiome (Taxa)	1-2 months	stool_microbiome_infant	0.000491294	0.000491294	0.0366684	-0.225635	0.298972	0.783383	Higher in SVN
infant_taxa_12	CAG.533.sp000434495	infant_taxa_12__CAG.533.sp000434495	Infant Fecal Microbiome (Taxa)	1-2 months	stool_microbiome_infant	0.000491294	0.000491294	0.0366684	-0.225635	0.298972	0.783383	Higher in SVN
infant_taxa_12	CAG.533.sp900553855	infant_taxa_12__CAG.533.sp900553855	Infant Fecal Microbiome (Taxa)	1-2 months	stool_microbiome_infant	0.000491294	0.000491294	0.0366684	-0.225635	0.298972	0.783383	Higher in SVN
infant_taxa_12	Unknown_CAG.533	infant_taxa_12__Unknown_CAG.533	Infant Fecal Microbiome (Taxa)	1-2 months	stool_microbiome_infant	0.000491294	0.000491294	0.0366684	-0.225635	0.298972	0.783383	Higher in SVN
infant_taxa_12	Unknown_CAG.533.1	infant_taxa_12__Unknown_CAG.533.1	Infant Fecal Microbiome (Taxa)	1-2 months	stool_microbiome_infant	0.000491294	0.000491294	0.0366684	-0.225635	0.298972	0.783383	Higher in SVN
infant_taxa_12	Unknown_CAG.533.2	infant_taxa_12__Unknown_CAG.533.2	Infant Fecal Microbiome (Taxa)	1-2 months	stool_microbiome_infant	0.000491294	0.000491294	0.0366684	-0.225635	0.298972	0.783383	Higher in SVN
infant_taxa_12	Unknown_CAG.533.3	infant_taxa_12__Unknown_CAG.533.3	Infant Fecal Microbiome (Taxa)	1-2 months	stool_microbiome_infant	0.000491294	0.000491294	0.0366684	-0.225635	0.298972	0.783383	Higher in SVN
infant_taxa_12	Unknown_CAG.533.7	infant_taxa_12__Unknown_CAG.533.7	Infant Fecal Microbiome (Taxa)	1-2 months	stool_microbiome_infant	0.000491294	0.000491294	0.0366684	-0.225635	0.298972	0.783383	Higher in SVN
infant_taxa_12	Unknown_CAG.533.8	infant_taxa_12__Unknown_CAG.533.8	Infant Fecal Microbiome (Taxa)	1-2 months	stool_microbiome_infant	0.000491294	0.000491294	0.0366684	-0.225635	0.298972	0.783383	Higher in SVN
infant_taxa_12	Unknown_CAG.533.9	infant_taxa_12__Unknown_CAG.533.9	Infant Fecal Microbiome (Taxa)	1-2 months	stool_microbiome_infant	0.000491294	0.000491294	0.0366684	-0.225635	0.298972	0.783383	Higher in SVN
infant_taxa_12	CAG.582.sp000435515	infant_taxa_12__CAG.582.sp000435515	Infant Fecal Microbiome (Taxa)	1-2 months	stool_microbiome_infant	0.000491294	0.000491294	0.0366684	-0.225635	0.298972	0.783383	Higher in SVN
infant_taxa_12	Unknown_CAG.582	infant_taxa_12__Unknown_CAG.582	Infant Fecal Microbiome (Taxa)	1-2 months	stool_microbiome_infant	0.000491294	0.000491294	0.0366684	-0.225635	0.298972	0.783383	Higher in SVN
infant_taxa_12	Unknown_CAG.582.3	infant_taxa_12__Unknown_CAG.582.3	Infant Fecal Microbiome (Taxa)	1-2 months	stool_microbiome_infant	0.000491294	0.000491294	0.0366684	-0.225635	0.298972	0.783383	Higher in SVN
infant_taxa_12	CAG.605.sp000433255	infant_taxa_12__CAG.605.sp000433255	Infant Fecal Microbiome (Taxa)	1-2 months	stool_microbiome_infant	0.000491294	0.000491294	0.0366684	-0.225635	0.298972	0.783383	Higher in SVN
infant_taxa_12	CAG.605.sp000433475	infant_taxa_12__CAG.605.sp000433475	Infant Fecal Microbiome (Taxa)	1-2 months	stool_microbiome_infant	0.000491294	0.000491294	0.0366684	-0.225635	0.298972	0.783383	Higher in SVN
infant_taxa_12	CAG.605.sp900545005	infant_taxa_12__CAG.605.sp900545005	Infant Fecal Microbiome (Taxa)	1-2 months	stool_microbiome_infant	0.000491294	0.000491294	0.0366684	-0.225635	0.298972	0.783383	Higher in SVN
infant_taxa_12	Unknown_CAG.605	infant_taxa_12__Unknown_CAG.605	Infant Fecal Microbiome (Taxa)	1-2 months	stool_microbiome_infant	0.000491294	0.000491294	0.0366684	-0.225635	0.298972	0.783383	Higher in SVN
infant_taxa_12	Unknown_CAG.605.4	infant_taxa_12__Unknown_CAG.605.4	Infant Fecal Microbiome (Taxa)	1-2 months	stool_microbiome_infant	0.000491294	0.000491294	0.0366684	-0.225635	0.298972	0.783383	Higher in SVN
infant_taxa_12	Unknown_CAG.605.5	infant_taxa_12__Unknown_CAG.605.5	Infant Fecal Microbiome (Taxa)	1-2 months	stool_microbiome_infant	0.000491294	0.000491294	0.0366684	-0.225635	0.298972	0.783383	Higher in SVN
infant_taxa_12	Unknown_CAG.605.6	infant_taxa_12__Unknown_CAG.605.6	Infant Fecal Microbiome (Taxa)	1-2 months	stool_microbiome_infant	0.000491294	0.000491294	0.0366684	-0.225635	0.298972	0.783383	Higher in SVN
infant_taxa_12	Unknown_CAG.605.8	infant_taxa_12__Unknown_CAG.605.8	Infant Fecal Microbiome (Taxa)	1-2 months	stool_microbiome_infant	0.000491294	0.000491294	0.0366684	-0.225635	0.298972	0.783383	Higher in SVN
infant_taxa_12	Unknown_CAG.605.9	infant_taxa_12__Unknown_CAG.605.9	Infant Fecal Microbiome (Taxa)	1-2 months	stool_microbiome_infant	0.000491294	0.000491294	0.0366684	-0.225635	0.298972	0.783383	Higher in SVN
infant_taxa_12	CAG.628.sp900553835	infant_taxa_12__CAG.628.sp900553835	Infant Fecal Microbiome (Taxa)	1-2 months	stool_microbiome_infant	0.000491294	0.000491294	0.0366684	-0.225635	0.298972	0.783383	Higher in SVN
infant_taxa_12	Unknown_CAG.628	infant_taxa_12__Unknown_CAG.628	Infant Fecal Microbiome (Taxa)	1-2 months	stool_microbiome_infant	0.000491294	0.000491294	0.0366684	-0.225635	0.298972	0.783383	Higher in SVN
infant_taxa_12	Unknown_CAG.628.1	infant_taxa_12__Unknown_CAG.628.1	Infant Fecal Microbiome (Taxa)	1-2 months	stool_microbiome_infant	0.000491294	0.000491294	0.0366684	-0.225635	0.298972	0.783383	Higher in SVN
infant_taxa_12	Unknown_CAG.628.2	infant_taxa_12__Unknown_CAG.628.2	Infant Fecal Microbiome (Taxa)	1-2 months	stool_microbiome_infant	0.000491294	0.000491294	0.0366684	-0.225635	0.298972	0.783383	Higher in SVN
infant_taxa_12	Unknown_CAG.628.3	infant_taxa_12__Unknown_CAG.628.3	Infant Fecal Microbiome (Taxa)	1-2 months	stool_microbiome_infant	0.000491294	0.000491294	0.0366684	-0.225635	0.298972	0.783383	Higher in SVN
infant_taxa_12	Unknown_UBA11963.1	infant_taxa_12__Unknown_UBA11963.1	Infant Fecal Microbiome (Taxa)	1-2 months	stool_microbiome_infant	0.000491294	0.000491294	0.0366684	-0.225635	0.298972	0.783383	Higher in SVN
infant_taxa_12	UMGS1124.sp900548725	infant_taxa_12__UMGS1124.sp900548725	Infant Fecal Microbiome (Taxa)	1-2 months	stool_microbiome_infant	0.000491294	0.000491294	0.0366684	-0.225635	0.298972	0.783383	Higher in SVN
infant_taxa_12	Unknown_UMGS1124	infant_taxa_12__Unknown_UMGS1124	Infant Fecal Microbiome (Taxa)	1-2 months	stool_microbiome_infant	0.000491294	0.000491294	0.0366684	-0.225635	0.298972	0.783383	Higher in SVN
infant_taxa_12	Unknown_UMGS1124.2	infant_taxa_12__Unknown_UMGS1124.2	Infant Fecal Microbiome (Taxa)	1-2 months	stool_microbiome_infant	0.000491294	0.000491294	0.0366684	-0.225635	0.298972	0.783383	Higher in SVN
infant_taxa_12	Unknown_UMGS1124.3	infant_taxa_12__Unknown_UMGS1124.3	Infant Fecal Microbiome (Taxa)	1-2 months	stool_microbiome_infant	0.000491294	0.000491294	0.0366684	-0.225635	0.298972	0.783383	Higher in SVN
infant_taxa_12	Unknown_UMGS1124.6	infant_taxa_12__Unknown_UMGS1124.6	Infant Fecal Microbiome (Taxa)	1-2 months	stool_microbiome_infant	0.000491294	0.000491294	0.0366684	-0.225635	0.298972	0.783383	Higher in SVN
infant_taxa_12	Unknown_UMGS1124.7	infant_taxa_12__Unknown_UMGS1124.7	Infant Fecal Microbiome (Taxa)	1-2 months	stool_microbiome_infant	0.000491294	0.000491294	0.0366684	-0.225635	0.298972	0.783383	Higher in SVN
infant_taxa_12	Unknown_UMGS1124.8	infant_taxa_12__Unknown_UMGS1124.8	Infant Fecal Microbiome (Taxa)	1-2 months	stool_microbiome_infant	0.000491294	0.000491294	0.0366684	-0.225635	0.298972	0.783383	Higher in SVN
infant_taxa_12	UMGS1217.sp900549625	infant_taxa_12__UMGS1217.sp900549625	Infant Fecal Microbiome (Taxa)	1-2 months	stool_microbiome_infant	0.000491294	0.000491294	0.0366684	-0.225635	0.298972	0.783383	Higher in SVN
infant_taxa_12	Unknown_UMGS1217	infant_taxa_12__Unknown_UMGS1217	Infant Fecal Microbiome (Taxa)	1-2 months	stool_microbiome_infant	0.000491294	0.000491294	0.0366684	-0.225635	0.298972	0.783383	Higher in SVN
infant_taxa_12	Unknown_UMGS1217.4	infant_taxa_12__Unknown_UMGS1217.4	Infant Fecal Microbiome (Taxa)	1-2 months	stool_microbiome_infant	0.000491294	0.000491294	0.0366684	-0.225635	0.298972	0.783383	Higher in SVN
infant_taxa_12	Unknown_UMGS1217.5	infant_taxa_12__Unknown_UMGS1217.5	Infant Fecal Microbiome (Taxa)	1-2 months	stool_microbiome_infant	0.000491294	0.000491294	0.0366684	-0.225635	0.298972	0.783383	Higher in SVN
infant_taxa_12	Unknown_UMGS1217.6	infant_taxa_12__Unknown_UMGS1217.6	Infant Fecal Microbiome (Taxa)	1-2 months	stool_microbiome_infant	0.000491294	0.000491294	0.0366684	-0.225635	0.298972	0.783383	Higher in SVN
infant_taxa_12	Unknown_CAG.1000_2.1	infant_taxa_12__Unknown_CAG.1000_2.1	Infant Fecal Microbiome (Taxa)	1-2 months	stool_microbiome_infant	0.000491294	0.000491294	0.0366684	-0.225635	0.298972	0.783383	Higher in SVN
infant_taxa_12	Unknown_CAG.1000_2.2	infant_taxa_12__Unknown_CAG.1000_2.2	Infant Fecal Microbiome (Taxa)	1-2 months	stool_microbiome_infant	0.000491294	0.000491294	0.0366684	-0.225635	0.298972	0.783383	Higher in SVN
infant_taxa_12	Unknown_CAG.1000_2.5	infant_taxa_12__Unknown_CAG.1000_2.5	Infant Fecal Microbiome (Taxa)	1-2 months	stool_microbiome_infant	0.000491294	0.000491294	0.0366684	-0.225635	0.298972	0.783383	Higher in SVN
infant_taxa_12	Unknown_CAG.1000_2.6	infant_taxa_12__Unknown_CAG.1000_2.6	Infant Fecal Microbiome (Taxa)	1-2 months	stool_microbiome_infant	0.000491294	0.000491294	0.0366684	-0.225635	0.298972	0.783383	Higher in SVN
infant_taxa_12	Unknown_CAG.1000_2.7	infant_taxa_12__Unknown_CAG.1000_2.7	Infant Fecal Microbiome (Taxa)	1-2 months	stool_microbiome_infant	0.000491294	0.000491294	0.0366684	-0.225635	0.298972	0.783383	Higher in SVN
infant_taxa_12	CAG.302.sp000431795	infant_taxa_12__CAG.302.sp000431795	Infant Fecal Microbiome (Taxa)	1-2 months	stool_microbiome_infant	0.000491294	0.000491294	0.0366684	-0.225635	0.298972	0.783383	Higher in SVN
infant_taxa_12	CAG.302.sp001916775	infant_taxa_12__CAG.302.sp001916775	Infant Fecal Microbiome (Taxa)	1-2 months	stool_microbiome_infant	0.000491294	0.000491294	0.0366684	-0.225635	0.298972	0.783383	Higher in SVN
infant_taxa_12	CAG.302.sp900549325	infant_taxa_12__CAG.302.sp900549325	Infant Fecal Microbiome (Taxa)	1-2 months	stool_microbiome_infant	0.000491294	0.000491294	0.0366684	-0.225635	0.298972	0.783383	Higher in SVN
infant_taxa_12	CAG.302.sp900554615	infant_taxa_12__CAG.302.sp900554615	Infant Fecal Microbiome (Taxa)	1-2 months	stool_microbiome_infant	0.000491294	0.000491294	0.0366684	-0.225635	0.298972	0.783383	Higher in SVN
infant_taxa_12	Unknown_CAG.302_1	infant_taxa_12__Unknown_CAG.302_1	Infant Fecal Microbiome (Taxa)	1-2 months	stool_microbiome_infant	0.000491294	0.000491294	0.0366684	-0.225635	0.298972	0.783383	Higher in SVN
infant_taxa_12	Unknown_CAG.302_1.2	infant_taxa_12__Unknown_CAG.302_1.2	Infant Fecal Microbiome (Taxa)	1-2 months	stool_microbiome_infant	0.000491294	0.000491294	0.0366684	-0.225635	0.298972	0.783383	Higher in SVN
infant_taxa_12	Unknown_CAG.302_1.3	infant_taxa_12__Unknown_CAG.302_1.3	Infant Fecal Microbiome (Taxa)	1-2 months	stool_microbiome_infant	0.000491294	0.000491294	0.0366684	-0.225635	0.298972	0.783383	Higher in SVN
infant_taxa_12	Unknown_CAG.302_1.6	infant_taxa_12__Unknown_CAG.302_1.6	Infant Fecal Microbiome (Taxa)	1-2 months	stool_microbiome_infant	0.000491294	0.000491294	0.0366684	-0.225635	0.298972	0.783383	Higher in SVN
infant_taxa_12	CAG.762.sp000432575	infant_taxa_12__CAG.762.sp000432575	Infant Fecal Microbiome (Taxa)	1-2 months	stool_microbiome_infant	0.000491294	0.000491294	0.0366684	-0.225635	0.298972	0.783383	Higher in SVN
infant_taxa_12	Unknown_CAG.762	infant_taxa_12__Unknown_CAG.762	Infant Fecal Microbiome (Taxa)	1-2 months	stool_microbiome_infant	0.000491294	0.000491294	0.0366684	-0.225635	0.298972	0.783383	Higher in SVN
infant_taxa_12	Unknown_CAG.762.1	infant_taxa_12__Unknown_CAG.762.1	Infant Fecal Microbiome (Taxa)	1-2 months	stool_microbiome_infant	0.000491294	0.000491294	0.0366684	-0.225635	0.298972	0.783383	Higher in SVN
infant_taxa_12	CAG.914.sp000437895	infant_taxa_12__CAG.914.sp000437895	Infant Fecal Microbiome (Taxa)	1-2 months	stool_microbiome_infant	0.000491294	0.000491294	0.0366684	-0.225635	0.298972	0.783383	Higher in SVN
infant_taxa_12	Unknown_RUG705.2	infant_taxa_12__Unknown_RUG705.2	Infant Fecal Microbiome (Taxa)	1-2 months	stool_microbiome_infant	0.000491294	0.000491294	0.0366684	-0.225635	0.298972	0.783383	Higher in SVN
infant_taxa_12	Unknown_RUG705.3	infant_taxa_12__Unknown_RUG705.3	Infant Fecal Microbiome (Taxa)	1-2 months	stool_microbiome_infant	0.000491294	0.000491294	0.0366684	-0.225635	0.298972	0.783383	Higher in SVN
infant_taxa_12	Unknown_UBA6414	infant_taxa_12__Unknown_UBA6414	Infant Fecal Microbiome (Taxa)	1-2 months	stool_microbiome_infant	0.000491294	0.000491294	0.0366684	-0.225635	0.298972	0.783383	Higher in SVN
infant_taxa_12	UMGS2068.sp900557675	infant_taxa_12__UMGS2068.sp900557675	Infant Fecal Microbiome (Taxa)	1-2 months	stool_microbiome_infant	0.000491294	0.000491294	0.0366684	-0.225635	0.298972	0.783383	Higher in SVN
infant_taxa_12	Unknown_CAG.302_2	infant_taxa_12__Unknown_CAG.302_2	Infant Fecal Microbiome (Taxa)	1-2 months	stool_microbiome_infant	0.000491294	0.000491294	0.0366684	-0.225635	0.298972	0.783383	Higher in SVN
infant_taxa_12	Unknown_CAG.302_2.3	infant_taxa_12__Unknown_CAG.302_2.3	Infant Fecal Microbiome (Taxa)	1-2 months	stool_microbiome_infant	0.000491294	0.000491294	0.0366684	-0.225635	0.298972	0.783383	Higher in SVN
infant_taxa_12	Unknown_CAG.302_2.4	infant_taxa_12__Unknown_CAG.302_2.4	Infant Fecal Microbiome (Taxa)	1-2 months	stool_microbiome_infant	0.000491294	0.000491294	0.0366684	-0.225635	0.298972	0.783383	Higher in SVN
infant_taxa_12	Unknown_CAG.302_2.5	infant_taxa_12__Unknown_CAG.302_2.5	Infant Fecal Microbiome (Taxa)	1-2 months	stool_microbiome_infant	0.000491294	0.000491294	0.0366684	-0.225635	0.298972	0.783383	Higher in SVN
infant_taxa_12	Unknown_CAG.302_2.6	infant_taxa_12__Unknown_CAG.302_2.6	Infant Fecal Microbiome (Taxa)	1-2 months	stool_microbiome_infant	0.000491294	0.000491294	0.0366684	-0.225635	0.298972	0.783383	Higher in SVN
infant_taxa_12	Unknown_CAG.302_2.7	infant_taxa_12__Unknown_CAG.302_2.7	Infant Fecal Microbiome (Taxa)	1-2 months	stool_microbiome_infant	0.000491294	0.000491294	0.0366684	-0.225635	0.298972	0.783383	Higher in SVN
infant_taxa_12	Unknown_CAG.302_2.11	infant_taxa_12__Unknown_CAG.302_2.11	Infant Fecal Microbiome (Taxa)	1-2 months	stool_microbiome_infant	0.000491294	0.000491294	0.0366684	-0.225635	0.298972	0.783383	Higher in SVN
infant_taxa_12	Unknown_CAG.302_2.12	infant_taxa_12__Unknown_CAG.302_2.12	Infant Fecal Microbiome (Taxa)	1-2 months	stool_microbiome_infant	0.000491294	0.000491294	0.0366684	-0.225635	0.298972	0.783383	Higher in SVN
infant_taxa_12	Unknown_CAG.302_2.13	infant_taxa_12__Unknown_CAG.302_2.13	Infant Fecal Microbiome (Taxa)	1-2 months	stool_microbiome_infant	0.000491294	0.000491294	0.0366684	-0.225635	0.298972	0.783383	Higher in SVN
infant_taxa_12	Unknown_CAG.302_2.15	infant_taxa_12__Unknown_CAG.302_2.15	Infant Fecal Microbiome (Taxa)	1-2 months	stool_microbiome_infant	0.000491294	0.000491294	0.0366684	-0.225635	0.298972	0.783383	Higher in SVN
infant_taxa_12	CAG.433.sp000433675	infant_taxa_12__CAG.433.sp000433675	Infant Fecal Microbiome (Taxa)	1-2 months	stool_microbiome_infant	0.000491294	0.000491294	0.0366684	-0.225635	0.298972	0.783383	Higher in SVN
infant_taxa_12	Unknown_CAG.433_1.1	infant_taxa_12__Unknown_CAG.433_1.1	Infant Fecal Microbiome (Taxa)	1-2 months	stool_microbiome_infant	0.000491294	0.000491294	0.0366684	-0.225635	0.298972	0.783383	Higher in SVN
infant_taxa_12	CAG.594.sp000434835	infant_taxa_12__CAG.594.sp000434835	Infant Fecal Microbiome (Taxa)	1-2 months	stool_microbiome_infant	0.000491294	0.000491294	0.0366684	-0.225635	0.298972	0.783383	Higher in SVN
infant_taxa_12	CAG.594.sp900547225	infant_taxa_12__CAG.594.sp900547225	Infant Fecal Microbiome (Taxa)	1-2 months	stool_microbiome_infant	0.000491294	0.000491294	0.0366684	-0.225635	0.298972	0.783383	Higher in SVN
infant_taxa_12	Unknown_CAG.594	infant_taxa_12__Unknown_CAG.594	Infant Fecal Microbiome (Taxa)	1-2 months	stool_microbiome_infant	0.000491294	0.000491294	0.0366684	-0.225635	0.298972	0.783383	Higher in SVN
infant_taxa_12	Unknown_CAG.594.1	infant_taxa_12__Unknown_CAG.594.1	Infant Fecal Microbiome (Taxa)	1-2 months	stool_microbiome_infant	0.000491294	0.000491294	0.0366684	-0.225635	0.298972	0.783383	Higher in SVN
infant_taxa_12	Unknown_CAG.594.5	infant_taxa_12__Unknown_CAG.594.5	Infant Fecal Microbiome (Taxa)	1-2 months	stool_microbiome_infant	0.000491294	0.000491294	0.0366684	-0.225635	0.298972	0.783383	Higher in SVN
infant_taxa_12	Unknown_CAG.594.6	infant_taxa_12__Unknown_CAG.594.6	Infant Fecal Microbiome (Taxa)	1-2 months	stool_microbiome_infant	0.000491294	0.000491294	0.0366684	-0.225635	0.298972	0.783383	Higher in SVN
infant_taxa_12	Unknown_CAG.594.7	infant_taxa_12__Unknown_CAG.594.7	Infant Fecal Microbiome (Taxa)	1-2 months	stool_microbiome_infant	0.000491294	0.000491294	0.0366684	-0.225635	0.298972	0.783383	Higher in SVN
infant_taxa_12	Unknown_CAG.433_2.1	infant_taxa_12__Unknown_CAG.433_2.1	Infant Fecal Microbiome (Taxa)	1-2 months	stool_microbiome_infant	0.000491294	0.000491294	0.0366684	-0.225635	0.298972	0.783383	Higher in SVN
infant_taxa_12	CAG.417.sp000432835	infant_taxa_12__CAG.417.sp000432835	Infant Fecal Microbiome (Taxa)	1-2 months	stool_microbiome_infant	0.000491294	0.000491294	0.0366684	-0.225635	0.298972	0.783383	Higher in SVN
infant_taxa_12	Unknown_CAG.451.1	infant_taxa_12__Unknown_CAG.451.1	Infant Fecal Microbiome (Taxa)	1-2 months	stool_microbiome_infant	0.000491294	0.000491294	0.0366684	-0.225635	0.298972	0.783383	Higher in SVN
infant_taxa_12	Unknown_CAG.451.2	infant_taxa_12__Unknown_CAG.451.2	Infant Fecal Microbiome (Taxa)	1-2 months	stool_microbiome_infant	0.000491294	0.000491294	0.0366684	-0.225635	0.298972	0.783383	Higher in SVN
infant_taxa_12	Unknown_CAG.451.3	infant_taxa_12__Unknown_CAG.451.3	Infant Fecal Microbiome (Taxa)	1-2 months	stool_microbiome_infant	0.000491294	0.000491294	0.0366684	-0.225635	0.298972	0.783383	Higher in SVN
infant_taxa_12	Unknown_CAG.451.4	infant_taxa_12__Unknown_CAG.451.4	Infant Fecal Microbiome (Taxa)	1-2 months	stool_microbiome_infant	0.000491294	0.000491294	0.0366684	-0.225635	0.298972	0.783383	Higher in SVN
infant_taxa_12	Unknown_CAG.451.5	infant_taxa_12__Unknown_CAG.451.5	Infant Fecal Microbiome (Taxa)	1-2 months	stool_microbiome_infant	0.000491294	0.000491294	0.0366684	-0.225635	0.298972	0.783383	Higher in SVN
infant_taxa_12	Unknown_CAG.451.9	infant_taxa_12__Unknown_CAG.451.9	Infant Fecal Microbiome (Taxa)	1-2 months	stool_microbiome_infant	0.000491294	0.000491294	0.0366684	-0.225635	0.298972	0.783383	Higher in SVN
infant_taxa_12	CAG.611.sp000434175	infant_taxa_12__CAG.611.sp000434175	Infant Fecal Microbiome (Taxa)	1-2 months	stool_microbiome_infant	0.000491294	0.000491294	0.0366684	-0.225635	0.298972	0.783383	Higher in SVN
infant_taxa_12	CAG.611.sp900552235	infant_taxa_12__CAG.611.sp900552235	Infant Fecal Microbiome (Taxa)	1-2 months	stool_microbiome_infant	0.000491294	0.000491294	0.0366684	-0.225635	0.298972	0.783383	Higher in SVN
infant_taxa_12	Unknown_CAG.611_1.1	infant_taxa_12__Unknown_CAG.611_1.1	Infant Fecal Microbiome (Taxa)	1-2 months	stool_microbiome_infant	0.000491294	0.000491294	0.0366684	-0.225635	0.298972	0.783383	Higher in SVN
infant_taxa_12	Unknown_CAG.611_1.2	infant_taxa_12__Unknown_CAG.611_1.2	Infant Fecal Microbiome (Taxa)	1-2 months	stool_microbiome_infant	0.000491294	0.000491294	0.0366684	-0.225635	0.298972	0.783383	Higher in SVN
infant_taxa_12	Unknown_CAG.710	infant_taxa_12__Unknown_CAG.710	Infant Fecal Microbiome (Taxa)	1-2 months	stool_microbiome_infant	0.000491294	0.000491294	0.0366684	-0.225635	0.298972	0.783383	Higher in SVN
infant_taxa_12	Unknown_CAG.710.1	infant_taxa_12__Unknown_CAG.710.1	Infant Fecal Microbiome (Taxa)	1-2 months	stool_microbiome_infant	0.000491294	0.000491294	0.0366684	-0.225635	0.298972	0.783383	Higher in SVN
infant_taxa_12	Unknown_CAG.710.2	infant_taxa_12__Unknown_CAG.710.2	Infant Fecal Microbiome (Taxa)	1-2 months	stool_microbiome_infant	0.000491294	0.000491294	0.0366684	-0.225635	0.298972	0.783383	Higher in SVN
infant_taxa_12	Unknown_CAG.710.3	infant_taxa_12__Unknown_CAG.710.3	Infant Fecal Microbiome (Taxa)	1-2 months	stool_microbiome_infant	0.000491294	0.000491294	0.0366684	-0.225635	0.298972	0.783383	Higher in SVN
infant_taxa_12	Unknown_CAG.710.4	infant_taxa_12__Unknown_CAG.710.4	Infant Fecal Microbiome (Taxa)	1-2 months	stool_microbiome_infant	0.000491294	0.000491294	0.0366684	-0.225635	0.298972	0.783383	Higher in SVN
infant_taxa_12	Unknown_CAG.877.2	infant_taxa_12__Unknown_CAG.877.2	Infant Fecal Microbiome (Taxa)	1-2 months	stool_microbiome_infant	0.000491294	0.000491294	0.0366684	-0.225635	0.298972	0.783383	Higher in SVN
infant_taxa_12	Unknown_CAG.877.3	infant_taxa_12__Unknown_CAG.877.3	Infant Fecal Microbiome (Taxa)	1-2 months	stool_microbiome_infant	0.000491294	0.000491294	0.0366684	-0.225635	0.298972	0.783383	Higher in SVN
infant_taxa_12	Unknown_CAG.877.4	infant_taxa_12__Unknown_CAG.877.4	Infant Fecal Microbiome (Taxa)	1-2 months	stool_microbiome_infant	0.000491294	0.000491294	0.0366684	-0.225635	0.298972	0.783383	Higher in SVN
infant_taxa_12	Unknown_CAG.877.6	infant_taxa_12__Unknown_CAG.877.6	Infant Fecal Microbiome (Taxa)	1-2 months	stool_microbiome_infant	0.000491294	0.000491294	0.0366684	-0.225635	0.298972	0.783383	Higher in SVN
infant_taxa_12	Unknown_CAG.877.7	infant_taxa_12__Unknown_CAG.877.7	Infant Fecal Microbiome (Taxa)	1-2 months	stool_microbiome_infant	0.000491294	0.000491294	0.0366684	-0.225635	0.298972	0.783383	Higher in SVN
infant_taxa_12	Unknown_CAG.877.10	infant_taxa_12__Unknown_CAG.877.10	Infant Fecal Microbiome (Taxa)	1-2 months	stool_microbiome_infant	0.000491294	0.000491294	0.0366684	-0.225635	0.298972	0.783383	Higher in SVN
infant_taxa_12	Unknown_RUG591	infant_taxa_12__Unknown_RUG591	Infant Fecal Microbiome (Taxa)	1-2 months	stool_microbiome_infant	0.000491294	0.000491294	0.0366684	-0.225635	0.298972	0.783383	Higher in SVN
infant_taxa_12	Unknown_RUG591.1	infant_taxa_12__Unknown_RUG591.1	Infant Fecal Microbiome (Taxa)	1-2 months	stool_microbiome_infant	0.000491294	0.000491294	0.0366684	-0.225635	0.298972	0.783383	Higher in SVN
infant_taxa_12	Unknown_RUG591.2	infant_taxa_12__Unknown_RUG591.2	Infant Fecal Microbiome (Taxa)	1-2 months	stool_microbiome_infant	0.000491294	0.000491294	0.0366684	-0.225635	0.298972	0.783383	Higher in SVN
infant_taxa_12	Unknown_RUG591.3	infant_taxa_12__Unknown_RUG591.3	Infant Fecal Microbiome (Taxa)	1-2 months	stool_microbiome_infant	0.000491294	0.000491294	0.0366684	-0.225635	0.298972	0.783383	Higher in SVN
infant_taxa_12	Unknown_UBA3789.1	infant_taxa_12__Unknown_UBA3789.1	Infant Fecal Microbiome (Taxa)	1-2 months	stool_microbiome_infant	0.000491294	0.000491294	0.0366684	-0.225635	0.298972	0.783383	Higher in SVN
infant_taxa_12	UBA7057.sp900542735	infant_taxa_12__UBA7057.sp900542735	Infant Fecal Microbiome (Taxa)	1-2 months	stool_microbiome_infant	0.000491294	0.000491294	0.0366684	-0.225635	0.298972	0.783383	Higher in SVN
infant_taxa_12	Unknown_UBA7057	infant_taxa_12__Unknown_UBA7057	Infant Fecal Microbiome (Taxa)	1-2 months	stool_microbiome_infant	0.000491294	0.000491294	0.0366684	-0.225635	0.298972	0.783383	Higher in SVN
infant_taxa_12	Unknown_UBA7057.2	infant_taxa_12__Unknown_UBA7057.2	Infant Fecal Microbiome (Taxa)	1-2 months	stool_microbiome_infant	0.000491294	0.000491294	0.0366684	-0.225635	0.298972	0.783383	Higher in SVN
infant_taxa_12	Unknown_UBA7057.3	infant_taxa_12__Unknown_UBA7057.3	Infant Fecal Microbiome (Taxa)	1-2 months	stool_microbiome_infant	0.000491294	0.000491294	0.0366684	-0.225635	0.298972	0.783383	Higher in SVN
infant_taxa_12	Unknown_UMGS1449.1	infant_taxa_12__Unknown_UMGS1449.1	Infant Fecal Microbiome (Taxa)	1-2 months	stool_microbiome_infant	0.000491294	0.000491294	0.0366684	-0.225635	0.298972	0.783383	Higher in SVN
infant_taxa_12	Unknown_UMGS1449.2	infant_taxa_12__Unknown_UMGS1449.2	Infant Fecal Microbiome (Taxa)	1-2 months	stool_microbiome_infant	0.000491294	0.000491294	0.0366684	-0.225635	0.298972	0.783383	Higher in SVN
infant_taxa_12	Unknown_UMGS1449.3	infant_taxa_12__Unknown_UMGS1449.3	Infant Fecal Microbiome (Taxa)	1-2 months	stool_microbiome_infant	0.000491294	0.000491294	0.0366684	-0.225635	0.298972	0.783383	Higher in SVN
infant_taxa_12	Unknown_UMGS1449.4	infant_taxa_12__Unknown_UMGS1449.4	Infant Fecal Microbiome (Taxa)	1-2 months	stool_microbiome_infant	0.000491294	0.000491294	0.0366684	-0.225635	0.298972	0.783383	Higher in SVN
infant_taxa_12	Unknown_UMGS1449.5	infant_taxa_12__Unknown_UMGS1449.5	Infant Fecal Microbiome (Taxa)	1-2 months	stool_microbiome_infant	0.000491294	0.000491294	0.0366684	-0.225635	0.298972	0.783383	Higher in SVN
infant_taxa_12	UMGS995.sp900547465	infant_taxa_12__UMGS995.sp900547465	Infant Fecal Microbiome (Taxa)	1-2 months	stool_microbiome_infant	0.000491294	0.000491294	0.0366684	-0.225635	0.298972	0.783383	Higher in SVN
infant_taxa_12	Unknown_UMGS995	infant_taxa_12__Unknown_UMGS995	Infant Fecal Microbiome (Taxa)	1-2 months	stool_microbiome_infant	0.000491294	0.000491294	0.0366684	-0.225635	0.298972	0.783383	Higher in SVN
infant_taxa_12	Unknown_UMGS995.1	infant_taxa_12__Unknown_UMGS995.1	Infant Fecal Microbiome (Taxa)	1-2 months	stool_microbiome_infant	0.000491294	0.000491294	0.0366684	-0.225635	0.298972	0.783383	Higher in SVN
infant_taxa_12	Unknown_UMGS995.3	infant_taxa_12__Unknown_UMGS995.3	Infant Fecal Microbiome (Taxa)	1-2 months	stool_microbiome_infant	0.000491294	0.000491294	0.0366684	-0.225635	0.298972	0.783383	Higher in SVN
infant_taxa_12	Unknown_CAG.611_2	infant_taxa_12__Unknown_CAG.611_2	Infant Fecal Microbiome (Taxa)	1-2 months	stool_microbiome_infant	0.000491294	0.000491294	0.0366684	-0.225635	0.298972	0.783383	Higher in SVN
infant_taxa_12	Unknown_CAG.822_1.2	infant_taxa_12__Unknown_CAG.822_1.2	Infant Fecal Microbiome (Taxa)	1-2 months	stool_microbiome_infant	0.000491294	0.000491294	0.0366684	-0.225635	0.298972	0.783383	Higher in SVN
infant_taxa_12	CAG.878.sp000432255	infant_taxa_12__CAG.878.sp000432255	Infant Fecal Microbiome (Taxa)	1-2 months	stool_microbiome_infant	0.000491294	0.000491294	0.0366684	-0.225635	0.298972	0.783383	Higher in SVN
infant_taxa_12	Unknown_CAG.878	infant_taxa_12__Unknown_CAG.878	Infant Fecal Microbiome (Taxa)	1-2 months	stool_microbiome_infant	0.000491294	0.000491294	0.0366684	-0.225635	0.298972	0.783383	Higher in SVN
infant_taxa_12	CAG.884.sp000433875	infant_taxa_12__CAG.884.sp000433875	Infant Fecal Microbiome (Taxa)	1-2 months	stool_microbiome_infant	0.000491294	0.000491294	0.0366684	-0.225635	0.298972	0.783383	Higher in SVN
infant_taxa_12	Unknown_CAG.884	infant_taxa_12__Unknown_CAG.884	Infant Fecal Microbiome (Taxa)	1-2 months	stool_microbiome_infant	0.000491294	0.000491294	0.0366684	-0.225635	0.298972	0.783383	Higher in SVN
infant_taxa_12	Unknown_CAG.884.4	infant_taxa_12__Unknown_CAG.884.4	Infant Fecal Microbiome (Taxa)	1-2 months	stool_microbiome_infant	0.000491294	0.000491294	0.0366684	-0.225635	0.298972	0.783383	Higher in SVN
infant_taxa_12	Unknown_CAG.884.5	infant_taxa_12__Unknown_CAG.884.5	Infant Fecal Microbiome (Taxa)	1-2 months	stool_microbiome_infant	0.000491294	0.000491294	0.0366684	-0.225635	0.298972	0.783383	Higher in SVN
infant_taxa_12	UBA3631.sp900544605	infant_taxa_12__UBA3631.sp900544605	Infant Fecal Microbiome (Taxa)	1-2 months	stool_microbiome_infant	0.000491294	0.000491294	0.0366684	-0.225635	0.298972	0.783383	Higher in SVN
infant_taxa_12	Unknown_UBA3631	infant_taxa_12__Unknown_UBA3631	Infant Fecal Microbiome (Taxa)	1-2 months	stool_microbiome_infant	0.000491294	0.000491294	0.0366684	-0.225635	0.298972	0.783383	Higher in SVN
infant_taxa_12	Unknown_UBA3631.1	infant_taxa_12__Unknown_UBA3631.1	Infant Fecal Microbiome (Taxa)	1-2 months	stool_microbiome_infant	0.000491294	0.000491294	0.0366684	-0.225635	0.298972	0.783383	Higher in SVN
infant_taxa_12	UBA5026.sp900550255	infant_taxa_12__UBA5026.sp900550255	Infant Fecal Microbiome (Taxa)	1-2 months	stool_microbiome_infant	0.000491294	0.000491294	0.0366684	-0.225635	0.298972	0.783383	Higher in SVN
infant_taxa_12	UBA5026.sp900552335	infant_taxa_12__UBA5026.sp900552335	Infant Fecal Microbiome (Taxa)	1-2 months	stool_microbiome_infant	0.000491294	0.000491294	0.0366684	-0.225635	0.298972	0.783383	Higher in SVN
infant_taxa_12	UBA5026.sp900557305	infant_taxa_12__UBA5026.sp900557305	Infant Fecal Microbiome (Taxa)	1-2 months	stool_microbiome_infant	0.000491294	0.000491294	0.0366684	-0.225635	0.298972	0.783383	Higher in SVN
infant_taxa_12	Unknown_UBA5026	infant_taxa_12__Unknown_UBA5026	Infant Fecal Microbiome (Taxa)	1-2 months	stool_microbiome_infant	0.000491294	0.000491294	0.0366684	-0.225635	0.298972	0.783383	Higher in SVN
infant_taxa_12	Unknown_UBA5026.1	infant_taxa_12__Unknown_UBA5026.1	Infant Fecal Microbiome (Taxa)	1-2 months	stool_microbiome_infant	0.000491294	0.000491294	0.0366684	-0.225635	0.298972	0.783383	Higher in SVN
infant_taxa_12	Unknown_UBA5026.5	infant_taxa_12__Unknown_UBA5026.5	Infant Fecal Microbiome (Taxa)	1-2 months	stool_microbiome_infant	0.000491294	0.000491294	0.0366684	-0.225635	0.298972	0.783383	Higher in SVN
infant_taxa_12	Unknown_UBA5026.6	infant_taxa_12__Unknown_UBA5026.6	Infant Fecal Microbiome (Taxa)	1-2 months	stool_microbiome_infant	0.000491294	0.000491294	0.0366684	-0.225635	0.298972	0.783383	Higher in SVN
infant_taxa_12	Unknown_UBA5026.7	infant_taxa_12__Unknown_UBA5026.7	Infant Fecal Microbiome (Taxa)	1-2 months	stool_microbiome_infant	0.000491294	0.000491294	0.0366684	-0.225635	0.298972	0.783383	Higher in SVN
infant_taxa_12	Unknown_UBA5026.9	infant_taxa_12__Unknown_UBA5026.9	Infant Fecal Microbiome (Taxa)	1-2 months	stool_microbiome_infant	0.000491294	0.000491294	0.0366684	-0.225635	0.298972	0.783383	Higher in SVN
infant_taxa_12	Unknown_UBA5026.10	infant_taxa_12__Unknown_UBA5026.10	Infant Fecal Microbiome (Taxa)	1-2 months	stool_microbiome_infant	0.000491294	0.000491294	0.0366684	-0.225635	0.298972	0.783383	Higher in SVN
infant_taxa_12	UBA5578.sp900553395	infant_taxa_12__UBA5578.sp900553395	Infant Fecal Microbiome (Taxa)	1-2 months	stool_microbiome_infant	0.000491294	0.000491294	0.0366684	-0.225635	0.298972	0.783383	Higher in SVN
infant_taxa_12	Unknown_UBA5578	infant_taxa_12__Unknown_UBA5578	Infant Fecal Microbiome (Taxa)	1-2 months	stool_microbiome_infant	0.000491294	0.000491294	0.0366684	-0.225635	0.298972	0.783383	Higher in SVN
infant_taxa_12	Unknown_UBA5578.1	infant_taxa_12__Unknown_UBA5578.1	Infant Fecal Microbiome (Taxa)	1-2 months	stool_microbiome_infant	0.000491294	0.000491294	0.0366684	-0.225635	0.298972	0.783383	Higher in SVN
infant_taxa_12	Unknown_UBA5578.2	infant_taxa_12__Unknown_UBA5578.2	Infant Fecal Microbiome (Taxa)	1-2 months	stool_microbiome_infant	0.000491294	0.000491294	0.0366684	-0.225635	0.298972	0.783383	Higher in SVN
infant_taxa_12	Unknown_UBA5578.3	infant_taxa_12__Unknown_UBA5578.3	Infant Fecal Microbiome (Taxa)	1-2 months	stool_microbiome_infant	0.000491294	0.000491294	0.0366684	-0.225635	0.298972	0.783383	Higher in SVN
infant_taxa_12	Unknown_UMGS1045.2	infant_taxa_12__Unknown_UMGS1045.2	Infant Fecal Microbiome (Taxa)	1-2 months	stool_microbiome_infant	0.000491294	0.000491294	0.0366684	-0.225635	0.298972	0.783383	Higher in SVN
infant_taxa_12	Unknown_UMGS1045.3	infant_taxa_12__Unknown_UMGS1045.3	Infant Fecal Microbiome (Taxa)	1-2 months	stool_microbiome_infant	0.000491294	0.000491294	0.0366684	-0.225635	0.298972	0.783383	Higher in SVN
infant_taxa_12	Unknown_CAG.822_2	infant_taxa_12__Unknown_CAG.822_2	Infant Fecal Microbiome (Taxa)	1-2 months	stool_microbiome_infant	0.000491294	0.000491294	0.0366684	-0.225635	0.298972	0.783383	Higher in SVN
infant_taxa_12	CAG.1193.sp900550145	infant_taxa_12__CAG.1193.sp900550145	Infant Fecal Microbiome (Taxa)	1-2 months	stool_microbiome_infant	0.000491294	0.000491294	0.0366684	-0.225635	0.298972	0.783383	Higher in SVN
infant_taxa_12	Unknown_CAG.1193	infant_taxa_12__Unknown_CAG.1193	Infant Fecal Microbiome (Taxa)	1-2 months	stool_microbiome_infant	0.000491294	0.000491294	0.0366684	-0.225635	0.298972	0.783383	Higher in SVN
infant_taxa_12	CAG.568.sp000434395	infant_taxa_12__CAG.568.sp000434395	Infant Fecal Microbiome (Taxa)	1-2 months	stool_microbiome_infant	0.000491294	0.000491294	-0.0807974	-0.342965	0.18137	0.54457	Lower in SVN
infant_taxa_12	UBA7642.sp900549915	infant_taxa_12__UBA7642.sp900549915	Infant Fecal Microbiome (Taxa)	1-2 months	stool_microbiome_infant	0.000491294	0.000491294	0.0366684	-0.225635	0.298972	0.783383	Higher in SVN
infant_taxa_12	Unknown_UBA7642	infant_taxa_12__Unknown_UBA7642	Infant Fecal Microbiome (Taxa)	1-2 months	stool_microbiome_infant	0.000491294	0.000491294	0.0366684	-0.225635	0.298972	0.783383	Higher in SVN
infant_taxa_12	Unknown_UBA7642.1	infant_taxa_12__Unknown_UBA7642.1	Infant Fecal Microbiome (Taxa)	1-2 months	stool_microbiome_infant	0.000491294	0.000491294	0.0366684	-0.225635	0.298972	0.783383	Higher in SVN
infant_taxa_12	Unknown_UBA7642.2	infant_taxa_12__Unknown_UBA7642.2	Infant Fecal Microbiome (Taxa)	1-2 months	stool_microbiome_infant	0.000491294	0.000491294	0.0366684	-0.225635	0.298972	0.783383	Higher in SVN
infant_taxa_12	Unknown_CAG.631.1	infant_taxa_12__Unknown_CAG.631.1	Infant Fecal Microbiome (Taxa)	1-2 months	stool_microbiome_infant	0.000491294	0.000491294	0.0366684	-0.225635	0.298972	0.783383	Higher in SVN
infant_taxa_12	Unknown_CAG.631.2	infant_taxa_12__Unknown_CAG.631.2	Infant Fecal Microbiome (Taxa)	1-2 months	stool_microbiome_infant	0.000491294	0.000491294	0.0366684	-0.225635	0.298972	0.783383	Higher in SVN
infant_taxa_12	CAG.826.sp000437235	infant_taxa_12__CAG.826.sp000437235	Infant Fecal Microbiome (Taxa)	1-2 months	stool_microbiome_infant	0.000491294	0.000491294	0.0366684	-0.225635	0.298972	0.783383	Higher in SVN
infant_taxa_12	RUG131.sp900549975	infant_taxa_12__RUG131.sp900549975	Infant Fecal Microbiome (Taxa)	1-2 months	stool_microbiome_infant	0.000491294	0.000491294	0.0366684	-0.225635	0.298972	0.783383	Higher in SVN
infant_taxa_12	Unknown_RUG131	infant_taxa_12__Unknown_RUG131	Infant Fecal Microbiome (Taxa)	1-2 months	stool_microbiome_infant	0.000491294	0.000491294	0.0366684	-0.225635	0.298972	0.783383	Higher in SVN
infant_taxa_12	UBA4855.sp900545015	infant_taxa_12__UBA4855.sp900545015	Infant Fecal Microbiome (Taxa)	1-2 months	stool_microbiome_infant	0.000491294	0.000491294	0.0366684	-0.225635	0.298972	0.783383	Higher in SVN
infant_taxa_12	Unknown_UBA4855	infant_taxa_12__Unknown_UBA4855	Infant Fecal Microbiome (Taxa)	1-2 months	stool_microbiome_infant	0.000491294	0.000491294	0.0366684	-0.225635	0.298972	0.783383	Higher in SVN
infant_taxa_12	UBA4951.sp900540385	infant_taxa_12__UBA4951.sp900540385	Infant Fecal Microbiome (Taxa)	1-2 months	stool_microbiome_infant	0.000491294	0.000491294	0.0366684	-0.225635	0.298972	0.783383	Higher in SVN
infant_taxa_12	UBA733.sp900539595	infant_taxa_12__UBA733.sp900539595	Infant Fecal Microbiome (Taxa)	1-2 months	stool_microbiome_infant	0.000491294	0.000491294	0.0366684	-0.225635	0.298972	0.783383	Higher in SVN
infant_taxa_12	UBA733.sp900550795	infant_taxa_12__UBA733.sp900550795	Infant Fecal Microbiome (Taxa)	1-2 months	stool_microbiome_infant	0.000491294	0.000491294	0.0366684	-0.225635	0.298972	0.783383	Higher in SVN
infant_taxa_12	Gemella.morbillorum	infant_taxa_12__Gemella.morbillorum	Infant Fecal Microbiome (Taxa)	1-2 months	stool_microbiome_infant	0.000491294	0.000491294	0.0366684	-0.225635	0.298972	0.783383	Higher in SVN
infant_taxa_12	Unknown_Gemella	infant_taxa_12__Unknown_Gemella	Infant Fecal Microbiome (Taxa)	1-2 months	stool_microbiome_infant	0.000491294	0.000491294	0.216637	-0.044466	0.47774	0.103544	Higher in SVN
infant_taxa_12	Staphylococcus.aureus	infant_taxa_12__Staphylococcus.aureus	Infant Fecal Microbiome (Taxa)	1-2 months	stool_microbiome_infant	0.000491294	0.000491294	0.306442	0.0465825	0.566301	0.0209858	Higher in SVN
infant_taxa_12	Clostridium.celatum	infant_taxa_12__Clostridium.celatum	Infant Fecal Microbiome (Taxa)	1-2 months	stool_microbiome_infant	0.000491294	0.000491294	0.0366684	-0.225635	0.298972	0.783383	Higher in SVN
infant_taxa_12	Clostridium.saudiense	infant_taxa_12__Clostridium.saudiense	Infant Fecal Microbiome (Taxa)	1-2 months	stool_microbiome_infant	0.000491294	0.000491294	0.0366684	-0.225635	0.298972	0.783383	Higher in SVN
infant_taxa_12	Clostridium.sp900539375	infant_taxa_12__Clostridium.sp900539375	Infant Fecal Microbiome (Taxa)	1-2 months	stool_microbiome_infant	0.000491294	0.000491294	0.0366684	-0.225635	0.298972	0.783383	Higher in SVN
infant_taxa_12	Clostridium.sp900540255	infant_taxa_12__Clostridium.sp900540255	Infant Fecal Microbiome (Taxa)	1-2 months	stool_microbiome_infant	0.000491294	0.000491294	0.0366684	-0.225635	0.298972	0.783383	Higher in SVN
infant_taxa_12	Clostridium.tertium	infant_taxa_12__Clostridium.tertium	Infant Fecal Microbiome (Taxa)	1-2 months	stool_microbiome_infant	0.000491294	0.000491294	0.0366684	-0.225635	0.298972	0.783383	Higher in SVN
infant_taxa_12	Unknown_Clostridium	infant_taxa_12__Unknown_Clostridium	Infant Fecal Microbiome (Taxa)	1-2 months	stool_microbiome_infant	0.000491294	0.000491294	0.0366684	-0.225635	0.298972	0.783383	Higher in SVN
infant_taxa_12	Unknown_Clostridium.1	infant_taxa_12__Unknown_Clostridium.1	Infant Fecal Microbiome (Taxa)	1-2 months	stool_microbiome_infant	0.000491294	0.000491294	0.0366684	-0.225635	0.298972	0.783383	Higher in SVN
infant_taxa_12	Anaerotignum.sp000436415	infant_taxa_12__Anaerotignum.sp000436415	Infant Fecal Microbiome (Taxa)	1-2 months	stool_microbiome_infant	0.000491294	0.000491294	0.0366684	-0.225635	0.298972	0.783383	Higher in SVN
infant_taxa_12	Unknown_Anaerotignum	infant_taxa_12__Unknown_Anaerotignum	Infant Fecal Microbiome (Taxa)	1-2 months	stool_microbiome_infant	0.000491294	0.000491294	0.0366684	-0.225635	0.298972	0.783383	Higher in SVN
infant_taxa_12	Unknown_UBA8514	infant_taxa_12__Unknown_UBA8514	Infant Fecal Microbiome (Taxa)	1-2 months	stool_microbiome_infant	0.000491294	0.000491294	0.0366684	-0.225635	0.298972	0.783383	Higher in SVN
infant_taxa_12	CAG.274.sp900545305	infant_taxa_12__CAG.274.sp900545305	Infant Fecal Microbiome (Taxa)	1-2 months	stool_microbiome_infant	0.000491294	0.000491294	0.0366684	-0.225635	0.298972	0.783383	Higher in SVN
infant_taxa_12	Niameybacter.sp900549765	infant_taxa_12__Niameybacter.sp900549765	Infant Fecal Microbiome (Taxa)	1-2 months	stool_microbiome_infant	0.000491294	0.000491294	0.0366684	-0.225635	0.298972	0.783383	Higher in SVN
infant_taxa_12	AM51.8.sp003478275	infant_taxa_12__AM51.8.sp003478275	Infant Fecal Microbiome (Taxa)	1-2 months	stool_microbiome_infant	0.000491294	0.000491294	0.0366684	-0.225635	0.298972	0.783383	Higher in SVN
infant_taxa_12	AM51.8.sp900546435	infant_taxa_12__AM51.8.sp900546435	Infant Fecal Microbiome (Taxa)	1-2 months	stool_microbiome_infant	0.000491294	0.000491294	0.0366684	-0.225635	0.298972	0.783383	Higher in SVN
infant_taxa_12	Unknown_AM51.8	infant_taxa_12__Unknown_AM51.8	Infant Fecal Microbiome (Taxa)	1-2 months	stool_microbiome_infant	0.000491294	0.000491294	0.0366684	-0.225635	0.298972	0.783383	Higher in SVN
infant_taxa_12	Unknown_AM51.8.1	infant_taxa_12__Unknown_AM51.8.1	Infant Fecal Microbiome (Taxa)	1-2 months	stool_microbiome_infant	0.000491294	0.000491294	0.0366684	-0.225635	0.298972	0.783383	Higher in SVN
infant_taxa_12	Acetatifactor.sp003447295	infant_taxa_12__Acetatifactor.sp003447295	Infant Fecal Microbiome (Taxa)	1-2 months	stool_microbiome_infant	0.000491294	0.000491294	0.0366684	-0.225635	0.298972	0.783383	Higher in SVN
infant_taxa_12	Unknown_Acetatifactor	infant_taxa_12__Unknown_Acetatifactor	Infant Fecal Microbiome (Taxa)	1-2 months	stool_microbiome_infant	0.000491294	0.000491294	0.0366684	-0.225635	0.298972	0.783383	Higher in SVN
infant_taxa_12	Unknown_Acetatifactor.1	infant_taxa_12__Unknown_Acetatifactor.1	Infant Fecal Microbiome (Taxa)	1-2 months	stool_microbiome_infant	0.000491294	0.000491294	0.0366684	-0.225635	0.298972	0.783383	Higher in SVN
infant_taxa_12	Unknown_Acetatifactor.2	infant_taxa_12__Unknown_Acetatifactor.2	Infant Fecal Microbiome (Taxa)	1-2 months	stool_microbiome_infant	0.000491294	0.000491294	0.0366684	-0.225635	0.298972	0.783383	Higher in SVN
infant_taxa_12	Unknown_Acetatifactor.4	infant_taxa_12__Unknown_Acetatifactor.4	Infant Fecal Microbiome (Taxa)	1-2 months	stool_microbiome_infant	0.000491294	0.000491294	0.0366684	-0.225635	0.298972	0.783383	Higher in SVN
infant_taxa_12	Unknown_Acetatifactor.5	infant_taxa_12__Unknown_Acetatifactor.5	Infant Fecal Microbiome (Taxa)	1-2 months	stool_microbiome_infant	0.000491294	0.000491294	0.0366684	-0.225635	0.298972	0.783383	Higher in SVN
infant_taxa_12	Unknown_Acetatifactor.8	infant_taxa_12__Unknown_Acetatifactor.8	Infant Fecal Microbiome (Taxa)	1-2 months	stool_microbiome_infant	0.000491294	0.000491294	0.0366684	-0.225635	0.298972	0.783383	Higher in SVN
infant_taxa_12	Unknown_Acetatifactor.9	infant_taxa_12__Unknown_Acetatifactor.9	Infant Fecal Microbiome (Taxa)	1-2 months	stool_microbiome_infant	0.000491294	0.000491294	0.0366684	-0.225635	0.298972	0.783383	Higher in SVN
infant_taxa_12	Unknown_Acetatifactor.10	infant_taxa_12__Unknown_Acetatifactor.10	Infant Fecal Microbiome (Taxa)	1-2 months	stool_microbiome_infant	0.000491294	0.000491294	0.0366684	-0.225635	0.298972	0.783383	Higher in SVN
infant_taxa_12	Agathobacter.faecis	infant_taxa_12__Agathobacter.faecis	Infant Fecal Microbiome (Taxa)	1-2 months	stool_microbiome_infant	0.000491294	0.000491294	0.0366684	-0.225635	0.298972	0.783383	Higher in SVN
infant_taxa_12	Agathobacter.rectalis	infant_taxa_12__Agathobacter.rectalis	Infant Fecal Microbiome (Taxa)	1-2 months	stool_microbiome_infant	0.000491294	0.000491294	0.0366684	-0.225635	0.298972	0.783383	Higher in SVN
infant_taxa_12	Agathobacter.sp900546625	infant_taxa_12__Agathobacter.sp900546625	Infant Fecal Microbiome (Taxa)	1-2 months	stool_microbiome_infant	0.000491294	0.000491294	0.0366684	-0.225635	0.298972	0.783383	Higher in SVN
infant_taxa_12	Agathobacter.sp900547695	infant_taxa_12__Agathobacter.sp900547695	Infant Fecal Microbiome (Taxa)	1-2 months	stool_microbiome_infant	0.000491294	0.000491294	0.0366684	-0.225635	0.298972	0.783383	Higher in SVN
infant_taxa_12	Agathobacter.sp900548765	infant_taxa_12__Agathobacter.sp900548765	Infant Fecal Microbiome (Taxa)	1-2 months	stool_microbiome_infant	0.000491294	0.000491294	0.0366684	-0.225635	0.298972	0.783383	Higher in SVN
infant_taxa_12	Agathobacter.sp900550545	infant_taxa_12__Agathobacter.sp900550545	Infant Fecal Microbiome (Taxa)	1-2 months	stool_microbiome_infant	0.000491294	0.000491294	0.0366684	-0.225635	0.298972	0.783383	Higher in SVN
infant_taxa_12	Agathobacter.sp900552085	infant_taxa_12__Agathobacter.sp900552085	Infant Fecal Microbiome (Taxa)	1-2 months	stool_microbiome_infant	0.000491294	0.000491294	0.0366684	-0.225635	0.298972	0.783383	Higher in SVN
infant_taxa_12	Unknown_Agathobacter.2	infant_taxa_12__Unknown_Agathobacter.2	Infant Fecal Microbiome (Taxa)	1-2 months	stool_microbiome_infant	0.000491294	0.000491294	0.0366684	-0.225635	0.298972	0.783383	Higher in SVN
infant_taxa_12	Unknown_Agathobacter.3	infant_taxa_12__Unknown_Agathobacter.3	Infant Fecal Microbiome (Taxa)	1-2 months	stool_microbiome_infant	0.000491294	0.000491294	0.0366684	-0.225635	0.298972	0.783383	Higher in SVN
infant_taxa_12	Unknown_Agathobacter.4	infant_taxa_12__Unknown_Agathobacter.4	Infant Fecal Microbiome (Taxa)	1-2 months	stool_microbiome_infant	0.000491294	0.000491294	0.0366684	-0.225635	0.298972	0.783383	Higher in SVN
infant_taxa_12	Anaerobutyricum.hallii	infant_taxa_12__Anaerobutyricum.hallii	Infant Fecal Microbiome (Taxa)	1-2 months	stool_microbiome_infant	0.000491294	0.000491294	0.0366684	-0.225635	0.298972	0.783383	Higher in SVN
infant_taxa_12	Anaerobutyricum.hallii_A	infant_taxa_12__Anaerobutyricum.hallii_A	Infant Fecal Microbiome (Taxa)	1-2 months	stool_microbiome_infant	0.000491294	0.000491294	0.0366684	-0.225635	0.298972	0.783383	Higher in SVN
infant_taxa_12	Bacteroides_F.pectinophilus	infant_taxa_12__Bacteroides_F.pectinophilus	Infant Fecal Microbiome (Taxa)	1-2 months	stool_microbiome_infant	0.000491294	0.000491294	0.0366684	-0.225635	0.298972	0.783383	Higher in SVN
infant_taxa_12	Bariatricus.comes	infant_taxa_12__Bariatricus.comes	Infant Fecal Microbiome (Taxa)	1-2 months	stool_microbiome_infant	0.000491294	0.000491294	0.0366684	-0.225635	0.298972	0.783383	Higher in SVN
infant_taxa_12	Unknown_Bariatricus	infant_taxa_12__Unknown_Bariatricus	Infant Fecal Microbiome (Taxa)	1-2 months	stool_microbiome_infant	0.000491294	0.000491294	0.0366684	-0.225635	0.298972	0.783383	Higher in SVN
infant_taxa_12	Unknown_Bariatricus.2	infant_taxa_12__Unknown_Bariatricus.2	Infant Fecal Microbiome (Taxa)	1-2 months	stool_microbiome_infant	0.000491294	0.000491294	0.0366684	-0.225635	0.298972	0.783383	Higher in SVN
infant_taxa_12	Blautia.sp000436935	infant_taxa_12__Blautia.sp000436935	Infant Fecal Microbiome (Taxa)	1-2 months	stool_microbiome_infant	0.000491294	0.000491294	0.0366684	-0.225635	0.298972	0.783383	Higher in SVN
infant_taxa_12	Blautia_A.sp000436615	infant_taxa_12__Blautia_A.sp000436615	Infant Fecal Microbiome (Taxa)	1-2 months	stool_microbiome_infant	0.000491294	0.000491294	0.0366684	-0.225635	0.298972	0.783383	Higher in SVN
infant_taxa_12	Blautia_A.sp003471165	infant_taxa_12__Blautia_A.sp003471165	Infant Fecal Microbiome (Taxa)	1-2 months	stool_microbiome_infant	0.000491294	0.000491294	0.0366684	-0.225635	0.298972	0.783383	Higher in SVN
infant_taxa_12	Blautia_A.sp003474435	infant_taxa_12__Blautia_A.sp003474435	Infant Fecal Microbiome (Taxa)	1-2 months	stool_microbiome_infant	0.000491294	0.000491294	0.0366684	-0.225635	0.298972	0.783383	Higher in SVN
infant_taxa_12	Blautia_A.sp003477525	infant_taxa_12__Blautia_A.sp003477525	Infant Fecal Microbiome (Taxa)	1-2 months	stool_microbiome_infant	0.000491294	0.000491294	0.0366684	-0.225635	0.298972	0.783383	Higher in SVN
infant_taxa_12	Blautia_A.sp900066145	infant_taxa_12__Blautia_A.sp900066145	Infant Fecal Microbiome (Taxa)	1-2 months	stool_microbiome_infant	0.000491294	0.000491294	0.0366684	-0.225635	0.298972	0.783383	Higher in SVN
infant_taxa_12	Blautia_A.sp900066505	infant_taxa_12__Blautia_A.sp900066505	Infant Fecal Microbiome (Taxa)	1-2 months	stool_microbiome_infant	0.000491294	0.000491294	0.0366684	-0.225635	0.298972	0.783383	Higher in SVN
infant_taxa_12	Blautia_A.sp900120195	infant_taxa_12__Blautia_A.sp900120195	Infant Fecal Microbiome (Taxa)	1-2 months	stool_microbiome_infant	0.000491294	0.000491294	0.0366684	-0.225635	0.298972	0.783383	Higher in SVN
infant_taxa_12	Blautia_A.sp900548245	infant_taxa_12__Blautia_A.sp900548245	Infant Fecal Microbiome (Taxa)	1-2 months	stool_microbiome_infant	0.000491294	0.000491294	0.0366684	-0.225635	0.298972	0.783383	Higher in SVN
infant_taxa_12	Blautia_A.wexlerae	infant_taxa_12__Blautia_A.wexlerae	Infant Fecal Microbiome (Taxa)	1-2 months	stool_microbiome_infant	0.000491294	0.000491294	-0.080915	-0.343082	0.181252	0.543984	Lower in SVN
infant_taxa_12	Unknown_Blautia_A	infant_taxa_12__Unknown_Blautia_A	Infant Fecal Microbiome (Taxa)	1-2 months	stool_microbiome_infant	0.000491294	0.000491294	0.0366684	-0.225635	0.298972	0.783383	Higher in SVN
infant_taxa_12	Unknown_Blautia_A.3	infant_taxa_12__Unknown_Blautia_A.3	Infant Fecal Microbiome (Taxa)	1-2 months	stool_microbiome_infant	0.000491294	0.000491294	0.0366684	-0.225635	0.298972	0.783383	Higher in SVN
infant_taxa_12	Unknown_Blautia_A.4	infant_taxa_12__Unknown_Blautia_A.4	Infant Fecal Microbiome (Taxa)	1-2 months	stool_microbiome_infant	0.000491294	0.000491294	0.0366684	-0.225635	0.298972	0.783383	Higher in SVN
infant_taxa_12	Unknown_Blautia_A.5	infant_taxa_12__Unknown_Blautia_A.5	Infant Fecal Microbiome (Taxa)	1-2 months	stool_microbiome_infant	0.000491294	0.000491294	0.0366684	-0.225635	0.298972	0.783383	Higher in SVN
infant_taxa_12	Unknown_Blautia_A.6	infant_taxa_12__Unknown_Blautia_A.6	Infant Fecal Microbiome (Taxa)	1-2 months	stool_microbiome_infant	0.000491294	0.000491294	0.0366684	-0.225635	0.298972	0.783383	Higher in SVN
infant_taxa_12	Unknown_Blautia_A.7	infant_taxa_12__Unknown_Blautia_A.7	Infant Fecal Microbiome (Taxa)	1-2 months	stool_microbiome_infant	0.000491294	0.000491294	0.0366684	-0.225635	0.298972	0.783383	Higher in SVN
infant_taxa_12	Unknown_Blautia_A.11	infant_taxa_12__Unknown_Blautia_A.11	Infant Fecal Microbiome (Taxa)	1-2 months	stool_microbiome_infant	0.000491294	0.000491294	0.0366684	-0.225635	0.298972	0.783383	Higher in SVN
infant_taxa_12	Unknown_Blautia_A.12	infant_taxa_12__Unknown_Blautia_A.12	Infant Fecal Microbiome (Taxa)	1-2 months	stool_microbiome_infant	0.000491294	0.000491294	0.0366684	-0.225635	0.298972	0.783383	Higher in SVN
infant_taxa_12	Unknown_Blautia_A.13	infant_taxa_12__Unknown_Blautia_A.13	Infant Fecal Microbiome (Taxa)	1-2 months	stool_microbiome_infant	0.000491294	0.000491294	0.0366684	-0.225635	0.298972	0.783383	Higher in SVN
infant_taxa_12	Unknown_Blautia_A.15	infant_taxa_12__Unknown_Blautia_A.15	Infant Fecal Microbiome (Taxa)	1-2 months	stool_microbiome_infant	0.000491294	0.000491294	0.0366684	-0.225635	0.298972	0.783383	Higher in SVN
infant_taxa_12	Unknown_Blautia_A.16	infant_taxa_12__Unknown_Blautia_A.16	Infant Fecal Microbiome (Taxa)	1-2 months	stool_microbiome_infant	0.000491294	0.000491294	0.0366684	-0.225635	0.298972	0.783383	Higher in SVN
infant_taxa_12	Unknown_Blautia_A.19	infant_taxa_12__Unknown_Blautia_A.19	Infant Fecal Microbiome (Taxa)	1-2 months	stool_microbiome_infant	0.000491294	0.000491294	0.0366684	-0.225635	0.298972	0.783383	Higher in SVN
infant_taxa_12	Butyrivibrio_A.crossotus	infant_taxa_12__Butyrivibrio_A.crossotus	Infant Fecal Microbiome (Taxa)	1-2 months	stool_microbiome_infant	0.000491294	0.000491294	0.0366684	-0.225635	0.298972	0.783383	Higher in SVN
infant_taxa_12	Butyrivibrio_A.sp000431815	infant_taxa_12__Butyrivibrio_A.sp000431815	Infant Fecal Microbiome (Taxa)	1-2 months	stool_microbiome_infant	0.000491294	0.000491294	0.0366684	-0.225635	0.298972	0.783383	Higher in SVN
infant_taxa_12	CAG.127.sp900319515	infant_taxa_12__CAG.127.sp900319515	Infant Fecal Microbiome (Taxa)	1-2 months	stool_microbiome_infant	0.000491294	0.000491294	0.0366684	-0.225635	0.298972	0.783383	Higher in SVN
infant_taxa_12	CAG.127.sp900539705	infant_taxa_12__CAG.127.sp900539705	Infant Fecal Microbiome (Taxa)	1-2 months	stool_microbiome_infant	0.000491294	0.000491294	0.0366684	-0.225635	0.298972	0.783383	Higher in SVN
infant_taxa_12	Unknown_CAG.127.2	infant_taxa_12__Unknown_CAG.127.2	Infant Fecal Microbiome (Taxa)	1-2 months	stool_microbiome_infant	0.000491294	0.000491294	0.0366684	-0.225635	0.298972	0.783383	Higher in SVN
infant_taxa_12	CAG.194.sp000432915	infant_taxa_12__CAG.194.sp000432915	Infant Fecal Microbiome (Taxa)	1-2 months	stool_microbiome_infant	0.000491294	0.000491294	0.0366684	-0.225635	0.298972	0.783383	Higher in SVN
infant_taxa_12	CAG.303.sp000437755	infant_taxa_12__CAG.303.sp000437755	Infant Fecal Microbiome (Taxa)	1-2 months	stool_microbiome_infant	0.000491294	0.000491294	0.0366684	-0.225635	0.298972	0.783383	Higher in SVN
infant_taxa_12	CAG.45.sp000438375	infant_taxa_12__CAG.45.sp000438375	Infant Fecal Microbiome (Taxa)	1-2 months	stool_microbiome_infant	0.000491294	0.000491294	0.0366684	-0.225635	0.298972	0.783383	Higher in SVN
infant_taxa_12	CAG.45.sp900066395	infant_taxa_12__CAG.45.sp900066395	Infant Fecal Microbiome (Taxa)	1-2 months	stool_microbiome_infant	0.000491294	0.000491294	0.0366684	-0.225635	0.298972	0.783383	Higher in SVN
infant_taxa_12	CAG.510.sp900550475	infant_taxa_12__CAG.510.sp900550475	Infant Fecal Microbiome (Taxa)	1-2 months	stool_microbiome_infant	0.000491294	0.000491294	0.0366684	-0.225635	0.298972	0.783383	Higher in SVN
infant_taxa_12	CAG.590.sp000431135	infant_taxa_12__CAG.590.sp000431135	Infant Fecal Microbiome (Taxa)	1-2 months	stool_microbiome_infant	0.000491294	0.000491294	0.0366684	-0.225635	0.298972	0.783383	Higher in SVN
infant_taxa_12	CAG.590.sp900552885	infant_taxa_12__CAG.590.sp900552885	Infant Fecal Microbiome (Taxa)	1-2 months	stool_microbiome_infant	0.000491294	0.000491294	0.0366684	-0.225635	0.298972	0.783383	Higher in SVN
infant_taxa_12	Unknown_CAG.590	infant_taxa_12__Unknown_CAG.590	Infant Fecal Microbiome (Taxa)	1-2 months	stool_microbiome_infant	0.000491294	0.000491294	0.0366684	-0.225635	0.298972	0.783383	Higher in SVN
infant_taxa_12	Unknown_CAG.590.1	infant_taxa_12__Unknown_CAG.590.1	Infant Fecal Microbiome (Taxa)	1-2 months	stool_microbiome_infant	0.000491294	0.000491294	0.0366684	-0.225635	0.298972	0.783383	Higher in SVN
infant_taxa_12	CAG.632.sp002406015	infant_taxa_12__CAG.632.sp002406015	Infant Fecal Microbiome (Taxa)	1-2 months	stool_microbiome_infant	0.000491294	0.000491294	0.0366684	-0.225635	0.298972	0.783383	Higher in SVN
infant_taxa_12	CAG.632.sp900539185	infant_taxa_12__CAG.632.sp900539185	Infant Fecal Microbiome (Taxa)	1-2 months	stool_microbiome_infant	0.000491294	0.000491294	0.0366684	-0.225635	0.298972	0.783383	Higher in SVN
infant_taxa_12	Unknown_CAG.632	infant_taxa_12__Unknown_CAG.632	Infant Fecal Microbiome (Taxa)	1-2 months	stool_microbiome_infant	0.000491294	0.000491294	0.0366684	-0.225635	0.298972	0.783383	Higher in SVN
infant_taxa_12	CAG.81.sp900066055	infant_taxa_12__CAG.81.sp900066055	Infant Fecal Microbiome (Taxa)	1-2 months	stool_microbiome_infant	0.000491294	0.000491294	0.0366684	-0.225635	0.298972	0.783383	Higher in SVN
infant_taxa_12	CAG.81.sp900066535	infant_taxa_12__CAG.81.sp900066535	Infant Fecal Microbiome (Taxa)	1-2 months	stool_microbiome_infant	0.000491294	0.000491294	0.203876	-0.0573683	0.465121	0.12562	Higher in SVN
infant_taxa_12	Unknown_CAG.81	infant_taxa_12__Unknown_CAG.81	Infant Fecal Microbiome (Taxa)	1-2 months	stool_microbiome_infant	0.000491294	0.000491294	0.0366684	-0.225635	0.298972	0.783383	Higher in SVN
infant_taxa_12	Unknown_CAG.81.1	infant_taxa_12__Unknown_CAG.81.1	Infant Fecal Microbiome (Taxa)	1-2 months	stool_microbiome_infant	0.000491294	0.000491294	0.0366684	-0.225635	0.298972	0.783383	Higher in SVN
infant_taxa_12	CAG.882.sp000435595	infant_taxa_12__CAG.882.sp000435595	Infant Fecal Microbiome (Taxa)	1-2 months	stool_microbiome_infant	0.000491294	0.000491294	0.0366684	-0.225635	0.298972	0.783383	Higher in SVN
infant_taxa_12	CAG.882.sp003486385	infant_taxa_12__CAG.882.sp003486385	Infant Fecal Microbiome (Taxa)	1-2 months	stool_microbiome_infant	0.000491294	0.000491294	0.0366684	-0.225635	0.298972	0.783383	Higher in SVN
infant_taxa_12	CAG.882.sp900545175	infant_taxa_12__CAG.882.sp900545175	Infant Fecal Microbiome (Taxa)	1-2 months	stool_microbiome_infant	0.000491294	0.000491294	0.0366684	-0.225635	0.298972	0.783383	Higher in SVN
infant_taxa_12	CAG.95.sp000438155	infant_taxa_12__CAG.95.sp000438155	Infant Fecal Microbiome (Taxa)	1-2 months	stool_microbiome_infant	0.000491294	0.000491294	0.0366684	-0.225635	0.298972	0.783383	Higher in SVN
infant_taxa_12	CAG.95.sp900553305	infant_taxa_12__CAG.95.sp900553305	Infant Fecal Microbiome (Taxa)	1-2 months	stool_microbiome_infant	0.000491294	0.000491294	0.0366684	-0.225635	0.298972	0.783383	Higher in SVN
infant_taxa_12	Unknown_CAG.95	infant_taxa_12__Unknown_CAG.95	Infant Fecal Microbiome (Taxa)	1-2 months	stool_microbiome_infant	0.000491294	0.000491294	0.0366684	-0.225635	0.298972	0.783383	Higher in SVN
infant_taxa_12	Unknown_CAG.95.2	infant_taxa_12__Unknown_CAG.95.2	Infant Fecal Microbiome (Taxa)	1-2 months	stool_microbiome_infant	0.000491294	0.000491294	0.0366684	-0.225635	0.298972	0.783383	Higher in SVN
infant_taxa_12	COE1.sp001916965	infant_taxa_12__COE1.sp001916965	Infant Fecal Microbiome (Taxa)	1-2 months	stool_microbiome_infant	0.000491294	0.000491294	0.0366684	-0.225635	0.298972	0.783383	Higher in SVN
infant_taxa_12	Clostridium_Q.saccharolyticum_A	infant_taxa_12__Clostridium_Q.saccharolyticum_A	Infant Fecal Microbiome (Taxa)	1-2 months	stool_microbiome_infant	0.000491294	0.000491294	0.0366684	-0.225635	0.298972	0.783383	Higher in SVN
infant_taxa_12	Clostridium_Q.sp003024715	infant_taxa_12__Clostridium_Q.sp003024715	Infant Fecal Microbiome (Taxa)	1-2 months	stool_microbiome_infant	0.000491294	0.000491294	0.0366684	-0.225635	0.298972	0.783383	Higher in SVN
infant_taxa_12	Coprococcus.eutactus	infant_taxa_12__Coprococcus.eutactus	Infant Fecal Microbiome (Taxa)	1-2 months	stool_microbiome_infant	0.000491294	0.000491294	0.0366684	-0.225635	0.298972	0.783383	Higher in SVN
infant_taxa_12	Coprococcus.eutactus_A	infant_taxa_12__Coprococcus.eutactus_A	Infant Fecal Microbiome (Taxa)	1-2 months	stool_microbiome_infant	0.000491294	0.000491294	0.0366684	-0.225635	0.298972	0.783383	Higher in SVN
infant_taxa_12	Coprococcus.sp000154245	infant_taxa_12__Coprococcus.sp000154245	Infant Fecal Microbiome (Taxa)	1-2 months	stool_microbiome_infant	0.000491294	0.000491294	0.0366684	-0.225635	0.298972	0.783383	Higher in SVN
infant_taxa_12	Coprococcus.sp900548315	infant_taxa_12__Coprococcus.sp900548315	Infant Fecal Microbiome (Taxa)	1-2 months	stool_microbiome_infant	0.000491294	0.000491294	0.0366684	-0.225635	0.298972	0.783383	Higher in SVN
infant_taxa_12	Coprococcus.sp900557435	infant_taxa_12__Coprococcus.sp900557435	Infant Fecal Microbiome (Taxa)	1-2 months	stool_microbiome_infant	0.000491294	0.000491294	0.0366684	-0.225635	0.298972	0.783383	Higher in SVN
infant_taxa_12	Unknown_Coprococcus	infant_taxa_12__Unknown_Coprococcus	Infant Fecal Microbiome (Taxa)	1-2 months	stool_microbiome_infant	0.000491294	0.000491294	0.0366684	-0.225635	0.298972	0.783383	Higher in SVN
infant_taxa_12	Unknown_Coprococcus.2	infant_taxa_12__Unknown_Coprococcus.2	Infant Fecal Microbiome (Taxa)	1-2 months	stool_microbiome_infant	0.000491294	0.000491294	0.0366684	-0.225635	0.298972	0.783383	Higher in SVN
infant_taxa_12	Coprococcus_A.catus	infant_taxa_12__Coprococcus_A.catus	Infant Fecal Microbiome (Taxa)	1-2 months	stool_microbiome_infant	0.000491294	0.000491294	0.0366684	-0.225635	0.298972	0.783383	Higher in SVN
infant_taxa_12	Dorea.longicatena	infant_taxa_12__Dorea.longicatena	Infant Fecal Microbiome (Taxa)	1-2 months	stool_microbiome_infant	0.000491294	0.000491294	0.0366684	-0.225635	0.298972	0.783383	Higher in SVN
infant_taxa_12	Dorea.longicatena_B	infant_taxa_12__Dorea.longicatena_B	Infant Fecal Microbiome (Taxa)	1-2 months	stool_microbiome_infant	0.000491294	0.000491294	0.0366684	-0.225635	0.298972	0.783383	Higher in SVN
infant_taxa_12	Dorea.scindens	infant_taxa_12__Dorea.scindens	Infant Fecal Microbiome (Taxa)	1-2 months	stool_microbiome_infant	0.000491294	0.000491294	0.0366684	-0.225635	0.298972	0.783383	Higher in SVN
infant_taxa_12	Dorea.sp000433215	infant_taxa_12__Dorea.sp000433215	Infant Fecal Microbiome (Taxa)	1-2 months	stool_microbiome_infant	0.000491294	0.000491294	0.0366684	-0.225635	0.298972	0.783383	Higher in SVN
infant_taxa_12	Dorea.sp900066555	infant_taxa_12__Dorea.sp900066555	Infant Fecal Microbiome (Taxa)	1-2 months	stool_microbiome_infant	0.000491294	0.000491294	0.0366684	-0.225635	0.298972	0.783383	Higher in SVN
infant_taxa_12	Unknown_Dorea.2	infant_taxa_12__Unknown_Dorea.2	Infant Fecal Microbiome (Taxa)	1-2 months	stool_microbiome_infant	0.000491294	0.000491294	0.0366684	-0.225635	0.298972	0.783383	Higher in SVN
infant_taxa_12	Eisenbergiella.massiliensis	infant_taxa_12__Eisenbergiella.massiliensis	Infant Fecal Microbiome (Taxa)	1-2 months	stool_microbiome_infant	0.000491294	0.000491294	0.0366684	-0.225635	0.298972	0.783383	Higher in SVN
infant_taxa_12	Eisenbergiella.sp900066775	infant_taxa_12__Eisenbergiella.sp900066775	Infant Fecal Microbiome (Taxa)	1-2 months	stool_microbiome_infant	0.000491294	0.000491294	0.0366684	-0.225635	0.298972	0.783383	Higher in SVN
infant_taxa_12	Enterocloster.sp000431375	infant_taxa_12__Enterocloster.sp000431375	Infant Fecal Microbiome (Taxa)	1-2 months	stool_microbiome_infant	0.000491294	0.000491294	0.0366684	-0.225635	0.298972	0.783383	Higher in SVN
infant_taxa_12	Enterocloster.sp900538485	infant_taxa_12__Enterocloster.sp900538485	Infant Fecal Microbiome (Taxa)	1-2 months	stool_microbiome_infant	0.000491294	0.000491294	0.0366684	-0.225635	0.298972	0.783383	Higher in SVN
infant_taxa_12	Eubacterium_F.sp000433735	infant_taxa_12__Eubacterium_F.sp000433735	Infant Fecal Microbiome (Taxa)	1-2 months	stool_microbiome_infant	0.000491294	0.000491294	0.0366684	-0.225635	0.298972	0.783383	Higher in SVN
infant_taxa_12	Eubacterium_F.sp003491505	infant_taxa_12__Eubacterium_F.sp003491505	Infant Fecal Microbiome (Taxa)	1-2 months	stool_microbiome_infant	0.000491294	0.000491294	0.0366684	-0.225635	0.298972	0.783383	Higher in SVN
infant_taxa_12	Eubacterium_F.sp900539115	infant_taxa_12__Eubacterium_F.sp900539115	Infant Fecal Microbiome (Taxa)	1-2 months	stool_microbiome_infant	0.000491294	0.000491294	0.0366684	-0.225635	0.298972	0.783383	Higher in SVN
infant_taxa_12	Unknown_Eubacterium_F	infant_taxa_12__Unknown_Eubacterium_F	Infant Fecal Microbiome (Taxa)	1-2 months	stool_microbiome_infant	0.000491294	0.000491294	0.0366684	-0.225635	0.298972	0.783383	Higher in SVN
infant_taxa_12	Unknown_Eubacterium_F.1	infant_taxa_12__Unknown_Eubacterium_F.1	Infant Fecal Microbiome (Taxa)	1-2 months	stool_microbiome_infant	0.000491294	0.000491294	0.0366684	-0.225635	0.298972	0.783383	Higher in SVN
infant_taxa_12	Eubacterium_G.sp000432355	infant_taxa_12__Eubacterium_G.sp000432355	Infant Fecal Microbiome (Taxa)	1-2 months	stool_microbiome_infant	0.000491294	0.000491294	0.0366684	-0.225635	0.298972	0.783383	Higher in SVN
infant_taxa_12	Eubacterium_G.sp000434315	infant_taxa_12__Eubacterium_G.sp000434315	Infant Fecal Microbiome (Taxa)	1-2 months	stool_microbiome_infant	0.000491294	0.000491294	0.0366684	-0.225635	0.298972	0.783383	Higher in SVN
infant_taxa_12	Eubacterium_G.sp000435815	infant_taxa_12__Eubacterium_G.sp000435815	Infant Fecal Microbiome (Taxa)	1-2 months	stool_microbiome_infant	0.000491294	0.000491294	0.0366684	-0.225635	0.298972	0.783383	Higher in SVN
infant_taxa_12	Eubacterium_G.sp900550135	infant_taxa_12__Eubacterium_G.sp900550135	Infant Fecal Microbiome (Taxa)	1-2 months	stool_microbiome_infant	0.000491294	0.000491294	0.0366684	-0.225635	0.298972	0.783383	Higher in SVN
infant_taxa_12	Eubacterium_G.ventriosum	infant_taxa_12__Eubacterium_G.ventriosum	Infant Fecal Microbiome (Taxa)	1-2 months	stool_microbiome_infant	0.000491294	0.000491294	0.0366684	-0.225635	0.298972	0.783383	Higher in SVN
infant_taxa_12	Eubacterium_I.sp900546495	infant_taxa_12__Eubacterium_I.sp900546495	Infant Fecal Microbiome (Taxa)	1-2 months	stool_microbiome_infant	0.000491294	0.000491294	0.0366684	-0.225635	0.298972	0.783383	Higher in SVN
infant_taxa_12	Eubacterium_I.sp900557275	infant_taxa_12__Eubacterium_I.sp900557275	Infant Fecal Microbiome (Taxa)	1-2 months	stool_microbiome_infant	0.000491294	0.000491294	0.0366684	-0.225635	0.298972	0.783383	Higher in SVN
infant_taxa_12	Unknown_Eubacterium_J	infant_taxa_12__Unknown_Eubacterium_J	Infant Fecal Microbiome (Taxa)	1-2 months	stool_microbiome_infant	0.000491294	0.000491294	0.0366684	-0.225635	0.298972	0.783383	Higher in SVN
infant_taxa_12	Unknown_Eubacterium_J.1	infant_taxa_12__Unknown_Eubacterium_J.1	Infant Fecal Microbiome (Taxa)	1-2 months	stool_microbiome_infant	0.000491294	0.000491294	0.0366684	-0.225635	0.298972	0.783383	Higher in SVN
infant_taxa_12	Faecalimonas.nexilis	infant_taxa_12__Faecalimonas.nexilis	Infant Fecal Microbiome (Taxa)	1-2 months	stool_microbiome_infant	0.000491294	0.000491294	0.0366684	-0.225635	0.298972	0.783383	Higher in SVN
infant_taxa_12	GCA.900066575.sp900553635	infant_taxa_12__GCA.900066575.sp900553635	Infant Fecal Microbiome (Taxa)	1-2 months	stool_microbiome_infant	0.000491294	0.000491294	0.0366684	-0.225635	0.298972	0.783383	Higher in SVN
infant_taxa_12	Unknown_GCA.900066575	infant_taxa_12__Unknown_GCA.900066575	Infant Fecal Microbiome (Taxa)	1-2 months	stool_microbiome_infant	0.000491294	0.000491294	0.0366684	-0.225635	0.298972	0.783383	Higher in SVN
infant_taxa_12	Unknown_GCA.900066575.1	infant_taxa_12__Unknown_GCA.900066575.1	Infant Fecal Microbiome (Taxa)	1-2 months	stool_microbiome_infant	0.000491294	0.000491294	0.0366684	-0.225635	0.298972	0.783383	Higher in SVN
infant_taxa_12	Hungatella_A.sp003478355	infant_taxa_12__Hungatella_A.sp003478355	Infant Fecal Microbiome (Taxa)	1-2 months	stool_microbiome_infant	0.000491294	0.000491294	0.0366684	-0.225635	0.298972	0.783383	Higher in SVN
infant_taxa_12	Unknown_Hungatella_A	infant_taxa_12__Unknown_Hungatella_A	Infant Fecal Microbiome (Taxa)	1-2 months	stool_microbiome_infant	0.000491294	0.000491294	0.0366684	-0.225635	0.298972	0.783383	Higher in SVN
infant_taxa_12	Unknown_KLE1615	infant_taxa_12__Unknown_KLE1615	Infant Fecal Microbiome (Taxa)	1-2 months	stool_microbiome_infant	0.000491294	0.000491294	0.0366684	-0.225635	0.298972	0.783383	Higher in SVN
infant_taxa_12	Lachnospira.eligens_B	infant_taxa_12__Lachnospira.eligens_B	Infant Fecal Microbiome (Taxa)	1-2 months	stool_microbiome_infant	0.000491294	0.000491294	0.0366684	-0.225635	0.298972	0.783383	Higher in SVN
infant_taxa_12	Lachnospira.rogosae	infant_taxa_12__Lachnospira.rogosae	Infant Fecal Microbiome (Taxa)	1-2 months	stool_microbiome_infant	0.000491294	0.000491294	0.0366684	-0.225635	0.298972	0.783383	Higher in SVN
infant_taxa_12	Lachnospira.sp000436475	infant_taxa_12__Lachnospira.sp000436475	Infant Fecal Microbiome (Taxa)	1-2 months	stool_microbiome_infant	0.000491294	0.000491294	0.0366684	-0.225635	0.298972	0.783383	Higher in SVN
infant_taxa_12	Lachnospira.sp000436535	infant_taxa_12__Lachnospira.sp000436535	Infant Fecal Microbiome (Taxa)	1-2 months	stool_microbiome_infant	0.000491294	0.000491294	0.0366684	-0.225635	0.298972	0.783383	Higher in SVN
infant_taxa_12	Lachnospira.sp900316325	infant_taxa_12__Lachnospira.sp900316325	Infant Fecal Microbiome (Taxa)	1-2 months	stool_microbiome_infant	0.000491294	0.000491294	0.0366684	-0.225635	0.298972	0.783383	Higher in SVN
infant_taxa_12	Lachnospira.sp900545725	infant_taxa_12__Lachnospira.sp900545725	Infant Fecal Microbiome (Taxa)	1-2 months	stool_microbiome_infant	0.000491294	0.000491294	0.0366684	-0.225635	0.298972	0.783383	Higher in SVN
infant_taxa_12	Lachnospira.sp900547255	infant_taxa_12__Lachnospira.sp900547255	Infant Fecal Microbiome (Taxa)	1-2 months	stool_microbiome_infant	0.000491294	0.000491294	0.0366684	-0.225635	0.298972	0.783383	Higher in SVN
infant_taxa_12	Unknown_Lachnospira	infant_taxa_12__Unknown_Lachnospira	Infant Fecal Microbiome (Taxa)	1-2 months	stool_microbiome_infant	0.000491294	0.000491294	0.0366684	-0.225635	0.298972	0.783383	Higher in SVN
infant_taxa_12	Unknown_Lachnospira.1	infant_taxa_12__Unknown_Lachnospira.1	Infant Fecal Microbiome (Taxa)	1-2 months	stool_microbiome_infant	0.000491294	0.000491294	0.0366684	-0.225635	0.298972	0.783383	Higher in SVN
infant_taxa_12	Marvinbryantia.sp900066075	infant_taxa_12__Marvinbryantia.sp900066075	Infant Fecal Microbiome (Taxa)	1-2 months	stool_microbiome_infant	0.000491294	0.000491294	0.0366684	-0.225635	0.298972	0.783383	Higher in SVN
infant_taxa_12	Marvinbryantia.sp900544685	infant_taxa_12__Marvinbryantia.sp900544685	Infant Fecal Microbiome (Taxa)	1-2 months	stool_microbiome_infant	0.000491294	0.000491294	0.0366684	-0.225635	0.298972	0.783383	Higher in SVN
infant_taxa_12	Unknown_Marvinbryantia	infant_taxa_12__Unknown_Marvinbryantia	Infant Fecal Microbiome (Taxa)	1-2 months	stool_microbiome_infant	0.000491294	0.000491294	0.0366684	-0.225635	0.298972	0.783383	Higher in SVN
infant_taxa_12	Unknown_Marvinbryantia.1	infant_taxa_12__Unknown_Marvinbryantia.1	Infant Fecal Microbiome (Taxa)	1-2 months	stool_microbiome_infant	0.000491294	0.000491294	0.0366684	-0.225635	0.298972	0.783383	Higher in SVN
infant_taxa_12	Mediterraneibacter.faecis	infant_taxa_12__Mediterraneibacter.faecis	Infant Fecal Microbiome (Taxa)	1-2 months	stool_microbiome_infant	0.000491294	0.000491294	0.0366684	-0.225635	0.298972	0.783383	Higher in SVN
infant_taxa_12	Unknown_Mediterraneibacter.3	infant_taxa_12__Unknown_Mediterraneibacter.3	Infant Fecal Microbiome (Taxa)	1-2 months	stool_microbiome_infant	0.000491294	0.000491294	0.0366684	-0.225635	0.298972	0.783383	Higher in SVN
infant_taxa_12	Mediterraneibacter_A.butyricigenes	infant_taxa_12__Mediterraneibacter_A.butyricigenes	Infant Fecal Microbiome (Taxa)	1-2 months	stool_microbiome_infant	0.000491294	0.000491294	0.0366684	-0.225635	0.298972	0.783383	Higher in SVN
infant_taxa_12	Unknown_Mediterraneibacter_A	infant_taxa_12__Unknown_Mediterraneibacter_A	Infant Fecal Microbiome (Taxa)	1-2 months	stool_microbiome_infant	0.000491294	0.000491294	0.0366684	-0.225635	0.298972	0.783383	Higher in SVN
infant_taxa_12	Oribacterium.sp004554245	infant_taxa_12__Oribacterium.sp004554245	Infant Fecal Microbiome (Taxa)	1-2 months	stool_microbiome_infant	0.000491294	0.000491294	0.0366684	-0.225635	0.298972	0.783383	Higher in SVN
infant_taxa_12	Unknown_Oribacterium	infant_taxa_12__Unknown_Oribacterium	Infant Fecal Microbiome (Taxa)	1-2 months	stool_microbiome_infant	0.000491294	0.000491294	0.0366684	-0.225635	0.298972	0.783383	Higher in SVN
infant_taxa_12	Unknown_Oribacterium.3	infant_taxa_12__Unknown_Oribacterium.3	Infant Fecal Microbiome (Taxa)	1-2 months	stool_microbiome_infant	0.000491294	0.000491294	0.0366684	-0.225635	0.298972	0.783383	Higher in SVN
infant_taxa_12	Unknown_Oribacterium.4	infant_taxa_12__Unknown_Oribacterium.4	Infant Fecal Microbiome (Taxa)	1-2 months	stool_microbiome_infant	0.000491294	0.000491294	0.0366684	-0.225635	0.298972	0.783383	Higher in SVN
infant_taxa_12	Roseburia.hominis	infant_taxa_12__Roseburia.hominis	Infant Fecal Microbiome (Taxa)	1-2 months	stool_microbiome_infant	0.000491294	0.000491294	0.0366684	-0.225635	0.298972	0.783383	Higher in SVN
infant_taxa_12	Roseburia.intestinalis	infant_taxa_12__Roseburia.intestinalis	Infant Fecal Microbiome (Taxa)	1-2 months	stool_microbiome_infant	0.000491294	0.000491294	0.0366684	-0.225635	0.298972	0.783383	Higher in SVN
infant_taxa_12	Roseburia.sp001940165	infant_taxa_12__Roseburia.sp001940165	Infant Fecal Microbiome (Taxa)	1-2 months	stool_microbiome_infant	0.000491294	0.000491294	0.0366684	-0.225635	0.298972	0.783383	Higher in SVN
infant_taxa_12	Roseburia.sp900548205	infant_taxa_12__Roseburia.sp900548205	Infant Fecal Microbiome (Taxa)	1-2 months	stool_microbiome_infant	0.000491294	0.000491294	0.0366684	-0.225635	0.298972	0.783383	Higher in SVN
infant_taxa_12	Roseburia.sp900550935	infant_taxa_12__Roseburia.sp900550935	Infant Fecal Microbiome (Taxa)	1-2 months	stool_microbiome_infant	0.000491294	0.000491294	0.0366684	-0.225635	0.298972	0.783383	Higher in SVN
infant_taxa_12	Roseburia.sp900552665	infant_taxa_12__Roseburia.sp900552665	Infant Fecal Microbiome (Taxa)	1-2 months	stool_microbiome_infant	0.000491294	0.000491294	0.0366684	-0.225635	0.298972	0.783383	Higher in SVN
infant_taxa_12	Unknown_Roseburia.1	infant_taxa_12__Unknown_Roseburia.1	Infant Fecal Microbiome (Taxa)	1-2 months	stool_microbiome_infant	0.000491294	0.000491294	0.0366684	-0.225635	0.298972	0.783383	Higher in SVN
infant_taxa_12	Unknown_Roseburia.2	infant_taxa_12__Unknown_Roseburia.2	Infant Fecal Microbiome (Taxa)	1-2 months	stool_microbiome_infant	0.000491294	0.000491294	0.0366684	-0.225635	0.298972	0.783383	Higher in SVN
infant_taxa_12	Unknown_Roseburia.5	infant_taxa_12__Unknown_Roseburia.5	Infant Fecal Microbiome (Taxa)	1-2 months	stool_microbiome_infant	0.000491294	0.000491294	0.0366684	-0.225635	0.298972	0.783383	Higher in SVN
infant_taxa_12	Unknown_Roseburia.6	infant_taxa_12__Unknown_Roseburia.6	Infant Fecal Microbiome (Taxa)	1-2 months	stool_microbiome_infant	0.000491294	0.000491294	0.0366684	-0.225635	0.298972	0.783383	Higher in SVN
infant_taxa_12	Unknown_Roseburia.7	infant_taxa_12__Unknown_Roseburia.7	Infant Fecal Microbiome (Taxa)	1-2 months	stool_microbiome_infant	0.000491294	0.000491294	0.0366684	-0.225635	0.298972	0.783383	Higher in SVN
infant_taxa_12	Ruminococcus_A.sp000437095	infant_taxa_12__Ruminococcus_A.sp000437095	Infant Fecal Microbiome (Taxa)	1-2 months	stool_microbiome_infant	0.000491294	0.000491294	0.0366684	-0.225635	0.298972	0.783383	Higher in SVN
infant_taxa_12	Ruminococcus_A.sp003011855	infant_taxa_12__Ruminococcus_A.sp003011855	Infant Fecal Microbiome (Taxa)	1-2 months	stool_microbiome_infant	0.000491294	0.000491294	0.0366684	-0.225635	0.298972	0.783383	Higher in SVN
infant_taxa_12	Stomatobaculum.naviforme	infant_taxa_12__Stomatobaculum.naviforme	Infant Fecal Microbiome (Taxa)	1-2 months	stool_microbiome_infant	0.000491294	0.000491294	0.0366684	-0.225635	0.298972	0.783383	Higher in SVN
infant_taxa_12	TF01.11.sp000436755	infant_taxa_12__TF01.11.sp000436755	Infant Fecal Microbiome (Taxa)	1-2 months	stool_microbiome_infant	0.000491294	0.000491294	0.0366684	-0.225635	0.298972	0.783383	Higher in SVN
infant_taxa_12	TF01.11.sp001414325	infant_taxa_12__TF01.11.sp001414325	Infant Fecal Microbiome (Taxa)	1-2 months	stool_microbiome_infant	0.000491294	0.000491294	0.0366684	-0.225635	0.298972	0.783383	Higher in SVN
infant_taxa_12	TF01.11.sp003149875	infant_taxa_12__TF01.11.sp003149875	Infant Fecal Microbiome (Taxa)	1-2 months	stool_microbiome_infant	0.000491294	0.000491294	0.0366684	-0.225635	0.298972	0.783383	Higher in SVN
infant_taxa_12	TF01.11.sp003524945	infant_taxa_12__TF01.11.sp003524945	Infant Fecal Microbiome (Taxa)	1-2 months	stool_microbiome_infant	0.000491294	0.000491294	0.0366684	-0.225635	0.298972	0.783383	Higher in SVN
infant_taxa_12	Unknown_TF01.11.1	infant_taxa_12__Unknown_TF01.11.1	Infant Fecal Microbiome (Taxa)	1-2 months	stool_microbiome_infant	0.000491294	0.000491294	0.0366684	-0.225635	0.298972	0.783383	Higher in SVN
infant_taxa_12	Unknown_TF01.11.2	infant_taxa_12__Unknown_TF01.11.2	Infant Fecal Microbiome (Taxa)	1-2 months	stool_microbiome_infant	0.000491294	0.000491294	0.0366684	-0.225635	0.298972	0.783383	Higher in SVN
infant_taxa_12	Unknown_TF01.11.3	infant_taxa_12__Unknown_TF01.11.3	Infant Fecal Microbiome (Taxa)	1-2 months	stool_microbiome_infant	0.000491294	0.000491294	0.0366684	-0.225635	0.298972	0.783383	Higher in SVN
infant_taxa_12	Unknown_TF01.11.4	infant_taxa_12__Unknown_TF01.11.4	Infant Fecal Microbiome (Taxa)	1-2 months	stool_microbiome_infant	0.000491294	0.000491294	0.0366684	-0.225635	0.298972	0.783383	Higher in SVN
infant_taxa_12	Unknown_TF01.11.5	infant_taxa_12__Unknown_TF01.11.5	Infant Fecal Microbiome (Taxa)	1-2 months	stool_microbiome_infant	0.000491294	0.000491294	0.0366684	-0.225635	0.298972	0.783383	Higher in SVN
infant_taxa_12	Unknown_UBA2821	infant_taxa_12__Unknown_UBA2821	Infant Fecal Microbiome (Taxa)	1-2 months	stool_microbiome_infant	0.000491294	0.000491294	0.0366684	-0.225635	0.298972	0.783383	Higher in SVN
infant_taxa_12	UBA2882.sp900549665	infant_taxa_12__UBA2882.sp900549665	Infant Fecal Microbiome (Taxa)	1-2 months	stool_microbiome_infant	0.000491294	0.000491294	0.0366684	-0.225635	0.298972	0.783383	Higher in SVN
infant_taxa_12	UBA4285.sp900545225	infant_taxa_12__UBA4285.sp900545225	Infant Fecal Microbiome (Taxa)	1-2 months	stool_microbiome_infant	0.000491294	0.000491294	0.0366684	-0.225635	0.298972	0.783383	Higher in SVN
infant_taxa_12	Unknown_UBA7160	infant_taxa_12__Unknown_UBA7160	Infant Fecal Microbiome (Taxa)	1-2 months	stool_microbiome_infant	0.000491294	0.000491294	0.0366684	-0.225635	0.298972	0.783383	Higher in SVN
infant_taxa_12	UBA7182.sp003480725	infant_taxa_12__UBA7182.sp003480725	Infant Fecal Microbiome (Taxa)	1-2 months	stool_microbiome_infant	0.000491294	0.000491294	0.0366684	-0.225635	0.298972	0.783383	Higher in SVN
infant_taxa_12	UBA9502.sp003478505	infant_taxa_12__UBA9502.sp003478505	Infant Fecal Microbiome (Taxa)	1-2 months	stool_microbiome_infant	0.000491294	0.000491294	0.0366684	-0.225635	0.298972	0.783383	Higher in SVN
infant_taxa_12	UBA9502.sp003480315	infant_taxa_12__UBA9502.sp003480315	Infant Fecal Microbiome (Taxa)	1-2 months	stool_microbiome_infant	0.000491294	0.000491294	0.0366684	-0.225635	0.298972	0.783383	Higher in SVN
infant_taxa_12	UBA9502.sp900555625	infant_taxa_12__UBA9502.sp900555625	Infant Fecal Microbiome (Taxa)	1-2 months	stool_microbiome_infant	0.000491294	0.000491294	0.0366684	-0.225635	0.298972	0.783383	Higher in SVN
infant_taxa_12	Unknown_UBA9502	infant_taxa_12__Unknown_UBA9502	Infant Fecal Microbiome (Taxa)	1-2 months	stool_microbiome_infant	0.000491294	0.000491294	0.0366684	-0.225635	0.298972	0.783383	Higher in SVN
infant_taxa_12	Unknown_UBA9502.1	infant_taxa_12__Unknown_UBA9502.1	Infant Fecal Microbiome (Taxa)	1-2 months	stool_microbiome_infant	0.000491294	0.000491294	0.0366684	-0.225635	0.298972	0.783383	Higher in SVN
infant_taxa_12	Unknown_UMGS2037	infant_taxa_12__Unknown_UMGS2037	Infant Fecal Microbiome (Taxa)	1-2 months	stool_microbiome_infant	0.000491294	0.000491294	0.0366684	-0.225635	0.298972	0.783383	Higher in SVN
infant_taxa_12	Unknown_UMGS2037.1	infant_taxa_12__Unknown_UMGS2037.1	Infant Fecal Microbiome (Taxa)	1-2 months	stool_microbiome_infant	0.000491294	0.000491294	0.0366684	-0.225635	0.298972	0.783383	Higher in SVN
infant_taxa_12	Unknown_Lachnospiraceae	infant_taxa_12__Unknown_Lachnospiraceae	Infant Fecal Microbiome (Taxa)	1-2 months	stool_microbiome_infant	0.000491294	0.000491294	0.0366684	-0.225635	0.298972	0.783383	Higher in SVN
infant_taxa_12	Unknown_Lachnospiraceae.2	infant_taxa_12__Unknown_Lachnospiraceae.2	Infant Fecal Microbiome (Taxa)	1-2 months	stool_microbiome_infant	0.000491294	0.000491294	0.0366684	-0.225635	0.298972	0.783383	Higher in SVN
infant_taxa_12	Unknown_Lachnospiraceae.4	infant_taxa_12__Unknown_Lachnospiraceae.4	Infant Fecal Microbiome (Taxa)	1-2 months	stool_microbiome_infant	0.000491294	0.000491294	0.0366684	-0.225635	0.298972	0.783383	Higher in SVN
infant_taxa_12	Unknown_Lachnospiraceae.7	infant_taxa_12__Unknown_Lachnospiraceae.7	Infant Fecal Microbiome (Taxa)	1-2 months	stool_microbiome_infant	0.000491294	0.000491294	0.0366684	-0.225635	0.298972	0.783383	Higher in SVN
infant_taxa_12	Unknown_Lachnospiraceae.8	infant_taxa_12__Unknown_Lachnospiraceae.8	Infant Fecal Microbiome (Taxa)	1-2 months	stool_microbiome_infant	0.000491294	0.000491294	0.0366684	-0.225635	0.298972	0.783383	Higher in SVN
infant_taxa_12	Unknown_Lachnospiraceae.9	infant_taxa_12__Unknown_Lachnospiraceae.9	Infant Fecal Microbiome (Taxa)	1-2 months	stool_microbiome_infant	0.000491294	0.000491294	0.0366684	-0.225635	0.298972	0.783383	Higher in SVN
infant_taxa_12	Unknown_Lachnospiraceae.10	infant_taxa_12__Unknown_Lachnospiraceae.10	Infant Fecal Microbiome (Taxa)	1-2 months	stool_microbiome_infant	0.000491294	0.000491294	0.0366684	-0.225635	0.298972	0.783383	Higher in SVN
infant_taxa_12	Unknown_Lachnospiraceae.11	infant_taxa_12__Unknown_Lachnospiraceae.11	Infant Fecal Microbiome (Taxa)	1-2 months	stool_microbiome_infant	0.000491294	0.000491294	0.0366684	-0.225635	0.298972	0.783383	Higher in SVN
infant_taxa_12	Unknown_Lachnospiraceae.15	infant_taxa_12__Unknown_Lachnospiraceae.15	Infant Fecal Microbiome (Taxa)	1-2 months	stool_microbiome_infant	0.000491294	0.000491294	0.0366684	-0.225635	0.298972	0.783383	Higher in SVN
infant_taxa_12	Unknown_Lachnospiraceae.16	infant_taxa_12__Unknown_Lachnospiraceae.16	Infant Fecal Microbiome (Taxa)	1-2 months	stool_microbiome_infant	0.000491294	0.000491294	0.0366684	-0.225635	0.298972	0.783383	Higher in SVN
infant_taxa_12	Unknown_Lachnospiraceae.17	infant_taxa_12__Unknown_Lachnospiraceae.17	Infant Fecal Microbiome (Taxa)	1-2 months	stool_microbiome_infant	0.000491294	0.000491294	0.0366684	-0.225635	0.298972	0.783383	Higher in SVN
infant_taxa_12	Unknown_Lachnospiraceae.19	infant_taxa_12__Unknown_Lachnospiraceae.19	Infant Fecal Microbiome (Taxa)	1-2 months	stool_microbiome_infant	0.000491294	0.000491294	0.0366684	-0.225635	0.298972	0.783383	Higher in SVN
infant_taxa_12	Unknown_Lachnospiraceae.20	infant_taxa_12__Unknown_Lachnospiraceae.20	Infant Fecal Microbiome (Taxa)	1-2 months	stool_microbiome_infant	0.000491294	0.000491294	0.0366684	-0.225635	0.298972	0.783383	Higher in SVN
infant_taxa_12	V9D3004.sp002349525	infant_taxa_12__V9D3004.sp002349525	Infant Fecal Microbiome (Taxa)	1-2 months	stool_microbiome_infant	0.000491294	0.000491294	0.0366684	-0.225635	0.298972	0.783383	Higher in SVN
infant_taxa_12	Unknown_UBA1390_1	infant_taxa_12__Unknown_UBA1390_1	Infant Fecal Microbiome (Taxa)	1-2 months	stool_microbiome_infant	0.000491294	0.000491294	0.0366684	-0.225635	0.298972	0.783383	Higher in SVN
infant_taxa_12	Unknown_UBA1390_2	infant_taxa_12__Unknown_UBA1390_2	Infant Fecal Microbiome (Taxa)	1-2 months	stool_microbiome_infant	0.000491294	0.000491294	0.0366684	-0.225635	0.298972	0.783383	Higher in SVN
infant_taxa_12	Unknown_Lachnospirales	infant_taxa_12__Unknown_Lachnospirales	Infant Fecal Microbiome (Taxa)	1-2 months	stool_microbiome_infant	0.000491294	0.000491294	0.0366684	-0.225635	0.298972	0.783383	Higher in SVN
infant_taxa_12	Unknown_UBA1775	infant_taxa_12__Unknown_UBA1775	Infant Fecal Microbiome (Taxa)	1-2 months	stool_microbiome_infant	0.000491294	0.000491294	0.0366684	-0.225635	0.298972	0.783383	Higher in SVN
infant_taxa_12	Unknown_UMGS1326	infant_taxa_12__Unknown_UMGS1326	Infant Fecal Microbiome (Taxa)	1-2 months	stool_microbiome_infant	0.000491294	0.000491294	0.0366684	-0.225635	0.298972	0.783383	Higher in SVN
infant_taxa_12	Unknown_UMGS1326.1	infant_taxa_12__Unknown_UMGS1326.1	Infant Fecal Microbiome (Taxa)	1-2 months	stool_microbiome_infant	0.000491294	0.000491294	0.0366684	-0.225635	0.298972	0.783383	Higher in SVN
infant_taxa_12	UMGS1494.sp900552305	infant_taxa_12__UMGS1494.sp900552305	Infant Fecal Microbiome (Taxa)	1-2 months	stool_microbiome_infant	0.000491294	0.000491294	0.0366684	-0.225635	0.298972	0.783383	Higher in SVN
infant_taxa_12	UMGS1820.sp900545865	infant_taxa_12__UMGS1820.sp900545865	Infant Fecal Microbiome (Taxa)	1-2 months	stool_microbiome_infant	0.000491294	0.000491294	0.0366684	-0.225635	0.298972	0.783383	Higher in SVN
infant_taxa_12	UMGS1820.sp900555375	infant_taxa_12__UMGS1820.sp900555375	Infant Fecal Microbiome (Taxa)	1-2 months	stool_microbiome_infant	0.000491294	0.000491294	0.0366684	-0.225635	0.298972	0.783383	Higher in SVN
infant_taxa_12	CAG.41.sp900066215	infant_taxa_12__CAG.41.sp900066215	Infant Fecal Microbiome (Taxa)	1-2 months	stool_microbiome_infant	0.000491294	0.000491294	0.0366684	-0.225635	0.298972	0.783383	Higher in SVN
infant_taxa_12	UBA4716.sp900556575	infant_taxa_12__UBA4716.sp900556575	Infant Fecal Microbiome (Taxa)	1-2 months	stool_microbiome_infant	0.000491294	0.000491294	0.0366684	-0.225635	0.298972	0.783383	Higher in SVN
infant_taxa_12	Unknown_UBA4716	infant_taxa_12__Unknown_UBA4716	Infant Fecal Microbiome (Taxa)	1-2 months	stool_microbiome_infant	0.000491294	0.000491294	0.0366684	-0.225635	0.298972	0.783383	Higher in SVN
infant_taxa_12	Unknown_UBA4716.1	infant_taxa_12__Unknown_UBA4716.1	Infant Fecal Microbiome (Taxa)	1-2 months	stool_microbiome_infant	0.000491294	0.000491294	0.0366684	-0.225635	0.298972	0.783383	Higher in SVN
infant_taxa_12	Unknown_UBA4716.2	infant_taxa_12__Unknown_UBA4716.2	Infant Fecal Microbiome (Taxa)	1-2 months	stool_microbiome_infant	0.000491294	0.000491294	0.0366684	-0.225635	0.298972	0.783383	Higher in SVN
infant_taxa_12	Unknown_UBA1381.2	infant_taxa_12__Unknown_UBA1381.2	Infant Fecal Microbiome (Taxa)	1-2 months	stool_microbiome_infant	0.000491294	0.000491294	0.0366684	-0.225635	0.298972	0.783383	Higher in SVN
infant_taxa_12	Unknown_UBA1381.3	infant_taxa_12__Unknown_UBA1381.3	Infant Fecal Microbiome (Taxa)	1-2 months	stool_microbiome_infant	0.000491294	0.000491294	0.0366684	-0.225635	0.298972	0.783383	Higher in SVN
infant_taxa_12	Unknown_UBA1381.4	infant_taxa_12__Unknown_UBA1381.4	Infant Fecal Microbiome (Taxa)	1-2 months	stool_microbiome_infant	0.000491294	0.000491294	0.0366684	-0.225635	0.298972	0.783383	Higher in SVN
infant_taxa_12	Unknown_UBA1381.6	infant_taxa_12__Unknown_UBA1381.6	Infant Fecal Microbiome (Taxa)	1-2 months	stool_microbiome_infant	0.000491294	0.000491294	0.0366684	-0.225635	0.298972	0.783383	Higher in SVN
infant_taxa_12	Unknown_UBA1381.7	infant_taxa_12__Unknown_UBA1381.7	Infant Fecal Microbiome (Taxa)	1-2 months	stool_microbiome_infant	0.000491294	0.000491294	0.0366684	-0.225635	0.298972	0.783383	Higher in SVN
infant_taxa_12	Unknown_UBA1381.10	infant_taxa_12__Unknown_UBA1381.10	Infant Fecal Microbiome (Taxa)	1-2 months	stool_microbiome_infant	0.000491294	0.000491294	0.0366684	-0.225635	0.298972	0.783383	Higher in SVN
infant_taxa_12	Unknown_UBA1381.11	infant_taxa_12__Unknown_UBA1381.11	Infant Fecal Microbiome (Taxa)	1-2 months	stool_microbiome_infant	0.000491294	0.000491294	0.0366684	-0.225635	0.298972	0.783383	Higher in SVN
infant_taxa_12	Unknown_UBA1381.12	infant_taxa_12__Unknown_UBA1381.12	Infant Fecal Microbiome (Taxa)	1-2 months	stool_microbiome_infant	0.000491294	0.000491294	0.0366684	-0.225635	0.298972	0.783383	Higher in SVN
infant_taxa_12	Unknown_UBA1381.13	infant_taxa_12__Unknown_UBA1381.13	Infant Fecal Microbiome (Taxa)	1-2 months	stool_microbiome_infant	0.000491294	0.000491294	0.0366684	-0.225635	0.298972	0.783383	Higher in SVN
infant_taxa_12	Unknown_UBA1381.14	infant_taxa_12__Unknown_UBA1381.14	Infant Fecal Microbiome (Taxa)	1-2 months	stool_microbiome_infant	0.000491294	0.000491294	0.0366684	-0.225635	0.298972	0.783383	Higher in SVN
infant_taxa_12	UMGS755.sp900545185	infant_taxa_12__UMGS755.sp900545185	Infant Fecal Microbiome (Taxa)	1-2 months	stool_microbiome_infant	0.000491294	0.000491294	0.0366684	-0.225635	0.298972	0.783383	Higher in SVN
infant_taxa_12	Unknown_UMGS1253_1	infant_taxa_12__Unknown_UMGS1253_1	Infant Fecal Microbiome (Taxa)	1-2 months	stool_microbiome_infant	0.000491294	0.000491294	0.0366684	-0.225635	0.298972	0.783383	Higher in SVN
infant_taxa_12	Unknown_UMGS1253_2	infant_taxa_12__Unknown_UMGS1253_2	Infant Fecal Microbiome (Taxa)	1-2 months	stool_microbiome_infant	0.000491294	0.000491294	0.0366684	-0.225635	0.298972	0.783383	Higher in SVN
infant_taxa_12	Unknown_Monoglobales_A.1	infant_taxa_12__Unknown_Monoglobales_A.1	Infant Fecal Microbiome (Taxa)	1-2 months	stool_microbiome_infant	0.000491294	0.000491294	0.0366684	-0.225635	0.298972	0.783383	Higher in SVN
infant_taxa_12	CAG.177.sp000431775	infant_taxa_12__CAG.177.sp000431775	Infant Fecal Microbiome (Taxa)	1-2 months	stool_microbiome_infant	0.000491294	0.000491294	0.0366684	-0.225635	0.298972	0.783383	Higher in SVN
infant_taxa_12	CAG.180.sp000432435	infant_taxa_12__CAG.180.sp000432435	Infant Fecal Microbiome (Taxa)	1-2 months	stool_microbiome_infant	0.000491294	0.000491294	0.216846	-0.0442544	0.477946	0.103209	Higher in SVN
infant_taxa_12	Unknown_CAG.180	infant_taxa_12__Unknown_CAG.180	Infant Fecal Microbiome (Taxa)	1-2 months	stool_microbiome_infant	0.000491294	0.000491294	0.0366684	-0.225635	0.298972	0.783383	Higher in SVN
infant_taxa_12	CAG.217.sp000436335	infant_taxa_12__CAG.217.sp000436335	Infant Fecal Microbiome (Taxa)	1-2 months	stool_microbiome_infant	0.000491294	0.000491294	0.0366684	-0.225635	0.298972	0.783383	Higher in SVN
infant_taxa_12	CAG.488.sp000434055	infant_taxa_12__CAG.488.sp000434055	Infant Fecal Microbiome (Taxa)	1-2 months	stool_microbiome_infant	0.000491294	0.000491294	0.0366684	-0.225635	0.298972	0.783383	Higher in SVN
infant_taxa_12	CAG.488.sp000434915	infant_taxa_12__CAG.488.sp000434915	Infant Fecal Microbiome (Taxa)	1-2 months	stool_microbiome_infant	0.000491294	0.000491294	0.0366684	-0.225635	0.298972	0.783383	Higher in SVN
infant_taxa_12	Unknown_CAG.488	infant_taxa_12__Unknown_CAG.488	Infant Fecal Microbiome (Taxa)	1-2 months	stool_microbiome_infant	0.000491294	0.000491294	0.0366684	-0.225635	0.298972	0.783383	Higher in SVN
infant_taxa_12	Unknown_CAG.488.1	infant_taxa_12__Unknown_CAG.488.1	Infant Fecal Microbiome (Taxa)	1-2 months	stool_microbiome_infant	0.000491294	0.000491294	0.0366684	-0.225635	0.298972	0.783383	Higher in SVN
infant_taxa_12	CAG.557.sp000435275	infant_taxa_12__CAG.557.sp000435275	Infant Fecal Microbiome (Taxa)	1-2 months	stool_microbiome_infant	0.000491294	0.000491294	0.0366684	-0.225635	0.298972	0.783383	Higher in SVN
infant_taxa_12	CAG.964.sp000435335	infant_taxa_12__CAG.964.sp000435335	Infant Fecal Microbiome (Taxa)	1-2 months	stool_microbiome_infant	0.000491294	0.000491294	0.0366684	-0.225635	0.298972	0.783383	Higher in SVN
infant_taxa_12	Clostridium_E.jeddahense	infant_taxa_12__Clostridium_E.jeddahense	Infant Fecal Microbiome (Taxa)	1-2 months	stool_microbiome_infant	0.000491294	0.000491294	0.101214	-0.160856	0.363284	0.447753	Higher in SVN
infant_taxa_12	Eubacterium_R.sp000433975	infant_taxa_12__Eubacterium_R.sp000433975	Infant Fecal Microbiome (Taxa)	1-2 months	stool_microbiome_infant	0.000491294	0.000491294	0.0366684	-0.225635	0.298972	0.783383	Higher in SVN
infant_taxa_12	Eubacterium_R.sp000434995	infant_taxa_12__Eubacterium_R.sp000434995	Infant Fecal Microbiome (Taxa)	1-2 months	stool_microbiome_infant	0.000491294	0.000491294	0.0366684	-0.225635	0.298972	0.783383	Higher in SVN
infant_taxa_12	Eubacterium_R.sp000436835	infant_taxa_12__Eubacterium_R.sp000436835	Infant Fecal Microbiome (Taxa)	1-2 months	stool_microbiome_infant	0.000491294	0.000491294	0.0366684	-0.225635	0.298972	0.783383	Higher in SVN
infant_taxa_12	Eubacterium_R.sp003526845	infant_taxa_12__Eubacterium_R.sp003526845	Infant Fecal Microbiome (Taxa)	1-2 months	stool_microbiome_infant	0.000491294	0.000491294	0.0366684	-0.225635	0.298972	0.783383	Higher in SVN
infant_taxa_12	Eubacterium_R.sp900539165	infant_taxa_12__Eubacterium_R.sp900539165	Infant Fecal Microbiome (Taxa)	1-2 months	stool_microbiome_infant	0.000491294	0.000491294	0.0366684	-0.225635	0.298972	0.783383	Higher in SVN
infant_taxa_12	Eubacterium_R.sp900548085	infant_taxa_12__Eubacterium_R.sp900548085	Infant Fecal Microbiome (Taxa)	1-2 months	stool_microbiome_infant	0.000491294	0.000491294	0.0366684	-0.225635	0.298972	0.783383	Higher in SVN
infant_taxa_12	Unknown_Eubacterium_R	infant_taxa_12__Unknown_Eubacterium_R	Infant Fecal Microbiome (Taxa)	1-2 months	stool_microbiome_infant	0.000491294	0.000491294	0.0366684	-0.225635	0.298972	0.783383	Higher in SVN
infant_taxa_12	Unknown_Eubacterium_R.1	infant_taxa_12__Unknown_Eubacterium_R.1	Infant Fecal Microbiome (Taxa)	1-2 months	stool_microbiome_infant	0.000491294	0.000491294	0.0366684	-0.225635	0.298972	0.783383	Higher in SVN
infant_taxa_12	Unknown_Eubacterium_R.3	infant_taxa_12__Unknown_Eubacterium_R.3	Infant Fecal Microbiome (Taxa)	1-2 months	stool_microbiome_infant	0.000491294	0.000491294	0.0366684	-0.225635	0.298972	0.783383	Higher in SVN
infant_taxa_12	Unknown_Eubacterium_R.4	infant_taxa_12__Unknown_Eubacterium_R.4	Infant Fecal Microbiome (Taxa)	1-2 months	stool_microbiome_infant	0.000491294	0.000491294	0.0366684	-0.225635	0.298972	0.783383	Higher in SVN
infant_taxa_12	RUG806.sp900313475	infant_taxa_12__RUG806.sp900313475	Infant Fecal Microbiome (Taxa)	1-2 months	stool_microbiome_infant	0.000491294	0.000491294	0.0366684	-0.225635	0.298972	0.783383	Higher in SVN
infant_taxa_12	Unknown_RUG806	infant_taxa_12__Unknown_RUG806	Infant Fecal Microbiome (Taxa)	1-2 months	stool_microbiome_infant	0.000491294	0.000491294	0.0366684	-0.225635	0.298972	0.783383	Higher in SVN
infant_taxa_12	Ruminococcus_E.bromii_A	infant_taxa_12__Ruminococcus_E.bromii_A	Infant Fecal Microbiome (Taxa)	1-2 months	stool_microbiome_infant	0.000491294	0.000491294	0.0366684	-0.225635	0.298972	0.783383	Higher in SVN
infant_taxa_12	Ruminococcus_E.bromii_B	infant_taxa_12__Ruminococcus_E.bromii_B	Infant Fecal Microbiome (Taxa)	1-2 months	stool_microbiome_infant	0.000491294	0.000491294	0.0366684	-0.225635	0.298972	0.783383	Higher in SVN
infant_taxa_12	Ruminococcus_E.sp003438075	infant_taxa_12__Ruminococcus_E.sp003438075	Infant Fecal Microbiome (Taxa)	1-2 months	stool_microbiome_infant	0.000491294	0.000491294	0.0366684	-0.225635	0.298972	0.783383	Higher in SVN
infant_taxa_12	Unknown_Ruminococcus_E	infant_taxa_12__Unknown_Ruminococcus_E	Infant Fecal Microbiome (Taxa)	1-2 months	stool_microbiome_infant	0.000491294	0.000491294	0.0366684	-0.225635	0.298972	0.783383	Higher in SVN
infant_taxa_12	Unknown_Ruminococcus_E.1	infant_taxa_12__Unknown_Ruminococcus_E.1	Infant Fecal Microbiome (Taxa)	1-2 months	stool_microbiome_infant	0.000491294	0.000491294	0.0366684	-0.225635	0.298972	0.783383	Higher in SVN
infant_taxa_12	Ruminococcus_H.sp003531055	infant_taxa_12__Ruminococcus_H.sp003531055	Infant Fecal Microbiome (Taxa)	1-2 months	stool_microbiome_infant	0.000491294	0.000491294	0.0366684	-0.225635	0.298972	0.783383	Higher in SVN
infant_taxa_12	UBA1081.sp900543395	infant_taxa_12__UBA1081.sp900543395	Infant Fecal Microbiome (Taxa)	1-2 months	stool_microbiome_infant	0.000491294	0.000491294	0.0366684	-0.225635	0.298972	0.783383	Higher in SVN
infant_taxa_12	Unknown_UBA1081	infant_taxa_12__Unknown_UBA1081	Infant Fecal Microbiome (Taxa)	1-2 months	stool_microbiome_infant	0.000491294	0.000491294	0.0366684	-0.225635	0.298972	0.783383	Higher in SVN
infant_taxa_12	UBA5905.sp004558485	infant_taxa_12__UBA5905.sp004558485	Infant Fecal Microbiome (Taxa)	1-2 months	stool_microbiome_infant	0.000491294	0.000491294	0.0366684	-0.225635	0.298972	0.783383	Higher in SVN
infant_taxa_12	UBA5905.sp900549155	infant_taxa_12__UBA5905.sp900549155	Infant Fecal Microbiome (Taxa)	1-2 months	stool_microbiome_infant	0.000491294	0.000491294	0.0366684	-0.225635	0.298972	0.783383	Higher in SVN
infant_taxa_12	Unknown_UBA5905	infant_taxa_12__Unknown_UBA5905	Infant Fecal Microbiome (Taxa)	1-2 months	stool_microbiome_infant	0.000491294	0.000491294	0.0366684	-0.225635	0.298972	0.783383	Higher in SVN
infant_taxa_12	Unknown_UBA5905.1	infant_taxa_12__Unknown_UBA5905.1	Infant Fecal Microbiome (Taxa)	1-2 months	stool_microbiome_infant	0.000491294	0.000491294	0.0366684	-0.225635	0.298972	0.783383	Higher in SVN
infant_taxa_12	Unknown_UBA5905.2	infant_taxa_12__Unknown_UBA5905.2	Infant Fecal Microbiome (Taxa)	1-2 months	stool_microbiome_infant	0.000491294	0.000491294	0.0366684	-0.225635	0.298972	0.783383	Higher in SVN
infant_taxa_12	Unknown_UBA6857.1	infant_taxa_12__Unknown_UBA6857.1	Infant Fecal Microbiome (Taxa)	1-2 months	stool_microbiome_infant	0.000491294	0.000491294	0.0366684	-0.225635	0.298972	0.783383	Higher in SVN
infant_taxa_12	Unknown_UBA6857.2	infant_taxa_12__Unknown_UBA6857.2	Infant Fecal Microbiome (Taxa)	1-2 months	stool_microbiome_infant	0.000491294	0.000491294	0.0366684	-0.225635	0.298972	0.783383	Higher in SVN
infant_taxa_12	Unknown_UBA6857.3	infant_taxa_12__Unknown_UBA6857.3	Infant Fecal Microbiome (Taxa)	1-2 months	stool_microbiome_infant	0.000491294	0.000491294	0.0366684	-0.225635	0.298972	0.783383	Higher in SVN
infant_taxa_12	UBA737.sp002451855	infant_taxa_12__UBA737.sp002451855	Infant Fecal Microbiome (Taxa)	1-2 months	stool_microbiome_infant	0.000491294	0.000491294	0.0366684	-0.225635	0.298972	0.783383	Higher in SVN
infant_taxa_12	UBA737.sp900543215	infant_taxa_12__UBA737.sp900543215	Infant Fecal Microbiome (Taxa)	1-2 months	stool_microbiome_infant	0.000491294	0.000491294	0.0366684	-0.225635	0.298972	0.783383	Higher in SVN
infant_taxa_12	UBA737.sp900549055	infant_taxa_12__UBA737.sp900549055	Infant Fecal Microbiome (Taxa)	1-2 months	stool_microbiome_infant	0.000491294	0.000491294	0.0366684	-0.225635	0.298972	0.783383	Higher in SVN
infant_taxa_12	UBA737.sp900549755	infant_taxa_12__UBA737.sp900549755	Infant Fecal Microbiome (Taxa)	1-2 months	stool_microbiome_infant	0.000491294	0.000491294	0.0366684	-0.225635	0.298972	0.783383	Higher in SVN
infant_taxa_12	UBA737.sp900549755.1	infant_taxa_12__UBA737.sp900549755.1	Infant Fecal Microbiome (Taxa)	1-2 months	stool_microbiome_infant	0.000491294	0.000491294	0.0366684	-0.225635	0.298972	0.783383	Higher in SVN
infant_taxa_12	Unknown_UBA737	infant_taxa_12__Unknown_UBA737	Infant Fecal Microbiome (Taxa)	1-2 months	stool_microbiome_infant	0.000491294	0.000491294	0.0366684	-0.225635	0.298972	0.783383	Higher in SVN
infant_taxa_12	Unknown_UBA737.1	infant_taxa_12__Unknown_UBA737.1	Infant Fecal Microbiome (Taxa)	1-2 months	stool_microbiome_infant	0.000491294	0.000491294	0.0366684	-0.225635	0.298972	0.783383	Higher in SVN
infant_taxa_12	Unknown_UBA737.5	infant_taxa_12__Unknown_UBA737.5	Infant Fecal Microbiome (Taxa)	1-2 months	stool_microbiome_infant	0.000491294	0.000491294	0.0366684	-0.225635	0.298972	0.783383	Higher in SVN
infant_taxa_12	Unknown_UBA737.6	infant_taxa_12__Unknown_UBA737.6	Infant Fecal Microbiome (Taxa)	1-2 months	stool_microbiome_infant	0.000491294	0.000491294	0.0366684	-0.225635	0.298972	0.783383	Higher in SVN
infant_taxa_12	Unknown_UBA737.7	infant_taxa_12__Unknown_UBA737.7	Infant Fecal Microbiome (Taxa)	1-2 months	stool_microbiome_infant	0.000491294	0.000491294	0.0366684	-0.225635	0.298972	0.783383	Higher in SVN
infant_taxa_12	Unknown_UBA737.9	infant_taxa_12__Unknown_UBA737.9	Infant Fecal Microbiome (Taxa)	1-2 months	stool_microbiome_infant	0.000491294	0.000491294	0.0366684	-0.225635	0.298972	0.783383	Higher in SVN
infant_taxa_12	UMGS1071.sp900542375	infant_taxa_12__UMGS1071.sp900542375	Infant Fecal Microbiome (Taxa)	1-2 months	stool_microbiome_infant	0.000491294	0.000491294	0.0366684	-0.225635	0.298972	0.783383	Higher in SVN
infant_taxa_12	Unknown_UMGS1071.2	infant_taxa_12__Unknown_UMGS1071.2	Infant Fecal Microbiome (Taxa)	1-2 months	stool_microbiome_infant	0.000491294	0.000491294	0.0366684	-0.225635	0.298972	0.783383	Higher in SVN
infant_taxa_12	UMGS1224.sp900549775	infant_taxa_12__UMGS1224.sp900549775	Infant Fecal Microbiome (Taxa)	1-2 months	stool_microbiome_infant	0.000491294	0.000491294	0.0366684	-0.225635	0.298972	0.783383	Higher in SVN
infant_taxa_12	UMGS1279.sp900550315	infant_taxa_12__UMGS1279.sp900550315	Infant Fecal Microbiome (Taxa)	1-2 months	stool_microbiome_infant	0.000491294	0.000491294	0.0366684	-0.225635	0.298972	0.783383	Higher in SVN
infant_taxa_12	Unknown_UMGS1279	infant_taxa_12__Unknown_UMGS1279	Infant Fecal Microbiome (Taxa)	1-2 months	stool_microbiome_infant	0.000491294	0.000491294	0.0366684	-0.225635	0.298972	0.783383	Higher in SVN
infant_taxa_12	Unknown_UMGS1279.1	infant_taxa_12__Unknown_UMGS1279.1	Infant Fecal Microbiome (Taxa)	1-2 months	stool_microbiome_infant	0.000491294	0.000491294	0.0366684	-0.225635	0.298972	0.783383	Higher in SVN
infant_taxa_12	UMGS1487.sp900552225	infant_taxa_12__UMGS1487.sp900552225	Infant Fecal Microbiome (Taxa)	1-2 months	stool_microbiome_infant	0.000491294	0.000491294	0.0366684	-0.225635	0.298972	0.783383	Higher in SVN
infant_taxa_12	Unknown_UMGS1487	infant_taxa_12__Unknown_UMGS1487	Infant Fecal Microbiome (Taxa)	1-2 months	stool_microbiome_infant	0.000491294	0.000491294	0.0366684	-0.225635	0.298972	0.783383	Higher in SVN
infant_taxa_12	Unknown_UMGS1487.1	infant_taxa_12__Unknown_UMGS1487.1	Infant Fecal Microbiome (Taxa)	1-2 months	stool_microbiome_infant	0.000491294	0.000491294	0.0366684	-0.225635	0.298972	0.783383	Higher in SVN
infant_taxa_12	UMGS1491.sp900554335	infant_taxa_12__UMGS1491.sp900554335	Infant Fecal Microbiome (Taxa)	1-2 months	stool_microbiome_infant	0.000491294	0.000491294	0.0366684	-0.225635	0.298972	0.783383	Higher in SVN
infant_taxa_12	UMGS1491.sp900554775	infant_taxa_12__UMGS1491.sp900554775	Infant Fecal Microbiome (Taxa)	1-2 months	stool_microbiome_infant	0.000491294	0.000491294	0.0366684	-0.225635	0.298972	0.783383	Higher in SVN
infant_taxa_12	Unknown_UMGS1491.2	infant_taxa_12__Unknown_UMGS1491.2	Infant Fecal Microbiome (Taxa)	1-2 months	stool_microbiome_infant	0.000491294	0.000491294	0.0366684	-0.225635	0.298972	0.783383	Higher in SVN
infant_taxa_12	Unknown_UMGS1491.3	infant_taxa_12__Unknown_UMGS1491.3	Infant Fecal Microbiome (Taxa)	1-2 months	stool_microbiome_infant	0.000491294	0.000491294	0.0366684	-0.225635	0.298972	0.783383	Higher in SVN
infant_taxa_12	Unknown_UMGS1491.4	infant_taxa_12__Unknown_UMGS1491.4	Infant Fecal Microbiome (Taxa)	1-2 months	stool_microbiome_infant	0.000491294	0.000491294	0.0366684	-0.225635	0.298972	0.783383	Higher in SVN
infant_taxa_12	Unknown_UMGS1491.5	infant_taxa_12__Unknown_UMGS1491.5	Infant Fecal Microbiome (Taxa)	1-2 months	stool_microbiome_infant	0.000491294	0.000491294	0.0366684	-0.225635	0.298972	0.783383	Higher in SVN
infant_taxa_12	Unknown_UMGS1491.6	infant_taxa_12__Unknown_UMGS1491.6	Infant Fecal Microbiome (Taxa)	1-2 months	stool_microbiome_infant	0.000491294	0.000491294	0.0366684	-0.225635	0.298972	0.783383	Higher in SVN
infant_taxa_12	Unknown_UMGS1623	infant_taxa_12__Unknown_UMGS1623	Infant Fecal Microbiome (Taxa)	1-2 months	stool_microbiome_infant	0.000491294	0.000491294	0.0366684	-0.225635	0.298972	0.783383	Higher in SVN
infant_taxa_12	Unknown_UMGS1623.1	infant_taxa_12__Unknown_UMGS1623.1	Infant Fecal Microbiome (Taxa)	1-2 months	stool_microbiome_infant	0.000491294	0.000491294	0.0366684	-0.225635	0.298972	0.783383	Higher in SVN
infant_taxa_12	UMGS172.sp900539855	infant_taxa_12__UMGS172.sp900539855	Infant Fecal Microbiome (Taxa)	1-2 months	stool_microbiome_infant	0.000491294	0.000491294	0.0366684	-0.225635	0.298972	0.783383	Higher in SVN
infant_taxa_12	Unknown_UMGS1858	infant_taxa_12__Unknown_UMGS1858	Infant Fecal Microbiome (Taxa)	1-2 months	stool_microbiome_infant	0.000491294	0.000491294	0.0366684	-0.225635	0.298972	0.783383	Higher in SVN
infant_taxa_12	UMGS1976.sp900556765	infant_taxa_12__UMGS1976.sp900556765	Infant Fecal Microbiome (Taxa)	1-2 months	stool_microbiome_infant	0.000491294	0.000491294	0.0366684	-0.225635	0.298972	0.783383	Higher in SVN
infant_taxa_12	Unknown_Acutalibacteraceae.1	infant_taxa_12__Unknown_Acutalibacteraceae.1	Infant Fecal Microbiome (Taxa)	1-2 months	stool_microbiome_infant	0.000491294	0.000491294	0.0366684	-0.225635	0.298972	0.783383	Higher in SVN
infant_taxa_12	Unknown_Acutalibacteraceae.2	infant_taxa_12__Unknown_Acutalibacteraceae.2	Infant Fecal Microbiome (Taxa)	1-2 months	stool_microbiome_infant	0.000491294	0.000491294	0.0366684	-0.225635	0.298972	0.783383	Higher in SVN
infant_taxa_12	Unknown_Acutalibacteraceae.3	infant_taxa_12__Unknown_Acutalibacteraceae.3	Infant Fecal Microbiome (Taxa)	1-2 months	stool_microbiome_infant	0.000491294	0.000491294	0.0366684	-0.225635	0.298972	0.783383	Higher in SVN
infant_taxa_12	Unknown_Acutalibacteraceae.4	infant_taxa_12__Unknown_Acutalibacteraceae.4	Infant Fecal Microbiome (Taxa)	1-2 months	stool_microbiome_infant	0.000491294	0.000491294	0.0366684	-0.225635	0.298972	0.783383	Higher in SVN
infant_taxa_12	Unknown_Acutalibacteraceae.5	infant_taxa_12__Unknown_Acutalibacteraceae.5	Infant Fecal Microbiome (Taxa)	1-2 months	stool_microbiome_infant	0.000491294	0.000491294	0.0366684	-0.225635	0.298972	0.783383	Higher in SVN
infant_taxa_12	Unknown_Acutalibacteraceae.9	infant_taxa_12__Unknown_Acutalibacteraceae.9	Infant Fecal Microbiome (Taxa)	1-2 months	stool_microbiome_infant	0.000491294	0.000491294	0.0366684	-0.225635	0.298972	0.783383	Higher in SVN
infant_taxa_12	Unknown_Acutalibacteraceae.10	infant_taxa_12__Unknown_Acutalibacteraceae.10	Infant Fecal Microbiome (Taxa)	1-2 months	stool_microbiome_infant	0.000491294	0.000491294	0.0366684	-0.225635	0.298972	0.783383	Higher in SVN
infant_taxa_12	Unknown_Acutalibacteraceae.11	infant_taxa_12__Unknown_Acutalibacteraceae.11	Infant Fecal Microbiome (Taxa)	1-2 months	stool_microbiome_infant	0.000491294	0.000491294	0.0366684	-0.225635	0.298972	0.783383	Higher in SVN
infant_taxa_12	Unknown_Acutalibacteraceae.13	infant_taxa_12__Unknown_Acutalibacteraceae.13	Infant Fecal Microbiome (Taxa)	1-2 months	stool_microbiome_infant	0.000491294	0.000491294	0.0366684	-0.225635	0.298972	0.783383	Higher in SVN
infant_taxa_12	Unknown_Acutalibacteraceae.14	infant_taxa_12__Unknown_Acutalibacteraceae.14	Infant Fecal Microbiome (Taxa)	1-2 months	stool_microbiome_infant	0.000491294	0.000491294	0.0366684	-0.225635	0.298972	0.783383	Higher in SVN
infant_taxa_12	Unknown_Acutalibacteraceae.17	infant_taxa_12__Unknown_Acutalibacteraceae.17	Infant Fecal Microbiome (Taxa)	1-2 months	stool_microbiome_infant	0.000491294	0.000491294	0.0366684	-0.225635	0.298972	0.783383	Higher in SVN
infant_taxa_12	Unknown_Acutalibacteraceae.18	infant_taxa_12__Unknown_Acutalibacteraceae.18	Infant Fecal Microbiome (Taxa)	1-2 months	stool_microbiome_infant	0.000491294	0.000491294	0.0366684	-0.225635	0.298972	0.783383	Higher in SVN
infant_taxa_12	AM07.15.sp003477405	infant_taxa_12__AM07.15.sp003477405	Infant Fecal Microbiome (Taxa)	1-2 months	stool_microbiome_infant	0.000491294	0.000491294	0.0366684	-0.225635	0.298972	0.783383	Higher in SVN
infant_taxa_12	Agathobaculum.butyriciproducens	infant_taxa_12__Agathobaculum.butyriciproducens	Infant Fecal Microbiome (Taxa)	1-2 months	stool_microbiome_infant	0.000491294	0.000491294	0.219787	-0.0412796	0.480853	0.0985963	Higher in SVN
infant_taxa_12	Agathobaculum.sp003481705	infant_taxa_12__Agathobaculum.sp003481705	Infant Fecal Microbiome (Taxa)	1-2 months	stool_microbiome_infant	0.000491294	0.000491294	0.0366684	-0.225635	0.298972	0.783383	Higher in SVN
infant_taxa_12	Butyricicoccus_A.sp002395695	infant_taxa_12__Butyricicoccus_A.sp002395695	Infant Fecal Microbiome (Taxa)	1-2 months	stool_microbiome_infant	0.000491294	0.000491294	0.0366684	-0.225635	0.298972	0.783383	Higher in SVN
infant_taxa_12	Unknown_SCN.57.10	infant_taxa_12__Unknown_SCN.57.10	Infant Fecal Microbiome (Taxa)	1-2 months	stool_microbiome_infant	0.000491294	0.000491294	0.0366684	-0.225635	0.298972	0.783383	Higher in SVN
infant_taxa_12	UBA4644.sp900555855	infant_taxa_12__UBA4644.sp900555855	Infant Fecal Microbiome (Taxa)	1-2 months	stool_microbiome_infant	0.000491294	0.000491294	0.0366684	-0.225635	0.298972	0.783383	Higher in SVN
infant_taxa_12	Unknown_UMGS1384	infant_taxa_12__Unknown_UMGS1384	Infant Fecal Microbiome (Taxa)	1-2 months	stool_microbiome_infant	0.000491294	0.000491294	0.0366684	-0.225635	0.298972	0.783383	Higher in SVN
infant_taxa_12	Unknown_Butyricicoccaceae	infant_taxa_12__Unknown_Butyricicoccaceae	Infant Fecal Microbiome (Taxa)	1-2 months	stool_microbiome_infant	0.000491294	0.000491294	0.0366684	-0.225635	0.298972	0.783383	Higher in SVN
infant_taxa_12	Unknown_Butyricicoccaceae.3	infant_taxa_12__Unknown_Butyricicoccaceae.3	Infant Fecal Microbiome (Taxa)	1-2 months	stool_microbiome_infant	0.000491294	0.000491294	0.0366684	-0.225635	0.298972	0.783383	Higher in SVN
infant_taxa_12	CAG.272.sp000433515	infant_taxa_12__CAG.272.sp000433515	Infant Fecal Microbiome (Taxa)	1-2 months	stool_microbiome_infant	0.000491294	0.000491294	0.0366684	-0.225635	0.298972	0.783383	Higher in SVN
infant_taxa_12	CAG.390.sp000437015	infant_taxa_12__CAG.390.sp000437015	Infant Fecal Microbiome (Taxa)	1-2 months	stool_microbiome_infant	0.000491294	0.000491294	0.0366684	-0.225635	0.298972	0.783383	Higher in SVN
infant_taxa_12	Unknown_CAG.390	infant_taxa_12__Unknown_CAG.390	Infant Fecal Microbiome (Taxa)	1-2 months	stool_microbiome_infant	0.000491294	0.000491294	0.0366684	-0.225635	0.298972	0.783383	Higher in SVN
infant_taxa_12	Unknown_CAG.390.1	infant_taxa_12__Unknown_CAG.390.1	Infant Fecal Microbiome (Taxa)	1-2 months	stool_microbiome_infant	0.000491294	0.000491294	0.0366684	-0.225635	0.298972	0.783383	Higher in SVN
infant_taxa_12	Unknown_CAG.724	infant_taxa_12__Unknown_CAG.724	Infant Fecal Microbiome (Taxa)	1-2 months	stool_microbiome_infant	0.000491294	0.000491294	0.0366684	-0.225635	0.298972	0.783383	Higher in SVN
infant_taxa_12	Unknown_CAG.724.1	infant_taxa_12__Unknown_CAG.724.1	Infant Fecal Microbiome (Taxa)	1-2 months	stool_microbiome_infant	0.000491294	0.000491294	0.0366684	-0.225635	0.298972	0.783383	Higher in SVN
infant_taxa_12	CAG.841.sp000437375	infant_taxa_12__CAG.841.sp000437375	Infant Fecal Microbiome (Taxa)	1-2 months	stool_microbiome_infant	0.000491294	0.000491294	0.0366684	-0.225635	0.298972	0.783383	Higher in SVN
infant_taxa_12	CAG.841.sp900544285	infant_taxa_12__CAG.841.sp900544285	Infant Fecal Microbiome (Taxa)	1-2 months	stool_microbiome_infant	0.000491294	0.000491294	0.0366684	-0.225635	0.298972	0.783383	Higher in SVN
infant_taxa_12	Unknown_CAG.841	infant_taxa_12__Unknown_CAG.841	Infant Fecal Microbiome (Taxa)	1-2 months	stool_microbiome_infant	0.000491294	0.000491294	0.0366684	-0.225635	0.298972	0.783383	Higher in SVN
infant_taxa_12	Unknown_Firm.07.1	infant_taxa_12__Unknown_Firm.07.1	Infant Fecal Microbiome (Taxa)	1-2 months	stool_microbiome_infant	0.000491294	0.000491294	0.0366684	-0.225635	0.298972	0.783383	Higher in SVN
infant_taxa_12	Unknown_Firm.07.2	infant_taxa_12__Unknown_Firm.07.2	Infant Fecal Microbiome (Taxa)	1-2 months	stool_microbiome_infant	0.000491294	0.000491294	0.0366684	-0.225635	0.298972	0.783383	Higher in SVN
infant_taxa_12	UBA11512.sp003522145	infant_taxa_12__UBA11512.sp003522145	Infant Fecal Microbiome (Taxa)	1-2 months	stool_microbiome_infant	0.000491294	0.000491294	0.0366684	-0.225635	0.298972	0.783383	Higher in SVN
infant_taxa_12	UBA1740.sp004558975	infant_taxa_12__UBA1740.sp004558975	Infant Fecal Microbiome (Taxa)	1-2 months	stool_microbiome_infant	0.000491294	0.000491294	0.0366684	-0.225635	0.298972	0.783383	Higher in SVN
infant_taxa_12	Unknown_UBA1740	infant_taxa_12__Unknown_UBA1740	Infant Fecal Microbiome (Taxa)	1-2 months	stool_microbiome_infant	0.000491294	0.000491294	0.0366684	-0.225635	0.298972	0.783383	Higher in SVN
infant_taxa_12	Unknown_UBA1740.4	infant_taxa_12__Unknown_UBA1740.4	Infant Fecal Microbiome (Taxa)	1-2 months	stool_microbiome_infant	0.000491294	0.000491294	0.0366684	-0.225635	0.298972	0.783383	Higher in SVN
infant_taxa_12	Unknown_UBA1740.5	infant_taxa_12__Unknown_UBA1740.5	Infant Fecal Microbiome (Taxa)	1-2 months	stool_microbiome_infant	0.000491294	0.000491294	0.0366684	-0.225635	0.298972	0.783383	Higher in SVN
infant_taxa_12	Unknown_UBA1740.6	infant_taxa_12__Unknown_UBA1740.6	Infant Fecal Microbiome (Taxa)	1-2 months	stool_microbiome_infant	0.000491294	0.000491294	0.0366684	-0.225635	0.298972	0.783383	Higher in SVN
infant_taxa_12	Unknown_UMGS1002	infant_taxa_12__Unknown_UMGS1002	Infant Fecal Microbiome (Taxa)	1-2 months	stool_microbiome_infant	0.000491294	0.000491294	0.0366684	-0.225635	0.298972	0.783383	Higher in SVN
infant_taxa_12	Unknown_UMGS1002.1	infant_taxa_12__Unknown_UMGS1002.1	Infant Fecal Microbiome (Taxa)	1-2 months	stool_microbiome_infant	0.000491294	0.000491294	0.0366684	-0.225635	0.298972	0.783383	Higher in SVN
infant_taxa_12	UMGS1225.sp900549725	infant_taxa_12__UMGS1225.sp900549725	Infant Fecal Microbiome (Taxa)	1-2 months	stool_microbiome_infant	0.000491294	0.000491294	0.0366684	-0.225635	0.298972	0.783383	Higher in SVN
infant_taxa_12	UMGS1696.sp900554225	infant_taxa_12__UMGS1696.sp900554225	Infant Fecal Microbiome (Taxa)	1-2 months	stool_microbiome_infant	0.000491294	0.000491294	0.0366684	-0.225635	0.298972	0.783383	Higher in SVN
infant_taxa_12	Unknown_UMGS1696	infant_taxa_12__Unknown_UMGS1696	Infant Fecal Microbiome (Taxa)	1-2 months	stool_microbiome_infant	0.000491294	0.000491294	0.0366684	-0.225635	0.298972	0.783383	Higher in SVN
infant_taxa_12	Unknown_UMGS1696.1	infant_taxa_12__Unknown_UMGS1696.1	Infant Fecal Microbiome (Taxa)	1-2 months	stool_microbiome_infant	0.000491294	0.000491294	0.0366684	-0.225635	0.298972	0.783383	Higher in SVN
infant_taxa_12	Unknown_UMGS1696.2	infant_taxa_12__Unknown_UMGS1696.2	Infant Fecal Microbiome (Taxa)	1-2 months	stool_microbiome_infant	0.000491294	0.000491294	0.0366684	-0.225635	0.298972	0.783383	Higher in SVN
maternal_gene_12	K25920	maternal_gene_12__K25920	Maternal Fecal Metagenome (Genes)	1-2 months	stool_gene_maternal	-0.000490661	0.000490661	-0.0378511	-0.300153	0.22445	0.776579	Lower in SVN
maternal_gene_12	K17068	maternal_gene_12__K17068	Maternal Fecal Metagenome (Genes)	1-2 months	stool_gene_maternal	-0.000488001	0.000488001	-0.249676	-0.510372	0.0110194	0.0604294	Lower in SVN
infant_gene_12	K01915	infant_gene_12__K01915	Infant Fecal Metagenome (Genes)	1-2 months	stool_gene_infant	-0.000486629	0.000486629	-0.0966959	-0.358789	0.165397	0.468301	Lower in SVN
maternal_gene_12	K21673	maternal_gene_12__K21673	Maternal Fecal Metagenome (Genes)	1-2 months	stool_gene_maternal	-0.000485108	0.000485108	-0.223073	-0.484101	0.0379553	0.0936377	Lower in SVN
milk_taxa_1421	Comamonas_F_589250.sp5	milk_taxa_1421__Comamonas_F_589250.sp5	Milk Microbiome (Taxa)	14-21 days	milk_microbiome	0.000481857	0.000481857	-0.257024	-0.517621	0.00357282	0.0532027	Lower in SVN
maternal_taxa_12	Unknown_UBA6414.1	maternal_taxa_12__Unknown_UBA6414.1	Maternal Fecal Microbiome (Taxa)	1-2 months	stool_microbiome_maternal	-0.000480071	0.000480071	0.121716	-0.140233	0.383665	0.361162	Higher in SVN
maternal_gene_12	K02013	maternal_gene_12__K02013	Maternal Fecal Metagenome (Genes)	1-2 months	stool_gene_maternal	-0.000475174	0.000475174	-0.23351	-0.494412	0.027392	0.0791945	Lower in SVN
infant_gene_12	K01866	infant_gene_12__K01866	Infant Fecal Metagenome (Genes)	1-2 months	stool_gene_infant	-0.000473608	0.000473608	-0.0442218	-0.30651	0.218066	0.740227	Lower in SVN
infant_gene_12	K03596	infant_gene_12__K03596	Infant Fecal Metagenome (Genes)	1-2 months	stool_gene_infant	0.000455407	0.000455407	-0.0453155	-0.307601	0.21697	0.734042	Lower in SVN
maternal_gene_12	K03307	maternal_gene_12__K03307	Maternal Fecal Metagenome (Genes)	1-2 months	stool_gene_maternal	-0.000450084	0.000450084	-0.195062	-0.456399	0.066275	0.142885	Lower in SVN
maternal_gene_12	K21839	maternal_gene_12__K21839	Maternal Fecal Metagenome (Genes)	1-2 months	stool_gene_maternal	-0.000437379	0.000437379	-0.282104	-0.542344	-0.0218653	0.0337225	Lower in SVN
milk_bioactive_1421	Leptin	milk_bioactive_1421__Leptin	Milk Bioactive Proteins	14-21 days	bioactive_proteins	0.000422931	0.000422931	-0.123407	-0.385345	0.138532	0.35452	Lower in SVN
maternal_gene_12	K19055	maternal_gene_12__K19055	Maternal Fecal Metagenome (Genes)	1-2 months	stool_gene_maternal	0.000410109	0.000410109	-0.234751	-0.495638	0.0261358	0.0776043	Lower in SVN
maternal_gene_12	K25998	maternal_gene_12__K25998	Maternal Fecal Metagenome (Genes)	1-2 months	stool_gene_maternal	-0.000401505	0.000401505	-0.225156	-0.486159	0.0358476	0.0905986	Lower in SVN
maternal_taxa_12	CAG.95.sp900553305	maternal_taxa_12__CAG.95.sp900553305	Maternal Fecal Microbiome (Taxa)	1-2 months	stool_microbiome_maternal	-0.000388641	0.000388641	-0.0607808	-0.323023	0.201461	0.648575	Lower in SVN
maternal_gene_12	K19857	maternal_gene_12__K19857	Maternal Fecal Metagenome (Genes)	1-2 months	stool_gene_maternal	0.000382119	0.000382119	-0.15928	-0.420951	0.102392	0.231852	Lower in SVN
maternal_taxa_12	UBA1777.sp900549645	maternal_taxa_12__UBA1777.sp900549645	Maternal Fecal Microbiome (Taxa)	1-2 months	stool_microbiome_maternal	-0.000367583	0.000367583	-0.289974	-0.550094	-0.0298543	0.0290279	Lower in SVN
maternal_prot_nav_12	P01701	maternal_prot_nav_12__P01701	Maternal Plasma Proteome (Naive)	1-2 months	prot_nav	0.000362116	0.000362116	0.105824	-0.15622	0.367869	0.427321	Higher in SVN
infant_gene_12	K03584	infant_gene_12__K03584	Infant Fecal Metagenome (Genes)	1-2 months	stool_gene_infant	-0.000357222	0.000357222	-0.0730651	-0.335264	0.189134	0.583762	Lower in SVN
milk_metabolome_1421	rLC_neg_mtb_6057149	milk_metabolome_1421__rLC_neg_mtb_6057149	Milk Metabolome	14-21 days	milk_metabolome	-0.000352485	0.000352485	0.20709	-0.0541199	0.468299	0.119743	Higher in SVN	743.416	446	negative
milk_metabolome_1421	rLC_neg_mtb_1830814	milk_metabolome_1421__rLC_neg_mtb_1830814	Milk Metabolome	14-21 days	milk_metabolome	0.000350549	0.000350549	0.0433945	-0.218895	0.305684	0.744917	Higher in SVN	142.998	134	negative	E1121	C01127;C05946	4-Hydroxy-2-oxoglutarate; 4-Hydroxy-2-oxoglutaric acid$4-Hydroxy-2-oxoglutarate
maternal_gene_12	K01206	maternal_gene_12__K01206	Maternal Fecal Metagenome (Genes)	1-2 months	stool_gene_maternal	0.000343184	0.000343184	-0.171341	-0.432907	0.0902255	0.198305	Lower in SVN
maternal_gene_12	K00262	maternal_gene_12__K00262	Maternal Fecal Metagenome (Genes)	1-2 months	stool_gene_maternal	-0.000339182	0.000339182	-0.168118	-0.429714	0.0934768	0.206901	Lower in SVN
milk_targeted_1421	Ser	milk_targeted_1421__Ser	Milk Targeted Metabolites	14-21 days	targeted_metabolites	-0.000329594	0.000329594	-0.274333	-0.534687	-0.0139792	0.0389774	Lower in SVN
maternal_gene_12	K09022	maternal_gene_12__K09022	Maternal Fecal Metagenome (Genes)	1-2 months	stool_gene_maternal	-0.00031944	0.00031944	-0.172744	-0.434297	0.0888099	0.194645	Lower in SVN
maternal_gene_12	K13553	maternal_gene_12__K13553	Maternal Fecal Metagenome (Genes)	1-2 months	stool_gene_maternal	0.000311016	0.000311016	-0.123755	-0.385691	0.138181	0.353161	Lower in SVN
infant_gene_12	K02990	infant_gene_12__K02990	Infant Fecal Metagenome (Genes)	1-2 months	stool_gene_infant	-0.000297629	0.000297629	-0.0760752	-0.338262	0.186112	0.568351	Lower in SVN
maternal_gene_12	GH20_0	maternal_gene_12__GH20_0	Maternal Fecal Metagenome (Genes)	1-2 months	stool_gene_maternal	0.000295571	0.000295571	-0.111568	-0.373579	0.150444	0.402639	Lower in SVN
infant_gene_12	K02886	infant_gene_12__K02886	Infant Fecal Metagenome (Genes)	1-2 months	stool_gene_infant	-0.000289722	0.000289722	-0.0916414	-0.35376	0.170477	0.491892	Lower in SVN
maternal_gene_12	K03088	maternal_gene_12__K03088	Maternal Fecal Metagenome (Genes)	1-2 months	stool_gene_maternal	-0.000288619	0.000288619	-0.211478	-0.472639	0.049683	0.112067	Lower in SVN
maternal_prot_nav_12	A0A0C4DH25	maternal_prot_nav_12__A0A0C4DH25	Maternal Plasma Proteome (Naive)	1-2 months	prot_nav	-0.00027641	0.00027641	-0.0655234	-0.32775	0.196703	0.623201	Lower in SVN
maternal_taxa_12	Megasphaera.elsdenii	maternal_taxa_12__Megasphaera.elsdenii	Maternal Fecal Microbiome (Taxa)	1-2 months	stool_microbiome_maternal	0.000270862	0.000270862	-0.159206	-0.420879	0.102466	0.232067	Lower in SVN
maternal_gene_12	K00177	maternal_gene_12__K00177	Maternal Fecal Metagenome (Genes)	1-2 months	stool_gene_maternal	0.00025964	0.00025964	-0.268607	-0.529043	-0.00817132	0.0432777	Lower in SVN
infant_gene_12	K18189	infant_gene_12__K18189	Infant Fecal Metagenome (Genes)	1-2 months	stool_gene_infant	-0.000255181	0.000255181	-0.06887	-0.331084	0.193344	0.605558	Lower in SVN
maternal_gene_12	K20765	maternal_gene_12__K20765	Maternal Fecal Metagenome (Genes)	1-2 months	stool_gene_maternal	0.000245187	0.000245187	-0.0692059	-0.331419	0.193007	0.6038	Lower in SVN
infant_gene_12	K01874	infant_gene_12__K01874	Infant Fecal Metagenome (Genes)	1-2 months	stool_gene_infant	0.000242954	0.000242954	-0.0307233	-0.293038	0.231591	0.817831	Lower in SVN
maternal_prot_nav_12	P01704	maternal_prot_nav_12__P01704	Maternal Plasma Proteome (Naive)	1-2 months	prot_nav	0.000241834	0.000241834	0.0692801	-0.192933	0.331493	0.603412	Higher in SVN
maternal_gene_12	K07010	maternal_gene_12__K07010	Maternal Fecal Metagenome (Genes)	1-2 months	stool_gene_maternal	-0.000235	0.000235	-0.0925305	-0.354645	0.169583	0.487697	Lower in SVN
infant_gene_12	K01736	infant_gene_12__K01736	Infant Fecal Metagenome (Genes)	1-2 months	stool_gene_infant	0.000232251	0.000232251	-0.0978318	-0.359919	0.164256	0.463087	Lower in SVN
maternal_gene_12	3003986	maternal_gene_12__3003986	Maternal Fecal Metagenome (Genes)	1-2 months	stool_gene_maternal	0.000221783	0.000221783	-0.10509	-0.367139	0.156959	0.430539	Lower in SVN
infant_gene_12	K02600	infant_gene_12__K02600	Infant Fecal Metagenome (Genes)	1-2 months	stool_gene_infant	-0.000221029	0.000221029	-0.0492698	-0.311545	0.213006	0.711823	Lower in SVN
milk_targeted_1421	PC.ae.C36.5	milk_targeted_1421__PC.ae.C36.5	Milk Targeted Metabolites	14-21 days	targeted_metabolites	-0.000217542	0.000217542	0.107674	-0.15436	0.369708	0.419277	Higher in SVN
maternal_gene_12	K07047	maternal_gene_12__K07047	Maternal Fecal Metagenome (Genes)	1-2 months	stool_gene_maternal	-0.00021301	0.00021301	-0.248738	-0.509446	0.0119705	0.0614084	Lower in SVN
maternal_gene_12	K09815	maternal_gene_12__K09815	Maternal Fecal Metagenome (Genes)	1-2 months	stool_gene_maternal	-0.000211684	0.000211684	-0.287003	-0.547168	-0.0268374	0.0307302	Lower in SVN
infant_gene_12	K02838	infant_gene_12__K02838	Infant Fecal Metagenome (Genes)	1-2 months	stool_gene_infant	0.000206732	0.000206732	-0.0230082	-0.285333	0.239317	0.863051	Lower in SVN
maternal_taxa_12	Unknown_UBA4636.4	maternal_taxa_12__Unknown_UBA4636.4	Maternal Fecal Microbiome (Taxa)	1-2 months	stool_microbiome_maternal	-0.000205019	0.000205019	-0.13593	-0.397783	0.125923	0.307738	Lower in SVN
infant_gene_12	K03589	infant_gene_12__K03589	Infant Fecal Metagenome (Genes)	1-2 months	stool_gene_infant	0.000195765	0.000195765	-0.0057665	-0.268105	0.256572	0.965518	Lower in SVN
maternal_prot_nav_12	P13671	maternal_prot_nav_12__P13671	Maternal Plasma Proteome (Naive)	1-2 months	prot_nav	-0.000193665	0.000193665	-0.133681	-0.39555	0.128188	0.315827	Lower in SVN
infant_gene_12	K02919	infant_gene_12__K02919	Infant Fecal Metagenome (Genes)	1-2 months	stool_gene_infant	0.000184473	0.000184473	-0.0822986	-0.34446	0.179862	0.537115	Lower in SVN
infant_gene_12	K00945	infant_gene_12__K00945	Infant Fecal Metagenome (Genes)	1-2 months	stool_gene_infant	0.00018318	0.00018318	-0.0375937	-0.299896	0.224708	0.778058	Lower in SVN
infant_gene_12	K03664	infant_gene_12__K03664	Infant Fecal Metagenome (Genes)	1-2 months	stool_gene_infant	0.000169842	0.000169842	-0.0188762	-0.281206	0.243454	0.887465	Lower in SVN
maternal_prot_dep_12	P60174	maternal_prot_dep_12__P60174	Maternal Plasma Proteome (Depleted)	1-2 months	prot_dep	0.000168072	0.000168072	0.219285	-0.0417871	0.480358	0.0993714	Higher in SVN
milk_macro_micro_1421	P	milk_macro_micro_1421__P	Milk Macro- and Micronutrients	14-21 days	macro_micronutrients	-0.000162622	0.000162622	0.0886467	-0.173486	0.350779	0.506163	Higher in SVN
infant_gene_12	K01890	infant_gene_12__K01890	Infant Fecal Metagenome (Genes)	1-2 months	stool_gene_infant	0.000158452	0.000158452	0.0211231	-0.241204	0.28345	0.874175	Higher in SVN
infant_gene_12	K02986	infant_gene_12__K02986	Infant Fecal Metagenome (Genes)	1-2 months	stool_gene_infant	-0.000157154	0.000157154	-0.0432343	-0.305524	0.219056	0.745826	Lower in SVN
infant_gene_12	K01867	infant_gene_12__K01867	Infant Fecal Metagenome (Genes)	1-2 months	stool_gene_infant	-0.000154483	0.000154483	-0.0133571	-0.275692	0.248977	0.920236	Lower in SVN
maternal_prot_dep_12	P02652	maternal_prot_dep_12__P02652	Maternal Plasma Proteome (Depleted)	1-2 months	prot_dep	-0.000153003	0.000153003	0.0748298	-0.187362	0.337022	0.574703	Higher in SVN
infant_gene_12	K03527	infant_gene_12__K03527	Infant Fecal Metagenome (Genes)	1-2 months	stool_gene_infant	-0.000152962	0.000152962	-0.0430406	-0.305331	0.21925	0.746927	Lower in SVN
infant_gene_12	K02335	infant_gene_12__K02335	Infant Fecal Metagenome (Genes)	1-2 months	stool_gene_infant	0.000151521	0.000151521	-0.0559713	-0.318228	0.206285	0.674728	Lower in SVN
maternal_gene_12	K03924	maternal_gene_12__K03924	Maternal Fecal Metagenome (Genes)	1-2 months	stool_gene_maternal	-0.000151129	0.000151129	-0.198275	-0.459579	0.0630284	0.136392	Lower in SVN
milk_taxa_1421	Anaerococcus.nagyae.5	milk_taxa_1421__Anaerococcus.nagyae.5	Milk Microbiome (Taxa)	14-21 days	milk_microbiome	-0.000148449	0.000148449	0.00876499	-0.253572	0.271102	0.947609	Higher in SVN
maternal_gene_12	K03666	maternal_gene_12__K03666	Maternal Fecal Metagenome (Genes)	1-2 months	stool_gene_maternal	-0.000144637	0.000144637	-0.322769	-0.582355	-0.063182	0.0149953	Lower in SVN
maternal_prot_nav_12	Q14571	maternal_prot_nav_12__Q14571	Maternal Plasma Proteome (Naive)	1-2 months	prot_nav	-0.00014295	0.00014295	-0.0911396	-0.35326	0.170981	0.494268	Lower in SVN
maternal_gene_12	K01809	maternal_gene_12__K01809	Maternal Fecal Metagenome (Genes)	1-2 months	stool_gene_maternal	0.000142897	0.000142897	-0.0995707	-0.361649	0.162508	0.455167	Lower in SVN
infant_gene_12	K20419	infant_gene_12__K20419	Infant Fecal Metagenome (Genes)	1-2 months	stool_gene_infant	-0.000142554	0.000142554	-0.126393	-0.388312	0.135525	0.342977	Lower in SVN
maternal_prot_dep_12	Q13228	maternal_prot_dep_12__Q13228	Maternal Plasma Proteome (Depleted)	1-2 months	prot_dep	-0.000136284	0.000136284	0.229497	-0.0314546	0.490448	0.0845192	Higher in SVN
maternal_gene_12	K19962	maternal_gene_12__K19962	Maternal Fecal Metagenome (Genes)	1-2 months	stool_gene_maternal	-0.000131109	0.000131109	-0.192607	-0.453969	0.0687555	0.148003	Lower in SVN
maternal_prot_dep_12	P00338	maternal_prot_dep_12__P00338	Maternal Plasma Proteome (Depleted)	1-2 months	prot_dep	0.000127792	0.000127792	0.161582	-0.10007	0.423234	0.225156	Higher in SVN
infant_gene_12	K01885	infant_gene_12__K01885	Infant Fecal Metagenome (Genes)	1-2 months	stool_gene_infant	0.000127384	0.000127384	-0.0623973	-0.324634	0.199839	0.639879	Lower in SVN
maternal_gene_12	K09760	maternal_gene_12__K09760	Maternal Fecal Metagenome (Genes)	1-2 months	stool_gene_maternal	0.000126924	0.000126924	-0.0682726	-0.330489	0.193944	0.608691	Lower in SVN
maternal_gene_12	K20809	maternal_gene_12__K20809	Maternal Fecal Metagenome (Genes)	1-2 months	stool_gene_maternal	0.000119885	0.000119885	-0.210382	-0.471555	0.0507914	0.113948	Lower in SVN
infant_gene_12	K02946	infant_gene_12__K02946	Infant Fecal Metagenome (Genes)	1-2 months	stool_gene_infant	-0.000118853	0.000118853	-0.0438696	-0.306158	0.218419	0.742223	Lower in SVN
infant_gene_12	K03551	infant_gene_12__K03551	Infant Fecal Metagenome (Genes)	1-2 months	stool_gene_infant	-0.000111899	0.000111899	-0.0530003	-0.315266	0.209265	0.691083	Lower in SVN
milk_metabolome_1421	rLC_pos_mtb_203683	milk_metabolome_1421__rLC_pos_mtb_203683	Milk Metabolome	14-21 days	milk_metabolome	-0.000107709	0.000107709	-0.280505	-0.540768	-0.0202416	0.034752	Lower in SVN	366.138	19	positive	E317;E319	CE6229;mn;C00611	13E-tetranor-16-carboxy-LTE4;beta-1,4-mannose-N-acetylglucosamine$N-Acetyllactosamine; beta-D-Galactosyl-1,4-N-acetyl-D-glucosamine; beta-D-Galactosyl-1,4-N-acetyl-beta-D-glucosamine
infant_gene_12	K02887	infant_gene_12__K02887	Infant Fecal Metagenome (Genes)	1-2 months	stool_gene_infant	9.50588e-05	9.50588e-05	-0.084597	-0.346748	0.177554	0.5258	Lower in SVN
maternal_taxa_12	Parolsenella.sp900552935	maternal_taxa_12__Parolsenella.sp900552935	Maternal Fecal Microbiome (Taxa)	1-2 months	stool_microbiome_maternal	9.46303e-05	9.46303e-05	-0.0648331	-0.327062	0.197395	0.626868	Lower in SVN
maternal_gene_12	K02824	maternal_gene_12__K02824	Maternal Fecal Metagenome (Genes)	1-2 months	stool_gene_maternal	9.03345e-05	9.03345e-05	-0.155052	-0.416759	0.106654	0.244508	Lower in SVN
maternal_taxa_12	Unknown_Oscillospiraceae.8	maternal_taxa_12__Unknown_Oscillospiraceae.8	Maternal Fecal Microbiome (Taxa)	1-2 months	stool_microbiome_maternal	8.41516e-05	8.41516e-05	-0.225127	-0.486131	0.0358768	0.0906401	Lower in SVN
infant_gene_12	K02316	infant_gene_12__K02316	Infant Fecal Metagenome (Genes)	1-2 months	stool_gene_infant	-8.29354e-05	8.29354e-05	-0.0327508	-0.295062	0.22956	0.80604	Lower in SVN
milk_targeted_1421	PC.ae.C34.3	milk_targeted_1421__PC.ae.C34.3	Milk Targeted Metabolites	14-21 days	targeted_metabolites	7.45724e-05	7.45724e-05	0.122803	-0.139139	0.384746	0.356882	Higher in SVN
milk_hmo_1421	3'SL_nmol/mL	milk_hmo_1421__3'SL_nmol/mL	Milk HMOs	14-21 days	hmos	-7.25126e-05	7.25126e-05	-0.0609225	-0.323164	0.201319	0.647811	Lower in SVN
milk_targeted_1421	TG.17.0_34.2.	milk_targeted_1421__TG.17.0_34.2.	Milk Targeted Metabolites	14-21 days	targeted_metabolites	6.53094e-05	6.53094e-05	0.0596328	-0.202613	0.321878	0.65478	Higher in SVN
infant_gene_12	K21175	infant_gene_12__K21175	Infant Fecal Metagenome (Genes)	1-2 months	stool_gene_infant	6.40303e-05	6.40303e-05	-0.0668927	-0.329114	0.195329	0.615956	Lower in SVN
maternal_gene_12	K20507	maternal_gene_12__K20507	Maternal Fecal Metagenome (Genes)	1-2 months	stool_gene_maternal	-6.22115e-05	6.22115e-05	-0.210785	-0.471954	0.0503838	0.113253	Lower in SVN
maternal_gene_12	K14047	maternal_gene_12__K14047	Maternal Fecal Metagenome (Genes)	1-2 months	stool_gene_maternal	6.04614e-05	6.04614e-05	-0.132723	-0.394599	0.129152	0.319312	Lower in SVN
milk_taxa_1421	Priestia.sp5	milk_taxa_1421__Priestia.sp5	Milk Microbiome (Taxa)	14-21 days	milk_microbiome	5.45689e-05	5.45689e-05	-0.214501	-0.475629	0.0466256	0.107008	Lower in SVN
milk_taxa_1421	Unclassified.Actinomycetaceae.sp2	milk_taxa_1421__Unclassified.Actinomycetaceae.sp2	Milk Microbiome (Taxa)	14-21 days	milk_microbiome	-5.10908e-05	5.10908e-05	0.105404	-0.156643	0.367451	0.429162	Higher in SVN
maternal_taxa_12	Unknown_CAG.605.3	maternal_taxa_12__Unknown_CAG.605.3	Maternal Fecal Microbiome (Taxa)	1-2 months	stool_microbiome_maternal	-4.06655e-05	4.06655e-05	-0.0401951	-0.302492	0.222101	0.763142	Lower in SVN
milk_taxa_1421	Corynebacterium.dentalis	milk_taxa_1421__Corynebacterium.dentalis	Milk Microbiome (Taxa)	14-21 days	milk_microbiome	3.80906e-05	3.80906e-05	-0.0840044	-0.346158	0.178149	0.528705	Lower in SVN
infant_gene_12	K03685	infant_gene_12__K03685	Infant Fecal Metagenome (Genes)	1-2 months	stool_gene_infant	3.73134e-05	3.73134e-05	-0.0939559	-0.356063	0.168151	0.481012	Lower in SVN
infant_gene_12	K00215	infant_gene_12__K00215	Infant Fecal Metagenome (Genes)	1-2 months	stool_gene_infant	-3.52608e-05	3.52608e-05	-0.0449501	-0.307236	0.217336	0.736107	Lower in SVN
maternal_gene_12	K19699	maternal_gene_12__K19699	Maternal Fecal Metagenome (Genes)	1-2 months	stool_gene_maternal	-2.67538e-05	2.67538e-05	-0.19688	-0.458199	0.0644381	0.139183	Lower in SVN
milk_targeted_1421	PC.aa.C38.3	milk_targeted_1421__PC.aa.C38.3	Milk Targeted Metabolites	14-21 days	targeted_metabolites	2.52832e-05	2.52832e-05	0.205625	-0.0556007	0.46685	0.122395	Higher in SVN
maternal_gene_12	K01662	maternal_gene_12__K01662	Maternal Fecal Metagenome (Genes)	1-2 months	stool_gene_maternal	-2.21743e-05	2.21743e-05	-0.0974079	-0.359498	0.164682	0.465029	Lower in SVN
milk_metabolome_1421	rLC_neg_mtb_4803696	milk_metabolome_1421__rLC_neg_mtb_4803696	Milk Metabolome	14-21 days	milk_metabolome	-2.2078e-05	2.2078e-05	-0.123693	-0.385629	0.138244	0.353404	Lower in SVN	723.428	347	negative
infant_gene_12	K02111	infant_gene_12__K02111	Infant Fecal Metagenome (Genes)	1-2 months	stool_gene_infant	1.84645e-05	1.84645e-05	-0.0162202	-0.278552	0.246112	0.903216	Lower in SVN
maternal_prot_nav_12	P01861	maternal_prot_nav_12__P01861	Maternal Plasma Proteome (Naive)	1-2 months	prot_nav	1.49688e-05	1.49688e-05	-0.158171	-0.419852	0.103509	0.235124	Lower in SVN
maternal_taxa_12	CAG.170.sp900553545	maternal_taxa_12__CAG.170.sp900553545	Maternal Fecal Microbiome (Taxa)	1-2 months	stool_microbiome_maternal	-1.39026e-05	1.39026e-05	-0.364608	-0.62343	-0.105786	0.00592598	Lower in SVN
maternal_prot_dep_12	Q9UGM5	maternal_prot_dep_12__Q9UGM5	Maternal Plasma Proteome (Depleted)	1-2 months	prot_dep	3.19168e-06	3.19168e-06	0.0145677	-0.247766	0.276901	0.913035	Higher in SVN

## Sheet: dWHZ_early_comp2
block	feature	feature_model	block_label	timepoint	block_key	signed_score	score	beta_svn	conf.low	conf.high	p_value	svn_direction	mz	rt	ion_mode	mummi_EID	mummi_compounds	mummi_compound_names
infant_gene_12	K18349	infant_gene_12__K18349	Infant Fecal Metagenome (Genes)	1-2 months	stool_gene_infant	-0.0396136	0.0396136	0.10123	-0.160839	0.3633	0.447679	Higher in SVN
infant_gene_12	3003728	infant_gene_12__3003728	Infant Fecal Metagenome (Genes)	1-2 months	stool_gene_infant	-0.0391871	0.0391871	0.0327432	-0.229568	0.295054	0.806084	Higher in SVN
infant_gene_12	K23981	infant_gene_12__K23981	Infant Fecal Metagenome (Genes)	1-2 months	stool_gene_infant	0.0365223	0.0365223	-0.079453	-0.341626	0.18272	0.55129	Lower in SVN
infant_gene_12	K01953	infant_gene_12__K01953	Infant Fecal Metagenome (Genes)	1-2 months	stool_gene_infant	-0.0361789	0.0361789	0.114399	-0.147596	0.376394	0.39079	Higher in SVN
infant_gene_12	3002937	infant_gene_12__3002937	Infant Fecal Metagenome (Genes)	1-2 months	stool_gene_infant	-0.0360685	0.0360685	-0.0101342	-0.272471	0.252202	0.93944	Lower in SVN
infant_gene_12	K07149	infant_gene_12__K07149	Infant Fecal Metagenome (Genes)	1-2 months	stool_gene_infant	-0.0316465	0.0316465	0.100223	-0.161852	0.362298	0.452214	Higher in SVN
infant_gene_12	3003835	infant_gene_12__3003835	Infant Fecal Metagenome (Genes)	1-2 months	stool_gene_infant	-0.0312746	0.0312746	0.0315306	-0.230782	0.293844	0.813131	Higher in SVN
infant_gene_12	K21471	infant_gene_12__K21471	Infant Fecal Metagenome (Genes)	1-2 months	stool_gene_infant	-0.0302745	0.0302745	-0.167791	-0.429389	0.0938071	0.207789	Lower in SVN
infant_gene_12	K07793	infant_gene_12__K07793	Infant Fecal Metagenome (Genes)	1-2 months	stool_gene_infant	-0.0302472	0.0302472	-0.121324	-0.383276	0.140628	0.362711	Lower in SVN
infant_gene_12	K03615	infant_gene_12__K03615	Infant Fecal Metagenome (Genes)	1-2 months	stool_gene_infant	-0.0278622	0.0278622	0.0177889	-0.244542	0.28012	0.893908	Higher in SVN
infant_gene_12	K03091	infant_gene_12__K03091	Infant Fecal Metagenome (Genes)	1-2 months	stool_gene_infant	-0.027652	0.027652	0.0455152	-0.216769	0.3078	0.732914	Higher in SVN
infant_gene_12	3000026	infant_gene_12__3000026	Infant Fecal Metagenome (Genes)	1-2 months	stool_gene_infant	-0.0261094	0.0261094	0.0702304	-0.191979	0.33244	0.59845	Higher in SVN
infant_gene_12	3002939	infant_gene_12__3002939	Infant Fecal Metagenome (Genes)	1-2 months	stool_gene_infant	-0.0243874	0.0243874	-0.0544406	-0.316702	0.207821	0.683135	Lower in SVN
infant_gene_12	K21395	infant_gene_12__K21395	Infant Fecal Metagenome (Genes)	1-2 months	stool_gene_infant	-0.0234889	0.0234889	-0.131403	-0.393288	0.130482	0.324159	Lower in SVN
infant_gene_12	3003841	infant_gene_12__3003841	Infant Fecal Metagenome (Genes)	1-2 months	stool_gene_infant	-0.0226657	0.0226657	-0.0418837	-0.304177	0.220409	0.753506	Lower in SVN
infant_gene_12	K03315	infant_gene_12__K03315	Infant Fecal Metagenome (Genes)	1-2 months	stool_gene_infant	-0.02241	0.02241	-0.0860035	-0.348148	0.176141	0.518936	Lower in SVN
infant_gene_12	K18354	infant_gene_12__K18354	Infant Fecal Metagenome (Genes)	1-2 months	stool_gene_infant	0.0220933	0.0220933	-0.112303	-0.374311	0.149704	0.399541	Lower in SVN
infant_gene_12	K21394	infant_gene_12__K21394	Infant Fecal Metagenome (Genes)	1-2 months	stool_gene_infant	-0.0214159	0.0214159	-0.101948	-0.364014	0.160118	0.444465	Lower in SVN
infant_gene_12	K07079	infant_gene_12__K07079	Infant Fecal Metagenome (Genes)	1-2 months	stool_gene_infant	-0.0198248	0.0198248	0.0221282	-0.240198	0.284454	0.868241	Higher in SVN
infant_gene_12	K12903	infant_gene_12__K12903	Infant Fecal Metagenome (Genes)	1-2 months	stool_gene_infant	-0.0187815	0.0187815	0.0456524	-0.216632	0.307937	0.73214	Higher in SVN
infant_gene_12	3003583	infant_gene_12__3003583	Infant Fecal Metagenome (Genes)	1-2 months	stool_gene_infant	-0.0184715	0.0184715	-0.0327142	-0.295025	0.229597	0.806253	Lower in SVN
infant_gene_12	K14083	infant_gene_12__K14083	Infant Fecal Metagenome (Genes)	1-2 months	stool_gene_infant	-0.0179443	0.0179443	-0.0993285	-0.361408	0.162751	0.456266	Lower in SVN
infant_gene_12	K10947	infant_gene_12__K10947	Infant Fecal Metagenome (Genes)	1-2 months	stool_gene_infant	-0.0178606	0.0178606	-0.0223561	-0.284682	0.23997	0.866896	Lower in SVN
infant_gene_12	K06400	infant_gene_12__K06400	Infant Fecal Metagenome (Genes)	1-2 months	stool_gene_infant	-0.0176896	0.0176896	-0.063	-0.325235	0.199235	0.636649	Lower in SVN
infant_gene_12	3007188	infant_gene_12__3007188	Infant Fecal Metagenome (Genes)	1-2 months	stool_gene_infant	-0.0161549	0.0161549	-0.0645702	-0.3268	0.197659	0.628266	Lower in SVN
infant_gene_12	K07729	infant_gene_12__K07729	Infant Fecal Metagenome (Genes)	1-2 months	stool_gene_infant	-0.0154884	0.0154884	-0.00954425	-0.271881	0.252792	0.942959	Lower in SVN
infant_gene_12	K23396	infant_gene_12__K23396	Infant Fecal Metagenome (Genes)	1-2 months	stool_gene_infant	0.0136249	0.0136249	-0.129346	-0.391245	0.132553	0.331804	Lower in SVN
infant_gene_12	K20323	infant_gene_12__K20323	Infant Fecal Metagenome (Genes)	1-2 months	stool_gene_infant	0.0132544	0.0132544	0.0100915	-0.252245	0.272428	0.939694	Higher in SVN
infant_gene_12	K21023	infant_gene_12__K21023	Infant Fecal Metagenome (Genes)	1-2 months	stool_gene_infant	-0.0131445	0.0131445	-0.100901	-0.362972	0.161171	0.449161	Lower in SVN
infant_gene_12	K03614	infant_gene_12__K03614	Infant Fecal Metagenome (Genes)	1-2 months	stool_gene_infant	-0.0125969	0.0125969	0.0230136	-0.239312	0.285339	0.863019	Higher in SVN
infant_gene_12	K20339	infant_gene_12__K20339	Infant Fecal Metagenome (Genes)	1-2 months	stool_gene_infant	-0.0118552	0.0118552	0.0337081	-0.228601	0.296017	0.800488	Higher in SVN
infant_gene_12	K11690	infant_gene_12__K11690	Infant Fecal Metagenome (Genes)	1-2 months	stool_gene_infant	-0.0111884	0.0111884	-0.0832424	-0.345399	0.178914	0.532454	Lower in SVN
infant_gene_12	K21838	infant_gene_12__K21838	Infant Fecal Metagenome (Genes)	1-2 months	stool_gene_infant	-0.0109212	0.0109212	-0.0535486	-0.315812	0.208715	0.688053	Lower in SVN
infant_gene_12	K22586	infant_gene_12__K22586	Infant Fecal Metagenome (Genes)	1-2 months	stool_gene_infant	-0.0102995	0.0102995	-0.0609409	-0.323182	0.201301	0.647711	Lower in SVN
infant_gene_12	K18955	infant_gene_12__K18955	Infant Fecal Metagenome (Genes)	1-2 months	stool_gene_infant	0.00980529	0.00980529	-0.222476	-0.483511	0.038559	0.094523	Lower in SVN
infant_gene_12	K07258	infant_gene_12__K07258	Infant Fecal Metagenome (Genes)	1-2 months	stool_gene_infant	-0.00937711	0.00937711	0.0212731	-0.241054	0.2836	0.873288	Higher in SVN
infant_gene_12	K04027	infant_gene_12__K04027	Infant Fecal Metagenome (Genes)	1-2 months	stool_gene_infant	-0.00906384	0.00906384	-0.127993	-0.389901	0.133915	0.336893	Lower in SVN
infant_gene_12	K12904	infant_gene_12__K12904	Infant Fecal Metagenome (Genes)	1-2 months	stool_gene_infant	-0.00753357	0.00753357	-0.0722116	-0.334414	0.18999	0.588167	Lower in SVN
infant_gene_12	K00864	infant_gene_12__K00864	Infant Fecal Metagenome (Genes)	1-2 months	stool_gene_infant	-0.0073393	0.0073393	0.00594075	-0.256397	0.268279	0.964477	Higher in SVN
infant_gene_12	K20507	infant_gene_12__K20507	Infant Fecal Metagenome (Genes)	1-2 months	stool_gene_infant	-0.0072609	0.0072609	-0.0855751	-0.347722	0.176571	0.521022	Lower in SVN
infant_gene_12	K20265	infant_gene_12__K20265	Infant Fecal Metagenome (Genes)	1-2 months	stool_gene_infant	-0.0071282	0.0071282	0.00287141	-0.259467	0.26521	0.982826	Higher in SVN
infant_gene_12	K17051	infant_gene_12__K17051	Infant Fecal Metagenome (Genes)	1-2 months	stool_gene_infant	-0.00689983	0.00689983	-0.0181175	-0.280448	0.244213	0.89196	Lower in SVN
infant_gene_12	K00020	infant_gene_12__K00020	Infant Fecal Metagenome (Genes)	1-2 months	stool_gene_infant	-0.00666956	0.00666956	-0.0739142	-0.33611	0.188281	0.579395	Lower in SVN
infant_gene_12	3002985	infant_gene_12__3002985	Infant Fecal Metagenome (Genes)	1-2 months	stool_gene_infant	-0.00665346	0.00665346	-0.0306899	-0.293004	0.231624	0.818025	Lower in SVN
infant_gene_12	K12901	infant_gene_12__K12901	Infant Fecal Metagenome (Genes)	1-2 months	stool_gene_infant	-0.00661785	0.00661785	-0.0665539	-0.328777	0.195669	0.617745	Lower in SVN
infant_gene_12	K15393	infant_gene_12__K15393	Infant Fecal Metagenome (Genes)	1-2 months	stool_gene_infant	-0.00659169	0.00659169	-0.0232168	-0.285542	0.239108	0.861822	Lower in SVN
infant_gene_12	K17048	infant_gene_12__K17048	Infant Fecal Metagenome (Genes)	1-2 months	stool_gene_infant	-0.00637735	0.00637735	-0.0229909	-0.285316	0.239334	0.863153	Lower in SVN
infant_gene_12	K12693	infant_gene_12__K12693	Infant Fecal Metagenome (Genes)	1-2 months	stool_gene_infant	-0.0057201	0.0057201	-0.00697056	-0.269308	0.255367	0.958324	Lower in SVN
infant_gene_12	K14058	infant_gene_12__K14058	Infant Fecal Metagenome (Genes)	1-2 months	stool_gene_infant	-0.00562741	0.00562741	0.0312895	-0.231024	0.293603	0.814534	Higher in SVN
infant_gene_12	K06518	infant_gene_12__K06518	Infant Fecal Metagenome (Genes)	1-2 months	stool_gene_infant	-0.00543037	0.00543037	-0.0464548	-0.308737	0.215828	0.727617	Lower in SVN
infant_gene_12	K04759	infant_gene_12__K04759	Infant Fecal Metagenome (Genes)	1-2 months	stool_gene_infant	-0.00525509	0.00525509	-0.00899055	-0.271328	0.253346	0.946263	Lower in SVN
infant_gene_12	K22097	infant_gene_12__K22097	Infant Fecal Metagenome (Genes)	1-2 months	stool_gene_infant	-0.00512446	0.00512446	-0.0939549	-0.356062	0.168152	0.481017	Lower in SVN
infant_gene_12	K05394	infant_gene_12__K05394	Infant Fecal Metagenome (Genes)	1-2 months	stool_gene_infant	-0.00497365	0.00497365	-0.0669983	-0.329219	0.195223	0.615398	Lower in SVN
infant_gene_12	K19294	infant_gene_12__K19294	Infant Fecal Metagenome (Genes)	1-2 months	stool_gene_infant	-0.00495348	0.00495348	0.0185963	-0.243734	0.280926	0.889123	Higher in SVN
infant_gene_12	3005008	infant_gene_12__3005008	Infant Fecal Metagenome (Genes)	1-2 months	stool_gene_infant	-0.00493151	0.00493151	-0.122097	-0.384044	0.13985	0.359657	Lower in SVN
infant_gene_12	GH1_0	infant_gene_12__GH1_0	Infant Fecal Metagenome (Genes)	1-2 months	stool_gene_infant	-0.00488857	0.00488857	-0.0154759	-0.277809	0.246857	0.907636	Lower in SVN
infant_gene_12	K21593	infant_gene_12__K21593	Infant Fecal Metagenome (Genes)	1-2 months	stool_gene_infant	-0.00480761	0.00480761	-0.0607382	-0.32298	0.201504	0.648804	Lower in SVN
infant_gene_12	K17194	infant_gene_12__K17194	Infant Fecal Metagenome (Genes)	1-2 months	stool_gene_infant	-0.00475973	0.00475973	-0.012533	-0.274868	0.249802	0.925143	Lower in SVN
infant_gene_12	K17192	infant_gene_12__K17192	Infant Fecal Metagenome (Genes)	1-2 months	stool_gene_infant	-0.00469594	0.00469594	-0.0185746	-0.280905	0.243755	0.889251	Lower in SVN
infant_gene_12	K21071	infant_gene_12__K21071	Infant Fecal Metagenome (Genes)	1-2 months	stool_gene_infant	-0.00452768	0.00452768	0.0586466	-0.203602	0.320895	0.660129	Higher in SVN
infant_gene_12	K01023	infant_gene_12__K01023	Infant Fecal Metagenome (Genes)	1-2 months	stool_gene_infant	-0.00448259	0.00448259	0.0329916	-0.229319	0.295302	0.804642	Higher in SVN
infant_gene_12	K03617	infant_gene_12__K03617	Infant Fecal Metagenome (Genes)	1-2 months	stool_gene_infant	-0.00439225	0.00439225	0.0235198	-0.238805	0.285844	0.860037	Higher in SVN
infant_gene_12	K00058	infant_gene_12__K00058	Infant Fecal Metagenome (Genes)	1-2 months	stool_gene_infant	-0.0043703	0.0043703	-0.0557113	-0.317969	0.206546	0.676153	Lower in SVN
infant_gene_12	K10920	infant_gene_12__K10920	Infant Fecal Metagenome (Genes)	1-2 months	stool_gene_infant	-0.00421659	0.00421659	-0.0212305	-0.283558	0.241097	0.87354	Lower in SVN
infant_gene_12	K07047	infant_gene_12__K07047	Infant Fecal Metagenome (Genes)	1-2 months	stool_gene_infant	-0.00375034	0.00375034	-0.0199752	-0.282304	0.242353	0.88096	Lower in SVN
infant_gene_12	K16965	infant_gene_12__K16965	Infant Fecal Metagenome (Genes)	1-2 months	stool_gene_infant	-0.00366737	0.00366737	-0.0434011	-0.305691	0.218888	0.74488	Lower in SVN
infant_gene_12	K04758	infant_gene_12__K04758	Infant Fecal Metagenome (Genes)	1-2 months	stool_gene_infant	-0.00363831	0.00363831	0.0117291	-0.250606	0.274065	0.929932	Higher in SVN
infant_gene_12	3000816	infant_gene_12__3000816	Infant Fecal Metagenome (Genes)	1-2 months	stool_gene_infant	-0.00340731	0.00340731	-0.118809	-0.380777	0.143158	0.37276	Lower in SVN
infant_gene_12	K01126	infant_gene_12__K01126	Infant Fecal Metagenome (Genes)	1-2 months	stool_gene_infant	-0.00337535	0.00337535	-0.117096	-0.379075	0.144882	0.379702	Lower in SVN
infant_gene_12	K01223	infant_gene_12__K01223	Infant Fecal Metagenome (Genes)	1-2 months	stool_gene_infant	-0.00326526	0.00326526	0.00392447	-0.258414	0.266263	0.976529	Higher in SVN
infant_gene_12	K00093	infant_gene_12__K00093	Infant Fecal Metagenome (Genes)	1-2 months	stool_gene_infant	-0.0031701	0.0031701	-0.0737293	-0.335926	0.188467	0.580345	Lower in SVN
infant_gene_12	K20852	infant_gene_12__K20852	Infant Fecal Metagenome (Genes)	1-2 months	stool_gene_infant	-0.00315589	0.00315589	-0.0114119	-0.273748	0.250924	0.931822	Lower in SVN
infant_gene_12	K02172	infant_gene_12__K02172	Infant Fecal Metagenome (Genes)	1-2 months	stool_gene_infant	-0.00314183	0.00314183	-0.0497982	-0.312072	0.212476	0.708872	Lower in SVN
infant_gene_12	K20506	infant_gene_12__K20506	Infant Fecal Metagenome (Genes)	1-2 months	stool_gene_infant	-0.00294724	0.00294724	-0.0783599	-0.340538	0.183818	0.556784	Lower in SVN
infant_gene_12	K02761	infant_gene_12__K02761	Infant Fecal Metagenome (Genes)	1-2 months	stool_gene_infant	-0.00292162	0.00292162	-0.0467504	-0.309032	0.215531	0.725952	Lower in SVN
infant_gene_12	K01912	infant_gene_12__K01912	Infant Fecal Metagenome (Genes)	1-2 months	stool_gene_infant	-0.00274971	0.00274971	-0.115839	-0.377825	0.146147	0.384848	Lower in SVN
infant_gene_12	K03734	infant_gene_12__K03734	Infant Fecal Metagenome (Genes)	1-2 months	stool_gene_infant	-0.00258264	0.00258264	-0.0320398	-0.294352	0.230272	0.81017	Lower in SVN
infant_gene_12	K25232	infant_gene_12__K25232	Infant Fecal Metagenome (Genes)	1-2 months	stool_gene_infant	-0.00241492	0.00241492	0.0538561	-0.208407	0.316119	0.686356	Higher in SVN
infant_gene_12	K14059	infant_gene_12__K14059	Infant Fecal Metagenome (Genes)	1-2 months	stool_gene_infant	-0.00239151	0.00239151	-0.125842	-0.387765	0.13608	0.345088	Lower in SVN
infant_gene_12	K22092	infant_gene_12__K22092	Infant Fecal Metagenome (Genes)	1-2 months	stool_gene_infant	-0.00219514	0.00219514	-0.000983984	-0.263323	0.261355	0.994114	Lower in SVN
infant_gene_12	3000839	infant_gene_12__3000839	Infant Fecal Metagenome (Genes)	1-2 months	stool_gene_infant	-0.0021308	0.0021308	-0.0758694	-0.338057	0.186318	0.569398	Lower in SVN
infant_gene_12	K06969	infant_gene_12__K06969	Infant Fecal Metagenome (Genes)	1-2 months	stool_gene_infant	-0.00196188	0.00196188	-0.0848147	-0.346965	0.177335	0.524734	Lower in SVN
infant_gene_12	K21179	infant_gene_12__K21179	Infant Fecal Metagenome (Genes)	1-2 months	stool_gene_infant	-0.00168645	0.00168645	-0.128301	-0.390207	0.133605	0.33573	Lower in SVN
infant_gene_12	K14732	infant_gene_12__K14732	Infant Fecal Metagenome (Genes)	1-2 months	stool_gene_infant	-0.00168078	0.00168078	-0.0903194	-0.352444	0.171805	0.498165	Lower in SVN
infant_gene_12	K07053	infant_gene_12__K07053	Infant Fecal Metagenome (Genes)	1-2 months	stool_gene_infant	-0.0016573	0.0016573	-0.0560915	-0.318348	0.206165	0.674069	Lower in SVN
infant_gene_12	K03169	infant_gene_12__K03169	Infant Fecal Metagenome (Genes)	1-2 months	stool_gene_infant	-0.00142584	0.00142584	-0.0176599	-0.279991	0.244671	0.894673	Lower in SVN
infant_gene_12	K13993	infant_gene_12__K13993	Infant Fecal Metagenome (Genes)	1-2 months	stool_gene_infant	-0.00119565	0.00119565	-0.000325662	-0.262665	0.262013	0.998052	Lower in SVN
infant_gene_12	GH109_0	infant_gene_12__GH109_0	Infant Fecal Metagenome (Genes)	1-2 months	stool_gene_infant	-0.00111778	0.00111778	-0.00346513	-0.265804	0.258874	0.979276	Lower in SVN
infant_gene_12	K01990	infant_gene_12__K01990	Infant Fecal Metagenome (Genes)	1-2 months	stool_gene_infant	-0.0009032	0.0009032	-0.0618025	-0.324041	0.200436	0.643073	Lower in SVN
infant_gene_12	K19884	infant_gene_12__K19884	Infant Fecal Metagenome (Genes)	1-2 months	stool_gene_infant	-0.000880615	0.000880615	0.049419	-0.212856	0.311694	0.71099	Higher in SVN
infant_gene_12	K19824	infant_gene_12__K19824	Infant Fecal Metagenome (Genes)	1-2 months	stool_gene_infant	-0.000787118	0.000787118	0.0386735	-0.223626	0.300973	0.771856	Higher in SVN
infant_gene_12	K07307	infant_gene_12__K07307	Infant Fecal Metagenome (Genes)	1-2 months	stool_gene_infant	-0.000718556	0.000718556	-0.0722928	-0.334494	0.189909	0.587748	Lower in SVN
infant_gene_12	K01686	infant_gene_12__K01686	Infant Fecal Metagenome (Genes)	1-2 months	stool_gene_infant	-0.000598002	0.000598002	-0.0848135	-0.346964	0.177336	0.52474	Lower in SVN
infant_gene_12	K07552	infant_gene_12__K07552	Infant Fecal Metagenome (Genes)	1-2 months	stool_gene_infant	0.000490241	0.000490241	0.0210817	-0.241246	0.283409	0.874419	Higher in SVN
infant_gene_12	K01620	infant_gene_12__K01620	Infant Fecal Metagenome (Genes)	1-2 months	stool_gene_infant	-0.000470745	0.000470745	-0.0217919	-0.284119	0.240535	0.870225	Lower in SVN
infant_gene_12	K07816	infant_gene_12__K07816	Infant Fecal Metagenome (Genes)	1-2 months	stool_gene_infant	-0.000449336	0.000449336	0.0593255	-0.202921	0.321572	0.656445	Higher in SVN
infant_gene_12	K03299	infant_gene_12__K03299	Infant Fecal Metagenome (Genes)	1-2 months	stool_gene_infant	-0.00036071	0.00036071	-0.0180882	-0.280419	0.244242	0.892134	Lower in SVN
infant_gene_12	K01625	infant_gene_12__K01625	Infant Fecal Metagenome (Genes)	1-2 months	stool_gene_infant	-0.000302632	0.000302632	0.000211027	-0.262128	0.26255	0.998738	Higher in SVN
infant_gene_12	K20153	infant_gene_12__K20153	Infant Fecal Metagenome (Genes)	1-2 months	stool_gene_infant	-0.000260124	0.000260124	-0.110336	-0.372355	0.151683	0.40786	Lower in SVN
infant_gene_12	K06147	infant_gene_12__K06147	Infant Fecal Metagenome (Genes)	1-2 months	stool_gene_infant	-1.69647e-05	1.69647e-05	0.0314869	-0.230826	0.2938	0.813385	Higher in SVN
infant_taxa_12	Enterobacter.roggenkampii	infant_taxa_12__Enterobacter.roggenkampii	Infant Fecal Microbiome (Taxa)	1-2 months	stool_microbiome_infant	0.106999	0.106999	0.123479	-0.138459	0.385417	0.354237	Higher in SVN
infant_taxa_12	Veillonella.sp900550455	infant_taxa_12__Veillonella.sp900550455	Infant Fecal Microbiome (Taxa)	1-2 months	stool_microbiome_infant	0.0586081	0.0586081	0.0608858	-0.201356	0.323127	0.648008	Higher in SVN
infant_taxa_12	Unknown_Rothia	infant_taxa_12__Unknown_Rothia	Infant Fecal Microbiome (Taxa)	1-2 months	stool_microbiome_infant	0.0444268	0.0444268	0.0347571	-0.22755	0.297064	0.794415	Higher in SVN
infant_taxa_12	Streptococcus.sp900543065	infant_taxa_12__Streptococcus.sp900543065	Infant Fecal Microbiome (Taxa)	1-2 months	stool_microbiome_infant	0.0399295	0.0399295	0.0355888	-0.226717	0.297895	0.78961	Higher in SVN
infant_taxa_12	Limosilactobacillus.gastricus	infant_taxa_12__Limosilactobacillus.gastricus	Infant Fecal Microbiome (Taxa)	1-2 months	stool_microbiome_infant	-0.0295383	0.0295383	0.00490795	-0.257431	0.267246	0.970649	Higher in SVN
infant_taxa_12	Escherichia.fergusonii	infant_taxa_12__Escherichia.fergusonii	Infant Fecal Microbiome (Taxa)	1-2 months	stool_microbiome_infant	-0.0218167	0.0218167	-0.0242031	-0.286527	0.238121	0.856014	Lower in SVN
infant_taxa_12	Lactobacillus.gasseri	infant_taxa_12__Lactobacillus.gasseri	Infant Fecal Microbiome (Taxa)	1-2 months	stool_microbiome_infant	-0.0216345	0.0216345	-0.125081	-0.387009	0.136847	0.34802	Lower in SVN
infant_taxa_12	Flavonifractor.plautii	infant_taxa_12__Flavonifractor.plautii	Infant Fecal Microbiome (Taxa)	1-2 months	stool_microbiome_infant	-0.0215648	0.0215648	-0.0626086	-0.324845	0.199627	0.638746	Lower in SVN
infant_taxa_12	Campylobacter_A.curvus	infant_taxa_12__Campylobacter_A.curvus	Infant Fecal Microbiome (Taxa)	1-2 months	stool_microbiome_infant	0.0194305	0.0194305	0.216897	-0.0442028	0.477997	0.103128	Higher in SVN
infant_taxa_12	Bacteroides.fragilis	infant_taxa_12__Bacteroides.fragilis	Infant Fecal Microbiome (Taxa)	1-2 months	stool_microbiome_infant	0.019372	0.019372	0.103157	-0.158902	0.365217	0.439074	Higher in SVN
infant_taxa_12	Bilophila.wadsworthia	infant_taxa_12__Bilophila.wadsworthia	Infant Fecal Microbiome (Taxa)	1-2 months	stool_microbiome_infant	-0.0192002	0.0192002	-0.127953	-0.389862	0.133955	0.337045	Lower in SVN
infant_taxa_12	Agathobaculum.sp900555465	infant_taxa_12__Agathobaculum.sp900555465	Infant Fecal Microbiome (Taxa)	1-2 months	stool_microbiome_infant	-0.0191428	0.0191428	-0.142015	-0.403824	0.119793	0.286545	Lower in SVN
infant_taxa_12	Eubacterium.callanderi	infant_taxa_12__Eubacterium.callanderi	Infant Fecal Microbiome (Taxa)	1-2 months	stool_microbiome_infant	-0.0184751	0.0184751	-0.0680677	-0.330285	0.19415	0.609768	Lower in SVN
infant_taxa_12	Unknown_Veillonella.10	infant_taxa_12__Unknown_Veillonella.10	Infant Fecal Microbiome (Taxa)	1-2 months	stool_microbiome_infant	0.0182588	0.0182588	-0.0683626	-0.330579	0.193854	0.608219	Lower in SVN
infant_taxa_12	Massiliomicrobiota.sp002160815	infant_taxa_12__Massiliomicrobiota.sp002160815	Infant Fecal Microbiome (Taxa)	1-2 months	stool_microbiome_infant	-0.0166495	0.0166495	-0.0811375	-0.343304	0.181028	0.542877	Lower in SVN
infant_taxa_12	Unknown_Mediterraneibacter.1	infant_taxa_12__Unknown_Mediterraneibacter.1	Infant Fecal Microbiome (Taxa)	1-2 months	stool_microbiome_infant	-0.016649	0.016649	-0.0811392	-0.343305	0.181027	0.542868	Lower in SVN
infant_taxa_12	Clostridium.paraputrificum	infant_taxa_12__Clostridium.paraputrificum	Infant Fecal Microbiome (Taxa)	1-2 months	stool_microbiome_infant	-0.0166266	0.0166266	0.219172	-0.0419016	0.480246	0.099547	Higher in SVN
infant_taxa_12	Longicatena.innocuum	infant_taxa_12__Longicatena.innocuum	Infant Fecal Microbiome (Taxa)	1-2 months	stool_microbiome_infant	-0.0166235	0.0166235	-0.0812344	-0.3434	0.180931	0.542395	Lower in SVN
infant_taxa_12	Phascolarctobacterium_A.succinatutens	infant_taxa_12__Phascolarctobacterium_A.succinatutens	Infant Fecal Microbiome (Taxa)	1-2 months	stool_microbiome_infant	-0.01662	0.01662	-0.0812473	-0.343413	0.180918	0.54233	Lower in SVN
infant_taxa_12	Dorea.faecis	infant_taxa_12__Dorea.faecis	Infant Fecal Microbiome (Taxa)	1-2 months	stool_microbiome_infant	-0.0166115	0.0166115	-0.0812785	-0.343444	0.180887	0.542175	Lower in SVN
infant_taxa_12	Phascolarctobacterium_A.succinatutens.1	infant_taxa_12__Phascolarctobacterium_A.succinatutens.1	Infant Fecal Microbiome (Taxa)	1-2 months	stool_microbiome_infant	-0.0166093	0.0166093	-0.0812865	-0.343452	0.180879	0.542136	Lower in SVN
infant_taxa_12	Dorea.phocaeensis	infant_taxa_12__Dorea.phocaeensis	Infant Fecal Microbiome (Taxa)	1-2 months	stool_microbiome_infant	-0.0166072	0.0166072	-0.0812943	-0.34346	0.180871	0.542097	Lower in SVN
infant_taxa_12	Mediterraneibacter.sp900555215	infant_taxa_12__Mediterraneibacter.sp900555215	Infant Fecal Microbiome (Taxa)	1-2 months	stool_microbiome_infant	-0.0165742	0.0165742	-0.0814116	-0.343576	0.180753	0.541514	Lower in SVN
infant_taxa_12	Unknown_Sutterella.3	infant_taxa_12__Unknown_Sutterella.3	Infant Fecal Microbiome (Taxa)	1-2 months	stool_microbiome_infant	-0.0165547	0.0165547	-0.115832	-0.377818	0.146154	0.384875	Lower in SVN
infant_taxa_12	Anaerotignum.lactatifermentans	infant_taxa_12__Anaerotignum.lactatifermentans	Infant Fecal Microbiome (Taxa)	1-2 months	stool_microbiome_infant	-0.016548	0.016548	-0.0815021	-0.343667	0.180662	0.541064	Lower in SVN
infant_taxa_12	Prevotella.sp000436035	infant_taxa_12__Prevotella.sp000436035	Infant Fecal Microbiome (Taxa)	1-2 months	stool_microbiome_infant	-0.016542	0.016542	-0.0815224	-0.343687	0.180642	0.540963	Lower in SVN
infant_taxa_12	Salmonella.enterica	infant_taxa_12__Salmonella.enterica	Infant Fecal Microbiome (Taxa)	1-2 months	stool_microbiome_infant	-0.0164545	0.0164545	-0.044229	-0.306517	0.218059	0.740187	Lower in SVN
infant_taxa_12	Enterococcus_A.avium	infant_taxa_12__Enterococcus_A.avium	Infant Fecal Microbiome (Taxa)	1-2 months	stool_microbiome_infant	-0.0159261	0.0159261	0.146494	-0.11528	0.408269	0.271588	Higher in SVN
infant_taxa_12	Erysipelatoclostridium.sp002160495	infant_taxa_12__Erysipelatoclostridium.sp002160495	Infant Fecal Microbiome (Taxa)	1-2 months	stool_microbiome_infant	-0.0152643	0.0152643	-0.00618579	-0.268524	0.256152	0.963013	Lower in SVN
infant_taxa_12	Proteus.mirabilis	infant_taxa_12__Proteus.mirabilis	Infant Fecal Microbiome (Taxa)	1-2 months	stool_microbiome_infant	-0.01183	0.01183	-0.0637683	-0.326001	0.198464	0.632541	Lower in SVN
infant_taxa_12	Campylobacter_D.upsaliensis	infant_taxa_12__Campylobacter_D.upsaliensis	Infant Fecal Microbiome (Taxa)	1-2 months	stool_microbiome_infant	0.011145	0.011145	-0.114651	-0.376644	0.147343	0.389749	Lower in SVN
infant_taxa_12	Butyricicoccus.pullicaecorum	infant_taxa_12__Butyricicoccus.pullicaecorum	Infant Fecal Microbiome (Taxa)	1-2 months	stool_microbiome_infant	-0.0105937	0.0105937	-0.113684	-0.375683	0.148315	0.393762	Lower in SVN
infant_taxa_12	Eggerthella.lenta	infant_taxa_12__Eggerthella.lenta	Infant Fecal Microbiome (Taxa)	1-2 months	stool_microbiome_infant	-0.0101442	0.0101442	-0.107473	-0.369508	0.154563	0.420149	Lower in SVN
infant_taxa_12	Bacteroides.thetaiotaomicron	infant_taxa_12__Bacteroides.thetaiotaomicron	Infant Fecal Microbiome (Taxa)	1-2 months	stool_microbiome_infant	-0.00864876	0.00864876	-0.0788221	-0.340998	0.183354	0.554458	Lower in SVN
infant_taxa_12	Megamonas.funiformis	infant_taxa_12__Megamonas.funiformis	Infant Fecal Microbiome (Taxa)	1-2 months	stool_microbiome_infant	0.00803066	0.00803066	0.217438	-0.0436554	0.478532	0.102267	Higher in SVN
infant_taxa_12	Bacteroides.congonensis	infant_taxa_12__Bacteroides.congonensis	Infant Fecal Microbiome (Taxa)	1-2 months	stool_microbiome_infant	0.00802757	0.00802757	0.302834	0.0429162	0.562752	0.0225598	Higher in SVN
infant_taxa_12	Bifidobacterium.catenulatum	infant_taxa_12__Bifidobacterium.catenulatum	Infant Fecal Microbiome (Taxa)	1-2 months	stool_microbiome_infant	0.0080108	0.0080108	0.0987977	-0.163285	0.36088	0.458679	Higher in SVN
infant_taxa_12	Bifidobacterium.sp002742445	infant_taxa_12__Bifidobacterium.sp002742445	Infant Fecal Microbiome (Taxa)	1-2 months	stool_microbiome_infant	0.00801036	0.00801036	0.0960777	-0.166019	0.358174	0.471153	Higher in SVN
infant_taxa_12	Bifidobacterium.kashiwanohense_A	infant_taxa_12__Bifidobacterium.kashiwanohense_A	Infant Fecal Microbiome (Taxa)	1-2 months	stool_microbiome_infant	0.00800797	0.00800797	0.0963868	-0.165708	0.358482	0.469726	Higher in SVN
infant_taxa_12	Veillonella_A.seminalis	infant_taxa_12__Veillonella_A.seminalis	Infant Fecal Microbiome (Taxa)	1-2 months	stool_microbiome_infant	0.00787678	0.00787678	0.0553642	-0.206894	0.317623	0.678058	Higher in SVN
infant_taxa_12	Unknown_CAG.274	infant_taxa_12__Unknown_CAG.274	Infant Fecal Microbiome (Taxa)	1-2 months	stool_microbiome_infant	-0.00767875	0.00767875	-0.117369	-0.379346	0.144608	0.378591	Lower in SVN
infant_taxa_12	Streptococcus.sp000187445	infant_taxa_12__Streptococcus.sp000187445	Infant Fecal Microbiome (Taxa)	1-2 months	stool_microbiome_infant	0.00756379	0.00756379	-0.0561361	-0.318392	0.20612	0.673824	Lower in SVN
infant_taxa_12	Bifidobacterium.longum	infant_taxa_12__Bifidobacterium.longum	Infant Fecal Microbiome (Taxa)	1-2 months	stool_microbiome_infant	0.0073363	0.0073363	-0.128975	-0.390877	0.132926	0.333192	Lower in SVN
infant_taxa_12	Erysipelatoclostridium.ramosum	infant_taxa_12__Erysipelatoclostridium.ramosum	Infant Fecal Microbiome (Taxa)	1-2 months	stool_microbiome_infant	-0.00682056	0.00682056	0.0243199	-0.238004	0.286643	0.855327	Higher in SVN
infant_taxa_12	Parolsenella.sp900549525	infant_taxa_12__Parolsenella.sp900549525	Infant Fecal Microbiome (Taxa)	1-2 months	stool_microbiome_infant	0.00666685	0.00666685	-0.0812927	-0.343458	0.180873	0.542105	Lower in SVN
infant_taxa_12	Bacteroides.caccae	infant_taxa_12__Bacteroides.caccae	Infant Fecal Microbiome (Taxa)	1-2 months	stool_microbiome_infant	0.0066623	0.0066623	-0.141668	-0.403479	0.120143	0.287726	Lower in SVN
infant_taxa_12	Prevotella.sp002265625	infant_taxa_12__Prevotella.sp002265625	Infant Fecal Microbiome (Taxa)	1-2 months	stool_microbiome_infant	0.00664623	0.00664623	-0.0814443	-0.343609	0.18072	0.541351	Lower in SVN
infant_taxa_12	Limosilactobacillus.vaginalis	infant_taxa_12__Limosilactobacillus.vaginalis	Infant Fecal Microbiome (Taxa)	1-2 months	stool_microbiome_infant	-0.00647381	0.00647381	0.0577591	-0.204492	0.32001	0.664958	Higher in SVN
infant_taxa_12	Unknown_Pauljensenia	infant_taxa_12__Unknown_Pauljensenia	Infant Fecal Microbiome (Taxa)	1-2 months	stool_microbiome_infant	0.00565196	0.00565196	-0.11672	-0.378701	0.145261	0.381237	Lower in SVN
infant_taxa_12	Veillonella_A.sp000431435	infant_taxa_12__Veillonella_A.sp000431435	Infant Fecal Microbiome (Taxa)	1-2 months	stool_microbiome_infant	-0.0055462	0.0055462	-0.242393	-0.503183	0.0183974	0.0683724	Lower in SVN
infant_taxa_12	Megasphaera.sp001546855	infant_taxa_12__Megasphaera.sp001546855	Infant Fecal Microbiome (Taxa)	1-2 months	stool_microbiome_infant	0.0054464	0.0054464	-0.0226554	-0.284981	0.23967	0.865131	Lower in SVN
infant_taxa_12	Ruminococcus_B.gnavus	infant_taxa_12__Ruminococcus_B.gnavus	Infant Fecal Microbiome (Taxa)	1-2 months	stool_microbiome_infant	-0.00486741	0.00486741	0.144015	-0.117779	0.405808	0.2798	Higher in SVN
infant_taxa_12	Limosilactobacillus.oris	infant_taxa_12__Limosilactobacillus.oris	Infant Fecal Microbiome (Taxa)	1-2 months	stool_microbiome_infant	0.00462563	0.00462563	0.156351	-0.105344	0.418047	0.240568	Higher in SVN
infant_taxa_12	Bacteroides.fragilis_A	infant_taxa_12__Bacteroides.fragilis_A	Infant Fecal Microbiome (Taxa)	1-2 months	stool_microbiome_infant	-0.00451968	0.00451968	-0.117742	-0.379716	0.144233	0.377078	Lower in SVN
infant_taxa_12	Bacteroides.xylanisolvens	infant_taxa_12__Bacteroides.xylanisolvens	Infant Fecal Microbiome (Taxa)	1-2 months	stool_microbiome_infant	0.00429177	0.00429177	-0.115406	-0.377395	0.146583	0.386628	Lower in SVN
infant_taxa_12	Phocaeicola.sp000434735	infant_taxa_12__Phocaeicola.sp000434735	Infant Fecal Microbiome (Taxa)	1-2 months	stool_microbiome_infant	-0.00409925	0.00409925	0.0127903	-0.249544	0.275125	0.923611	Higher in SVN
infant_taxa_12	Citrobacter_A.amalonaticus	infant_taxa_12__Citrobacter_A.amalonaticus	Infant Fecal Microbiome (Taxa)	1-2 months	stool_microbiome_infant	-0.00398725	0.00398725	-0.0808739	-0.343041	0.181293	0.544189	Lower in SVN
infant_taxa_12	Dysgonomonas.gadei	infant_taxa_12__Dysgonomonas.gadei	Infant Fecal Microbiome (Taxa)	1-2 months	stool_microbiome_infant	-0.00398619	0.00398619	-0.0806708	-0.342839	0.181497	0.545201	Lower in SVN
infant_taxa_12	Parabacteroides.distasonis	infant_taxa_12__Parabacteroides.distasonis	Infant Fecal Microbiome (Taxa)	1-2 months	stool_microbiome_infant	-0.00341033	0.00341033	0.0485972	-0.21368	0.310874	0.715586	Higher in SVN
infant_taxa_12	Campylobacter_D.jejuni	infant_taxa_12__Campylobacter_D.jejuni	Infant Fecal Microbiome (Taxa)	1-2 months	stool_microbiome_infant	0.00304075	0.00304075	-0.0116859	-0.274021	0.25065	0.930189	Lower in SVN
infant_taxa_12	Sutterella.wadsworthensis	infant_taxa_12__Sutterella.wadsworthensis	Infant Fecal Microbiome (Taxa)	1-2 months	stool_microbiome_infant	-0.00300142	0.00300142	0.0128613	-0.249473	0.275196	0.923188	Higher in SVN
infant_taxa_12	Unknown_Lachnospiraceae.3	infant_taxa_12__Unknown_Lachnospiraceae.3	Infant Fecal Microbiome (Taxa)	1-2 months	stool_microbiome_infant	-0.00292367	0.00292367	-0.11436	-0.376355	0.147635	0.390952	Lower in SVN
infant_taxa_12	Dialister.sp000434475	infant_taxa_12__Dialister.sp000434475	Infant Fecal Microbiome (Taxa)	1-2 months	stool_microbiome_infant	0.00283021	0.00283021	0.110123	-0.151898	0.372143	0.408767	Higher in SVN
infant_taxa_12	Megasphaera_B.hexanoica	infant_taxa_12__Megasphaera_B.hexanoica	Infant Fecal Microbiome (Taxa)	1-2 months	stool_microbiome_infant	-0.00270357	0.00270357	-0.0812619	-0.343427	0.180904	0.542258	Lower in SVN
infant_taxa_12	Sellimonas.intestinalis	infant_taxa_12__Sellimonas.intestinalis	Infant Fecal Microbiome (Taxa)	1-2 months	stool_microbiome_infant	-0.0026971	0.0026971	-0.0813465	-0.343512	0.180819	0.541838	Lower in SVN
infant_taxa_12	Hungatella.effluvii	infant_taxa_12__Hungatella.effluvii	Infant Fecal Microbiome (Taxa)	1-2 months	stool_microbiome_infant	-0.0026947	0.0026947	-0.115219	-0.377209	0.146771	0.387397	Lower in SVN
infant_taxa_12	Alistipes_A.sp900240235	infant_taxa_12__Alistipes_A.sp900240235	Infant Fecal Microbiome (Taxa)	1-2 months	stool_microbiome_infant	-0.00269309	0.00269309	-0.0813978	-0.343563	0.180767	0.541582	Lower in SVN
infant_taxa_12	Phascolarctobacterium.faecium	infant_taxa_12__Phascolarctobacterium.faecium	Infant Fecal Microbiome (Taxa)	1-2 months	stool_microbiome_infant	-0.00269256	0.00269256	0.0937195	-0.168389	0.355828	0.482117	Higher in SVN
infant_taxa_12	Christensenella.minuta	infant_taxa_12__Christensenella.minuta	Infant Fecal Microbiome (Taxa)	1-2 months	stool_microbiome_infant	-0.0026912	0.0026912	-0.0814217	-0.343586	0.180743	0.541464	Lower in SVN
infant_taxa_12	Megasphaera.sp002319965	infant_taxa_12__Megasphaera.sp002319965	Infant Fecal Microbiome (Taxa)	1-2 months	stool_microbiome_infant	-0.00268896	0.00268896	0.118232	-0.14374	0.380203	0.375091	Higher in SVN
infant_taxa_12	Megasphaera.sp000417505	infant_taxa_12__Megasphaera.sp000417505	Infant Fecal Microbiome (Taxa)	1-2 months	stool_microbiome_infant	-0.00268584	0.00268584	-0.115511	-0.377499	0.146478	0.386198	Lower in SVN
infant_taxa_12	Megasphaera.massiliensis	infant_taxa_12__Megasphaera.massiliensis	Infant Fecal Microbiome (Taxa)	1-2 months	stool_microbiome_infant	-0.00268296	0.00268296	0.123598	-0.138339	0.385535	0.353774	Higher in SVN
infant_taxa_12	Clostridium_Q.symbiosum	infant_taxa_12__Clostridium_Q.symbiosum	Infant Fecal Microbiome (Taxa)	1-2 months	stool_microbiome_infant	-0.00267604	0.00267604	-0.081607	-0.343771	0.180557	0.540543	Lower in SVN
infant_taxa_12	Senegalimassilia.anaerobia	infant_taxa_12__Senegalimassilia.anaerobia	Infant Fecal Microbiome (Taxa)	1-2 months	stool_microbiome_infant	-0.00229495	0.00229495	-0.141839	-0.403649	0.119971	0.287144	Lower in SVN
infant_taxa_12	Alistipes_A.indistinctus	infant_taxa_12__Alistipes_A.indistinctus	Infant Fecal Microbiome (Taxa)	1-2 months	stool_microbiome_infant	-0.0020978	0.0020978	-0.115855	-0.377841	0.146131	0.384781	Lower in SVN
infant_taxa_12	Streptococcus.mitis_D	infant_taxa_12__Streptococcus.mitis_D	Infant Fecal Microbiome (Taxa)	1-2 months	stool_microbiome_infant	0.00204062	0.00204062	-0.116056	-0.378041	0.145929	0.383955	Lower in SVN
infant_taxa_12	Unknown_Streptococcus.7	infant_taxa_12__Unknown_Streptococcus.7	Infant Fecal Microbiome (Taxa)	1-2 months	stool_microbiome_infant	0.00199908	0.00199908	-0.116136	-0.378121	0.145848	0.383627	Lower in SVN
infant_taxa_12	Phocaeicola.dorei	infant_taxa_12__Phocaeicola.dorei	Infant Fecal Microbiome (Taxa)	1-2 months	stool_microbiome_infant	-0.00195809	0.00195809	-0.18481	-0.44625	0.0766299	0.165181	Lower in SVN
infant_taxa_12	Ureaplasma.sp900544585	infant_taxa_12__Ureaplasma.sp900544585	Infant Fecal Microbiome (Taxa)	1-2 months	stool_microbiome_infant	-0.00152918	0.00152918	-0.0808769	-0.343044	0.18129	0.544174	Lower in SVN
infant_taxa_12	Unknown_Streptococcus.1	infant_taxa_12__Unknown_Streptococcus.1	Infant Fecal Microbiome (Taxa)	1-2 months	stool_microbiome_infant	0.00148136	0.00148136	-0.115502	-0.37749	0.146486	0.386232	Lower in SVN
infant_taxa_12	Citrobacter.werkmanii	infant_taxa_12__Citrobacter.werkmanii	Infant Fecal Microbiome (Taxa)	1-2 months	stool_microbiome_infant	0.00124455	0.00124455	-0.114599	-0.376592	0.147395	0.389963	Lower in SVN
infant_taxa_12	Dysgonomonas.capnocytophagoides	infant_taxa_12__Dysgonomonas.capnocytophagoides	Infant Fecal Microbiome (Taxa)	1-2 months	stool_microbiome_infant	0.00122083	0.00122083	-0.0808178	-0.342985	0.18135	0.544468	Lower in SVN
infant_taxa_12	Klebsiella.quasipneumoniae	infant_taxa_12__Klebsiella.quasipneumoniae	Infant Fecal Microbiome (Taxa)	1-2 months	stool_microbiome_infant	-0.00116335	0.00116335	-0.0616699	-0.323909	0.200569	0.643786	Lower in SVN
infant_taxa_12	Enterocloster.sp900541315	infant_taxa_12__Enterocloster.sp900541315	Infant Fecal Microbiome (Taxa)	1-2 months	stool_microbiome_infant	-0.00115749	0.00115749	-0.0262234	-0.288544	0.236098	0.844143	Lower in SVN
infant_taxa_12	Parolsenella.uli_B	infant_taxa_12__Parolsenella.uli_B	Infant Fecal Microbiome (Taxa)	1-2 months	stool_microbiome_infant	-0.00109556	0.00109556	-0.0824303	-0.344591	0.17973	0.536463	Lower in SVN
infant_taxa_12	Prevotella.melaninogenica	infant_taxa_12__Prevotella.melaninogenica	Infant Fecal Microbiome (Taxa)	1-2 months	stool_microbiome_infant	0.00107611	0.00107611	-0.0812376	-0.343403	0.180928	0.542379	Lower in SVN
infant_taxa_12	Limosilactobacillus.fermentum	infant_taxa_12__Limosilactobacillus.fermentum	Infant Fecal Microbiome (Taxa)	1-2 months	stool_microbiome_infant	-0.000834525	0.000834525	0.0713893	-0.190816	0.333594	0.592425	Higher in SVN
infant_taxa_12	Veillonella.parvula	infant_taxa_12__Veillonella.parvula	Infant Fecal Microbiome (Taxa)	1-2 months	stool_microbiome_infant	-0.000592944	0.000592944	0.0235305	-0.238794	0.285855	0.859974	Higher in SVN
infant_taxa_12	Prevotella.sp900551275	infant_taxa_12__Prevotella.sp900551275	Infant Fecal Microbiome (Taxa)	1-2 months	stool_microbiome_infant	-0.000589593	0.000589593	0.120513	-0.141444	0.38247	0.365934	Higher in SVN
infant_taxa_12	Bifidobacterium.infantis	infant_taxa_12__Bifidobacterium.infantis	Infant Fecal Microbiome (Taxa)	1-2 months	stool_microbiome_infant	0.000549028	0.000549028	-0.0730745	-0.335273	0.189124	0.583714	Lower in SVN
infant_taxa_12	Lacticaseibacillus.rhamnosus	infant_taxa_12__Lacticaseibacillus.rhamnosus	Infant Fecal Microbiome (Taxa)	1-2 months	stool_microbiome_infant	-0.000514193	0.000514193	-0.00674451	-0.269082	0.255593	0.959675	Lower in SVN
infant_taxa_12	Pauljensenia.sp900541895	infant_taxa_12__Pauljensenia.sp900541895	Infant Fecal Microbiome (Taxa)	1-2 months	stool_microbiome_infant	0.000427556	0.000427556	-0.224863	-0.48587	0.0361438	0.0910208	Lower in SVN
infant_taxa_12	Klebsiella.variicola	infant_taxa_12__Klebsiella.variicola	Infant Fecal Microbiome (Taxa)	1-2 months	stool_microbiome_infant	0.000278359	0.000278359	-0.14139	-0.403203	0.120423	0.288676	Lower in SVN
infant_taxa_12	Enterobacter.cloacae	infant_taxa_12__Enterobacter.cloacae	Infant Fecal Microbiome (Taxa)	1-2 months	stool_microbiome_infant	0.000278049	0.000278049	0.104696	-0.157355	0.366747	0.43227	Higher in SVN
infant_taxa_12	Anaeroglobus.sp900240295	infant_taxa_12__Anaeroglobus.sp900240295	Infant Fecal Microbiome (Taxa)	1-2 months	stool_microbiome_infant	0.000219407	0.000219407	-0.115128	-0.377119	0.146862	0.387773	Lower in SVN
infant_taxa_12	Dialister.sp900543455	infant_taxa_12__Dialister.sp900543455	Infant Fecal Microbiome (Taxa)	1-2 months	stool_microbiome_infant	0.00021703	0.00021703	0.022259	-0.240067	0.284585	0.867469	Higher in SVN
infant_taxa_12	Schleiferilactobacillus.harbinensis	infant_taxa_12__Schleiferilactobacillus.harbinensis	Infant Fecal Microbiome (Taxa)	1-2 months	stool_microbiome_infant	0.000214307	0.000214307	0.0278562	-0.234463	0.290175	0.834574	Higher in SVN
infant_taxa_12	Megasphaera_B.sp003467125	infant_taxa_12__Megasphaera_B.sp003467125	Infant Fecal Microbiome (Taxa)	1-2 months	stool_microbiome_infant	0.00021251	0.00021251	-0.0813176	-0.343483	0.180848	0.541981	Lower in SVN
infant_taxa_12	Bifidobacterium.bifidum	infant_taxa_12__Bifidobacterium.bifidum	Infant Fecal Microbiome (Taxa)	1-2 months	stool_microbiome_infant	3.79057e-05	3.79057e-05	-0.125822	-0.387745	0.136101	0.345167	Lower in SVN
infant_taxa_12	Parolsenella.sp900552935	infant_taxa_12__Parolsenella.sp900552935	Infant Fecal Microbiome (Taxa)	1-2 months	stool_microbiome_infant	1.36408e-05	1.36408e-05	0.126202	-0.135718	0.388122	0.343708	Higher in SVN
maternal_gene_12	GH163_0	maternal_gene_12__GH163_0	Maternal Fecal Metagenome (Genes)	1-2 months	stool_gene_maternal	-0.0370326	0.0370326	-0.219079	-0.480154	0.0419955	0.0996911	Lower in SVN
maternal_gene_12	K17320	maternal_gene_12__K17320	Maternal Fecal Metagenome (Genes)	1-2 months	stool_gene_maternal	-0.0217561	0.0217561	-0.208912	-0.470102	0.0522776	0.116508	Lower in SVN
maternal_gene_12	K07321	maternal_gene_12__K07321	Maternal Fecal Metagenome (Genes)	1-2 months	stool_gene_maternal	-0.0205613	0.0205613	-0.323219	-0.582798	-0.06364	0.0148539	Lower in SVN
maternal_gene_12	K20741	maternal_gene_12__K20741	Maternal Fecal Metagenome (Genes)	1-2 months	stool_gene_maternal	0.0202948	0.0202948	0.185032	-0.0764054	0.44647	0.164672	Higher in SVN
maternal_gene_12	K17318	maternal_gene_12__K17318	Maternal Fecal Metagenome (Genes)	1-2 months	stool_gene_maternal	-0.0184546	0.0184546	-0.222277	-0.483315	0.0387601	0.0948194	Lower in SVN
maternal_gene_12	K17319	maternal_gene_12__K17319	Maternal Fecal Metagenome (Genes)	1-2 months	stool_gene_maternal	-0.015563	0.015563	-0.221942	-0.482983	0.0390994	0.0953212	Lower in SVN
maternal_gene_12	K02010	maternal_gene_12__K02010	Maternal Fecal Metagenome (Genes)	1-2 months	stool_gene_maternal	-0.0149518	0.0149518	-0.307071	-0.56692	-0.0472217	0.0207214	Lower in SVN
maternal_gene_12	K16789	maternal_gene_12__K16789	Maternal Fecal Metagenome (Genes)	1-2 months	stool_gene_maternal	-0.0144488	0.0144488	-0.242205	-0.502997	0.0185882	0.0685886	Lower in SVN
maternal_gene_12	K17076	maternal_gene_12__K17076	Maternal Fecal Metagenome (Genes)	1-2 months	stool_gene_maternal	-0.0128758	0.0128758	-0.255037	-0.515661	0.00558724	0.0550827	Lower in SVN
maternal_gene_12	K02026	maternal_gene_12__K02026	Maternal Fecal Metagenome (Genes)	1-2 months	stool_gene_maternal	-0.011395	0.011395	-0.18851	-0.449914	0.0728932	0.156851	Lower in SVN
maternal_gene_12	GH123_0	maternal_gene_12__GH123_0	Maternal Fecal Metagenome (Genes)	1-2 months	stool_gene_maternal	-0.0106238	0.0106238	-0.252965	-0.513616	0.00768737	0.0571011	Lower in SVN
maternal_gene_12	K01679	maternal_gene_12__K01679	Maternal Fecal Metagenome (Genes)	1-2 months	stool_gene_maternal	-0.01036	0.01036	-0.286889	-0.547056	-0.0267222	0.0307969	Lower in SVN
maternal_gene_12	GH78_0	maternal_gene_12__GH78_0	Maternal Fecal Metagenome (Genes)	1-2 months	stool_gene_maternal	-0.0102855	0.0102855	-0.214495	-0.475622	0.0466321	0.107018	Lower in SVN
maternal_gene_12	K02032	maternal_gene_12__K02032	Maternal Fecal Metagenome (Genes)	1-2 months	stool_gene_maternal	-0.010257	0.010257	-0.250977	-0.511656	0.00970127	0.0590941	Lower in SVN
maternal_gene_12	GH106_0	maternal_gene_12__GH106_0	Maternal Fecal Metagenome (Genes)	1-2 months	stool_gene_maternal	-0.00961393	0.00961393	-0.242778	-0.503564	0.0180072	0.0679318	Lower in SVN
maternal_gene_12	K00852	maternal_gene_12__K00852	Maternal Fecal Metagenome (Genes)	1-2 months	stool_gene_maternal	-0.00900895	0.00900895	-0.258932	-0.519503	0.0016396	0.0514491	Lower in SVN
maternal_gene_12	K05989	maternal_gene_12__K05989	Maternal Fecal Metagenome (Genes)	1-2 months	stool_gene_maternal	-0.00853803	0.00853803	-0.210465	-0.471637	0.0507076	0.113805	Lower in SVN
maternal_gene_12	K02429	maternal_gene_12__K02429	Maternal Fecal Metagenome (Genes)	1-2 months	stool_gene_maternal	0.0079059	0.0079059	0.110807	-0.15121	0.372823	0.40586	Higher in SVN
maternal_gene_12	3004730	maternal_gene_12__3004730	Maternal Fecal Metagenome (Genes)	1-2 months	stool_gene_maternal	-0.00787074	0.00787074	-0.218658	-0.479738	0.0424213	0.100347	Lower in SVN
maternal_gene_12	K20610	maternal_gene_12__K20610	Maternal Fecal Metagenome (Genes)	1-2 months	stool_gene_maternal	-0.00787058	0.00787058	-0.243178	-0.503959	0.0176019	0.0674767	Lower in SVN
maternal_gene_12	K07079	maternal_gene_12__K07079	Maternal Fecal Metagenome (Genes)	1-2 months	stool_gene_maternal	-0.00762531	0.00762531	-0.268278	-0.528719	-0.00783728	0.0435367	Lower in SVN
maternal_gene_12	K02011	maternal_gene_12__K02011	Maternal Fecal Metagenome (Genes)	1-2 months	stool_gene_maternal	-0.00699323	0.00699323	-0.295644	-0.555676	-0.0356126	0.0260026	Lower in SVN
maternal_gene_12	K02031	maternal_gene_12__K02031	Maternal Fecal Metagenome (Genes)	1-2 months	stool_gene_maternal	-0.0062796	0.0062796	-0.235898	-0.496771	0.0249744	0.0761573	Lower in SVN
maternal_gene_12	K02033	maternal_gene_12__K02033	Maternal Fecal Metagenome (Genes)	1-2 months	stool_gene_maternal	-0.00587212	0.00587212	-0.244065	-0.504833	0.0167044	0.0664778	Lower in SVN
maternal_gene_12	K18332	maternal_gene_12__K18332	Maternal Fecal Metagenome (Genes)	1-2 months	stool_gene_maternal	-0.00581997	0.00581997	-0.237461	-0.498314	0.0233915	0.0742207	Lower in SVN
maternal_gene_12	K02034	maternal_gene_12__K02034	Maternal Fecal Metagenome (Genes)	1-2 months	stool_gene_maternal	-0.00564126	0.00564126	-0.217153	-0.47825	0.0439437	0.10272	Lower in SVN
maternal_gene_12	K11621	maternal_gene_12__K11621	Maternal Fecal Metagenome (Genes)	1-2 months	stool_gene_maternal	-0.00562267	0.00562267	-0.242677	-0.503463	0.0181101	0.0680478	Lower in SVN
maternal_gene_12	K10961	maternal_gene_12__K10961	Maternal Fecal Metagenome (Genes)	1-2 months	stool_gene_maternal	0.00540427	0.00540427	0.185517	-0.0759162	0.44695	0.163565	Higher in SVN
maternal_gene_12	K03406	maternal_gene_12__K03406	Maternal Fecal Metagenome (Genes)	1-2 months	stool_gene_maternal	0.00523906	0.00523906	0.194373	-0.0669712	0.455717	0.144307	Higher in SVN
maternal_gene_12	K23536	maternal_gene_12__K23536	Maternal Fecal Metagenome (Genes)	1-2 months	stool_gene_maternal	-0.00509959	0.00509959	-0.2675	-0.527952	-0.00704847	0.0441536	Lower in SVN
maternal_gene_12	K09607	maternal_gene_12__K09607	Maternal Fecal Metagenome (Genes)	1-2 months	stool_gene_maternal	0.0050653	0.0050653	0.159318	-0.102353	0.420989	0.23174	Higher in SVN
maternal_gene_12	GH109_0	maternal_gene_12__GH109_0	Maternal Fecal Metagenome (Genes)	1-2 months	stool_gene_maternal	-0.00479582	0.00479582	-0.252948	-0.5136	0.00770405	0.0571174	Lower in SVN
maternal_gene_12	K03704	maternal_gene_12__K03704	Maternal Fecal Metagenome (Genes)	1-2 months	stool_gene_maternal	0.00459203	0.00459203	0.115233	-0.146757	0.377223	0.387343	Higher in SVN
maternal_gene_12	3004036	maternal_gene_12__3004036	Maternal Fecal Metagenome (Genes)	1-2 months	stool_gene_maternal	-0.00453587	0.00453587	-0.22049	-0.481548	0.0405682	0.0975179	Lower in SVN
maternal_gene_12	K01191	maternal_gene_12__K01191	Maternal Fecal Metagenome (Genes)	1-2 months	stool_gene_maternal	-0.00419297	0.00419297	-0.197594	-0.458905	0.0637167	0.137749	Lower in SVN
maternal_gene_12	K02012	maternal_gene_12__K02012	Maternal Fecal Metagenome (Genes)	1-2 months	stool_gene_maternal	-0.0041876	0.0041876	-0.286838	-0.547006	-0.0266702	0.030827	Lower in SVN
maternal_gene_12	K20571	maternal_gene_12__K20571	Maternal Fecal Metagenome (Genes)	1-2 months	stool_gene_maternal	-0.00378833	0.00378833	-0.244216	-0.504983	0.0165513	0.0663087	Lower in SVN
maternal_gene_12	K20590	maternal_gene_12__K20590	Maternal Fecal Metagenome (Genes)	1-2 months	stool_gene_maternal	-0.0036823	0.0036823	-0.244654	-0.505416	0.0161068	0.0658195	Lower in SVN
maternal_gene_12	K23537	maternal_gene_12__K23537	Maternal Fecal Metagenome (Genes)	1-2 months	stool_gene_maternal	-0.0034826	0.0034826	-0.271694	-0.532085	-0.0113018	0.0409126	Lower in SVN
maternal_gene_12	K04751	maternal_gene_12__K04751	Maternal Fecal Metagenome (Genes)	1-2 months	stool_gene_maternal	-0.00335225	0.00335225	0.0841149	-0.178038	0.346268	0.528163	Higher in SVN
maternal_gene_12	K16329	maternal_gene_12__K16329	Maternal Fecal Metagenome (Genes)	1-2 months	stool_gene_maternal	-0.0033267	0.0033267	-0.309406	-0.569217	-0.0495948	0.0197649	Lower in SVN
maternal_gene_12	CBM67_0	maternal_gene_12__CBM67_0	Maternal Fecal Metagenome (Genes)	1-2 months	stool_gene_maternal	-0.00332665	0.00332665	-0.184201	-0.445647	0.0772444	0.166582	Lower in SVN
maternal_gene_12	K06518	maternal_gene_12__K06518	Maternal Fecal Metagenome (Genes)	1-2 months	stool_gene_maternal	-0.00262051	0.00262051	0.0613388	-0.200901	0.323579	0.645567	Higher in SVN
maternal_gene_12	K22300	maternal_gene_12__K22300	Maternal Fecal Metagenome (Genes)	1-2 months	stool_gene_maternal	-0.00255254	0.00255254	-0.268305	-0.528745	-0.00786486	0.0435153	Lower in SVN
maternal_gene_12	K04094	maternal_gene_12__K04094	Maternal Fecal Metagenome (Genes)	1-2 months	stool_gene_maternal	-0.00241531	0.00241531	-0.236037	-0.496907	0.0248343	0.0759842	Lower in SVN
maternal_gene_12	K15393	maternal_gene_12__K15393	Maternal Fecal Metagenome (Genes)	1-2 months	stool_gene_maternal	-0.00238405	0.00238405	-0.178302	-0.439804	0.0832002	0.180628	Lower in SVN
maternal_gene_12	K15635	maternal_gene_12__K15635	Maternal Fecal Metagenome (Genes)	1-2 months	stool_gene_maternal	-0.00225686	0.00225686	-0.231391	-0.492319	0.0295372	0.0819711	Lower in SVN
maternal_gene_12	GH38_0	maternal_gene_12__GH38_0	Maternal Fecal Metagenome (Genes)	1-2 months	stool_gene_maternal	-0.00214149	0.00214149	-0.190558	-0.451941	0.0708246	0.152379	Lower in SVN
maternal_gene_12	K02052	maternal_gene_12__K02052	Maternal Fecal Metagenome (Genes)	1-2 months	stool_gene_maternal	-0.00210229	0.00210229	-0.257252	-0.517846	0.00334169	0.0529905	Lower in SVN
maternal_gene_12	K12628	maternal_gene_12__K12628	Maternal Fecal Metagenome (Genes)	1-2 months	stool_gene_maternal	-0.00198103	0.00198103	-0.239339	-0.500168	0.0214901	0.0719477	Lower in SVN
maternal_gene_12	CBM9_0	maternal_gene_12__CBM9_0	Maternal Fecal Metagenome (Genes)	1-2 months	stool_gene_maternal	0.00195012	0.00195012	-0.154335	-0.416048	0.107377	0.246702	Lower in SVN
maternal_gene_12	K07045	maternal_gene_12__K07045	Maternal Fecal Metagenome (Genes)	1-2 months	stool_gene_maternal	-0.00190801	0.00190801	-0.250597	-0.51128	0.0100867	0.059482	Lower in SVN
maternal_gene_12	K00929	maternal_gene_12__K00929	Maternal Fecal Metagenome (Genes)	1-2 months	stool_gene_maternal	0.00152151	0.00152151	-0.205019	-0.466251	0.0562135	0.123505	Lower in SVN
maternal_gene_12	K25085	maternal_gene_12__K25085	Maternal Fecal Metagenome (Genes)	1-2 months	stool_gene_maternal	-0.00144845	0.00144845	-0.24555	-0.5063	0.0151992	0.0648299	Lower in SVN
maternal_gene_12	K07090	maternal_gene_12__K07090	Maternal Fecal Metagenome (Genes)	1-2 months	stool_gene_maternal	-0.00141163	0.00141163	-0.248143	-0.508859	0.0125727	0.062035	Lower in SVN
maternal_gene_12	K09815	maternal_gene_12__K09815	Maternal Fecal Metagenome (Genes)	1-2 months	stool_gene_maternal	-0.00136363	0.00136363	-0.287003	-0.547168	-0.0268374	0.0307302	Lower in SVN
maternal_gene_12	K09955	maternal_gene_12__K09955	Maternal Fecal Metagenome (Genes)	1-2 months	stool_gene_maternal	-0.00126869	0.00126869	-0.229953	-0.490898	0.0309929	0.0838998	Lower in SVN
maternal_gene_12	CE14_0	maternal_gene_12__CE14_0	Maternal Fecal Metagenome (Genes)	1-2 months	stool_gene_maternal	-0.00125561	0.00125561	-0.27242	-0.532802	-0.012039	0.0403718	Lower in SVN
maternal_gene_12	K15857	maternal_gene_12__K15857	Maternal Fecal Metagenome (Genes)	1-2 months	stool_gene_maternal	0.00120163	0.00120163	0.126693	-0.135224	0.38861	0.341833	Higher in SVN
maternal_gene_12	K03784	maternal_gene_12__K03784	Maternal Fecal Metagenome (Genes)	1-2 months	stool_gene_maternal	-0.00115355	0.00115355	-0.183325	-0.44478	0.0781291	0.168615	Lower in SVN
maternal_gene_12	K21255	maternal_gene_12__K21255	Maternal Fecal Metagenome (Genes)	1-2 months	stool_gene_maternal	-0.00105061	0.00105061	-0.192523	-0.453887	0.0688397	0.148179	Lower in SVN
maternal_gene_12	K00335	maternal_gene_12__K00335	Maternal Fecal Metagenome (Genes)	1-2 months	stool_gene_maternal	0.00103967	0.00103967	-0.25344	-0.514086	0.00720513	0.0566323	Lower in SVN
maternal_gene_12	K16870	maternal_gene_12__K16870	Maternal Fecal Metagenome (Genes)	1-2 months	stool_gene_maternal	-0.00101988	0.00101988	0.218704	-0.0423749	0.479783	0.100275	Higher in SVN
maternal_gene_12	K03803	maternal_gene_12__K03803	Maternal Fecal Metagenome (Genes)	1-2 months	stool_gene_maternal	-0.000975773	0.000975773	-0.304376	-0.564269	-0.0444834	0.0218748	Lower in SVN
maternal_gene_12	K06400	maternal_gene_12__K06400	Maternal Fecal Metagenome (Genes)	1-2 months	stool_gene_maternal	-0.000959828	0.000959828	-0.185936	-0.447364	0.0754934	0.162613	Lower in SVN
maternal_gene_12	K02566	maternal_gene_12__K02566	Maternal Fecal Metagenome (Genes)	1-2 months	stool_gene_maternal	-0.000909297	0.000909297	-0.314794	-0.574515	-0.0550719	0.0177029	Lower in SVN
maternal_gene_12	K03311	maternal_gene_12__K03311	Maternal Fecal Metagenome (Genes)	1-2 months	stool_gene_maternal	-0.000906801	0.000906801	-0.277976	-0.538276	-0.0176751	0.036434	Lower in SVN
maternal_gene_12	K00174	maternal_gene_12__K00174	Maternal Fecal Metagenome (Genes)	1-2 months	stool_gene_maternal	0.000871939	0.000871939	-0.264948	-0.525436	-0.00446072	0.0462294	Lower in SVN
maternal_gene_12	GH33_0	maternal_gene_12__GH33_0	Maternal Fecal Metagenome (Genes)	1-2 months	stool_gene_maternal	0.000854723	0.000854723	-0.167006	-0.428611	0.0945991	0.20993	Lower in SVN
maternal_gene_12	K00175	maternal_gene_12__K00175	Maternal Fecal Metagenome (Genes)	1-2 months	stool_gene_maternal	-0.000825583	0.000825583	-0.230944	-0.491877	0.0299901	0.0825673	Lower in SVN
maternal_gene_12	K01552	maternal_gene_12__K01552	Maternal Fecal Metagenome (Genes)	1-2 months	stool_gene_maternal	-0.00074558	0.00074558	-0.203688	-0.464934	0.0575588	0.125971	Lower in SVN
maternal_gene_12	GH39_0	maternal_gene_12__GH39_0	Maternal Fecal Metagenome (Genes)	1-2 months	stool_gene_maternal	0.00072537	0.00072537	-0.157826	-0.41951	0.103857	0.23615	Lower in SVN
maternal_gene_12	K15583	maternal_gene_12__K15583	Maternal Fecal Metagenome (Genes)	1-2 months	stool_gene_maternal	-0.000696706	0.000696706	-0.167936	-0.429533	0.0936608	0.207395	Lower in SVN
maternal_gene_12	K20983	maternal_gene_12__K20983	Maternal Fecal Metagenome (Genes)	1-2 months	stool_gene_maternal	-0.000666066	0.000666066	-0.18428	-0.445725	0.0771648	0.1664	Lower in SVN
maternal_gene_12	K02372	maternal_gene_12__K02372	Maternal Fecal Metagenome (Genes)	1-2 months	stool_gene_maternal	0.000621669	0.000621669	0.116614	-0.145367	0.378596	0.381669	Higher in SVN
maternal_gene_12	K02025	maternal_gene_12__K02025	Maternal Fecal Metagenome (Genes)	1-2 months	stool_gene_maternal	-0.000604062	0.000604062	-0.140364	-0.402185	0.121457	0.292197	Lower in SVN
maternal_gene_12	K00176	maternal_gene_12__K00176	Maternal Fecal Metagenome (Genes)	1-2 months	stool_gene_maternal	-0.000568112	0.000568112	-0.260502	-0.521052	4.73156e-05	0.0500413	Lower in SVN
maternal_gene_12	K00459	maternal_gene_12__K00459	Maternal Fecal Metagenome (Genes)	1-2 months	stool_gene_maternal	-0.000560813	0.000560813	0.106621	-0.155419	0.368661	0.423846	Higher in SVN
maternal_gene_12	K00821	maternal_gene_12__K00821	Maternal Fecal Metagenome (Genes)	1-2 months	stool_gene_maternal	-0.000545965	0.000545965	0.0606951	-0.201547	0.322937	0.649037	Higher in SVN
maternal_gene_12	K03786	maternal_gene_12__K03786	Maternal Fecal Metagenome (Genes)	1-2 months	stool_gene_maternal	-0.000442343	0.000442343	-0.249558	-0.510255	0.011139	0.0605519	Lower in SVN
maternal_gene_12	K23190	maternal_gene_12__K23190	Maternal Fecal Metagenome (Genes)	1-2 months	stool_gene_maternal	0.00043592	0.00043592	0.209686	-0.0514951	0.470867	0.115154	Higher in SVN
maternal_gene_12	K14245	maternal_gene_12__K14245	Maternal Fecal Metagenome (Genes)	1-2 months	stool_gene_maternal	0.000391892	0.000391892	0.0540183	-0.208244	0.316281	0.685462	Higher in SVN
maternal_gene_12	K07729	maternal_gene_12__K07729	Maternal Fecal Metagenome (Genes)	1-2 months	stool_gene_maternal	-0.000356926	0.000356926	-0.183296	-0.444751	0.0781582	0.168682	Lower in SVN
maternal_gene_12	K01271	maternal_gene_12__K01271	Maternal Fecal Metagenome (Genes)	1-2 months	stool_gene_maternal	-0.000340574	0.000340574	-0.207868	-0.469069	0.0533331	0.118353	Lower in SVN
maternal_gene_12	K03790	maternal_gene_12__K03790	Maternal Fecal Metagenome (Genes)	1-2 months	stool_gene_maternal	-0.000278722	0.000278722	-0.206457	-0.467673	0.0547599	0.120884	Lower in SVN
maternal_gene_12	K01223	maternal_gene_12__K01223	Maternal Fecal Metagenome (Genes)	1-2 months	stool_gene_maternal	-0.000278363	0.000278363	0.192188	-0.0691783	0.453555	0.148889	Higher in SVN
maternal_gene_12	K14747	maternal_gene_12__K14747	Maternal Fecal Metagenome (Genes)	1-2 months	stool_gene_maternal	0.000268435	0.000268435	-0.187599	-0.449012	0.0738136	0.158873	Lower in SVN
maternal_gene_12	K00626	maternal_gene_12__K00626	Maternal Fecal Metagenome (Genes)	1-2 months	stool_gene_maternal	0.000230848	0.000230848	-0.137927	-0.399766	0.123912	0.300672	Lower in SVN
maternal_gene_12	K08602	maternal_gene_12__K08602	Maternal Fecal Metagenome (Genes)	1-2 months	stool_gene_maternal	-0.000192064	0.000192064	-0.18837	-0.449775	0.0730345	0.15716	Lower in SVN
maternal_gene_12	K03320	maternal_gene_12__K03320	Maternal Fecal Metagenome (Genes)	1-2 months	stool_gene_maternal	-0.000130632	0.000130632	0.0747853	-0.187407	0.336977	0.574931	Higher in SVN
maternal_gene_12	K02825	maternal_gene_12__K02825	Maternal Fecal Metagenome (Genes)	1-2 months	stool_gene_maternal	-0.000106961	0.000106961	-0.204033	-0.465275	0.05721	0.125328	Lower in SVN
maternal_gene_12	K00334	maternal_gene_12__K00334	Maternal Fecal Metagenome (Genes)	1-2 months	stool_gene_maternal	9.9902e-05	9.9902e-05	-0.274536	-0.534887	-0.0141855	0.0388316	Lower in SVN
maternal_gene_12	K01585	maternal_gene_12__K01585	Maternal Fecal Metagenome (Genes)	1-2 months	stool_gene_maternal	-9.26459e-05	9.26459e-05	0.209651	-0.0515306	0.470832	0.115215	Higher in SVN
maternal_gene_12	CE7_0	maternal_gene_12__CE7_0	Maternal Fecal Metagenome (Genes)	1-2 months	stool_gene_maternal	-9.19187e-05	9.19187e-05	-0.181546	-0.443017	0.0799259	0.172801	Lower in SVN
maternal_gene_12	K06015	maternal_gene_12__K06015	Maternal Fecal Metagenome (Genes)	1-2 months	stool_gene_maternal	-7.19533e-05	7.19533e-05	-0.324663	-0.584217	-0.0651093	0.0144081	Lower in SVN
maternal_gene_12	K19271	maternal_gene_12__K19271	Maternal Fecal Metagenome (Genes)	1-2 months	stool_gene_maternal	-7.16732e-05	7.16732e-05	-0.299038	-0.559016	-0.0390593	0.0243251	Lower in SVN
maternal_gene_12	K09458	maternal_gene_12__K09458	Maternal Fecal Metagenome (Genes)	1-2 months	stool_gene_maternal	5.90417e-05	5.90417e-05	0.0846454	-0.177505	0.346796	0.525563	Higher in SVN
maternal_gene_12	K00177	maternal_gene_12__K00177	Maternal Fecal Metagenome (Genes)	1-2 months	stool_gene_maternal	5.5117e-05	5.5117e-05	-0.268607	-0.529043	-0.00817132	0.0432777	Lower in SVN
maternal_gene_12	K02027	maternal_gene_12__K02027	Maternal Fecal Metagenome (Genes)	1-2 months	stool_gene_maternal	-4.56597e-05	4.56597e-05	-0.147965	-0.409728	0.113798	0.266795	Lower in SVN
maternal_gene_12	K00548	maternal_gene_12__K00548	Maternal Fecal Metagenome (Genes)	1-2 months	stool_gene_maternal	-2.27034e-05	2.27034e-05	0.048501	-0.213776	0.310778	0.716125	Higher in SVN
maternal_prot_dep_12	P12830	maternal_prot_dep_12__P12830	Maternal Plasma Proteome (Depleted)	1-2 months	prot_dep	0.169557	0.169557	0.203727	-0.0575186	0.464973	0.125897	Higher in SVN
maternal_prot_dep_12	P25311	maternal_prot_dep_12__P25311	Maternal Plasma Proteome (Depleted)	1-2 months	prot_dep	0.0606289	0.0606289	0.0246507	-0.237672	0.286974	0.853381	Higher in SVN
maternal_prot_dep_12	P49747	maternal_prot_dep_12__P49747	Maternal Plasma Proteome (Depleted)	1-2 months	prot_dep	-0.0449327	0.0449327	-0.153764	-0.415481	0.107953	0.248461	Lower in SVN
maternal_prot_dep_12	Q05BV3	maternal_prot_dep_12__Q05BV3	Maternal Plasma Proteome (Depleted)	1-2 months	prot_dep	0.0446515	0.0446515	-0.202151	-0.463414	0.0591116	0.128864	Lower in SVN
maternal_prot_dep_12	P62495	maternal_prot_dep_12__P62495	Maternal Plasma Proteome (Depleted)	1-2 months	prot_dep	0.0356485	0.0356485	-0.070646	-0.332854	0.191562	0.596287	Lower in SVN
maternal_prot_dep_12	P51812	maternal_prot_dep_12__P51812	Maternal Plasma Proteome (Depleted)	1-2 months	prot_dep	0.0348788	0.0348788	0.311955	0.0521856	0.571723	0.0187647	Higher in SVN
maternal_prot_dep_12	Q92820	maternal_prot_dep_12__Q92820	Maternal Plasma Proteome (Depleted)	1-2 months	prot_dep	0.0348499	0.0348499	-0.0411647	-0.303459	0.22113	0.757605	Lower in SVN
maternal_prot_dep_12	P01019	maternal_prot_dep_12__P01019	Maternal Plasma Proteome (Depleted)	1-2 months	prot_dep	0.0341083	0.0341083	0.346031	0.0868582	0.605204	0.00905739	Higher in SVN
maternal_prot_dep_12	P22891	maternal_prot_dep_12__P22891	Maternal Plasma Proteome (Depleted)	1-2 months	prot_dep	0.0324297	0.0324297	-0.0340386	-0.296347	0.22827	0.798573	Lower in SVN
maternal_prot_dep_12	O15417	maternal_prot_dep_12__O15417	Maternal Plasma Proteome (Depleted)	1-2 months	prot_dep	-0.0240381	0.0240381	-0.231087	-0.492019	0.0298446	0.0823754	Lower in SVN
maternal_prot_dep_12	Q8TF72	maternal_prot_dep_12__Q8TF72	Maternal Plasma Proteome (Depleted)	1-2 months	prot_dep	0.0202442	0.0202442	0.311816	0.0520453	0.571588	0.0188178	Higher in SVN
maternal_prot_dep_12	Q9NZP8	maternal_prot_dep_12__Q9NZP8	Maternal Plasma Proteome (Depleted)	1-2 months	prot_dep	0.0200419	0.0200419	0.000975711	-0.261363	0.263315	0.994164	Higher in SVN
maternal_prot_dep_12	P02750	maternal_prot_dep_12__P02750	Maternal Plasma Proteome (Depleted)	1-2 months	prot_dep	0.0196547	0.0196547	-0.231509	-0.492436	0.0294177	0.0818144	Lower in SVN
maternal_prot_dep_12	P14151	maternal_prot_dep_12__P14151	Maternal Plasma Proteome (Depleted)	1-2 months	prot_dep	0.0190052	0.0190052	0.0318223	-0.23049	0.294135	0.811434	Higher in SVN
maternal_prot_dep_12	P08185	maternal_prot_dep_12__P08185	Maternal Plasma Proteome (Depleted)	1-2 months	prot_dep	0.0151036	0.0151036	0.284148	0.0239395	0.544357	0.0324452	Higher in SVN
maternal_prot_dep_12	O43147	maternal_prot_dep_12__O43147	Maternal Plasma Proteome (Depleted)	1-2 months	prot_dep	0.0149276	0.0149276	0.0223643	-0.239962	0.28469	0.866848	Higher in SVN
maternal_prot_dep_12	P01008	maternal_prot_dep_12__P01008	Maternal Plasma Proteome (Depleted)	1-2 months	prot_dep	0.0146168	0.0146168	-0.0610509	-0.323292	0.20119	0.647118	Lower in SVN
maternal_prot_dep_12	Q9UQR0	maternal_prot_dep_12__Q9UQR0	Maternal Plasma Proteome (Depleted)	1-2 months	prot_dep	0.0138073	0.0138073	0.312488	0.0527275	0.572248	0.0185612	Higher in SVN
maternal_prot_dep_12	P05546	maternal_prot_dep_12__P05546	Maternal Plasma Proteome (Depleted)	1-2 months	prot_dep	0.0112023	0.0112023	0.263936	0.00343364	0.524437	0.0470757	Higher in SVN
maternal_prot_dep_12	Q8IVG5	maternal_prot_dep_12__Q8IVG5	Maternal Plasma Proteome (Depleted)	1-2 months	prot_dep	0.0110457	0.0110457	0.144065	-0.117728	0.405859	0.279631	Higher in SVN
maternal_prot_dep_12	P15144	maternal_prot_dep_12__P15144	Maternal Plasma Proteome (Depleted)	1-2 months	prot_dep	0.0108806	0.0108806	0.104579	-0.157473	0.36663	0.432788	Higher in SVN
maternal_prot_dep_12	P02786	maternal_prot_dep_12__P02786	Maternal Plasma Proteome (Depleted)	1-2 months	prot_dep	0.0107904	0.0107904	-0.0927714	-0.354884	0.169341	0.486564	Lower in SVN
maternal_prot_dep_12	P05543	maternal_prot_dep_12__P05543	Maternal Plasma Proteome (Depleted)	1-2 months	prot_dep	0.0105307	0.0105307	-0.0260213	-0.288343	0.2363	0.845329	Lower in SVN
maternal_prot_dep_12	P17024	maternal_prot_dep_12__P17024	Maternal Plasma Proteome (Depleted)	1-2 months	prot_dep	0.0103226	0.0103226	0.00350702	-0.258832	0.265846	0.979025	Higher in SVN
maternal_prot_dep_12	P07339	maternal_prot_dep_12__P07339	Maternal Plasma Proteome (Depleted)	1-2 months	prot_dep	0.00946153	0.00946153	0.153774	-0.107943	0.415491	0.248429	Higher in SVN
maternal_prot_dep_12	Q7Z7A4	maternal_prot_dep_12__Q7Z7A4	Maternal Plasma Proteome (Depleted)	1-2 months	prot_dep	0.00857553	0.00857553	0.107147	-0.15489	0.369184	0.421561	Higher in SVN
maternal_prot_dep_12	P08603	maternal_prot_dep_12__P08603	Maternal Plasma Proteome (Depleted)	1-2 months	prot_dep	-0.00753643	0.00753643	-0.3282	-0.587693	-0.0687073	0.0133658	Lower in SVN
maternal_prot_dep_12	Q9GZU5	maternal_prot_dep_12__Q9GZU5	Maternal Plasma Proteome (Depleted)	1-2 months	prot_dep	0.00745132	0.00745132	0.190563	-0.0708204	0.451946	0.15237	Higher in SVN
maternal_prot_dep_12	Q53FD0	maternal_prot_dep_12__Q53FD0	Maternal Plasma Proteome (Depleted)	1-2 months	prot_dep	0.00720378	0.00720378	0.300117	0.0401556	0.560078	0.0238116	Higher in SVN
maternal_prot_dep_12	P06276	maternal_prot_dep_12__P06276	Maternal Plasma Proteome (Depleted)	1-2 months	prot_dep	0.00654652	0.00654652	0.0219365	-0.24039	0.284263	0.869372	Higher in SVN
maternal_prot_dep_12	Q92959	maternal_prot_dep_12__Q92959	Maternal Plasma Proteome (Depleted)	1-2 months	prot_dep	-0.00578133	0.00578133	-0.189682	-0.451073	0.0717103	0.154282	Lower in SVN
maternal_prot_dep_12	P12955	maternal_prot_dep_12__P12955	Maternal Plasma Proteome (Depleted)	1-2 months	prot_dep	0.00457493	0.00457493	0.0147008	-0.247633	0.277034	0.912243	Higher in SVN
maternal_prot_dep_12	P13473	maternal_prot_dep_12__P13473	Maternal Plasma Proteome (Depleted)	1-2 months	prot_dep	0.00438565	0.00438565	0.127553	-0.134358	0.389464	0.33856	Higher in SVN
maternal_prot_dep_12	P08620	maternal_prot_dep_12__P08620	Maternal Plasma Proteome (Depleted)	1-2 months	prot_dep	-0.00382978	0.00382978	-0.126593	-0.38851	0.135325	0.342216	Lower in SVN
maternal_prot_dep_12	Q9UNW1	maternal_prot_dep_12__Q9UNW1	Maternal Plasma Proteome (Depleted)	1-2 months	prot_dep	0.00357479	0.00357479	0.219102	-0.0419729	0.480176	0.0996563	Higher in SVN
maternal_prot_dep_12	Q5VWQ8	maternal_prot_dep_12__Q5VWQ8	Maternal Plasma Proteome (Depleted)	1-2 months	prot_dep	-0.00357385	0.00357385	0.119737	-0.142225	0.381699	0.369033	Higher in SVN
maternal_prot_dep_12	Q9NZ71	maternal_prot_dep_12__Q9NZ71	Maternal Plasma Proteome (Depleted)	1-2 months	prot_dep	-0.00350939	0.00350939	-0.200513	-0.461793	0.0607674	0.132006	Lower in SVN
maternal_prot_dep_12	Q7Z398	maternal_prot_dep_12__Q7Z398	Maternal Plasma Proteome (Depleted)	1-2 months	prot_dep	0.00263273	0.00263273	0.275665	0.0153309	0.535999	0.0380303	Higher in SVN
maternal_prot_dep_12	Q8WVT3	maternal_prot_dep_12__Q8WVT3	Maternal Plasma Proteome (Depleted)	1-2 months	prot_dep	-0.00218329	0.00218329	-0.125019	-0.386947	0.136909	0.348259	Lower in SVN
maternal_prot_dep_12	P22792	maternal_prot_dep_12__P22792	Maternal Plasma Proteome (Depleted)	1-2 months	prot_dep	0.00216591	0.00216591	0.308809	0.048988	0.56863	0.0200057	Higher in SVN
maternal_prot_dep_12	Q99707	maternal_prot_dep_12__Q99707	Maternal Plasma Proteome (Depleted)	1-2 months	prot_dep	-0.00204493	0.00204493	-0.118558	-0.380527	0.143411	0.373774	Lower in SVN
maternal_prot_dep_12	P16070	maternal_prot_dep_12__P16070	Maternal Plasma Proteome (Depleted)	1-2 months	prot_dep	0.00203093	0.00203093	-0.0424453	-0.304737	0.219846	0.75031	Lower in SVN
maternal_prot_dep_12	Q8N7Y1	maternal_prot_dep_12__Q8N7Y1	Maternal Plasma Proteome (Depleted)	1-2 months	prot_dep	-0.0020101	0.0020101	-0.106995	-0.369033	0.155043	0.422218	Lower in SVN
maternal_prot_dep_12	P51884	maternal_prot_dep_12__P51884	Maternal Plasma Proteome (Depleted)	1-2 months	prot_dep	0.0019705	0.0019705	0.25625	-0.00435737	0.516858	0.0539284	Higher in SVN
maternal_prot_dep_12	P09960	maternal_prot_dep_12__P09960	Maternal Plasma Proteome (Depleted)	1-2 months	prot_dep	-0.000771138	0.000771138	0.0274697	-0.23485	0.289789	0.836836	Higher in SVN
maternal_prot_dep_12	O95389	maternal_prot_dep_12__O95389	Maternal Plasma Proteome (Depleted)	1-2 months	prot_dep	0.000356851	0.000356851	0.249151	-0.0115512	0.509854	0.0609752	Higher in SVN
maternal_prot_dep_12	P06396	maternal_prot_dep_12__P06396	Maternal Plasma Proteome (Depleted)	1-2 months	prot_dep	0.000344894	0.000344894	0.117691	-0.144283	0.379666	0.377281	Higher in SVN
maternal_prot_dep_12	A0A0C4DH29	maternal_prot_dep_12__A0A0C4DH29	Maternal Plasma Proteome (Depleted)	1-2 months	prot_dep	-0.000311022	0.000311022	-0.122822	-0.384765	0.13912	0.356807	Lower in SVN
maternal_prot_dep_12	Q6UXB8	maternal_prot_dep_12__Q6UXB8	Maternal Plasma Proteome (Depleted)	1-2 months	prot_dep	-0.000164252	0.000164252	0.0816077	-0.180556	0.343772	0.54054	Higher in SVN
maternal_prot_dep_12	P07360	maternal_prot_dep_12__P07360	Maternal Plasma Proteome (Depleted)	1-2 months	prot_dep	-2.56566e-06	2.56566e-06	-0.269737	-0.530157	-0.00931737	0.0423988	Lower in SVN
maternal_prot_nav_12	P04196	maternal_prot_nav_12__P04196	Maternal Plasma Proteome (Naive)	1-2 months	prot_nav	0.0953221	0.0953221	-0.0515628	-0.313832	0.210706	0.699049	Lower in SVN
maternal_prot_nav_12	Q9UGM5	maternal_prot_nav_12__Q9UGM5	Maternal Plasma Proteome (Naive)	1-2 months	prot_nav	0.067139	0.067139	0.105354	-0.156694	0.367401	0.429382	Higher in SVN
maternal_prot_nav_12	P02786	maternal_prot_nav_12__P02786	Maternal Plasma Proteome (Naive)	1-2 months	prot_nav	0.0520379	0.0520379	-0.0549586	-0.317218	0.207301	0.680285	Lower in SVN
maternal_prot_nav_12	P00748	maternal_prot_nav_12__P00748	Maternal Plasma Proteome (Naive)	1-2 months	prot_nav	0.0375516	0.0375516	0.175223	-0.0863083	0.436754	0.188299	Higher in SVN
maternal_prot_nav_12	P08697	maternal_prot_nav_12__P08697	Maternal Plasma Proteome (Naive)	1-2 months	prot_nav	0.0219578	0.0219578	-0.178652	-0.440151	0.0828467	0.179771	Lower in SVN
maternal_prot_nav_12	P10643	maternal_prot_nav_12__P10643	Maternal Plasma Proteome (Naive)	1-2 months	prot_nav	0.018037	0.018037	0.108991	-0.153036	0.371018	0.413605	Higher in SVN
maternal_prot_nav_12	P01700	maternal_prot_nav_12__P01700	Maternal Plasma Proteome (Naive)	1-2 months	prot_nav	0.0166788	0.0166788	0.125566	-0.136358	0.387491	0.34615	Higher in SVN
maternal_prot_nav_12	P06727	maternal_prot_nav_12__P06727	Maternal Plasma Proteome (Naive)	1-2 months	prot_nav	0.015749	0.015749	0.191345	-0.0700301	0.45272	0.150687	Higher in SVN
maternal_prot_nav_12	P01009	maternal_prot_nav_12__P01009	Maternal Plasma Proteome (Naive)	1-2 months	prot_nav	0.0156912	0.0156912	0.159571	-0.102099	0.42124	0.230998	Higher in SVN
maternal_prot_nav_12	P02749	maternal_prot_nav_12__P02749	Maternal Plasma Proteome (Naive)	1-2 months	prot_nav	0.0155328	0.0155328	0.0888041	-0.173328	0.350936	0.505408	Higher in SVN
maternal_prot_nav_12	Q6ZN19	maternal_prot_nav_12__Q6ZN19	Maternal Plasma Proteome (Naive)	1-2 months	prot_nav	-0.0130463	0.0130463	0.0212762	-0.241051	0.283603	0.87327	Higher in SVN
maternal_prot_nav_12	P14151	maternal_prot_nav_12__P14151	Maternal Plasma Proteome (Naive)	1-2 months	prot_nav	0.0127914	0.0127914	-0.102604	-0.364666	0.159458	0.441536	Lower in SVN
maternal_prot_nav_12	Q9HB75	maternal_prot_nav_12__Q9HB75	Maternal Plasma Proteome (Naive)	1-2 months	prot_nav	-0.00999597	0.00999597	-0.14526	-0.407044	0.116524	0.275654	Lower in SVN
maternal_prot_nav_12	A0A0J9YXX1	maternal_prot_nav_12__A0A0J9YXX1	Maternal Plasma Proteome (Naive)	1-2 months	prot_nav	0.00978597	0.00978597	0.136612	-0.125236	0.39846	0.305314	Higher in SVN
maternal_prot_nav_12	P03952	maternal_prot_nav_12__P03952	Maternal Plasma Proteome (Naive)	1-2 months	prot_nav	0.00968286	0.00968286	-0.00516524	-0.267504	0.257173	0.969112	Lower in SVN
maternal_prot_nav_12	Q02790	maternal_prot_nav_12__Q02790	Maternal Plasma Proteome (Naive)	1-2 months	prot_nav	-0.00904619	0.00904619	-0.252768	-0.513423	0.00788609	0.0572953	Lower in SVN
maternal_prot_nav_12	P04083	maternal_prot_nav_12__P04083	Maternal Plasma Proteome (Naive)	1-2 months	prot_nav	0.00838198	0.00838198	-0.0840976	-0.346251	0.178056	0.528248	Lower in SVN
maternal_prot_nav_12	P26927	maternal_prot_nav_12__P26927	Maternal Plasma Proteome (Naive)	1-2 months	prot_nav	0.00816647	0.00816647	-0.00470237	-0.267041	0.257636	0.971878	Lower in SVN
maternal_prot_nav_12	Q8TF72	maternal_prot_nav_12__Q8TF72	Maternal Plasma Proteome (Naive)	1-2 months	prot_nav	0.00757964	0.00757964	0.288666	0.0285256	0.548805	0.0297674	Higher in SVN
maternal_prot_nav_12	P01008	maternal_prot_nav_12__P01008	Maternal Plasma Proteome (Naive)	1-2 months	prot_nav	0.00745724	0.00745724	0.0326335	-0.229678	0.294945	0.806721	Higher in SVN
maternal_prot_nav_12	A0A075B6I4	maternal_prot_nav_12__A0A075B6I4	Maternal Plasma Proteome (Naive)	1-2 months	prot_nav	-0.00555388	0.00555388	-0.0364013	-0.298706	0.225903	0.784923	Lower in SVN
maternal_prot_nav_12	Q15428	maternal_prot_nav_12__Q15428	Maternal Plasma Proteome (Naive)	1-2 months	prot_nav	-0.0047342	0.0047342	-0.257276	-0.51787	0.00331762	0.0529684	Lower in SVN
maternal_prot_nav_12	P02652	maternal_prot_nav_12__P02652	Maternal Plasma Proteome (Naive)	1-2 months	prot_nav	-0.00457164	0.00457164	-0.210395	-0.471568	0.0507785	0.113926	Lower in SVN
maternal_prot_nav_12	P79522	maternal_prot_nav_12__P79522	Maternal Plasma Proteome (Naive)	1-2 months	prot_nav	-0.00444007	0.00444007	-0.2242	-0.485215	0.0368145	0.0919827	Lower in SVN
maternal_prot_nav_12	P00736	maternal_prot_nav_12__P00736	Maternal Plasma Proteome (Naive)	1-2 months	prot_nav	0.00432801	0.00432801	0.0464936	-0.215789	0.308776	0.727398	Higher in SVN
maternal_prot_nav_12	P23083	maternal_prot_nav_12__P23083	Maternal Plasma Proteome (Naive)	1-2 months	prot_nav	0.00404107	0.00404107	0.010075	-0.252261	0.272411	0.939793	Higher in SVN
maternal_prot_nav_12	Q96MM7	maternal_prot_nav_12__Q96MM7	Maternal Plasma Proteome (Naive)	1-2 months	prot_nav	0.003866	0.003866	-0.194761	-0.456101	0.0665792	0.143505	Lower in SVN
maternal_prot_nav_12	P05408	maternal_prot_nav_12__P05408	Maternal Plasma Proteome (Naive)	1-2 months	prot_nav	0.00381375	0.00381375	-0.11988	-0.381842	0.142081	0.36846	Lower in SVN
maternal_prot_nav_12	Q5T7W7	maternal_prot_nav_12__Q5T7W7	Maternal Plasma Proteome (Naive)	1-2 months	prot_nav	0.003498	0.003498	0.134258	-0.127607	0.396123	0.313738	Higher in SVN
maternal_prot_nav_12	Q6PEZ8	maternal_prot_nav_12__Q6PEZ8	Maternal Plasma Proteome (Naive)	1-2 months	prot_nav	0.00270229	0.00270229	-0.195514	-0.456847	0.0658185	0.141958	Lower in SVN
maternal_prot_nav_12	P02760	maternal_prot_nav_12__P02760	Maternal Plasma Proteome (Naive)	1-2 months	prot_nav	-0.00270067	0.00270067	0.0228495	-0.239476	0.285175	0.863987	Higher in SVN
maternal_prot_nav_12	P51884	maternal_prot_nav_12__P51884	Maternal Plasma Proteome (Naive)	1-2 months	prot_nav	0.00251062	0.00251062	0.00852054	-0.253817	0.270858	0.949068	Higher in SVN
maternal_prot_nav_12	P01023	maternal_prot_nav_12__P01023	Maternal Plasma Proteome (Naive)	1-2 months	prot_nav	-0.00239926	0.00239926	0.0609759	-0.201265	0.323217	0.647523	Higher in SVN
maternal_prot_nav_12	Q08257	maternal_prot_nav_12__Q08257	Maternal Plasma Proteome (Naive)	1-2 months	prot_nav	0.00231415	0.00231415	-0.0169836	-0.279315	0.245348	0.898684	Lower in SVN
maternal_prot_nav_12	P02787	maternal_prot_nav_12__P02787	Maternal Plasma Proteome (Naive)	1-2 months	prot_nav	0.0020529	0.0020529	-0.0365199	-0.298824	0.225784	0.784239	Lower in SVN
maternal_prot_nav_12	P01019	maternal_prot_nav_12__P01019	Maternal Plasma Proteome (Naive)	1-2 months	prot_nav	-0.00198498	0.00198498	0.322385	0.0627914	0.581978	0.0151168	Higher in SVN
maternal_prot_nav_12	P09871	maternal_prot_nav_12__P09871	Maternal Plasma Proteome (Naive)	1-2 months	prot_nav	-0.00176012	0.00176012	-0.113785	-0.375784	0.148213	0.393341	Lower in SVN
maternal_prot_nav_12	Q99538	maternal_prot_nav_12__Q99538	Maternal Plasma Proteome (Naive)	1-2 months	prot_nav	0.00111178	0.00111178	0.0300296	-0.232286	0.292345	0.821874	Higher in SVN
maternal_prot_nav_12	P02745	maternal_prot_nav_12__P02745	Maternal Plasma Proteome (Naive)	1-2 months	prot_nav	0.000986011	0.000986011	0.148983	-0.112773	0.410738	0.263511	Higher in SVN
maternal_prot_nav_12	P36957	maternal_prot_nav_12__P36957	Maternal Plasma Proteome (Naive)	1-2 months	prot_nav	-0.000884858	0.000884858	-0.0818003	-0.343963	0.180363	0.539584	Lower in SVN
maternal_prot_nav_12	P01011	maternal_prot_nav_12__P01011	Maternal Plasma Proteome (Naive)	1-2 months	prot_nav	0.000863627	0.000863627	-0.103352	-0.365411	0.158706	0.438208	Lower in SVN
maternal_prot_nav_12	P29622	maternal_prot_nav_12__P29622	Maternal Plasma Proteome (Naive)	1-2 months	prot_nav	-0.000835599	0.000835599	0.188355	-0.0730498	0.44976	0.157194	Higher in SVN
maternal_prot_nav_12	P05155	maternal_prot_nav_12__P05155	Maternal Plasma Proteome (Naive)	1-2 months	prot_nav	-0.000730123	0.000730123	-0.0580753	-0.320326	0.204175	0.663236	Lower in SVN
maternal_prot_nav_12	P02750	maternal_prot_nav_12__P02750	Maternal Plasma Proteome (Naive)	1-2 months	prot_nav	0.000630008	0.000630008	-0.208021	-0.46922	0.0531785	0.118081	Lower in SVN
maternal_prot_nav_12	P08185	maternal_prot_nav_12__P08185	Maternal Plasma Proteome (Naive)	1-2 months	prot_nav	0.000567192	0.000567192	0.165265	-0.0963549	0.426886	0.214733	Higher in SVN
maternal_prot_nav_12	P08637	maternal_prot_nav_12__P08637	Maternal Plasma Proteome (Naive)	1-2 months	prot_nav	0.00052408	0.00052408	-0.125347	-0.387273	0.136579	0.346994	Lower in SVN
maternal_prot_nav_12	P01701	maternal_prot_nav_12__P01701	Maternal Plasma Proteome (Naive)	1-2 months	prot_nav	0.000382678	0.000382678	0.105824	-0.15622	0.367869	0.427321	Higher in SVN
maternal_prot_nav_12	Q96AY3	maternal_prot_nav_12__Q96AY3	Maternal Plasma Proteome (Naive)	1-2 months	prot_nav	-0.000322576	0.000322576	0.168534	-0.0930575	0.430126	0.205778	Higher in SVN
maternal_prot_nav_12	P00450	maternal_prot_nav_12__P00450	Maternal Plasma Proteome (Naive)	1-2 months	prot_nav	0.000237456	0.000237456	0.114643	-0.14735	0.376637	0.389779	Higher in SVN
maternal_prot_nav_12	Q7RTP6	maternal_prot_nav_12__Q7RTP6	Maternal Plasma Proteome (Naive)	1-2 months	prot_nav	7.78411e-05	7.78411e-05	0.0758056	-0.186382	0.337994	0.569723	Higher in SVN
maternal_taxa_12	Unknown_RUG410.6	maternal_taxa_12__Unknown_RUG410.6	Maternal Fecal Microbiome (Taxa)	1-2 months	stool_microbiome_maternal	0.0973864	0.0973864	0.268773	0.0083395	0.529207	0.0431478	Higher in SVN
maternal_taxa_12	Unknown_CAG.590.1	maternal_taxa_12__Unknown_CAG.590.1	Maternal Fecal Microbiome (Taxa)	1-2 months	stool_microbiome_maternal	0.0927794	0.0927794	0.144506	-0.117284	0.406296	0.27816	Higher in SVN
maternal_taxa_12	Unknown_CAG.465_1.5	maternal_taxa_12__Unknown_CAG.465_1.5	Maternal Fecal Microbiome (Taxa)	1-2 months	stool_microbiome_maternal	0.0818041	0.0818041	0.261655	0.00112164	0.522189	0.0490285	Higher in SVN
maternal_taxa_12	Unknown_UBA1381.13	maternal_taxa_12__Unknown_UBA1381.13	Maternal Fecal Microbiome (Taxa)	1-2 months	stool_microbiome_maternal	0.0792761	0.0792761	0.0871473	-0.174992	0.349287	0.513389	Higher in SVN
maternal_taxa_12	Unknown_TF01.11	maternal_taxa_12__Unknown_TF01.11	Maternal Fecal Microbiome (Taxa)	1-2 months	stool_microbiome_maternal	0.0724943	0.0724943	-0.0345664	-0.296874	0.227741	0.795518	Lower in SVN
maternal_taxa_12	Unknown_CAG.508	maternal_taxa_12__Unknown_CAG.508	Maternal Fecal Microbiome (Taxa)	1-2 months	stool_microbiome_maternal	0.0614169	0.0614169	0.242495	-0.0182943	0.503284	0.0682558	Higher in SVN
maternal_taxa_12	TF01.11.sp001414325	maternal_taxa_12__TF01.11.sp001414325	Maternal Fecal Microbiome (Taxa)	1-2 months	stool_microbiome_maternal	0.0576081	0.0576081	0.162867	-0.0987745	0.424508	0.221482	Higher in SVN
maternal_taxa_12	Haemophilus_D.parainfluenzae	maternal_taxa_12__Haemophilus_D.parainfluenzae	Maternal Fecal Microbiome (Taxa)	1-2 months	stool_microbiome_maternal	0.0552253	0.0552253	0.120747	-0.141208	0.382703	0.365002	Higher in SVN
maternal_taxa_12	Unknown_CAG.877.6	maternal_taxa_12__Unknown_CAG.877.6	Maternal Fecal Microbiome (Taxa)	1-2 months	stool_microbiome_maternal	0.0434895	0.0434895	0.0477452	-0.214534	0.310024	0.720362	Higher in SVN
maternal_taxa_12	Unknown_Bariatricus.2	maternal_taxa_12__Unknown_Bariatricus.2	Maternal Fecal Microbiome (Taxa)	1-2 months	stool_microbiome_maternal	0.0386413	0.0386413	0.29646	0.0364406	0.556479	0.0255908	Higher in SVN
maternal_taxa_12	Unknown_CAG.115.6	maternal_taxa_12__Unknown_CAG.115.6	Maternal Fecal Microbiome (Taxa)	1-2 months	stool_microbiome_maternal	0.0343839	0.0343839	0.0976379	-0.164451	0.359726	0.463975	Higher in SVN
maternal_taxa_12	UBA6984.sp900550295	maternal_taxa_12__UBA6984.sp900550295	Maternal Fecal Microbiome (Taxa)	1-2 months	stool_microbiome_maternal	0.0289185	0.0289185	0.0747779	-0.187414	0.33697	0.574969	Higher in SVN
maternal_taxa_12	Unknown_Clostridia	maternal_taxa_12__Unknown_Clostridia	Maternal Fecal Microbiome (Taxa)	1-2 months	stool_microbiome_maternal	0.0287322	0.0287322	-0.0411238	-0.303418	0.221171	0.757838	Lower in SVN
[truncated: 393 more rows]
