# Supplementary material
Source: Research Square preprint supplement (doi:10.21203/rs.3.rs-10243829/v1)
Supplement: Supplementary file 3 [file 8a703e749596092a1d759b71.xlsx]

## Sheet: description
dWHZ_later_comp1 & dWHZ_later_comp2
Column	Explanation	Remarks
block:	Omics data block from which the feature was selected.
feature:	Feature identifier as represented in the input dataset.
feature_model:	Unique feature label used in the sPLS modeling output.
block_label:	Human-readable label for the corresponding omics block.
timepoint:	Sampling time point at which the feature was measured.
block_key:	Internal identifier combining block and feature information for tracking across analyses.
signed_score:	Feature ranking metric retaining the direction of association.
score:	Absolute feature ranking metric used to prioritize features.
beta_svn:	Estimated effect size for the association between the feature and SVN status.
conf.low:	Lower bound of the confidence interval for beta_svn.
conf.high:	Upper bound of the confidence interval for beta_svn.
p_value:	Nominal p-value for the association with SVN status.
svn_direction:	Direction of association with SVN status (higher in SVNs or controls).
mz:	Mass-to-charge ratio of the metabolite feature, where applicable.	for metabolome features only
rt:	Retention time of the metabolite feature, where applicable.	for metabolome features only
ion_mode:	Ionization mode used for metabolite detection, where applicable.	for metabolome features only; from mummichog
mummi_EID:	Mummichog empirical feature identifier, where applicable.	for metabolome features only; from mummichog
mummi_compounds:	Candidate compound IDs assigned by Mummichog, where applicable.	for metabolome features only; from mummichog
mummi_compound_names:	Candidate compound names assigned by Mummichog, where applicable.	for metabolome features only; from mummichog

## Sheet: dWHZ_later_comp1
block	feature	feature_model	block_label	timepoint	block_key	signed_score	score	beta_svn	conf.low	conf.high	p_value	svn_direction	mz	rt	ion_mode	mummi_EID	mummi_compounds	mummi_compound_names
milk_bioactive_34	Calprotectin	milk_bioactive_34__Calprotectin	Milk Bioactive Proteins	3-4 months	bioactive_proteins	0.169956	0.169956	-0.196873	-0.454811	0.0610652	0.134114	Lower in SVN
stool_scfa_56	Butyrate	stool_scfa_56__Butyrate	Infant Fecal SCFAs	5-6 months	stool_scfa_infant	0.133144	0.133144	0.229505	-0.0280631	0.487074	0.0805268	Higher in SVN
milk_macro_micro_34	Mg	milk_macro_micro_34__Mg	Milk Macro- and Micronutrients	3-4 months	macro_micronutrients	-0.103257	0.103257	0.193112	-0.0648648	0.451089	0.141739	Higher in SVN
maternal_taxa_56	Unknown_Prevotella.4	maternal_taxa_56__Unknown_Prevotella.4	Maternal Fecal Microbiome (Taxa)	5-6 months	stool_microbiome_maternal	-0.0904563	0.0904563	0.0692461	-0.189592	0.328084	0.598887	Higher in SVN
maternal_prot_nav_56	P01706	maternal_prot_nav_56__P01706	Maternal Plasma Proteome (Naive)	5-6 months	prot_nav	-0.0782501	0.0782501	0.0167049	-0.242252	0.275662	0.899049	Higher in SVN
milk_hmo_34	DSLNH_nmol/mL	milk_hmo_34__DSLNH_nmol/mL	Milk HMOs	3-4 months	hmos	0.0726246	0.0726246	-0.00282637	-0.261791	0.256138	0.982875	Lower in SVN
milk_metabolome_34	rLC_neg_mtb_8460671	milk_metabolome_34__rLC_neg_mtb_8460671	Milk Metabolome	3-4 months	milk_metabolome	-0.0725847	0.0725847	-0.34402	-0.599837	-0.0882028	0.00857445	Lower in SVN	160.936	0.62	negative
stool_scfa_56	Valerate	stool_scfa_56__Valerate	Infant Fecal SCFAs	5-6 months	stool_scfa_infant	0.0714173	0.0714173	0.168662	-0.0895493	0.426873	0.199587	Higher in SVN
maternal_prot_dep_56	P10451	maternal_prot_dep_56__P10451	Maternal Plasma Proteome (Depleted)	5-6 months	prot_dep	-0.0701802	0.0701802	-0.037483	-0.29641	0.221444	0.775892	Lower in SVN
milk_metabolome_34	rLC_neg_mtb_5222700	milk_metabolome_34__rLC_neg_mtb_5222700	Milk Metabolome	3-4 months	milk_metabolome	-0.0681118	0.0681118	-0.0603012	-0.31917	0.198567	0.646932	Lower in SVN	220.028	362	negative
maternal_vams_56	vam_1007847	maternal_vams_56__vam_1007847	Maternal VAMS Metabolome (5-6m)	5-6 months	met_vams_maternal	-0.0673581	0.0673581	0.0390597	-0.219864	0.297984	0.766732	Higher in SVN	343.295	333	positive
maternal_gene_56	K07165	maternal_gene_56__K07165	Maternal Fecal Metagenome (Genes)	5-6 months	stool_gene_maternal	0.0650303	0.0650303	-0.0152045	-0.274163	0.243754	0.908074	Lower in SVN
stool_scfa_56	Acetate	stool_scfa_56__Acetate	Infant Fecal SCFAs	5-6 months	stool_scfa_infant	0.0648158	0.0648158	-0.259801	-0.516975	-0.00262735	0.0477204	Lower in SVN
milk_hmo_34	LNH_nmol/mL	milk_hmo_34__LNH_nmol/mL	Milk HMOs	3-4 months	hmos	-0.0615476	0.0615476	0.11918	-0.139409	0.377768	0.365075	Higher in SVN
maternal_prot_nav_56	P02786	maternal_prot_nav_56__P02786	Maternal Plasma Proteome (Naive)	5-6 months	prot_nav	-0.0599356	0.0599356	-0.0599649	-0.318834	0.198904	0.648769	Lower in SVN
milk_metabolome_34	rLC_neg_mtb_6513943	milk_metabolome_34__rLC_neg_mtb_6513943	Milk Metabolome	3-4 months	milk_metabolome	0.0586608	0.0586608	0.164319	-0.093931	0.422568	0.211444	Higher in SVN	729.442	482	negative
milk_taxa_34	Granulicatella.elegans.9	milk_taxa_34__Granulicatella.elegans.9	Milk Microbiome (Taxa)	3-4 months	milk_microbiome	0.0564911	0.0564911	-0.0596509	-0.318521	0.199219	0.650486	Lower in SVN
milk_targeted_34	Thr	milk_targeted_34__Thr	Milk Targeted Metabolites	3-4 months	targeted_metabolites	0.0560707	0.0560707	-0.106529	-0.365193	0.152136	0.418241	Lower in SVN
maternal_taxa_56	Unknown_CAG.302_1.5	maternal_taxa_56__Unknown_CAG.302_1.5	Maternal Fecal Microbiome (Taxa)	5-6 months	stool_microbiome_maternal	-0.0552528	0.0552528	-0.0310667	-0.290006	0.227872	0.813479	Lower in SVN
infant_vams_34	vam_2008911	infant_vams_34__vam_2008911	Infant VAMS Metabolome (3-4m)	3-4 months	met_vams_infant	-0.054495	0.054495	0.0845152	-0.17426	0.343291	0.520831	Higher in SVN	332.042	0.41	negative
milk_bioactive_34	Leptin	milk_bioactive_34__Leptin	Milk Bioactive Proteins	3-4 months	bioactive_proteins	0.0542073	0.0542073	-0.0881749	-0.346934	0.170584	0.502928	Lower in SVN
maternal_gene_56	K06921	maternal_gene_56__K06921	Maternal Fecal Metagenome (Genes)	5-6 months	stool_gene_maternal	-0.0517426	0.0517426	0.191014	-0.066984	0.449012	0.146134	Higher in SVN
milk_hmo_34	DSLNT_nmol/mL	milk_hmo_34__DSLNT_nmol/mL	Milk HMOs	3-4 months	hmos	-0.0504341	0.0504341	0.197203	-0.0607316	0.455137	0.13346	Higher in SVN
milk_metabolome_34	rLC_neg_mtb_5766539	milk_metabolome_34__rLC_neg_mtb_5766539	Milk Metabolome	3-4 months	milk_metabolome	0.0504295	0.0504295	0.0883628	-0.170395	0.347121	0.502018	Higher in SVN	629.369	428	negative
maternal_taxa_56	Prevotella.sp900553155	maternal_taxa_56__Prevotella.sp900553155	Maternal Fecal Microbiome (Taxa)	5-6 months	stool_microbiome_maternal	-0.0469818	0.0469818	0.310302	0.0538952	0.566708	0.0178738	Higher in SVN
milk_metabolome_34	rLC_neg_mtb_1856210	milk_metabolome_34__rLC_neg_mtb_1856210	Milk Metabolome	3-4 months	milk_metabolome	0.04646	0.04646	-0.0287065	-0.287649	0.230236	0.827419	Lower in SVN	461.17	153	negative
milk_hmo_34	LNnT_nmol/mL	milk_hmo_34__LNnT_nmol/mL	Milk HMOs	3-4 months	hmos	-0.0463844	0.0463844	0.00977026	-0.249192	0.268732	0.940853	Higher in SVN
milk_macro_micro_34	Cr	milk_macro_micro_34__Cr	Milk Macro- and Micronutrients	3-4 months	macro_micronutrients	-0.0461974	0.0461974	0.0854534	-0.173318	0.344225	0.516211	Higher in SVN
maternal_prot_dep_56	P33316	maternal_prot_dep_56__P33316	Maternal Plasma Proteome (Depleted)	5-6 months	prot_dep	0.0454982	0.0454982	-0.207557	-0.46538	0.0502664	0.11417	Lower in SVN
milk_metabolome_34	rLC_neg_mtb_2082576	milk_metabolome_34__rLC_neg_mtb_2082576	Milk Metabolome	3-4 months	milk_metabolome	-0.0453493	0.0453493	-0.0864436	-0.34521	0.172323	0.511357	Lower in SVN	130.022	176	negative	E586;E853	C16633;C01732;C00490	5-Fluorouridine;Mesaconate; 2-Methylfumarate; Mesaconic acid; Methylfumaric acid$Itaconate; Itaconic acid; Methylenesuccinic acid
maternal_prot_nav_56	P00748	maternal_prot_nav_56__P00748	Maternal Plasma Proteome (Naive)	5-6 months	prot_nav	-0.04477	0.04477	0.233567	-0.0239517	0.491085	0.0752829	Higher in SVN
milk_macro_micro_34	P	milk_macro_micro_34__P	Milk Macro- and Micronutrients	3-4 months	macro_micronutrients	-0.0442085	0.0442085	-0.0405095	-0.299431	0.218412	0.758337	Lower in SVN
milk_targeted_34	C3	milk_targeted_34__C3	Milk Targeted Metabolites	3-4 months	targeted_metabolites	-0.0435379	0.0435379	0.0480454	-0.210858	0.306949	0.715177	Higher in SVN
milk_metabolome_34	rLC_neg_mtb_5796434	milk_metabolome_34__rLC_neg_mtb_5796434	Milk Metabolome	3-4 months	milk_metabolome	0.0433601	0.0433601	0.0235089	-0.235441	0.282459	0.858301	Higher in SVN	628.371	426	negative
infant_vams_34	vam_2003102	infant_vams_34__vam_2003102	Infant VAMS Metabolome (3-4m)	3-4 months	met_vams_infant	0.043118	0.043118	0.0740046	-0.184815	0.332824	0.574002	Higher in SVN	188.982	627	negative
maternal_prot_nav_56	P23229	maternal_prot_nav_56__P23229	Maternal Plasma Proteome (Naive)	5-6 months	prot_nav	0.0418026	0.0418026	-0.0459846	-0.304893	0.212924	0.726896	Lower in SVN
maternal_prot_nav_56	Q4KWH8	maternal_prot_nav_56__Q4KWH8	Maternal Plasma Proteome (Naive)	5-6 months	prot_nav	-0.0413606	0.0413606	-0.0722552	-0.331082	0.186571	0.583094	Lower in SVN
maternal_taxa_56	Unknown_Sutterella.5	maternal_taxa_56__Unknown_Sutterella.5	Maternal Fecal Microbiome (Taxa)	5-6 months	stool_microbiome_maternal	-0.0411342	0.0411342	0.0480222	-0.210881	0.306926	0.715308	Higher in SVN
maternal_taxa_56	Bacteroides.uniformis	maternal_taxa_56__Bacteroides.uniformis	Maternal Fecal Microbiome (Taxa)	5-6 months	stool_microbiome_maternal	0.0407647	0.0407647	-0.123026	-0.38159	0.135538	0.349782	Lower in SVN
maternal_vams_56	vam_1006101	maternal_vams_56__vam_1006101	Maternal VAMS Metabolome (5-6m)	5-6 months	met_vams_maternal	0.0391919	0.0391919	-0.0752148	-0.33403	0.1836	0.567752	Lower in SVN	301.184	485	positive
milk_bioactive_34	FSH	milk_bioactive_34__FSH	Milk Bioactive Proteins	3-4 months	bioactive_proteins	0.0389155	0.0389155	-0.0611897	-0.320055	0.197676	0.642089	Lower in SVN
maternal_taxa_56	Unknown_Prevotella.10	maternal_taxa_56__Unknown_Prevotella.10	Maternal Fecal Microbiome (Taxa)	5-6 months	stool_microbiome_maternal	-0.03862	0.03862	0.191837	-0.0661532	0.449826	0.144398	Higher in SVN
maternal_prot_dep_56	P22891	maternal_prot_dep_56__P22891	Maternal Plasma Proteome (Depleted)	5-6 months	prot_dep	-0.0378339	0.0378339	-0.0863768	-0.345144	0.17239	0.511684	Lower in SVN
milk_macro_micro_34	K	milk_macro_micro_34__K	Milk Macro- and Micronutrients	3-4 months	macro_micronutrients	-0.037344	0.037344	-0.00905054	-0.268013	0.249912	0.945203	Lower in SVN
milk_taxa_34	Paracoccus.sp26	milk_taxa_34__Paracoccus.sp26	Milk Microbiome (Taxa)	3-4 months	milk_microbiome	0.0372427	0.0372427	-0.199942	-0.457848	0.0579635	0.128128	Lower in SVN
milk_metabolome_34	rLC_neg_mtb_7381549	milk_metabolome_34__rLC_neg_mtb_7381549	Milk Metabolome	3-4 months	milk_metabolome	0.036926	0.036926	-0.071959	-0.330787	0.186869	0.58464	Lower in SVN	739.483	539	negative
milk_metabolome_34	rLC_neg_mtb_6055174	milk_metabolome_34__rLC_neg_mtb_6055174	Milk Metabolome	3-4 months	milk_metabolome	0.036907	0.036907	-0.0382337	-0.297159	0.220692	0.771527	Lower in SVN	671.417	446	negative
maternal_vams_56	vam_2013518	maternal_vams_56__vam_2013518	Maternal VAMS Metabolome (5-6m)	5-6 months	met_vams_maternal	-0.0364998	0.0364998	-0.0104787	-0.26944	0.248483	0.936572	Lower in SVN	448.997	192	negative
maternal_vams_56	vam_1029763	maternal_vams_56__vam_1029763	Maternal VAMS Metabolome (5-6m)	5-6 months	met_vams_maternal	-0.0364742	0.0364742	0.167466	-0.0907556	0.425688	0.202801	Higher in SVN	787.755	629	positive
milk_targeted_34	FA.12.0.	milk_targeted_34__FA.12.0.	Milk Targeted Metabolites	3-4 months	targeted_metabolites	0.0358721	0.0358721	0.0702622	-0.188572	0.329096	0.593533	Higher in SVN
maternal_taxa_56	Odoribacter.splanchnicus	maternal_taxa_56__Odoribacter.splanchnicus	Maternal Fecal Microbiome (Taxa)	5-6 months	stool_microbiome_maternal	0.0349729	0.0349729	-0.0937094	-0.352442	0.165023	0.476481	Lower in SVN
milk_taxa_34	Piscicoccus.intestinalis.5	milk_taxa_34__Piscicoccus.intestinalis.5	Milk Microbiome (Taxa)	3-4 months	milk_microbiome	0.0345313	0.0345313	-0.172006	-0.430188	0.0861748	0.190791	Lower in SVN
milk_metabolome_34	rLC_neg_mtb_6362705	milk_metabolome_34__rLC_neg_mtb_6362705	Milk Metabolome	3-4 months	milk_metabolome	0.034032	0.034032	0.0569453	-0.201933	0.315824	0.665357	Higher in SVN	771.447	469	negative
infant_vams_34	vam_2024111	infant_vams_34__vam_2024111	Infant VAMS Metabolome (3-4m)	3-4 months	met_vams_infant	0.0338816	0.0338816	-0.147234	-0.405625	0.111157	0.262981	Lower in SVN	667.46	402	negative
maternal_prot_nav_56	Q8TF30	maternal_prot_nav_56__Q8TF30	Maternal Plasma Proteome (Naive)	5-6 months	prot_nav	0.0335805	0.0335805	0.150876	-0.107486	0.409238	0.25133	Higher in SVN
infant_vams_34	vam_1017082	infant_vams_34__vam_1017082	Infant VAMS Metabolome (3-4m)	3-4 months	met_vams_infant	-0.0334322	0.0334322	-0.0427885	-0.301705	0.216128	0.745198	Lower in SVN	540.588	523	positive
milk_metabolome_34	rLC_neg_mtb_7475795	milk_metabolome_34__rLC_neg_mtb_7475795	Milk Metabolome	3-4 months	milk_metabolome	0.033405	0.033405	0.0378264	-0.2211	0.296753	0.773895	Higher in SVN	809.505	546	negative
maternal_gene_56	K06416	maternal_gene_56__K06416	Maternal Fecal Metagenome (Genes)	5-6 months	stool_gene_maternal	-0.0330962	0.0330962	0.0310623	-0.227877	0.290001	0.813505	Higher in SVN
infant_vams_34	vam_1004896	infant_vams_34__vam_1004896	Infant VAMS Metabolome (3-4m)	3-4 months	met_vams_infant	0.0326381	0.0326381	0.0882207	-0.170538	0.346979	0.502706	Higher in SVN	269.129	327	positive
infant_gene_56	3003986	infant_gene_56__3003986	Infant Fecal Metagenome (Genes)	5-6 months	stool_gene_infant	-0.0324749	0.0324749	-0.18792	-0.44595	0.0701089	0.152803	Lower in SVN
maternal_vams_56	vam_2008339	maternal_vams_56__vam_2008339	Maternal VAMS Metabolome (5-6m)	5-6 months	met_vams_maternal	-0.0323734	0.0323734	-0.122928	-0.381493	0.135636	0.350164	Lower in SVN	323.19	404	negative
infant_gene_56	K01945	infant_gene_56__K01945	Infant Fecal Metagenome (Genes)	5-6 months	stool_gene_infant	-0.032046	0.032046	-0.200662	-0.45856	0.0572357	0.126754	Lower in SVN
infant_gene_56	K00609	infant_gene_56__K00609	Infant Fecal Metagenome (Genes)	5-6 months	stool_gene_infant	-0.0313828	0.0313828	-0.159716	-0.418005	0.0985732	0.224553	Lower in SVN
milk_hmo_34	DFLNT_nmol/mL	milk_hmo_34__DFLNT_nmol/mL	Milk HMOs	3-4 months	hmos	-0.031151	0.031151	0.221627	-0.0360361	0.479289	0.091539	Higher in SVN
milk_metabolome_34	rLC_neg_mtb_6882065	milk_metabolome_34__rLC_neg_mtb_6882065	Milk Metabolome	3-4 months	milk_metabolome	0.0310352	0.0310352	0.237896	-0.0195678	0.49536	0.0700017	Higher in SVN	781.492	521	negative
infant_gene_56	K01736	infant_gene_56__K01736	Infant Fecal Metagenome (Genes)	5-6 months	stool_gene_infant	-0.030803	0.030803	-0.172262	-0.430441	0.0859164	0.19013	Lower in SVN
milk_hmo_34	LSTc_nmol/mL	milk_hmo_34__LSTc_nmol/mL	Milk HMOs	3-4 months	hmos	-0.0306705	0.0306705	0.0953742	-0.16335	0.354098	0.468677	Higher in SVN
milk_metabolome_34	rLC_pos_mtb_5650084	milk_metabolome_34__rLC_pos_mtb_5650084	Milk Metabolome	3-4 months	milk_metabolome	0.0306403	0.0306403	0.0852806	-0.173492	0.344053	0.51706	Higher in SVN	636.557	374	positive
milk_taxa_34	Brevundimonas.terrae	milk_taxa_34__Brevundimonas.terrae	Milk Microbiome (Taxa)	3-4 months	milk_microbiome	0.0304621	0.0304621	-0.0377127	-0.29664	0.221214	0.774556	Lower in SVN
infant_gene_56	K02863	infant_gene_56__K02863	Infant Fecal Metagenome (Genes)	5-6 months	stool_gene_infant	-0.0295675	0.0295675	-0.163571	-0.421827	0.094685	0.213535	Lower in SVN
maternal_gene_56	CBM37_0	maternal_gene_56__CBM37_0	Maternal Fecal Metagenome (Genes)	5-6 months	stool_gene_maternal	0.0292891	0.0292891	0.0200162	-0.238938	0.27897	0.879178	Higher in SVN
infant_vams_34	vam_2001974	infant_vams_34__vam_2001974	Infant VAMS Metabolome (3-4m)	3-4 months	met_vams_infant	0.0289782	0.0289782	0.0898045	-0.168947	0.348556	0.495062	Higher in SVN	162.056	396	negative	E1222;E1674	C00180;C00633;C00082;CE2174	Benzoate; Benzoic acid; Benzenecarboxylic acid; Phenylformic acid; Dracylic acid$4-Hydroxybenzaldehyde; p-Hydroxybenzaldehyde;L-Tyrosine$
maternal_prot_nav_56	P02751	maternal_prot_nav_56__P02751	Maternal Plasma Proteome (Naive)	5-6 months	prot_nav	0.0288914	0.0288914	-0.0260917	-0.285038	0.232855	0.842925	Lower in SVN
milk_metabolome_34	rLC_neg_mtb_2670180	milk_metabolome_34__rLC_neg_mtb_2670180	Milk Metabolome	3-4 months	milk_metabolome	0.0284101	0.0284101	0.0213165	-0.237636	0.280269	0.871395	Higher in SVN	381.008	203	negative
milk_hmo_34	FLNH_nmol/mL	milk_hmo_34__FLNH_nmol/mL	Milk HMOs	3-4 months	hmos	0.0282304	0.0282304	-0.213192	-0.470952	0.0445685	0.10463	Lower in SVN
infant_gene_56	K01776	infant_gene_56__K01776	Infant Fecal Metagenome (Genes)	5-6 months	stool_gene_infant	-0.0280901	0.0280901	-0.208956	-0.466763	0.0488521	0.111741	Lower in SVN
maternal_prot_dep_56	P83105	maternal_prot_dep_56__P83105	Maternal Plasma Proteome (Depleted)	5-6 months	prot_dep	-0.0279391	0.0279391	-0.238488	-0.495945	0.0189681	0.0693035	Lower in SVN
milk_targeted_34	C12	milk_targeted_34__C12	Milk Targeted Metabolites	3-4 months	targeted_metabolites	0.027645	0.027645	-0.0108166	-0.269778	0.248145	0.934532	Lower in SVN
milk_taxa_34	Streptomyces_G_399870.sp4	milk_taxa_34__Streptomyces_G_399870.sp4	Milk Microbiome (Taxa)	3-4 months	milk_microbiome	-0.0270729	0.0270729	-0.0737105	-0.332531	0.18511	0.575526	Lower in SVN
milk_taxa_34	Unclassified.Burkholderiaceae_A_592522.sp1	milk_taxa_34__Unclassified.Burkholderiaceae_A_592522.sp1	Milk Microbiome (Taxa)	3-4 months	milk_microbiome	-0.0268175	0.0268175	-0.111578	-0.370213	0.147057	0.396498	Lower in SVN
milk_taxa_34	Microbispora.sp2	milk_taxa_34__Microbispora.sp2	Milk Microbiome (Taxa)	3-4 months	milk_microbiome	-0.0267673	0.0267673	-0.0746898	-0.333507	0.184127	0.570459	Lower in SVN
milk_taxa_34	Unclassified.Acetobacteraceae.sp17	milk_taxa_34__Unclassified.Acetobacteraceae.sp17	Milk Microbiome (Taxa)	3-4 months	milk_microbiome	-0.0267673	0.0267673	-0.111705	-0.37034	0.146929	0.395959	Lower in SVN
maternal_taxa_56	UMGS1225.sp900549725	maternal_taxa_56__UMGS1225.sp900549725	Maternal Fecal Microbiome (Taxa)	5-6 months	stool_microbiome_maternal	0.0267579	0.0267579	-0.0305306	-0.28947	0.228409	0.81664	Lower in SVN
maternal_prot_dep_56	P02654	maternal_prot_dep_56__P02654	Maternal Plasma Proteome (Depleted)	5-6 months	prot_dep	0.0267119	0.0267119	0.0493105	-0.20959	0.308211	0.708015	Higher in SVN
milk_taxa_34	Pseudokineococcus.lusitanus	milk_taxa_34__Pseudokineococcus.lusitanus	Milk Microbiome (Taxa)	3-4 months	milk_microbiome	-0.026536	0.026536	-0.0754183	-0.334232	0.183396	0.566704	Lower in SVN
milk_taxa_34	Neorhizobium.sp4	milk_taxa_34__Neorhizobium.sp4	Milk Microbiome (Taxa)	3-4 months	milk_microbiome	-0.0265023	0.0265023	-0.043043	-0.301958	0.215872	0.743736	Lower in SVN
infant_gene_56	K02911	infant_gene_56__K02911	Infant Fecal Metagenome (Genes)	5-6 months	stool_gene_infant	-0.0264825	0.0264825	-0.176305	-0.434447	0.0818364	0.179908	Lower in SVN
milk_taxa_34	Bacillus_A.sp3	milk_taxa_34__Bacillus_A.sp3	Milk Microbiome (Taxa)	3-4 months	milk_microbiome	-0.0264817	0.0264817	0.0402294	-0.218692	0.299151	0.759957	Higher in SVN
milk_taxa_34	Geodermatophilus_A.sp6	milk_taxa_34__Geodermatophilus_A.sp6	Milk Microbiome (Taxa)	3-4 months	milk_microbiome	-0.0264624	0.0264624	-0.140453	-0.398896	0.117989	0.285649	Lower in SVN
maternal_prot_dep_56	Q96KN2	maternal_prot_dep_56__Q96KN2	Maternal Plasma Proteome (Depleted)	5-6 months	prot_dep	-0.0264404	0.0264404	-0.158904	-0.4172	0.0993919	0.226924	Lower in SVN
maternal_prot_nav_56	P01704	maternal_prot_nav_56__P01704	Maternal Plasma Proteome (Naive)	5-6 months	prot_nav	-0.0262699	0.0262699	0.242095	-0.0153154	0.499506	0.0651728	Higher in SVN
maternal_prot_dep_56	Q7Z2W4	maternal_prot_dep_56__Q7Z2W4	Maternal Plasma Proteome (Depleted)	5-6 months	prot_dep	-0.0261524	0.0261524	-0.236295	-0.493779	0.0211896	0.071919	Lower in SVN
milk_metabolome_34	rLC_neg_mtb_6024122	milk_metabolome_34__rLC_neg_mtb_6024122	Milk Metabolome	3-4 months	milk_metabolome	0.0260924	0.0260924	-0.0928714	-0.351608	0.165865	0.480437	Lower in SVN	701.407	446	negative
milk_taxa_34	Bacillus_P_294101.sp10	milk_taxa_34__Bacillus_P_294101.sp10	Milk Microbiome (Taxa)	3-4 months	milk_microbiome	-0.0259153	0.0259153	0.0790656	-0.179734	0.337865	0.548082	Higher in SVN
maternal_taxa_56	Prevotella.sp900546535	maternal_taxa_56__Prevotella.sp900546535	Maternal Fecal Microbiome (Taxa)	5-6 months	stool_microbiome_maternal	-0.0258456	0.0258456	0.123072	-0.135491	0.381636	0.349599	Higher in SVN
milk_metabolome_34	rLC_neg_mtb_6362062	milk_metabolome_34__rLC_neg_mtb_6362062	Milk Metabolome	3-4 months	milk_metabolome	0.0255653	0.0255653	0.0405879	-0.218333	0.299509	0.757884	Higher in SVN	727.443	469	negative
milk_metabolome_34	rLC_pos_mtb_4640119	milk_metabolome_34__rLC_pos_mtb_4640119	Milk Metabolome	3-4 months	milk_metabolome	0.0254596	0.0254596	0.0589081	-0.199965	0.317781	0.654555	Higher in SVN	562.454	314	positive
milk_metabolome_34	rLC_neg_mtb_4851982	milk_metabolome_34__rLC_neg_mtb_4851982	Milk Metabolome	3-4 months	milk_metabolome	-0.025307	0.025307	-0.122367	-0.380936	0.136201	0.352371	Lower in SVN	145.029	364	negative	E299;E1790	C05838;C00811;C02763;C00166;C05851	cis-2-Hydroxycinnamate; 2-Coumarinate$4-Coumarate; p-Coumaric acid; trans-4-Hydroxycinnamate; trans-p-Hydroxycinnamate; 4-Hydroxycinnamic acid; 4-Hydroxycinnamate$enol-Phenylpyruvate$Phenylpyruvate;
milk_metabolome_34	rLC_neg_mtb_6850691	milk_metabolome_34__rLC_neg_mtb_6850691	Milk Metabolome	3-4 months	milk_metabolome	0.0250365	0.0250365	-0.000457639	-0.259422	0.258507	0.997227	Lower in SVN	642.483	502	negative
maternal_vams_56	vam_1036104	maternal_vams_56__vam_1036104	Maternal VAMS Metabolome (5-6m)	5-6 months	met_vams_maternal	-0.0250273	0.0250273	0.338591	0.082675	0.594507	0.00969302	Higher in SVN	894.55	0.55	positive
milk_bioactive_34	Insulin	milk_bioactive_34__Insulin	Milk Bioactive Proteins	3-4 months	bioactive_proteins	0.0247995	0.0247995	-0.00049752	-0.259462	0.258467	0.996985	Lower in SVN
maternal_taxa_56	Unknown_Zag1.6	maternal_taxa_56__Unknown_Zag1.6	Maternal Fecal Microbiome (Taxa)	5-6 months	stool_microbiome_maternal	0.0247157	0.0247157	0.183268	-0.0748068	0.441343	0.163262	Higher in SVN
maternal_prot_dep_56	Q9UGM5	maternal_prot_dep_56__Q9UGM5	Maternal Plasma Proteome (Depleted)	5-6 months	prot_dep	-0.0246203	0.0246203	-0.00468609	-0.26365	0.254278	0.971611	Lower in SVN
maternal_taxa_56	Unknown_Elusimicrobiaceae	maternal_taxa_56__Unknown_Elusimicrobiaceae	Maternal Fecal Microbiome (Taxa)	5-6 months	stool_microbiome_maternal	-0.0246195	0.0246195	0.0181524	-0.240803	0.277108	0.890354	Higher in SVN
maternal_taxa_56	Prevotella.sp900556795	maternal_taxa_56__Prevotella.sp900556795	Maternal Fecal Microbiome (Taxa)	5-6 months	stool_microbiome_maternal	-0.0245334	0.0245334	0.139578	-0.118871	0.398027	0.288667	Higher in SVN
maternal_prot_dep_56	Q96BQ1	maternal_prot_dep_56__Q96BQ1	Maternal Plasma Proteome (Depleted)	5-6 months	prot_dep	0.0245128	0.0245128	-0.188711	-0.446733	0.0693102	0.151077	Lower in SVN
milk_metabolome_34	rLC_neg_mtb_6673195	milk_metabolome_34__rLC_neg_mtb_6673195	Milk Metabolome	3-4 months	milk_metabolome	0.0241394	0.0241394	0.0448479	-0.214063	0.303759	0.733388	Higher in SVN	711.466	496	negative
infant_gene_56	K02838	infant_gene_56__K02838	Infant Fecal Metagenome (Genes)	5-6 months	stool_gene_infant	-0.0241187	0.0241187	-0.197775	-0.455703	0.0601536	0.132333	Lower in SVN
infant_vams_34	vam_1012585	infant_vams_34__vam_1012585	Infant VAMS Metabolome (3-4m)	3-4 months	met_vams_infant	0.0240544	0.0240544	-0.205363	-0.46321	0.0524844	0.118064	Lower in SVN	451.237	327	positive	E1336	C11131	2-Methoxy-estradiol-17beta 3-glucuronide
maternal_vams_56	vam_1000878	maternal_vams_56__vam_1000878	Maternal VAMS Metabolome (5-6m)	5-6 months	met_vams_maternal	-0.0239912	0.0239912	0.00447467	-0.254489	0.263439	0.972892	Higher in SVN	140.053	98	positive
milk_metabolome_34	rLC_neg_mtb_6790060	milk_metabolome_34__rLC_neg_mtb_6790060	Milk Metabolome	3-4 months	milk_metabolome	0.0239464	0.0239464	0.0625259	-0.196335	0.321387	0.634835	Higher in SVN	591.419	498	negative
infant_gene_56	K06997	infant_gene_56__K06997	Infant Fecal Metagenome (Genes)	5-6 months	stool_gene_infant	-0.0237359	0.0237359	-0.2339	-0.491415	0.0236138	0.0748647	Lower in SVN
infant_vams_34	vam_2001484	infant_vams_34__vam_2001484	Infant VAMS Metabolome (3-4m)	3-4 months	met_vams_infant	0.0236703	0.0236703	0.0673518	-0.191493	0.326196	0.608927	Higher in SVN	147.049	0.14	negative	E127	C00217;C00025;C05938	D-Glutamate; D-Glutamic acid; D-Glutaminic acid; D-2-Aminoglutaric acid$L-Glutamate$L-4-Hydroxyglutamate semialdehyde
milk_metabolome_34	rLC_neg_mtb_4710690	milk_metabolome_34__rLC_neg_mtb_4710690	Milk Metabolome	3-4 months	milk_metabolome	0.0234458	0.0234458	-0.0481776	-0.307081	0.210726	0.714428	Lower in SVN	387.219	343	negative
maternal_taxa_56	Megasphaera.elsdenii	maternal_taxa_56__Megasphaera.elsdenii	Maternal Fecal Microbiome (Taxa)	5-6 months	stool_microbiome_maternal	0.0234041	0.0234041	-0.207806	-0.465627	0.0500142	0.113734	Lower in SVN
maternal_prot_dep_56	P02786	maternal_prot_dep_56__P02786	Maternal Plasma Proteome (Depleted)	5-6 months	prot_dep	-0.0232858	0.0232858	0.0305921	-0.228348	0.289532	0.816277	Higher in SVN
infant_gene_56	K01784	infant_gene_56__K01784	Infant Fecal Metagenome (Genes)	5-6 months	stool_gene_infant	-0.022923	0.022923	-0.149263	-0.407638	0.109112	0.256445	Lower in SVN
milk_metabolome_34	rLC_pos_mtb_4778575	milk_metabolome_34__rLC_pos_mtb_4778575	Milk Metabolome	3-4 months	milk_metabolome	0.0225004	0.0225004	0.133003	-0.125493	0.3915	0.312028	Higher in SVN	548.477	322	positive
milk_metabolome_34	rLC_pos_mtb_5686298	milk_metabolome_34__rLC_pos_mtb_5686298	Milk Metabolome	3-4 months	milk_metabolome	0.0224911	0.0224911	0.0585406	-0.200333	0.317414	0.656572	Higher in SVN	642.517	374	positive
milk_macro_micro_34	Se	milk_macro_micro_34__Se	Milk Macro- and Micronutrients	3-4 months	macro_micronutrients	0.022375	0.022375	0.00826088	-0.250702	0.267224	0.949977	Higher in SVN
milk_metabolome_34	rLC_neg_mtb_5254005	milk_metabolome_34__rLC_neg_mtb_5254005	Milk Metabolome	3-4 months	milk_metabolome	0.0222859	0.0222859	0.0760836	-0.182728	0.334895	0.563285	Higher in SVN	438.225	382	negative	E295	leuktrE4	leukotriene E4
infant_gene_56	K00604	infant_gene_56__K00604	Infant Fecal Metagenome (Genes)	5-6 months	stool_gene_infant	-0.0220678	0.0220678	-0.191007	-0.449005	0.0669911	0.146148	Lower in SVN
maternal_taxa_56	Unknown_CAG.269.25	maternal_taxa_56__Unknown_CAG.269.25	Maternal Fecal Microbiome (Taxa)	5-6 months	stool_microbiome_maternal	-0.0219112	0.0219112	0.187803	-0.0702273	0.445834	0.15306	Higher in SVN
infant_gene_56	K02946	infant_gene_56__K02946	Infant Fecal Metagenome (Genes)	5-6 months	stool_gene_infant	-0.0218327	0.0218327	-0.174043	-0.432205	0.0841197	0.185577	Lower in SVN
maternal_vams_56	vam_2000460	maternal_vams_56__vam_2000460	Maternal VAMS Metabolome (5-6m)	5-6 months	met_vams_maternal	-0.0216464	0.0216464	-0.0389411	-0.297865	0.219983	0.76742	Lower in SVN	114.056	163	negative	E1638	CE4788;C00763;C00148	acetamidopropanal$D-Proline$L-Proline
maternal_vams_56	vam_1008714	maternal_vams_56__vam_1008714	Maternal VAMS Metabolome (5-6m)	5-6 months	met_vams_maternal	-0.0214207	0.0214207	-0.0765781	-0.335388	0.182231	0.56075	Lower in SVN	365.136	358	positive	E1381	CE3140
maternal_vams_56	vam_2002039	maternal_vams_56__vam_2002039	Maternal VAMS Metabolome (5-6m)	5-6 months	met_vams_maternal	-0.0214183	0.0214183	0.359826	0.104307	0.615345	0.00594241	Higher in SVN	164.004	621	negative
maternal_taxa_56	Unknown_CAG.95	maternal_taxa_56__Unknown_CAG.95	Maternal Fecal Microbiome (Taxa)	5-6 months	stool_microbiome_maternal	0.0212268	0.0212268	-0.0510747	-0.30997	0.207821	0.698071	Lower in SVN
maternal_prot_dep_56	Q9BYI3	maternal_prot_dep_56__Q9BYI3	Maternal Plasma Proteome (Depleted)	5-6 months	prot_dep	-0.0212168	0.0212168	-0.0199403	-0.278894	0.239014	0.879633	Lower in SVN
milk_targeted_34	C12.1	milk_targeted_34__C12.1	Milk Targeted Metabolites	3-4 months	targeted_metabolites	0.0211866	0.0211866	0.0503258	-0.208572	0.309223	0.702286	Higher in SVN
maternal_prot_nav_56	P80748	maternal_prot_nav_56__P80748	Maternal Plasma Proteome (Naive)	5-6 months	prot_nav	-0.0208245	0.0208245	0.0278313	-0.231113	0.286775	0.832601	Higher in SVN
milk_metabolome_34	rLC_neg_mtb_6673467	milk_metabolome_34__rLC_neg_mtb_6673467	Milk Metabolome	3-4 months	milk_metabolome	0.0207555	0.0207555	0.0768692	-0.181939	0.335677	0.55926	Higher in SVN	727.478	496	negative
milk_targeted_34	X3.Met.His	milk_targeted_34__X3.Met.His	Milk Targeted Metabolites	3-4 months	targeted_metabolites	-0.0206915	0.0206915	-0.0331458	-0.292081	0.22579	0.801248	Lower in SVN
milk_targeted_34	AA	milk_targeted_34__AA	Milk Targeted Metabolites	3-4 months	targeted_metabolites	0.0205629	0.0205629	0.162277	-0.0959906	0.420544	0.21719	Higher in SVN
milk_targeted_34	DG.18.2_18.3.	milk_targeted_34__DG.18.2_18.3.	Milk Targeted Metabolites	3-4 months	targeted_metabolites	0.0205157	0.0205157	0.0928162	-0.16592	0.351553	0.480698	Higher in SVN
milk_metabolome_34	rLC_neg_mtb_5356550	milk_metabolome_34__rLC_neg_mtb_5356550	Milk Metabolome	3-4 months	milk_metabolome	0.0204325	0.0204325	-0.0324099	-0.291347	0.226527	0.805572	Lower in SVN	661.471	399	negative
maternal_gene_56	K09607	maternal_gene_56__K09607	Maternal Fecal Metagenome (Genes)	5-6 months	stool_gene_maternal	-0.0202731	0.0202731	0.161102	-0.0971754	0.41938	0.220546	Higher in SVN
maternal_gene_56	K12063	maternal_gene_56__K12063	Maternal Fecal Metagenome (Genes)	5-6 months	stool_gene_maternal	-0.0201941	0.0201941	0.00511227	-0.253851	0.264076	0.969031	Higher in SVN
maternal_gene_56	K02429	maternal_gene_56__K02429	Maternal Fecal Metagenome (Genes)	5-6 months	stool_gene_maternal	-0.0200513	0.0200513	0.228228	-0.0293555	0.485812	0.0822351	Higher in SVN
milk_metabolome_34	rLC_pos_mtb_5993217	milk_metabolome_34__rLC_pos_mtb_5993217	Milk Metabolome	3-4 months	milk_metabolome	0.0198608	0.0198608	0.117794	-0.140803	0.376391	0.370684	Higher in SVN	551.505	391	positive
infant_vams_34	vam_2011438	infant_vams_34__vam_2011438	Infant VAMS Metabolome (3-4m)	3-4 months	met_vams_infant	-0.0197735	0.0197735	-0.104755	-0.36343	0.153919	0.42604	Lower in SVN	402.046	381	negative
maternal_gene_56	K20829	maternal_gene_56__K20829	Maternal Fecal Metagenome (Genes)	5-6 months	stool_gene_maternal	0.0197357	0.0197357	-0.155479	-0.413804	0.102845	0.237121	Lower in SVN
milk_metabolome_34	rLC_neg_mtb_6055960	milk_metabolome_34__rLC_neg_mtb_6055960	Milk Metabolome	3-4 months	milk_metabolome	0.0195886	0.0195886	0.0788971	-0.179903	0.337697	0.548936	Higher in SVN	699.412	446	negative
milk_targeted_34	DG.14.0_18.2.	milk_targeted_34__DG.14.0_18.2.	Milk Targeted Metabolites	3-4 months	targeted_metabolites	0.0194153	0.0194153	0.12528	-0.133269	0.383829	0.341009	Higher in SVN
maternal_prot_dep_56	Q9GZU5	maternal_prot_dep_56__Q9GZU5	Maternal Plasma Proteome (Depleted)	5-6 months	prot_dep	-0.0192583	0.0192583	-0.103196	-0.361879	0.155487	0.432966	Lower in SVN
maternal_vams_56	vam_1005424	maternal_vams_56__vam_1005424	Maternal VAMS Metabolome (5-6m)	5-6 months	met_vams_maternal	-0.0192456	0.0192456	-0.0715413	-0.33037	0.187288	0.586823	Lower in SVN	283.283	363	positive
infant_gene_56	K00962	infant_gene_56__K00962	Infant Fecal Metagenome (Genes)	5-6 months	stool_gene_infant	-0.0191796	0.0191796	-0.146584	-0.40498	0.111811	0.265097	Lower in SVN
maternal_prot_nav_56	O14975	maternal_prot_nav_56__O14975	Maternal Plasma Proteome (Naive)	5-6 months	prot_nav	-0.0190929	0.0190929	-0.163756	-0.422011	0.0944981	0.213015	Lower in SVN
milk_metabolome_34	rLC_pos_mtb_4742854	milk_metabolome_34__rLC_pos_mtb_4742854	Milk Metabolome	3-4 months	milk_metabolome	0.0187945	0.0187945	0.128037	-0.130494	0.386568	0.330472	Higher in SVN	582.507	333	positive
infant_gene_56	K02601	infant_gene_56__K02601	Infant Fecal Metagenome (Genes)	5-6 months	stool_gene_infant	-0.018768	0.018768	-0.152272	-0.410623	0.106078	0.246958	Lower in SVN
milk_macro_micro_34	g.tocopherol	milk_macro_micro_34__g.tocopherol	Milk Macro- and Micronutrients	3-4 months	macro_micronutrients	-0.0187497	0.0187497	-0.135957	-0.394432	0.122518	0.301385	Lower in SVN
infant_gene_56	K01885	infant_gene_56__K01885	Infant Fecal Metagenome (Genes)	5-6 months	stool_gene_infant	-0.0185051	0.0185051	-0.15151	-0.409867	0.106847	0.249338	Lower in SVN
maternal_vams_56	vam_1032131	maternal_vams_56__vam_1032131	Maternal VAMS Metabolome (5-6m)	5-6 months	met_vams_maternal	-0.0184875	0.0184875	0.209367	-0.0484364	0.46717	0.111034	Higher in SVN	824.27	0.6	positive
maternal_gene_56	K09117	maternal_gene_56__K09117	Maternal Fecal Metagenome (Genes)	5-6 months	stool_gene_maternal	-0.0183428	0.0183428	0.0839981	-0.17478	0.342776	0.523387	Higher in SVN
maternal_gene_56	K02086	maternal_gene_56__K02086	Maternal Fecal Metagenome (Genes)	5-6 months	stool_gene_maternal	-0.0183365	0.0183365	0.0299293	-0.229011	0.28887	0.820189	Higher in SVN
infant_vams_34	vam_1039435	infant_vams_34__vam_1039435	Infant VAMS Metabolome (3-4m)	3-4 months	met_vams_infant	0.018285	0.018285	0.0390237	-0.219901	0.297948	0.766941	Higher in SVN	961.934	765	positive
maternal_prot_nav_56	P01709	maternal_prot_nav_56__P01709	Maternal Plasma Proteome (Naive)	5-6 months	prot_nav	-0.01827	0.01827	0.0242149	-0.234734	0.283164	0.854092	Higher in SVN
maternal_prot_dep_56	Q9UK55	maternal_prot_dep_56__Q9UK55	Maternal Plasma Proteome (Depleted)	5-6 months	prot_dep	-0.018242	0.018242	0.00980547	-0.249156	0.268767	0.94064	Higher in SVN
maternal_prot_dep_56	P00709	maternal_prot_dep_56__P00709	Maternal Plasma Proteome (Depleted)	5-6 months	prot_dep	-0.018122	0.018122	-0.12099	-0.379568	0.137587	0.357824	Lower in SVN
maternal_vams_56	vam_1020674	maternal_vams_56__vam_1020674	Maternal VAMS Metabolome (5-6m)	5-6 months	met_vams_maternal	-0.0178106	0.0178106	0.0704209	-0.188412	0.329254	0.592698	Higher in SVN	629.417	542	positive
maternal_vams_56	vam_2011000	maternal_vams_56__vam_2011000	Maternal VAMS Metabolome (5-6m)	5-6 months	met_vams_maternal	-0.017777	0.017777	0.079163	-0.179636	0.337962	0.547589	Higher in SVN	389.289	0.49	negative
maternal_taxa_56	UMGS973.sp900547295	maternal_taxa_56__UMGS973.sp900547295	Maternal Fecal Microbiome (Taxa)	5-6 months	stool_microbiome_maternal	0.0177473	0.0177473	-0.165132	-0.423375	0.0931104	0.209185	Lower in SVN
milk_metabolome_34	rLC_pos_mtb_4313899	milk_metabolome_34__rLC_pos_mtb_4313899	Milk Metabolome	3-4 months	milk_metabolome	0.0177251	0.0177251	0.0463954	-0.212512	0.305303	0.724555	Higher in SVN	337.275	324	positive
infant_gene_56	K02959	infant_gene_56__K02959	Infant Fecal Metagenome (Genes)	5-6 months	stool_gene_infant	-0.0177095	0.0177095	-0.181989	-0.440077	0.0760983	0.16623	Lower in SVN
milk_targeted_34	DG.14.0_18.1.	milk_targeted_34__DG.14.0_18.1.	Milk Targeted Metabolites	3-4 months	targeted_metabolites	0.017579	0.017579	0.0546782	-0.204207	0.313564	0.677919	Higher in SVN
maternal_vams_56	vam_2004206	maternal_vams_56__vam_2004206	Maternal VAMS Metabolome (5-6m)	5-6 months	met_vams_maternal	0.0175576	0.0175576	0.223791	-0.0338463	0.481428	0.0884005	Higher in SVN	225.984	133	negative
maternal_gene_56	K06402	maternal_gene_56__K06402	Maternal Fecal Metagenome (Genes)	5-6 months	stool_gene_maternal	-0.017555	0.017555	-0.0149417	-0.2739	0.244017	0.909656	Lower in SVN
infant_gene_56	K02899	infant_gene_56__K02899	Infant Fecal Metagenome (Genes)	5-6 months	stool_gene_infant	-0.0175083	0.0175083	-0.182178	-0.440264	0.0759073	0.165789	Lower in SVN
infant_gene_56	K00215	infant_gene_56__K00215	Infant Fecal Metagenome (Genes)	5-6 months	stool_gene_infant	-0.0175021	0.0175021	-0.19036	-0.448365	0.0676445	0.147525	Lower in SVN
infant_vams_34	vam_1038363	infant_vams_34__vam_1038363	Infant VAMS Metabolome (3-4m)	3-4 months	met_vams_infant	0.0172414	0.0172414	0.0292595	-0.229682	0.288201	0.824148	Higher in SVN	938.929	623	positive
milk_macro_micro_34	T	milk_macro_micro_34__T	Milk Macro- and Micronutrients	3-4 months	macro_micronutrients	-0.0171708	0.0171708	0.138947	-0.119507	0.3974	0.290858	Higher in SVN
maternal_vams_56	vam_2009752	maternal_vams_56__vam_2009752	Maternal VAMS Metabolome (5-6m)	5-6 months	met_vams_maternal	-0.0170641	0.0170641	-0.109989	-0.368633	0.148656	0.403267	Lower in SVN	353.201	402	negative	E368	CE5653	4-oxo-9-cis-retinoate
milk_metabolome_34	rLC_neg_mtb_6733234	milk_metabolome_34__rLC_neg_mtb_6733234	Milk Metabolome	3-4 months	milk_metabolome	0.0169939	0.0169939	0.0717376	-0.187091	0.330566	0.585797	Higher in SVN	757.472	496	negative
milk_hmo_34	DFLac_nmol/mL	milk_hmo_34__DFLac_nmol/mL	Milk HMOs	3-4 months	hmos	-0.0169807	0.0169807	0.132209	-0.126293	0.390711	0.314933	Higher in SVN
milk_metabolome_34	rLC_pos_mtb_5686290	milk_metabolome_34__rLC_pos_mtb_5686290	Milk Metabolome	3-4 months	milk_metabolome	0.0169118	0.0169118	-0.149949	-0.408319	0.10842	0.25426	Lower in SVN	641.513	0.38	positive
infant_gene_56	K07042	infant_gene_56__K07042	Infant Fecal Metagenome (Genes)	5-6 months	stool_gene_infant	-0.0166576	0.0166576	-0.19482	-0.452779	0.0631395	0.138236	Lower in SVN
infant_vams_34	vam_1023355	infant_vams_34__vam_1023355	Infant VAMS Metabolome (3-4m)	3-4 months	met_vams_infant	-0.0165434	0.0165434	0.043791	-0.215123	0.302705	0.739442	Higher in SVN	674.289	521	positive
infant_vams_34	vam_1038341	infant_vams_34__vam_1038341	Infant VAMS Metabolome (3-4m)	3-4 months	met_vams_infant	0.0164244	0.0164244	0.0372681	-0.22166	0.296196	0.777144	Higher in SVN	938.599	619	positive
maternal_taxa_56	Unknown_SFFH01.2	maternal_taxa_56__Unknown_SFFH01.2	Maternal Fecal Microbiome (Taxa)	5-6 months	stool_microbiome_maternal	-0.0164194	0.0164194	0.0134735	-0.245486	0.272433	0.918501	Higher in SVN
milk_metabolome_34	rLC_pos_mtb_5718445	milk_metabolome_34__rLC_pos_mtb_5718445	Milk Metabolome	3-4 months	milk_metabolome	0.016408	0.016408	0.0961609	-0.162559	0.354881	0.465014	Higher in SVN	602.524	0.38	positive
milk_taxa_34	Pseudomonas_B_650451.sp1	milk_taxa_34__Pseudomonas_B_650451.sp1	Milk Microbiome (Taxa)	3-4 months	milk_microbiome	0.0163658	0.0163658	-0.127861	-0.386393	0.130671	0.33114	Lower in SVN
maternal_gene_56	K13280	maternal_gene_56__K13280	Maternal Fecal Metagenome (Genes)	5-6 months	stool_gene_maternal	-0.0162764	0.0162764	-0.042029	-0.300947	0.216889	0.749569	Lower in SVN
milk_metabolome_34	rLC_neg_mtb_1696574	milk_metabolome_34__rLC_neg_mtb_1696574	Milk Metabolome	3-4 months	milk_metabolome	-0.0162689	0.0162689	0.00753824	-0.251425	0.266501	0.954348	Higher in SVN	174.014	172	negative
maternal_prot_nav_56	Q08380	maternal_prot_nav_56__Q08380	Maternal Plasma Proteome (Naive)	5-6 months	prot_nav	0.0162657	0.0162657	0.0531645	-0.205725	0.312054	0.686358	Higher in SVN
milk_metabolome_34	rLC_pos_mtb_4221163	milk_metabolome_34__rLC_pos_mtb_4221163	Milk Metabolome	3-4 months	milk_metabolome	0.0161985	0.0161985	0.0407476	-0.218173	0.299668	0.756961	Higher in SVN	493.426	287	positive
milk_macro_micro_34	FAD	milk_macro_micro_34__FAD	Milk Macro- and Micronutrients	3-4 months	macro_micronutrients	-0.0161123	0.0161123	0.155081	-0.103247	0.413409	0.238327	Higher in SVN
milk_metabolome_34	rLC_neg_mtb_5672426	milk_metabolome_34__rLC_neg_mtb_5672426	Milk Metabolome	3-4 months	milk_metabolome	-0.0160929	0.0160929	-0.0812366	-0.340027	0.177553	0.537142	Lower in SVN	193.031	409	negative
maternal_vams_56	vam_2003610	maternal_vams_56__vam_2003610	Maternal VAMS Metabolome (5-6m)	5-6 months	met_vams_maternal	0.0159786	0.0159786	0.259255	0.00207327	0.516436	0.0481937	Higher in SVN	205.033	0.14	negative	E88	C00026	2-Oxoglutarate
infant_gene_56	K03631	infant_gene_56__K03631	Infant Fecal Metagenome (Genes)	5-6 months	stool_gene_infant	-0.0158798	0.0158798	-0.228387	-0.485969	0.0291946	0.0820208	Lower in SVN
maternal_gene_56	K01246	maternal_gene_56__K01246	Maternal Fecal Metagenome (Genes)	5-6 months	stool_gene_maternal	-0.01584	0.01584	0.0413009	-0.217618	0.30022	0.753766	Higher in SVN
infant_vams_34	vam_1006580	infant_vams_34__vam_1006580	Infant VAMS Metabolome (3-4m)	3-4 months	met_vams_infant	0.0157703	0.0157703	0.044917	-0.213994	0.303828	0.732993	Higher in SVN	313.079	319	positive
stool_scfa_56	Isocaproate	stool_scfa_56__Isocaproate	Infant Fecal SCFAs	5-6 months	stool_scfa_infant	0.0155384	0.0155384	0.153835	-0.104503	0.412173	0.24213	Higher in SVN
infant_vams_34	vam_1031376	infant_vams_34__vam_1031376	Infant VAMS Metabolome (3-4m)	3-4 months	met_vams_infant	0.0155307	0.0155307	0.0577511	-0.201125	0.316627	0.660914	Higher in SVN	809.586	492	positive
infant_gene_56	K01923	infant_gene_56__K01923	Infant Fecal Metagenome (Genes)	5-6 months	stool_gene_infant	-0.0154818	0.0154818	-0.232705	-0.490234	0.0248245	0.0763723	Lower in SVN
infant_gene_56	K02986	infant_gene_56__K02986	Infant Fecal Metagenome (Genes)	5-6 months	stool_gene_infant	-0.0154698	0.0154698	-0.19283	-0.45081	0.0651497	0.142324	Lower in SVN
maternal_vams_56	vam_2010083	maternal_vams_56__vam_2010083	Maternal VAMS Metabolome (5-6m)	5-6 months	met_vams_maternal	0.0154496	0.0154496	-0.0181513	-0.277107	0.240804	0.890361	Lower in SVN	363.073	0.15	negative
milk_hmo_34	3'SL_nmol/mL	milk_hmo_34__3'SL_nmol/mL	Milk HMOs	3-4 months	hmos	-0.0153722	0.0153722	0.188272	-0.0697538	0.446298	0.152034	Higher in SVN
maternal_vams_56	vam_1026513	maternal_vams_56__vam_1026513	Maternal VAMS Metabolome (5-6m)	5-6 months	met_vams_maternal	-0.0153678	0.0153678	-0.0454692	-0.304379	0.213441	0.729837	Lower in SVN	724.717	552	positive
milk_hmo_34	LNT_nmol/mL	milk_hmo_34__LNT_nmol/mL	Milk HMOs	3-4 months	hmos	-0.0153091	0.0153091	-0.00547017	-0.264434	0.253493	0.966864	Lower in SVN
maternal_vams_56	vam_1001834	maternal_vams_56__vam_1001834	Maternal VAMS Metabolome (5-6m)	5-6 months	met_vams_maternal	-0.0152989	0.0152989	-0.044906	-0.303817	0.214005	0.733056	Lower in SVN	173.08	456	positive
maternal_prot_dep_56	P10124	maternal_prot_dep_56__P10124	Maternal Plasma Proteome (Depleted)	5-6 months	prot_dep	-0.0152879	0.0152879	0.27677	0.0198388	0.533702	0.0348448	Higher in SVN
infant_vams_34	vam_1010693	infant_vams_34__vam_1010693	Infant VAMS Metabolome (3-4m)	3-4 months	met_vams_infant	-0.0152683	0.0152683	-0.0290748	-0.288017	0.229867	0.82524	Lower in SVN	406.278	358	positive
maternal_taxa_56	Unknown_UBA644_2.2	maternal_taxa_56__Unknown_UBA644_2.2	Maternal Fecal Microbiome (Taxa)	5-6 months	stool_microbiome_maternal	0.0152668	0.0152668	0.0371756	-0.221752	0.296103	0.777682	Higher in SVN
maternal_vams_56	vam_1001838	maternal_vams_56__vam_1001838	Maternal VAMS Metabolome (5-6m)	5-6 months	met_vams_maternal	0.0151409	0.0151409	-0.0288864	-0.287829	0.230056	0.826354	Lower in SVN	173.117	0.34	positive	E357;E738	CE2576;CE2577
maternal_vams_56	vam_1039689	maternal_vams_56__vam_1039689	Maternal VAMS Metabolome (5-6m)	5-6 months	met_vams_maternal	-0.0151228	0.0151228	0.162073	-0.0961961	0.420342	0.21777	Higher in SVN	970.949	585	positive
infant_gene_56	K01925	infant_gene_56__K01925	Infant Fecal Metagenome (Genes)	5-6 months	stool_gene_infant	-0.0149587	0.0149587	-0.243031	-0.50043	0.0143671	0.0641343	Lower in SVN
maternal_prot_nav_56	P05408	maternal_prot_nav_56__P05408	Maternal Plasma Proteome (Naive)	5-6 months	prot_nav	-0.0149516	0.0149516	-0.213388	-0.471146	0.0443699	0.104309	Lower in SVN
milk_metabolome_34	rLC_neg_mtb_5066594	milk_metabolome_34__rLC_neg_mtb_5066594	Milk Metabolome	3-4 months	milk_metabolome	0.0149404	0.0149404	0.183696	-0.0743751	0.441767	0.162279	Higher in SVN	385.191	368	negative
maternal_prot_nav_56	Q9HC36	maternal_prot_nav_56__Q9HC36	Maternal Plasma Proteome (Naive)	5-6 months	prot_nav	0.0148741	0.0148741	-0.134429	-0.392915	0.124058	0.306861	Lower in SVN
infant_gene_56	K06925	infant_gene_56__K06925	Infant Fecal Metagenome (Genes)	5-6 months	stool_gene_infant	-0.0148187	0.0148187	-0.229805	-0.48737	0.0277599	0.0801302	Lower in SVN
milk_targeted_34	DG.16.1_18.2.	milk_targeted_34__DG.16.1_18.2.	Milk Targeted Metabolites	3-4 months	targeted_metabolites	0.0147933	0.0147933	0.212434	-0.0453348	0.470203	0.105875	Higher in SVN
milk_taxa_34	Corynebacterium.riegelii	milk_taxa_34__Corynebacterium.riegelii	Milk Microbiome (Taxa)	3-4 months	milk_microbiome	0.0147816	0.0147816	0.18121	-0.0768852	0.439305	0.168058	Higher in SVN
maternal_vams_56	vam_1028326	maternal_vams_56__vam_1028326	Maternal VAMS Metabolome (5-6m)	5-6 months	met_vams_maternal	-0.0146815	0.0146815	-0.0212357	-0.280188	0.237717	0.871878	Lower in SVN	759.247	0.59	positive
milk_metabolome_34	rLC_neg_mtb_6823994	milk_metabolome_34__rLC_neg_mtb_6823994	Milk Metabolome	3-4 months	milk_metabolome	0.0145422	0.0145422	0.106049	-0.152618	0.364716	0.420343	Higher in SVN	781.489	502	negative
milk_taxa_34	Unclassified.Weeksellaceae.sp4	milk_taxa_34__Unclassified.Weeksellaceae.sp4	Milk Microbiome (Taxa)	3-4 months	milk_microbiome	-0.0145154	0.0145154	0.1944	-0.0635631	0.452364	0.13909	Higher in SVN
milk_targeted_34	TMAO	milk_targeted_34__TMAO	Milk Targeted Metabolites	3-4 months	targeted_metabolites	-0.0144832	0.0144832	-0.220944	-0.478615	0.0367268	0.0925473	Lower in SVN
milk_hmo_34	DFLNH_nmol/mL	milk_hmo_34__DFLNH_nmol/mL	Milk HMOs	3-4 months	hmos	0.0144677	0.0144677	0.0175245	-0.241432	0.276481	0.894124	Higher in SVN
infant_gene_56	K01892	infant_gene_56__K01892	Infant Fecal Metagenome (Genes)	5-6 months	stool_gene_infant	-0.014416	0.014416	-0.157863	-0.416167	0.100442	0.229992	Lower in SVN
infant_vams_34	vam_2009609	infant_vams_34__vam_2009609	Infant VAMS Metabolome (3-4m)	3-4 months	met_vams_infant	-0.0143609	0.0143609	0.000712444	-0.258252	0.259677	0.995683	Higher in SVN	349.093	158	negative
maternal_gene_56	K07813	maternal_gene_56__K07813	Maternal Fecal Metagenome (Genes)	5-6 months	stool_gene_maternal	-0.0143104	0.0143104	0.0190747	-0.23988	0.27803	0.884821	Higher in SVN
infant_gene_56	K18189	infant_gene_56__K18189	Infant Fecal Metagenome (Genes)	5-6 months	stool_gene_infant	-0.0143073	0.0143073	-0.210446	-0.468237	0.0473451	0.109197	Lower in SVN
infant_gene_56	K00945	infant_gene_56__K00945	Infant Fecal Metagenome (Genes)	5-6 months	stool_gene_infant	-0.0142915	0.0142915	-0.212209	-0.469981	0.0455618	0.106246	Lower in SVN
infant_vams_34	vam_1011861	infant_vams_34__vam_1011861	Infant VAMS Metabolome (3-4m)	3-4 months	met_vams_infant	0.0142517	0.0142517	-0.0726639	-0.331489	0.186161	0.580964	Lower in SVN	433.21	333	positive	E2157	C15646	1-(1-Alkenyl)-sn-glycero-3-phosphate
milk_metabolome_34	rLC_neg_mtb_1267737	milk_metabolome_34__rLC_neg_mtb_1267737	Milk Metabolome	3-4 months	milk_metabolome	0.0141863	0.0141863	-0.171227	-0.429415	0.0869613	0.192815	Lower in SVN	773.75	97	negative
infant_gene_56	K02338	infant_gene_56__K02338	Infant Fecal Metagenome (Genes)	5-6 months	stool_gene_infant	-0.0140531	0.0140531	-0.248958	-0.506279	0.00836307	0.0578709	Lower in SVN
milk_metabolome_34	rLC_neg_mtb_6850217	milk_metabolome_34__rLC_neg_mtb_6850217	Milk Metabolome	3-4 months	milk_metabolome	0.013974	0.013974	0.038732	-0.220193	0.297657	0.768633	Higher in SVN	617.436	0.5	negative
maternal_prot_nav_56	P01700	maternal_prot_nav_56__P01700	Maternal Plasma Proteome (Naive)	5-6 months	prot_nav	-0.0138664	0.0138664	0.179052	-0.0790632	0.437168	0.173197	Higher in SVN
maternal_taxa_56	Unknown_CAG.269.26	maternal_taxa_56__Unknown_CAG.269.26	Maternal Fecal Microbiome (Taxa)	5-6 months	stool_microbiome_maternal	-0.0138642	0.0138642	-0.128815	-0.387341	0.12971	0.327537	Lower in SVN
infant_gene_56	K00826	infant_gene_56__K00826	Infant Fecal Metagenome (Genes)	5-6 months	stool_gene_infant	-0.0138469	0.0138469	-0.164147	-0.422398	0.0941042	0.211923	Lower in SVN
maternal_vams_56	vam_2000949	maternal_vams_56__vam_2000949	Maternal VAMS Metabolome (5-6m)	5-6 months	met_vams_maternal	0.0137862	0.0137862	-0.211496	-0.469276	0.046283	0.107432	Lower in SVN	137.024	283	negative	E652;E676	C05585;C00156;C00180;C00633	Gentisate aldehyde$4-Hydroxybenzoate;Benzoate; Benzoic acid; Benzenecarboxylic acid; Phenylformic acid; Dracylic acid$4-Hydroxybenzaldehyde; p-Hydroxybenzaldehyde
maternal_prot_dep_56	P08519	maternal_prot_dep_56__P08519	Maternal Plasma Proteome (Depleted)	5-6 months	prot_dep	0.0137089	0.0137089	0.208658	-0.049153	0.466469	0.112254	Higher in SVN
maternal_taxa_56	Unknown_UBA7642	maternal_taxa_56__Unknown_UBA7642	Maternal Fecal Microbiome (Taxa)	5-6 months	stool_microbiome_maternal	-0.013673	0.013673	0.100947	-0.157747	0.359642	0.443069	Higher in SVN
milk_metabolome_34	rLC_neg_mtb_5846344	milk_metabolome_34__rLC_neg_mtb_5846344	Milk Metabolome	3-4 months	milk_metabolome	-0.01356	0.01356	-0.0780166	-0.33682	0.180787	0.553407	Lower in SVN	234.045	428	negative
infant_vams_34	vam_2032856	infant_vams_34__vam_2032856	Infant VAMS Metabolome (3-4m)	3-4 months	met_vams_infant	-0.0135438	0.0135438	-0.117258	-0.375859	0.141343	0.372868	Lower in SVN	833.969	0.41	negative
infant_vams_34	vam_1015626	infant_vams_34__vam_1015626	Infant VAMS Metabolome (3-4m)	3-4 months	met_vams_infant	-0.0135099	0.0135099	-0.00645772	-0.265421	0.252506	0.960886	Lower in SVN	512.579	0.51	positive
milk_metabolome_34	rLC_pos_mtb_5958455	milk_metabolome_34__rLC_pos_mtb_5958455	Milk Metabolome	3-4 months	milk_metabolome	0.0134575	0.0134575	0.0804548	-0.178339	0.339248	0.541069	Higher in SVN	591.497	395	positive
milk_metabolome_34	rLC_neg_mtb_6450264	milk_metabolome_34__rLC_neg_mtb_6450264	Milk Metabolome	3-4 months	milk_metabolome	0.0134082	0.0134082	0.161219	-0.0970579	0.419495	0.220212	Higher in SVN	614.451	475	negative
maternal_gene_56	CE17_0	maternal_gene_56__CE17_0	Maternal Fecal Metagenome (Genes)	5-6 months	stool_gene_maternal	0.0134002	0.0134002	-0.00342138	-0.262386	0.255543	0.979271	Lower in SVN
milk_hmo_34	SUM_nmol/mL	milk_hmo_34__SUM_nmol/mL	Milk HMOs	3-4 months	hmos	-0.0133223	0.0133223	0.0703327	-0.188501	0.329166	0.593162	Higher in SVN
infant_gene_56	K01876	infant_gene_56__K01876	Infant Fecal Metagenome (Genes)	5-6 months	stool_gene_infant	-0.0133136	0.0133136	-0.218272	-0.475974	0.0394297	0.0965789	Lower in SVN
maternal_gene_56	K03700	maternal_gene_56__K03700	Maternal Fecal Metagenome (Genes)	5-6 months	stool_gene_maternal	-0.0131642	0.0131642	0.0629682	-0.195891	0.321828	0.632441	Higher in SVN
infant_gene_56	K02867	infant_gene_56__K02867	Infant Fecal Metagenome (Genes)	5-6 months	stool_gene_infant	-0.0131441	0.0131441	-0.249249	-0.506566	0.00806795	0.0575766	Lower in SVN
infant_gene_56	K00891	infant_gene_56__K00891	Infant Fecal Metagenome (Genes)	5-6 months	stool_gene_infant	-0.013113	0.013113	-0.194216	-0.452181	0.0637494	0.139467	Lower in SVN
maternal_taxa_56	Prevotella.sp000436035	maternal_taxa_56__Prevotella.sp000436035	Maternal Fecal Microbiome (Taxa)	5-6 months	stool_microbiome_maternal	-0.0130994	0.0130994	0.153212	-0.105132	0.411555	0.244048	Higher in SVN
milk_metabolome_34	rLC_neg_mtb_6850265	milk_metabolome_34__rLC_neg_mtb_6850265	Milk Metabolome	3-4 months	milk_metabolome	0.0130073	0.0130073	0.207083	-0.0507454	0.464911	0.115002	Higher in SVN	619.434	0.5	negative
milk_targeted_34	HArg	milk_targeted_34__HArg	Milk Targeted Metabolites	3-4 months	targeted_metabolites	0.0128181	0.0128181	0.00766324	-0.2513	0.266626	0.953592	Higher in SVN
milk_macro_micro_34	NR	milk_macro_micro_34__NR	Milk Macro- and Micronutrients	3-4 months	macro_micronutrients	0.0128163	0.0128163	0.0113332	-0.247628	0.270294	0.931413	Higher in SVN
maternal_vams_56	vam_2003529	maternal_vams_56__vam_2003529	Maternal VAMS Metabolome (5-6m)	5-6 months	met_vams_maternal	-0.0127704	0.0127704	0.103386	-0.155296	0.362067	0.432122	Higher in SVN	202.988	194	negative
infant_gene_56	K02939	infant_gene_56__K02939	Infant Fecal Metagenome (Genes)	5-6 months	stool_gene_infant	-0.0126922	0.0126922	-0.19732	-0.455254	0.0606127	0.133228	Lower in SVN
milk_taxa_34	Unclassified.Quadrisphaeraceae.sp1	milk_taxa_34__Unclassified.Quadrisphaeraceae.sp1	Milk Microbiome (Taxa)	3-4 months	milk_microbiome	0.0126144	0.0126144	-0.0746649	-0.333482	0.184152	0.570588	Lower in SVN
milk_metabolome_34	rLC_neg_mtb_7075080	milk_metabolome_34__rLC_neg_mtb_7075080	Milk Metabolome	3-4 months	milk_metabolome	-0.0126109	0.0126109	-0.168208	-0.426424	0.090007	0.200802	Lower in SVN	356.044	517	negative
milk_macro_micro_34	PROTEIN	milk_macro_micro_34__PROTEIN	Milk Macro- and Micronutrients	3-4 months	macro_micronutrients	0.0125738	0.0125738	-0.00105962	-0.260024	0.257905	0.993579	Lower in SVN
milk_metabolome_34	rLC_neg_mtb_4498656	milk_metabolome_34__rLC_neg_mtb_4498656	Milk Metabolome	3-4 months	milk_metabolome	-0.0125461	0.0125461	0.0542788	-0.204608	0.313165	0.680142	Higher in SVN	192.033	351	negative
milk_taxa_34	Halopseudomonas.formosensis	milk_taxa_34__Halopseudomonas.formosensis	Milk Microbiome (Taxa)	3-4 months	milk_microbiome	0.0125442	0.0125442	-0.129983	-0.3885	0.128535	0.323165	Lower in SVN
milk_taxa_34	Massilia.sp7	milk_taxa_34__Massilia.sp7	Milk Microbiome (Taxa)	3-4 months	milk_microbiome	0.0124593	0.0124593	-0.0751673	-0.333982	0.183648	0.567996	Lower in SVN
infant_gene_56	K00858	infant_gene_56__K00858	Infant Fecal Metagenome (Genes)	5-6 months	stool_gene_infant	-0.0124436	0.0124436	-0.17055	-0.428744	0.0876446	0.194587	Lower in SVN
milk_targeted_34	DG.16.0_16.1.	milk_targeted_34__DG.16.0_16.1.	Milk Targeted Metabolites	3-4 months	targeted_metabolites	0.0123957	0.0123957	0.184431	-0.0736328	0.442495	0.160599	Higher in SVN
infant_vams_34	vam_1017545	infant_vams_34__vam_1017545	Infant VAMS Metabolome (3-4m)	3-4 months	met_vams_infant	0.012374	0.012374	-0.218416	-0.476116	0.0392845	0.0963589	Lower in SVN	550.629	544	positive
infant_vams_34	vam_2024836	infant_vams_34__vam_2024836	Infant VAMS Metabolome (3-4m)	3-4 months	met_vams_infant	0.0123349	0.0123349	-0.184271	-0.442337	0.0737941	0.160963	Lower in SVN	680.476	406	negative
milk_taxa_34	Corynebacterium.sp111	milk_taxa_34__Corynebacterium.sp111	Milk Microbiome (Taxa)	3-4 months	milk_microbiome	0.0123347	0.0123347	-0.0755631	-0.334377	0.18325	0.565959	Lower in SVN
maternal_vams_56	vam_1022865	maternal_vams_56__vam_1022865	Maternal VAMS Metabolome (5-6m)	5-6 months	met_vams_maternal	-0.0123171	0.0123171	0.0649478	-0.193905	0.323801	0.621775	Higher in SVN	666.459	483	positive
maternal_taxa_56	Unknown_RUG410.1	maternal_taxa_56__Unknown_RUG410.1	Maternal Fecal Microbiome (Taxa)	5-6 months	stool_microbiome_maternal	-0.0123029	0.0123029	-0.030922	-0.289861	0.228017	0.814332	Lower in SVN
milk_metabolome_34	rLC_neg_mtb_6362248	milk_metabolome_34__rLC_neg_mtb_6362248	Milk Metabolome	3-4 months	milk_metabolome	0.0122539	0.0122539	0.120911	-0.137667	0.379488	0.358141	Higher in SVN	742.456	469	negative
milk_taxa_34	Prevotella.copri.2	milk_taxa_34__Prevotella.copri.2	Milk Microbiome (Taxa)	3-4 months	milk_microbiome	0.0122453	0.0122453	-0.163958	-0.422211	0.0942952	0.212452	Lower in SVN
milk_metabolome_34	rLC_neg_mtb_5356559	milk_metabolome_34__rLC_neg_mtb_5356559	Milk Metabolome	3-4 months	milk_metabolome	0.0122452	0.0122452	0.0944309	-0.164298	0.35316	0.473091	Higher in SVN	662.474	397	negative
infant_gene_56	K01869	infant_gene_56__K01869	Infant Fecal Metagenome (Genes)	5-6 months	stool_gene_infant	-0.0121185	0.0121185	-0.188302	-0.446327	0.0697239	0.151969	Lower in SVN
milk_taxa_34	Corynebacterium.sp75	milk_taxa_34__Corynebacterium.sp75	Milk Microbiome (Taxa)	3-4 months	milk_microbiome	0.0121126	0.0121126	0.196747	-0.0611923	0.454686	0.134364	Higher in SVN
milk_taxa_34	Unclassified.Dermatophilaceae_390796.sp33	milk_taxa_34__Unclassified.Dermatophilaceae_390796.sp33	Milk Microbiome (Taxa)	3-4 months	milk_microbiome	0.0120609	0.0120609	-0.0268896	-0.285835	0.232056	0.838186	Lower in SVN
milk_taxa_34	Corynebacterium.sp36	milk_taxa_34__Corynebacterium.sp36	Milk Microbiome (Taxa)	3-4 months	milk_microbiome	0.0119959	0.0119959	0.00161965	-0.257345	0.260584	0.990186	Higher in SVN
milk_taxa_34	Staphylococcus.sp42	milk_taxa_34__Staphylococcus.sp42	Milk Microbiome (Taxa)	3-4 months	milk_microbiome	0.0119759	0.0119759	-0.0766666	-0.335476	0.182142	0.560296	Lower in SVN
milk_metabolome_34	rLC_neg_mtb_6333558	milk_metabolome_34__rLC_neg_mtb_6333558	Milk Metabolome	3-4 months	milk_metabolome	0.0119533	0.0119533	0.0192697	-0.239685	0.278224	0.883651	Higher in SVN	698.449	469	negative
maternal_gene_56	K11621	maternal_gene_56__K11621	Maternal Fecal Metagenome (Genes)	5-6 months	stool_gene_maternal	0.0118564	0.0118564	-0.0824626	-0.341247	0.176322	0.531013	Lower in SVN
maternal_vams_56	vam_2001501	maternal_vams_56__vam_2001501	Maternal VAMS Metabolome (5-6m)	5-6 months	met_vams_maternal	0.0118375	0.0118375	0.0795477	-0.179249	0.338345	0.545643	Higher in SVN	148.864	133	negative
infant_gene_56	K04077	infant_gene_56__K04077	Infant Fecal Metagenome (Genes)	5-6 months	stool_gene_infant	-0.0118221	0.0118221	-0.175808	-0.433954	0.0823379	0.181142	Lower in SVN
maternal_vams_56	vam_1010562	maternal_vams_56__vam_1010562	Maternal VAMS Metabolome (5-6m)	5-6 months	met_vams_maternal	0.01177	0.01177	0.0206378	-0.238315	0.279591	0.875456	Higher in SVN	403.925	463	positive
milk_bioactive_34	LH	milk_bioactive_34__LH	Milk Bioactive Proteins	3-4 months	bioactive_proteins	0.0116739	0.0116739	0.146706	-0.111689	0.405101	0.2647	Higher in SVN
milk_metabolome_34	rLC_pos_mtb_6303596	milk_metabolome_34__rLC_pos_mtb_6303596	Milk Metabolome	3-4 months	milk_metabolome	0.0115383	0.0115383	-0.061303	-0.320168	0.197562	0.641473	Lower in SVN	603.536	413	positive
infant_vams_34	vam_1038464	infant_vams_34__vam_1038464	Infant VAMS Metabolome (3-4m)	3-4 months	met_vams_infant	0.0115323	0.0115323	0.0610656	-0.1978	0.319931	0.642765	Higher in SVN	941.271	744	positive
milk_targeted_34	DG.16.0_20.3.	milk_targeted_34__DG.16.0_20.3.	Milk Targeted Metabolites	3-4 months	targeted_metabolites	0.0115259	0.0115259	0.135843	-0.122633	0.394319	0.30179	Higher in SVN
maternal_prot_nav_56	Q96JM3	maternal_prot_nav_56__Q96JM3	Maternal Plasma Proteome (Naive)	5-6 months	prot_nav	-0.0114877	0.0114877	-0.166107	-0.424341	0.0921267	0.206501	Lower in SVN
maternal_taxa_56	Gemmiger.sp900539695	maternal_taxa_56__Gemmiger.sp900539695	Maternal Fecal Microbiome (Taxa)	5-6 months	stool_microbiome_maternal	0.0114505	0.0114505	-0.0437851	-0.302699	0.215129	0.739476	Lower in SVN
maternal_taxa_56	Unknown_Acutalibacteraceae.11	maternal_taxa_56__Unknown_Acutalibacteraceae.11	Maternal Fecal Microbiome (Taxa)	5-6 months	stool_microbiome_maternal	-0.0112571	0.0112571	0.0246901	-0.234258	0.283638	0.851262	Higher in SVN
maternal_prot_dep_56	Q6UXB8	maternal_prot_dep_56__Q6UXB8	Maternal Plasma Proteome (Depleted)	5-6 months	prot_dep	-0.0112362	0.0112362	0.033905	-0.225029	0.292839	0.796794	Higher in SVN
maternal_prot_nav_56	P42680	maternal_prot_nav_56__P42680	Maternal Plasma Proteome (Naive)	5-6 months	prot_nav	-0.0111654	0.0111654	0.0544743	-0.204412	0.31336	0.679054	Higher in SVN
maternal_gene_56	K05770	maternal_gene_56__K05770	Maternal Fecal Metagenome (Genes)	5-6 months	stool_gene_maternal	-0.0111316	0.0111316	0.0310973	-0.227842	0.290036	0.813298	Higher in SVN
infant_gene_56	K03602	infant_gene_56__K03602	Infant Fecal Metagenome (Genes)	5-6 months	stool_gene_infant	-0.0111013	0.0111013	-0.191434	-0.449427	0.0665604	0.145247	Lower in SVN
milk_metabolome_34	rLC_neg_mtb_6823454	milk_metabolome_34__rLC_neg_mtb_6823454	Milk Metabolome	3-4 months	milk_metabolome	0.0111	0.0111	0.122333	-0.136235	0.380902	0.352505	Higher in SVN	752.496	502	negative
infant_gene_56	K03544	infant_gene_56__K03544	Infant Fecal Metagenome (Genes)	5-6 months	stool_gene_infant	-0.0110405	0.0110405	-0.221173	-0.478841	0.0364953	0.0922083	Lower in SVN
milk_targeted_34	EPA	milk_targeted_34__EPA	Milk Targeted Metabolites	3-4 months	targeted_metabolites	0.0110289	0.0110289	0.0242866	-0.234662	0.283235	0.853665	Higher in SVN
maternal_prot_dep_56	P24557	maternal_prot_dep_56__P24557	Maternal Plasma Proteome (Depleted)	5-6 months	prot_dep	-0.0110259	0.0110259	-0.231476	-0.48902	0.0260686	0.0779471	Lower in SVN
milk_metabolome_34	rLC_neg_mtb_6704225	milk_metabolome_34__rLC_neg_mtb_6704225	Milk Metabolome	3-4 months	milk_metabolome	0.0109697	0.0109697	0.119928	-0.138656	0.378512	0.362068	Higher in SVN	756.473	496	negative
maternal_prot_nav_56	P0CG04	maternal_prot_nav_56__P0CG04	Maternal Plasma Proteome (Naive)	5-6 months	prot_nav	0.0109236	0.0109236	0.0922727	-0.166467	0.351012	0.483273	Higher in SVN
milk_targeted_34	DG.18.1_18.1.	milk_targeted_34__DG.18.1_18.1.	Milk Targeted Metabolites	3-4 months	targeted_metabolites	-0.0108253	0.0108253	-0.0807968	-0.339589	0.177995	0.53935	Lower in SVN
maternal_taxa_56	Unknown_UMGS1826	maternal_taxa_56__Unknown_UMGS1826	Maternal Fecal Microbiome (Taxa)	5-6 months	stool_microbiome_maternal	0.0107851	0.0107851	-0.250069	-0.507376	0.00723669	0.0567544	Lower in SVN
maternal_vams_56	vam_2008237	maternal_vams_56__vam_2008237	Maternal VAMS Metabolome (5-6m)	5-6 months	met_vams_maternal	0.0107192	0.0107192	0.0200812	-0.238873	0.279035	0.878788	Higher in SVN	320.234	408	negative	E1576	CE2537
maternal_prot_nav_56	Q9H267	maternal_prot_nav_56__Q9H267	Maternal Plasma Proteome (Naive)	5-6 months	prot_nav	-0.0106267	0.0106267	-0.021441	-0.280393	0.237511	0.870651	Lower in SVN
infant_gene_56	K03043	infant_gene_56__K03043	Infant Fecal Metagenome (Genes)	5-6 months	stool_gene_infant	-0.0105848	0.0105848	-0.183623	-0.441695	0.0744483	0.162446	Lower in SVN
maternal_vams_56	vam_1000073	maternal_vams_56__vam_1000073	Maternal VAMS Metabolome (5-6m)	5-6 months	met_vams_maternal	-0.0105597	0.0105597	-0.0798623	-0.338658	0.178933	0.544055	Lower in SVN	88.076	827	positive	E1795;E2083	C01165;C01157;C00430;C03440;C01110;C00555	L-Glutamate 5-semialdehyde; L-Glutamate gamma-semialdehyde$trans-4-Hydroxy-L-proline$5-Aminolevulinate; 5-Amino-4-oxopentanoate; 5-Amino-4-oxovaleric acid$cis-4-Hydroxy-D-proline$5-Amino-2-oxopentanoic acid; 5-Amino-2-oxopentanoate; 2-Oxo-5-amino-pentanoate; 2-Oxo-5-aminopentanoate; alpha-Keto-delta-aminopentanoate; 2-Oxo-5-aminovalerate;4-Aminobutanal; 4-Aminobutyraldehyde; Butyraldehyde, 4-amin…
infant_vams_34	vam_1014490	infant_vams_34__vam_1014490	Infant VAMS Metabolome (3-4m)	3-4 months	met_vams_infant	0.0105399	0.0105399	-0.168423	-0.426637	0.0897903	0.200226	Lower in SVN	491.174	0.34	positive
infant_vams_34	vam_1038192	infant_vams_34__vam_1038192	Infant VAMS Metabolome (3-4m)	3-4 months	met_vams_infant	0.0105384	0.0105384	0.0278313	-0.231113	0.286775	0.832601	Higher in SVN	935.64	392	positive
maternal_taxa_56	Ruminococcus_F.champanellensis	maternal_taxa_56__Ruminococcus_F.champanellensis	Maternal Fecal Microbiome (Taxa)	5-6 months	stool_microbiome_maternal	0.0104724	0.0104724	-0.252229	-0.509507	0.00504791	0.0546358	Lower in SVN
infant_gene_56	K03687	infant_gene_56__K03687	Infant Fecal Metagenome (Genes)	5-6 months	stool_gene_infant	-0.0104262	0.0104262	-0.202988	-0.460861	0.0548848	0.122394	Lower in SVN
maternal_prot_nav_56	A0A087WSY6	maternal_prot_nav_56__A0A087WSY6	Maternal Plasma Proteome (Naive)	5-6 months	prot_nav	-0.0103795	0.0103795	0.0668889	-0.191957	0.325735	0.611392	Higher in SVN
maternal_gene_56	GH92_0	maternal_gene_56__GH92_0	Maternal Fecal Metagenome (Genes)	5-6 months	stool_gene_maternal	0.0103413	0.0103413	0.104557	-0.154118	0.363232	0.426917	Higher in SVN
maternal_gene_56	K07133	maternal_gene_56__K07133	Maternal Fecal Metagenome (Genes)	5-6 months	stool_gene_maternal	-0.0103021	0.0103021	0.132985	-0.125511	0.391482	0.312095	Higher in SVN
maternal_vams_56	vam_1022937	maternal_vams_56__vam_1022937	Maternal VAMS Metabolome (5-6m)	5-6 months	met_vams_maternal	0.0102565	0.0102565	0.0656985	-0.193152	0.324549	0.61775	Higher in SVN	667.762	513	positive
maternal_gene_56	K03744	maternal_gene_56__K03744	Maternal Fecal Metagenome (Genes)	5-6 months	stool_gene_maternal	-0.0102068	0.0102068	0.0927214	-0.166016	0.351459	0.481146	Higher in SVN
milk_hmo_34	Sia_nmol/mL	milk_hmo_34__Sia_nmol/mL	Milk HMOs	3-4 months	hmos	0.0101631	0.0101631	0.0139771	-0.244982	0.272936	0.915466	Higher in SVN
maternal_prot_nav_56	P02679	maternal_prot_nav_56__P02679	Maternal Plasma Proteome (Naive)	5-6 months	prot_nav	0.0101496	0.0101496	0.133486	-0.125007	0.391979	0.310271	Higher in SVN
maternal_taxa_56	SFFS01.sp004557805	maternal_taxa_56__SFFS01.sp004557805	Maternal Fecal Microbiome (Taxa)	5-6 months	stool_microbiome_maternal	0.0101174	0.0101174	0.0745763	-0.184241	0.333394	0.571045	Higher in SVN
maternal_gene_56	K03930	maternal_gene_56__K03930	Maternal Fecal Metagenome (Genes)	5-6 months	stool_gene_maternal	0.0100919	0.0100919	-0.0607898	-0.319657	0.198077	0.644267	Lower in SVN
milk_hmo_34	6'SL_nmol/mL	milk_hmo_34__6'SL_nmol/mL	Milk HMOs	3-4 months	hmos	0.0100158	0.0100158	-0.117767	-0.376364	0.140831	0.370794	Lower in SVN
milk_hmo_34	LNFP III_nmol/mL	milk_hmo_34__LNFP III_nmol/mL	Milk HMOs	3-4 months	hmos	0.00999446	0.00999446	-0.0113934	-0.270354	0.247568	0.931049	Lower in SVN
maternal_vams_56	vam_1022084	maternal_vams_56__vam_1022084	Maternal VAMS Metabolome (5-6m)	5-6 months	met_vams_maternal	0.00998976	0.00998976	0.0565646	-0.202315	0.315444	0.66746	Higher in SVN	653.659	521	positive
maternal_gene_56	CBM35_0	maternal_gene_56__CBM35_0	Maternal Fecal Metagenome (Genes)	5-6 months	stool_gene_maternal	0.00998444	0.00998444	-0.0366492	-0.295578	0.22228	0.780749	Lower in SVN
maternal_taxa_56	Unknown_Bulleidia.2	maternal_taxa_56__Unknown_Bulleidia.2	Maternal Fecal Microbiome (Taxa)	5-6 months	stool_microbiome_maternal	-0.0099816	0.0099816	-0.0118949	-0.270856	0.247066	0.928022	Lower in SVN
maternal_taxa_56	Unknown_CAG.273.6	maternal_taxa_56__Unknown_CAG.273.6	Maternal Fecal Microbiome (Taxa)	5-6 months	stool_microbiome_maternal	-0.0099607	0.0099607	-0.0194953	-0.27845	0.239459	0.882299	Lower in SVN
milk_metabolome_34	rLC_neg_mtb_1386217	milk_metabolome_34__rLC_neg_mtb_1386217	Milk Metabolome	3-4 months	milk_metabolome	-0.00995628	0.00995628	-0.0329907	-0.291926	0.225945	0.802159	Lower in SVN	172.992	103	negative	E4425	C00850	Aryl sulfate
milk_taxa_34	Nocardiopsis_A_393323.salina	milk_taxa_34__Nocardiopsis_A_393323.salina	Milk Microbiome (Taxa)	3-4 months	milk_microbiome	-0.00992683	0.00992683	0.100892	-0.157804	0.359587	0.443322	Higher in SVN
maternal_taxa_56	Unknown_UMGS1502	maternal_taxa_56__Unknown_UMGS1502	Maternal Fecal Microbiome (Taxa)	5-6 months	stool_microbiome_maternal	-0.0098561	0.0098561	0.300239	0.0436683	0.556809	0.0219813	Higher in SVN
infant_gene_56	K04096	infant_gene_56__K04096	Infant Fecal Metagenome (Genes)	5-6 months	stool_gene_infant	-0.00984406	0.00984406	-0.177822	-0.435949	0.0803051	0.176179	Lower in SVN
milk_targeted_34	DG.16.0_18.1.	milk_targeted_34__DG.16.0_18.1.	Milk Targeted Metabolites	3-4 months	targeted_metabolites	-0.00984291	0.00984291	0.0518281	-0.207065	0.310722	0.693839	Higher in SVN
infant_vams_34	vam_1024747	infant_vams_34__vam_1024747	Infant VAMS Metabolome (3-4m)	3-4 months	met_vams_infant	0.00974274	0.00974274	-0.014895	-0.273854	0.244064	0.909937	Lower in SVN	693.946	0.64	positive
milk_macro_micro_34	Mn	milk_macro_micro_34__Mn	Milk Macro- and Micronutrients	3-4 months	macro_micronutrients	0.00971017	0.00971017	0.176051	-0.0820931	0.434195	0.180539	Higher in SVN
infant_vams_34	vam_2001206	infant_vams_34__vam_2001206	Infant VAMS Metabolome (3-4m)	3-4 months	met_vams_infant	0.00969757	0.00969757	-0.0407547	-0.299675	0.218166	0.75692	Lower in SVN	141.017	363	negative
infant_gene_56	K11991	infant_gene_56__K11991	Infant Fecal Metagenome (Genes)	5-6 months	stool_gene_infant	-0.00967771	0.00967771	-0.170208	-0.428406	0.0879893	0.195485	Lower in SVN
maternal_taxa_56	UMGS1338.sp900550805	maternal_taxa_56__UMGS1338.sp900550805	Maternal Fecal Microbiome (Taxa)	5-6 months	stool_microbiome_maternal	0.00958595	0.00958595	-0.0759344	-0.334746	0.182878	0.56405	Lower in SVN
maternal_vams_56	vam_1034940	maternal_vams_56__vam_1034940	Maternal VAMS Metabolome (5-6m)	5-6 months	met_vams_maternal	-0.00958151	0.00958151	0.170305	-0.0878913	0.428502	0.195229	Higher in SVN	872.558	538	positive
milk_metabolome_34	rLC_pos_mtb_5685893	milk_metabolome_34__rLC_pos_mtb_5685893	Milk Metabolome	3-4 months	milk_metabolome	0.00957173	0.00957173	0.130265	-0.12825	0.388781	0.322111	Higher in SVN	619.531	0.38	positive
milk_metabolome_34	rLC_neg_mtb_2843457	milk_metabolome_34__rLC_neg_mtb_2843457	Milk Metabolome	3-4 months	milk_metabolome	0.00954505	0.00954505	0.168332	-0.0898823	0.426546	0.20047	Higher in SVN	125.024	223	negative
infant_gene_56	K03553	infant_gene_56__K03553	Infant Fecal Metagenome (Genes)	5-6 months	stool_gene_infant	-0.00951318	0.00951318	-0.230033	-0.487595	0.0275288	0.079829	Lower in SVN
maternal_prot_dep_56	Q9NZQ3	maternal_prot_dep_56__Q9NZQ3	Maternal Plasma Proteome (Depleted)	5-6 months	prot_dep	0.00945093	0.00945093	0.0504142	-0.208483	0.309311	0.701788	Higher in SVN
maternal_taxa_56	Unknown_Acetatifactor.9	maternal_taxa_56__Unknown_Acetatifactor.9	Maternal Fecal Microbiome (Taxa)	5-6 months	stool_microbiome_maternal	0.00943738	0.00943738	0.174084	-0.0840778	0.432246	0.185472	Higher in SVN
infant_gene_56	K00927	infant_gene_56__K00927	Infant Fecal Metagenome (Genes)	5-6 months	stool_gene_infant	-0.00943201	0.00943201	-0.186907	-0.444946	0.0711328	0.155038	Lower in SVN
infant_gene_56	K02335	infant_gene_56__K02335	Infant Fecal Metagenome (Genes)	5-6 months	stool_gene_infant	-0.00941066	0.00941066	-0.185918	-0.443968	0.0721307	0.15724	Lower in SVN
maternal_gene_56	K01192	maternal_gene_56__K01192	Maternal Fecal Metagenome (Genes)	5-6 months	stool_gene_maternal	0.00939065	0.00939065	-0.0581845	-0.317059	0.20069	0.658529	Lower in SVN
maternal_gene_56	K06412	maternal_gene_56__K06412	Maternal Fecal Metagenome (Genes)	5-6 months	stool_gene_maternal	-0.00933355	0.00933355	0.0330423	-0.225893	0.291978	0.801856	Higher in SVN
milk_macro_micro_34	CARBOHYDRATE	milk_macro_micro_34__CARBOHYDRATE	Milk Macro- and Micronutrients	3-4 months	macro_micronutrients	0.00928773	0.00928773	-0.222268	-0.479923	0.0353871	0.0905997	Lower in SVN
infant_vams_34	vam_2034328	infant_vams_34__vam_2034328	Infant VAMS Metabolome (3-4m)	3-4 months	met_vams_infant	0.00922826	0.00922826	0.0473814	-0.211524	0.306287	0.718946	Higher in SVN	853.399	406	negative
milk_macro_micro_34	Na	milk_macro_micro_34__Na	Milk Macro- and Micronutrients	3-4 months	macro_micronutrients	-0.00921781	0.00921781	-0.0599592	-0.318829	0.19891	0.6488	Lower in SVN
maternal_taxa_56	CAG.269.sp900556865	maternal_taxa_56__CAG.269.sp900556865	Maternal Fecal Microbiome (Taxa)	5-6 months	stool_microbiome_maternal	-0.00920621	0.00920621	0.234568	-0.0229381	0.492074	0.0740339	Higher in SVN
maternal_taxa_56	Parabacteroides.distasonis	maternal_taxa_56__Parabacteroides.distasonis	Maternal Fecal Microbiome (Taxa)	5-6 months	stool_microbiome_maternal	0.00919978	0.00919978	-0.192883	-0.450862	0.0650965	0.142214	Lower in SVN
maternal_vams_56	vam_2015910	maternal_vams_56__vam_2015910	Maternal VAMS Metabolome (5-6m)	5-6 months	met_vams_maternal	0.0091991	0.0091991	-0.125899	-0.384444	0.132646	0.338624	Lower in SVN	500.978	181	negative
maternal_taxa_56	Faecalibacterium.prausnitzii_A	maternal_taxa_56__Faecalibacterium.prausnitzii_A	Maternal Fecal Microbiome (Taxa)	5-6 months	stool_microbiome_maternal	-0.00916566	0.00916566	0.0659271	-0.192922	0.324777	0.616527	Higher in SVN
infant_vams_34	vam_1032614	infant_vams_34__vam_1032614	Infant VAMS Metabolome (3-4m)	3-4 months	met_vams_infant	0.00916494	0.00916494	-0.082793	-0.341576	0.17599	0.529367	Lower in SVN	835.668	504	positive
milk_metabolome_34	rLC_neg_mtb_6023423	milk_metabolome_34__rLC_neg_mtb_6023423	Milk Metabolome	3-4 months	milk_metabolome	0.00916455	0.00916455	0.0200153	-0.238939	0.278969	0.879183	Higher in SVN	658.403	446	negative
infant_gene_56	K00800	infant_gene_56__K00800	Infant Fecal Metagenome (Genes)	5-6 months	stool_gene_infant	-0.00912309	0.00912309	-0.211872	-0.469648	0.0459027	0.106805	Lower in SVN
milk_metabolome_34	rLC_pos_mtb_417136	milk_metabolome_34__rLC_pos_mtb_417136	Milk Metabolome	3-4 months	milk_metabolome	-0.00911058	0.00911058	0.0118382	-0.247123	0.270799	0.928364	Higher in SVN	849.276	45	positive
milk_hmo_34	FDSLNH_nmol/mL	milk_hmo_34__FDSLNH_nmol/mL	Milk HMOs	3-4 months	hmos	0.00910221	0.00910221	-0.101374	-0.360067	0.157319	0.441143	Lower in SVN
milk_metabolome_34	rLC_neg_mtb_6790575	milk_metabolome_34__rLC_neg_mtb_6790575	Milk Metabolome	3-4 months	milk_metabolome	0.00908485	0.00908485	0.0666549	-0.192192	0.325502	0.612639	Higher in SVN	616.467	496	negative
maternal_vams_56	vam_2003717	maternal_vams_56__vam_2003717	Maternal VAMS Metabolome (5-6m)	5-6 months	met_vams_maternal	0.00907416	0.00907416	0.081981	-0.176806	0.340768	0.533417	Higher in SVN	209.083	388	negative	E326	C02325	Sinapyl alcohol; Sinapoyl alcohol
maternal_gene_56	K18354	maternal_gene_56__K18354	Maternal Fecal Metagenome (Genes)	5-6 months	stool_gene_maternal	-0.00905186	0.00905186	-0.011855	-0.270816	0.247106	0.928263	Lower in SVN
maternal_vams_56	vam_1033445	maternal_vams_56__vam_1033445	Maternal VAMS Metabolome (5-6m)	5-6 months	met_vams_maternal	0.0089754	0.0089754	-0.152183	-0.410535	0.106168	0.247236	Lower in SVN	846.539	631	positive
infant_gene_56	K03470	infant_gene_56__K03470	Infant Fecal Metagenome (Genes)	5-6 months	stool_gene_infant	-0.00895613	0.00895613	-0.232015	-0.489552	0.0255227	0.0772529	Lower in SVN
maternal_taxa_56	Unknown_CAG.884.2	maternal_taxa_56__Unknown_CAG.884.2	Maternal Fecal Microbiome (Taxa)	5-6 months	stool_microbiome_maternal	-0.00894254	0.00894254	0.125635	-0.132912	0.384182	0.339641	Higher in SVN
maternal_vams_56	vam_1005022	maternal_vams_56__vam_1005022	Maternal VAMS Metabolome (5-6m)	5-6 months	met_vams_maternal	-0.00892758	0.00892758	-0.141478	-0.399912	0.116957	0.282143	Lower in SVN	272.186	0.34	positive
milk_metabolome_34	rLC_pos_mtb_6267182	milk_metabolome_34__rLC_pos_mtb_6267182	Milk Metabolome	3-4 months	milk_metabolome	-0.00892266	0.00892266	0.0894509	-0.169302	0.348204	0.496763	Higher in SVN	643.528	0.42	positive
maternal_prot_dep_56	Q8NHQ9	maternal_prot_dep_56__Q8NHQ9	Maternal Plasma Proteome (Depleted)	5-6 months	prot_dep	-0.00883017	0.00883017	-0.274552	-0.531516	-0.017588	0.0363391	Lower in SVN
infant_vams_34	vam_1035143	infant_vams_34__vam_1035143	Infant VAMS Metabolome (3-4m)	3-4 months	met_vams_infant	0.00882729	0.00882729	0.0333802	-0.225555	0.292315	0.799872	Higher in SVN	878.209	579	positive
maternal_prot_dep_56	Q99487	maternal_prot_dep_56__Q99487	Maternal Plasma Proteome (Depleted)	5-6 months	prot_dep	-0.0088009	0.0088009	-0.252969	-0.510236	0.00429833	0.0539256	Lower in SVN
maternal_vams_56	vam_1043444	maternal_vams_56__vam_1043444	Maternal VAMS Metabolome (5-6m)	5-6 months	met_vams_maternal	0.00879472	0.00879472	-0.0216135	-0.280566	0.237339	0.869619	Lower in SVN	1300.81	658	positive
infant_gene_56	K04066	infant_gene_56__K04066	Infant Fecal Metagenome (Genes)	5-6 months	stool_gene_infant	-0.00878992	0.00878992	-0.213551	-0.471307	0.0442056	0.104045	Lower in SVN
maternal_taxa_56	Anaerovibrio.sp900548165	maternal_taxa_56__Anaerovibrio.sp900548165	Maternal Fecal Microbiome (Taxa)	5-6 months	stool_microbiome_maternal	-0.00878948	0.00878948	0.0413469	-0.217572	0.300266	0.753501	Higher in SVN
maternal_taxa_56	Unknown_CAG.127.2	maternal_taxa_56__Unknown_CAG.127.2	Maternal Fecal Microbiome (Taxa)	5-6 months	stool_microbiome_maternal	-0.00875138	0.00875138	0.0677388	-0.191104	0.326582	0.60687	Higher in SVN
maternal_taxa_56	CAG.115.sp000432175	maternal_taxa_56__CAG.115.sp000432175	Maternal Fecal Microbiome (Taxa)	5-6 months	stool_microbiome_maternal	-0.00868263	0.00868263	0.0525793	-0.206312	0.311471	0.68963	Higher in SVN
maternal_prot_nav_56	O95267	maternal_prot_nav_56__O95267	Maternal Plasma Proteome (Naive)	5-6 months	prot_nav	-0.00854585	0.00854585	-0.0599889	-0.318858	0.19888	0.648638	Lower in SVN
milk_targeted_34	Cys	milk_targeted_34__Cys	Milk Targeted Metabolites	3-4 months	targeted_metabolites	0.00851816	0.00851816	0.114892	-0.143723	0.373507	0.382604	Higher in SVN
infant_gene_56	K02876	infant_gene_56__K02876	Infant Fecal Metagenome (Genes)	5-6 months	stool_gene_infant	-0.0084809	0.0084809	-0.189039	-0.447058	0.0689786	0.150365	Lower in SVN
infant_gene_56	K02888	infant_gene_56__K02888	Infant Fecal Metagenome (Genes)	5-6 months	stool_gene_infant	-0.0084374	0.0084374	-0.203971	-0.461833	0.0538917	0.120588	Lower in SVN
milk_bioactive_34	FGF-21	milk_bioactive_34__FGF-21	Milk Bioactive Proteins	3-4 months	bioactive_proteins	-0.00840533	0.00840533	0.0998608	-0.15884	0.358561	0.447999	Higher in SVN
infant_vams_34	vam_1030575	infant_vams_34__vam_1030575	Infant VAMS Metabolome (3-4m)	3-4 months	met_vams_infant	-0.00838483	0.00838483	0.0568467	-0.202032	0.315726	0.665901	Higher in SVN	799.747	533	positive
milk_metabolome_34	rLC_neg_mtb_6387186	milk_metabolome_34__rLC_neg_mtb_6387186	Milk Metabolome	3-4 months	milk_metabolome	0.00837247	0.00837247	0.0186035	-0.240352	0.277559	0.887647	Higher in SVN	564.391	469	negative
maternal_gene_56	K08974	maternal_gene_56__K08974	Maternal Fecal Metagenome (Genes)	5-6 months	stool_gene_maternal	-0.00834129	0.00834129	-0.0225601	-0.281511	0.236391	0.863963	Lower in SVN
infant_vams_34	vam_2034792	infant_vams_34__vam_2034792	Infant VAMS Metabolome (3-4m)	3-4 months	met_vams_infant	0.00826959	0.00826959	-0.00582551	-0.264789	0.253138	0.964713	Lower in SVN	864.576	642	negative
infant_vams_34	vam_2023221	infant_vams_34__vam_2023221	Infant VAMS Metabolome (3-4m)	3-4 months	met_vams_infant	0.00826919	0.00826919	0.0511951	-0.2077	0.31009	0.697394	Higher in SVN	653.445	402	negative
milk_targeted_34	FA.20.3.	milk_targeted_34__FA.20.3.	Milk Targeted Metabolites	3-4 months	targeted_metabolites	0.00825362	0.00825362	0.0848035	-0.173971	0.343578	0.519409	Higher in SVN
maternal_taxa_56	Unknown_CAG.492.2	maternal_taxa_56__Unknown_CAG.492.2	Maternal Fecal Microbiome (Taxa)	5-6 months	stool_microbiome_maternal	0.00821765	0.00821765	0.0320423	-0.226895	0.29098	0.807734	Higher in SVN
milk_hmo_34	LSTb_nmol/mL	milk_hmo_34__LSTb_nmol/mL	Milk HMOs	3-4 months	hmos	-0.00819391	0.00819391	0.123096	-0.135467	0.38166	0.349505	Higher in SVN
milk_metabolome_34	rLC_neg_mtb_2797207	milk_metabolome_34__rLC_neg_mtb_2797207	Milk Metabolome	3-4 months	milk_metabolome	-0.00818774	0.00818774	-0.17841	-0.436532	0.0797114	0.174748	Lower in SVN	451.925	211	negative
maternal_taxa_56	Unknown_CAG.582.1	maternal_taxa_56__Unknown_CAG.582.1	Maternal Fecal Microbiome (Taxa)	5-6 months	stool_microbiome_maternal	0.00815344	0.00815344	0.0352783	-0.223653	0.29421	0.788753	Higher in SVN
milk_metabolome_34	rLC_neg_mtb_6361427	milk_metabolome_34__rLC_neg_mtb_6361427	Milk Metabolome	3-4 months	milk_metabolome	0.00813592	0.00813592	-0.0160101	-0.274968	0.242948	0.903227	Lower in SVN	686.436	469	negative
infant_vams_34	vam_1027556	infant_vams_34__vam_1027556	Infant VAMS Metabolome (3-4m)	3-4 months	met_vams_infant	-0.00810268	0.00810268	-0.0399216	-0.298844	0.219001	0.761737	Lower in SVN	739.969	448	positive
infant_gene_56	K02111	infant_gene_56__K02111	Infant Fecal Metagenome (Genes)	5-6 months	stool_gene_infant	-0.00809812	0.00809812	-0.180688	-0.438788	0.0774119	0.16929	Lower in SVN
maternal_taxa_56	UMGS1781.sp900554635	maternal_taxa_56__UMGS1781.sp900554635	Maternal Fecal Microbiome (Taxa)	5-6 months	stool_microbiome_maternal	0.00809704	0.00809704	-0.0886756	-0.347432	0.170081	0.500505	Lower in SVN
maternal_taxa_56	Unknown_Prevotella.13	maternal_taxa_56__Unknown_Prevotella.13	Maternal Fecal Microbiome (Taxa)	5-6 months	stool_microbiome_maternal	-0.00804237	0.00804237	0.171328	-0.0868591	0.429516	0.192552	Higher in SVN
infant_vams_34	vam_1001203	infant_vams_34__vam_1001203	Infant VAMS Metabolome (3-4m)	3-4 months	met_vams_infant	0.00794875	0.00794875	-0.0213321	-0.280285	0.23762	0.871302	Lower in SVN	153.127	365	positive	E418;E465;E693	C00712;C00219;C02452;C11409;C02759;C00964	(9Z)-Octadecenoic acid; (Z)-Octadec-9-enoic acid; Oleate; Oleic acid;arachidonic acid;Perillyl alcohol; (-)-Perillyl alcohol; p-Mentha-1,8-dien-7-ol; (-)-Perillylalcohol$(+)-trans-Carveol; (4S,6R)-trans-Carveol$$(-)-trans-Carveol
infant_gene_56	K03629	infant_gene_56__K03629	Infant Fecal Metagenome (Genes)	5-6 months	stool_gene_infant	-0.00791467	0.00791467	-0.196942	-0.45488	0.0609947	0.133976	Lower in SVN
infant_gene_56	K03439	infant_gene_56__K03439	Infant Fecal Metagenome (Genes)	5-6 months	stool_gene_infant	-0.00787184	0.00787184	-0.208074	-0.465892	0.0497431	0.113266	Lower in SVN
milk_taxa_34	Anaerostipes.hadrus	milk_taxa_34__Anaerostipes.hadrus	Milk Microbiome (Taxa)	3-4 months	milk_microbiome	-0.0078681	0.0078681	-0.0370811	-0.296009	0.221847	0.778232	Lower in SVN
infant_vams_34	vam_1025205	infant_vams_34__vam_1025205	Infant VAMS Metabolome (3-4m)	3-4 months	met_vams_infant	0.00784609	0.00784609	-0.193935	-0.451903	0.0640333	0.140042	Lower in SVN	699.398	346	positive
maternal_taxa_56	Prevotella.sp900548745	maternal_taxa_56__Prevotella.sp900548745	Maternal Fecal Microbiome (Taxa)	5-6 months	stool_microbiome_maternal	-0.00782764	0.00782764	0.205452	-0.0523945	0.463298	0.117904	Higher in SVN
milk_taxa_34	Unclassified.Dermatophilaceae_390796.sp8	milk_taxa_34__Unclassified.Dermatophilaceae_390796.sp8	Milk Microbiome (Taxa)	3-4 months	milk_microbiome	0.00781601	0.00781601	-0.183312	-0.441387	0.0747626	0.163161	Lower in SVN
milk_macro_micro_34	B1	milk_macro_micro_34__B1	Milk Macro- and Micronutrients	3-4 months	macro_micronutrients	0.00775471	0.00775471	0.110322	-0.14832	0.368965	0.401841	Higher in SVN
maternal_prot_dep_56	P05062	maternal_prot_dep_56__P05062	Maternal Plasma Proteome (Depleted)	5-6 months	prot_dep	0.00772189	0.00772189	0.117279	-0.141322	0.37588	0.372782	Higher in SVN
milk_metabolome_34	rLC_neg_mtb_6087158	milk_metabolome_34__rLC_neg_mtb_6087158	Milk Metabolome	3-4 months	milk_metabolome	0.00766112	0.00766112	0.0235129	-0.235437	0.282463	0.858277	Higher in SVN	560.405	446	negative
infant_vams_34	vam_2037247	infant_vams_34__vam_2037247	Infant VAMS Metabolome (3-4m)	3-4 months	met_vams_infant	-0.00761395	0.00761395	-0.165285	-0.423526	0.0929562	0.208763	Lower in SVN	924.399	0.4	negative
milk_targeted_34	FA.20.2.	milk_targeted_34__FA.20.2.	Milk Targeted Metabolites	3-4 months	targeted_metabolites	0.00761305	0.00761305	0.0623888	-0.196473	0.32125	0.635577	Higher in SVN
maternal_prot_dep_56	O43147	maternal_prot_dep_56__O43147	Maternal Plasma Proteome (Depleted)	5-6 months	prot_dep	-0.0076072	0.0076072	0.0667553	-0.192091	0.325602	0.612104	Higher in SVN
maternal_gene_56	K00334	maternal_gene_56__K00334	Maternal Fecal Metagenome (Genes)	5-6 months	stool_gene_maternal	0.00746371	0.00746371	-0.0856531	-0.344424	0.173117	0.51523	Lower in SVN
infant_gene_56	K03686	infant_gene_56__K03686	Infant Fecal Metagenome (Genes)	5-6 months	stool_gene_infant	-0.00745616	0.00745616	-0.209268	-0.467072	0.0485364	0.111204	Lower in SVN
maternal_vams_56	vam_2020738	maternal_vams_56__vam_2020738	Maternal VAMS Metabolome (5-6m)	5-6 months	met_vams_maternal	-0.00743793	0.00743793	-0.0927114	-0.351449	0.166026	0.481194	Lower in SVN	605.419	402	negative
maternal_taxa_56	Unknown_CAG.433_2	maternal_taxa_56__Unknown_CAG.433_2	Maternal Fecal Microbiome (Taxa)	5-6 months	stool_microbiome_maternal	-0.00742276	0.00742276	-0.155317	-0.413643	0.103009	0.237611	Lower in SVN
maternal_gene_56	K01537	maternal_gene_56__K01537	Maternal Fecal Metagenome (Genes)	5-6 months	stool_gene_maternal	0.00741722	0.00741722	-0.0856162	-0.344387	0.173154	0.515411	Lower in SVN
maternal_prot_nav_56	Q9P1Y5	maternal_prot_nav_56__Q9P1Y5	Maternal Plasma Proteome (Naive)	5-6 months	prot_nav	0.00732785	0.00732785	-0.0414844	-0.300403	0.217435	0.752708	Lower in SVN
infant_gene_56	K00088	infant_gene_56__K00088	Infant Fecal Metagenome (Genes)	5-6 months	stool_gene_infant	-0.00731882	0.00731882	-0.188358	-0.446383	0.0696665	0.151845	Lower in SVN
milk_metabolome_34	rLC_neg_mtb_3678842	milk_metabolome_34__rLC_neg_mtb_3678842	Milk Metabolome	3-4 months	milk_metabolome	0.00715841	0.00715841	0.0511489	-0.207746	0.310044	0.697653	Higher in SVN	370.982	267	negative
infant_gene_56	K01887	infant_gene_56__K01887	Infant Fecal Metagenome (Genes)	5-6 months	stool_gene_infant	-0.00715815	0.00715815	-0.242458	-0.499864	0.0149478	0.0647686	Lower in SVN
milk_macro_micro_34	TRP	milk_macro_micro_34__TRP	Milk Macro- and Micronutrients	3-4 months	macro_micronutrients	-0.00711282	0.00711282	-0.0389862	-0.297911	0.219938	0.767158	Lower in SVN
infant_gene_56	K03531	infant_gene_56__K03531	Infant Fecal Metagenome (Genes)	5-6 months	stool_gene_infant	-0.00707908	0.00707908	-0.207047	-0.464876	0.0507815	0.115065	Lower in SVN
infant_vams_34	vam_1025627	infant_vams_34__vam_1025627	Infant VAMS Metabolome (3-4m)	3-4 months	met_vams_infant	0.00706243	0.00706243	0.0443366	-0.214576	0.303249	0.736315	Higher in SVN	707.539	488	positive
infant_gene_56	K00789	infant_gene_56__K00789	Infant Fecal Metagenome (Genes)	5-6 months	stool_gene_infant	-0.00705737	0.00705737	-0.174502	-0.43266	0.0836564	0.184416	Lower in SVN
maternal_vams_56	vam_2009079	maternal_vams_56__vam_2009079	Maternal VAMS Metabolome (5-6m)	5-6 months	met_vams_maternal	-0.00703223	0.00703223	0.0874786	-0.171284	0.346241	0.50631	Higher in SVN	337.205	406	negative
maternal_vams_56	vam_2013989	maternal_vams_56__vam_2013989	Maternal VAMS Metabolome (5-6m)	5-6 months	met_vams_maternal	-0.00703106	0.00703106	0.0660179	-0.192831	0.324867	0.616041	Higher in SVN	457.297	0.45	negative
maternal_prot_nav_56	P05090	maternal_prot_nav_56__P05090	Maternal Plasma Proteome (Naive)	5-6 months	prot_nav	0.00703087	0.00703087	-0.145777	-0.404179	0.112625	0.267745	Lower in SVN
milk_metabolome_34	rLC_neg_mtb_3646244	milk_metabolome_34__rLC_neg_mtb_3646244	Milk Metabolome	3-4 months	milk_metabolome	0.00699278	0.00699278	-0.0148656	-0.273824	0.244093	0.910114	Lower in SVN	459.085	267	negative
infant_gene_56	K02109	infant_gene_56__K02109	Infant Fecal Metagenome (Genes)	5-6 months	stool_gene_infant	-0.00699233	0.00699233	-0.218804	-0.4765	0.0388914	0.0957651	Lower in SVN
maternal_taxa_56	Prevotella.sp900543975	maternal_taxa_56__Prevotella.sp900543975	Maternal Fecal Microbiome (Taxa)	5-6 months	stool_microbiome_maternal	-0.00697719	0.00697719	0.140046	-0.118399	0.398492	0.287051	Higher in SVN
infant_gene_56	K02112	infant_gene_56__K02112	Infant Fecal Metagenome (Genes)	5-6 months	stool_gene_infant	-0.00695488	0.00695488	-0.207606	-0.465429	0.0502166	0.114084	Lower in SVN
maternal_prot_dep_56	P08709	maternal_prot_dep_56__P08709	Maternal Plasma Proteome (Depleted)	5-6 months	prot_dep	-0.00678399	0.00678399	0.175472	-0.0826776	0.433621	0.181981	Higher in SVN
maternal_gene_56	K07443	maternal_gene_56__K07443	Maternal Fecal Metagenome (Genes)	5-6 months	stool_gene_maternal	0.00667544	0.00667544	-0.0804421	-0.339235	0.178351	0.541133	Lower in SVN
infant_vams_34	vam_2007564	infant_vams_34__vam_2007564	Infant VAMS Metabolome (3-4m)	3-4 months	met_vams_infant	0.00661538	0.00661538	0.0730066	-0.185817	0.33183	0.57918	Higher in SVN	309.066	385	negative
milk_metabolome_34	rLC_neg_mtb_7442591	milk_metabolome_34__rLC_neg_mtb_7442591	Milk Metabolome	3-4 months	milk_metabolome	0.0066114	0.0066114	0.0458625	-0.213046	0.304771	0.727593	Higher in SVN	670.514	544	negative
infant_gene_56	K01000	infant_gene_56__K01000	Infant Fecal Metagenome (Genes)	5-6 months	stool_gene_infant	-0.00659116	0.00659116	-0.233291	-0.490813	0.0242307	0.0756298	Lower in SVN
infant_vams_34	vam_1012394	infant_vams_34__vam_1012394	Infant VAMS Metabolome (3-4m)	3-4 months	met_vams_infant	0.00651794	0.00651794	-0.145913	-0.404314	0.112488	0.267296	Lower in SVN	446.247	321	positive
milk_metabolome_34	rLC_neg_mtb_5173105	milk_metabolome_34__rLC_neg_mtb_5173105	Milk Metabolome	3-4 months	milk_metabolome	0.00649845	0.00649845	0.0974728	-0.16124	0.356186	0.45894	Higher in SVN	468.298	384	negative
infant_vams_34	vam_2007069	infant_vams_34__vam_2007069	Infant VAMS Metabolome (3-4m)	3-4 months	met_vams_infant	0.00648234	0.00648234	-0.103167	-0.36185	0.155515	0.433095	Lower in SVN	298.157	394	negative
maternal_vams_56	vam_1002467	maternal_vams_56__vam_1002467	Maternal VAMS Metabolome (5-6m)	5-6 months	met_vams_maternal	-0.00647473	0.00647473	-0.0610259	-0.319892	0.19784	0.642981	Lower in SVN	191.164	81	positive
maternal_gene_56	K06336	maternal_gene_56__K06336	Maternal Fecal Metagenome (Genes)	5-6 months	stool_gene_maternal	0.00644915	0.00644915	-0.16309	-0.42135	0.0951705	0.214889	Lower in SVN
milk_metabolome_34	rLC_pos_mtb_5111620	milk_metabolome_34__rLC_pos_mtb_5111620	Milk Metabolome	3-4 months	milk_metabolome	0.00642172	0.00642172	0.106202	-0.152465	0.364868	0.419673	Higher in SVN	564.469	345	positive
infant_vams_34	vam_1019448	infant_vams_34__vam_1019448	Infant VAMS Metabolome (3-4m)	3-4 months	met_vams_infant	0.00639763	0.00639763	-0.0185779	-0.277533	0.240377	0.8878	Lower in SVN	603.879	575	positive
infant_gene_56	K02967	infant_gene_56__K02967	Infant Fecal Metagenome (Genes)	5-6 months	stool_gene_infant	-0.0063307	0.0063307	-0.179454	-0.437565	0.0786581	0.172232	Lower in SVN
milk_metabolome_34	rLC_pos_mtb_5143354	milk_metabolome_34__rLC_pos_mtb_5143354	Milk Metabolome	3-4 months	milk_metabolome	0.0062744	0.0062744	0.0918016	-0.16694	0.350543	0.485512	Higher in SVN	524.477	341	positive
milk_metabolome_34	rLC_neg_mtb_6390662	milk_metabolome_34__rLC_neg_mtb_6390662	Milk Metabolome	3-4 months	milk_metabolome	0.00627406	0.00627406	0.0138888	-0.245071	0.272848	0.915998	Higher in SVN	730.442	473	negative
infant_gene_56	K03595	infant_gene_56__K03595	Infant Fecal Metagenome (Genes)	5-6 months	stool_gene_infant	-0.00611898	0.00611898	-0.179843	-0.437951	0.0782655	0.171301	Lower in SVN
maternal_gene_56	K06384	maternal_gene_56__K06384	Maternal Fecal Metagenome (Genes)	5-6 months	stool_gene_maternal	-0.00604025	0.00604025	-0.0374997	-0.296427	0.221428	0.775795	Lower in SVN
milk_bioactive_34	IgA	milk_bioactive_34__IgA	Milk Bioactive Proteins	3-4 months	bioactive_proteins	0.00602748	0.00602748	-0.1173	-0.3759	0.141301	0.372699	Lower in SVN
maternal_vams_56	vam_1017566	maternal_vams_56__vam_1017566	Maternal VAMS Metabolome (5-6m)	5-6 months	met_vams_maternal	-0.00597684	0.00597684	0.0353183	-0.223613	0.29425	0.78852	Higher in SVN	551.165	567	positive	E1685	C11376	SN38 glucuronide; SN-38G
maternal_vams_56	vam_1002542	maternal_vams_56__vam_1002542	Maternal VAMS Metabolome (5-6m)	5-6 months	met_vams_maternal	-0.00594024	0.00594024	0.0181541	-0.240802	0.27711	0.890343	Higher in SVN	193.122	492	positive
maternal_taxa_56	Unknown_UBA4636.8	maternal_taxa_56__Unknown_UBA4636.8	Maternal Fecal Microbiome (Taxa)	5-6 months	stool_microbiome_maternal	-0.00593991	0.00593991	0.102328	-0.156359	0.361016	0.436851	Higher in SVN
infant_gene_56	K03655	infant_gene_56__K03655	Infant Fecal Metagenome (Genes)	5-6 months	stool_gene_infant	-0.00587976	0.00587976	-0.204681	-0.462535	0.0531741	0.119295	Lower in SVN
milk_macro_micro_34	Ca	milk_macro_micro_34__Ca	Milk Macro- and Micronutrients	3-4 months	macro_micronutrients	0.00585174	0.00585174	0.0197731	-0.239181	0.278727	0.880634	Higher in SVN
maternal_vams_56	vam_1013680	maternal_vams_56__vam_1013680	Maternal VAMS Metabolome (5-6m)	5-6 months	met_vams_maternal	-0.00582927	0.00582927	-0.142749	-0.401174	0.115677	0.277833	Lower in SVN	475.339	363	positive	E754	CE1277;CE1278;CE1279;CE4874	5beta-cholestane-3alpha,7alpha,12alpha,23,25-pentol$5beta-cholestane-3alpha,7alpha,12alpha,25,27-pentol$5beta-cholestane-3alpha,7alpha,12alpha,24R,25-pentol$5beta-cholestane-3alpha,7alpha,12alpha,27,27-pentaol
milk_taxa_34	Comamonas_F_589250.sp5	milk_taxa_34__Comamonas_F_589250.sp5	Milk Microbiome (Taxa)	3-4 months	milk_microbiome	-0.00581345	0.00581345	0.0537391	-0.205149	0.312627	0.683149	Higher in SVN
maternal_prot_nav_56	A0A075B6J9	maternal_prot_nav_56__A0A075B6J9	Maternal Plasma Proteome (Naive)	5-6 months	prot_nav	0.00573598	0.00573598	-0.0386732	-0.297598	0.220252	0.768974	Lower in SVN
infant_vams_34	vam_1025073	infant_vams_34__vam_1025073	Infant VAMS Metabolome (3-4m)	3-4 months	met_vams_infant	0.00559599	0.00559599	0.213902	-0.0438497	0.471655	0.103473	Higher in SVN	697.454	0.49	positive
maternal_vams_56	vam_1015027	maternal_vams_56__vam_1015027	Maternal VAMS Metabolome (5-6m)	5-6 months	met_vams_maternal	0.00556153	0.00556153	-0.0986134	-0.357321	0.160094	0.453695	Lower in SVN	501.285	333	positive
maternal_taxa_56	Unknown_Lachnospiraceae.2	maternal_taxa_56__Unknown_Lachnospiraceae.2	Maternal Fecal Microbiome (Taxa)	5-6 months	stool_microbiome_maternal	-0.00554737	0.00554737	-0.0885787	-0.347336	0.170178	0.500973	Lower in SVN
milk_targeted_34	CE.18.3.	milk_targeted_34__CE.18.3.	Milk Targeted Metabolites	3-4 months	targeted_metabolites	0.00551844	0.00551844	-0.10424	-0.362917	0.154437	0.428323	Lower in SVN
maternal_gene_56	K01990	maternal_gene_56__K01990	Maternal Fecal Metagenome (Genes)	5-6 months	stool_gene_maternal	0.00548085	0.00548085	-0.0518795	-0.310773	0.207014	0.693551	Lower in SVN
infant_gene_56	K00954	infant_gene_56__K00954	Infant Fecal Metagenome (Genes)	5-6 months	stool_gene_infant	-0.00546834	0.00546834	-0.184018	-0.442085	0.0740502	0.161542	Lower in SVN
milk_macro_micro_34	NAD	milk_macro_micro_34__NAD	Milk Macro- and Micronutrients	3-4 months	macro_micronutrients	-0.00546524	0.00546524	0.0356264	-0.223305	0.294557	0.786719	Higher in SVN
maternal_prot_dep_56	P32942	maternal_prot_dep_56__P32942	Maternal Plasma Proteome (Depleted)	5-6 months	prot_dep	-0.00539791	0.00539791	0.0706609	-0.188172	0.329493	0.591438	Higher in SVN
milk_taxa_34	Actinomyces.graevenitzii	milk_taxa_34__Actinomyces.graevenitzii	Milk Microbiome (Taxa)	3-4 months	milk_microbiome	-0.00536721	0.00536721	-0.155644	-0.413967	0.102679	0.236624	Lower in SVN
maternal_gene_56	K06142	maternal_gene_56__K06142	Maternal Fecal Metagenome (Genes)	5-6 months	stool_gene_maternal	-0.0053585	0.0053585	0.198575	-0.0593448	0.456495	0.130768	Higher in SVN
maternal_gene_56	K19271	maternal_gene_56__K19271	Maternal Fecal Metagenome (Genes)	5-6 months	stool_gene_maternal	0.00526558	0.00526558	-0.11252	-0.37115	0.14611	0.392518	Lower in SVN
stool_scfa_56	Caproate	stool_scfa_56__Caproate	Infant Fecal SCFAs	5-6 months	stool_scfa_infant	0.0052654	0.0052654	0.152367	-0.105983	0.410717	0.246663	Higher in SVN
maternal_vams_56	vam_2005092	maternal_vams_56__vam_2005092	Maternal VAMS Metabolome (5-6m)	5-6 months	met_vams_maternal	0.00525044	0.00525044	-0.165162	-0.423404	0.0930803	0.209103	Lower in SVN	254.081	213	negative
maternal_prot_nav_56	P22792	maternal_prot_nav_56__P22792	Maternal Plasma Proteome (Naive)	5-6 months	prot_nav	0.005249	0.005249	0.124298	-0.134258	0.382853	0.344815	Higher in SVN
milk_metabolome_34	rLC_neg_mtb_6823469	milk_metabolome_34__rLC_neg_mtb_6823469	Milk Metabolome	3-4 months	milk_metabolome	0.00522909	0.00522909	0.0210168	-0.237936	0.27997	0.873188	Higher in SVN	753.494	0.5	negative
milk_macro_micro_34	Zn	milk_macro_micro_34__Zn	Milk Macro- and Micronutrients	3-4 months	macro_micronutrients	-0.00519231	0.00519231	-0.0911847	-0.349929	0.16756	0.488451	Lower in SVN
infant_gene_56	K02988	infant_gene_56__K02988	Infant Fecal Metagenome (Genes)	5-6 months	stool_gene_infant	-0.00516433	0.00516433	-0.216439	-0.474162	0.0412844	0.0994257	Lower in SVN
maternal_taxa_56	Unknown_Faecalibacterium.7	maternal_taxa_56__Unknown_Faecalibacterium.7	Maternal Fecal Microbiome (Taxa)	5-6 months	stool_microbiome_maternal	-0.00514462	0.00514462	-0.0814338	-0.340223	0.177355	0.536154	Lower in SVN
infant_vams_34	vam_1001280	infant_vams_34__vam_1001280	Infant VAMS Metabolome (3-4m)	3-4 months	met_vams_infant	0.00512194	0.00512194	0.0273411	-0.231604	0.286286	0.835507	Higher in SVN	156.011	319	positive
infant_gene_56	K03046	infant_gene_56__K03046	Infant Fecal Metagenome (Genes)	5-6 months	stool_gene_infant	-0.00510772	0.00510772	-0.167997	-0.426214	0.0902205	0.201371	Lower in SVN
maternal_prot_dep_56	Q12860	maternal_prot_dep_56__Q12860	Maternal Plasma Proteome (Depleted)	5-6 months	prot_dep	-0.00509734	0.00509734	-0.00819401	-0.267157	0.250769	0.950382	Lower in SVN
milk_targeted_34	DHA	milk_targeted_34__DHA	Milk Targeted Metabolites	3-4 months	targeted_metabolites	0.00506026	0.00506026	0.0521242	-0.206768	0.311017	0.692179	Higher in SVN
milk_targeted_34	Cit	milk_targeted_34__Cit	Milk Targeted Metabolites	3-4 months	targeted_metabolites	0.00499917	0.00499917	-0.0371792	-0.296107	0.221749	0.777661	Lower in SVN
milk_taxa_34	Bacillus_P_294101.sp6	milk_taxa_34__Bacillus_P_294101.sp6	Milk Microbiome (Taxa)	3-4 months	milk_microbiome	0.00498132	0.00498132	0.0190637	-0.239891	0.278019	0.884887	Higher in SVN
milk_targeted_34	DG.18.1_18.2.	milk_targeted_34__DG.18.1_18.2.	Milk Targeted Metabolites	3-4 months	targeted_metabolites	-0.004956	0.004956	-0.0333649	-0.2923	0.22557	0.799962	Lower in SVN
maternal_vams_56	vam_1027022	maternal_vams_56__vam_1027022	Maternal VAMS Metabolome (5-6m)	5-6 months	met_vams_maternal	0.00492735	0.00492735	0.0540898	-0.204797	0.312977	0.681195	Higher in SVN	729.588	458	positive
milk_metabolome_34	rLC_neg_mtb_3610365	milk_metabolome_34__rLC_neg_mtb_3610365	Milk Metabolome	3-4 months	milk_metabolome	0.00490048	0.00490048	0.217858	-0.0398489	0.475565	0.0972166	Higher in SVN	285.119	269	negative
infant_gene_56	K02520	infant_gene_56__K02520	Infant Fecal Metagenome (Genes)	5-6 months	stool_gene_infant	-0.00488034	0.00488034	-0.173093	-0.431265	0.0850779	0.187995	Lower in SVN
maternal_vams_56	vam_2033712	maternal_vams_56__vam_2033712	Maternal VAMS Metabolome (5-6m)	5-6 months	met_vams_maternal	0.0048678	0.0048678	-0.020985	-0.279938	0.237968	0.873378	Lower in SVN	843.659	644	negative	E1971	C11378
milk_targeted_34	FA.18.2.	milk_targeted_34__FA.18.2.	Milk Targeted Metabolites	3-4 months	targeted_metabolites	-0.00482022	0.00482022	0.0972155	-0.161499	0.35593	0.460128	Higher in SVN
milk_hmo_34	Diversity	milk_hmo_34__Diversity	Milk HMOs	3-4 months	hmos	-0.00476613	0.00476613	0.121093	-0.137483	0.37967	0.357414	Higher in SVN
milk_hmo_34	Evenness	milk_hmo_34__Evenness	Milk HMOs	3-4 months	hmos	-0.00476613	0.00476613	0.121093	-0.137483	0.37967	0.357414	Higher in SVN
milk_targeted_34	DG.18.1_18.3.	milk_targeted_34__DG.18.1_18.3.	Milk Targeted Metabolites	3-4 months	targeted_metabolites	0.00470831	0.00470831	0.0648679	-0.193985	0.323721	0.622204	Higher in SVN
maternal_vams_56	vam_2031958	maternal_vams_56__vam_2031958	Maternal VAMS Metabolome (5-6m)	5-6 months	met_vams_maternal	-0.00469779	0.00469779	0.33017	0.074103	0.586236	0.0116849	Higher in SVN	821.59	631	negative
maternal_prot_nav_56	O75636	maternal_prot_nav_56__O75636	Maternal Plasma Proteome (Naive)	5-6 months	prot_nav	-0.00467279	0.00467279	0.0505214	-0.208376	0.309418	0.701184	Higher in SVN
maternal_taxa_56	Unknown_Coprococcus.1	maternal_taxa_56__Unknown_Coprococcus.1	Maternal Fecal Microbiome (Taxa)	5-6 months	stool_microbiome_maternal	0.00465366	0.00465366	-0.106196	-0.364862	0.152471	0.4197	Lower in SVN
milk_targeted_34	TG.18.3_30.0.	milk_targeted_34__TG.18.3_30.0.	Milk Targeted Metabolites	3-4 months	targeted_metabolites	0.00463793	0.00463793	0.172984	-0.0851878	0.431157	0.188274	Higher in SVN
maternal_taxa_56	Unknown_UMGS1933	maternal_taxa_56__Unknown_UMGS1933	Maternal Fecal Microbiome (Taxa)	5-6 months	stool_microbiome_maternal	0.00462841	0.00462841	0.170962	-0.0872283	0.429153	0.193506	Higher in SVN
milk_taxa_34	Rothia.amarae.1	milk_taxa_34__Rothia.amarae.1	Milk Microbiome (Taxa)	3-4 months	milk_microbiome	0.00461996	0.00461996	-0.0587667	-0.31764	0.200106	0.655331	Lower in SVN
milk_taxa_34	Acinetobacter.towneri_A	milk_taxa_34__Acinetobacter.towneri_A	Milk Microbiome (Taxa)	3-4 months	milk_microbiome	0.00456356	0.00456356	0.258771	0.00158321	0.51596	0.0486157	Higher in SVN
infant_gene_56	K02503	infant_gene_56__K02503	Infant Fecal Metagenome (Genes)	5-6 months	stool_gene_infant	-0.0045537	0.0045537	-0.190396	-0.4484	0.0676086	0.147449	Lower in SVN
maternal_prot_nav_56	P01860	maternal_prot_nav_56__P01860	Maternal Plasma Proteome (Naive)	5-6 months	prot_nav	0.00453357	0.00453357	-0.014458	-0.273417	0.244501	0.912569	Lower in SVN
maternal_taxa_56	Prevotella.sp900553595	maternal_taxa_56__Prevotella.sp900553595	Maternal Fecal Microbiome (Taxa)	5-6 months	stool_microbiome_maternal	-0.00451202	0.00451202	0.208721	-0.0490894	0.466531	0.112145	Higher in SVN
milk_metabolome_34	rLC_neg_mtb_1175098	milk_metabolome_34__rLC_neg_mtb_1175098	Milk Metabolome	3-4 months	milk_metabolome	0.00448821	0.00448821	-0.147602	-0.40599	0.110785	0.261785	Lower in SVN	714.743	89	negative
maternal_prot_nav_56	Q14624	maternal_prot_nav_56__Q14624	Maternal Plasma Proteome (Naive)	5-6 months	prot_nav	0.00445817	0.00445817	0.0836381	-0.175141	0.342418	0.52517	Higher in SVN
maternal_taxa_56	Unknown_UMGS1326.1	maternal_taxa_56__Unknown_UMGS1326.1	Maternal Fecal Microbiome (Taxa)	5-6 months	stool_microbiome_maternal	0.00442952	0.00442952	-0.0439326	-0.302846	0.214981	0.73863	Lower in SVN
milk_metabolome_34	rLC_pos_mtb_4189981	milk_metabolome_34__rLC_pos_mtb_4189981	Milk Metabolome	3-4 months	milk_metabolome	0.00441443	0.00441443	-0.0456935	-0.304603	0.213216	0.728557	Lower in SVN	535.429	291	positive
maternal_taxa_56	Parolsenella.massiliensis	maternal_taxa_56__Parolsenella.massiliensis	Maternal Fecal Microbiome (Taxa)	5-6 months	stool_microbiome_maternal	0.00440888	0.00440888	-0.0616965	-0.32056	0.197167	0.639334	Lower in SVN
milk_taxa_34	Rhodococcus_C_375578.sp8	milk_taxa_34__Rhodococcus_C_375578.sp8	Milk Microbiome (Taxa)	3-4 months	milk_microbiome	-0.00437492	0.00437492	-0.0369308	-0.295859	0.221998	0.779108	Lower in SVN
milk_metabolome_34	rLC_neg_mtb_1208629	milk_metabolome_34__rLC_neg_mtb_1208629	Milk Metabolome	3-4 months	milk_metabolome	-0.00436426	0.00436426	0.0495107	-0.209389	0.30841	0.706884	Higher in SVN	641.193	93	negative
infant_gene_56	K06153	infant_gene_56__K06153	Infant Fecal Metagenome (Genes)	5-6 months	stool_gene_infant	-0.00436424	0.00436424	-0.16478	-0.423026	0.0934653	0.21016	Lower in SVN
maternal_prot_dep_56	P49747	maternal_prot_dep_56__P49747	Maternal Plasma Proteome (Depleted)	5-6 months	prot_dep	0.00435602	0.00435602	-0.168765	-0.426976	0.0894451	0.199311	Lower in SVN
maternal_gene_56	K25152	maternal_gene_56__K25152	Maternal Fecal Metagenome (Genes)	5-6 months	stool_gene_maternal	0.00435442	0.00435442	-0.0608604	-0.319727	0.198006	0.643883	Lower in SVN
infant_gene_56	K11753	infant_gene_56__K11753	Infant Fecal Metagenome (Genes)	5-6 months	stool_gene_infant	-0.00435096	0.00435096	-0.187936	-0.445965	0.0700928	0.152768	Lower in SVN
infant_vams_34	vam_2000627	infant_vams_34__vam_2000627	Infant VAMS Metabolome (3-4m)	3-4 months	met_vams_infant	-0.00431671	0.00431671	-0.107185	-0.365845	0.151476	0.415378	Lower in SVN	125.024	146	negative
infant_vams_34	vam_2005581	infant_vams_34__vam_2005581	Infant VAMS Metabolome (3-4m)	3-4 months	met_vams_infant	-0.00429531	0.00429531	-0.0525879	-0.311479	0.206303	0.689582	Lower in SVN	264.997	617	negative
infant_gene_56	K03110	infant_gene_56__K03110	Infant Fecal Metagenome (Genes)	5-6 months	stool_gene_infant	-0.00429487	0.00429487	-0.172136	-0.430316	0.0860442	0.190457	Lower in SVN
maternal_gene_56	K18954	maternal_gene_56__K18954	Maternal Fecal Metagenome (Genes)	5-6 months	stool_gene_maternal	0.00427922	0.00427922	0.097258	-0.161456	0.355972	0.459931	Higher in SVN
maternal_taxa_56	CAG.484.sp900321895	maternal_taxa_56__CAG.484.sp900321895	Maternal Fecal Microbiome (Taxa)	5-6 months	stool_microbiome_maternal	-0.00424298	0.00424298	0.14713	-0.111261	0.405522	0.263317	Higher in SVN
maternal_gene_56	K06334	maternal_gene_56__K06334	Maternal Fecal Metagenome (Genes)	5-6 months	stool_gene_maternal	-0.00423487	0.00423487	-0.0480375	-0.306941	0.210866	0.715222	Lower in SVN
maternal_taxa_56	ER4.sp900556145	maternal_taxa_56__ER4.sp900556145	Maternal Fecal Microbiome (Taxa)	5-6 months	stool_microbiome_maternal	0.00423429	0.00423429	-0.0861169	-0.344885	0.172651	0.512956	Lower in SVN
milk_targeted_34	DG.16.1_18.0.	milk_targeted_34__DG.16.1_18.0.	Milk Targeted Metabolites	3-4 months	targeted_metabolites	0.00418659	0.00418659	-0.0292872	-0.288229	0.229655	0.823983	Lower in SVN
maternal_taxa_56	Unknown_CAG.884.4	maternal_taxa_56__Unknown_CAG.884.4	Maternal Fecal Microbiome (Taxa)	5-6 months	stool_microbiome_maternal	0.00418643	0.00418643	0.115789	-0.142821	0.374398	0.378896	Higher in SVN
maternal_taxa_56	Lachnospira.eligens_B	maternal_taxa_56__Lachnospira.eligens_B	Maternal Fecal Microbiome (Taxa)	5-6 months	stool_microbiome_maternal	0.0041815	0.0041815	0.0546447	-0.204241	0.31353	0.678106	Higher in SVN
maternal_vams_56	vam_1011894	maternal_vams_56__vam_1011894	Maternal VAMS Metabolome (5-6m)	5-6 months	met_vams_maternal	0.00415521	0.00415521	-0.23926	-0.496707	0.0181867	0.0684022	Lower in SVN	434.238	319	positive
milk_macro_micro_34	PA	milk_macro_micro_34__PA	Milk Macro- and Micronutrients	3-4 months	macro_micronutrients	0.00407074	0.00407074	0.186624	-0.0714186	0.444666	0.155666	Higher in SVN
infant_vams_34	vam_1006545	infant_vams_34__vam_1006545	Infant VAMS Metabolome (3-4m)	3-4 months	met_vams_infant	0.00406203	0.00406203	0.120024	-0.138559	0.378608	0.36168	Higher in SVN	312.084	319	positive
infant_gene_56	K06942	infant_gene_56__K06942	Infant Fecal Metagenome (Genes)	5-6 months	stool_gene_infant	-0.00402167	0.00402167	-0.17613	-0.434273	0.0820128	0.180341	Lower in SVN
maternal_prot_nav_56	P55058	maternal_prot_nav_56__P55058	Maternal Plasma Proteome (Naive)	5-6 months	prot_nav	-0.00401544	0.00401544	0.0845308	-0.174245	0.343306	0.520754	Higher in SVN
maternal_vams_56	vam_1025073	maternal_vams_56__vam_1025073	Maternal VAMS Metabolome (5-6m)	5-6 months	met_vams_maternal	0.00397628	0.00397628	-0.0608967	-0.319763	0.19797	0.643685	Lower in SVN	697.454	0.49	positive
infant_vams_34	vam_1006546	infant_vams_34__vam_1006546	Infant VAMS Metabolome (3-4m)	3-4 months	met_vams_infant	0.00390563	0.00390563	0.00785946	-0.251103	0.266822	0.952405	Higher in SVN	312.083	342	positive
maternal_taxa_56	Parolsenella.sp900552935	maternal_taxa_56__Parolsenella.sp900552935	Maternal Fecal Microbiome (Taxa)	5-6 months	stool_microbiome_maternal	0.00390305	0.00390305	-0.0915716	-0.350314	0.167171	0.486606	Lower in SVN
maternal_vams_56	vam_1002529	maternal_vams_56__vam_1002529	Maternal VAMS Metabolome (5-6m)	5-6 months	met_vams_maternal	0.00382915	0.00382915	0.189924	-0.0680849	0.447934	0.148457	Higher in SVN	193.086	325	positive	E396	C02325	Sinapyl alcohol; Sinapoyl alcohol
milk_metabolome_34	rLC_neg_mtb_5405324	milk_metabolome_34__rLC_neg_mtb_5405324	Milk Metabolome	3-4 months	milk_metabolome	0.00382795	0.00382795	0.0273069	-0.231638	0.286252	0.83571	Higher in SVN	455.282	397	negative
milk_targeted_34	DG.17.0_18.1.	milk_targeted_34__DG.17.0_18.1.	Milk Targeted Metabolites	3-4 months	targeted_metabolites	-0.00381256	0.00381256	0.105892	-0.152776	0.36456	0.421031	Higher in SVN
infant_vams_34	vam_2004530	infant_vams_34__vam_2004530	Infant VAMS Metabolome (3-4m)	3-4 months	met_vams_infant	0.00378478	0.00378478	0.329937	0.0738667	0.586008	0.0117446	Higher in SVN	234.031	633	negative
maternal_gene_56	GH141_0	maternal_gene_56__GH141_0	Maternal Fecal Metagenome (Genes)	5-6 months	stool_gene_maternal	0.00377155	0.00377155	-0.127299	-0.385834	0.131237	0.333274	Lower in SVN
infant_vams_34	vam_1033283	infant_vams_34__vam_1033283	Infant VAMS Metabolome (3-4m)	3-4 months	met_vams_infant	-0.00377046	0.00377046	0.117426	-0.141174	0.376026	0.372183	Higher in SVN	844.539	0.59	positive
milk_taxa_34	Bacillus_P_294101.sp3	milk_taxa_34__Bacillus_P_294101.sp3	Milk Microbiome (Taxa)	3-4 months	milk_microbiome	-0.00373986	0.00373986	-0.0244139	-0.283363	0.234535	0.852907	Lower in SVN
maternal_taxa_56	CAG.533.sp900551105	maternal_taxa_56__CAG.533.sp900551105	Maternal Fecal Microbiome (Taxa)	5-6 months	stool_microbiome_maternal	-0.00372279	0.00372279	0.217436	-0.0402761	0.475147	0.0978698	Higher in SVN
maternal_prot_dep_56	P43490	maternal_prot_dep_56__P43490	Maternal Plasma Proteome (Depleted)	5-6 months	prot_dep	0.00372131	0.00372131	-0.235951	-0.49344	0.0215371	0.0723353	Lower in SVN
maternal_vams_56	vam_2004947	maternal_vams_56__vam_2004947	Maternal VAMS Metabolome (5-6m)	5-6 months	met_vams_maternal	-0.00372075	0.00372075	-0.0575845	-0.316461	0.201292	0.661832	Lower in SVN	249.037	0.06	negative	E521	C01817
milk_targeted_34	DG.16.0_18.2.	milk_targeted_34__DG.16.0_18.2.	Milk Targeted Metabolites	3-4 months	targeted_metabolites	0.0037177	0.0037177	0.109933	-0.148712	0.368577	0.403508	Higher in SVN
infant_vams_34	vam_2022347	infant_vams_34__vam_2022347	Infant VAMS Metabolome (3-4m)	3-4 months	met_vams_infant	0.00369468	0.00369468	0.0286536	-0.230289	0.287596	0.827732	Higher in SVN	638.429	402	negative
milk_taxa_34	Luteimonas_C_615545.sp1	milk_taxa_34__Luteimonas_C_615545.sp1	Milk Microbiome (Taxa)	3-4 months	milk_microbiome	-0.00369255	0.00369255	-0.0679037	-0.326746	0.190939	0.605994	Lower in SVN
maternal_prot_dep_56	Q08380	maternal_prot_dep_56__Q08380	Maternal Plasma Proteome (Depleted)	5-6 months	prot_dep	0.0036892	0.0036892	0.00932833	-0.249634	0.26829	0.943523	Higher in SVN
maternal_taxa_56	Prevotella.sp002251385	maternal_taxa_56__Prevotella.sp002251385	Maternal Fecal Microbiome (Taxa)	5-6 months	stool_microbiome_maternal	-0.00368473	0.00368473	0.120366	-0.138216	0.378947	0.360315	Higher in SVN
maternal_taxa_56	Unknown_Acetatifactor.1	maternal_taxa_56__Unknown_Acetatifactor.1	Maternal Fecal Microbiome (Taxa)	5-6 months	stool_microbiome_maternal	-0.00358015	0.00358015	-0.0555564	-0.314439	0.203326	0.673042	Lower in SVN
maternal_prot_dep_56	Q8WTT2	maternal_prot_dep_56__Q8WTT2	Maternal Plasma Proteome (Depleted)	5-6 months	prot_dep	-0.00356777	0.00356777	-0.211761	-0.469537	0.0460153	0.10699	Lower in SVN
maternal_taxa_56	Prevotella.sp002299635	maternal_taxa_56__Prevotella.sp002299635	Maternal Fecal Microbiome (Taxa)	5-6 months	stool_microbiome_maternal	0.00354944	0.00354944	0.0866315	-0.172135	0.345397	0.510439	Higher in SVN
maternal_gene_56	CBM32_0	maternal_gene_56__CBM32_0	Maternal Fecal Metagenome (Genes)	5-6 months	stool_gene_maternal	0.00354416	0.00354416	0.109247	-0.149401	0.367896	0.406449	Higher in SVN
milk_targeted_34	TG.18.2_36.4.	milk_targeted_34__TG.18.2_36.4.	Milk Targeted Metabolites	3-4 months	targeted_metabolites	-0.00352818	0.00352818	0.00991713	-0.249045	0.268879	0.939965	Higher in SVN
infant_vams_34	vam_2000601	infant_vams_34__vam_2000601	Infant VAMS Metabolome (3-4m)	3-4 months	met_vams_infant	0.00349636	0.00349636	-0.0887444	-0.347501	0.170012	0.500172	Lower in SVN	123.008	54	negative	E1116	CE5068	2-methylglutaconic acid
maternal_prot_dep_56	P62495	maternal_prot_dep_56__P62495	Maternal Plasma Proteome (Depleted)	5-6 months	prot_dep	-0.00347718	0.00347718	-0.118435	-0.377028	0.140159	0.368083	Lower in SVN
maternal_prot_dep_56	Q86VB7	maternal_prot_dep_56__Q86VB7	Maternal Plasma Proteome (Depleted)	5-6 months	prot_dep	-0.00341943	0.00341943	0.0881208	-0.170638	0.34688	0.50319	Higher in SVN
infant_vams_34	vam_2021687	infant_vams_34__vam_2021687	Infant VAMS Metabolome (3-4m)	3-4 months	met_vams_infant	-0.00341874	0.00341874	-0.0817262	-0.340514	0.177062	0.534691	Lower in SVN	624.96	629	negative
maternal_prot_dep_56	Q9Y2M2	maternal_prot_dep_56__Q9Y2M2	Maternal Plasma Proteome (Depleted)	5-6 months	prot_dep	-0.00340563	0.00340563	-0.0543032	-0.31319	0.204583	0.680006	Lower in SVN
milk_hmo_34	LNFP II_nmol/mL	milk_hmo_34__LNFP II_nmol/mL	Milk HMOs	3-4 months	hmos	0.00337561	0.00337561	-0.0419105	-0.300829	0.217007	0.750251	Lower in SVN
infant_vams_34	vam_1030341	infant_vams_34__vam_1030341	Infant VAMS Metabolome (3-4m)	3-4 months	met_vams_infant	-0.00336852	0.00336852	-0.0998111	-0.358512	0.15889	0.448225	Lower in SVN	797.299	519	positive
maternal_vams_56	vam_1011857	maternal_vams_56__vam_1011857	Maternal VAMS Metabolome (5-6m)	5-6 months	met_vams_maternal	0.00334589	0.00334589	-0.120929	-0.379507	0.137649	0.358068	Lower in SVN	433.178	344	positive
maternal_vams_56	vam_1016158	maternal_vams_56__vam_1016158	Maternal VAMS Metabolome (5-6m)	5-6 months	met_vams_maternal	0.00331675	0.00331675	-0.087952	-0.346712	0.170808	0.504009	Lower in SVN	522.294	452	positive
infant_vams_34	vam_1006282	infant_vams_34__vam_1006282	Infant VAMS Metabolome (3-4m)	3-4 months	met_vams_infant	-0.00328704	0.00328704	-0.212847	-0.470611	0.0449167	0.105194	Lower in SVN	305.303	379	positive
infant_gene_56	K02115	infant_gene_56__K02115	Infant Fecal Metagenome (Genes)	5-6 months	stool_gene_infant	-0.00328497	0.00328497	-0.192556	-0.450539	0.0654262	0.142893	Lower in SVN
infant_gene_56	K02519	infant_gene_56__K02519	Infant Fecal Metagenome (Genes)	5-6 months	stool_gene_infant	-0.00327173	0.00327173	-0.185888	-0.443938	0.0721612	0.157308	Lower in SVN
milk_targeted_34	lysoPC.a.C20.4	milk_targeted_34__lysoPC.a.C20.4	Milk Targeted Metabolites	3-4 months	targeted_metabolites	-0.00326804	0.00326804	0.243218	-0.0141775	0.500614	0.0639283	Higher in SVN
maternal_gene_56	3000833	maternal_gene_56__3000833	Maternal Fecal Metagenome (Genes)	5-6 months	stool_gene_maternal	0.00326358	0.00326358	0.0404008	-0.21852	0.299322	0.758965	Higher in SVN
maternal_gene_56	K25763	maternal_gene_56__K25763	Maternal Fecal Metagenome (Genes)	5-6 months	stool_gene_maternal	0.00326335	0.00326335	-0.00826823	-0.267231	0.250694	0.949933	Lower in SVN
maternal_prot_dep_56	P12821	maternal_prot_dep_56__P12821	Maternal Plasma Proteome (Depleted)	5-6 months	prot_dep	-0.00322133	0.00322133	-0.0794186	-0.338216	0.179379	0.546296	Lower in SVN
infant_gene_56	K06941	infant_gene_56__K06941	Infant Fecal Metagenome (Genes)	5-6 months	stool_gene_infant	-0.00321357	0.00321357	-0.192168	-0.450154	0.0658185	0.143704	Lower in SVN
maternal_prot_nav_56	Q9P2S6	maternal_prot_nav_56__Q9P2S6	Maternal Plasma Proteome (Naive)	5-6 months	prot_nav	-0.00320687	0.00320687	0.30474	0.0482424	0.561238	0.0200525	Higher in SVN
milk_metabolome_34	rLC_neg_mtb_3612715	milk_metabolome_34__rLC_neg_mtb_3612715	Milk Metabolome	3-4 months	milk_metabolome	0.00319413	0.00319413	0.12407	-0.134487	0.382627	0.3457	Higher in SVN	427.13	269	negative
maternal_vams_56	vam_2001474	maternal_vams_56__vam_2001474	Maternal VAMS Metabolome (5-6m)	5-6 months	met_vams_maternal	-0.00313122	0.00313122	0.0299834	-0.228957	0.288924	0.81987	Higher in SVN	146.983	208	negative
maternal_prot_dep_56	P02765	maternal_prot_dep_56__P02765	Maternal Plasma Proteome (Depleted)	5-6 months	prot_dep	-0.00311853	0.00311853	-0.185548	-0.443601	0.072505	0.158072	Lower in SVN
maternal_vams_56	vam_2037216	maternal_vams_56__vam_2037216	Maternal VAMS Metabolome (5-6m)	5-6 months	met_vams_maternal	0.00308766	0.00308766	-0.120919	-0.379497	0.137658	0.358106	Lower in SVN	923.4	0.4	negative
infant_vams_34	vam_2033712	infant_vams_34__vam_2033712	Infant VAMS Metabolome (3-4m)	3-4 months	met_vams_infant	0.00308592	0.00308592	-0.0775033	-0.336309	0.181302	0.556021	Lower in SVN	843.659	644	negative	E806	C11378
maternal_gene_56	K10966	maternal_gene_56__K10966	Maternal Fecal Metagenome (Genes)	5-6 months	stool_gene_maternal	-0.00308338	0.00308338	0.0587283	-0.200145	0.317602	0.655542	Higher in SVN
maternal_gene_56	K02654	maternal_gene_56__K02654	Maternal Fecal Metagenome (Genes)	5-6 months	stool_gene_maternal	-0.00308016	0.00308016	0.0511769	-0.207718	0.310072	0.697496	Higher in SVN
stool_scfa_56	Propionate	stool_scfa_56__Propionate	Infant Fecal SCFAs	5-6 months	stool_scfa_infant	-0.00301277	0.00301277	0.0243703	-0.234578	0.283319	0.853166	Higher in SVN
infant_gene_56	K01956	infant_gene_56__K01956	Infant Fecal Metagenome (Genes)	5-6 months	stool_gene_infant	-0.003003	0.003003	-0.171148	-0.429337	0.0870413	0.193022	Lower in SVN
maternal_prot_dep_56	Q6YHK3	maternal_prot_dep_56__Q6YHK3	Maternal Plasma Proteome (Depleted)	5-6 months	prot_dep	-0.00299922	0.00299922	0.0708035	-0.188028	0.329635	0.590689	Higher in SVN
infant_vams_34	vam_2032504	infant_vams_34__vam_2032504	Infant VAMS Metabolome (3-4m)	3-4 months	met_vams_infant	-0.00297225	0.00297225	-0.0791376	-0.337936	0.179661	0.547717	Lower in SVN	828.989	183	negative
maternal_vams_56	vam_2022824	maternal_vams_56__vam_2022824	Maternal VAMS Metabolome (5-6m)	5-6 months	met_vams_maternal	0.00292487	0.00292487	-0.0823004	-0.341086	0.176485	0.531822	Lower in SVN	647.489	402	negative
maternal_gene_56	GH31_0	maternal_gene_56__GH31_0	Maternal Fecal Metagenome (Genes)	5-6 months	stool_gene_maternal	0.00292217	0.00292217	0.0032969	-0.255667	0.262261	0.980025	Higher in SVN
milk_targeted_34	DG.16.1_18.1.	milk_targeted_34__DG.16.1_18.1.	Milk Targeted Metabolites	3-4 months	targeted_metabolites	0.00290436	0.00290436	0.178836	-0.0792816	0.436954	0.173718	Higher in SVN
milk_metabolome_34	rLC_neg_mtb_3613001	milk_metabolome_34__rLC_neg_mtb_3613001	Milk Metabolome	3-4 months	milk_metabolome	0.00288219	0.00288219	0.0405252	-0.218396	0.299446	0.758246	Higher in SVN	443.108	269	negative
maternal_prot_dep_56	Q6ZTR6	maternal_prot_dep_56__Q6ZTR6	Maternal Plasma Proteome (Depleted)	5-6 months	prot_dep	0.00283634	0.00283634	-0.146913	-0.405306	0.111481	0.264026	Lower in SVN
maternal_taxa_56	C941.sp004557565	maternal_taxa_56__C941.sp004557565	Maternal Fecal Microbiome (Taxa)	5-6 months	stool_microbiome_maternal	-0.00281571	0.00281571	-0.0301068	-0.289047	0.228834	0.819141	Lower in SVN
maternal_vams_56	vam_1000451	maternal_vams_56__vam_1000451	Maternal VAMS Metabolome (5-6m)	5-6 months	met_vams_maternal	0.00281073	0.00281073	0.238995	-0.018455	0.496445	0.0687106	Higher in SVN	120.066	0.04	positive	E177	C05519;C00188	L-Allo-threonine$L-Threonine
infant_gene_56	K00773	infant_gene_56__K00773	Infant Fecal Metagenome (Genes)	5-6 months	stool_gene_infant	-0.00276645	0.00276645	-0.196918	-0.454855	0.0610197	0.134025	Lower in SVN
maternal_prot_nav_56	Q96KN2	maternal_prot_nav_56__Q96KN2	Maternal Plasma Proteome (Naive)	5-6 months	prot_nav	-0.00276587	0.00276587	-0.28811	-0.544871	-0.0313492	0.0279961	Lower in SVN
milk_macro_micro_34	TMP	milk_macro_micro_34__TMP	Milk Macro- and Micronutrients	3-4 months	macro_micronutrients	0.00275332	0.00275332	0.0189924	-0.239962	0.277947	0.885314	Higher in SVN
maternal_vams_56	vam_2021254	maternal_vams_56__vam_2021254	Maternal VAMS Metabolome (5-6m)	5-6 months	met_vams_maternal	0.00273761	0.00273761	-0.0531873	-0.312077	0.205702	0.68623	Lower in SVN	616.226	408	negative
maternal_vams_56	vam_1000379	maternal_vams_56__vam_1000379	Maternal VAMS Metabolome (5-6m)	5-6 months	met_vams_maternal	-0.00270313	0.00270313	-0.0254668	-0.284414	0.23348	0.846639	Lower in SVN	116.107	23	positive	E302	C03087	5-Acetamidopentanoate
infant_vams_34	vam_1008355	infant_vams_34__vam_1008355	Infant VAMS Metabolome (3-4m)	3-4 months	met_vams_infant	0.00268326	0.00268326	-0.0355169	-0.294448	0.223414	0.787359	Lower in SVN	356.351	392	positive	E2021	stcrn	stearoylcarnitine
infant_gene_56	3002986	infant_gene_56__3002986	Infant Fecal Metagenome (Genes)	5-6 months	stool_gene_infant	-0.00266598	0.00266598	-0.166688	-0.424917	0.0915413	0.204916	Lower in SVN
infant_vams_34	vam_2031365	infant_vams_34__vam_2031365	Infant VAMS Metabolome (3-4m)	3-4 months	met_vams_infant	-0.00265436	0.00265436	-0.0916321	-0.350374	0.16711	0.486318	Lower in SVN	812.591	17	negative
maternal_gene_56	K18332	maternal_gene_56__K18332	Maternal Fecal Metagenome (Genes)	5-6 months	stool_gene_maternal	0.00264607	0.00264607	-0.0977867	-0.356498	0.160925	0.457493	Lower in SVN
maternal_vams_56	vam_2003266	maternal_vams_56__vam_2003266	Maternal VAMS Metabolome (5-6m)	5-6 months	met_vams_maternal	0.00264021	0.00264021	0.0306821	-0.228257	0.289622	0.815747	Higher in SVN	195.008	54	negative	E671	C16637;C00672;C00673	5-Deoxyribose-1-phosphate; 5-Deoxy-alpha-D-ribose-1-phosphate$2-Deoxy-D-ribose 1-phosphate$2-Deoxy-D-ribose 5-phosphate
maternal_vams_56	vam_1001722	maternal_vams_56__vam_1001722	Maternal VAMS Metabolome (5-6m)	5-6 months	met_vams_maternal	-0.00258324	0.00258324	-0.119797	-0.378382	0.138788	0.362591	Lower in SVN	169.123	83	positive	E319;E322	C02576;CE2061	Perillyl aldehyde; Perillaldehyde;
maternal_taxa_56	Unknown_UBA7642.2	maternal_taxa_56__Unknown_UBA7642.2	Maternal Fecal Microbiome (Taxa)	5-6 months	stool_microbiome_maternal	-0.00257429	0.00257429	-0.0234964	-0.282446	0.235453	0.858375	Lower in SVN
infant_vams_34	vam_2043748	infant_vams_34__vam_2043748	Infant VAMS Metabolome (3-4m)	3-4 months	met_vams_infant	-0.00256857	0.00256857	-0.0795784	-0.338375	0.179219	0.545488	Lower in SVN	1282.98	438	negative
maternal_taxa_56	Prevotella.sp900313215	maternal_taxa_56__Prevotella.sp900313215	Maternal Fecal Microbiome (Taxa)	5-6 months	stool_microbiome_maternal	-0.00256259	0.00256259	0.0729235	-0.1859	0.331747	0.579613	Higher in SVN
maternal_prot_nav_56	P15814	maternal_prot_nav_56__P15814	Maternal Plasma Proteome (Naive)	5-6 months	prot_nav	-0.0025596	0.0025596	-0.0243383	-0.283287	0.23461	0.853357	Lower in SVN
maternal_taxa_56	Prevotella.sp000436915	maternal_taxa_56__Prevotella.sp000436915	Maternal Fecal Microbiome (Taxa)	5-6 months	stool_microbiome_maternal	-0.00255839	0.00255839	-0.0207573	-0.27971	0.238196	0.87474	Lower in SVN
milk_macro_micro_34	Mo	milk_macro_micro_34__Mo	Milk Macro- and Micronutrients	3-4 months	macro_micronutrients	0.00255816	0.00255816	-0.0341374	-0.293071	0.224796	0.795432	Lower in SVN
infant_vams_34	vam_2009607	infant_vams_34__vam_2009607	Infant VAMS Metabolome (3-4m)	3-4 months	met_vams_infant	0.00255737	0.00255737	0.0643671	-0.194488	0.323222	0.624896	Higher in SVN	349.087	0.14	negative
milk_targeted_34	FA.18.1.	milk_targeted_34__FA.18.1.	Milk Targeted Metabolites	3-4 months	targeted_metabolites	0.0025422	0.0025422	0.0308657	-0.228074	0.289805	0.814664	Higher in SVN
maternal_vams_56	vam_1005450	maternal_vams_56__vam_1005450	Maternal VAMS Metabolome (5-6m)	5-6 months	met_vams_maternal	-0.00249359	0.00249359	0.0123036	-0.246657	0.271264	0.925556	Higher in SVN	284.33	404	positive
maternal_prot_nav_56	P04004	maternal_prot_nav_56__P04004	Maternal Plasma Proteome (Naive)	5-6 months	prot_nav	0.00243082	0.00243082	0.210149	-0.0476455	0.467943	0.1097	Higher in SVN
maternal_prot_nav_56	O14791	maternal_prot_nav_56__O14791	Maternal Plasma Proteome (Naive)	5-6 months	prot_nav	0.00241944	0.00241944	0.0499022	-0.208996	0.308801	0.704674	Higher in SVN
infant_gene_56	K02879	infant_gene_56__K02879	Infant Fecal Metagenome (Genes)	5-6 months	stool_gene_infant	-0.00240791	0.00240791	-0.191972	-0.449961	0.0660162	0.144114	Lower in SVN
maternal_prot_nav_56	P04070	maternal_prot_nav_56__P04070	Maternal Plasma Proteome (Naive)	5-6 months	prot_nav	-0.00238505	0.00238505	-0.0331135	-0.292049	0.225822	0.801438	Lower in SVN
maternal_vams_56	vam_1026067	maternal_vams_56__vam_1026067	Maternal VAMS Metabolome (5-6m)	5-6 months	met_vams_maternal	-0.00238189	0.00238189	0.211687	-0.0460902	0.469464	0.107114	Higher in SVN	717.96	602	positive
infant_vams_34	vam_2002069	infant_vams_34__vam_2002069	Infant VAMS Metabolome (3-4m)	3-4 months	met_vams_infant	0.00235171	0.00235171	-0.155256	-0.413582	0.10307	0.237798	Lower in SVN	165.001	619	negative
maternal_prot_dep_56	P23975	maternal_prot_dep_56__P23975	Maternal Plasma Proteome (Depleted)	5-6 months	prot_dep	-0.00232273	0.00232273	-0.277619	-0.534538	-0.0206998	0.0342873	Lower in SVN
maternal_vams_56	vam_1000217	maternal_vams_56__vam_1000217	Maternal VAMS Metabolome (5-6m)	5-6 months	met_vams_maternal	-0.00232247	0.00232247	0.267811	0.0107499	0.524873	0.0412173	Higher in SVN	104.108	513	positive
maternal_prot_dep_56	Q4G0P3	maternal_prot_dep_56__Q4G0P3	Maternal Plasma Proteome (Depleted)	5-6 months	prot_dep	-0.00231537	0.00231537	0.0227537	-0.236197	0.281704	0.862807	Higher in SVN
maternal_taxa_56	ER4.sp003522105	maternal_taxa_56__ER4.sp003522105	Maternal Fecal Microbiome (Taxa)	5-6 months	stool_microbiome_maternal	0.00231468	0.00231468	-0.208124	-0.465941	0.0496927	0.11318	Lower in SVN
infant_vams_34	vam_2009136	infant_vams_34__vam_2009136	Infant VAMS Metabolome (3-4m)	3-4 months	met_vams_infant	0.00229253	0.00229253	-0.0491784	-0.308079	0.209722	0.708762	Lower in SVN	339.04	396	negative
infant_vams_34	vam_2001399	infant_vams_34__vam_2001399	Infant VAMS Metabolome (3-4m)	3-4 months	met_vams_infant	-0.00228633	0.00228633	-0.138192	-0.396651	0.120267	0.293493	Lower in SVN	143.035	169	negative
maternal_vams_56	vam_1035630	maternal_vams_56__vam_1035630	Maternal VAMS Metabolome (5-6m)	5-6 months	met_vams_maternal	0.00228094	0.00228094	-0.0917357	-0.350478	0.167006	0.485825	Lower in SVN	887.563	535	positive
infant_vams_34	vam_2000371	infant_vams_34__vam_2000371	Infant VAMS Metabolome (3-4m)	3-4 months	met_vams_infant	-0.00225814	0.00225814	-0.0317795	-0.290717	0.227158	0.80928	Lower in SVN	106.017	69	negative
infant_gene_56	K03438	infant_gene_56__K03438	Infant Fecal Metagenome (Genes)	5-6 months	stool_gene_infant	-0.00225762	0.00225762	-0.220239	-0.477918	0.0374404	0.0935983	Lower in SVN
maternal_prot_nav_56	Q6PEZ8	maternal_prot_nav_56__Q6PEZ8	Maternal Plasma Proteome (Naive)	5-6 months	prot_nav	0.00224309	0.00224309	0.109963	-0.148682	0.368608	0.403378	Higher in SVN
maternal_gene_56	K03973	maternal_gene_56__K03973	Maternal Fecal Metagenome (Genes)	5-6 months	stool_gene_maternal	0.0021771	0.0021771	-0.101727	-0.360418	0.156964	0.439553	Lower in SVN
maternal_vams_56	vam_2039590	maternal_vams_56__vam_2039590	Maternal VAMS Metabolome (5-6m)	5-6 months	met_vams_maternal	0.00217155	0.00217155	0.167649	-0.0905712	0.42587	0.202308	Higher in SVN	1017.84	635	negative
maternal_prot_nav_56	P01344	maternal_prot_nav_56__P01344	Maternal Plasma Proteome (Naive)	5-6 months	prot_nav	0.00217097	0.00217097	0.28345	0.0266183	0.540282	0.0306565	Higher in SVN
maternal_prot_nav_56	P01859	maternal_prot_nav_56__P01859	Maternal Plasma Proteome (Naive)	5-6 months	prot_nav	-0.00216358	0.00216358	0.00563995	-0.253324	0.264604	0.965836	Higher in SVN
infant_gene_56	K02313	infant_gene_56__K02313	Infant Fecal Metagenome (Genes)	5-6 months	stool_gene_infant	-0.00214641	0.00214641	-0.198914	-0.45683	0.0590026	0.13011	Lower in SVN
maternal_gene_56	K01992	maternal_gene_56__K01992	Maternal Fecal Metagenome (Genes)	5-6 months	stool_gene_maternal	0.00213916	0.00213916	0.0546397	-0.204246	0.313525	0.678134	Higher in SVN
infant_vams_34	vam_1023554	infant_vams_34__vam_1023554	Infant VAMS Metabolome (3-4m)	3-4 months	met_vams_infant	0.00213484	0.00213484	-0.147769	-0.406155	0.110618	0.261247	Lower in SVN	677.556	433	positive
milk_hmo_34	2'FL_nmol/mL	milk_hmo_34__2'FL_nmol/mL	Milk HMOs	3-4 months	hmos	-0.00213115	0.00213115	-0.00331	-0.262274	0.255654	0.979946	Lower in SVN
milk_metabolome_34	rLC_neg_mtb_5744494	milk_metabolome_34__rLC_neg_mtb_5744494	Milk Metabolome	3-4 months	milk_metabolome	-0.00211306	0.00211306	0.143646	-0.114772	0.402065	0.274815	Higher in SVN	951.574	0.42	negative
milk_taxa_34	Limosilactobacillus.pontis	milk_taxa_34__Limosilactobacillus.pontis	Milk Microbiome (Taxa)	3-4 months	milk_microbiome	-0.00211229	0.00211229	0.043115	-0.2158	0.30203	0.743322	Higher in SVN
milk_metabolome_34	rLC_neg_mtb_6419311	milk_metabolome_34__rLC_neg_mtb_6419311	Milk Metabolome	3-4 months	milk_metabolome	0.00210958	0.00210958	0.0835567	-0.175223	0.342337	0.525573	Higher in SVN	565.388	469	negative
infant_gene_56	K01921	infant_gene_56__K01921	Infant Fecal Metagenome (Genes)	5-6 months	stool_gene_infant	-0.00209889	0.00209889	-0.180361	-0.438464	0.0777423	0.170067	Lower in SVN
maternal_prot_dep_56	Q76LX8	maternal_prot_dep_56__Q76LX8	Maternal Plasma Proteome (Depleted)	5-6 months	prot_dep	0.00209638	0.00209638	0.167365	-0.0908575	0.425588	0.203075	Higher in SVN
infant_vams_34	vam_1006489	infant_vams_34__vam_1006489	Infant VAMS Metabolome (3-4m)	3-4 months	met_vams_infant	0.0020925	0.0020925	0.0165708	-0.242386	0.275528	0.899855	Higher in SVN	311.081	342	positive
maternal_gene_56	K22717	maternal_gene_56__K22717	Maternal Fecal Metagenome (Genes)	5-6 months	stool_gene_maternal	0.00202891	0.00202891	-0.0407995	-0.29972	0.218121	0.756661	Lower in SVN
maternal_gene_56	K06333	maternal_gene_56__K06333	Maternal Fecal Metagenome (Genes)	5-6 months	stool_gene_maternal	-0.00202311	0.00202311	-0.0670261	-0.325872	0.19182	0.610661	Lower in SVN
infant_taxa_56	Unknown_LC.2	infant_taxa_56__Unknown_LC.2	Infant Fecal Microbiome (Taxa)	5-6 months	stool_microbiome_infant	0.00201789	0.00201789	-0.0757259	-0.334539	0.183087	0.565122	Lower in SVN
infant_taxa_56	Methanobrevibacter_A.smithii	infant_taxa_56__Methanobrevibacter_A.smithii	Infant Fecal Microbiome (Taxa)	5-6 months	stool_microbiome_infant	0.00201789	0.00201789	0.212934	-0.0448292	0.470697	0.105052	Higher in SVN
infant_taxa_56	Methanosphaera.stadtmanae	infant_taxa_56__Methanosphaera.stadtmanae	Infant Fecal Microbiome (Taxa)	5-6 months	stool_microbiome_infant	0.00201789	0.00201789	0.212934	-0.0448292	0.470697	0.105052	Higher in SVN
infant_taxa_56	MX.02.sp006954405	infant_taxa_56__MX.02.sp006954405	Infant Fecal Microbiome (Taxa)	5-6 months	stool_microbiome_infant	0.00201789	0.00201789	0.212934	-0.0448292	0.470697	0.105052	Higher in SVN
infant_taxa_56	Methanomethylophilus.alvus	infant_taxa_56__Methanomethylophilus.alvus	Infant Fecal Microbiome (Taxa)	5-6 months	stool_microbiome_infant	0.00201789	0.00201789	0.212934	-0.0448292	0.470697	0.105052	Higher in SVN
infant_taxa_56	UBA71.sp006954465	infant_taxa_56__UBA71.sp006954465	Infant Fecal Microbiome (Taxa)	5-6 months	stool_microbiome_infant	0.00201789	0.00201789	0.212934	-0.0448292	0.470697	0.105052	Higher in SVN
infant_taxa_56	Unknown_UBA71	infant_taxa_56__Unknown_UBA71	Infant Fecal Microbiome (Taxa)	5-6 months	stool_microbiome_infant	0.00201789	0.00201789	0.212934	-0.0448292	0.470697	0.105052	Higher in SVN
infant_taxa_56	Actinomyces.graevenitzii	infant_taxa_56__Actinomyces.graevenitzii	Infant Fecal Microbiome (Taxa)	5-6 months	stool_microbiome_infant	0.00201789	0.00201789	-0.138369	-0.396827	0.120089	0.292873	Lower in SVN
infant_taxa_56	Actinomyces.urogenitalis	infant_taxa_56__Actinomyces.urogenitalis	Infant Fecal Microbiome (Taxa)	5-6 months	stool_microbiome_infant	0.00201789	0.00201789	0.212934	-0.0448292	0.470697	0.105052	Higher in SVN
infant_taxa_56	Unknown_Arcanobacterium_A	infant_taxa_56__Unknown_Arcanobacterium_A	Infant Fecal Microbiome (Taxa)	5-6 months	stool_microbiome_infant	0.00201789	0.00201789	0.212934	-0.0448292	0.470697	0.105052	Higher in SVN
infant_taxa_56	Unknown_Arcanobacterium_A.1	infant_taxa_56__Unknown_Arcanobacterium_A.1	Infant Fecal Microbiome (Taxa)	5-6 months	stool_microbiome_infant	0.00201789	0.00201789	0.212934	-0.0448292	0.470697	0.105052	Higher in SVN
infant_taxa_56	Gleimia.europaea_A	infant_taxa_56__Gleimia.europaea_A	Infant Fecal Microbiome (Taxa)	5-6 months	stool_microbiome_infant	0.00201789	0.00201789	0.212934	-0.0448292	0.470697	0.105052	Higher in SVN
infant_taxa_56	Pauljensenia.sp001838165	infant_taxa_56__Pauljensenia.sp001838165	Infant Fecal Microbiome (Taxa)	5-6 months	stool_microbiome_infant	0.00201789	0.00201789	-0.0749045	-0.333721	0.183912	0.569351	Lower in SVN
infant_taxa_56	Pauljensenia.turicensis	infant_taxa_56__Pauljensenia.turicensis	Infant Fecal Microbiome (Taxa)	5-6 months	stool_microbiome_infant	0.00201789	0.00201789	0.212934	-0.0448292	0.470697	0.105052	Higher in SVN
infant_taxa_56	Alloscardovia.omnicolens	infant_taxa_56__Alloscardovia.omnicolens	Infant Fecal Microbiome (Taxa)	5-6 months	stool_microbiome_infant	0.00201789	0.00201789	0.212934	-0.0448292	0.470697	0.105052	Higher in SVN
infant_taxa_56	Bifidobacterium.adolescentis	infant_taxa_56__Bifidobacterium.adolescentis	Infant Fecal Microbiome (Taxa)	5-6 months	stool_microbiome_infant	0.00201789	0.00201789	0.212934	-0.0448292	0.470697	0.105052	Higher in SVN
infant_taxa_56	Bifidobacterium.dentium	infant_taxa_56__Bifidobacterium.dentium	Infant Fecal Microbiome (Taxa)	5-6 months	stool_microbiome_infant	0.00201789	0.00201789	0.212934	-0.0448292	0.470697	0.105052	Higher in SVN
infant_taxa_56	Bifidobacterium.pseudocatenulatum	infant_taxa_56__Bifidobacterium.pseudocatenulatum	Infant Fecal Microbiome (Taxa)	5-6 months	stool_microbiome_infant	0.00201789	0.00201789	0.212934	-0.0448292	0.470697	0.105052	Higher in SVN
infant_taxa_56	Bifidobacterium.sp002884815	infant_taxa_56__Bifidobacterium.sp002884815	Infant Fecal Microbiome (Taxa)	5-6 months	stool_microbiome_infant	0.00201789	0.00201789	0.212934	-0.0448292	0.470697	0.105052	Higher in SVN
infant_taxa_56	Bifidobacterium.vaginale	infant_taxa_56__Bifidobacterium.vaginale	Infant Fecal Microbiome (Taxa)	5-6 months	stool_microbiome_infant	0.00201789	0.00201789	0.212934	-0.0448292	0.470697	0.105052	Higher in SVN
infant_taxa_56	Bifidobacterium.vaginale_G	infant_taxa_56__Bifidobacterium.vaginale_G	Infant Fecal Microbiome (Taxa)	5-6 months	stool_microbiome_infant	0.00201789	0.00201789	0.212934	-0.0448292	0.470697	0.105052	Higher in SVN
infant_taxa_56	Rothia.mucilaginosa_A	infant_taxa_56__Rothia.mucilaginosa_A	Infant Fecal Microbiome (Taxa)	5-6 months	stool_microbiome_infant	0.00201789	0.00201789	0.212934	-0.0448292	0.470697	0.105052	Higher in SVN
infant_taxa_56	Cutibacterium.avidum	infant_taxa_56__Cutibacterium.avidum	Infant Fecal Microbiome (Taxa)	5-6 months	stool_microbiome_infant	0.00201789	0.00201789	0.212934	-0.0448292	0.470697	0.105052	Higher in SVN
infant_taxa_56	Fannyhessea.vaginae	infant_taxa_56__Fannyhessea.vaginae	Infant Fecal Microbiome (Taxa)	5-6 months	stool_microbiome_infant	0.00201789	0.00201789	0.212934	-0.0448292	0.470697	0.105052	Higher in SVN
infant_taxa_56	Lancefieldella.sp000564995	infant_taxa_56__Lancefieldella.sp000564995	Infant Fecal Microbiome (Taxa)	5-6 months	stool_microbiome_infant	0.00201789	0.00201789	0.212934	-0.0448292	0.470697	0.105052	Higher in SVN
infant_taxa_56	Lancefieldella.sp900555335	infant_taxa_56__Lancefieldella.sp900555335	Infant Fecal Microbiome (Taxa)	5-6 months	stool_microbiome_infant	0.00201789	0.00201789	0.212934	-0.0448292	0.470697	0.105052	Higher in SVN
infant_taxa_56	Unknown_Lancefieldella	infant_taxa_56__Unknown_Lancefieldella	Infant Fecal Microbiome (Taxa)	5-6 months	stool_microbiome_infant	0.00201789	0.00201789	0.212934	-0.0448292	0.470697	0.105052	Higher in SVN
infant_taxa_56	Unknown_Lancefieldella.1	infant_taxa_56__Unknown_Lancefieldella.1	Infant Fecal Microbiome (Taxa)	5-6 months	stool_microbiome_infant	0.00201789	0.00201789	0.212934	-0.0448292	0.470697	0.105052	Higher in SVN
infant_taxa_56	Olsenella_B.sp000752675	infant_taxa_56__Olsenella_B.sp000752675	Infant Fecal Microbiome (Taxa)	5-6 months	stool_microbiome_infant	0.00201789	0.00201789	0.212934	-0.0448292	0.470697	0.105052	Higher in SVN
infant_taxa_56	Olsenella_E.provencensis	infant_taxa_56__Olsenella_E.provencensis	Infant Fecal Microbiome (Taxa)	5-6 months	stool_microbiome_infant	0.00201789	0.00201789	-0.0759299	-0.334742	0.182882	0.564074	Lower in SVN
infant_taxa_56	Olsenella_E.sp003150175	infant_taxa_56__Olsenella_E.sp003150175	Infant Fecal Microbiome (Taxa)	5-6 months	stool_microbiome_infant	0.00201789	0.00201789	0.212934	-0.0448292	0.470697	0.105052	Higher in SVN
infant_taxa_56	Olsenella_E.sp003609875	infant_taxa_56__Olsenella_E.sp003609875	Infant Fecal Microbiome (Taxa)	5-6 months	stool_microbiome_infant	0.00201789	0.00201789	0.212934	-0.0448292	0.470697	0.105052	Higher in SVN
infant_taxa_56	Olsenella_E.sp900540955	infant_taxa_56__Olsenella_E.sp900540955	Infant Fecal Microbiome (Taxa)	5-6 months	stool_microbiome_infant	0.00201789	0.00201789	0.212934	-0.0448292	0.470697	0.105052	Higher in SVN
infant_taxa_56	Unknown_Olsenella_E	infant_taxa_56__Unknown_Olsenella_E	Infant Fecal Microbiome (Taxa)	5-6 months	stool_microbiome_infant	0.00201789	0.00201789	0.212934	-0.0448292	0.470697	0.105052	Higher in SVN
infant_taxa_56	Parolsenella.massiliensis	infant_taxa_56__Parolsenella.massiliensis	Infant Fecal Microbiome (Taxa)	5-6 months	stool_microbiome_infant	0.00201789	0.00201789	0.212934	-0.0448292	0.470697	0.105052	Higher in SVN
infant_taxa_56	Parolsenella.sp900544655	infant_taxa_56__Parolsenella.sp900544655	Infant Fecal Microbiome (Taxa)	5-6 months	stool_microbiome_infant	0.00201789	0.00201789	0.212934	-0.0448292	0.470697	0.105052	Higher in SVN
infant_taxa_56	Parolsenella.sp900552935	infant_taxa_56__Parolsenella.sp900552935	Infant Fecal Microbiome (Taxa)	5-6 months	stool_microbiome_infant	0.00201789	0.00201789	0.212934	-0.0448292	0.470697	0.105052	Higher in SVN
infant_taxa_56	Unknown_Atopobiaceae	infant_taxa_56__Unknown_Atopobiaceae	Infant Fecal Microbiome (Taxa)	5-6 months	stool_microbiome_infant	0.00201789	0.00201789	0.212934	-0.0448292	0.470697	0.105052	Higher in SVN
infant_taxa_56	Collinsella.bouchesdurhonensis	infant_taxa_56__Collinsella.bouchesdurhonensis	Infant Fecal Microbiome (Taxa)	5-6 months	stool_microbiome_infant	0.00201789	0.00201789	0.212934	-0.0448292	0.470697	0.105052	Higher in SVN
infant_taxa_56	Unknown_Collinsella	infant_taxa_56__Unknown_Collinsella	Infant Fecal Microbiome (Taxa)	5-6 months	stool_microbiome_infant	0.00201789	0.00201789	0.212934	-0.0448292	0.470697	0.105052	Higher in SVN
infant_taxa_56	Unknown_Collinsella.2	infant_taxa_56__Unknown_Collinsella.2	Infant Fecal Microbiome (Taxa)	5-6 months	stool_microbiome_infant	0.00201789	0.00201789	0.212934	-0.0448292	0.470697	0.105052	Higher in SVN
infant_taxa_56	Unknown_Collinsella.3	infant_taxa_56__Unknown_Collinsella.3	Infant Fecal Microbiome (Taxa)	5-6 months	stool_microbiome_infant	0.00201789	0.00201789	0.212934	-0.0448292	0.470697	0.105052	Higher in SVN
infant_taxa_56	Unknown_Collinsella.4	infant_taxa_56__Unknown_Collinsella.4	Infant Fecal Microbiome (Taxa)	5-6 months	stool_microbiome_infant	0.00201789	0.00201789	0.212934	-0.0448292	0.470697	0.105052	Higher in SVN
infant_taxa_56	Unknown_Collinsella.5	infant_taxa_56__Unknown_Collinsella.5	Infant Fecal Microbiome (Taxa)	5-6 months	stool_microbiome_infant	0.00201789	0.00201789	0.212934	-0.0448292	0.470697	0.105052	Higher in SVN
infant_taxa_56	Unknown_Collinsella.6	infant_taxa_56__Unknown_Collinsella.6	Infant Fecal Microbiome (Taxa)	5-6 months	stool_microbiome_infant	0.00201789	0.00201789	0.212934	-0.0448292	0.470697	0.105052	Higher in SVN
infant_taxa_56	Unknown_Collinsella.7	infant_taxa_56__Unknown_Collinsella.7	Infant Fecal Microbiome (Taxa)	5-6 months	stool_microbiome_infant	0.00201789	0.00201789	0.212934	-0.0448292	0.470697	0.105052	Higher in SVN
infant_taxa_56	Unknown_Collinsella.8	infant_taxa_56__Unknown_Collinsella.8	Infant Fecal Microbiome (Taxa)	5-6 months	stool_microbiome_infant	0.00201789	0.00201789	0.212934	-0.0448292	0.470697	0.105052	Higher in SVN
infant_taxa_56	Unknown_Collinsella.9	infant_taxa_56__Unknown_Collinsella.9	Infant Fecal Microbiome (Taxa)	5-6 months	stool_microbiome_infant	0.00201789	0.00201789	0.212934	-0.0448292	0.470697	0.105052	Higher in SVN
infant_taxa_56	Enorma.sp900538305	infant_taxa_56__Enorma.sp900538305	Infant Fecal Microbiome (Taxa)	5-6 months	stool_microbiome_infant	0.00201789	0.00201789	0.212934	-0.0448292	0.470697	0.105052	Higher in SVN
infant_taxa_56	Unknown_Enorma	infant_taxa_56__Unknown_Enorma	Infant Fecal Microbiome (Taxa)	5-6 months	stool_microbiome_infant	0.00201789	0.00201789	0.212934	-0.0448292	0.470697	0.105052	Higher in SVN
infant_taxa_56	CAG.1427.sp000434775	infant_taxa_56__CAG.1427.sp000434775	Infant Fecal Microbiome (Taxa)	5-6 months	stool_microbiome_infant	0.00201789	0.00201789	0.212934	-0.0448292	0.470697	0.105052	Higher in SVN
infant_taxa_56	CAG.1427.sp000435475	infant_taxa_56__CAG.1427.sp000435475	Infant Fecal Microbiome (Taxa)	5-6 months	stool_microbiome_infant	0.00201789	0.00201789	0.212934	-0.0448292	0.470697	0.105052	Higher in SVN
infant_taxa_56	CAG.1427.sp000435675	infant_taxa_56__CAG.1427.sp000435675	Infant Fecal Microbiome (Taxa)	5-6 months	stool_microbiome_infant	0.00201789	0.00201789	0.212934	-0.0448292	0.470697	0.105052	Higher in SVN
infant_taxa_56	CAG.1427.sp000436075	infant_taxa_56__CAG.1427.sp000436075	Infant Fecal Microbiome (Taxa)	5-6 months	stool_microbiome_infant	0.00201789	0.00201789	0.212934	-0.0448292	0.470697	0.105052	Higher in SVN
infant_taxa_56	CAG.1427.sp900553605	infant_taxa_56__CAG.1427.sp900553605	Infant Fecal Microbiome (Taxa)	5-6 months	stool_microbiome_infant	0.00201789	0.00201789	0.212934	-0.0448292	0.470697	0.105052	Higher in SVN
infant_taxa_56	Unknown_CAG.1427	infant_taxa_56__Unknown_CAG.1427	Infant Fecal Microbiome (Taxa)	5-6 months	stool_microbiome_infant	0.00201789	0.00201789	0.212934	-0.0448292	0.470697	0.105052	Higher in SVN
infant_taxa_56	DNF00809.sp001552935	infant_taxa_56__DNF00809.sp001552935	Infant Fecal Microbiome (Taxa)	5-6 months	stool_microbiome_infant	0.00201789	0.00201789	0.212934	-0.0448292	0.470697	0.105052	Higher in SVN
infant_taxa_56	Gordonibacter.pamelaeae	infant_taxa_56__Gordonibacter.pamelaeae	Infant Fecal Microbiome (Taxa)	5-6 months	stool_microbiome_infant	0.00201789	0.00201789	0.212934	-0.0448292	0.470697	0.105052	Higher in SVN
infant_taxa_56	Gordonibacter.pamelaeae.1	infant_taxa_56__Gordonibacter.pamelaeae.1	Infant Fecal Microbiome (Taxa)	5-6 months	stool_microbiome_infant	0.00201789	0.00201789	0.212934	-0.0448292	0.470697	0.105052	Higher in SVN
infant_taxa_56	Phoenicibacter.congonensis	infant_taxa_56__Phoenicibacter.congonensis	Infant Fecal Microbiome (Taxa)	5-6 months	stool_microbiome_infant	0.00201789	0.00201789	0.212934	-0.0448292	0.470697	0.105052	Higher in SVN
infant_taxa_56	Senegalimassilia.sp004135645	infant_taxa_56__Senegalimassilia.sp004135645	Infant Fecal Microbiome (Taxa)	5-6 months	stool_microbiome_infant	0.00201789	0.00201789	0.212934	-0.0448292	0.470697	0.105052	Higher in SVN
infant_taxa_56	Senegalimassilia.sp900550055	infant_taxa_56__Senegalimassilia.sp900550055	Infant Fecal Microbiome (Taxa)	5-6 months	stool_microbiome_infant	0.00201789	0.00201789	0.212934	-0.0448292	0.470697	0.105052	Higher in SVN
infant_taxa_56	Unknown_Senegalimassilia	infant_taxa_56__Unknown_Senegalimassilia	Infant Fecal Microbiome (Taxa)	5-6 months	stool_microbiome_infant	0.00201789	0.00201789	0.212934	-0.0448292	0.470697	0.105052	Higher in SVN
infant_taxa_56	Unknown_Senegalimassilia.1	infant_taxa_56__Unknown_Senegalimassilia.1	Infant Fecal Microbiome (Taxa)	5-6 months	stool_microbiome_infant	0.00201789	0.00201789	0.212934	-0.0448292	0.470697	0.105052	Higher in SVN
infant_taxa_56	Unknown_Senegalimassilia.2	infant_taxa_56__Unknown_Senegalimassilia.2	Infant Fecal Microbiome (Taxa)	5-6 months	stool_microbiome_infant	0.00201789	0.00201789	0.212934	-0.0448292	0.470697	0.105052	Higher in SVN
infant_taxa_56	Unknown_Senegalimassilia.3	infant_taxa_56__Unknown_Senegalimassilia.3	Infant Fecal Microbiome (Taxa)	5-6 months	stool_microbiome_infant	0.00201789	0.00201789	0.212934	-0.0448292	0.470697	0.105052	Higher in SVN
infant_taxa_56	Slackia.exigua	infant_taxa_56__Slackia.exigua	Infant Fecal Microbiome (Taxa)	5-6 months	stool_microbiome_infant	0.00201789	0.00201789	0.212934	-0.0448292	0.470697	0.105052	Higher in SVN
infant_taxa_56	Slackia_A.isoflavoniconvertens	infant_taxa_56__Slackia_A.isoflavoniconvertens	Infant Fecal Microbiome (Taxa)	5-6 months	stool_microbiome_infant	0.00201789	0.00201789	0.212934	-0.0448292	0.470697	0.105052	Higher in SVN
infant_taxa_56	Unknown_Slackia_A	infant_taxa_56__Unknown_Slackia_A	Infant Fecal Microbiome (Taxa)	5-6 months	stool_microbiome_infant	0.00201789	0.00201789	0.212934	-0.0448292	0.470697	0.105052	Higher in SVN
infant_taxa_56	Unknown_Slackia_A.1	infant_taxa_56__Unknown_Slackia_A.1	Infant Fecal Microbiome (Taxa)	5-6 months	stool_microbiome_infant	0.00201789	0.00201789	0.212934	-0.0448292	0.470697	0.105052	Higher in SVN
infant_taxa_56	Unknown_Slackia_A.2	infant_taxa_56__Unknown_Slackia_A.2	Infant Fecal Microbiome (Taxa)	5-6 months	stool_microbiome_infant	0.00201789	0.00201789	0.212934	-0.0448292	0.470697	0.105052	Higher in SVN
infant_taxa_56	UMGS1293.sp900550385	infant_taxa_56__UMGS1293.sp900550385	Infant Fecal Microbiome (Taxa)	5-6 months	stool_microbiome_infant	0.00201789	0.00201789	0.212934	-0.0448292	0.470697	0.105052	Higher in SVN
infant_taxa_56	Unknown_UMGS1293	infant_taxa_56__Unknown_UMGS1293	Infant Fecal Microbiome (Taxa)	5-6 months	stool_microbiome_infant	0.00201789	0.00201789	0.212934	-0.0448292	0.470697	0.105052	Higher in SVN
infant_taxa_56	Unknown_UMGS1502	infant_taxa_56__Unknown_UMGS1502	Infant Fecal Microbiome (Taxa)	5-6 months	stool_microbiome_infant	0.00201789	0.00201789	0.212934	-0.0448292	0.470697	0.105052	Higher in SVN
infant_taxa_56	Unknown_UMGS1502.1	infant_taxa_56__Unknown_UMGS1502.1	Infant Fecal Microbiome (Taxa)	5-6 months	stool_microbiome_infant	0.00201789	0.00201789	0.212934	-0.0448292	0.470697	0.105052	Higher in SVN
infant_taxa_56	UMGS1773.sp900554945	infant_taxa_56__UMGS1773.sp900554945	Infant Fecal Microbiome (Taxa)	5-6 months	stool_microbiome_infant	0.00201789	0.00201789	0.212934	-0.0448292	0.470697	0.105052	Higher in SVN
infant_taxa_56	Unknown_Eggerthellaceae	infant_taxa_56__Unknown_Eggerthellaceae	Infant Fecal Microbiome (Taxa)	5-6 months	stool_microbiome_infant	0.00201789	0.00201789	0.212934	-0.0448292	0.470697	0.105052	Higher in SVN
infant_taxa_56	Unknown_QAMH01	infant_taxa_56__Unknown_QAMH01	Infant Fecal Microbiome (Taxa)	5-6 months	stool_microbiome_infant	0.00201789	0.00201789	0.212934	-0.0448292	0.470697	0.105052	Higher in SVN
infant_taxa_56	Unknown_QAMH01.1	infant_taxa_56__Unknown_QAMH01.1	Infant Fecal Microbiome (Taxa)	5-6 months	stool_microbiome_infant	0.00201789	0.00201789	0.212934	-0.0448292	0.470697	0.105052	Higher in SVN
infant_taxa_56	Unknown_W2P13.069	infant_taxa_56__Unknown_W2P13.069	Infant Fecal Microbiome (Taxa)	5-6 months	stool_microbiome_infant	0.00201789	0.00201789	0.212934	-0.0448292	0.470697	0.105052	Higher in SVN
infant_taxa_56	UMGS124.sp900539345	infant_taxa_56__UMGS124.sp900539345	Infant Fecal Microbiome (Taxa)	5-6 months	stool_microbiome_infant	0.00201789	0.00201789	0.212934	-0.0448292	0.470697	0.105052	Higher in SVN
infant_taxa_56	Unknown_UMGS124	infant_taxa_56__Unknown_UMGS124	Infant Fecal Microbiome (Taxa)	5-6 months	stool_microbiome_infant	0.00201789	0.00201789	0.212934	-0.0448292	0.470697	0.105052	Higher in SVN
infant_taxa_56	Bacteroides.bouchesdurhonensis	infant_taxa_56__Bacteroides.bouchesdurhonensis	Infant Fecal Microbiome (Taxa)	5-6 months	stool_microbiome_infant	0.00201789	0.00201789	0.212934	-0.0448292	0.470697	0.105052	Higher in SVN
infant_taxa_56	Bacteroides.caccae	infant_taxa_56__Bacteroides.caccae	Infant Fecal Microbiome (Taxa)	5-6 months	stool_microbiome_infant	0.00201789	0.00201789	-0.199493	-0.457404	0.0584168	0.12899	Lower in SVN
infant_taxa_56	Bacteroides.cellulosilyticus	infant_taxa_56__Bacteroides.cellulosilyticus	Infant Fecal Microbiome (Taxa)	5-6 months	stool_microbiome_infant	0.00201789	0.00201789	0.212934	-0.0448292	0.470697	0.105052	Higher in SVN
infant_taxa_56	Bacteroides.clarus	infant_taxa_56__Bacteroides.clarus	Infant Fecal Microbiome (Taxa)	5-6 months	stool_microbiome_infant	0.00201789	0.00201789	0.212934	-0.0448292	0.470697	0.105052	Higher in SVN
infant_taxa_56	Bacteroides.congonensis	infant_taxa_56__Bacteroides.congonensis	Infant Fecal Microbiome (Taxa)	5-6 months	stool_microbiome_infant	0.00201789	0.00201789	0.212934	-0.0448292	0.470697	0.105052	Higher in SVN
infant_taxa_56	Bacteroides.eggerthii	infant_taxa_56__Bacteroides.eggerthii	Infant Fecal Microbiome (Taxa)	5-6 months	stool_microbiome_infant	0.00201789	0.00201789	0.212934	-0.0448292	0.470697	0.105052	Higher in SVN
infant_taxa_56	Bacteroides.finegoldii	infant_taxa_56__Bacteroides.finegoldii	Infant Fecal Microbiome (Taxa)	5-6 months	stool_microbiome_infant	0.00201789	0.00201789	0.212934	-0.0448292	0.470697	0.105052	Higher in SVN
infant_taxa_56	Bacteroides.intestinalis	infant_taxa_56__Bacteroides.intestinalis	Infant Fecal Microbiome (Taxa)	5-6 months	stool_microbiome_infant	0.00201789	0.00201789	0.212934	-0.0448292	0.470697	0.105052	Higher in SVN
infant_taxa_56	Bacteroides.salyersiae	infant_taxa_56__Bacteroides.salyersiae	Infant Fecal Microbiome (Taxa)	5-6 months	stool_microbiome_infant	0.00201789	0.00201789	0.212934	-0.0448292	0.470697	0.105052	Higher in SVN
infant_taxa_56	Bacteroides.stercoris	infant_taxa_56__Bacteroides.stercoris	Infant Fecal Microbiome (Taxa)	5-6 months	stool_microbiome_infant	0.00201789	0.00201789	0.215745	-0.0419863	0.473476	0.10052	Higher in SVN
infant_taxa_56	Unknown_Bacteroides	infant_taxa_56__Unknown_Bacteroides	Infant Fecal Microbiome (Taxa)	5-6 months	stool_microbiome_infant	0.00201789	0.00201789	0.212934	-0.0448292	0.470697	0.105052	Higher in SVN
infant_taxa_56	Unknown_Bacteroides.1	infant_taxa_56__Unknown_Bacteroides.1	Infant Fecal Microbiome (Taxa)	5-6 months	stool_microbiome_infant	0.00201789	0.00201789	0.212934	-0.0448292	0.470697	0.105052	Higher in SVN
infant_taxa_56	Unknown_Bacteroides.2	infant_taxa_56__Unknown_Bacteroides.2	Infant Fecal Microbiome (Taxa)	5-6 months	stool_microbiome_infant	0.00201789	0.00201789	0.212934	-0.0448292	0.470697	0.105052	Higher in SVN
infant_taxa_56	Unknown_CAG.462	infant_taxa_56__Unknown_CAG.462	Infant Fecal Microbiome (Taxa)	5-6 months	stool_microbiome_infant	0.00201789	0.00201789	0.212934	-0.0448292	0.470697	0.105052	Higher in SVN
infant_taxa_56	Unknown_OM05.12	infant_taxa_56__Unknown_OM05.12	Infant Fecal Microbiome (Taxa)	5-6 months	stool_microbiome_infant	0.00201789	0.00201789	0.212934	-0.0448292	0.470697	0.105052	Higher in SVN
infant_taxa_56	Paraprevotella.clara	infant_taxa_56__Paraprevotella.clara	Infant Fecal Microbiome (Taxa)	5-6 months	stool_microbiome_infant	0.00201789	0.00201789	0.212934	-0.0448292	0.470697	0.105052	Higher in SVN
infant_taxa_56	Unknown_Paraprevotella	infant_taxa_56__Unknown_Paraprevotella	Infant Fecal Microbiome (Taxa)	5-6 months	stool_microbiome_infant	0.00201789	0.00201789	0.212934	-0.0448292	0.470697	0.105052	Higher in SVN
infant_taxa_56	Phocaeicola.coprocola	infant_taxa_56__Phocaeicola.coprocola	Infant Fecal Microbiome (Taxa)	5-6 months	stool_microbiome_infant	0.00201789	0.00201789	0.212934	-0.0448292	0.470697	0.105052	Higher in SVN
infant_taxa_56	Phocaeicola.massiliensis	infant_taxa_56__Phocaeicola.massiliensis	Infant Fecal Microbiome (Taxa)	5-6 months	stool_microbiome_infant	0.00201789	0.00201789	0.212934	-0.0448292	0.470697	0.105052	Higher in SVN
infant_taxa_56	Phocaeicola.sartorii	infant_taxa_56__Phocaeicola.sartorii	Infant Fecal Microbiome (Taxa)	5-6 months	stool_microbiome_infant	0.00201789	0.00201789	0.212934	-0.0448292	0.470697	0.105052	Higher in SVN
infant_taxa_56	Phocaeicola.sp000434735	infant_taxa_56__Phocaeicola.sp000434735	Infant Fecal Microbiome (Taxa)	5-6 months	stool_microbiome_infant	0.00201789	0.00201789	0.212934	-0.0448292	0.470697	0.105052	Higher in SVN
infant_taxa_56	Phocaeicola.sp002493165	infant_taxa_56__Phocaeicola.sp002493165	Infant Fecal Microbiome (Taxa)	5-6 months	stool_microbiome_infant	0.00201789	0.00201789	0.212934	-0.0448292	0.470697	0.105052	Higher in SVN
infant_taxa_56	Prevotella.amnii	infant_taxa_56__Prevotella.amnii	Infant Fecal Microbiome (Taxa)	5-6 months	stool_microbiome_infant	0.00201789	0.00201789	0.212934	-0.0448292	0.470697	0.105052	Higher in SVN
infant_taxa_56	Prevotella.bivia	infant_taxa_56__Prevotella.bivia	Infant Fecal Microbiome (Taxa)	5-6 months	stool_microbiome_infant	0.00201789	0.00201789	0.212934	-0.0448292	0.470697	0.105052	Higher in SVN
infant_taxa_56	Prevotella.buccalis	infant_taxa_56__Prevotella.buccalis	Infant Fecal Microbiome (Taxa)	5-6 months	stool_microbiome_infant	0.00201789	0.00201789	0.212934	-0.0448292	0.470697	0.105052	Higher in SVN
infant_taxa_56	Prevotella.colorans	infant_taxa_56__Prevotella.colorans	Infant Fecal Microbiome (Taxa)	5-6 months	stool_microbiome_infant	0.00201789	0.00201789	0.212934	-0.0448292	0.470697	0.105052	Higher in SVN
infant_taxa_56	Prevotella.corporis	infant_taxa_56__Prevotella.corporis	Infant Fecal Microbiome (Taxa)	5-6 months	stool_microbiome_infant	0.00201789	0.00201789	0.212934	-0.0448292	0.470697	0.105052	Higher in SVN
infant_taxa_56	Prevotella.disiens	infant_taxa_56__Prevotella.disiens	Infant Fecal Microbiome (Taxa)	5-6 months	stool_microbiome_infant	0.00201789	0.00201789	0.212934	-0.0448292	0.470697	0.105052	Higher in SVN
infant_taxa_56	Prevotella.melaninogenica	infant_taxa_56__Prevotella.melaninogenica	Infant Fecal Microbiome (Taxa)	5-6 months	stool_microbiome_infant	0.00201789	0.00201789	0.212934	-0.0448292	0.470697	0.105052	Higher in SVN
infant_taxa_56	Prevotella.sp000434975	infant_taxa_56__Prevotella.sp000434975	Infant Fecal Microbiome (Taxa)	5-6 months	stool_microbiome_infant	0.00201789	0.00201789	0.212934	-0.0448292	0.470697	0.105052	Higher in SVN
infant_taxa_56	Prevotella.sp000436035	infant_taxa_56__Prevotella.sp000436035	Infant Fecal Microbiome (Taxa)	5-6 months	stool_microbiome_infant	0.00201789	0.00201789	0.212934	-0.0448292	0.470697	0.105052	Higher in SVN
infant_taxa_56	Prevotella.sp000436915	infant_taxa_56__Prevotella.sp000436915	Infant Fecal Microbiome (Taxa)	5-6 months	stool_microbiome_infant	0.00201789	0.00201789	0.212934	-0.0448292	0.470697	0.105052	Higher in SVN
infant_taxa_56	Prevotella.sp000834015	infant_taxa_56__Prevotella.sp000834015	Infant Fecal Microbiome (Taxa)	5-6 months	stool_microbiome_infant	0.00201789	0.00201789	0.212934	-0.0448292	0.470697	0.105052	Higher in SVN
infant_taxa_56	Prevotella.sp002251295	infant_taxa_56__Prevotella.sp002251295	Infant Fecal Microbiome (Taxa)	5-6 months	stool_microbiome_infant	0.00201789	0.00201789	0.212934	-0.0448292	0.470697	0.105052	Higher in SVN
infant_taxa_56	Prevotella.sp002251385	infant_taxa_56__Prevotella.sp002251385	Infant Fecal Microbiome (Taxa)	5-6 months	stool_microbiome_infant	0.00201789	0.00201789	0.212934	-0.0448292	0.470697	0.105052	Higher in SVN
infant_taxa_56	Prevotella.sp002300055	infant_taxa_56__Prevotella.sp002300055	Infant Fecal Microbiome (Taxa)	5-6 months	stool_microbiome_infant	0.00201789	0.00201789	0.212934	-0.0448292	0.470697	0.105052	Higher in SVN
infant_taxa_56	Prevotella.sp003447235	infant_taxa_56__Prevotella.sp003447235	Infant Fecal Microbiome (Taxa)	5-6 months	stool_microbiome_infant	0.00201789	0.00201789	0.212934	-0.0448292	0.470697	0.105052	Higher in SVN
infant_taxa_56	Prevotella.sp900313215	infant_taxa_56__Prevotella.sp900313215	Infant Fecal Microbiome (Taxa)	5-6 months	stool_microbiome_infant	0.00201789	0.00201789	0.212934	-0.0448292	0.470697	0.105052	Higher in SVN
infant_taxa_56	Prevotella.sp900540415	infant_taxa_56__Prevotella.sp900540415	Infant Fecal Microbiome (Taxa)	5-6 months	stool_microbiome_infant	0.00201789	0.00201789	0.212934	-0.0448292	0.470697	0.105052	Higher in SVN
infant_taxa_56	Prevotella.sp900543975	infant_taxa_56__Prevotella.sp900543975	Infant Fecal Microbiome (Taxa)	5-6 months	stool_microbiome_infant	0.00201789	0.00201789	-0.0777867	-0.336591	0.181018	0.554577	Lower in SVN
infant_taxa_56	Prevotella.sp900544495	infant_taxa_56__Prevotella.sp900544495	Infant Fecal Microbiome (Taxa)	5-6 months	stool_microbiome_infant	0.00201789	0.00201789	-0.0775736	-0.336379	0.181232	0.555663	Lower in SVN
infant_taxa_56	Prevotella.sp900546535	infant_taxa_56__Prevotella.sp900546535	Infant Fecal Microbiome (Taxa)	5-6 months	stool_microbiome_infant	0.00201789	0.00201789	0.212934	-0.0448292	0.470697	0.105052	Higher in SVN
infant_taxa_56	Prevotella.sp900546575	infant_taxa_56__Prevotella.sp900546575	Infant Fecal Microbiome (Taxa)	5-6 months	stool_microbiome_infant	0.00201789	0.00201789	0.0708291	-0.188003	0.329661	0.590555	Higher in SVN
infant_taxa_56	Prevotella.sp900548535	infant_taxa_56__Prevotella.sp900548535	Infant Fecal Microbiome (Taxa)	5-6 months	stool_microbiome_infant	0.00201789	0.00201789	0.212934	-0.0448292	0.470697	0.105052	Higher in SVN
infant_taxa_56	Prevotella.sp900548585	infant_taxa_56__Prevotella.sp900548585	Infant Fecal Microbiome (Taxa)	5-6 months	stool_microbiome_infant	0.00201789	0.00201789	0.212934	-0.0448292	0.470697	0.105052	Higher in SVN
infant_taxa_56	Prevotella.sp900548745	infant_taxa_56__Prevotella.sp900548745	Infant Fecal Microbiome (Taxa)	5-6 months	stool_microbiome_infant	0.00201789	0.00201789	0.212934	-0.0448292	0.470697	0.105052	Higher in SVN
infant_taxa_56	Prevotella.sp900550035	infant_taxa_56__Prevotella.sp900550035	Infant Fecal Microbiome (Taxa)	5-6 months	stool_microbiome_infant	0.00201789	0.00201789	0.212934	-0.0448292	0.470697	0.105052	Higher in SVN
infant_taxa_56	Prevotella.sp900552515	infant_taxa_56__Prevotella.sp900552515	Infant Fecal Microbiome (Taxa)	5-6 months	stool_microbiome_infant	0.00201789	0.00201789	0.212934	-0.0448292	0.470697	0.105052	Higher in SVN
infant_taxa_56	Prevotella.sp900552675	infant_taxa_56__Prevotella.sp900552675	Infant Fecal Microbiome (Taxa)	5-6 months	stool_microbiome_infant	0.00201789	0.00201789	0.212934	-0.0448292	0.470697	0.105052	Higher in SVN
infant_taxa_56	Prevotella.sp900552965	infant_taxa_56__Prevotella.sp900552965	Infant Fecal Microbiome (Taxa)	5-6 months	stool_microbiome_infant	0.00201789	0.00201789	0.212934	-0.0448292	0.470697	0.105052	Higher in SVN
infant_taxa_56	Prevotella.sp900553155	infant_taxa_56__Prevotella.sp900553155	Infant Fecal Microbiome (Taxa)	5-6 months	stool_microbiome_infant	0.00201789	0.00201789	0.212934	-0.0448292	0.470697	0.105052	Higher in SVN
infant_taxa_56	Prevotella.sp900553595	infant_taxa_56__Prevotella.sp900553595	Infant Fecal Microbiome (Taxa)	5-6 months	stool_microbiome_infant	0.00201789	0.00201789	0.212934	-0.0448292	0.470697	0.105052	Higher in SVN
infant_taxa_56	Prevotella.sp900556395	infant_taxa_56__Prevotella.sp900556395	Infant Fecal Microbiome (Taxa)	5-6 months	stool_microbiome_infant	0.00201789	0.00201789	0.212934	-0.0448292	0.470697	0.105052	Higher in SVN
infant_taxa_56	Prevotella.sp900556795	infant_taxa_56__Prevotella.sp900556795	Infant Fecal Microbiome (Taxa)	5-6 months	stool_microbiome_infant	0.00201789	0.00201789	0.212934	-0.0448292	0.470697	0.105052	Higher in SVN
infant_taxa_56	Prevotella.sp900556825	infant_taxa_56__Prevotella.sp900556825	Infant Fecal Microbiome (Taxa)	5-6 months	stool_microbiome_infant	0.00201789	0.00201789	0.212934	-0.0448292	0.470697	0.105052	Higher in SVN
infant_taxa_56	Prevotella.sp900557405	infant_taxa_56__Prevotella.sp900557405	Infant Fecal Microbiome (Taxa)	5-6 months	stool_microbiome_infant	0.00201789	0.00201789	0.212934	-0.0448292	0.470697	0.105052	Higher in SVN
infant_taxa_56	Prevotella.stercorea	infant_taxa_56__Prevotella.stercorea	Infant Fecal Microbiome (Taxa)	5-6 months	stool_microbiome_infant	0.00201789	0.00201789	0.212934	-0.0448292	0.470697	0.105052	Higher in SVN
infant_taxa_56	Prevotella.timonensis	infant_taxa_56__Prevotella.timonensis	Infant Fecal Microbiome (Taxa)	5-6 months	stool_microbiome_infant	0.00201789	0.00201789	0.212934	-0.0448292	0.470697	0.105052	Higher in SVN
infant_taxa_56	Unknown_Prevotella	infant_taxa_56__Unknown_Prevotella	Infant Fecal Microbiome (Taxa)	5-6 months	stool_microbiome_infant	0.00201789	0.00201789	0.212934	-0.0448292	0.470697	0.105052	Higher in SVN
infant_taxa_56	Unknown_Prevotella.1	infant_taxa_56__Unknown_Prevotella.1	Infant Fecal Microbiome (Taxa)	5-6 months	stool_microbiome_infant	0.00201789	0.00201789	0.212934	-0.0448292	0.470697	0.105052	Higher in SVN
infant_taxa_56	Unknown_Prevotella.2	infant_taxa_56__Unknown_Prevotella.2	Infant Fecal Microbiome (Taxa)	5-6 months	stool_microbiome_infant	0.00201789	0.00201789	0.212934	-0.0448292	0.470697	0.105052	Higher in SVN
infant_taxa_56	Unknown_Prevotella.3	infant_taxa_56__Unknown_Prevotella.3	Infant Fecal Microbiome (Taxa)	5-6 months	stool_microbiome_infant	0.00201789	0.00201789	0.212934	-0.0448292	0.470697	0.105052	Higher in SVN
infant_taxa_56	Unknown_Prevotella.4	infant_taxa_56__Unknown_Prevotella.4	Infant Fecal Microbiome (Taxa)	5-6 months	stool_microbiome_infant	0.00201789	0.00201789	0.212934	-0.0448292	0.470697	0.105052	Higher in SVN
infant_taxa_56	Unknown_Prevotella.5	infant_taxa_56__Unknown_Prevotella.5	Infant Fecal Microbiome (Taxa)	5-6 months	stool_microbiome_infant	0.00201789	0.00201789	0.212934	-0.0448292	0.470697	0.105052	Higher in SVN
infant_taxa_56	Unknown_Prevotella.6	infant_taxa_56__Unknown_Prevotella.6	Infant Fecal Microbiome (Taxa)	5-6 months	stool_microbiome_infant	0.00201789	0.00201789	0.212934	-0.0448292	0.470697	0.105052	Higher in SVN
infant_taxa_56	Unknown_Prevotella.7	infant_taxa_56__Unknown_Prevotella.7	Infant Fecal Microbiome (Taxa)	5-6 months	stool_microbiome_infant	0.00201789	0.00201789	0.212934	-0.0448292	0.470697	0.105052	Higher in SVN
infant_taxa_56	Unknown_Prevotella.8	infant_taxa_56__Unknown_Prevotella.8	Infant Fecal Microbiome (Taxa)	5-6 months	stool_microbiome_infant	0.00201789	0.00201789	0.212934	-0.0448292	0.470697	0.105052	Higher in SVN
infant_taxa_56	Unknown_Prevotella.9	infant_taxa_56__Unknown_Prevotella.9	Infant Fecal Microbiome (Taxa)	5-6 months	stool_microbiome_infant	0.00201789	0.00201789	0.212934	-0.0448292	0.470697	0.105052	Higher in SVN
infant_taxa_56	Unknown_Prevotella.10	infant_taxa_56__Unknown_Prevotella.10	Infant Fecal Microbiome (Taxa)	5-6 months	stool_microbiome_infant	0.00201789	0.00201789	-0.0777148	-0.33652	0.18109	0.554943	Lower in SVN
infant_taxa_56	Unknown_Prevotella.11	infant_taxa_56__Unknown_Prevotella.11	Infant Fecal Microbiome (Taxa)	5-6 months	stool_microbiome_infant	0.00201789	0.00201789	0.212934	-0.0448292	0.470697	0.105052	Higher in SVN
infant_taxa_56	Unknown_Prevotella.12	infant_taxa_56__Unknown_Prevotella.12	Infant Fecal Microbiome (Taxa)	5-6 months	stool_microbiome_infant	0.00201789	0.00201789	0.212934	-0.0448292	0.470697	0.105052	Higher in SVN
infant_taxa_56	Unknown_Prevotella.13	infant_taxa_56__Unknown_Prevotella.13	Infant Fecal Microbiome (Taxa)	5-6 months	stool_microbiome_infant	0.00201789	0.00201789	-0.0771924	-0.335999	0.181614	0.557608	Lower in SVN
infant_taxa_56	Prevotellamassilia.sp900539625	infant_taxa_56__Prevotellamassilia.sp900539625	Infant Fecal Microbiome (Taxa)	5-6 months	stool_microbiome_infant	0.00201789	0.00201789	0.212934	-0.0448292	0.470697	0.105052	Higher in SVN
infant_taxa_56	Prevotellamassilia.sp900540885	infant_taxa_56__Prevotellamassilia.sp900540885	Infant Fecal Microbiome (Taxa)	5-6 months	stool_microbiome_infant	0.00201789	0.00201789	0.212934	-0.0448292	0.470697	0.105052	Higher in SVN
infant_taxa_56	Prevotellamassilia.sp900541575	infant_taxa_56__Prevotellamassilia.sp900541575	Infant Fecal Microbiome (Taxa)	5-6 months	stool_microbiome_infant	0.00201789	0.00201789	0.212934	-0.0448292	0.470697	0.105052	Higher in SVN
infant_taxa_56	Prevotellamassilia.sp900542795	infant_taxa_56__Prevotellamassilia.sp900542795	Infant Fecal Microbiome (Taxa)	5-6 months	stool_microbiome_infant	0.00201789	0.00201789	0.212934	-0.0448292	0.470697	0.105052	Higher in SVN
infant_taxa_56	Prevotellamassilia.sp900543155	infant_taxa_56__Prevotellamassilia.sp900543155	Infant Fecal Microbiome (Taxa)	5-6 months	stool_microbiome_infant	0.00201789	0.00201789	0.212934	-0.0448292	0.470697	0.105052	Higher in SVN
infant_taxa_56	Prevotellamassilia.sp900546605	infant_taxa_56__Prevotellamassilia.sp900546605	Infant Fecal Microbiome (Taxa)	5-6 months	stool_microbiome_infant	0.00201789	0.00201789	0.212934	-0.0448292	0.470697	0.105052	Higher in SVN
infant_taxa_56	Prevotellamassilia.timonensis	infant_taxa_56__Prevotellamassilia.timonensis	Infant Fecal Microbiome (Taxa)	5-6 months	stool_microbiome_infant	0.00201789	0.00201789	0.212934	-0.0448292	0.470697	0.105052	Higher in SVN
infant_taxa_56	Unknown_Prevotellamassilia	infant_taxa_56__Unknown_Prevotellamassilia	Infant Fecal Microbiome (Taxa)	5-6 months	stool_microbiome_infant	0.00201789	0.00201789	0.212934	-0.0448292	0.470697	0.105052	Higher in SVN
infant_taxa_56	Unknown_Prevotellamassilia.1	infant_taxa_56__Unknown_Prevotellamassilia.1	Infant Fecal Microbiome (Taxa)	5-6 months	stool_microbiome_infant	0.00201789	0.00201789	0.212934	-0.0448292	0.470697	0.105052	Higher in SVN
infant_taxa_56	Unknown_UBA4334	infant_taxa_56__Unknown_UBA4334	Infant Fecal Microbiome (Taxa)	5-6 months	stool_microbiome_infant	0.00201789	0.00201789	0.212934	-0.0448292	0.470697	0.105052	Higher in SVN
infant_taxa_56	UBA4372.sp900543815	infant_taxa_56__UBA4372.sp900543815	Infant Fecal Microbiome (Taxa)	5-6 months	stool_microbiome_infant	0.00201789	0.00201789	0.212934	-0.0448292	0.470697	0.105052	Higher in SVN
infant_taxa_56	UBA6382.sp900557555	infant_taxa_56__UBA6382.sp900557555	Infant Fecal Microbiome (Taxa)	5-6 months	stool_microbiome_infant	0.00201789	0.00201789	0.212934	-0.0448292	0.470697	0.105052	Higher in SVN
infant_taxa_56	UBA6398.sp003150315	infant_taxa_56__UBA6398.sp003150315	Infant Fecal Microbiome (Taxa)	5-6 months	stool_microbiome_infant	0.00201789	0.00201789	0.212934	-0.0448292	0.470697	0.105052	Higher in SVN
infant_taxa_56	UBA6398.sp900550635	infant_taxa_56__UBA6398.sp900550635	Infant Fecal Microbiome (Taxa)	5-6 months	stool_microbiome_infant	0.00201789	0.00201789	0.212934	-0.0448292	0.470697	0.105052	Higher in SVN
infant_taxa_56	Barnesiella.intestinihominis	infant_taxa_56__Barnesiella.intestinihominis	Infant Fecal Microbiome (Taxa)	5-6 months	stool_microbiome_infant	0.00201789	0.00201789	-0.0746137	-0.333431	0.184204	0.570852	Lower in SVN
infant_taxa_56	Barnesiella.sp900542255	infant_taxa_56__Barnesiella.sp900542255	Infant Fecal Microbiome (Taxa)	5-6 months	stool_microbiome_infant	0.00201789	0.00201789	-0.0768229	-0.335631	0.181986	0.559497	Lower in SVN
infant_taxa_56	Coprobacter.fastidiosus	infant_taxa_56__Coprobacter.fastidiosus	Infant Fecal Microbiome (Taxa)	5-6 months	stool_microbiome_infant	0.00201789	0.00201789	0.212934	-0.0448292	0.470697	0.105052	Higher in SVN
infant_taxa_56	Coprobacter.secundus	infant_taxa_56__Coprobacter.secundus	Infant Fecal Microbiome (Taxa)	5-6 months	stool_microbiome_infant	0.00201789	0.00201789	0.212934	-0.0448292	0.470697	0.105052	Higher in SVN
infant_taxa_56	Dysgonomonas.capnocytophagoides	infant_taxa_56__Dysgonomonas.capnocytophagoides	Infant Fecal Microbiome (Taxa)	5-6 months	stool_microbiome_infant	0.00201789	0.00201789	0.212934	-0.0448292	0.470697	0.105052	Higher in SVN
infant_taxa_56	Dysgonomonas.gadei	infant_taxa_56__Dysgonomonas.gadei	Infant Fecal Microbiome (Taxa)	5-6 months	stool_microbiome_infant	0.00201789	0.00201789	0.212934	-0.0448292	0.470697	0.105052	Higher in SVN
infant_taxa_56	Dysgonomonas.mossii	infant_taxa_56__Dysgonomonas.mossii	Infant Fecal Microbiome (Taxa)	5-6 months	stool_microbiome_infant	0.00201789	0.00201789	0.212934	-0.0448292	0.470697	0.105052	Higher in SVN
infant_taxa_56	Dysgonomonas.sp900079735	infant_taxa_56__Dysgonomonas.sp900079735	Infant Fecal Microbiome (Taxa)	5-6 months	stool_microbiome_infant	0.00201789	0.00201789	0.212934	-0.0448292	0.470697	0.105052	Higher in SVN
infant_taxa_56	F082.sp002633315	infant_taxa_56__F082.sp002633315	Infant Fecal Microbiome (Taxa)	5-6 months	stool_microbiome_infant	0.00201789	0.00201789	0.212934	-0.0448292	0.470697	0.105052	Higher in SVN
infant_taxa_56	Butyricimonas.faecalis	infant_taxa_56__Butyricimonas.faecalis	Infant Fecal Microbiome (Taxa)	5-6 months	stool_microbiome_infant	0.00201789	0.00201789	0.212934	-0.0448292	0.470697	0.105052	Higher in SVN
infant_taxa_56	Unknown_Butyricimonas	infant_taxa_56__Unknown_Butyricimonas	Infant Fecal Microbiome (Taxa)	5-6 months	stool_microbiome_infant	0.00201789	0.00201789	0.212934	-0.0448292	0.470697	0.105052	Higher in SVN
infant_taxa_56	Gabonibacter.massiliensis	infant_taxa_56__Gabonibacter.massiliensis	Infant Fecal Microbiome (Taxa)	5-6 months	stool_microbiome_infant	0.00201789	0.00201789	0.212934	-0.0448292	0.470697	0.105052	Higher in SVN
infant_taxa_56	Odoribacter.massiliensis	infant_taxa_56__Odoribacter.massiliensis	Infant Fecal Microbiome (Taxa)	5-6 months	stool_microbiome_infant	0.00201789	0.00201789	0.212934	-0.0448292	0.470697	0.105052	Higher in SVN
infant_taxa_56	Odoribacter.sp900544025	infant_taxa_56__Odoribacter.sp900544025	Infant Fecal Microbiome (Taxa)	5-6 months	stool_microbiome_infant	0.00201789	0.00201789	0.212934	-0.0448292	0.470697	0.105052	Higher in SVN
infant_taxa_56	Odoribacter.splanchnicus	infant_taxa_56__Odoribacter.splanchnicus	Infant Fecal Microbiome (Taxa)	5-6 months	stool_microbiome_infant	0.00201789	0.00201789	0.212934	-0.0448292	0.470697	0.105052	Higher in SVN
infant_taxa_56	C941.sp004557565	infant_taxa_56__C941.sp004557565	Infant Fecal Microbiome (Taxa)	5-6 months	stool_microbiome_infant	0.00201789	0.00201789	0.212934	-0.0448292	0.470697	0.105052	Higher in SVN
infant_taxa_56	C941.sp900321725	infant_taxa_56__C941.sp900321725	Infant Fecal Microbiome (Taxa)	5-6 months	stool_microbiome_infant	0.00201789	0.00201789	0.212934	-0.0448292	0.470697	0.105052	Higher in SVN
infant_taxa_56	Unknown_C941	infant_taxa_56__Unknown_C941	Infant Fecal Microbiome (Taxa)	5-6 months	stool_microbiome_infant	0.00201789	0.00201789	0.212934	-0.0448292	0.470697	0.105052	Higher in SVN
infant_taxa_56	Unknown_C941.1	infant_taxa_56__Unknown_C941.1	Infant Fecal Microbiome (Taxa)	5-6 months	stool_microbiome_infant	0.00201789	0.00201789	0.212934	-0.0448292	0.470697	0.105052	Higher in SVN
infant_taxa_56	Unknown_C941.2	infant_taxa_56__Unknown_C941.2	Infant Fecal Microbiome (Taxa)	5-6 months	stool_microbiome_infant	0.00201789	0.00201789	0.212934	-0.0448292	0.470697	0.105052	Higher in SVN
infant_taxa_56	CAG.279.sp900544305	infant_taxa_56__CAG.279.sp900544305	Infant Fecal Microbiome (Taxa)	5-6 months	stool_microbiome_infant	0.00201789	0.00201789	0.212934	-0.0448292	0.470697	0.105052	Higher in SVN
infant_taxa_56	CAG.485.sp001701295	infant_taxa_56__CAG.485.sp001701295	Infant Fecal Microbiome (Taxa)	5-6 months	stool_microbiome_infant	0.00201789	0.00201789	0.212934	-0.0448292	0.470697	0.105052	Higher in SVN
infant_taxa_56	CAG.485.sp900550645	infant_taxa_56__CAG.485.sp900550645	Infant Fecal Microbiome (Taxa)	5-6 months	stool_microbiome_infant	0.00201789	0.00201789	0.212934	-0.0448292	0.470697	0.105052	Higher in SVN
infant_taxa_56	CAG.873.sp001701165	infant_taxa_56__CAG.873.sp001701165	Infant Fecal Microbiome (Taxa)	5-6 months	stool_microbiome_infant	0.00201789	0.00201789	0.212934	-0.0448292	0.470697	0.105052	Higher in SVN
infant_taxa_56	CAG.873.sp900540625	infant_taxa_56__CAG.873.sp900540625	Infant Fecal Microbiome (Taxa)	5-6 months	stool_microbiome_infant	0.00201789	0.00201789	0.212934	-0.0448292	0.470697	0.105052	Higher in SVN
infant_taxa_56	CAG.873.sp900555715	infant_taxa_56__CAG.873.sp900555715	Infant Fecal Microbiome (Taxa)	5-6 months	stool_microbiome_infant	0.00201789	0.00201789	0.212934	-0.0448292	0.470697	0.105052	Higher in SVN
infant_taxa_56	Unknown_CAG.873	infant_taxa_56__Unknown_CAG.873	Infant Fecal Microbiome (Taxa)	5-6 months	stool_microbiome_infant	0.00201789	0.00201789	0.212934	-0.0448292	0.470697	0.105052	Higher in SVN
infant_taxa_56	Muribaculum.sp002492595	infant_taxa_56__Muribaculum.sp002492595	Infant Fecal Microbiome (Taxa)	5-6 months	stool_microbiome_infant	0.00201789	0.00201789	0.212934	-0.0448292	0.470697	0.105052	Higher in SVN
infant_taxa_56	UBA7173.sp900545955	infant_taxa_56__UBA7173.sp900545955	Infant Fecal Microbiome (Taxa)	5-6 months	stool_microbiome_infant	0.00201789	0.00201789	0.212934	-0.0448292	0.470697	0.105052	Higher in SVN
infant_taxa_56	Unknown_Muribaculaceae	infant_taxa_56__Unknown_Muribaculaceae	Infant Fecal Microbiome (Taxa)	5-6 months	stool_microbiome_infant	0.00201789	0.00201789	0.212934	-0.0448292	0.470697	0.105052	Higher in SVN
infant_taxa_56	UBA3388.sp004551865	infant_taxa_56__UBA3388.sp004551865	Infant Fecal Microbiome (Taxa)	5-6 months	stool_microbiome_infant	0.00201789	0.00201789	0.212934	-0.0448292	0.470697	0.105052	Higher in SVN
infant_taxa_56	UBA3388.sp900545215	infant_taxa_56__UBA3388.sp900545215	Infant Fecal Microbiome (Taxa)	5-6 months	stool_microbiome_infant	0.00201789	0.00201789	0.212934	-0.0448292	0.470697	0.105052	Higher in SVN
infant_taxa_56	RF16.sp900556095	infant_taxa_56__RF16.sp900556095	Infant Fecal Microbiome (Taxa)	5-6 months	stool_microbiome_infant	0.00201789	0.00201789	0.212934	-0.0448292	0.470697	0.105052	Higher in SVN
infant_taxa_56	Unknown_RF16	infant_taxa_56__Unknown_RF16	Infant Fecal Microbiome (Taxa)	5-6 months	stool_microbiome_infant	0.00201789	0.00201789	0.212934	-0.0448292	0.470697	0.105052	Higher in SVN
infant_taxa_56	Unknown_RF16.1	infant_taxa_56__Unknown_RF16.1	Infant Fecal Microbiome (Taxa)	5-6 months	stool_microbiome_infant	0.00201789	0.00201789	0.212934	-0.0448292	0.470697	0.105052	Higher in SVN
infant_taxa_56	Porphyromonas.asaccharolytica	infant_taxa_56__Porphyromonas.asaccharolytica	Infant Fecal Microbiome (Taxa)	5-6 months	stool_microbiome_infant	0.00201789	0.00201789	0.212934	-0.0448292	0.470697	0.105052	Higher in SVN
infant_taxa_56	Porphyromonas.endodontalis	infant_taxa_56__Porphyromonas.endodontalis	Infant Fecal Microbiome (Taxa)	5-6 months	stool_microbiome_infant	0.00201789	0.00201789	0.212934	-0.0448292	0.470697	0.105052	Higher in SVN
infant_taxa_56	Porphyromonas.sp900538385	infant_taxa_56__Porphyromonas.sp900538385	Infant Fecal Microbiome (Taxa)	5-6 months	stool_microbiome_infant	0.00201789	0.00201789	0.212934	-0.0448292	0.470697	0.105052	Higher in SVN
infant_taxa_56	Porphyromonas.sp900539155	infant_taxa_56__Porphyromonas.sp900539155	Infant Fecal Microbiome (Taxa)	5-6 months	stool_microbiome_infant	0.00201789	0.00201789	0.212934	-0.0448292	0.470697	0.105052	Higher in SVN
infant_taxa_56	Porphyromonas.sp900548415	infant_taxa_56__Porphyromonas.sp900548415	Infant Fecal Microbiome (Taxa)	5-6 months	stool_microbiome_infant	0.00201789	0.00201789	0.212934	-0.0448292	0.470697	0.105052	Higher in SVN
infant_taxa_56	Porphyromonas.uenonis	infant_taxa_56__Porphyromonas.uenonis	Infant Fecal Microbiome (Taxa)	5-6 months	stool_microbiome_infant	0.00201789	0.00201789	0.212934	-0.0448292	0.470697	0.105052	Higher in SVN
infant_taxa_56	Porphyromonas.uenonis_A	infant_taxa_56__Porphyromonas.uenonis_A	Infant Fecal Microbiome (Taxa)	5-6 months	stool_microbiome_infant	0.00201789	0.00201789	0.212934	-0.0448292	0.470697	0.105052	Higher in SVN
infant_taxa_56	Unknown_Porphyromonas	infant_taxa_56__Unknown_Porphyromonas	Infant Fecal Microbiome (Taxa)	5-6 months	stool_microbiome_infant	0.00201789	0.00201789	0.212934	-0.0448292	0.470697	0.105052	Higher in SVN
infant_taxa_56	Unknown_Porphyromonas.1	infant_taxa_56__Unknown_Porphyromonas.1	Infant Fecal Microbiome (Taxa)	5-6 months	stool_microbiome_infant	0.00201789	0.00201789	0.212934	-0.0448292	0.470697	0.105052	Higher in SVN
infant_taxa_56	Unknown_Porphyromonas.2	infant_taxa_56__Unknown_Porphyromonas.2	Infant Fecal Microbiome (Taxa)	5-6 months	stool_microbiome_infant	0.00201789	0.00201789	0.212934	-0.0448292	0.470697	0.105052	Higher in SVN
infant_taxa_56	Unknown_Porphyromonas.3	infant_taxa_56__Unknown_Porphyromonas.3	Infant Fecal Microbiome (Taxa)	5-6 months	stool_microbiome_infant	0.00201789	0.00201789	0.212934	-0.0448292	0.470697	0.105052	Higher in SVN
infant_taxa_56	Porphyromonas_A.somerae	infant_taxa_56__Porphyromonas_A.somerae	Infant Fecal Microbiome (Taxa)	5-6 months	stool_microbiome_infant	0.00201789	0.00201789	0.212934	-0.0448292	0.470697	0.105052	Higher in SVN
infant_taxa_56	Porphyromonas_A.sp001808555	infant_taxa_56__Porphyromonas_A.sp001808555	Infant Fecal Microbiome (Taxa)	5-6 months	stool_microbiome_infant	0.00201789	0.00201789	0.212934	-0.0448292	0.470697	0.105052	Higher in SVN
infant_taxa_56	Alistipes.finegoldii	infant_taxa_56__Alistipes.finegoldii	Infant Fecal Microbiome (Taxa)	5-6 months	stool_microbiome_infant	0.00201789	0.00201789	0.212934	-0.0448292	0.470697	0.105052	Higher in SVN
infant_taxa_56	Alistipes.obesi	infant_taxa_56__Alistipes.obesi	Infant Fecal Microbiome (Taxa)	5-6 months	stool_microbiome_infant	0.00201789	0.00201789	0.212934	-0.0448292	0.470697	0.105052	Higher in SVN
infant_taxa_56	Alistipes.putredinis	infant_taxa_56__Alistipes.putredinis	Infant Fecal Microbiome (Taxa)	5-6 months	stool_microbiome_infant	0.00201789	0.00201789	-0.07728	-0.336087	0.181527	0.557161	Lower in SVN
infant_taxa_56	Alistipes.senegalensis	infant_taxa_56__Alistipes.senegalensis	Infant Fecal Microbiome (Taxa)	5-6 months	stool_microbiome_infant	0.00201789	0.00201789	0.212934	-0.0448292	0.470697	0.105052	Higher in SVN
infant_taxa_56	Alistipes.shahii	infant_taxa_56__Alistipes.shahii	Infant Fecal Microbiome (Taxa)	5-6 months	stool_microbiome_infant	0.00201789	0.00201789	0.212934	-0.0448292	0.470697	0.105052	Higher in SVN
infant_taxa_56	Alistipes.sp900083545	infant_taxa_56__Alistipes.sp900083545	Infant Fecal Microbiome (Taxa)	5-6 months	stool_microbiome_infant	0.00201789	0.00201789	0.212934	-0.0448292	0.470697	0.105052	Higher in SVN
infant_taxa_56	Alistipes.sp900541585	infant_taxa_56__Alistipes.sp900541585	Infant Fecal Microbiome (Taxa)	5-6 months	stool_microbiome_infant	0.00201789	0.00201789	0.212934	-0.0448292	0.470697	0.105052	Higher in SVN
infant_taxa_56	Alistipes.sp900546065	infant_taxa_56__Alistipes.sp900546065	Infant Fecal Microbiome (Taxa)	5-6 months	stool_microbiome_infant	0.00201789	0.00201789	0.212934	-0.0448292	0.470697	0.105052	Higher in SVN
infant_taxa_56	Unknown_Alistipes	infant_taxa_56__Unknown_Alistipes	Infant Fecal Microbiome (Taxa)	5-6 months	stool_microbiome_infant	0.00201789	0.00201789	0.212934	-0.0448292	0.470697	0.105052	Higher in SVN
infant_taxa_56	Alistipes_A.ihumii	infant_taxa_56__Alistipes_A.ihumii	Infant Fecal Microbiome (Taxa)	5-6 months	stool_microbiome_infant	0.00201789	0.00201789	0.212934	-0.0448292	0.470697	0.105052	Higher in SVN
infant_taxa_56	Alistipes_A.sp900539755	infant_taxa_56__Alistipes_A.sp900539755	Infant Fecal Microbiome (Taxa)	5-6 months	stool_microbiome_infant	0.00201789	0.00201789	0.212934	-0.0448292	0.470697	0.105052	Higher in SVN
infant_taxa_56	Tidjanibacter.inops	infant_taxa_56__Tidjanibacter.inops	Infant Fecal Microbiome (Taxa)	5-6 months	stool_microbiome_infant	0.00201789	0.00201789	0.212934	-0.0448292	0.470697	0.105052	Higher in SVN
infant_taxa_56	Unknown_Rikenellaceae	infant_taxa_56__Unknown_Rikenellaceae	Infant Fecal Microbiome (Taxa)	5-6 months	stool_microbiome_infant	0.00201789	0.00201789	0.212934	-0.0448292	0.470697	0.105052	Higher in SVN
infant_taxa_56	Unknown_Rikenellaceae.1	infant_taxa_56__Unknown_Rikenellaceae.1	Infant Fecal Microbiome (Taxa)	5-6 months	stool_microbiome_infant	0.00201789	0.00201789	0.212934	-0.0448292	0.470697	0.105052	Higher in SVN
infant_taxa_56	Parabacteroides.bouchesdurhonensis	infant_taxa_56__Parabacteroides.bouchesdurhonensis	Infant Fecal Microbiome (Taxa)	5-6 months	stool_microbiome_infant	0.00201789	0.00201789	0.212934	-0.0448292	0.470697	0.105052	Higher in SVN
infant_taxa_56	Parabacteroides.chinchillae	infant_taxa_56__Parabacteroides.chinchillae	Infant Fecal Microbiome (Taxa)	5-6 months	stool_microbiome_infant	0.00201789	0.00201789	0.212934	-0.0448292	0.470697	0.105052	Higher in SVN
infant_taxa_56	Parabacteroides.gordonii	infant_taxa_56__Parabacteroides.gordonii	Infant Fecal Microbiome (Taxa)	5-6 months	stool_microbiome_infant	0.00201789	0.00201789	0.212934	-0.0448292	0.470697	0.105052	Higher in SVN
infant_taxa_56	Parabacteroides.sp000436495	infant_taxa_56__Parabacteroides.sp000436495	Infant Fecal Microbiome (Taxa)	5-6 months	stool_microbiome_infant	0.00201789	0.00201789	0.212934	-0.0448292	0.470697	0.105052	Higher in SVN
infant_taxa_56	Parabacteroides.sp900155425	infant_taxa_56__Parabacteroides.sp900155425	Infant Fecal Microbiome (Taxa)	5-6 months	stool_microbiome_infant	0.00201789	0.00201789	0.212934	-0.0448292	0.470697	0.105052	Higher in SVN
infant_taxa_56	Parabacteroides.sp900541965	infant_taxa_56__Parabacteroides.sp900541965	Infant Fecal Microbiome (Taxa)	5-6 months	stool_microbiome_infant	0.00201789	0.00201789	0.212934	-0.0448292	0.470697	0.105052	Higher in SVN
infant_taxa_56	Parabacteroides.sp900549585	infant_taxa_56__Parabacteroides.sp900549585	Infant Fecal Microbiome (Taxa)	5-6 months	stool_microbiome_infant	0.00201789	0.00201789	0.212934	-0.0448292	0.470697	0.105052	Higher in SVN
infant_taxa_56	Unknown_Parabacteroides	infant_taxa_56__Unknown_Parabacteroides	Infant Fecal Microbiome (Taxa)	5-6 months	stool_microbiome_infant	0.00201789	0.00201789	0.212934	-0.0448292	0.470697	0.105052	Higher in SVN
infant_taxa_56	Unknown_Parabacteroides.1	infant_taxa_56__Unknown_Parabacteroides.1	Infant Fecal Microbiome (Taxa)	5-6 months	stool_microbiome_infant	0.00201789	0.00201789	0.212934	-0.0448292	0.470697	0.105052	Higher in SVN
infant_taxa_56	Unknown_Parabacteroides.2	infant_taxa_56__Unknown_Parabacteroides.2	Infant Fecal Microbiome (Taxa)	5-6 months	stool_microbiome_infant	0.00201789	0.00201789	0.212934	-0.0448292	0.470697	0.105052	Higher in SVN
infant_taxa_56	UBA11471.sp000434215	infant_taxa_56__UBA11471.sp000434215	Infant Fecal Microbiome (Taxa)	5-6 months	stool_microbiome_infant	0.00201789	0.00201789	0.212934	-0.0448292	0.470697	0.105052	Higher in SVN
infant_taxa_56	UBA11471.sp900542765	infant_taxa_56__UBA11471.sp900542765	Infant Fecal Microbiome (Taxa)	5-6 months	stool_microbiome_infant	0.00201789	0.00201789	0.212934	-0.0448292	0.470697	0.105052	Higher in SVN
infant_taxa_56	RC9.sp000431015	infant_taxa_56__RC9.sp000431015	Infant Fecal Microbiome (Taxa)	5-6 months	stool_microbiome_infant	0.00201789	0.00201789	0.212934	-0.0448292	0.470697	0.105052	Higher in SVN
infant_taxa_56	RC9.sp000432515	infant_taxa_56__RC9.sp000432515	Infant Fecal Microbiome (Taxa)	5-6 months	stool_microbiome_infant	0.00201789	0.00201789	0.212934	-0.0448292	0.470697	0.105052	Higher in SVN
infant_taxa_56	RC9.sp000432655	infant_taxa_56__RC9.sp000432655	Infant Fecal Microbiome (Taxa)	5-6 months	stool_microbiome_infant	0.00201789	0.00201789	0.212934	-0.0448292	0.470697	0.105052	Higher in SVN
infant_taxa_56	RC9.sp000433355	infant_taxa_56__RC9.sp000433355	Infant Fecal Microbiome (Taxa)	5-6 months	stool_microbiome_infant	0.00201789	0.00201789	0.212934	-0.0448292	0.470697	0.105052	Higher in SVN
infant_taxa_56	RC9.sp000434935	infant_taxa_56__RC9.sp000434935	Infant Fecal Microbiome (Taxa)	5-6 months	stool_microbiome_infant	0.00201789	0.00201789	0.212934	-0.0448292	0.470697	0.105052	Higher in SVN
infant_taxa_56	RC9.sp000435075	infant_taxa_56__RC9.sp000435075	Infant Fecal Microbiome (Taxa)	5-6 months	stool_microbiome_infant	0.00201789	0.00201789	0.212934	-0.0448292	0.470697	0.105052	Higher in SVN
infant_taxa_56	RC9.sp900541925	infant_taxa_56__RC9.sp900541925	Infant Fecal Microbiome (Taxa)	5-6 months	stool_microbiome_infant	0.00201789	0.00201789	0.212934	-0.0448292	0.470697	0.105052	Higher in SVN
infant_taxa_56	RC9.sp900544195	infant_taxa_56__RC9.sp900544195	Infant Fecal Microbiome (Taxa)	5-6 months	stool_microbiome_infant	0.00201789	0.00201789	0.212934	-0.0448292	0.470697	0.105052	Higher in SVN
infant_taxa_56	RC9.sp900545245	infant_taxa_56__RC9.sp900545245	Infant Fecal Microbiome (Taxa)	5-6 months	stool_microbiome_infant	0.00201789	0.00201789	0.212934	-0.0448292	0.470697	0.105052	Higher in SVN
infant_taxa_56	RC9.sp900546445	infant_taxa_56__RC9.sp900546445	Infant Fecal Microbiome (Taxa)	5-6 months	stool_microbiome_infant	0.00201789	0.00201789	0.212934	-0.0448292	0.470697	0.105052	Higher in SVN
infant_taxa_56	RC9.sp900546925	infant_taxa_56__RC9.sp900546925	Infant Fecal Microbiome (Taxa)	5-6 months	stool_microbiome_infant	0.00201789	0.00201789	0.212934	-0.0448292	0.470697	0.105052	Higher in SVN
infant_taxa_56	Unknown_RC9	infant_taxa_56__Unknown_RC9	Infant Fecal Microbiome (Taxa)	5-6 months	stool_microbiome_infant	0.00201789	0.00201789	0.212934	-0.0448292	0.470697	0.105052	Higher in SVN
infant_taxa_56	Unknown_RC9.1	infant_taxa_56__Unknown_RC9.1	Infant Fecal Microbiome (Taxa)	5-6 months	stool_microbiome_infant	0.00201789	0.00201789	0.212934	-0.0448292	0.470697	0.105052	Higher in SVN
infant_taxa_56	UBA1232.sp900544815	infant_taxa_56__UBA1232.sp900544815	Infant Fecal Microbiome (Taxa)	5-6 months	stool_microbiome_infant	0.00201789	0.00201789	0.212934	-0.0448292	0.470697	0.105052	Higher in SVN
infant_taxa_56	Unknown_Bacteroidales	infant_taxa_56__Unknown_Bacteroidales	Infant Fecal Microbiome (Taxa)	5-6 months	stool_microbiome_infant	0.00201789	0.00201789	0.212934	-0.0448292	0.470697	0.105052	Higher in SVN
infant_taxa_56	UBA1820.sp002314265	infant_taxa_56__UBA1820.sp002314265	Infant Fecal Microbiome (Taxa)	5-6 months	stool_microbiome_infant	0.00201789	0.00201789	0.212934	-0.0448292	0.470697	0.105052	Higher in SVN
infant_taxa_56	UBA1820.sp003150615	infant_taxa_56__UBA1820.sp003150615	Infant Fecal Microbiome (Taxa)	5-6 months	stool_microbiome_infant	0.00201789	0.00201789	0.212934	-0.0448292	0.470697	0.105052	Higher in SVN
infant_taxa_56	Unknown_UBA1820	infant_taxa_56__Unknown_UBA1820	Infant Fecal Microbiome (Taxa)	5-6 months	stool_microbiome_infant	0.00201789	0.00201789	0.212934	-0.0448292	0.470697	0.105052	Higher in SVN
infant_taxa_56	Campylobacter_A.curvus	infant_taxa_56__Campylobacter_A.curvus	Infant Fecal Microbiome (Taxa)	5-6 months	stool_microbiome_infant	0.00201789	0.00201789	-0.0745175	-0.333335	0.1843	0.571349	Lower in SVN
infant_taxa_56	Campylobacter_B.hominis	infant_taxa_56__Campylobacter_B.hominis	Infant Fecal Microbiome (Taxa)	5-6 months	stool_microbiome_infant	0.00201789	0.00201789	0.212934	-0.0448292	0.470697	0.105052	Higher in SVN
infant_taxa_56	Campylobacter_D.sp900539255	infant_taxa_56__Campylobacter_D.sp900539255	Infant Fecal Microbiome (Taxa)	5-6 months	stool_microbiome_infant	0.00201789	0.00201789	0.212934	-0.0448292	0.470697	0.105052	Higher in SVN
infant_taxa_56	Unknown_Campylobacter_D	infant_taxa_56__Unknown_Campylobacter_D	Infant Fecal Microbiome (Taxa)	5-6 months	stool_microbiome_infant	0.00201789	0.00201789	0.212934	-0.0448292	0.470697	0.105052	Higher in SVN
infant_taxa_56	Helicobacter_B.fennelliae	infant_taxa_56__Helicobacter_B.fennelliae	Infant Fecal Microbiome (Taxa)	5-6 months	stool_microbiome_infant	0.00201789	0.00201789	-0.140635	-0.399076	0.117806	0.285025	Lower in SVN
infant_taxa_56	Helicobacter_C.magdeburgensis	infant_taxa_56__Helicobacter_C.magdeburgensis	Infant Fecal Microbiome (Taxa)	5-6 months	stool_microbiome_infant	0.00201789	0.00201789	0.212934	-0.0448292	0.470697	0.105052	Higher in SVN
infant_taxa_56	Unknown_Helicobacteraceae	infant_taxa_56__Unknown_Helicobacteraceae	Infant Fecal Microbiome (Taxa)	5-6 months	stool_microbiome_infant	0.00201789	0.00201789	0.212934	-0.0448292	0.470697	0.105052	Higher in SVN
infant_taxa_56	CAG.196.sp002102975	infant_taxa_56__CAG.196.sp002102975	Infant Fecal Microbiome (Taxa)	5-6 months	stool_microbiome_infant	0.00201789	0.00201789	0.212934	-0.0448292	0.470697	0.105052	Higher in SVN
infant_taxa_56	CAG.196.sp900549855	infant_taxa_56__CAG.196.sp900549855	Infant Fecal Microbiome (Taxa)	5-6 months	stool_microbiome_infant	0.00201789	0.00201789	0.212934	-0.0448292	0.470697	0.105052	Higher in SVN
infant_taxa_56	CAG.196.sp900553895	infant_taxa_56__CAG.196.sp900553895	Infant Fecal Microbiome (Taxa)	5-6 months	stool_microbiome_infant	0.00201789	0.00201789	0.212934	-0.0448292	0.470697	0.105052	Higher in SVN
infant_taxa_56	Unknown_CAG.196	infant_taxa_56__Unknown_CAG.196	Infant Fecal Microbiome (Taxa)	5-6 months	stool_microbiome_infant	0.00201789	0.00201789	0.212934	-0.0448292	0.470697	0.105052	Higher in SVN
infant_taxa_56	Unknown_CAG.196.1	infant_taxa_56__Unknown_CAG.196.1	Infant Fecal Microbiome (Taxa)	5-6 months	stool_microbiome_infant	0.00201789	0.00201789	0.212934	-0.0448292	0.470697	0.105052	Higher in SVN
infant_taxa_56	Unknown_CAG.196.2	infant_taxa_56__Unknown_CAG.196.2	Infant Fecal Microbiome (Taxa)	5-6 months	stool_microbiome_infant	0.00201789	0.00201789	0.212934	-0.0448292	0.470697	0.105052	Higher in SVN
infant_taxa_56	Unknown_CAG.196.3	infant_taxa_56__Unknown_CAG.196.3	Infant Fecal Microbiome (Taxa)	5-6 months	stool_microbiome_infant	0.00201789	0.00201789	0.212934	-0.0448292	0.470697	0.105052	Higher in SVN
infant_taxa_56	Unknown_CAG.196.4	infant_taxa_56__Unknown_CAG.196.4	Infant Fecal Microbiome (Taxa)	5-6 months	stool_microbiome_infant	0.00201789	0.00201789	0.212934	-0.0448292	0.470697	0.105052	Higher in SVN
infant_taxa_56	Unknown_CAG.196.5	infant_taxa_56__Unknown_CAG.196.5	Infant Fecal Microbiome (Taxa)	5-6 months	stool_microbiome_infant	0.00201789	0.00201789	0.212934	-0.0448292	0.470697	0.105052	Higher in SVN
infant_taxa_56	Unknown_CAG.196.6	infant_taxa_56__Unknown_CAG.196.6	Infant Fecal Microbiome (Taxa)	5-6 months	stool_microbiome_infant	0.00201789	0.00201789	0.212934	-0.0448292	0.470697	0.105052	Higher in SVN
infant_taxa_56	Unknown_CAG.196.7	infant_taxa_56__Unknown_CAG.196.7	Infant Fecal Microbiome (Taxa)	5-6 months	stool_microbiome_infant	0.00201789	0.00201789	0.212934	-0.0448292	0.470697	0.105052	Higher in SVN
infant_taxa_56	Unknown_CAG.196.8	infant_taxa_56__Unknown_CAG.196.8	Infant Fecal Microbiome (Taxa)	5-6 months	stool_microbiome_infant	0.00201789	0.00201789	0.212934	-0.0448292	0.470697	0.105052	Higher in SVN
infant_taxa_56	Unknown_CAG.196.9	infant_taxa_56__Unknown_CAG.196.9	Infant Fecal Microbiome (Taxa)	5-6 months	stool_microbiome_infant	0.00201789	0.00201789	0.212934	-0.0448292	0.470697	0.105052	Higher in SVN
infant_taxa_56	Unknown_CAG.196.10	infant_taxa_56__Unknown_CAG.196.10	Infant Fecal Microbiome (Taxa)	5-6 months	stool_microbiome_infant	0.00201789	0.00201789	0.212934	-0.0448292	0.470697	0.105052	Higher in SVN
infant_taxa_56	Unknown_CAG.196.11	infant_taxa_56__Unknown_CAG.196.11	Infant Fecal Microbiome (Taxa)	5-6 months	stool_microbiome_infant	0.00201789	0.00201789	0.212934	-0.0448292	0.470697	0.105052	Higher in SVN
infant_taxa_56	Unknown_CAG.196.12	infant_taxa_56__Unknown_CAG.196.12	Infant Fecal Microbiome (Taxa)	5-6 months	stool_microbiome_infant	0.00201789	0.00201789	0.212934	-0.0448292	0.470697	0.105052	Higher in SVN
infant_taxa_56	CAG.306.sp000980375	infant_taxa_56__CAG.306.sp000980375	Infant Fecal Microbiome (Taxa)	5-6 months	stool_microbiome_infant	0.00201789	0.00201789	0.212934	-0.0448292	0.470697	0.105052	Higher in SVN
infant_taxa_56	CAG.484.sp900321895	infant_taxa_56__CAG.484.sp900321895	Infant Fecal Microbiome (Taxa)	5-6 months	stool_microbiome_infant	0.00201789	0.00201789	0.212934	-0.0448292	0.470697	0.105052	Higher in SVN
infant_taxa_56	QAMI01.sp003150395	infant_taxa_56__QAMI01.sp003150395	Infant Fecal Microbiome (Taxa)	5-6 months	stool_microbiome_infant	0.00201789	0.00201789	0.212934	-0.0448292	0.470697	0.105052	Higher in SVN
infant_taxa_56	QHMH01.sp003258795	infant_taxa_56__QHMH01.sp003258795	Infant Fecal Microbiome (Taxa)	5-6 months	stool_microbiome_infant	0.00201789	0.00201789	0.212934	-0.0448292	0.470697	0.105052	Higher in SVN
infant_taxa_56	RUG841.sp900313795	infant_taxa_56__RUG841.sp900313795	Infant Fecal Microbiome (Taxa)	5-6 months	stool_microbiome_infant	0.00201789	0.00201789	0.212934	-0.0448292	0.470697	0.105052	Higher in SVN
infant_taxa_56	Unknown_RUG841	infant_taxa_56__Unknown_RUG841	Infant Fecal Microbiome (Taxa)	5-6 months	stool_microbiome_infant	0.00201789	0.00201789	0.212934	-0.0448292	0.470697	0.105052	Higher in SVN
infant_taxa_56	Unknown_RUG841.1	infant_taxa_56__Unknown_RUG841.1	Infant Fecal Microbiome (Taxa)	5-6 months	stool_microbiome_infant	0.00201789	0.00201789	0.212934	-0.0448292	0.470697	0.105052	Higher in SVN
infant_taxa_56	Unknown_RUG841.2	infant_taxa_56__Unknown_RUG841.2	Infant Fecal Microbiome (Taxa)	5-6 months	stool_microbiome_infant	0.00201789	0.00201789	0.212934	-0.0448292	0.470697	0.105052	Higher in SVN
infant_taxa_56	UBA2883.sp002103075	infant_taxa_56__UBA2883.sp002103075	Infant Fecal Microbiome (Taxa)	5-6 months	stool_microbiome_infant	0.00201789	0.00201789	0.212934	-0.0448292	0.470697	0.105052	Higher in SVN
infant_taxa_56	Unknown_UBA2883	infant_taxa_56__Unknown_UBA2883	Infant Fecal Microbiome (Taxa)	5-6 months	stool_microbiome_infant	0.00201789	0.00201789	0.212934	-0.0448292	0.470697	0.105052	Higher in SVN
infant_taxa_56	Unknown_UBA2883.1	infant_taxa_56__Unknown_UBA2883.1	Infant Fecal Microbiome (Taxa)	5-6 months	stool_microbiome_infant	0.00201789	0.00201789	0.212934	-0.0448292	0.470697	0.105052	Higher in SVN
infant_taxa_56	Unknown_UBA2883.2	infant_taxa_56__Unknown_UBA2883.2	Infant Fecal Microbiome (Taxa)	5-6 months	stool_microbiome_infant	0.00201789	0.00201789	0.212934	-0.0448292	0.470697	0.105052	Higher in SVN
infant_taxa_56	UBA6984.sp003258725	infant_taxa_56__UBA6984.sp003258725	Infant Fecal Microbiome (Taxa)	5-6 months	stool_microbiome_infant	0.00201789	0.00201789	0.212934	-0.0448292	0.470697	0.105052	Higher in SVN
infant_taxa_56	UBA6984.sp900550295	infant_taxa_56__UBA6984.sp900550295	Infant Fecal Microbiome (Taxa)	5-6 months	stool_microbiome_infant	0.00201789	0.00201789	0.212934	-0.0448292	0.470697	0.105052	Higher in SVN
infant_taxa_56	Unknown_UBA6984	infant_taxa_56__Unknown_UBA6984	Infant Fecal Microbiome (Taxa)	5-6 months	stool_microbiome_infant	0.00201789	0.00201789	0.212934	-0.0448292	0.470697	0.105052	Higher in SVN
infant_taxa_56	Unknown_UBA6984.1	infant_taxa_56__Unknown_UBA6984.1	Infant Fecal Microbiome (Taxa)	5-6 months	stool_microbiome_infant	0.00201789	0.00201789	0.212934	-0.0448292	0.470697	0.105052	Higher in SVN
infant_taxa_56	Unknown_UBA791	infant_taxa_56__Unknown_UBA791	Infant Fecal Microbiome (Taxa)	5-6 months	stool_microbiome_infant	0.00201789	0.00201789	0.212934	-0.0448292	0.470697	0.105052	Higher in SVN
infant_taxa_56	Unknown_UBA791.1	infant_taxa_56__Unknown_UBA791.1	Infant Fecal Microbiome (Taxa)	5-6 months	stool_microbiome_infant	0.00201789	0.00201789	0.212934	-0.0448292	0.470697	0.105052	Higher in SVN
infant_taxa_56	UMGS1477.sp900552205	infant_taxa_56__UMGS1477.sp900552205	Infant Fecal Microbiome (Taxa)	5-6 months	stool_microbiome_infant	0.00201789	0.00201789	0.212934	-0.0448292	0.470697	0.105052	Higher in SVN
infant_taxa_56	Unknown_UMGS1477	infant_taxa_56__Unknown_UMGS1477	Infant Fecal Microbiome (Taxa)	5-6 months	stool_microbiome_infant	0.00201789	0.00201789	0.212934	-0.0448292	0.470697	0.105052	Higher in SVN
infant_taxa_56	Unknown_UMGS1477.1	infant_taxa_56__Unknown_UMGS1477.1	Infant Fecal Microbiome (Taxa)	5-6 months	stool_microbiome_infant	0.00201789	0.00201789	0.212934	-0.0448292	0.470697	0.105052	Higher in SVN
infant_taxa_56	UMGS1585.sp900553205	infant_taxa_56__UMGS1585.sp900553205	Infant Fecal Microbiome (Taxa)	5-6 months	stool_microbiome_infant	0.00201789	0.00201789	0.212934	-0.0448292	0.470697	0.105052	Higher in SVN
infant_taxa_56	Unknown_UMGS1585	infant_taxa_56__Unknown_UMGS1585	Infant Fecal Microbiome (Taxa)	5-6 months	stool_microbiome_infant	0.00201789	0.00201789	0.212934	-0.0448292	0.470697	0.105052	Higher in SVN
infant_taxa_56	Unknown_Gastranaerophilaceae	infant_taxa_56__Unknown_Gastranaerophilaceae	Infant Fecal Microbiome (Taxa)	5-6 months	stool_microbiome_infant	0.00201789	0.00201789	0.212934	-0.0448292	0.470697	0.105052	Higher in SVN
infant_taxa_56	Unknown_Gastranaerophilaceae.1	infant_taxa_56__Unknown_Gastranaerophilaceae.1	Infant Fecal Microbiome (Taxa)	5-6 months	stool_microbiome_infant	0.00201789	0.00201789	0.212934	-0.0448292	0.470697	0.105052	Higher in SVN
infant_taxa_56	Unknown_Gastranaerophilaceae.2	infant_taxa_56__Unknown_Gastranaerophilaceae.2	Infant Fecal Microbiome (Taxa)	5-6 months	stool_microbiome_infant	0.00201789	0.00201789	0.212934	-0.0448292	0.470697	0.105052	Higher in SVN
infant_taxa_56	Unknown_Gastranaerophilaceae.3	infant_taxa_56__Unknown_Gastranaerophilaceae.3	Infant Fecal Microbiome (Taxa)	5-6 months	stool_microbiome_infant	0.00201789	0.00201789	0.212934	-0.0448292	0.470697	0.105052	Higher in SVN
infant_taxa_56	Unknown_Gastranaerophilaceae.4	infant_taxa_56__Unknown_Gastranaerophilaceae.4	Infant Fecal Microbiome (Taxa)	5-6 months	stool_microbiome_infant	0.00201789	0.00201789	0.212934	-0.0448292	0.470697	0.105052	Higher in SVN
infant_taxa_56	Unknown_Zag1	infant_taxa_56__Unknown_Zag1	Infant Fecal Microbiome (Taxa)	5-6 months	stool_microbiome_infant	0.00201789	0.00201789	0.212934	-0.0448292	0.470697	0.105052	Higher in SVN
infant_taxa_56	Unknown_Zag1.1	infant_taxa_56__Unknown_Zag1.1	Infant Fecal Microbiome (Taxa)	5-6 months	stool_microbiome_infant	0.00201789	0.00201789	0.212934	-0.0448292	0.470697	0.105052	Higher in SVN
infant_taxa_56	Unknown_Zag1.2	infant_taxa_56__Unknown_Zag1.2	Infant Fecal Microbiome (Taxa)	5-6 months	stool_microbiome_infant	0.00201789	0.00201789	0.212934	-0.0448292	0.470697	0.105052	Higher in SVN
infant_taxa_56	Unknown_Zag1.3	infant_taxa_56__Unknown_Zag1.3	Infant Fecal Microbiome (Taxa)	5-6 months	stool_microbiome_infant	0.00201789	0.00201789	0.212934	-0.0448292	0.470697	0.105052	Higher in SVN
infant_taxa_56	Unknown_Zag1.4	infant_taxa_56__Unknown_Zag1.4	Infant Fecal Microbiome (Taxa)	5-6 months	stool_microbiome_infant	0.00201789	0.00201789	0.212934	-0.0448292	0.470697	0.105052	Higher in SVN
infant_taxa_56	Unknown_Zag1.5	infant_taxa_56__Unknown_Zag1.5	Infant Fecal Microbiome (Taxa)	5-6 months	stool_microbiome_infant	0.00201789	0.00201789	0.212934	-0.0448292	0.470697	0.105052	Higher in SVN
infant_taxa_56	Unknown_Zag1.6	infant_taxa_56__Unknown_Zag1.6	Infant Fecal Microbiome (Taxa)	5-6 months	stool_microbiome_infant	0.00201789	0.00201789	0.212934	-0.0448292	0.470697	0.105052	Higher in SVN
infant_taxa_56	Unknown_Zag1.7	infant_taxa_56__Unknown_Zag1.7	Infant Fecal Microbiome (Taxa)	5-6 months	stool_microbiome_infant	0.00201789	0.00201789	0.212934	-0.0448292	0.470697	0.105052	Higher in SVN
infant_taxa_56	Unknown_Zag1.8	infant_taxa_56__Unknown_Zag1.8	Infant Fecal Microbiome (Taxa)	5-6 months	stool_microbiome_infant	0.00201789	0.00201789	0.212934	-0.0448292	0.470697	0.105052	Higher in SVN
infant_taxa_56	Unknown_Zag1.9	infant_taxa_56__Unknown_Zag1.9	Infant Fecal Microbiome (Taxa)	5-6 months	stool_microbiome_infant	0.00201789	0.00201789	0.212934	-0.0448292	0.470697	0.105052	Higher in SVN
infant_taxa_56	Zag1.sp001765415	infant_taxa_56__Zag1.sp001765415	Infant Fecal Microbiome (Taxa)	5-6 months	stool_microbiome_infant	0.00201789	0.00201789	0.212934	-0.0448292	0.470697	0.105052	Higher in SVN
infant_taxa_56	Zag1.sp900556295	infant_taxa_56__Zag1.sp900556295	Infant Fecal Microbiome (Taxa)	5-6 months	stool_microbiome_infant	0.00201789	0.00201789	0.212934	-0.0448292	0.470697	0.105052	Higher in SVN
infant_taxa_56	Unknown_Zag111	infant_taxa_56__Unknown_Zag111	Infant Fecal Microbiome (Taxa)	5-6 months	stool_microbiome_infant	0.00201789	0.00201789	0.212934	-0.0448292	0.470697	0.105052	Higher in SVN
infant_taxa_56	Unknown_Zag111.1	infant_taxa_56__Unknown_Zag111.1	Infant Fecal Microbiome (Taxa)	5-6 months	stool_microbiome_infant	0.00201789	0.00201789	0.212934	-0.0448292	0.470697	0.105052	Higher in SVN
infant_taxa_56	Unknown_Zag111.2	infant_taxa_56__Unknown_Zag111.2	Infant Fecal Microbiome (Taxa)	5-6 months	stool_microbiome_infant	0.00201789	0.00201789	0.212934	-0.0448292	0.470697	0.105052	Higher in SVN
infant_taxa_56	Zag111.sp002102825	infant_taxa_56__Zag111.sp002102825	Infant Fecal Microbiome (Taxa)	5-6 months	stool_microbiome_infant	0.00201789	0.00201789	0.212934	-0.0448292	0.470697	0.105052	Higher in SVN
infant_taxa_56	Zag111.sp002103105	infant_taxa_56__Zag111.sp002103105	Infant Fecal Microbiome (Taxa)	5-6 months	stool_microbiome_infant	0.00201789	0.00201789	0.212934	-0.0448292	0.470697	0.105052	Higher in SVN
infant_taxa_56	Zag111.sp003258735	infant_taxa_56__Zag111.sp003258735	Infant Fecal Microbiome (Taxa)	5-6 months	stool_microbiome_infant	0.00201789	0.00201789	0.212934	-0.0448292	0.470697	0.105052	Higher in SVN
infant_taxa_56	Zag111.sp004558955	infant_taxa_56__Zag111.sp004558955	Infant Fecal Microbiome (Taxa)	5-6 months	stool_microbiome_infant	0.00201789	0.00201789	0.212934	-0.0448292	0.470697	0.105052	Higher in SVN
infant_taxa_56	Unknown_Gastranaerophilales	infant_taxa_56__Unknown_Gastranaerophilales	Infant Fecal Microbiome (Taxa)	5-6 months	stool_microbiome_infant	0.00201789	0.00201789	0.212934	-0.0448292	0.470697	0.105052	Higher in SVN
infant_taxa_56	Unknown_Gastranaerophilales.1	infant_taxa_56__Unknown_Gastranaerophilales.1	Infant Fecal Microbiome (Taxa)	5-6 months	stool_microbiome_infant	0.00201789	0.00201789	0.212934	-0.0448292	0.470697	0.105052	Higher in SVN
infant_taxa_56	Unknown_Gastranaerophilales.2	infant_taxa_56__Unknown_Gastranaerophilales.2	Infant Fecal Microbiome (Taxa)	5-6 months	stool_microbiome_infant	0.00201789	0.00201789	0.212934	-0.0448292	0.470697	0.105052	Higher in SVN
infant_taxa_56	Bilophila.sp900553145	infant_taxa_56__Bilophila.sp900553145	Infant Fecal Microbiome (Taxa)	5-6 months	stool_microbiome_infant	0.00201789	0.00201789	0.212934	-0.0448292	0.470697	0.105052	Higher in SVN
infant_taxa_56	Unknown_Bilophila.1	infant_taxa_56__Unknown_Bilophila.1	Infant Fecal Microbiome (Taxa)	5-6 months	stool_microbiome_infant	0.00201789	0.00201789	-0.0762169	-0.335028	0.182594	0.562601	Lower in SVN
infant_taxa_56	Desulfovibrio.fairfieldensis	infant_taxa_56__Desulfovibrio.fairfieldensis	Infant Fecal Microbiome (Taxa)	5-6 months	stool_microbiome_infant	0.00201789	0.00201789	-0.074086	-0.332905	0.184733	0.573581	Lower in SVN
infant_taxa_56	Desulfovibrio.piger	infant_taxa_56__Desulfovibrio.piger	Infant Fecal Microbiome (Taxa)	5-6 months	stool_microbiome_infant	0.00201789	0.00201789	0.212934	-0.0448292	0.470697	0.105052	Higher in SVN
infant_taxa_56	Desulfovibrio.piger_A	infant_taxa_56__Desulfovibrio.piger_A	Infant Fecal Microbiome (Taxa)	5-6 months	stool_microbiome_infant	0.00201789	0.00201789	0.212934	-0.0448292	0.470697	0.105052	Higher in SVN
infant_taxa_56	Desulfovibrio.sp900319575	infant_taxa_56__Desulfovibrio.sp900319575	Infant Fecal Microbiome (Taxa)	5-6 months	stool_microbiome_infant	0.00201789	0.00201789	0.212934	-0.0448292	0.470697	0.105052	Higher in SVN
infant_taxa_56	Desulfovibrio.sp900540515	infant_taxa_56__Desulfovibrio.sp900540515	Infant Fecal Microbiome (Taxa)	5-6 months	stool_microbiome_infant	0.00201789	0.00201789	0.212934	-0.0448292	0.470697	0.105052	Higher in SVN
infant_taxa_56	Unknown_Desulfovibrio	infant_taxa_56__Unknown_Desulfovibrio	Infant Fecal Microbiome (Taxa)	5-6 months	stool_microbiome_infant	0.00201789	0.00201789	0.212934	-0.0448292	0.470697	0.105052	Higher in SVN
infant_taxa_56	Unknown_Desulfovibrio.1	infant_taxa_56__Unknown_Desulfovibrio.1	Infant Fecal Microbiome (Taxa)	5-6 months	stool_microbiome_infant	0.00201789	0.00201789	0.212934	-0.0448292	0.470697	0.105052	Higher in SVN
infant_taxa_56	Mailhella.sp003150275	infant_taxa_56__Mailhella.sp003150275	Infant Fecal Microbiome (Taxa)	5-6 months	stool_microbiome_infant	0.00201789	0.00201789	0.212934	-0.0448292	0.470697	0.105052	Higher in SVN
infant_taxa_56	UBA1174.sp900556855	infant_taxa_56__UBA1174.sp900556855	Infant Fecal Microbiome (Taxa)	5-6 months	stool_microbiome_infant	0.00201789	0.00201789	0.212934	-0.0448292	0.470697	0.105052	Higher in SVN
infant_taxa_56	UBA1436.sp002329395	infant_taxa_56__UBA1436.sp002329395	Infant Fecal Microbiome (Taxa)	5-6 months	stool_microbiome_infant	0.00201789	0.00201789	0.212934	-0.0448292	0.470697	0.105052	Higher in SVN
infant_taxa_56	UBA1436.sp900540405	infant_taxa_56__UBA1436.sp900540405	Infant Fecal Microbiome (Taxa)	5-6 months	stool_microbiome_infant	0.00201789	0.00201789	0.212934	-0.0448292	0.470697	0.105052	Higher in SVN
infant_taxa_56	UBA1436.sp900541355	infant_taxa_56__UBA1436.sp900541355	Infant Fecal Microbiome (Taxa)	5-6 months	stool_microbiome_infant	0.00201789	0.00201789	0.212934	-0.0448292	0.470697	0.105052	Higher in SVN
infant_taxa_56	Unknown_UBA1436	infant_taxa_56__Unknown_UBA1436	Infant Fecal Microbiome (Taxa)	5-6 months	stool_microbiome_infant	0.00201789	0.00201789	0.212934	-0.0448292	0.470697	0.105052	Higher in SVN
infant_taxa_56	Unknown_UBA1436.1	infant_taxa_56__Unknown_UBA1436.1	Infant Fecal Microbiome (Taxa)	5-6 months	stool_microbiome_infant	0.00201789	0.00201789	0.212934	-0.0448292	0.470697	0.105052	Higher in SVN
infant_taxa_56	Unknown_UBA1436.2	infant_taxa_56__Unknown_UBA1436.2	Infant Fecal Microbiome (Taxa)	5-6 months	stool_microbiome_infant	0.00201789	0.00201789	0.212934	-0.0448292	0.470697	0.105052	Higher in SVN
infant_taxa_56	Unknown_Elusimicrobiaceae	infant_taxa_56__Unknown_Elusimicrobiaceae	Infant Fecal Microbiome (Taxa)	5-6 months	stool_microbiome_infant	0.00201789	0.00201789	0.212934	-0.0448292	0.470697	0.105052	Higher in SVN
infant_taxa_56	UBA4705.sp004554425	infant_taxa_56__UBA4705.sp004554425	Infant Fecal Microbiome (Taxa)	5-6 months	stool_microbiome_infant	0.00201789	0.00201789	0.212934	-0.0448292	0.470697	0.105052	Higher in SVN
infant_taxa_56	Unknown_Fibrobacteraceae	infant_taxa_56__Unknown_Fibrobacteraceae	Infant Fecal Microbiome (Taxa)	5-6 months	stool_microbiome_infant	0.00201789	0.00201789	0.212934	-0.0448292	0.470697	0.105052	Higher in SVN
infant_taxa_56	CAG.307.sp001916215	infant_taxa_56__CAG.307.sp001916215	Infant Fecal Microbiome (Taxa)	5-6 months	stool_microbiome_infant	0.00201789	0.00201789	0.212934	-0.0448292	0.470697	0.105052	Higher in SVN
infant_taxa_56	Unknown_Anaeroplasmataceae	infant_taxa_56__Unknown_Anaeroplasmataceae	Infant Fecal Microbiome (Taxa)	5-6 months	stool_microbiome_infant	0.00201789	0.00201789	0.212934	-0.0448292	0.470697	0.105052	Higher in SVN
infant_taxa_56	Unknown_Anaeroplasmataceae.1	infant_taxa_56__Unknown_Anaeroplasmataceae.1	Infant Fecal Microbiome (Taxa)	5-6 months	stool_microbiome_infant	0.00201789	0.00201789	0.212934	-0.0448292	0.470697	0.105052	Higher in SVN
infant_taxa_56	Unknown_Anaeroplasmataceae.2	infant_taxa_56__Unknown_Anaeroplasmataceae.2	Infant Fecal Microbiome (Taxa)	5-6 months	stool_microbiome_infant	0.00201789	0.00201789	0.212934	-0.0448292	0.470697	0.105052	Higher in SVN
infant_taxa_56	Bacillus.subtilis	infant_taxa_56__Bacillus.subtilis	Infant Fecal Microbiome (Taxa)	5-6 months	stool_microbiome_infant	0.00201789	0.00201789	0.212934	-0.0448292	0.470697	0.105052	Higher in SVN
infant_taxa_56	Beduini.sp900550005	infant_taxa_56__Beduini.sp900550005	Infant Fecal Microbiome (Taxa)	5-6 months	stool_microbiome_infant	0.00201789	0.00201789	0.212934	-0.0448292	0.470697	0.105052	Higher in SVN
infant_taxa_56	Catenibacterium.mitsuokai	infant_taxa_56__Catenibacterium.mitsuokai	Infant Fecal Microbiome (Taxa)	5-6 months	stool_microbiome_infant	0.00201789	0.00201789	0.212934	-0.0448292	0.470697	0.105052	Higher in SVN
infant_taxa_56	Catenibacterium.sp000437715	infant_taxa_56__Catenibacterium.sp000437715	Infant Fecal Microbiome (Taxa)	5-6 months	stool_microbiome_infant	0.00201789	0.00201789	0.212934	-0.0448292	0.470697	0.105052	Higher in SVN
infant_taxa_56	Catenibacterium.sp900540685	infant_taxa_56__Catenibacterium.sp900540685	Infant Fecal Microbiome (Taxa)	5-6 months	stool_microbiome_infant	0.00201789	0.00201789	0.212934	-0.0448292	0.470697	0.105052	Higher in SVN
infant_taxa_56	Unknown_Catenibacterium	infant_taxa_56__Unknown_Catenibacterium	Infant Fecal Microbiome (Taxa)	5-6 months	stool_microbiome_infant	0.00201789	0.00201789	0.212934	-0.0448292	0.470697	0.105052	Higher in SVN
infant_taxa_56	Coprobacillus.cateniformis	infant_taxa_56__Coprobacillus.cateniformis	Infant Fecal Microbiome (Taxa)	5-6 months	stool_microbiome_infant	0.00201789	0.00201789	0.212934	-0.0448292	0.470697	0.105052	Higher in SVN
infant_taxa_56	Erysipelatoclostridium.sp000752095	infant_taxa_56__Erysipelatoclostridium.sp000752095	Infant Fecal Microbiome (Taxa)	5-6 months	stool_microbiome_infant	0.00201789	0.00201789	0.212934	-0.0448292	0.470697	0.105052	Higher in SVN
infant_taxa_56	Erysipelatoclostridium.sp002160495	infant_taxa_56__Erysipelatoclostridium.sp002160495	Infant Fecal Microbiome (Taxa)	5-6 months	stool_microbiome_infant	0.00201789	0.00201789	0.212934	-0.0448292	0.470697	0.105052	Higher in SVN
infant_taxa_56	Erysipelatoclostridium.sp003024675	infant_taxa_56__Erysipelatoclostridium.sp003024675	Infant Fecal Microbiome (Taxa)	5-6 months	stool_microbiome_infant	0.00201789	0.00201789	0.212934	-0.0448292	0.470697	0.105052	Higher in SVN
infant_taxa_56	Erysipelatoclostridium.sp900544435	infant_taxa_56__Erysipelatoclostridium.sp900544435	Infant Fecal Microbiome (Taxa)	5-6 months	stool_microbiome_infant	0.00201789	0.00201789	0.212934	-0.0448292	0.470697	0.105052	Higher in SVN
infant_taxa_56	Massiliomicrobiota.sp002160815	infant_taxa_56__Massiliomicrobiota.sp002160815	Infant Fecal Microbiome (Taxa)	5-6 months	stool_microbiome_infant	0.00201789	0.00201789	0.212934	-0.0448292	0.470697	0.105052	Higher in SVN
infant_taxa_56	Bulleidia.moorei	infant_taxa_56__Bulleidia.moorei	Infant Fecal Microbiome (Taxa)	5-6 months	stool_microbiome_infant	0.00201789	0.00201789	0.212934	-0.0448292	0.470697	0.105052	Higher in SVN
infant_taxa_56	Bulleidia.sp900539965	infant_taxa_56__Bulleidia.sp900539965	Infant Fecal Microbiome (Taxa)	5-6 months	stool_microbiome_infant	0.00201789	0.00201789	0.212934	-0.0448292	0.470697	0.105052	Higher in SVN
infant_taxa_56	Unknown_Bulleidia	infant_taxa_56__Unknown_Bulleidia	Infant Fecal Microbiome (Taxa)	5-6 months	stool_microbiome_infant	0.00201789	0.00201789	0.212934	-0.0448292	0.470697	0.105052	Higher in SVN
infant_taxa_56	Unknown_Bulleidia.1	infant_taxa_56__Unknown_Bulleidia.1	Infant Fecal Microbiome (Taxa)	5-6 months	stool_microbiome_infant	0.00201789	0.00201789	0.212934	-0.0448292	0.470697	0.105052	Higher in SVN
infant_taxa_56	Unknown_Bulleidia.2	infant_taxa_56__Unknown_Bulleidia.2	Infant Fecal Microbiome (Taxa)	5-6 months	stool_microbiome_infant	0.00201789	0.00201789	0.212934	-0.0448292	0.470697	0.105052	Higher in SVN
infant_taxa_56	Faecalicoccus.pleomorphus	infant_taxa_56__Faecalicoccus.pleomorphus	Infant Fecal Microbiome (Taxa)	5-6 months	stool_microbiome_infant	0.00201789	0.00201789	0.212934	-0.0448292	0.470697	0.105052	Higher in SVN
infant_taxa_56	Faecalicoccus.sp900546545	infant_taxa_56__Faecalicoccus.sp900546545	Infant Fecal Microbiome (Taxa)	5-6 months	stool_microbiome_infant	0.00201789	0.00201789	-0.0756534	-0.334467	0.18316	0.565494	Lower in SVN
infant_taxa_56	Holdemanella.biformis	infant_taxa_56__Holdemanella.biformis	Infant Fecal Microbiome (Taxa)	5-6 months	stool_microbiome_infant	0.00201789	0.00201789	0.212934	-0.0448292	0.470697	0.105052	Higher in SVN
infant_taxa_56	Holdemanella.sp002299315	infant_taxa_56__Holdemanella.sp002299315	Infant Fecal Microbiome (Taxa)	5-6 months	stool_microbiome_infant	0.00201789	0.00201789	0.212934	-0.0448292	0.470697	0.105052	Higher in SVN
infant_taxa_56	Holdemanella.sp003436425	infant_taxa_56__Holdemanella.sp003436425	Infant Fecal Microbiome (Taxa)	5-6 months	stool_microbiome_infant	0.00201789	0.00201789	0.212934	-0.0448292	0.470697	0.105052	Higher in SVN
infant_taxa_56	Holdemanella.sp003458715	infant_taxa_56__Holdemanella.sp003458715	Infant Fecal Microbiome (Taxa)	5-6 months	stool_microbiome_infant	0.00201789	0.00201789	0.212934	-0.0448292	0.470697	0.105052	Higher in SVN
infant_taxa_56	Holdemanella.sp900547815	infant_taxa_56__Holdemanella.sp900547815	Infant Fecal Microbiome (Taxa)	5-6 months	stool_microbiome_infant	0.00201789	0.00201789	0.212934	-0.0448292	0.470697	0.105052	Higher in SVN
infant_taxa_56	Unknown_Holdemanella	infant_taxa_56__Unknown_Holdemanella	Infant Fecal Microbiome (Taxa)	5-6 months	stool_microbiome_infant	0.00201789	0.00201789	0.212934	-0.0448292	0.470697	0.105052	Higher in SVN
infant_taxa_56	Unknown_Holdemanella.1	infant_taxa_56__Unknown_Holdemanella.1	Infant Fecal Microbiome (Taxa)	5-6 months	stool_microbiome_infant	0.00201789	0.00201789	0.212934	-0.0448292	0.470697	0.105052	Higher in SVN
infant_taxa_56	Unknown_Holdemanella.2	infant_taxa_56__Unknown_Holdemanella.2	Infant Fecal Microbiome (Taxa)	5-6 months	stool_microbiome_infant	0.00201789	0.00201789	0.212934	-0.0448292	0.470697	0.105052	Higher in SVN
infant_taxa_56	Holdemania.filiformis	infant_taxa_56__Holdemania.filiformis	Infant Fecal Microbiome (Taxa)	5-6 months	stool_microbiome_infant	0.00201789	0.00201789	0.212934	-0.0448292	0.470697	0.105052	Higher in SVN
infant_taxa_56	Holdemania.massiliensis	infant_taxa_56__Holdemania.massiliensis	Infant Fecal Microbiome (Taxa)	5-6 months	stool_microbiome_infant	0.00201789	0.00201789	0.212934	-0.0448292	0.470697	0.105052	Higher in SVN
infant_taxa_56	Longicatena.innocuum	infant_taxa_56__Longicatena.innocuum	Infant Fecal Microbiome (Taxa)	5-6 months	stool_microbiome_infant	0.00201789	0.00201789	0.212934	-0.0448292	0.470697	0.105052	Higher in SVN
infant_taxa_56	Unknown_Merdibacter	infant_taxa_56__Unknown_Merdibacter	Infant Fecal Microbiome (Taxa)	5-6 months	stool_microbiome_infant	0.00201789	0.00201789	0.212934	-0.0448292	0.470697	0.105052	Higher in SVN
infant_taxa_56	UBA636.sp900546285	infant_taxa_56__UBA636.sp900546285	Infant Fecal Microbiome (Taxa)	5-6 months	stool_microbiome_infant	0.00201789	0.00201789	0.212934	-0.0448292	0.470697	0.105052	Higher in SVN
infant_taxa_56	Unknown_UBA636	infant_taxa_56__Unknown_UBA636	Infant Fecal Microbiome (Taxa)	5-6 months	stool_microbiome_infant	0.00201789	0.00201789	0.212934	-0.0448292	0.470697	0.105052	Higher in SVN
infant_taxa_56	Unknown_UBA636.1	infant_taxa_56__Unknown_UBA636.1	Infant Fecal Microbiome (Taxa)	5-6 months	stool_microbiome_infant	0.00201789	0.00201789	0.212934	-0.0448292	0.470697	0.105052	Higher in SVN
infant_taxa_56	Turicibacter.sanguinis	infant_taxa_56__Turicibacter.sanguinis	Infant Fecal Microbiome (Taxa)	5-6 months	stool_microbiome_infant	0.00201789	0.00201789	0.212934	-0.0448292	0.470697	0.105052	Higher in SVN
infant_taxa_56	Turicibacter.sp001543345	infant_taxa_56__Turicibacter.sp001543345	Infant Fecal Microbiome (Taxa)	5-6 months	stool_microbiome_infant	0.00201789	0.00201789	0.212934	-0.0448292	0.470697	0.105052	Higher in SVN
infant_taxa_56	Enterococcus_C.asini	infant_taxa_56__Enterococcus_C.asini	Infant Fecal Microbiome (Taxa)	5-6 months	stool_microbiome_infant	0.00201789	0.00201789	0.212934	-0.0448292	0.470697	0.105052	Higher in SVN
infant_taxa_56	Enterococcus_D.casseliflavus	infant_taxa_56__Enterococcus_D.casseliflavus	Infant Fecal Microbiome (Taxa)	5-6 months	stool_microbiome_infant	0.00201789	0.00201789	-0.0747778	-0.333594	0.184039	0.570005	Lower in SVN
infant_taxa_56	Lacticaseibacillus.paracasei	infant_taxa_56__Lacticaseibacillus.paracasei	Infant Fecal Microbiome (Taxa)	5-6 months	stool_microbiome_infant	0.00201789	0.00201789	0.212934	-0.0448292	0.470697	0.105052	Higher in SVN
infant_taxa_56	Lacticaseibacillus.rhamnosus	infant_taxa_56__Lacticaseibacillus.rhamnosus	Infant Fecal Microbiome (Taxa)	5-6 months	stool_microbiome_infant	0.00201789	0.00201789	0.212934	-0.0448292	0.470697	0.105052	Higher in SVN
infant_taxa_56	Lactobacillus.amylovorus	infant_taxa_56__Lactobacillus.amylovorus	Infant Fecal Microbiome (Taxa)	5-6 months	stool_microbiome_infant	0.00201789	0.00201789	0.212934	-0.0448292	0.470697	0.105052	Higher in SVN
infant_taxa_56	Lactobacillus.delbrueckii	infant_taxa_56__Lactobacillus.delbrueckii	Infant Fecal Microbiome (Taxa)	5-6 months	stool_microbiome_infant	0.00201789	0.00201789	0.212934	-0.0448292	0.470697	0.105052	Higher in SVN
infant_taxa_56	Lactobacillus.iners	infant_taxa_56__Lactobacillus.iners	Infant Fecal Microbiome (Taxa)	5-6 months	stool_microbiome_infant	0.00201789	0.00201789	0.212934	-0.0448292	0.470697	0.105052	Higher in SVN
infant_taxa_56	Leuconostoc.sp900554745	infant_taxa_56__Leuconostoc.sp900554745	Infant Fecal Microbiome (Taxa)	5-6 months	stool_microbiome_infant	0.00201789	0.00201789	0.212934	-0.0448292	0.470697	0.105052	Higher in SVN
infant_taxa_56	Ligilactobacillus.agilis	infant_taxa_56__Ligilactobacillus.agilis	Infant Fecal Microbiome (Taxa)	5-6 months	stool_microbiome_infant	0.00201789	0.00201789	0.212934	-0.0448292	0.470697	0.105052	Higher in SVN
infant_taxa_56	Ligilactobacillus.salivarius	infant_taxa_56__Ligilactobacillus.salivarius	Infant Fecal Microbiome (Taxa)	5-6 months	stool_microbiome_infant	0.00201789	0.00201789	0.212934	-0.0448292	0.470697	0.105052	Higher in SVN
infant_taxa_56	Limosilactobacillus.pontis	infant_taxa_56__Limosilactobacillus.pontis	Infant Fecal Microbiome (Taxa)	5-6 months	stool_microbiome_infant	0.00201789	0.00201789	0.212934	-0.0448292	0.470697	0.105052	Higher in SVN
infant_taxa_56	Limosilactobacillus.reuteri	infant_taxa_56__Limosilactobacillus.reuteri	Infant Fecal Microbiome (Taxa)	5-6 months	stool_microbiome_infant	0.00201789	0.00201789	0.212934	-0.0448292	0.470697	0.105052	Higher in SVN
infant_taxa_56	Limosilactobacillus.sp900557215	infant_taxa_56__Limosilactobacillus.sp900557215	Infant Fecal Microbiome (Taxa)	5-6 months	stool_microbiome_infant	0.00201789	0.00201789	0.212934	-0.0448292	0.470697	0.105052	Higher in SVN
infant_taxa_56	Pediococcus.acidilactici	infant_taxa_56__Pediococcus.acidilactici	Infant Fecal Microbiome (Taxa)	5-6 months	stool_microbiome_infant	0.00201789	0.00201789	0.212934	-0.0448292	0.470697	0.105052	Higher in SVN
infant_taxa_56	Schleiferilactobacillus.harbinensis	infant_taxa_56__Schleiferilactobacillus.harbinensis	Infant Fecal Microbiome (Taxa)	5-6 months	stool_microbiome_infant	0.00201789	0.00201789	0.212934	-0.0448292	0.470697	0.105052	Higher in SVN
infant_taxa_56	Weissella.cibaria	infant_taxa_56__Weissella.cibaria	Infant Fecal Microbiome (Taxa)	5-6 months	stool_microbiome_infant	0.00201789	0.00201789	0.212934	-0.0448292	0.470697	0.105052	Higher in SVN
infant_taxa_56	Weissella.confusa	infant_taxa_56__Weissella.confusa	Infant Fecal Microbiome (Taxa)	5-6 months	stool_microbiome_infant	0.00201789	0.00201789	-0.0739865	-0.332806	0.184833	0.574095	Lower in SVN
infant_taxa_56	Lactococcus.garvieae_B	infant_taxa_56__Lactococcus.garvieae_B	Infant Fecal Microbiome (Taxa)	5-6 months	stool_microbiome_infant	0.00201789	0.00201789	0.212934	-0.0448292	0.470697	0.105052	Higher in SVN
infant_taxa_56	Lactococcus.lactis	infant_taxa_56__Lactococcus.lactis	Infant Fecal Microbiome (Taxa)	5-6 months	stool_microbiome_infant	0.00201789	0.00201789	0.212934	-0.0448292	0.470697	0.105052	Higher in SVN
infant_taxa_56	Lactococcus.lactis_A	infant_taxa_56__Lactococcus.lactis_A	Infant Fecal Microbiome (Taxa)	5-6 months	stool_microbiome_infant	0.00201789	0.00201789	0.212934	-0.0448292	0.470697	0.105052	Higher in SVN
infant_taxa_56	Lactococcus.petauri	infant_taxa_56__Lactococcus.petauri	Infant Fecal Microbiome (Taxa)	5-6 months	stool_microbiome_infant	0.00201789	0.00201789	0.212934	-0.0448292	0.470697	0.105052	Higher in SVN
infant_taxa_56	Streptococcus.anginosus	infant_taxa_56__Streptococcus.anginosus	Infant Fecal Microbiome (Taxa)	5-6 months	stool_microbiome_infant	0.00201789	0.00201789	0.212934	-0.0448292	0.470697	0.105052	Higher in SVN
infant_taxa_56	Streptococcus.anginosus_C	infant_taxa_56__Streptococcus.anginosus_C	Infant Fecal Microbiome (Taxa)	5-6 months	stool_microbiome_infant	0.00201789	0.00201789	0.212934	-0.0448292	0.470697	0.105052	Higher in SVN
infant_taxa_56	Streptococcus.constellatus	infant_taxa_56__Streptococcus.constellatus	Infant Fecal Microbiome (Taxa)	5-6 months	stool_microbiome_infant	0.00201789	0.00201789	0.212934	-0.0448292	0.470697	0.105052	Higher in SVN
infant_taxa_56	Streptococcus.gordonii	infant_taxa_56__Streptococcus.gordonii	Infant Fecal Microbiome (Taxa)	5-6 months	stool_microbiome_infant	0.00201789	0.00201789	0.212934	-0.0448292	0.470697	0.105052	Higher in SVN
infant_taxa_56	Streptococcus.mutans	infant_taxa_56__Streptococcus.mutans	Infant Fecal Microbiome (Taxa)	5-6 months	stool_microbiome_infant	0.00201789	0.00201789	0.212934	-0.0448292	0.470697	0.105052	Higher in SVN
infant_taxa_56	Streptococcus.parasanguinis	infant_taxa_56__Streptococcus.parasanguinis	Infant Fecal Microbiome (Taxa)	5-6 months	stool_microbiome_infant	0.00201789	0.00201789	0.212934	-0.0448292	0.470697	0.105052	Higher in SVN
infant_taxa_56	Streptococcus.parasanguinis_B	infant_taxa_56__Streptococcus.parasanguinis_B	Infant Fecal Microbiome (Taxa)	5-6 months	stool_microbiome_infant	0.00201789	0.00201789	0.212934	-0.0448292	0.470697	0.105052	Higher in SVN
infant_taxa_56	Streptococcus.rubneri	infant_taxa_56__Streptococcus.rubneri	Infant Fecal Microbiome (Taxa)	5-6 months	stool_microbiome_infant	0.00201789	0.00201789	0.212934	-0.0448292	0.470697	0.105052	Higher in SVN
infant_taxa_56	Streptococcus.sp001556435	infant_taxa_56__Streptococcus.sp001556435	Infant Fecal Microbiome (Taxa)	5-6 months	stool_microbiome_infant	0.00201789	0.00201789	0.212934	-0.0448292	0.470697	0.105052	Higher in SVN
infant_taxa_56	Streptococcus.sp002300045	infant_taxa_56__Streptococcus.sp002300045	Infant Fecal Microbiome (Taxa)	5-6 months	stool_microbiome_infant	0.00201789	0.00201789	0.212934	-0.0448292	0.470697	0.105052	Higher in SVN
infant_taxa_56	Streptococcus.sp004166885	infant_taxa_56__Streptococcus.sp004166885	Infant Fecal Microbiome (Taxa)	5-6 months	stool_microbiome_infant	0.00201789	0.00201789	0.212934	-0.0448292	0.470697	0.105052	Higher in SVN
infant_taxa_56	Streptococcus.thermophilus	infant_taxa_56__Streptococcus.thermophilus	Infant Fecal Microbiome (Taxa)	5-6 months	stool_microbiome_infant	0.00201789	0.00201789	-0.0756153	-0.334429	0.183198	0.56569	Lower in SVN
infant_taxa_56	Streptococcus.vestibularis	infant_taxa_56__Streptococcus.vestibularis	Infant Fecal Microbiome (Taxa)	5-6 months	stool_microbiome_infant	0.00201789	0.00201789	0.212934	-0.0448292	0.470697	0.105052	Higher in SVN
infant_taxa_56	Unknown_Streptococcus	infant_taxa_56__Unknown_Streptococcus	Infant Fecal Microbiome (Taxa)	5-6 months	stool_microbiome_infant	0.00201789	0.00201789	0.212934	-0.0448292	0.470697	0.105052	Higher in SVN
infant_taxa_56	Unknown_Streptococcus.2	infant_taxa_56__Unknown_Streptococcus.2	Infant Fecal Microbiome (Taxa)	5-6 months	stool_microbiome_infant	0.00201789	0.00201789	0.212934	-0.0448292	0.470697	0.105052	Higher in SVN
infant_taxa_56	Unknown_Streptococcus.3	infant_taxa_56__Unknown_Streptococcus.3	Infant Fecal Microbiome (Taxa)	5-6 months	stool_microbiome_infant	0.00201789	0.00201789	0.212934	-0.0448292	0.470697	0.105052	Higher in SVN
infant_taxa_56	Unknown_Streptococcus.4	infant_taxa_56__Unknown_Streptococcus.4	Infant Fecal Microbiome (Taxa)	5-6 months	stool_microbiome_infant	0.00201789	0.00201789	0.212934	-0.0448292	0.470697	0.105052	Higher in SVN
infant_taxa_56	CAG.313.sp003539625	infant_taxa_56__CAG.313.sp003539625	Infant Fecal Microbiome (Taxa)	5-6 months	stool_microbiome_infant	0.00201789	0.00201789	0.212934	-0.0448292	0.470697	0.105052	Higher in SVN
infant_taxa_56	Unknown_UBA1737	infant_taxa_56__Unknown_UBA1737	Infant Fecal Microbiome (Taxa)	5-6 months	stool_microbiome_infant	0.00201789	0.00201789	0.212934	-0.0448292	0.470697	0.105052	Higher in SVN
infant_taxa_56	UMGS75.sp900538885	infant_taxa_56__UMGS75.sp900538885	Infant Fecal Microbiome (Taxa)	5-6 months	stool_microbiome_infant	0.00201789	0.00201789	0.212934	-0.0448292	0.470697	0.105052	Higher in SVN
infant_taxa_56	Unknown_UMGS75	infant_taxa_56__Unknown_UMGS75	Infant Fecal Microbiome (Taxa)	5-6 months	stool_microbiome_infant	0.00201789	0.00201789	0.212934	-0.0448292	0.470697	0.105052	Higher in SVN
infant_taxa_56	Unknown_UMGS75.1	infant_taxa_56__Unknown_UMGS75.1	Infant Fecal Microbiome (Taxa)	5-6 months	stool_microbiome_infant	0.00201789	0.00201789	0.212934	-0.0448292	0.470697	0.105052	Higher in SVN
infant_taxa_56	CAG.698.sp000431235	infant_taxa_56__CAG.698.sp000431235	Infant Fecal Microbiome (Taxa)	5-6 months	stool_microbiome_infant	0.00201789	0.00201789	0.212934	-0.0448292	0.470697	0.105052	Higher in SVN
infant_taxa_56	Tener.01.sp001940985	infant_taxa_56__Tener.01.sp001940985	Infant Fecal Microbiome (Taxa)	5-6 months	stool_microbiome_infant	0.00201789	0.00201789	0.212934	-0.0448292	0.470697	0.105052	Higher in SVN
infant_taxa_56	Unknown_CAG.698	infant_taxa_56__Unknown_CAG.698	Infant Fecal Microbiome (Taxa)	5-6 months	stool_microbiome_infant	0.00201789	0.00201789	0.212934	-0.0448292	0.470697	0.105052	Higher in SVN
infant_taxa_56	Ureaplasma.sp900544585	infant_taxa_56__Ureaplasma.sp900544585	Infant Fecal Microbiome (Taxa)	5-6 months	stool_microbiome_infant	0.00201789	0.00201789	-0.140015	-0.398461	0.11843	0.287156	Lower in SVN
infant_taxa_56	CAG.1000.sp000434555	infant_taxa_56__CAG.1000.sp000434555	Infant Fecal Microbiome (Taxa)	5-6 months	stool_microbiome_infant	0.00201789	0.00201789	0.212934	-0.0448292	0.470697	0.105052	Higher in SVN
infant_taxa_56	CAG.1000.sp000436975	infant_taxa_56__CAG.1000.sp000436975	Infant Fecal Microbiome (Taxa)	5-6 months	stool_microbiome_infant	0.00201789	0.00201789	0.212934	-0.0448292	0.470697	0.105052	Higher in SVN
infant_taxa_56	CAG.1000.sp004560915	infant_taxa_56__CAG.1000.sp004560915	Infant Fecal Microbiome (Taxa)	5-6 months	stool_microbiome_infant	0.00201789	0.00201789	0.212934	-0.0448292	0.470697	0.105052	Higher in SVN
infant_taxa_56	CAG.1000.sp900556025	infant_taxa_56__CAG.1000.sp900556025	Infant Fecal Microbiome (Taxa)	5-6 months	stool_microbiome_infant	0.00201789	0.00201789	0.212934	-0.0448292	0.470697	0.105052	Higher in SVN
infant_taxa_56	Unknown_CAG.1000_1	infant_taxa_56__Unknown_CAG.1000_1	Infant Fecal Microbiome (Taxa)	5-6 months	stool_microbiome_infant	0.00201789	0.00201789	0.212934	-0.0448292	0.470697	0.105052	Higher in SVN
infant_taxa_56	Unknown_CAG.1000_1.1	infant_taxa_56__Unknown_CAG.1000_1.1	Infant Fecal Microbiome (Taxa)	5-6 months	stool_microbiome_infant	0.00201789	0.00201789	0.212934	-0.0448292	0.470697	0.105052	Higher in SVN
infant_taxa_56	Unknown_CAG.1000_1.2	infant_taxa_56__Unknown_CAG.1000_1.2	Infant Fecal Microbiome (Taxa)	5-6 months	stool_microbiome_infant	0.00201789	0.00201789	0.212934	-0.0448292	0.470697	0.105052	Higher in SVN
infant_taxa_56	Unknown_CAG.1000_1.3	infant_taxa_56__Unknown_CAG.1000_1.3	Infant Fecal Microbiome (Taxa)	5-6 months	stool_microbiome_infant	0.00201789	0.00201789	0.212934	-0.0448292	0.470697	0.105052	Higher in SVN
infant_taxa_56	Unknown_CAG.1000_1.4	infant_taxa_56__Unknown_CAG.1000_1.4	Infant Fecal Microbiome (Taxa)	5-6 months	stool_microbiome_infant	0.00201789	0.00201789	0.212934	-0.0448292	0.470697	0.105052	Higher in SVN
infant_taxa_56	Unknown_CAG.1000_1.5	infant_taxa_56__Unknown_CAG.1000_1.5	Infant Fecal Microbiome (Taxa)	5-6 months	stool_microbiome_infant	0.00201789	0.00201789	0.212934	-0.0448292	0.470697	0.105052	Higher in SVN
infant_taxa_56	Unknown_CAG.1000_1.6	infant_taxa_56__Unknown_CAG.1000_1.6	Infant Fecal Microbiome (Taxa)	5-6 months	stool_microbiome_infant	0.00201789	0.00201789	0.212934	-0.0448292	0.470697	0.105052	Higher in SVN
infant_taxa_56	Unknown_CAG.1000_1.7	infant_taxa_56__Unknown_CAG.1000_1.7	Infant Fecal Microbiome (Taxa)	5-6 months	stool_microbiome_infant	0.00201789	0.00201789	0.212934	-0.0448292	0.470697	0.105052	Higher in SVN
infant_taxa_56	Unknown_CAG.1000_1.8	infant_taxa_56__Unknown_CAG.1000_1.8	Infant Fecal Microbiome (Taxa)	5-6 months	stool_microbiome_infant	0.00201789	0.00201789	0.212934	-0.0448292	0.470697	0.105052	Higher in SVN
infant_taxa_56	Unknown_CAG.1000_1.9	infant_taxa_56__Unknown_CAG.1000_1.9	Infant Fecal Microbiome (Taxa)	5-6 months	stool_microbiome_infant	0.00201789	0.00201789	0.212934	-0.0448292	0.470697	0.105052	Higher in SVN
infant_taxa_56	Unknown_CAG.1000_1.10	infant_taxa_56__Unknown_CAG.1000_1.10	Infant Fecal Microbiome (Taxa)	5-6 months	stool_microbiome_infant	0.00201789	0.00201789	0.212934	-0.0448292	0.470697	0.105052	Higher in SVN
infant_taxa_56	CAG.460.sp000437315	infant_taxa_56__CAG.460.sp000437315	Infant Fecal Microbiome (Taxa)	5-6 months	stool_microbiome_infant	0.00201789	0.00201789	0.212934	-0.0448292	0.470697	0.105052	Higher in SVN
infant_taxa_56	CAG.460.sp000437355	infant_taxa_56__CAG.460.sp000437355	Infant Fecal Microbiome (Taxa)	5-6 months	stool_microbiome_infant	0.00201789	0.00201789	0.212934	-0.0448292	0.470697	0.105052	Higher in SVN
infant_taxa_56	CAG.460.sp000438075	infant_taxa_56__CAG.460.sp000438075	Infant Fecal Microbiome (Taxa)	5-6 months	stool_microbiome_infant	0.00201789	0.00201789	0.212934	-0.0448292	0.470697	0.105052	Higher in SVN
infant_taxa_56	CAG.460.sp900544625	infant_taxa_56__CAG.460.sp900544625	Infant Fecal Microbiome (Taxa)	5-6 months	stool_microbiome_infant	0.00201789	0.00201789	0.212934	-0.0448292	0.470697	0.105052	Higher in SVN
infant_taxa_56	CAG.460.sp900551525	infant_taxa_56__CAG.460.sp900551525	Infant Fecal Microbiome (Taxa)	5-6 months	stool_microbiome_infant	0.00201789	0.00201789	0.212934	-0.0448292	0.470697	0.105052	Higher in SVN
infant_taxa_56	Unknown_CAG.460	infant_taxa_56__Unknown_CAG.460	Infant Fecal Microbiome (Taxa)	5-6 months	stool_microbiome_infant	0.00201789	0.00201789	0.212934	-0.0448292	0.470697	0.105052	Higher in SVN
infant_taxa_56	Unknown_CAG.460.1	infant_taxa_56__Unknown_CAG.460.1	Infant Fecal Microbiome (Taxa)	5-6 months	stool_microbiome_infant	0.00201789	0.00201789	0.212934	-0.0448292	0.470697	0.105052	Higher in SVN
infant_taxa_56	Unknown_CAG.460.2	infant_taxa_56__Unknown_CAG.460.2	Infant Fecal Microbiome (Taxa)	5-6 months	stool_microbiome_infant	0.00201789	0.00201789	0.212934	-0.0448292	0.470697	0.105052	Higher in SVN
infant_taxa_56	Unknown_CAG.460.3	infant_taxa_56__Unknown_CAG.460.3	Infant Fecal Microbiome (Taxa)	5-6 months	stool_microbiome_infant	0.00201789	0.00201789	0.212934	-0.0448292	0.470697	0.105052	Higher in SVN
infant_taxa_56	Unknown_CAG.460.4	infant_taxa_56__Unknown_CAG.460.4	Infant Fecal Microbiome (Taxa)	5-6 months	stool_microbiome_infant	0.00201789	0.00201789	0.212934	-0.0448292	0.470697	0.105052	Higher in SVN
infant_taxa_56	Unknown_CAG.460.5	infant_taxa_56__Unknown_CAG.460.5	Infant Fecal Microbiome (Taxa)	5-6 months	stool_microbiome_infant	0.00201789	0.00201789	0.212934	-0.0448292	0.470697	0.105052	Higher in SVN
infant_taxa_56	Unknown_CAG.460.6	infant_taxa_56__Unknown_CAG.460.6	Infant Fecal Microbiome (Taxa)	5-6 months	stool_microbiome_infant	0.00201789	0.00201789	0.212934	-0.0448292	0.470697	0.105052	Higher in SVN
infant_taxa_56	Unknown_CAG.460.7	infant_taxa_56__Unknown_CAG.460.7	Infant Fecal Microbiome (Taxa)	5-6 months	stool_microbiome_infant	0.00201789	0.00201789	0.212934	-0.0448292	0.470697	0.105052	Higher in SVN
infant_taxa_56	Unknown_CAG.460.8	infant_taxa_56__Unknown_CAG.460.8	Infant Fecal Microbiome (Taxa)	5-6 months	stool_microbiome_infant	0.00201789	0.00201789	0.212934	-0.0448292	0.470697	0.105052	Higher in SVN
infant_taxa_56	Unknown_CAG.460.9	infant_taxa_56__Unknown_CAG.460.9	Infant Fecal Microbiome (Taxa)	5-6 months	stool_microbiome_infant	0.00201789	0.00201789	0.212934	-0.0448292	0.470697	0.105052	Higher in SVN
infant_taxa_56	Unknown_CAG.460.10	infant_taxa_56__Unknown_CAG.460.10	Infant Fecal Microbiome (Taxa)	5-6 months	stool_microbiome_infant	0.00201789	0.00201789	0.212934	-0.0448292	0.470697	0.105052	Higher in SVN
infant_taxa_56	Unknown_CAG.460.11	infant_taxa_56__Unknown_CAG.460.11	Infant Fecal Microbiome (Taxa)	5-6 months	stool_microbiome_infant	0.00201789	0.00201789	0.212934	-0.0448292	0.470697	0.105052	Higher in SVN
infant_taxa_56	Unknown_CAG.460.12	infant_taxa_56__Unknown_CAG.460.12	Infant Fecal Microbiome (Taxa)	5-6 months	stool_microbiome_infant	0.00201789	0.00201789	0.212934	-0.0448292	0.470697	0.105052	Higher in SVN
infant_taxa_56	Unknown_CAG.460.13	infant_taxa_56__Unknown_CAG.460.13	Infant Fecal Microbiome (Taxa)	5-6 months	stool_microbiome_infant	0.00201789	0.00201789	0.212934	-0.0448292	0.470697	0.105052	Higher in SVN
infant_taxa_56	Unknown_CAG.460.14	infant_taxa_56__Unknown_CAG.460.14	Infant Fecal Microbiome (Taxa)	5-6 months	stool_microbiome_infant	0.00201789	0.00201789	0.212934	-0.0448292	0.470697	0.105052	Higher in SVN
infant_taxa_56	Unknown_CAG.460.15	infant_taxa_56__Unknown_CAG.460.15	Infant Fecal Microbiome (Taxa)	5-6 months	stool_microbiome_infant	0.00201789	0.00201789	0.212934	-0.0448292	0.470697	0.105052	Higher in SVN
infant_taxa_56	Unknown_CAG.460.16	infant_taxa_56__Unknown_CAG.460.16	Infant Fecal Microbiome (Taxa)	5-6 months	stool_microbiome_infant	0.00201789	0.00201789	0.212934	-0.0448292	0.470697	0.105052	Higher in SVN
infant_taxa_56	Unknown_CAG.460.17	infant_taxa_56__Unknown_CAG.460.17	Infant Fecal Microbiome (Taxa)	5-6 months	stool_microbiome_infant	0.00201789	0.00201789	0.212934	-0.0448292	0.470697	0.105052	Higher in SVN
infant_taxa_56	Unknown_CAG.460.18	infant_taxa_56__Unknown_CAG.460.18	Infant Fecal Microbiome (Taxa)	5-6 months	stool_microbiome_infant	0.00201789	0.00201789	0.212934	-0.0448292	0.470697	0.105052	Higher in SVN
infant_taxa_56	CAG.533.sp000434495	infant_taxa_56__CAG.533.sp000434495	Infant Fecal Microbiome (Taxa)	5-6 months	stool_microbiome_infant	0.00201789	0.00201789	0.212934	-0.0448292	0.470697	0.105052	Higher in SVN
infant_taxa_56	CAG.533.sp004563275	infant_taxa_56__CAG.533.sp004563275	Infant Fecal Microbiome (Taxa)	5-6 months	stool_microbiome_infant	0.00201789	0.00201789	0.212934	-0.0448292	0.470697	0.105052	Higher in SVN
infant_taxa_56	CAG.533.sp900551105	infant_taxa_56__CAG.533.sp900551105	Infant Fecal Microbiome (Taxa)	5-6 months	stool_microbiome_infant	0.00201789	0.00201789	0.212934	-0.0448292	0.470697	0.105052	Higher in SVN
infant_taxa_56	CAG.533.sp900553855	infant_taxa_56__CAG.533.sp900553855	Infant Fecal Microbiome (Taxa)	5-6 months	stool_microbiome_infant	0.00201789	0.00201789	0.212934	-0.0448292	0.470697	0.105052	Higher in SVN
infant_taxa_56	Unknown_CAG.533	infant_taxa_56__Unknown_CAG.533	Infant Fecal Microbiome (Taxa)	5-6 months	stool_microbiome_infant	0.00201789	0.00201789	0.212934	-0.0448292	0.470697	0.105052	Higher in SVN
infant_taxa_56	Unknown_CAG.533.1	infant_taxa_56__Unknown_CAG.533.1	Infant Fecal Microbiome (Taxa)	5-6 months	stool_microbiome_infant	0.00201789	0.00201789	0.212934	-0.0448292	0.470697	0.105052	Higher in SVN
infant_taxa_56	Unknown_CAG.533.2	infant_taxa_56__Unknown_CAG.533.2	Infant Fecal Microbiome (Taxa)	5-6 months	stool_microbiome_infant	0.00201789	0.00201789	0.212934	-0.0448292	0.470697	0.105052	Higher in SVN
infant_taxa_56	Unknown_CAG.533.3	infant_taxa_56__Unknown_CAG.533.3	Infant Fecal Microbiome (Taxa)	5-6 months	stool_microbiome_infant	0.00201789	0.00201789	0.212934	-0.0448292	0.470697	0.105052	Higher in SVN
infant_taxa_56	Unknown_CAG.533.4	infant_taxa_56__Unknown_CAG.533.4	Infant Fecal Microbiome (Taxa)	5-6 months	stool_microbiome_infant	0.00201789	0.00201789	0.212934	-0.0448292	0.470697	0.105052	Higher in SVN
infant_taxa_56	Unknown_CAG.533.5	infant_taxa_56__Unknown_CAG.533.5	Infant Fecal Microbiome (Taxa)	5-6 months	stool_microbiome_infant	0.00201789	0.00201789	0.212934	-0.0448292	0.470697	0.105052	Higher in SVN
infant_taxa_56	Unknown_CAG.533.6	infant_taxa_56__Unknown_CAG.533.6	Infant Fecal Microbiome (Taxa)	5-6 months	stool_microbiome_infant	0.00201789	0.00201789	0.212934	-0.0448292	0.470697	0.105052	Higher in SVN
infant_taxa_56	Unknown_CAG.533.7	infant_taxa_56__Unknown_CAG.533.7	Infant Fecal Microbiome (Taxa)	5-6 months	stool_microbiome_infant	0.00201789	0.00201789	0.212934	-0.0448292	0.470697	0.105052	Higher in SVN
infant_taxa_56	Unknown_CAG.533.8	infant_taxa_56__Unknown_CAG.533.8	Infant Fecal Microbiome (Taxa)	5-6 months	stool_microbiome_infant	0.00201789	0.00201789	0.212934	-0.0448292	0.470697	0.105052	Higher in SVN
infant_taxa_56	Unknown_CAG.533.9	infant_taxa_56__Unknown_CAG.533.9	Infant Fecal Microbiome (Taxa)	5-6 months	stool_microbiome_infant	0.00201789	0.00201789	0.212934	-0.0448292	0.470697	0.105052	Higher in SVN
infant_taxa_56	Unknown_CAG.533.10	infant_taxa_56__Unknown_CAG.533.10	Infant Fecal Microbiome (Taxa)	5-6 months	stool_microbiome_infant	0.00201789	0.00201789	0.212934	-0.0448292	0.470697	0.105052	Higher in SVN
infant_taxa_56	CAG.582.sp000435515	infant_taxa_56__CAG.582.sp000435515	Infant Fecal Microbiome (Taxa)	5-6 months	stool_microbiome_infant	0.00201789	0.00201789	0.212934	-0.0448292	0.470697	0.105052	Higher in SVN
infant_taxa_56	Unknown_CAG.582	infant_taxa_56__Unknown_CAG.582	Infant Fecal Microbiome (Taxa)	5-6 months	stool_microbiome_infant	0.00201789	0.00201789	0.212934	-0.0448292	0.470697	0.105052	Higher in SVN
infant_taxa_56	Unknown_CAG.582.1	infant_taxa_56__Unknown_CAG.582.1	Infant Fecal Microbiome (Taxa)	5-6 months	stool_microbiome_infant	0.00201789	0.00201789	0.212934	-0.0448292	0.470697	0.105052	Higher in SVN
infant_taxa_56	Unknown_CAG.582.2	infant_taxa_56__Unknown_CAG.582.2	Infant Fecal Microbiome (Taxa)	5-6 months	stool_microbiome_infant	0.00201789	0.00201789	0.212934	-0.0448292	0.470697	0.105052	Higher in SVN
infant_taxa_56	Unknown_CAG.582.3	infant_taxa_56__Unknown_CAG.582.3	Infant Fecal Microbiome (Taxa)	5-6 months	stool_microbiome_infant	0.00201789	0.00201789	0.212934	-0.0448292	0.470697	0.105052	Higher in SVN
infant_taxa_56	CAG.605.sp000433255	infant_taxa_56__CAG.605.sp000433255	Infant Fecal Microbiome (Taxa)	5-6 months	stool_microbiome_infant	0.00201789	0.00201789	0.212934	-0.0448292	0.470697	0.105052	Higher in SVN
infant_taxa_56	CAG.605.sp000433475	infant_taxa_56__CAG.605.sp000433475	Infant Fecal Microbiome (Taxa)	5-6 months	stool_microbiome_infant	0.00201789	0.00201789	0.212934	-0.0448292	0.470697	0.105052	Higher in SVN
infant_taxa_56	CAG.605.sp900545005	infant_taxa_56__CAG.605.sp900545005	Infant Fecal Microbiome (Taxa)	5-6 months	stool_microbiome_infant	0.00201789	0.00201789	0.212934	-0.0448292	0.470697	0.105052	Higher in SVN
infant_taxa_56	Unknown_CAG.605	infant_taxa_56__Unknown_CAG.605	Infant Fecal Microbiome (Taxa)	5-6 months	stool_microbiome_infant	0.00201789	0.00201789	0.212934	-0.0448292	0.470697	0.105052	Higher in SVN
infant_taxa_56	Unknown_CAG.605.1	infant_taxa_56__Unknown_CAG.605.1	Infant Fecal Microbiome (Taxa)	5-6 months	stool_microbiome_infant	0.00201789	0.00201789	0.212934	-0.0448292	0.470697	0.105052	Higher in SVN
infant_taxa_56	Unknown_CAG.605.2	infant_taxa_56__Unknown_CAG.605.2	Infant Fecal Microbiome (Taxa)	5-6 months	stool_microbiome_infant	0.00201789	0.00201789	0.212934	-0.0448292	0.470697	0.105052	Higher in SVN
infant_taxa_56	Unknown_CAG.605.3	infant_taxa_56__Unknown_CAG.605.3	Infant Fecal Microbiome (Taxa)	5-6 months	stool_microbiome_infant	0.00201789	0.00201789	0.212934	-0.0448292	0.470697	0.105052	Higher in SVN
infant_taxa_56	Unknown_CAG.605.4	infant_taxa_56__Unknown_CAG.605.4	Infant Fecal Microbiome (Taxa)	5-6 months	stool_microbiome_infant	0.00201789	0.00201789	0.212934	-0.0448292	0.470697	0.105052	Higher in SVN
infant_taxa_56	Unknown_CAG.605.5	infant_taxa_56__Unknown_CAG.605.5	Infant Fecal Microbiome (Taxa)	5-6 months	stool_microbiome_infant	0.00201789	0.00201789	0.212934	-0.0448292	0.470697	0.105052	Higher in SVN
infant_taxa_56	Unknown_CAG.605.6	infant_taxa_56__Unknown_CAG.605.6	Infant Fecal Microbiome (Taxa)	5-6 months	stool_microbiome_infant	0.00201789	0.00201789	0.212934	-0.0448292	0.470697	0.105052	Higher in SVN
infant_taxa_56	Unknown_CAG.605.7	infant_taxa_56__Unknown_CAG.605.7	Infant Fecal Microbiome (Taxa)	5-6 months	stool_microbiome_infant	0.00201789	0.00201789	0.212934	-0.0448292	0.470697	0.105052	Higher in SVN
infant_taxa_56	Unknown_CAG.605.8	infant_taxa_56__Unknown_CAG.605.8	Infant Fecal Microbiome (Taxa)	5-6 months	stool_microbiome_infant	0.00201789	0.00201789	0.212934	-0.0448292	0.470697	0.105052	Higher in SVN
infant_taxa_56	Unknown_CAG.605.9	infant_taxa_56__Unknown_CAG.605.9	Infant Fecal Microbiome (Taxa)	5-6 months	stool_microbiome_infant	0.00201789	0.00201789	0.212934	-0.0448292	0.470697	0.105052	Higher in SVN
infant_taxa_56	CAG.628.sp000438415	infant_taxa_56__CAG.628.sp000438415	Infant Fecal Microbiome (Taxa)	5-6 months	stool_microbiome_infant	0.00201789	0.00201789	0.212934	-0.0448292	0.470697	0.105052	Higher in SVN
infant_taxa_56	CAG.628.sp003524085	infant_taxa_56__CAG.628.sp003524085	Infant Fecal Microbiome (Taxa)	5-6 months	stool_microbiome_infant	0.00201789	0.00201789	0.212934	-0.0448292	0.470697	0.105052	Higher in SVN
infant_taxa_56	CAG.628.sp900553835	infant_taxa_56__CAG.628.sp900553835	Infant Fecal Microbiome (Taxa)	5-6 months	stool_microbiome_infant	0.00201789	0.00201789	0.212934	-0.0448292	0.470697	0.105052	Higher in SVN
infant_taxa_56	Unknown_CAG.628	infant_taxa_56__Unknown_CAG.628	Infant Fecal Microbiome (Taxa)	5-6 months	stool_microbiome_infant	0.00201789	0.00201789	0.212934	-0.0448292	0.470697	0.105052	Higher in SVN
infant_taxa_56	Unknown_CAG.628.1	infant_taxa_56__Unknown_CAG.628.1	Infant Fecal Microbiome (Taxa)	5-6 months	stool_microbiome_infant	0.00201789	0.00201789	0.212934	-0.0448292	0.470697	0.105052	Higher in SVN
infant_taxa_56	Unknown_CAG.628.2	infant_taxa_56__Unknown_CAG.628.2	Infant Fecal Microbiome (Taxa)	5-6 months	stool_microbiome_infant	0.00201789	0.00201789	0.212934	-0.0448292	0.470697	0.105052	Higher in SVN
infant_taxa_56	Unknown_CAG.628.3	infant_taxa_56__Unknown_CAG.628.3	Infant Fecal Microbiome (Taxa)	5-6 months	stool_microbiome_infant	0.00201789	0.00201789	0.212934	-0.0448292	0.470697	0.105052	Higher in SVN
infant_taxa_56	Unknown_CAG.776	infant_taxa_56__Unknown_CAG.776	Infant Fecal Microbiome (Taxa)	5-6 months	stool_microbiome_infant	0.00201789	0.00201789	0.212934	-0.0448292	0.470697	0.105052	Higher in SVN
infant_taxa_56	UBA11963.sp900552975	infant_taxa_56__UBA11963.sp900552975	Infant Fecal Microbiome (Taxa)	5-6 months	stool_microbiome_infant	0.00201789	0.00201789	0.212934	-0.0448292	0.470697	0.105052	Higher in SVN
infant_taxa_56	Unknown_UBA11963	infant_taxa_56__Unknown_UBA11963	Infant Fecal Microbiome (Taxa)	5-6 months	stool_microbiome_infant	0.00201789	0.00201789	0.212934	-0.0448292	0.470697	0.105052	Higher in SVN
infant_taxa_56	Unknown_UBA11963.1	infant_taxa_56__Unknown_UBA11963.1	Infant Fecal Microbiome (Taxa)	5-6 months	stool_microbiome_infant	0.00201789	0.00201789	0.212934	-0.0448292	0.470697	0.105052	Higher in SVN
infant_taxa_56	UMGS1124.sp900548725	infant_taxa_56__UMGS1124.sp900548725	Infant Fecal Microbiome (Taxa)	5-6 months	stool_microbiome_infant	0.00201789	0.00201789	0.212934	-0.0448292	0.470697	0.105052	Higher in SVN
infant_taxa_56	Unknown_UMGS1124	infant_taxa_56__Unknown_UMGS1124	Infant Fecal Microbiome (Taxa)	5-6 months	stool_microbiome_infant	0.00201789	0.00201789	0.212934	-0.0448292	0.470697	0.105052	Higher in SVN
infant_taxa_56	Unknown_UMGS1124.1	infant_taxa_56__Unknown_UMGS1124.1	Infant Fecal Microbiome (Taxa)	5-6 months	stool_microbiome_infant	0.00201789	0.00201789	0.212934	-0.0448292	0.470697	0.105052	Higher in SVN
infant_taxa_56	Unknown_UMGS1124.2	infant_taxa_56__Unknown_UMGS1124.2	Infant Fecal Microbiome (Taxa)	5-6 months	stool_microbiome_infant	0.00201789	0.00201789	0.212934	-0.0448292	0.470697	0.105052	Higher in SVN
infant_taxa_56	Unknown_UMGS1124.3	infant_taxa_56__Unknown_UMGS1124.3	Infant Fecal Microbiome (Taxa)	5-6 months	stool_microbiome_infant	0.00201789	0.00201789	0.212934	-0.0448292	0.470697	0.105052	Higher in SVN
infant_taxa_56	Unknown_UMGS1124.4	infant_taxa_56__Unknown_UMGS1124.4	Infant Fecal Microbiome (Taxa)	5-6 months	stool_microbiome_infant	0.00201789	0.00201789	0.212934	-0.0448292	0.470697	0.105052	Higher in SVN
infant_taxa_56	Unknown_UMGS1124.5	infant_taxa_56__Unknown_UMGS1124.5	Infant Fecal Microbiome (Taxa)	5-6 months	stool_microbiome_infant	0.00201789	0.00201789	0.212934	-0.0448292	0.470697	0.105052	Higher in SVN
infant_taxa_56	Unknown_UMGS1124.6	infant_taxa_56__Unknown_UMGS1124.6	Infant Fecal Microbiome (Taxa)	5-6 months	stool_microbiome_infant	0.00201789	0.00201789	0.212934	-0.0448292	0.470697	0.105052	Higher in SVN
infant_taxa_56	Unknown_UMGS1124.7	infant_taxa_56__Unknown_UMGS1124.7	Infant Fecal Microbiome (Taxa)	5-6 months	stool_microbiome_infant	0.00201789	0.00201789	0.212934	-0.0448292	0.470697	0.105052	Higher in SVN
infant_taxa_56	Unknown_UMGS1124.8	infant_taxa_56__Unknown_UMGS1124.8	Infant Fecal Microbiome (Taxa)	5-6 months	stool_microbiome_infant	0.00201789	0.00201789	0.212934	-0.0448292	0.470697	0.105052	Higher in SVN
infant_taxa_56	UMGS1217.sp900549625	infant_taxa_56__UMGS1217.sp900549625	Infant Fecal Microbiome (Taxa)	5-6 months	stool_microbiome_infant	0.00201789	0.00201789	0.212934	-0.0448292	0.470697	0.105052	Higher in SVN
infant_taxa_56	Unknown_UMGS1217	infant_taxa_56__Unknown_UMGS1217	Infant Fecal Microbiome (Taxa)	5-6 months	stool_microbiome_infant	0.00201789	0.00201789	0.212934	-0.0448292	0.470697	0.105052	Higher in SVN
infant_taxa_56	Unknown_UMGS1217.1	infant_taxa_56__Unknown_UMGS1217.1	Infant Fecal Microbiome (Taxa)	5-6 months	stool_microbiome_infant	0.00201789	0.00201789	0.212934	-0.0448292	0.470697	0.105052	Higher in SVN
infant_taxa_56	Unknown_UMGS1217.2	infant_taxa_56__Unknown_UMGS1217.2	Infant Fecal Microbiome (Taxa)	5-6 months	stool_microbiome_infant	0.00201789	0.00201789	0.212934	-0.0448292	0.470697	0.105052	Higher in SVN
infant_taxa_56	Unknown_UMGS1217.3	infant_taxa_56__Unknown_UMGS1217.3	Infant Fecal Microbiome (Taxa)	5-6 months	stool_microbiome_infant	0.00201789	0.00201789	0.212934	-0.0448292	0.470697	0.105052	Higher in SVN
infant_taxa_56	Unknown_UMGS1217.4	infant_taxa_56__Unknown_UMGS1217.4	Infant Fecal Microbiome (Taxa)	5-6 months	stool_microbiome_infant	0.00201789	0.00201789	0.212934	-0.0448292	0.470697	0.105052	Higher in SVN
infant_taxa_56	Unknown_UMGS1217.5	infant_taxa_56__Unknown_UMGS1217.5	Infant Fecal Microbiome (Taxa)	5-6 months	stool_microbiome_infant	0.00201789	0.00201789	0.212934	-0.0448292	0.470697	0.105052	Higher in SVN
infant_taxa_56	Unknown_UMGS1217.6	infant_taxa_56__Unknown_UMGS1217.6	Infant Fecal Microbiome (Taxa)	5-6 months	stool_microbiome_infant	0.00201789	0.00201789	0.212934	-0.0448292	0.470697	0.105052	Higher in SVN
infant_taxa_56	Unknown_CAG.1000_2	infant_taxa_56__Unknown_CAG.1000_2	Infant Fecal Microbiome (Taxa)	5-6 months	stool_microbiome_infant	0.00201789	0.00201789	0.212934	-0.0448292	0.470697	0.105052	Higher in SVN
infant_taxa_56	Unknown_CAG.1000_2.1	infant_taxa_56__Unknown_CAG.1000_2.1	Infant Fecal Microbiome (Taxa)	5-6 months	stool_microbiome_infant	0.00201789	0.00201789	0.212934	-0.0448292	0.470697	0.105052	Higher in SVN
infant_taxa_56	Unknown_CAG.1000_2.2	infant_taxa_56__Unknown_CAG.1000_2.2	Infant Fecal Microbiome (Taxa)	5-6 months	stool_microbiome_infant	0.00201789	0.00201789	0.212934	-0.0448292	0.470697	0.105052	Higher in SVN
infant_taxa_56	Unknown_CAG.1000_2.3	infant_taxa_56__Unknown_CAG.1000_2.3	Infant Fecal Microbiome (Taxa)	5-6 months	stool_microbiome_infant	0.00201789	0.00201789	0.212934	-0.0448292	0.470697	0.105052	Higher in SVN
infant_taxa_56	Unknown_CAG.1000_2.4	infant_taxa_56__Unknown_CAG.1000_2.4	Infant Fecal Microbiome (Taxa)	5-6 months	stool_microbiome_infant	0.00201789	0.00201789	0.212934	-0.0448292	0.470697	0.105052	Higher in SVN
infant_taxa_56	Unknown_CAG.1000_2.5	infant_taxa_56__Unknown_CAG.1000_2.5	Infant Fecal Microbiome (Taxa)	5-6 months	stool_microbiome_infant	0.00201789	0.00201789	0.212934	-0.0448292	0.470697	0.105052	Higher in SVN
infant_taxa_56	Unknown_CAG.1000_2.6	infant_taxa_56__Unknown_CAG.1000_2.6	Infant Fecal Microbiome (Taxa)	5-6 months	stool_microbiome_infant	0.00201789	0.00201789	0.212934	-0.0448292	0.470697	0.105052	Higher in SVN
infant_taxa_56	Unknown_CAG.1000_2.7	infant_taxa_56__Unknown_CAG.1000_2.7	Infant Fecal Microbiome (Taxa)	5-6 months	stool_microbiome_infant	0.00201789	0.00201789	0.212934	-0.0448292	0.470697	0.105052	Higher in SVN
infant_taxa_56	CAG.302.sp000431795	infant_taxa_56__CAG.302.sp000431795	Infant Fecal Microbiome (Taxa)	5-6 months	stool_microbiome_infant	0.00201789	0.00201789	0.212934	-0.0448292	0.470697	0.105052	Higher in SVN
infant_taxa_56	CAG.302.sp001916775	infant_taxa_56__CAG.302.sp001916775	Infant Fecal Microbiome (Taxa)	5-6 months	stool_microbiome_infant	0.00201789	0.00201789	0.212934	-0.0448292	0.470697	0.105052	Higher in SVN
infant_taxa_56	CAG.302.sp001916775.1	infant_taxa_56__CAG.302.sp001916775.1	Infant Fecal Microbiome (Taxa)	5-6 months	stool_microbiome_infant	0.00201789	0.00201789	0.212934	-0.0448292	0.470697	0.105052	Higher in SVN
infant_taxa_56	CAG.302.sp900543825	infant_taxa_56__CAG.302.sp900543825	Infant Fecal Microbiome (Taxa)	5-6 months	stool_microbiome_infant	0.00201789	0.00201789	0.212934	-0.0448292	0.470697	0.105052	Higher in SVN
infant_taxa_56	CAG.302.sp900548425	infant_taxa_56__CAG.302.sp900548425	Infant Fecal Microbiome (Taxa)	5-6 months	stool_microbiome_infant	0.00201789	0.00201789	0.212934	-0.0448292	0.470697	0.105052	Higher in SVN
infant_taxa_56	CAG.302.sp900549325	infant_taxa_56__CAG.302.sp900549325	Infant Fecal Microbiome (Taxa)	5-6 months	stool_microbiome_infant	0.00201789	0.00201789	0.212934	-0.0448292	0.470697	0.105052	Higher in SVN
infant_taxa_56	CAG.302.sp900554615	infant_taxa_56__CAG.302.sp900554615	Infant Fecal Microbiome (Taxa)	5-6 months	stool_microbiome_infant	0.00201789	0.00201789	0.212934	-0.0448292	0.470697	0.105052	Higher in SVN
infant_taxa_56	Unknown_CAG.302_1	infant_taxa_56__Unknown_CAG.302_1	Infant Fecal Microbiome (Taxa)	5-6 months	stool_microbiome_infant	0.00201789	0.00201789	0.212934	-0.0448292	0.470697	0.105052	Higher in SVN
infant_taxa_56	Unknown_CAG.302_1.1	infant_taxa_56__Unknown_CAG.302_1.1	Infant Fecal Microbiome (Taxa)	5-6 months	stool_microbiome_infant	0.00201789	0.00201789	0.212934	-0.0448292	0.470697	0.105052	Higher in SVN
infant_taxa_56	Unknown_CAG.302_1.2	infant_taxa_56__Unknown_CAG.302_1.2	Infant Fecal Microbiome (Taxa)	5-6 months	stool_microbiome_infant	0.00201789	0.00201789	0.212934	-0.0448292	0.470697	0.105052	Higher in SVN
infant_taxa_56	Unknown_CAG.302_1.3	infant_taxa_56__Unknown_CAG.302_1.3	Infant Fecal Microbiome (Taxa)	5-6 months	stool_microbiome_infant	0.00201789	0.00201789	0.212934	-0.0448292	0.470697	0.105052	Higher in SVN
infant_taxa_56	Unknown_CAG.302_1.4	infant_taxa_56__Unknown_CAG.302_1.4	Infant Fecal Microbiome (Taxa)	5-6 months	stool_microbiome_infant	0.00201789	0.00201789	0.212934	-0.0448292	0.470697	0.105052	Higher in SVN
infant_taxa_56	Unknown_CAG.302_1.5	infant_taxa_56__Unknown_CAG.302_1.5	Infant Fecal Microbiome (Taxa)	5-6 months	stool_microbiome_infant	0.00201789	0.00201789	0.212934	-0.0448292	0.470697	0.105052	Higher in SVN
infant_taxa_56	Unknown_CAG.302_1.6	infant_taxa_56__Unknown_CAG.302_1.6	Infant Fecal Microbiome (Taxa)	5-6 months	stool_microbiome_infant	0.00201789	0.00201789	0.212934	-0.0448292	0.470697	0.105052	Higher in SVN
infant_taxa_56	CAG.762.sp000432575	infant_taxa_56__CAG.762.sp000432575	Infant Fecal Microbiome (Taxa)	5-6 months	stool_microbiome_infant	0.00201789	0.00201789	0.212934	-0.0448292	0.470697	0.105052	Higher in SVN
infant_taxa_56	Unknown_CAG.762	infant_taxa_56__Unknown_CAG.762	Infant Fecal Microbiome (Taxa)	5-6 months	stool_microbiome_infant	0.00201789	0.00201789	0.212934	-0.0448292	0.470697	0.105052	Higher in SVN
infant_taxa_56	Unknown_CAG.762.1	infant_taxa_56__Unknown_CAG.762.1	Infant Fecal Microbiome (Taxa)	5-6 months	stool_microbiome_infant	0.00201789	0.00201789	0.212934	-0.0448292	0.470697	0.105052	Higher in SVN
infant_taxa_56	CAG.914.sp000437895	infant_taxa_56__CAG.914.sp000437895	Infant Fecal Microbiome (Taxa)	5-6 months	stool_microbiome_infant	0.00201789	0.00201789	0.212934	-0.0448292	0.470697	0.105052	Higher in SVN
infant_taxa_56	RUG705.sp900551455	infant_taxa_56__RUG705.sp900551455	Infant Fecal Microbiome (Taxa)	5-6 months	stool_microbiome_infant	0.00201789	0.00201789	0.212934	-0.0448292	0.470697	0.105052	Higher in SVN
infant_taxa_56	Unknown_RUG705	infant_taxa_56__Unknown_RUG705	Infant Fecal Microbiome (Taxa)	5-6 months	stool_microbiome_infant	0.00201789	0.00201789	0.212934	-0.0448292	0.470697	0.105052	Higher in SVN
infant_taxa_56	Unknown_RUG705.1	infant_taxa_56__Unknown_RUG705.1	Infant Fecal Microbiome (Taxa)	5-6 months	stool_microbiome_infant	0.00201789	0.00201789	0.212934	-0.0448292	0.470697	0.105052	Higher in SVN
infant_taxa_56	Unknown_RUG705.2	infant_taxa_56__Unknown_RUG705.2	Infant Fecal Microbiome (Taxa)	5-6 months	stool_microbiome_infant	0.00201789	0.00201789	0.212934	-0.0448292	0.470697	0.105052	Higher in SVN
infant_taxa_56	Unknown_RUG705.3	infant_taxa_56__Unknown_RUG705.3	Infant Fecal Microbiome (Taxa)	5-6 months	stool_microbiome_infant	0.00201789	0.00201789	0.212934	-0.0448292	0.470697	0.105052	Higher in SVN
infant_taxa_56	Unknown_UBA6414	infant_taxa_56__Unknown_UBA6414	Infant Fecal Microbiome (Taxa)	5-6 months	stool_microbiome_infant	0.00201789	0.00201789	0.212934	-0.0448292	0.470697	0.105052	Higher in SVN
infant_taxa_56	Unknown_UBA6414.1	infant_taxa_56__Unknown_UBA6414.1	Infant Fecal Microbiome (Taxa)	5-6 months	stool_microbiome_infant	0.00201789	0.00201789	0.212934	-0.0448292	0.470697	0.105052	Higher in SVN
infant_taxa_56	UMGS2068.sp900557675	infant_taxa_56__UMGS2068.sp900557675	Infant Fecal Microbiome (Taxa)	5-6 months	stool_microbiome_infant	0.00201789	0.00201789	0.212934	-0.0448292	0.470697	0.105052	Higher in SVN
infant_taxa_56	Unknown_CAG.302_2	infant_taxa_56__Unknown_CAG.302_2	Infant Fecal Microbiome (Taxa)	5-6 months	stool_microbiome_infant	0.00201789	0.00201789	0.212934	-0.0448292	0.470697	0.105052	Higher in SVN
infant_taxa_56	Unknown_CAG.302_2.1	infant_taxa_56__Unknown_CAG.302_2.1	Infant Fecal Microbiome (Taxa)	5-6 months	stool_microbiome_infant	0.00201789	0.00201789	0.212934	-0.0448292	0.470697	0.105052	Higher in SVN
infant_taxa_56	Unknown_CAG.302_2.2	infant_taxa_56__Unknown_CAG.302_2.2	Infant Fecal Microbiome (Taxa)	5-6 months	stool_microbiome_infant	0.00201789	0.00201789	0.212934	-0.0448292	0.470697	0.105052	Higher in SVN
infant_taxa_56	Unknown_CAG.302_2.3	infant_taxa_56__Unknown_CAG.302_2.3	Infant Fecal Microbiome (Taxa)	5-6 months	stool_microbiome_infant	0.00201789	0.00201789	0.212934	-0.0448292	0.470697	0.105052	Higher in SVN
infant_taxa_56	Unknown_CAG.302_2.4	infant_taxa_56__Unknown_CAG.302_2.4	Infant Fecal Microbiome (Taxa)	5-6 months	stool_microbiome_infant	0.00201789	0.00201789	0.212934	-0.0448292	0.470697	0.105052	Higher in SVN
infant_taxa_56	Unknown_CAG.302_2.5	infant_taxa_56__Unknown_CAG.302_2.5	Infant Fecal Microbiome (Taxa)	5-6 months	stool_microbiome_infant	0.00201789	0.00201789	0.212934	-0.0448292	0.470697	0.105052	Higher in SVN
infant_taxa_56	Unknown_CAG.302_2.6	infant_taxa_56__Unknown_CAG.302_2.6	Infant Fecal Microbiome (Taxa)	5-6 months	stool_microbiome_infant	0.00201789	0.00201789	0.212934	-0.0448292	0.470697	0.105052	Higher in SVN
infant_taxa_56	Unknown_CAG.302_2.7	infant_taxa_56__Unknown_CAG.302_2.7	Infant Fecal Microbiome (Taxa)	5-6 months	stool_microbiome_infant	0.00201789	0.00201789	0.212934	-0.0448292	0.470697	0.105052	Higher in SVN
infant_taxa_56	Unknown_CAG.302_2.8	infant_taxa_56__Unknown_CAG.302_2.8	Infant Fecal Microbiome (Taxa)	5-6 months	stool_microbiome_infant	0.00201789	0.00201789	0.212934	-0.0448292	0.470697	0.105052	Higher in SVN
infant_taxa_56	Unknown_CAG.302_2.9	infant_taxa_56__Unknown_CAG.302_2.9	Infant Fecal Microbiome (Taxa)	5-6 months	stool_microbiome_infant	0.00201789	0.00201789	0.212934	-0.0448292	0.470697	0.105052	Higher in SVN
infant_taxa_56	Unknown_CAG.302_2.10	infant_taxa_56__Unknown_CAG.302_2.10	Infant Fecal Microbiome (Taxa)	5-6 months	stool_microbiome_infant	0.00201789	0.00201789	0.212934	-0.0448292	0.470697	0.105052	Higher in SVN
infant_taxa_56	Unknown_CAG.302_2.11	infant_taxa_56__Unknown_CAG.302_2.11	Infant Fecal Microbiome (Taxa)	5-6 months	stool_microbiome_infant	0.00201789	0.00201789	0.212934	-0.0448292	0.470697	0.105052	Higher in SVN
infant_taxa_56	Unknown_CAG.302_2.12	infant_taxa_56__Unknown_CAG.302_2.12	Infant Fecal Microbiome (Taxa)	5-6 months	stool_microbiome_infant	0.00201789	0.00201789	0.212934	-0.0448292	0.470697	0.105052	Higher in SVN
infant_taxa_56	Unknown_CAG.302_2.13	infant_taxa_56__Unknown_CAG.302_2.13	Infant Fecal Microbiome (Taxa)	5-6 months	stool_microbiome_infant	0.00201789	0.00201789	0.212934	-0.0448292	0.470697	0.105052	Higher in SVN
infant_taxa_56	Unknown_CAG.302_2.14	infant_taxa_56__Unknown_CAG.302_2.14	Infant Fecal Microbiome (Taxa)	5-6 months	stool_microbiome_infant	0.00201789	0.00201789	0.212934	-0.0448292	0.470697	0.105052	Higher in SVN
infant_taxa_56	Unknown_CAG.302_2.15	infant_taxa_56__Unknown_CAG.302_2.15	Infant Fecal Microbiome (Taxa)	5-6 months	stool_microbiome_infant	0.00201789	0.00201789	0.212934	-0.0448292	0.470697	0.105052	Higher in SVN
infant_taxa_56	CAG.433.sp000433675	infant_taxa_56__CAG.433.sp000433675	Infant Fecal Microbiome (Taxa)	5-6 months	stool_microbiome_infant	0.00201789	0.00201789	0.212934	-0.0448292	0.470697	0.105052	Higher in SVN
infant_taxa_56	CAG.433.sp900546245	infant_taxa_56__CAG.433.sp900546245	Infant Fecal Microbiome (Taxa)	5-6 months	stool_microbiome_infant	0.00201789	0.00201789	0.212934	-0.0448292	0.470697	0.105052	Higher in SVN
infant_taxa_56	Unknown_CAG.433_1	infant_taxa_56__Unknown_CAG.433_1	Infant Fecal Microbiome (Taxa)	5-6 months	stool_microbiome_infant	0.00201789	0.00201789	0.212934	-0.0448292	0.470697	0.105052	Higher in SVN
infant_taxa_56	Unknown_CAG.433_1.1	infant_taxa_56__Unknown_CAG.433_1.1	Infant Fecal Microbiome (Taxa)	5-6 months	stool_microbiome_infant	0.00201789	0.00201789	0.212934	-0.0448292	0.470697	0.105052	Higher in SVN
infant_taxa_56	CAG.594.sp000434835	infant_taxa_56__CAG.594.sp000434835	Infant Fecal Microbiome (Taxa)	5-6 months	stool_microbiome_infant	0.00201789	0.00201789	0.212934	-0.0448292	0.470697	0.105052	Higher in SVN
infant_taxa_56	CAG.594.sp900547225	infant_taxa_56__CAG.594.sp900547225	Infant Fecal Microbiome (Taxa)	5-6 months	stool_microbiome_infant	0.00201789	0.00201789	0.212934	-0.0448292	0.470697	0.105052	Higher in SVN
infant_taxa_56	Unknown_CAG.594	infant_taxa_56__Unknown_CAG.594	Infant Fecal Microbiome (Taxa)	5-6 months	stool_microbiome_infant	0.00201789	0.00201789	0.212934	-0.0448292	0.470697	0.105052	Higher in SVN
infant_taxa_56	Unknown_CAG.594.1	infant_taxa_56__Unknown_CAG.594.1	Infant Fecal Microbiome (Taxa)	5-6 months	stool_microbiome_infant	0.00201789	0.00201789	0.212934	-0.0448292	0.470697	0.105052	Higher in SVN
infant_taxa_56	Unknown_CAG.594.2	infant_taxa_56__Unknown_CAG.594.2	Infant Fecal Microbiome (Taxa)	5-6 months	stool_microbiome_infant	0.00201789	0.00201789	0.212934	-0.0448292	0.470697	0.105052	Higher in SVN
infant_taxa_56	Unknown_CAG.594.3	infant_taxa_56__Unknown_CAG.594.3	Infant Fecal Microbiome (Taxa)	5-6 months	stool_microbiome_infant	0.00201789	0.00201789	0.212934	-0.0448292	0.470697	0.105052	Higher in SVN
infant_taxa_56	Unknown_CAG.594.4	infant_taxa_56__Unknown_CAG.594.4	Infant Fecal Microbiome (Taxa)	5-6 months	stool_microbiome_infant	0.00201789	0.00201789	0.212934	-0.0448292	0.470697	0.105052	Higher in SVN
infant_taxa_56	Unknown_CAG.594.5	infant_taxa_56__Unknown_CAG.594.5	Infant Fecal Microbiome (Taxa)	5-6 months	stool_microbiome_infant	0.00201789	0.00201789	0.212934	-0.0448292	0.470697	0.105052	Higher in SVN
infant_taxa_56	Unknown_CAG.594.6	infant_taxa_56__Unknown_CAG.594.6	Infant Fecal Microbiome (Taxa)	5-6 months	stool_microbiome_infant	0.00201789	0.00201789	0.212934	-0.0448292	0.470697	0.105052	Higher in SVN
infant_taxa_56	Unknown_CAG.594.7	infant_taxa_56__Unknown_CAG.594.7	Infant Fecal Microbiome (Taxa)	5-6 months	stool_microbiome_infant	0.00201789	0.00201789	0.212934	-0.0448292	0.470697	0.105052	Higher in SVN
infant_taxa_56	Unknown_CAG.433_2	infant_taxa_56__Unknown_CAG.433_2	Infant Fecal Microbiome (Taxa)	5-6 months	stool_microbiome_infant	0.00201789	0.00201789	0.212934	-0.0448292	0.470697	0.105052	Higher in SVN
infant_taxa_56	Unknown_CAG.433_2.1	infant_taxa_56__Unknown_CAG.433_2.1	Infant Fecal Microbiome (Taxa)	5-6 months	stool_microbiome_infant	0.00201789	0.00201789	0.212934	-0.0448292	0.470697	0.105052	Higher in SVN
infant_taxa_56	CAG.417.sp000432835	infant_taxa_56__CAG.417.sp000432835	Infant Fecal Microbiome (Taxa)	5-6 months	stool_microbiome_infant	0.00201789	0.00201789	0.212934	-0.0448292	0.470697	0.105052	Higher in SVN
infant_taxa_56	CAG.451.sp000438295	infant_taxa_56__CAG.451.sp000438295	Infant Fecal Microbiome (Taxa)	5-6 months	stool_microbiome_infant	0.00201789	0.00201789	0.212934	-0.0448292	0.470697	0.105052	Higher in SVN
infant_taxa_56	Unknown_CAG.451	infant_taxa_56__Unknown_CAG.451	Infant Fecal Microbiome (Taxa)	5-6 months	stool_microbiome_infant	0.00201789	0.00201789	0.212934	-0.0448292	0.470697	0.105052	Higher in SVN
infant_taxa_56	Unknown_CAG.451.1	infant_taxa_56__Unknown_CAG.451.1	Infant Fecal Microbiome (Taxa)	5-6 months	stool_microbiome_infant	0.00201789	0.00201789	0.212934	-0.0448292	0.470697	0.105052	Higher in SVN
infant_taxa_56	Unknown_CAG.451.2	infant_taxa_56__Unknown_CAG.451.2	Infant Fecal Microbiome (Taxa)	5-6 months	stool_microbiome_infant	0.00201789	0.00201789	0.212934	-0.0448292	0.470697	0.105052	Higher in SVN
infant_taxa_56	Unknown_CAG.451.3	infant_taxa_56__Unknown_CAG.451.3	Infant Fecal Microbiome (Taxa)	5-6 months	stool_microbiome_infant	0.00201789	0.00201789	0.212934	-0.0448292	0.470697	0.105052	Higher in SVN
infant_taxa_56	Unknown_CAG.451.4	infant_taxa_56__Unknown_CAG.451.4	Infant Fecal Microbiome (Taxa)	5-6 months	stool_microbiome_infant	0.00201789	0.00201789	0.212934	-0.0448292	0.470697	0.105052	Higher in SVN
infant_taxa_56	Unknown_CAG.451.5	infant_taxa_56__Unknown_CAG.451.5	Infant Fecal Microbiome (Taxa)	5-6 months	stool_microbiome_infant	0.00201789	0.00201789	0.212934	-0.0448292	0.470697	0.105052	Higher in SVN
infant_taxa_56	Unknown_CAG.451.6	infant_taxa_56__Unknown_CAG.451.6	Infant Fecal Microbiome (Taxa)	5-6 months	stool_microbiome_infant	0.00201789	0.00201789	0.212934	-0.0448292	0.470697	0.105052	Higher in SVN
infant_taxa_56	Unknown_CAG.451.7	infant_taxa_56__Unknown_CAG.451.7	Infant Fecal Microbiome (Taxa)	5-6 months	stool_microbiome_infant	0.00201789	0.00201789	0.212934	-0.0448292	0.470697	0.105052	Higher in SVN
infant_taxa_56	Unknown_CAG.451.8	infant_taxa_56__Unknown_CAG.451.8	Infant Fecal Microbiome (Taxa)	5-6 months	stool_microbiome_infant	0.00201789	0.00201789	0.212934	-0.0448292	0.470697	0.105052	Higher in SVN
infant_taxa_56	Unknown_CAG.451.9	infant_taxa_56__Unknown_CAG.451.9	Infant Fecal Microbiome (Taxa)	5-6 months	stool_microbiome_infant	0.00201789	0.00201789	0.212934	-0.0448292	0.470697	0.105052	Higher in SVN
infant_taxa_56	CAG.611.sp000434175	infant_taxa_56__CAG.611.sp000434175	Infant Fecal Microbiome (Taxa)	5-6 months	stool_microbiome_infant	0.00201789	0.00201789	0.212934	-0.0448292	0.470697	0.105052	Higher in SVN
infant_taxa_56	CAG.611.sp900552235	infant_taxa_56__CAG.611.sp900552235	Infant Fecal Microbiome (Taxa)	5-6 months	stool_microbiome_infant	0.00201789	0.00201789	0.212934	-0.0448292	0.470697	0.105052	Higher in SVN
infant_taxa_56	Unknown_CAG.611_1	infant_taxa_56__Unknown_CAG.611_1	Infant Fecal Microbiome (Taxa)	5-6 months	stool_microbiome_infant	0.00201789	0.00201789	0.212934	-0.0448292	0.470697	0.105052	Higher in SVN
infant_taxa_56	Unknown_CAG.611_1.1	infant_taxa_56__Unknown_CAG.611_1.1	Infant Fecal Microbiome (Taxa)	5-6 months	stool_microbiome_infant	0.00201789	0.00201789	0.212934	-0.0448292	0.470697	0.105052	Higher in SVN
infant_taxa_56	Unknown_CAG.611_1.2	infant_taxa_56__Unknown_CAG.611_1.2	Infant Fecal Microbiome (Taxa)	5-6 months	stool_microbiome_infant	0.00201789	0.00201789	0.212934	-0.0448292	0.470697	0.105052	Higher in SVN
infant_taxa_56	Unknown_CAG.611_1.3	infant_taxa_56__Unknown_CAG.611_1.3	Infant Fecal Microbiome (Taxa)	5-6 months	stool_microbiome_infant	0.00201789	0.00201789	0.212934	-0.0448292	0.470697	0.105052	Higher in SVN
infant_taxa_56	CAG.710.sp000432595	infant_taxa_56__CAG.710.sp000432595	Infant Fecal Microbiome (Taxa)	5-6 months	stool_microbiome_infant	0.00201789	0.00201789	0.212934	-0.0448292	0.470697	0.105052	Higher in SVN
infant_taxa_56	Unknown_CAG.710	infant_taxa_56__Unknown_CAG.710	Infant Fecal Microbiome (Taxa)	5-6 months	stool_microbiome_infant	0.00201789	0.00201789	0.212934	-0.0448292	0.470697	0.105052	Higher in SVN
infant_taxa_56	Unknown_CAG.710.1	infant_taxa_56__Unknown_CAG.710.1	Infant Fecal Microbiome (Taxa)	5-6 months	stool_microbiome_infant	0.00201789	0.00201789	0.212934	-0.0448292	0.470697	0.105052	Higher in SVN
infant_taxa_56	Unknown_CAG.710.2	infant_taxa_56__Unknown_CAG.710.2	Infant Fecal Microbiome (Taxa)	5-6 months	stool_microbiome_infant	0.00201789	0.00201789	0.212934	-0.0448292	0.470697	0.105052	Higher in SVN
infant_taxa_56	Unknown_CAG.710.3	infant_taxa_56__Unknown_CAG.710.3	Infant Fecal Microbiome (Taxa)	5-6 months	stool_microbiome_infant	0.00201789	0.00201789	0.212934	-0.0448292	0.470697	0.105052	Higher in SVN
infant_taxa_56	Unknown_CAG.710.4	infant_taxa_56__Unknown_CAG.710.4	Infant Fecal Microbiome (Taxa)	5-6 months	stool_microbiome_infant	0.00201789	0.00201789	0.212934	-0.0448292	0.470697	0.105052	Higher in SVN
infant_taxa_56	CAG.877.sp000433455	infant_taxa_56__CAG.877.sp000433455	Infant Fecal Microbiome (Taxa)	5-6 months	stool_microbiome_infant	0.00201789	0.00201789	0.212934	-0.0448292	0.470697	0.105052	Higher in SVN
infant_taxa_56	Unknown_CAG.877	infant_taxa_56__Unknown_CAG.877	Infant Fecal Microbiome (Taxa)	5-6 months	stool_microbiome_infant	0.00201789	0.00201789	0.212934	-0.0448292	0.470697	0.105052	Higher in SVN
infant_taxa_56	Unknown_CAG.877.1	infant_taxa_56__Unknown_CAG.877.1	Infant Fecal Microbiome (Taxa)	5-6 months	stool_microbiome_infant	0.00201789	0.00201789	0.212934	-0.0448292	0.470697	0.105052	Higher in SVN
infant_taxa_56	Unknown_CAG.877.2	infant_taxa_56__Unknown_CAG.877.2	Infant Fecal Microbiome (Taxa)	5-6 months	stool_microbiome_infant	0.00201789	0.00201789	0.212934	-0.0448292	0.470697	0.105052	Higher in SVN
infant_taxa_56	Unknown_CAG.877.3	infant_taxa_56__Unknown_CAG.877.3	Infant Fecal Microbiome (Taxa)	5-6 months	stool_microbiome_infant	0.00201789	0.00201789	0.212934	-0.0448292	0.470697	0.105052	Higher in SVN
infant_taxa_56	Unknown_CAG.877.4	infant_taxa_56__Unknown_CAG.877.4	Infant Fecal Microbiome (Taxa)	5-6 months	stool_microbiome_infant	0.00201789	0.00201789	0.212934	-0.0448292	0.470697	0.105052	Higher in SVN
infant_taxa_56	Unknown_CAG.877.5	infant_taxa_56__Unknown_CAG.877.5	Infant Fecal Microbiome (Taxa)	5-6 months	stool_microbiome_infant	0.00201789	0.00201789	0.212934	-0.0448292	0.470697	0.105052	Higher in SVN
infant_taxa_56	Unknown_CAG.877.6	infant_taxa_56__Unknown_CAG.877.6	Infant Fecal Microbiome (Taxa)	5-6 months	stool_microbiome_infant	0.00201789	0.00201789	0.212934	-0.0448292	0.470697	0.105052	Higher in SVN
infant_taxa_56	Unknown_CAG.877.7	infant_taxa_56__Unknown_CAG.877.7	Infant Fecal Microbiome (Taxa)	5-6 months	stool_microbiome_infant	0.00201789	0.00201789	0.212934	-0.0448292	0.470697	0.105052	Higher in SVN
infant_taxa_56	Unknown_CAG.877.8	infant_taxa_56__Unknown_CAG.877.8	Infant Fecal Microbiome (Taxa)	5-6 months	stool_microbiome_infant	0.00201789	0.00201789	0.212934	-0.0448292	0.470697	0.105052	Higher in SVN
infant_taxa_56	Unknown_CAG.877.9	infant_taxa_56__Unknown_CAG.877.9	Infant Fecal Microbiome (Taxa)	5-6 months	stool_microbiome_infant	0.00201789	0.00201789	0.212934	-0.0448292	0.470697	0.105052	Higher in SVN
infant_taxa_56	Unknown_CAG.877.10	infant_taxa_56__Unknown_CAG.877.10	Infant Fecal Microbiome (Taxa)	5-6 months	stool_microbiome_infant	0.00201789	0.00201789	0.212934	-0.0448292	0.470697	0.105052	Higher in SVN
infant_taxa_56	Unknown_RUG591	infant_taxa_56__Unknown_RUG591	Infant Fecal Microbiome (Taxa)	5-6 months	stool_microbiome_infant	0.00201789	0.00201789	0.212934	-0.0448292	0.470697	0.105052	Higher in SVN
infant_taxa_56	Unknown_RUG591.1	infant_taxa_56__Unknown_RUG591.1	Infant Fecal Microbiome (Taxa)	5-6 months	stool_microbiome_infant	0.00201789	0.00201789	0.212934	-0.0448292	0.470697	0.105052	Higher in SVN
infant_taxa_56	Unknown_RUG591.2	infant_taxa_56__Unknown_RUG591.2	Infant Fecal Microbiome (Taxa)	5-6 months	stool_microbiome_infant	0.00201789	0.00201789	0.212934	-0.0448292	0.470697	0.105052	Higher in SVN
infant_taxa_56	Unknown_RUG591.3	infant_taxa_56__Unknown_RUG591.3	Infant Fecal Microbiome (Taxa)	5-6 months	stool_microbiome_infant	0.00201789	0.00201789	0.212934	-0.0448292	0.470697	0.105052	Higher in SVN
infant_taxa_56	Unknown_UBA2730	infant_taxa_56__Unknown_UBA2730	Infant Fecal Microbiome (Taxa)	5-6 months	stool_microbiome_infant	0.00201789	0.00201789	0.212934	-0.0448292	0.470697	0.105052	Higher in SVN
infant_taxa_56	UBA3789.sp900543055	infant_taxa_56__UBA3789.sp900543055	Infant Fecal Microbiome (Taxa)	5-6 months	stool_microbiome_infant	0.00201789	0.00201789	0.212934	-0.0448292	0.470697	0.105052	Higher in SVN
infant_taxa_56	Unknown_UBA3789	infant_taxa_56__Unknown_UBA3789	Infant Fecal Microbiome (Taxa)	5-6 months	stool_microbiome_infant	0.00201789	0.00201789	0.212934	-0.0448292	0.470697	0.105052	Higher in SVN
infant_taxa_56	Unknown_UBA3789.1	infant_taxa_56__Unknown_UBA3789.1	Infant Fecal Microbiome (Taxa)	5-6 months	stool_microbiome_infant	0.00201789	0.00201789	0.212934	-0.0448292	0.470697	0.105052	Higher in SVN
infant_taxa_56	UBA7057.sp900542735	infant_taxa_56__UBA7057.sp900542735	Infant Fecal Microbiome (Taxa)	5-6 months	stool_microbiome_infant	0.00201789	0.00201789	0.212934	-0.0448292	0.470697	0.105052	Higher in SVN
infant_taxa_56	Unknown_UBA7057	infant_taxa_56__Unknown_UBA7057	Infant Fecal Microbiome (Taxa)	5-6 months	stool_microbiome_infant	0.00201789	0.00201789	0.212934	-0.0448292	0.470697	0.105052	Higher in SVN
infant_taxa_56	Unknown_UBA7057.1	infant_taxa_56__Unknown_UBA7057.1	Infant Fecal Microbiome (Taxa)	5-6 months	stool_microbiome_infant	0.00201789	0.00201789	0.212934	-0.0448292	0.470697	0.105052	Higher in SVN
infant_taxa_56	Unknown_UBA7057.2	infant_taxa_56__Unknown_UBA7057.2	Infant Fecal Microbiome (Taxa)	5-6 months	stool_microbiome_infant	0.00201789	0.00201789	0.212934	-0.0448292	0.470697	0.105052	Higher in SVN
infant_taxa_56	Unknown_UBA7057.3	infant_taxa_56__Unknown_UBA7057.3	Infant Fecal Microbiome (Taxa)	5-6 months	stool_microbiome_infant	0.00201789	0.00201789	0.212934	-0.0448292	0.470697	0.105052	Higher in SVN
infant_taxa_56	Unknown_UBA7057.4	infant_taxa_56__Unknown_UBA7057.4	Infant Fecal Microbiome (Taxa)	5-6 months	stool_microbiome_infant	0.00201789	0.00201789	0.212934	-0.0448292	0.470697	0.105052	Higher in SVN
infant_taxa_56	Unknown_UMGS1449	infant_taxa_56__Unknown_UMGS1449	Infant Fecal Microbiome (Taxa)	5-6 months	stool_microbiome_infant	0.00201789	0.00201789	0.212934	-0.0448292	0.470697	0.105052	Higher in SVN
infant_taxa_56	Unknown_UMGS1449.1	infant_taxa_56__Unknown_UMGS1449.1	Infant Fecal Microbiome (Taxa)	5-6 months	stool_microbiome_infant	0.00201789	0.00201789	0.212934	-0.0448292	0.470697	0.105052	Higher in SVN
infant_taxa_56	Unknown_UMGS1449.2	infant_taxa_56__Unknown_UMGS1449.2	Infant Fecal Microbiome (Taxa)	5-6 months	stool_microbiome_infant	0.00201789	0.00201789	0.212934	-0.0448292	0.470697	0.105052	Higher in SVN
infant_taxa_56	Unknown_UMGS1449.3	infant_taxa_56__Unknown_UMGS1449.3	Infant Fecal Microbiome (Taxa)	5-6 months	stool_microbiome_infant	0.00201789	0.00201789	0.212934	-0.0448292	0.470697	0.105052	Higher in SVN
infant_taxa_56	Unknown_UMGS1449.4	infant_taxa_56__Unknown_UMGS1449.4	Infant Fecal Microbiome (Taxa)	5-6 months	stool_microbiome_infant	0.00201789	0.00201789	0.212934	-0.0448292	0.470697	0.105052	Higher in SVN
infant_taxa_56	Unknown_UMGS1449.5	infant_taxa_56__Unknown_UMGS1449.5	Infant Fecal Microbiome (Taxa)	5-6 months	stool_microbiome_infant	0.00201789	0.00201789	0.212934	-0.0448292	0.470697	0.105052	Higher in SVN
infant_taxa_56	Unknown_UMGS1449.6	infant_taxa_56__Unknown_UMGS1449.6	Infant Fecal Microbiome (Taxa)	5-6 months	stool_microbiome_infant	0.00201789	0.00201789	0.212934	-0.0448292	0.470697	0.105052	Higher in SVN
infant_taxa_56	Unknown_UMGS1449.7	infant_taxa_56__Unknown_UMGS1449.7	Infant Fecal Microbiome (Taxa)	5-6 months	stool_microbiome_infant	0.00201789	0.00201789	0.212934	-0.0448292	0.470697	0.105052	Higher in SVN
infant_taxa_56	Unknown_UMGS1572	infant_taxa_56__Unknown_UMGS1572	Infant Fecal Microbiome (Taxa)	5-6 months	stool_microbiome_infant	0.00201789	0.00201789	0.212934	-0.0448292	0.470697	0.105052	Higher in SVN
infant_taxa_56	UMGS995.sp900547465	infant_taxa_56__UMGS995.sp900547465	Infant Fecal Microbiome (Taxa)	5-6 months	stool_microbiome_infant	0.00201789	0.00201789	0.212934	-0.0448292	0.470697	0.105052	Higher in SVN
infant_taxa_56	Unknown_UMGS995	infant_taxa_56__Unknown_UMGS995	Infant Fecal Microbiome (Taxa)	5-6 months	stool_microbiome_infant	0.00201789	0.00201789	0.212934	-0.0448292	0.470697	0.105052	Higher in SVN
infant_taxa_56	Unknown_UMGS995.1	infant_taxa_56__Unknown_UMGS995.1	Infant Fecal Microbiome (Taxa)	5-6 months	stool_microbiome_infant	0.00201789	0.00201789	0.212934	-0.0448292	0.470697	0.105052	Higher in SVN
infant_taxa_56	Unknown_UMGS995.2	infant_taxa_56__Unknown_UMGS995.2	Infant Fecal Microbiome (Taxa)	5-6 months	stool_microbiome_infant	0.00201789	0.00201789	0.212934	-0.0448292	0.470697	0.105052	Higher in SVN
infant_taxa_56	Unknown_UMGS995.3	infant_taxa_56__Unknown_UMGS995.3	Infant Fecal Microbiome (Taxa)	5-6 months	stool_microbiome_infant	0.00201789	0.00201789	0.212934	-0.0448292	0.470697	0.105052	Higher in SVN
infant_taxa_56	Unknown_CAG.611_2	infant_taxa_56__Unknown_CAG.611_2	Infant Fecal Microbiome (Taxa)	5-6 months	stool_microbiome_infant	0.00201789	0.00201789	0.212934	-0.0448292	0.470697	0.105052	Higher in SVN
infant_taxa_56	Unknown_CAG.822_1	infant_taxa_56__Unknown_CAG.822_1	Infant Fecal Microbiome (Taxa)	5-6 months	stool_microbiome_infant	0.00201789	0.00201789	0.212934	-0.0448292	0.470697	0.105052	Higher in SVN
infant_taxa_56	Unknown_CAG.822_1.1	infant_taxa_56__Unknown_CAG.822_1.1	Infant Fecal Microbiome (Taxa)	5-6 months	stool_microbiome_infant	0.00201789	0.00201789	0.212934	-0.0448292	0.470697	0.105052	Higher in SVN
infant_taxa_56	Unknown_CAG.822_1.2	infant_taxa_56__Unknown_CAG.822_1.2	Infant Fecal Microbiome (Taxa)	5-6 months	stool_microbiome_infant	0.00201789	0.00201789	0.212934	-0.0448292	0.470697	0.105052	Higher in SVN
infant_taxa_56	CAG.878.sp000432255	infant_taxa_56__CAG.878.sp000432255	Infant Fecal Microbiome (Taxa)	5-6 months	stool_microbiome_infant	0.00201789	0.00201789	0.212934	-0.0448292	0.470697	0.105052	Higher in SVN
infant_taxa_56	Unknown_CAG.878	infant_taxa_56__Unknown_CAG.878	Infant Fecal Microbiome (Taxa)	5-6 months	stool_microbiome_infant	0.00201789	0.00201789	0.212934	-0.0448292	0.470697	0.105052	Higher in SVN
infant_taxa_56	CAG.884.sp000433875	infant_taxa_56__CAG.884.sp000433875	Infant Fecal Microbiome (Taxa)	5-6 months	stool_microbiome_infant	0.00201789	0.00201789	0.212934	-0.0448292	0.470697	0.105052	Higher in SVN
infant_taxa_56	Unknown_CAG.884	infant_taxa_56__Unknown_CAG.884	Infant Fecal Microbiome (Taxa)	5-6 months	stool_microbiome_infant	0.00201789	0.00201789	0.212934	-0.0448292	0.470697	0.105052	Higher in SVN
infant_taxa_56	Unknown_CAG.884.1	infant_taxa_56__Unknown_CAG.884.1	Infant Fecal Microbiome (Taxa)	5-6 months	stool_microbiome_infant	0.00201789	0.00201789	0.212934	-0.0448292	0.470697	0.105052	Higher in SVN
infant_taxa_56	Unknown_CAG.884.2	infant_taxa_56__Unknown_CAG.884.2	Infant Fecal Microbiome (Taxa)	5-6 months	stool_microbiome_infant	0.00201789	0.00201789	0.212934	-0.0448292	0.470697	0.105052	Higher in SVN
infant_taxa_56	Unknown_CAG.884.3	infant_taxa_56__Unknown_CAG.884.3	Infant Fecal Microbiome (Taxa)	5-6 months	stool_microbiome_infant	0.00201789	0.00201789	0.212934	-0.0448292	0.470697	0.105052	Higher in SVN
infant_taxa_56	Unknown_CAG.884.4	infant_taxa_56__Unknown_CAG.884.4	Infant Fecal Microbiome (Taxa)	5-6 months	stool_microbiome_infant	0.00201789	0.00201789	0.212934	-0.0448292	0.470697	0.105052	Higher in SVN
infant_taxa_56	Unknown_CAG.884.5	infant_taxa_56__Unknown_CAG.884.5	Infant Fecal Microbiome (Taxa)	5-6 months	stool_microbiome_infant	0.00201789	0.00201789	0.212934	-0.0448292	0.470697	0.105052	Higher in SVN
infant_taxa_56	UBA3631.sp900544605	infant_taxa_56__UBA3631.sp900544605	Infant Fecal Microbiome (Taxa)	5-6 months	stool_microbiome_infant	0.00201789	0.00201789	0.212934	-0.0448292	0.470697	0.105052	Higher in SVN
infant_taxa_56	UBA3631.sp900546275	infant_taxa_56__UBA3631.sp900546275	Infant Fecal Microbiome (Taxa)	5-6 months	stool_microbiome_infant	0.00201789	0.00201789	0.212934	-0.0448292	0.470697	0.105052	Higher in SVN
infant_taxa_56	Unknown_UBA3631	infant_taxa_56__Unknown_UBA3631	Infant Fecal Microbiome (Taxa)	5-6 months	stool_microbiome_infant	0.00201789	0.00201789	0.212934	-0.0448292	0.470697	0.105052	Higher in SVN
infant_taxa_56	Unknown_UBA3631.1	infant_taxa_56__Unknown_UBA3631.1	Infant Fecal Microbiome (Taxa)	5-6 months	stool_microbiome_infant	0.00201789	0.00201789	0.212934	-0.0448292	0.470697	0.105052	Higher in SVN
infant_taxa_56	Unknown_UBA3631.2	infant_taxa_56__Unknown_UBA3631.2	Infant Fecal Microbiome (Taxa)	5-6 months	stool_microbiome_infant	0.00201789	0.00201789	0.212934	-0.0448292	0.470697	0.105052	Higher in SVN
infant_taxa_56	UBA5026.sp900546745	infant_taxa_56__UBA5026.sp900546745	Infant Fecal Microbiome (Taxa)	5-6 months	stool_microbiome_infant	0.00201789	0.00201789	0.212934	-0.0448292	0.470697	0.105052	Higher in SVN
infant_taxa_56	UBA5026.sp900550255	infant_taxa_56__UBA5026.sp900550255	Infant Fecal Microbiome (Taxa)	5-6 months	stool_microbiome_infant	0.00201789	0.00201789	0.212934	-0.0448292	0.470697	0.105052	Higher in SVN
infant_taxa_56	UBA5026.sp900552335	infant_taxa_56__UBA5026.sp900552335	Infant Fecal Microbiome (Taxa)	5-6 months	stool_microbiome_infant	0.00201789	0.00201789	0.212934	-0.0448292	0.470697	0.105052	Higher in SVN
infant_taxa_56	UBA5026.sp900557305	infant_taxa_56__UBA5026.sp900557305	Infant Fecal Microbiome (Taxa)	5-6 months	stool_microbiome_infant	0.00201789	0.00201789	0.212934	-0.0448292	0.470697	0.105052	Higher in SVN
infant_taxa_56	Unknown_UBA5026	infant_taxa_56__Unknown_UBA5026	Infant Fecal Microbiome (Taxa)	5-6 months	stool_microbiome_infant	0.00201789	0.00201789	0.212934	-0.0448292	0.470697	0.105052	Higher in SVN
infant_taxa_56	Unknown_UBA5026.1	infant_taxa_56__Unknown_UBA5026.1	Infant Fecal Microbiome (Taxa)	5-6 months	stool_microbiome_infant	0.00201789	0.00201789	0.212934	-0.0448292	0.470697	0.105052	Higher in SVN
infant_taxa_56	Unknown_UBA5026.2	infant_taxa_56__Unknown_UBA5026.2	Infant Fecal Microbiome (Taxa)	5-6 months	stool_microbiome_infant	0.00201789	0.00201789	0.212934	-0.0448292	0.470697	0.105052	Higher in SVN
infant_taxa_56	Unknown_UBA5026.3	infant_taxa_56__Unknown_UBA5026.3	Infant Fecal Microbiome (Taxa)	5-6 months	stool_microbiome_infant	0.00201789	0.00201789	0.212934	-0.0448292	0.470697	0.105052	Higher in SVN
infant_taxa_56	Unknown_UBA5026.4	infant_taxa_56__Unknown_UBA5026.4	Infant Fecal Microbiome (Taxa)	5-6 months	stool_microbiome_infant	0.00201789	0.00201789	0.212934	-0.0448292	0.470697	0.105052	Higher in SVN
infant_taxa_56	Unknown_UBA5026.5	infant_taxa_56__Unknown_UBA5026.5	Infant Fecal Microbiome (Taxa)	5-6 months	stool_microbiome_infant	0.00201789	0.00201789	0.212934	-0.0448292	0.470697	0.105052	Higher in SVN
infant_taxa_56	Unknown_UBA5026.6	infant_taxa_56__Unknown_UBA5026.6	Infant Fecal Microbiome (Taxa)	5-6 months	stool_microbiome_infant	0.00201789	0.00201789	0.212934	-0.0448292	0.470697	0.105052	Higher in SVN
infant_taxa_56	Unknown_UBA5026.7	infant_taxa_56__Unknown_UBA5026.7	Infant Fecal Microbiome (Taxa)	5-6 months	stool_microbiome_infant	0.00201789	0.00201789	0.212934	-0.0448292	0.470697	0.105052	Higher in SVN
infant_taxa_56	Unknown_UBA5026.8	infant_taxa_56__Unknown_UBA5026.8	Infant Fecal Microbiome (Taxa)	5-6 months	stool_microbiome_infant	0.00201789	0.00201789	0.212934	-0.0448292	0.470697	0.105052	Higher in SVN
infant_taxa_56	Unknown_UBA5026.9	infant_taxa_56__Unknown_UBA5026.9	Infant Fecal Microbiome (Taxa)	5-6 months	stool_microbiome_infant	0.00201789	0.00201789	0.212934	-0.0448292	0.470697	0.105052	Higher in SVN
infant_taxa_56	Unknown_UBA5026.10	infant_taxa_56__Unknown_UBA5026.10	Infant Fecal Microbiome (Taxa)	5-6 months	stool_microbiome_infant	0.00201789	0.00201789	0.212934	-0.0448292	0.470697	0.105052	Higher in SVN
infant_taxa_56	Unknown_UBA5026.11	infant_taxa_56__Unknown_UBA5026.11	Infant Fecal Microbiome (Taxa)	5-6 months	stool_microbiome_infant	0.00201789	0.00201789	0.212934	-0.0448292	0.470697	0.105052	Higher in SVN
infant_taxa_56	Unknown_UBA5364	infant_taxa_56__Unknown_UBA5364	Infant Fecal Microbiome (Taxa)	5-6 months	stool_microbiome_infant	0.00201789	0.00201789	0.212934	-0.0448292	0.470697	0.105052	Higher in SVN
infant_taxa_56	UBA5578.sp900553395	infant_taxa_56__UBA5578.sp900553395	Infant Fecal Microbiome (Taxa)	5-6 months	stool_microbiome_infant	0.00201789	0.00201789	0.212934	-0.0448292	0.470697	0.105052	Higher in SVN
infant_taxa_56	Unknown_UBA5578	infant_taxa_56__Unknown_UBA5578	Infant Fecal Microbiome (Taxa)	5-6 months	stool_microbiome_infant	0.00201789	0.00201789	0.212934	-0.0448292	0.470697	0.105052	Higher in SVN
infant_taxa_56	Unknown_UBA5578.1	infant_taxa_56__Unknown_UBA5578.1	Infant Fecal Microbiome (Taxa)	5-6 months	stool_microbiome_infant	0.00201789	0.00201789	0.212934	-0.0448292	0.470697	0.105052	Higher in SVN
infant_taxa_56	Unknown_UBA5578.2	infant_taxa_56__Unknown_UBA5578.2	Infant Fecal Microbiome (Taxa)	5-6 months	stool_microbiome_infant	0.00201789	0.00201789	0.212934	-0.0448292	0.470697	0.105052	Higher in SVN
infant_taxa_56	Unknown_UBA5578.3	infant_taxa_56__Unknown_UBA5578.3	Infant Fecal Microbiome (Taxa)	5-6 months	stool_microbiome_infant	0.00201789	0.00201789	0.212934	-0.0448292	0.470697	0.105052	Higher in SVN
infant_taxa_56	UMGS1045.sp900547995	infant_taxa_56__UMGS1045.sp900547995	Infant Fecal Microbiome (Taxa)	5-6 months	stool_microbiome_infant	0.00201789	0.00201789	0.212934	-0.0448292	0.470697	0.105052	Higher in SVN
infant_taxa_56	Unknown_UMGS1045	infant_taxa_56__Unknown_UMGS1045	Infant Fecal Microbiome (Taxa)	5-6 months	stool_microbiome_infant	0.00201789	0.00201789	0.212934	-0.0448292	0.470697	0.105052	Higher in SVN
infant_taxa_56	Unknown_UMGS1045.1	infant_taxa_56__Unknown_UMGS1045.1	Infant Fecal Microbiome (Taxa)	5-6 months	stool_microbiome_infant	0.00201789	0.00201789	0.212934	-0.0448292	0.470697	0.105052	Higher in SVN
infant_taxa_56	Unknown_UMGS1045.2	infant_taxa_56__Unknown_UMGS1045.2	Infant Fecal Microbiome (Taxa)	5-6 months	stool_microbiome_infant	0.00201789	0.00201789	0.212934	-0.0448292	0.470697	0.105052	Higher in SVN
infant_taxa_56	Unknown_UMGS1045.3	infant_taxa_56__Unknown_UMGS1045.3	Infant Fecal Microbiome (Taxa)	5-6 months	stool_microbiome_infant	0.00201789	0.00201789	0.212934	-0.0448292	0.470697	0.105052	Higher in SVN
infant_taxa_56	Unknown_CAG.822_2	infant_taxa_56__Unknown_CAG.822_2	Infant Fecal Microbiome (Taxa)	5-6 months	stool_microbiome_infant	0.00201789	0.00201789	0.212934	-0.0448292	0.470697	0.105052	Higher in SVN
infant_taxa_56	CAG.1193.sp000436255	infant_taxa_56__CAG.1193.sp000436255	Infant Fecal Microbiome (Taxa)	5-6 months	stool_microbiome_infant	0.00201789	0.00201789	0.212934	-0.0448292	0.470697	0.105052	Higher in SVN
infant_taxa_56	CAG.1193.sp900550145	infant_taxa_56__CAG.1193.sp900550145	Infant Fecal Microbiome (Taxa)	5-6 months	stool_microbiome_infant	0.00201789	0.00201789	0.212934	-0.0448292	0.470697	0.105052	Higher in SVN
infant_taxa_56	Unknown_CAG.1193	infant_taxa_56__Unknown_CAG.1193	Infant Fecal Microbiome (Taxa)	5-6 months	stool_microbiome_infant	0.00201789	0.00201789	0.212934	-0.0448292	0.470697	0.105052	Higher in SVN
infant_taxa_56	CAG.288.sp000437395	infant_taxa_56__CAG.288.sp000437395	Infant Fecal Microbiome (Taxa)	5-6 months	stool_microbiome_infant	0.00201789	0.00201789	0.212934	-0.0448292	0.470697	0.105052	Higher in SVN
infant_taxa_56	CAG.345.sp000433315	infant_taxa_56__CAG.345.sp000433315	Infant Fecal Microbiome (Taxa)	5-6 months	stool_microbiome_infant	0.00201789	0.00201789	0.212934	-0.0448292	0.470697	0.105052	Higher in SVN
infant_taxa_56	CAG.568.sp000434395	infant_taxa_56__CAG.568.sp000434395	Infant Fecal Microbiome (Taxa)	5-6 months	stool_microbiome_infant	0.00201789	0.00201789	0.212934	-0.0448292	0.470697	0.105052	Higher in SVN
infant_taxa_56	UBA7642.sp900549915	infant_taxa_56__UBA7642.sp900549915	Infant Fecal Microbiome (Taxa)	5-6 months	stool_microbiome_infant	0.00201789	0.00201789	0.212934	-0.0448292	0.470697	0.105052	Higher in SVN
infant_taxa_56	Unknown_UBA7642	infant_taxa_56__Unknown_UBA7642	Infant Fecal Microbiome (Taxa)	5-6 months	stool_microbiome_infant	0.00201789	0.00201789	0.212934	-0.0448292	0.470697	0.105052	Higher in SVN
infant_taxa_56	Unknown_UBA7642.1	infant_taxa_56__Unknown_UBA7642.1	Infant Fecal Microbiome (Taxa)	5-6 months	stool_microbiome_infant	0.00201789	0.00201789	0.212934	-0.0448292	0.470697	0.105052	Higher in SVN
infant_taxa_56	Unknown_UBA7642.2	infant_taxa_56__Unknown_UBA7642.2	Infant Fecal Microbiome (Taxa)	5-6 months	stool_microbiome_infant	0.00201789	0.00201789	0.212934	-0.0448292	0.470697	0.105052	Higher in SVN
infant_taxa_56	CAG.449.sp000432895	infant_taxa_56__CAG.449.sp000432895	Infant Fecal Microbiome (Taxa)	5-6 months	stool_microbiome_infant	0.00201789	0.00201789	0.212934	-0.0448292	0.470697	0.105052	Higher in SVN
infant_taxa_56	CAG.449.sp900551385	infant_taxa_56__CAG.449.sp900551385	Infant Fecal Microbiome (Taxa)	5-6 months	stool_microbiome_infant	0.00201789	0.00201789	0.212934	-0.0448292	0.470697	0.105052	Higher in SVN
infant_taxa_56	Unknown_CAG.631	infant_taxa_56__Unknown_CAG.631	Infant Fecal Microbiome (Taxa)	5-6 months	stool_microbiome_infant	0.00201789	0.00201789	0.212934	-0.0448292	0.470697	0.105052	Higher in SVN
infant_taxa_56	Unknown_CAG.631.1	infant_taxa_56__Unknown_CAG.631.1	Infant Fecal Microbiome (Taxa)	5-6 months	stool_microbiome_infant	0.00201789	0.00201789	0.212934	-0.0448292	0.470697	0.105052	Higher in SVN
infant_taxa_56	Unknown_CAG.631.2	infant_taxa_56__Unknown_CAG.631.2	Infant Fecal Microbiome (Taxa)	5-6 months	stool_microbiome_infant	0.00201789	0.00201789	0.212934	-0.0448292	0.470697	0.105052	Higher in SVN
infant_taxa_56	CAG.826.sp000437235	infant_taxa_56__CAG.826.sp000437235	Infant Fecal Microbiome (Taxa)	5-6 months	stool_microbiome_infant	0.00201789	0.00201789	0.212934	-0.0448292	0.470697	0.105052	Higher in SVN
infant_taxa_56	RUG131.sp900315885	infant_taxa_56__RUG131.sp900315885	Infant Fecal Microbiome (Taxa)	5-6 months	stool_microbiome_infant	0.00201789	0.00201789	0.212934	-0.0448292	0.470697	0.105052	Higher in SVN
infant_taxa_56	RUG131.sp900549975	infant_taxa_56__RUG131.sp900549975	Infant Fecal Microbiome (Taxa)	5-6 months	stool_microbiome_infant	0.00201789	0.00201789	0.212934	-0.0448292	0.470697	0.105052	Higher in SVN
infant_taxa_56	Unknown_RUG131	infant_taxa_56__Unknown_RUG131	Infant Fecal Microbiome (Taxa)	5-6 months	stool_microbiome_infant	0.00201789	0.00201789	0.212934	-0.0448292	0.470697	0.105052	Higher in SVN
infant_taxa_56	Unknown_RUG131.1	infant_taxa_56__Unknown_RUG131.1	Infant Fecal Microbiome (Taxa)	5-6 months	stool_microbiome_infant	0.00201789	0.00201789	0.212934	-0.0448292	0.470697	0.105052	Higher in SVN
infant_taxa_56	Unknown_RUG131.2	infant_taxa_56__Unknown_RUG131.2	Infant Fecal Microbiome (Taxa)	5-6 months	stool_microbiome_infant	0.00201789	0.00201789	0.212934	-0.0448292	0.470697	0.105052	Higher in SVN
infant_taxa_56	UBA4855.sp900545015	infant_taxa_56__UBA4855.sp900545015	Infant Fecal Microbiome (Taxa)	5-6 months	stool_microbiome_infant	0.00201789	0.00201789	0.212934	-0.0448292	0.470697	0.105052	Higher in SVN
infant_taxa_56	Unknown_UBA4855	infant_taxa_56__Unknown_UBA4855	Infant Fecal Microbiome (Taxa)	5-6 months	stool_microbiome_infant	0.00201789	0.00201789	0.212934	-0.0448292	0.470697	0.105052	Higher in SVN
infant_taxa_56	UBA4951.sp900540385	infant_taxa_56__UBA4951.sp900540385	Infant Fecal Microbiome (Taxa)	5-6 months	stool_microbiome_infant	0.00201789	0.00201789	0.212934	-0.0448292	0.470697	0.105052	Higher in SVN
infant_taxa_56	UBA733.sp900539595	infant_taxa_56__UBA733.sp900539595	Infant Fecal Microbiome (Taxa)	5-6 months	stool_microbiome_infant	0.00201789	0.00201789	0.212934	-0.0448292	0.470697	0.105052	Higher in SVN
infant_taxa_56	UBA733.sp900550795	infant_taxa_56__UBA733.sp900550795	Infant Fecal Microbiome (Taxa)	5-6 months	stool_microbiome_infant	0.00201789	0.00201789	0.212934	-0.0448292	0.470697	0.105052	Higher in SVN
infant_taxa_56	Unknown_UBA733	infant_taxa_56__Unknown_UBA733	Infant Fecal Microbiome (Taxa)	5-6 months	stool_microbiome_infant	0.00201789	0.00201789	0.212934	-0.0448292	0.470697	0.105052	Higher in SVN
infant_taxa_56	Unknown_UBA733.1	infant_taxa_56__Unknown_UBA733.1	Infant Fecal Microbiome (Taxa)	5-6 months	stool_microbiome_infant	0.00201789	0.00201789	0.212934	-0.0448292	0.470697	0.105052	Higher in SVN
infant_taxa_56	Unknown_UBA1709	infant_taxa_56__Unknown_UBA1709	Infant Fecal Microbiome (Taxa)	5-6 months	stool_microbiome_infant	0.00201789	0.00201789	0.212934	-0.0448292	0.470697	0.105052	Higher in SVN
infant_taxa_56	Gemella.morbillorum	infant_taxa_56__Gemella.morbillorum	Infant Fecal Microbiome (Taxa)	5-6 months	stool_microbiome_infant	0.00201789	0.00201789	0.212934	-0.0448292	0.470697	0.105052	Higher in SVN
infant_taxa_56	Unknown_Gemella	infant_taxa_56__Unknown_Gemella	Infant Fecal Microbiome (Taxa)	5-6 months	stool_microbiome_infant	0.00201789	0.00201789	0.212934	-0.0448292	0.470697	0.105052	Higher in SVN
infant_taxa_56	Staphylococcus.aureus	infant_taxa_56__Staphylococcus.aureus	Infant Fecal Microbiome (Taxa)	5-6 months	stool_microbiome_infant	0.00201789	0.00201789	-0.0744984	-0.333316	0.184319	0.571447	Lower in SVN
infant_taxa_56	Staphylococcus.hominis	infant_taxa_56__Staphylococcus.hominis	Infant Fecal Microbiome (Taxa)	5-6 months	stool_microbiome_infant	0.00201789	0.00201789	0.212934	-0.0448292	0.470697	0.105052	Higher in SVN
infant_taxa_56	Clostridium.celatum	infant_taxa_56__Clostridium.celatum	Infant Fecal Microbiome (Taxa)	5-6 months	stool_microbiome_infant	0.00201789	0.00201789	0.212934	-0.0448292	0.470697	0.105052	Higher in SVN
infant_taxa_56	Clostridium.saudiense	infant_taxa_56__Clostridium.saudiense	Infant Fecal Microbiome (Taxa)	5-6 months	stool_microbiome_infant	0.00201789	0.00201789	0.212934	-0.0448292	0.470697	0.105052	Higher in SVN
infant_taxa_56	Clostridium.sp000435835	infant_taxa_56__Clostridium.sp000435835	Infant Fecal Microbiome (Taxa)	5-6 months	stool_microbiome_infant	0.00201789	0.00201789	0.212934	-0.0448292	0.470697	0.105052	Higher in SVN
infant_taxa_56	Clostridium.sp001916075	infant_taxa_56__Clostridium.sp001916075	Infant Fecal Microbiome (Taxa)	5-6 months	stool_microbiome_infant	0.00201789	0.00201789	0.212934	-0.0448292	0.470697	0.105052	Higher in SVN
infant_taxa_56	Clostridium.sp900539375	infant_taxa_56__Clostridium.sp900539375	Infant Fecal Microbiome (Taxa)	5-6 months	stool_microbiome_infant	0.00201789	0.00201789	0.212934	-0.0448292	0.470697	0.105052	Higher in SVN
infant_taxa_56	Clostridium.sp900540255	infant_taxa_56__Clostridium.sp900540255	Infant Fecal Microbiome (Taxa)	5-6 months	stool_microbiome_infant	0.00201789	0.00201789	0.212934	-0.0448292	0.470697	0.105052	Higher in SVN
infant_taxa_56	Clostridium.tertium	infant_taxa_56__Clostridium.tertium	Infant Fecal Microbiome (Taxa)	5-6 months	stool_microbiome_infant	0.00201789	0.00201789	-0.0749106	-0.333727	0.183906	0.56932	Lower in SVN
infant_taxa_56	Unknown_Clostridium	infant_taxa_56__Unknown_Clostridium	Infant Fecal Microbiome (Taxa)	5-6 months	stool_microbiome_infant	0.00201789	0.00201789	0.212934	-0.0448292	0.470697	0.105052	Higher in SVN
infant_taxa_56	Unknown_Clostridium.1	infant_taxa_56__Unknown_Clostridium.1	Infant Fecal Microbiome (Taxa)	5-6 months	stool_microbiome_infant	0.00201789	0.00201789	0.212934	-0.0448292	0.470697	0.105052	Higher in SVN
infant_taxa_56	Clostridium_P.ventriculi	infant_taxa_56__Clostridium_P.ventriculi	Infant Fecal Microbiome (Taxa)	5-6 months	stool_microbiome_infant	0.00201789	0.00201789	0.212934	-0.0448292	0.470697	0.105052	Higher in SVN
infant_taxa_56	Unknown_Anaerofustaceae	infant_taxa_56__Unknown_Anaerofustaceae	Infant Fecal Microbiome (Taxa)	5-6 months	stool_microbiome_infant	0.00201789	0.00201789	0.212934	-0.0448292	0.470697	0.105052	Higher in SVN
infant_taxa_56	Anaerotignum.lactatifermentans	infant_taxa_56__Anaerotignum.lactatifermentans	Infant Fecal Microbiome (Taxa)	5-6 months	stool_microbiome_infant	0.00201789	0.00201789	0.212934	-0.0448292	0.470697	0.105052	Higher in SVN
infant_taxa_56	Anaerotignum.sp000436415	infant_taxa_56__Anaerotignum.sp000436415	Infant Fecal Microbiome (Taxa)	5-6 months	stool_microbiome_infant	0.00201789	0.00201789	0.212934	-0.0448292	0.470697	0.105052	Higher in SVN
infant_taxa_56	Unknown_Anaerotignum	infant_taxa_56__Unknown_Anaerotignum	Infant Fecal Microbiome (Taxa)	5-6 months	stool_microbiome_infant	0.00201789	0.00201789	0.212934	-0.0448292	0.470697	0.105052	Higher in SVN
infant_taxa_56	Unknown_UBA8514	infant_taxa_56__Unknown_UBA8514	Infant Fecal Microbiome (Taxa)	5-6 months	stool_microbiome_infant	0.00201789	0.00201789	0.212934	-0.0448292	0.470697	0.105052	Higher in SVN
infant_taxa_56	UMGS1670.sp900553995	infant_taxa_56__UMGS1670.sp900553995	Infant Fecal Microbiome (Taxa)	5-6 months	stool_microbiome_infant	0.00201789	0.00201789	0.212934	-0.0448292	0.470697	0.105052	Higher in SVN
infant_taxa_56	CAG.274.sp900545305	infant_taxa_56__CAG.274.sp900545305	Infant Fecal Microbiome (Taxa)	5-6 months	stool_microbiome_infant	0.00201789	0.00201789	0.212934	-0.0448292	0.470697	0.105052	Higher in SVN
infant_taxa_56	Niameybacter.sp900549765	infant_taxa_56__Niameybacter.sp900549765	Infant Fecal Microbiome (Taxa)	5-6 months	stool_microbiome_infant	0.00201789	0.00201789	0.212934	-0.0448292	0.470697	0.105052	Higher in SVN
infant_taxa_56	Unknown_14.Feb	infant_taxa_56__Unknown_14.Feb	Infant Fecal Microbiome (Taxa)	5-6 months	stool_microbiome_infant	0.00201789	0.00201789	0.212934	-0.0448292	0.470697	0.105052	Higher in SVN
infant_taxa_56	Unknown_1XD42.69	infant_taxa_56__Unknown_1XD42.69	Infant Fecal Microbiome (Taxa)	5-6 months	stool_microbiome_infant	0.00201789	0.00201789	0.212934	-0.0448292	0.470697	0.105052	Higher in SVN
infant_taxa_56	AM51.8.sp003478275	infant_taxa_56__AM51.8.sp003478275	Infant Fecal Microbiome (Taxa)	5-6 months	stool_microbiome_infant	0.00201789	0.00201789	0.212934	-0.0448292	0.470697	0.105052	Higher in SVN
infant_taxa_56	AM51.8.sp900546435	infant_taxa_56__AM51.8.sp900546435	Infant Fecal Microbiome (Taxa)	5-6 months	stool_microbiome_infant	0.00201789	0.00201789	0.212934	-0.0448292	0.470697	0.105052	Higher in SVN
infant_taxa_56	Unknown_AM51.8	infant_taxa_56__Unknown_AM51.8	Infant Fecal Microbiome (Taxa)	5-6 months	stool_microbiome_infant	0.00201789	0.00201789	0.212934	-0.0448292	0.470697	0.105052	Higher in SVN
infant_taxa_56	Unknown_AM51.8.1	infant_taxa_56__Unknown_AM51.8.1	Infant Fecal Microbiome (Taxa)	5-6 months	stool_microbiome_infant	0.00201789	0.00201789	0.212934	-0.0448292	0.470697	0.105052	Higher in SVN
infant_taxa_56	Acetatifactor.sp003447295	infant_taxa_56__Acetatifactor.sp003447295	Infant Fecal Microbiome (Taxa)	5-6 months	stool_microbiome_infant	0.00201789	0.00201789	0.212934	-0.0448292	0.470697	0.105052	Higher in SVN
infant_taxa_56	Acetatifactor.sp900066365	infant_taxa_56__Acetatifactor.sp900066365	Infant Fecal Microbiome (Taxa)	5-6 months	stool_microbiome_infant	0.00201789	0.00201789	0.212934	-0.0448292	0.470697	0.105052	Higher in SVN
infant_taxa_56	Acetatifactor.sp900066565	infant_taxa_56__Acetatifactor.sp900066565	Infant Fecal Microbiome (Taxa)	5-6 months	stool_microbiome_infant	0.00201789	0.00201789	0.212934	-0.0448292	0.470697	0.105052	Higher in SVN
infant_taxa_56	Acetatifactor.sp900554205	infant_taxa_56__Acetatifactor.sp900554205	Infant Fecal Microbiome (Taxa)	5-6 months	stool_microbiome_infant	0.00201789	0.00201789	0.212934	-0.0448292	0.470697	0.105052	Higher in SVN
infant_taxa_56	Unknown_Acetatifactor	infant_taxa_56__Unknown_Acetatifactor	Infant Fecal Microbiome (Taxa)	5-6 months	stool_microbiome_infant	0.00201789	0.00201789	0.212934	-0.0448292	0.470697	0.105052	Higher in SVN
infant_taxa_56	Unknown_Acetatifactor.1	infant_taxa_56__Unknown_Acetatifactor.1	Infant Fecal Microbiome (Taxa)	5-6 months	stool_microbiome_infant	0.00201789	0.00201789	0.212934	-0.0448292	0.470697	0.105052	Higher in SVN
infant_taxa_56	Unknown_Acetatifactor.2	infant_taxa_56__Unknown_Acetatifactor.2	Infant Fecal Microbiome (Taxa)	5-6 months	stool_microbiome_infant	0.00201789	0.00201789	0.212934	-0.0448292	0.470697	0.105052	Higher in SVN
infant_taxa_56	Unknown_Acetatifactor.3	infant_taxa_56__Unknown_Acetatifactor.3	Infant Fecal Microbiome (Taxa)	5-6 months	stool_microbiome_infant	0.00201789	0.00201789	0.212934	-0.0448292	0.470697	0.105052	Higher in SVN
infant_taxa_56	Unknown_Acetatifactor.4	infant_taxa_56__Unknown_Acetatifactor.4	Infant Fecal Microbiome (Taxa)	5-6 months	stool_microbiome_infant	0.00201789	0.00201789	0.212934	-0.0448292	0.470697	0.105052	Higher in SVN
infant_taxa_56	Unknown_Acetatifactor.5	infant_taxa_56__Unknown_Acetatifactor.5	Infant Fecal Microbiome (Taxa)	5-6 months	stool_microbiome_infant	0.00201789	0.00201789	0.212934	-0.0448292	0.470697	0.105052	Higher in SVN
infant_taxa_56	Unknown_Acetatifactor.6	infant_taxa_56__Unknown_Acetatifactor.6	Infant Fecal Microbiome (Taxa)	5-6 months	stool_microbiome_infant	0.00201789	0.00201789	0.212934	-0.0448292	0.470697	0.105052	Higher in SVN
infant_taxa_56	Unknown_Acetatifactor.7	infant_taxa_56__Unknown_Acetatifactor.7	Infant Fecal Microbiome (Taxa)	5-6 months	stool_microbiome_infant	0.00201789	0.00201789	0.212934	-0.0448292	0.470697	0.105052	Higher in SVN
infant_taxa_56	Unknown_Acetatifactor.8	infant_taxa_56__Unknown_Acetatifactor.8	Infant Fecal Microbiome (Taxa)	5-6 months	stool_microbiome_infant	0.00201789	0.00201789	0.212934	-0.0448292	0.470697	0.105052	Higher in SVN
infant_taxa_56	Unknown_Acetatifactor.9	infant_taxa_56__Unknown_Acetatifactor.9	Infant Fecal Microbiome (Taxa)	5-6 months	stool_microbiome_infant	0.00201789	0.00201789	0.212934	-0.0448292	0.470697	0.105052	Higher in SVN
infant_taxa_56	Unknown_Acetatifactor.10	infant_taxa_56__Unknown_Acetatifactor.10	Infant Fecal Microbiome (Taxa)	5-6 months	stool_microbiome_infant	0.00201789	0.00201789	0.212934	-0.0448292	0.470697	0.105052	Higher in SVN
infant_taxa_56	Agathobacter.faecis	infant_taxa_56__Agathobacter.faecis	Infant Fecal Microbiome (Taxa)	5-6 months	stool_microbiome_infant	0.00201789	0.00201789	0.212934	-0.0448292	0.470697	0.105052	Higher in SVN
infant_taxa_56	Agathobacter.rectalis	infant_taxa_56__Agathobacter.rectalis	Infant Fecal Microbiome (Taxa)	5-6 months	stool_microbiome_infant	0.00201789	0.00201789	0.212934	-0.0448292	0.470697	0.105052	Higher in SVN
infant_taxa_56	Agathobacter.sp000434275	infant_taxa_56__Agathobacter.sp000434275	Infant Fecal Microbiome (Taxa)	5-6 months	stool_microbiome_infant	0.00201789	0.00201789	0.212934	-0.0448292	0.470697	0.105052	Higher in SVN
infant_taxa_56	Agathobacter.sp900317585	infant_taxa_56__Agathobacter.sp900317585	Infant Fecal Microbiome (Taxa)	5-6 months	stool_microbiome_infant	0.00201789	0.00201789	0.212934	-0.0448292	0.470697	0.105052	Higher in SVN
infant_taxa_56	Agathobacter.sp900543445	infant_taxa_56__Agathobacter.sp900543445	Infant Fecal Microbiome (Taxa)	5-6 months	stool_microbiome_infant	0.00201789	0.00201789	0.212934	-0.0448292	0.470697	0.105052	Higher in SVN
infant_taxa_56	Agathobacter.sp900546625	infant_taxa_56__Agathobacter.sp900546625	Infant Fecal Microbiome (Taxa)	5-6 months	stool_microbiome_infant	0.00201789	0.00201789	0.212934	-0.0448292	0.470697	0.105052	Higher in SVN
infant_taxa_56	Agathobacter.sp900547695	infant_taxa_56__Agathobacter.sp900547695	Infant Fecal Microbiome (Taxa)	5-6 months	stool_microbiome_infant	0.00201789	0.00201789	0.212934	-0.0448292	0.470697	0.105052	Higher in SVN
infant_taxa_56	Agathobacter.sp900548765	infant_taxa_56__Agathobacter.sp900548765	Infant Fecal Microbiome (Taxa)	5-6 months	stool_microbiome_infant	0.00201789	0.00201789	0.212934	-0.0448292	0.470697	0.105052	Higher in SVN
infant_taxa_56	Agathobacter.sp900549895	infant_taxa_56__Agathobacter.sp900549895	Infant Fecal Microbiome (Taxa)	5-6 months	stool_microbiome_infant	0.00201789	0.00201789	0.212934	-0.0448292	0.470697	0.105052	Higher in SVN
infant_taxa_56	Agathobacter.sp900550545	infant_taxa_56__Agathobacter.sp900550545	Infant Fecal Microbiome (Taxa)	5-6 months	stool_microbiome_infant	0.00201789	0.00201789	0.212934	-0.0448292	0.470697	0.105052	Higher in SVN
infant_taxa_56	Agathobacter.sp900552085	infant_taxa_56__Agathobacter.sp900552085	Infant Fecal Microbiome (Taxa)	5-6 months	stool_microbiome_infant	0.00201789	0.00201789	0.212934	-0.0448292	0.470697	0.105052	Higher in SVN
infant_taxa_56	Unknown_Agathobacter	infant_taxa_56__Unknown_Agathobacter	Infant Fecal Microbiome (Taxa)	5-6 months	stool_microbiome_infant	0.00201789	0.00201789	0.212934	-0.0448292	0.470697	0.105052	Higher in SVN
infant_taxa_56	Unknown_Agathobacter.1	infant_taxa_56__Unknown_Agathobacter.1	Infant Fecal Microbiome (Taxa)	5-6 months	stool_microbiome_infant	0.00201789	0.00201789	0.212934	-0.0448292	0.470697	0.105052	Higher in SVN
infant_taxa_56	Unknown_Agathobacter.2	infant_taxa_56__Unknown_Agathobacter.2	Infant Fecal Microbiome (Taxa)	5-6 months	stool_microbiome_infant	0.00201789	0.00201789	0.212934	-0.0448292	0.470697	0.105052	Higher in SVN
infant_taxa_56	Unknown_Agathobacter.3	infant_taxa_56__Unknown_Agathobacter.3	Infant Fecal Microbiome (Taxa)	5-6 months	stool_microbiome_infant	0.00201789	0.00201789	0.212934	-0.0448292	0.470697	0.105052	Higher in SVN
infant_taxa_56	Unknown_Agathobacter.4	infant_taxa_56__Unknown_Agathobacter.4	Infant Fecal Microbiome (Taxa)	5-6 months	stool_microbiome_infant	0.00201789	0.00201789	0.212934	-0.0448292	0.470697	0.105052	Higher in SVN
infant_taxa_56	Anaerobutyricum.hallii	infant_taxa_56__Anaerobutyricum.hallii	Infant Fecal Microbiome (Taxa)	5-6 months	stool_microbiome_infant	0.00201789	0.00201789	0.212934	-0.0448292	0.470697	0.105052	Higher in SVN
infant_taxa_56	Anaerobutyricum.hallii_A	infant_taxa_56__Anaerobutyricum.hallii_A	Infant Fecal Microbiome (Taxa)	5-6 months	stool_microbiome_infant	0.00201789	0.00201789	-0.0753005	-0.334115	0.183514	0.56731	Lower in SVN
infant_taxa_56	Unknown_Anaerobutyricum	infant_taxa_56__Unknown_Anaerobutyricum	Infant Fecal Microbiome (Taxa)	5-6 months	stool_microbiome_infant	0.00201789	0.00201789	0.212934	-0.0448292	0.470697	0.105052	Higher in SVN
infant_taxa_56	Anaerostipes.sp900066705	infant_taxa_56__Anaerostipes.sp900066705	Infant Fecal Microbiome (Taxa)	5-6 months	stool_microbiome_infant	0.00201789	0.00201789	0.212934	-0.0448292	0.470697	0.105052	Higher in SVN
infant_taxa_56	Bacteroides_F.pectinophilus	infant_taxa_56__Bacteroides_F.pectinophilus	Infant Fecal Microbiome (Taxa)	5-6 months	stool_microbiome_infant	0.00201789	0.00201789	0.212934	-0.0448292	0.470697	0.105052	Higher in SVN
infant_taxa_56	Bariatricus.comes	infant_taxa_56__Bariatricus.comes	Infant Fecal Microbiome (Taxa)	5-6 months	stool_microbiome_infant	0.00201789	0.00201789	0.212934	-0.0448292	0.470697	0.105052	Higher in SVN
infant_taxa_56	Unknown_Bariatricus	infant_taxa_56__Unknown_Bariatricus	Infant Fecal Microbiome (Taxa)	5-6 months	stool_microbiome_infant	0.00201789	0.00201789	0.212934	-0.0448292	0.470697	0.105052	Higher in SVN
infant_taxa_56	Unknown_Bariatricus.1	infant_taxa_56__Unknown_Bariatricus.1	Infant Fecal Microbiome (Taxa)	5-6 months	stool_microbiome_infant	0.00201789	0.00201789	0.212934	-0.0448292	0.470697	0.105052	Higher in SVN
infant_taxa_56	Unknown_Bariatricus.2	infant_taxa_56__Unknown_Bariatricus.2	Infant Fecal Microbiome (Taxa)	5-6 months	stool_microbiome_infant	0.00201789	0.00201789	0.212934	-0.0448292	0.470697	0.105052	Higher in SVN
infant_taxa_56	Blautia.sp000436935	infant_taxa_56__Blautia.sp000436935	Infant Fecal Microbiome (Taxa)	5-6 months	stool_microbiome_infant	0.00201789	0.00201789	0.212934	-0.0448292	0.470697	0.105052	Higher in SVN
infant_taxa_56	Blautia_A.massiliensis	infant_taxa_56__Blautia_A.massiliensis	Infant Fecal Microbiome (Taxa)	5-6 months	stool_microbiome_infant	0.00201789	0.00201789	-0.0747717	-0.333588	0.184045	0.570036	Lower in SVN
infant_taxa_56	Blautia_A.obeum	infant_taxa_56__Blautia_A.obeum	Infant Fecal Microbiome (Taxa)	5-6 months	stool_microbiome_infant	0.00201789	0.00201789	0.212934	-0.0448292	0.470697	0.105052	Higher in SVN
infant_taxa_56	Blautia_A.sp000436615	infant_taxa_56__Blautia_A.sp000436615	Infant Fecal Microbiome (Taxa)	5-6 months	stool_microbiome_infant	0.00201789	0.00201789	0.212934	-0.0448292	0.470697	0.105052	Higher in SVN
infant_taxa_56	Blautia_A.sp003471165	infant_taxa_56__Blautia_A.sp003471165	Infant Fecal Microbiome (Taxa)	5-6 months	stool_microbiome_infant	0.00201789	0.00201789	0.212934	-0.0448292	0.470697	0.105052	Higher in SVN
infant_taxa_56	Blautia_A.sp003474435	infant_taxa_56__Blautia_A.sp003474435	Infant Fecal Microbiome (Taxa)	5-6 months	stool_microbiome_infant	0.00201789	0.00201789	0.212934	-0.0448292	0.470697	0.105052	Higher in SVN
infant_taxa_56	Blautia_A.sp003477525	infant_taxa_56__Blautia_A.sp003477525	Infant Fecal Microbiome (Taxa)	5-6 months	stool_microbiome_infant	0.00201789	0.00201789	0.212934	-0.0448292	0.470697	0.105052	Higher in SVN
infant_taxa_56	Blautia_A.sp900066145	infant_taxa_56__Blautia_A.sp900066145	Infant Fecal Microbiome (Taxa)	5-6 months	stool_microbiome_infant	0.00201789	0.00201789	0.212934	-0.0448292	0.470697	0.105052	Higher in SVN
infant_taxa_56	Blautia_A.sp900066165	infant_taxa_56__Blautia_A.sp900066165	Infant Fecal Microbiome (Taxa)	5-6 months	stool_microbiome_infant	0.00201789	0.00201789	0.212934	-0.0448292	0.470697	0.105052	Higher in SVN
infant_taxa_56	Blautia_A.sp900066205	infant_taxa_56__Blautia_A.sp900066205	Infant Fecal Microbiome (Taxa)	5-6 months	stool_microbiome_infant	0.00201789	0.00201789	0.212934	-0.0448292	0.470697	0.105052	Higher in SVN
infant_taxa_56	Blautia_A.sp900066335	infant_taxa_56__Blautia_A.sp900066335	Infant Fecal Microbiome (Taxa)	5-6 months	stool_microbiome_infant	0.00201789	0.00201789	0.212934	-0.0448292	0.470697	0.105052	Higher in SVN
infant_taxa_56	Blautia_A.sp900066505	infant_taxa_56__Blautia_A.sp900066505	Infant Fecal Microbiome (Taxa)	5-6 months	stool_microbiome_infant	0.00201789	0.00201789	0.212934	-0.0448292	0.470697	0.105052	Higher in SVN
infant_taxa_56	Blautia_A.sp900120195	infant_taxa_56__Blautia_A.sp900120195	Infant Fecal Microbiome (Taxa)	5-6 months	stool_microbiome_infant	0.00201789	0.00201789	0.212934	-0.0448292	0.470697	0.105052	Higher in SVN
infant_taxa_56	Blautia_A.sp900548245	infant_taxa_56__Blautia_A.sp900548245	Infant Fecal Microbiome (Taxa)	5-6 months	stool_microbiome_infant	0.00201789	0.00201789	0.212934	-0.0448292	0.470697	0.105052	Higher in SVN
infant_taxa_56	Blautia_A.sp900551715	infant_taxa_56__Blautia_A.sp900551715	Infant Fecal Microbiome (Taxa)	5-6 months	stool_microbiome_infant	0.00201789	0.00201789	0.212934	-0.0448292	0.470697	0.105052	Higher in SVN
infant_taxa_56	Unknown_Blautia_A	infant_taxa_56__Unknown_Blautia_A	Infant Fecal Microbiome (Taxa)	5-6 months	stool_microbiome_infant	0.00201789	0.00201789	0.212934	-0.0448292	0.470697	0.105052	Higher in SVN
infant_taxa_56	Unknown_Blautia_A.1	infant_taxa_56__Unknown_Blautia_A.1	Infant Fecal Microbiome (Taxa)	5-6 months	stool_microbiome_infant	0.00201789	0.00201789	0.212934	-0.0448292	0.470697	0.105052	Higher in SVN
infant_taxa_56	Unknown_Blautia_A.2	infant_taxa_56__Unknown_Blautia_A.2	Infant Fecal Microbiome (Taxa)	5-6 months	stool_microbiome_infant	0.00201789	0.00201789	0.212934	-0.0448292	0.470697	0.105052	Higher in SVN
infant_taxa_56	Unknown_Blautia_A.3	infant_taxa_56__Unknown_Blautia_A.3	Infant Fecal Microbiome (Taxa)	5-6 months	stool_microbiome_infant	0.00201789	0.00201789	0.212934	-0.0448292	0.470697	0.105052	Higher in SVN
infant_taxa_56	Unknown_Blautia_A.4	infant_taxa_56__Unknown_Blautia_A.4	Infant Fecal Microbiome (Taxa)	5-6 months	stool_microbiome_infant	0.00201789	0.00201789	0.212934	-0.0448292	0.470697	0.105052	Higher in SVN
infant_taxa_56	Unknown_Blautia_A.5	infant_taxa_56__Unknown_Blautia_A.5	Infant Fecal Microbiome (Taxa)	5-6 months	stool_microbiome_infant	0.00201789	0.00201789	0.212934	-0.0448292	0.470697	0.105052	Higher in SVN
infant_taxa_56	Unknown_Blautia_A.6	infant_taxa_56__Unknown_Blautia_A.6	Infant Fecal Microbiome (Taxa)	5-6 months	stool_microbiome_infant	0.00201789	0.00201789	0.212934	-0.0448292	0.470697	0.105052	Higher in SVN
infant_taxa_56	Unknown_Blautia_A.7	infant_taxa_56__Unknown_Blautia_A.7	Infant Fecal Microbiome (Taxa)	5-6 months	stool_microbiome_infant	0.00201789	0.00201789	0.212934	-0.0448292	0.470697	0.105052	Higher in SVN
infant_taxa_56	Unknown_Blautia_A.8	infant_taxa_56__Unknown_Blautia_A.8	Infant Fecal Microbiome (Taxa)	5-6 months	stool_microbiome_infant	0.00201789	0.00201789	-0.0743935	-0.333212	0.184425	0.57199	Lower in SVN
infant_taxa_56	Unknown_Blautia_A.9	infant_taxa_56__Unknown_Blautia_A.9	Infant Fecal Microbiome (Taxa)	5-6 months	stool_microbiome_infant	0.00201789	0.00201789	0.212934	-0.0448292	0.470697	0.105052	Higher in SVN
infant_taxa_56	Unknown_Blautia_A.10	infant_taxa_56__Unknown_Blautia_A.10	Infant Fecal Microbiome (Taxa)	5-6 months	stool_microbiome_infant	0.00201789	0.00201789	0.212934	-0.0448292	0.470697	0.105052	Higher in SVN
infant_taxa_56	Unknown_Blautia_A.11	infant_taxa_56__Unknown_Blautia_A.11	Infant Fecal Microbiome (Taxa)	5-6 months	stool_microbiome_infant	0.00201789	0.00201789	0.212934	-0.0448292	0.470697	0.105052	Higher in SVN
infant_taxa_56	Unknown_Blautia_A.12	infant_taxa_56__Unknown_Blautia_A.12	Infant Fecal Microbiome (Taxa)	5-6 months	stool_microbiome_infant	0.00201789	0.00201789	0.212934	-0.0448292	0.470697	0.105052	Higher in SVN
infant_taxa_56	Unknown_Blautia_A.13	infant_taxa_56__Unknown_Blautia_A.13	Infant Fecal Microbiome (Taxa)	5-6 months	stool_microbiome_infant	0.00201789	0.00201789	0.212934	-0.0448292	0.470697	0.105052	Higher in SVN
infant_taxa_56	Unknown_Blautia_A.14	infant_taxa_56__Unknown_Blautia_A.14	Infant Fecal Microbiome (Taxa)	5-6 months	stool_microbiome_infant	0.00201789	0.00201789	0.212934	-0.0448292	0.470697	0.105052	Higher in SVN
infant_taxa_56	Unknown_Blautia_A.15	infant_taxa_56__Unknown_Blautia_A.15	Infant Fecal Microbiome (Taxa)	5-6 months	stool_microbiome_infant	0.00201789	0.00201789	0.212934	-0.0448292	0.470697	0.105052	Higher in SVN
infant_taxa_56	Unknown_Blautia_A.16	infant_taxa_56__Unknown_Blautia_A.16	Infant Fecal Microbiome (Taxa)	5-6 months	stool_microbiome_infant	0.00201789	0.00201789	0.212934	-0.0448292	0.470697	0.105052	Higher in SVN
infant_taxa_56	Unknown_Blautia_A.17	infant_taxa_56__Unknown_Blautia_A.17	Infant Fecal Microbiome (Taxa)	5-6 months	stool_microbiome_infant	0.00201789	0.00201789	0.212934	-0.0448292	0.470697	0.105052	Higher in SVN
infant_taxa_56	Unknown_Blautia_A.18	infant_taxa_56__Unknown_Blautia_A.18	Infant Fecal Microbiome (Taxa)	5-6 months	stool_microbiome_infant	0.00201789	0.00201789	0.212934	-0.0448292	0.470697	0.105052	Higher in SVN
infant_taxa_56	Unknown_Blautia_A.19	infant_taxa_56__Unknown_Blautia_A.19	Infant Fecal Microbiome (Taxa)	5-6 months	stool_microbiome_infant	0.00201789	0.00201789	0.212934	-0.0448292	0.470697	0.105052	Higher in SVN
infant_taxa_56	Butyrivibrio_A.crossotus	infant_taxa_56__Butyrivibrio_A.crossotus	Infant Fecal Microbiome (Taxa)	5-6 months	stool_microbiome_infant	0.00201789	0.00201789	0.212934	-0.0448292	0.470697	0.105052	Higher in SVN
infant_taxa_56	Butyrivibrio_A.sp000431815	infant_taxa_56__Butyrivibrio_A.sp000431815	Infant Fecal Microbiome (Taxa)	5-6 months	stool_microbiome_infant	0.00201789	0.00201789	0.212934	-0.0448292	0.470697	0.105052	Higher in SVN
infant_taxa_56	CAG.127.sp900319515	infant_taxa_56__CAG.127.sp900319515	Infant Fecal Microbiome (Taxa)	5-6 months	stool_microbiome_infant	0.00201789	0.00201789	0.212934	-0.0448292	0.470697	0.105052	Higher in SVN
infant_taxa_56	CAG.127.sp900539705	infant_taxa_56__CAG.127.sp900539705	Infant Fecal Microbiome (Taxa)	5-6 months	stool_microbiome_infant	0.00201789	0.00201789	0.212934	-0.0448292	0.470697	0.105052	Higher in SVN
infant_taxa_56	CAG.127.sp900553925	infant_taxa_56__CAG.127.sp900553925	Infant Fecal Microbiome (Taxa)	5-6 months	stool_microbiome_infant	0.00201789	0.00201789	0.212934	-0.0448292	0.470697	0.105052	Higher in SVN
infant_taxa_56	Unknown_CAG.127	infant_taxa_56__Unknown_CAG.127	Infant Fecal Microbiome (Taxa)	5-6 months	stool_microbiome_infant	0.00201789	0.00201789	0.212934	-0.0448292	0.470697	0.105052	Higher in SVN
infant_taxa_56	Unknown_CAG.127.1	infant_taxa_56__Unknown_CAG.127.1	Infant Fecal Microbiome (Taxa)	5-6 months	stool_microbiome_infant	0.00201789	0.00201789	0.212934	-0.0448292	0.470697	0.105052	Higher in SVN
infant_taxa_56	Unknown_CAG.127.2	infant_taxa_56__Unknown_CAG.127.2	Infant Fecal Microbiome (Taxa)	5-6 months	stool_microbiome_infant	0.00201789	0.00201789	0.212934	-0.0448292	0.470697	0.105052	Higher in SVN
infant_taxa_56	CAG.194.sp000432915	infant_taxa_56__CAG.194.sp000432915	Infant Fecal Microbiome (Taxa)	5-6 months	stool_microbiome_infant	0.00201789	0.00201789	0.212934	-0.0448292	0.470697	0.105052	Higher in SVN
infant_taxa_56	CAG.303.sp000437755	infant_taxa_56__CAG.303.sp000437755	Infant Fecal Microbiome (Taxa)	5-6 months	stool_microbiome_infant	0.00201789	0.00201789	0.212934	-0.0448292	0.470697	0.105052	Higher in SVN
infant_taxa_56	CAG.303.sp900539455	infant_taxa_56__CAG.303.sp900539455	Infant Fecal Microbiome (Taxa)	5-6 months	stool_microbiome_infant	0.00201789	0.00201789	0.212934	-0.0448292	0.470697	0.105052	Higher in SVN
infant_taxa_56	CAG.45.sp000438375	infant_taxa_56__CAG.45.sp000438375	Infant Fecal Microbiome (Taxa)	5-6 months	stool_microbiome_infant	0.00201789	0.00201789	0.212934	-0.0448292	0.470697	0.105052	Higher in SVN
infant_taxa_56	CAG.45.sp900066395	infant_taxa_56__CAG.45.sp900066395	Infant Fecal Microbiome (Taxa)	5-6 months	stool_microbiome_infant	0.00201789	0.00201789	0.212934	-0.0448292	0.470697	0.105052	Higher in SVN
infant_taxa_56	Unknown_CAG.45	infant_taxa_56__Unknown_CAG.45	Infant Fecal Microbiome (Taxa)	5-6 months	stool_microbiome_infant	0.00201789	0.00201789	0.212934	-0.0448292	0.470697	0.105052	Higher in SVN
infant_taxa_56	CAG.510.sp000434615	infant_taxa_56__CAG.510.sp000434615	Infant Fecal Microbiome (Taxa)	5-6 months	stool_microbiome_infant	0.00201789	0.00201789	0.212934	-0.0448292	0.470697	0.105052	Higher in SVN
infant_taxa_56	CAG.510.sp900550475	infant_taxa_56__CAG.510.sp900550475	Infant Fecal Microbiome (Taxa)	5-6 months	stool_microbiome_infant	0.00201789	0.00201789	0.212934	-0.0448292	0.470697	0.105052	Higher in SVN
infant_taxa_56	CAG.590.sp000431135	infant_taxa_56__CAG.590.sp000431135	Infant Fecal Microbiome (Taxa)	5-6 months	stool_microbiome_infant	0.00201789	0.00201789	0.212934	-0.0448292	0.470697	0.105052	Higher in SVN
infant_taxa_56	CAG.590.sp900552885	infant_taxa_56__CAG.590.sp900552885	Infant Fecal Microbiome (Taxa)	5-6 months	stool_microbiome_infant	0.00201789	0.00201789	0.212934	-0.0448292	0.470697	0.105052	Higher in SVN
infant_taxa_56	Unknown_CAG.590	infant_taxa_56__Unknown_CAG.590	Infant Fecal Microbiome (Taxa)	5-6 months	stool_microbiome_infant	0.00201789	0.00201789	0.212934	-0.0448292	0.470697	0.105052	Higher in SVN
infant_taxa_56	Unknown_CAG.590.1	infant_taxa_56__Unknown_CAG.590.1	Infant Fecal Microbiome (Taxa)	5-6 months	stool_microbiome_infant	0.00201789	0.00201789	0.212934	-0.0448292	0.470697	0.105052	Higher in SVN
infant_taxa_56	Unknown_CAG.590.2	infant_taxa_56__Unknown_CAG.590.2	Infant Fecal Microbiome (Taxa)	5-6 months	stool_microbiome_infant	0.00201789	0.00201789	0.212934	-0.0448292	0.470697	0.105052	Higher in SVN
infant_taxa_56	CAG.603.sp900066105	infant_taxa_56__CAG.603.sp900066105	Infant Fecal Microbiome (Taxa)	5-6 months	stool_microbiome_infant	0.00201789	0.00201789	0.212934	-0.0448292	0.470697	0.105052	Higher in SVN
infant_taxa_56	CAG.632.sp000431515	infant_taxa_56__CAG.632.sp000431515	Infant Fecal Microbiome (Taxa)	5-6 months	stool_microbiome_infant	0.00201789	0.00201789	0.212934	-0.0448292	0.470697	0.105052	Higher in SVN
infant_taxa_56	CAG.632.sp002406015	infant_taxa_56__CAG.632.sp002406015	Infant Fecal Microbiome (Taxa)	5-6 months	stool_microbiome_infant	0.00201789	0.00201789	0.212934	-0.0448292	0.470697	0.105052	Higher in SVN
infant_taxa_56	CAG.632.sp900539185	infant_taxa_56__CAG.632.sp900539185	Infant Fecal Microbiome (Taxa)	5-6 months	stool_microbiome_infant	0.00201789	0.00201789	0.212934	-0.0448292	0.470697	0.105052	Higher in SVN
infant_taxa_56	Unknown_CAG.632	infant_taxa_56__Unknown_CAG.632	Infant Fecal Microbiome (Taxa)	5-6 months	stool_microbiome_infant	0.00201789	0.00201789	0.212934	-0.0448292	0.470697	0.105052	Higher in SVN
infant_taxa_56	CAG.791.sp000431495	infant_taxa_56__CAG.791.sp000431495	Infant Fecal Microbiome (Taxa)	5-6 months	stool_microbiome_infant	0.00201789	0.00201789	0.212934	-0.0448292	0.470697	0.105052	Higher in SVN
infant_taxa_56	CAG.81.sp900066055	infant_taxa_56__CAG.81.sp900066055	Infant Fecal Microbiome (Taxa)	5-6 months	stool_microbiome_infant	0.00201789	0.00201789	0.212934	-0.0448292	0.470697	0.105052	Higher in SVN
infant_taxa_56	CAG.81.sp900066785	infant_taxa_56__CAG.81.sp900066785	Infant Fecal Microbiome (Taxa)	5-6 months	stool_microbiome_infant	0.00201789	0.00201789	0.212934	-0.0448292	0.470697	0.105052	Higher in SVN
infant_taxa_56	CAG.81.sp900556965	infant_taxa_56__CAG.81.sp900556965	Infant Fecal Microbiome (Taxa)	5-6 months	stool_microbiome_infant	0.00201789	0.00201789	0.212934	-0.0448292	0.470697	0.105052	Higher in SVN
infant_taxa_56	Unknown_CAG.81	infant_taxa_56__Unknown_CAG.81	Infant Fecal Microbiome (Taxa)	5-6 months	stool_microbiome_infant	0.00201789	0.00201789	0.212934	-0.0448292	0.470697	0.105052	Higher in SVN
infant_taxa_56	Unknown_CAG.81.1	infant_taxa_56__Unknown_CAG.81.1	Infant Fecal Microbiome (Taxa)	5-6 months	stool_microbiome_infant	0.00201789	0.00201789	0.212934	-0.0448292	0.470697	0.105052	Higher in SVN
infant_taxa_56	CAG.882.sp000435595	infant_taxa_56__CAG.882.sp000435595	Infant Fecal Microbiome (Taxa)	5-6 months	stool_microbiome_infant	0.00201789	0.00201789	0.212934	-0.0448292	0.470697	0.105052	Higher in SVN
infant_taxa_56	CAG.882.sp003486385	infant_taxa_56__CAG.882.sp003486385	Infant Fecal Microbiome (Taxa)	5-6 months	stool_microbiome_infant	0.00201789	0.00201789	0.212934	-0.0448292	0.470697	0.105052	Higher in SVN
infant_taxa_56	CAG.882.sp900545175	infant_taxa_56__CAG.882.sp900545175	Infant Fecal Microbiome (Taxa)	5-6 months	stool_microbiome_infant	0.00201789	0.00201789	0.212934	-0.0448292	0.470697	0.105052	Higher in SVN
infant_taxa_56	Unknown_CAG.882	infant_taxa_56__Unknown_CAG.882	Infant Fecal Microbiome (Taxa)	5-6 months	stool_microbiome_infant	0.00201789	0.00201789	0.212934	-0.0448292	0.470697	0.105052	Higher in SVN
infant_taxa_56	Unknown_CAG.882.1	infant_taxa_56__Unknown_CAG.882.1	Infant Fecal Microbiome (Taxa)	5-6 months	stool_microbiome_infant	0.00201789	0.00201789	0.212934	-0.0448292	0.470697	0.105052	Higher in SVN
infant_taxa_56	CAG.95.sp000436115	infant_taxa_56__CAG.95.sp000436115	Infant Fecal Microbiome (Taxa)	5-6 months	stool_microbiome_infant	0.00201789	0.00201789	0.212934	-0.0448292	0.470697	0.105052	Higher in SVN
infant_taxa_56	CAG.95.sp000438155	infant_taxa_56__CAG.95.sp000438155	Infant Fecal Microbiome (Taxa)	5-6 months	stool_microbiome_infant	0.00201789	0.00201789	0.212934	-0.0448292	0.470697	0.105052	Higher in SVN
infant_taxa_56	CAG.95.sp900553305	infant_taxa_56__CAG.95.sp900553305	Infant Fecal Microbiome (Taxa)	5-6 months	stool_microbiome_infant	0.00201789	0.00201789	0.212934	-0.0448292	0.470697	0.105052	Higher in SVN
infant_taxa_56	Unknown_CAG.95	infant_taxa_56__Unknown_CAG.95	Infant Fecal Microbiome (Taxa)	5-6 months	stool_microbiome_infant	0.00201789	0.00201789	0.212934	-0.0448292	0.470697	0.105052	Higher in SVN
infant_taxa_56	Unknown_CAG.95.1	infant_taxa_56__Unknown_CAG.95.1	Infant Fecal Microbiome (Taxa)	5-6 months	stool_microbiome_infant	0.00201789	0.00201789	0.212934	-0.0448292	0.470697	0.105052	Higher in SVN
infant_taxa_56	Unknown_CAG.95.2	infant_taxa_56__Unknown_CAG.95.2	Infant Fecal Microbiome (Taxa)	5-6 months	stool_microbiome_infant	0.00201789	0.00201789	0.212934	-0.0448292	0.470697	0.105052	Higher in SVN
infant_taxa_56	COE1.sp001916965	infant_taxa_56__COE1.sp001916965	Infant Fecal Microbiome (Taxa)	5-6 months	stool_microbiome_infant	0.00201789	0.00201789	0.212934	-0.0448292	0.470697	0.105052	Higher in SVN
infant_taxa_56	Unknown_COE1	infant_taxa_56__Unknown_COE1	Infant Fecal Microbiome (Taxa)	5-6 months	stool_microbiome_infant	0.00201789	0.00201789	0.212934	-0.0448292	0.470697	0.105052	Higher in SVN
infant_taxa_56	Unknown_Clostridium_AI	infant_taxa_56__Unknown_Clostridium_AI	Infant Fecal Microbiome (Taxa)	5-6 months	stool_microbiome_infant	0.00201789	0.00201789	0.212934	-0.0448292	0.470697	0.105052	Higher in SVN
infant_taxa_56	Clostridium_Q.sp003024715	infant_taxa_56__Clostridium_Q.sp003024715	Infant Fecal Microbiome (Taxa)	5-6 months	stool_microbiome_infant	0.00201789	0.00201789	0.212934	-0.0448292	0.470697	0.105052	Higher in SVN
infant_taxa_56	Clostridium_Q.symbiosum	infant_taxa_56__Clostridium_Q.symbiosum	Infant Fecal Microbiome (Taxa)	5-6 months	stool_microbiome_infant	0.00201789	0.00201789	-0.0755384	-0.334352	0.183275	0.566086	Lower in SVN
infant_taxa_56	Coprococcus.eutactus	infant_taxa_56__Coprococcus.eutactus	Infant Fecal Microbiome (Taxa)	5-6 months	stool_microbiome_infant	0.00201789	0.00201789	0.212934	-0.0448292	0.470697	0.105052	Higher in SVN
infant_taxa_56	Coprococcus.eutactus_A	infant_taxa_56__Coprococcus.eutactus_A	Infant Fecal Microbiome (Taxa)	5-6 months	stool_microbiome_infant	0.00201789	0.00201789	0.212934	-0.0448292	0.470697	0.105052	Higher in SVN
infant_taxa_56	Coprococcus.sp000154245	infant_taxa_56__Coprococcus.sp000154245	Infant Fecal Microbiome (Taxa)	5-6 months	stool_microbiome_infant	0.00201789	0.00201789	0.212934	-0.0448292	0.470697	0.105052	Higher in SVN
infant_taxa_56	Coprococcus.sp000433075	infant_taxa_56__Coprococcus.sp000433075	Infant Fecal Microbiome (Taxa)	5-6 months	stool_microbiome_infant	0.00201789	0.00201789	0.212934	-0.0448292	0.470697	0.105052	Higher in SVN
infant_taxa_56	Coprococcus.sp900066115	infant_taxa_56__Coprococcus.sp900066115	Infant Fecal Microbiome (Taxa)	5-6 months	stool_microbiome_infant	0.00201789	0.00201789	0.212934	-0.0448292	0.470697	0.105052	Higher in SVN
infant_taxa_56	Coprococcus.sp900548215	infant_taxa_56__Coprococcus.sp900548215	Infant Fecal Microbiome (Taxa)	5-6 months	stool_microbiome_infant	0.00201789	0.00201789	0.212934	-0.0448292	0.470697	0.105052	Higher in SVN
infant_taxa_56	Coprococcus.sp900548315	infant_taxa_56__Coprococcus.sp900548315	Infant Fecal Microbiome (Taxa)	5-6 months	stool_microbiome_infant	0.00201789	0.00201789	0.212934	-0.0448292	0.470697	0.105052	Higher in SVN
infant_taxa_56	Coprococcus.sp900557435	infant_taxa_56__Coprococcus.sp900557435	Infant Fecal Microbiome (Taxa)	5-6 months	stool_microbiome_infant	0.00201789	0.00201789	0.212934	-0.0448292	0.470697	0.105052	Higher in SVN
infant_taxa_56	Unknown_Coprococcus	infant_taxa_56__Unknown_Coprococcus	Infant Fecal Microbiome (Taxa)	5-6 months	stool_microbiome_infant	0.00201789	0.00201789	0.212934	-0.0448292	0.470697	0.105052	Higher in SVN
infant_taxa_56	Unknown_Coprococcus.1	infant_taxa_56__Unknown_Coprococcus.1	Infant Fecal Microbiome (Taxa)	5-6 months	stool_microbiome_infant	0.00201789	0.00201789	0.212934	-0.0448292	0.470697	0.105052	Higher in SVN
infant_taxa_56	Unknown_Coprococcus.2	infant_taxa_56__Unknown_Coprococcus.2	Infant Fecal Microbiome (Taxa)	5-6 months	stool_microbiome_infant	0.00201789	0.00201789	0.212934	-0.0448292	0.470697	0.105052	Higher in SVN
infant_taxa_56	Coprococcus_A.catus	infant_taxa_56__Coprococcus_A.catus	Infant Fecal Microbiome (Taxa)	5-6 months	stool_microbiome_infant	0.00201789	0.00201789	0.212934	-0.0448292	0.470697	0.105052	Higher in SVN
infant_taxa_56	Coprococcus_A.sp900548825	infant_taxa_56__Coprococcus_A.sp900548825	Infant Fecal Microbiome (Taxa)	5-6 months	stool_microbiome_infant	0.00201789	0.00201789	0.212934	-0.0448292	0.470697	0.105052	Higher in SVN
infant_taxa_56	Dorea.faecis	infant_taxa_56__Dorea.faecis	Infant Fecal Microbiome (Taxa)	5-6 months	stool_microbiome_infant	0.00201789	0.00201789	-0.0743444	-0.333163	0.184474	0.572244	Lower in SVN
infant_taxa_56	Dorea.longicatena	infant_taxa_56__Dorea.longicatena	Infant Fecal Microbiome (Taxa)	5-6 months	stool_microbiome_infant	0.00201789	0.00201789	0.212934	-0.0448292	0.470697	0.105052	Higher in SVN
infant_taxa_56	Dorea.longicatena_B	infant_taxa_56__Dorea.longicatena_B	Infant Fecal Microbiome (Taxa)	5-6 months	stool_microbiome_infant	0.00201789	0.00201789	0.212934	-0.0448292	0.470697	0.105052	Higher in SVN
infant_taxa_56	Dorea.phocaeensis	infant_taxa_56__Dorea.phocaeensis	Infant Fecal Microbiome (Taxa)	5-6 months	stool_microbiome_infant	0.00201789	0.00201789	-0.0754542	-0.334268	0.18336	0.566519	Lower in SVN
infant_taxa_56	Dorea.scindens	infant_taxa_56__Dorea.scindens	Infant Fecal Microbiome (Taxa)	5-6 months	stool_microbiome_infant	0.00201789	0.00201789	0.212934	-0.0448292	0.470697	0.105052	Higher in SVN
infant_taxa_56	Dorea.sp000433215	infant_taxa_56__Dorea.sp000433215	Infant Fecal Microbiome (Taxa)	5-6 months	stool_microbiome_infant	0.00201789	0.00201789	-0.0744506	-0.333269	0.184367	0.571695	Lower in SVN
infant_taxa_56	Dorea.sp900066555	infant_taxa_56__Dorea.sp900066555	Infant Fecal Microbiome (Taxa)	5-6 months	stool_microbiome_infant	0.00201789	0.00201789	0.212934	-0.0448292	0.470697	0.105052	Higher in SVN
infant_taxa_56	Dorea.sp900543315	infant_taxa_56__Dorea.sp900543315	Infant Fecal Microbiome (Taxa)	5-6 months	stool_microbiome_infant	0.00201789	0.00201789	-0.0739143	-0.332734	0.184906	0.57447	Lower in SVN
infant_taxa_56	Dorea.sp900550865	infant_taxa_56__Dorea.sp900550865	Infant Fecal Microbiome (Taxa)	5-6 months	stool_microbiome_infant	0.00201789	0.00201789	0.212934	-0.0448292	0.470697	0.105052	Higher in SVN
infant_taxa_56	Unknown_Dorea	infant_taxa_56__Unknown_Dorea	Infant Fecal Microbiome (Taxa)	5-6 months	stool_microbiome_infant	0.00201789	0.00201789	0.212934	-0.0448292	0.470697	0.105052	Higher in SVN
infant_taxa_56	Unknown_Dorea.1	infant_taxa_56__Unknown_Dorea.1	Infant Fecal Microbiome (Taxa)	5-6 months	stool_microbiome_infant	0.00201789	0.00201789	0.212934	-0.0448292	0.470697	0.105052	Higher in SVN
infant_taxa_56	Unknown_Dorea.2	infant_taxa_56__Unknown_Dorea.2	Infant Fecal Microbiome (Taxa)	5-6 months	stool_microbiome_infant	0.00201789	0.00201789	0.212934	-0.0448292	0.470697	0.105052	Higher in SVN
infant_taxa_56	Eisenbergiella.massiliensis	infant_taxa_56__Eisenbergiella.massiliensis	Infant Fecal Microbiome (Taxa)	5-6 months	stool_microbiome_infant	0.00201789	0.00201789	0.212934	-0.0448292	0.470697	0.105052	Higher in SVN
infant_taxa_56	Eisenbergiella.sp900066775	infant_taxa_56__Eisenbergiella.sp900066775	Infant Fecal Microbiome (Taxa)	5-6 months	stool_microbiome_infant	0.00201789	0.00201789	0.212934	-0.0448292	0.470697	0.105052	Higher in SVN
infant_taxa_56	Enterocloster.bolteae	infant_taxa_56__Enterocloster.bolteae	Infant Fecal Microbiome (Taxa)	5-6 months	stool_microbiome_infant	0.00201789	0.00201789	-0.0761333	-0.334945	0.182678	0.56303	Lower in SVN
infant_taxa_56	Enterocloster.sp000431375	infant_taxa_56__Enterocloster.sp000431375	Infant Fecal Microbiome (Taxa)	5-6 months	stool_microbiome_infant	0.00201789	0.00201789	0.212934	-0.0448292	0.470697	0.105052	Higher in SVN
infant_taxa_56	Enterocloster.sp900540675	infant_taxa_56__Enterocloster.sp900540675	Infant Fecal Microbiome (Taxa)	5-6 months	stool_microbiome_infant	0.00201789	0.00201789	0.212934	-0.0448292	0.470697	0.105052	Higher in SVN
infant_taxa_56	Enterocloster.sp900547035	infant_taxa_56__Enterocloster.sp900547035	Infant Fecal Microbiome (Taxa)	5-6 months	stool_microbiome_infant	0.00201789	0.00201789	0.212934	-0.0448292	0.470697	0.105052	Higher in SVN
infant_taxa_56	Eubacterium_F.sp000433735	infant_taxa_56__Eubacterium_F.sp000433735	Infant Fecal Microbiome (Taxa)	5-6 months	stool_microbiome_infant	0.00201789	0.00201789	0.212934	-0.0448292	0.470697	0.105052	Higher in SVN
infant_taxa_56	Eubacterium_F.sp003491505	infant_taxa_56__Eubacterium_F.sp003491505	Infant Fecal Microbiome (Taxa)	5-6 months	stool_microbiome_infant	0.00201789	0.00201789	0.212934	-0.0448292	0.470697	0.105052	Higher in SVN
infant_taxa_56	Eubacterium_F.sp900539115	infant_taxa_56__Eubacterium_F.sp900539115	Infant Fecal Microbiome (Taxa)	5-6 months	stool_microbiome_infant	0.00201789	0.00201789	0.212934	-0.0448292	0.470697	0.105052	Higher in SVN
infant_taxa_56	Unknown_Eubacterium_F	infant_taxa_56__Unknown_Eubacterium_F	Infant Fecal Microbiome (Taxa)	5-6 months	stool_microbiome_infant	0.00201789	0.00201789	0.212934	-0.0448292	0.470697	0.105052	Higher in SVN
infant_taxa_56	Unknown_Eubacterium_F.1	infant_taxa_56__Unknown_Eubacterium_F.1	Infant Fecal Microbiome (Taxa)	5-6 months	stool_microbiome_infant	0.00201789	0.00201789	0.212934	-0.0448292	0.470697	0.105052	Higher in SVN
infant_taxa_56	Unknown_Eubacterium_F.2	infant_taxa_56__Unknown_Eubacterium_F.2	Infant Fecal Microbiome (Taxa)	5-6 months	stool_microbiome_infant	0.00201789	0.00201789	0.212934	-0.0448292	0.470697	0.105052	Higher in SVN
infant_taxa_56	Unknown_Eubacterium_F.3	infant_taxa_56__Unknown_Eubacterium_F.3	Infant Fecal Microbiome (Taxa)	5-6 months	stool_microbiome_infant	0.00201789	0.00201789	0.212934	-0.0448292	0.470697	0.105052	Higher in SVN
infant_taxa_56	Unknown_Eubacterium_F.4	infant_taxa_56__Unknown_Eubacterium_F.4	Infant Fecal Microbiome (Taxa)	5-6 months	stool_microbiome_infant	0.00201789	0.00201789	0.212934	-0.0448292	0.470697	0.105052	Higher in SVN
infant_taxa_56	Eubacterium_G.sp000432355	infant_taxa_56__Eubacterium_G.sp000432355	Infant Fecal Microbiome (Taxa)	5-6 months	stool_microbiome_infant	0.00201789	0.00201789	0.212934	-0.0448292	0.470697	0.105052	Higher in SVN
infant_taxa_56	Eubacterium_G.sp000434315	infant_taxa_56__Eubacterium_G.sp000434315	Infant Fecal Microbiome (Taxa)	5-6 months	stool_microbiome_infant	0.00201789	0.00201789	0.212934	-0.0448292	0.470697	0.105052	Higher in SVN
infant_taxa_56	Eubacterium_G.sp000435815	infant_taxa_56__Eubacterium_G.sp000435815	Infant Fecal Microbiome (Taxa)	5-6 months	stool_microbiome_infant	0.00201789	0.00201789	0.212934	-0.0448292	0.470697	0.105052	Higher in SVN
infant_taxa_56	Eubacterium_G.sp900548465	infant_taxa_56__Eubacterium_G.sp900548465	Infant Fecal Microbiome (Taxa)	5-6 months	stool_microbiome_infant	0.00201789	0.00201789	0.212934	-0.0448292	0.470697	0.105052	Higher in SVN
infant_taxa_56	Eubacterium_G.sp900550135	infant_taxa_56__Eubacterium_G.sp900550135	Infant Fecal Microbiome (Taxa)	5-6 months	stool_microbiome_infant	0.00201789	0.00201789	0.212934	-0.0448292	0.470697	0.105052	Higher in SVN
infant_taxa_56	Eubacterium_G.ventriosum	infant_taxa_56__Eubacterium_G.ventriosum	Infant Fecal Microbiome (Taxa)	5-6 months	stool_microbiome_infant	0.00201789	0.00201789	0.212934	-0.0448292	0.470697	0.105052	Higher in SVN
infant_taxa_56	Eubacterium_I.ramulus	infant_taxa_56__Eubacterium_I.ramulus	Infant Fecal Microbiome (Taxa)	5-6 months	stool_microbiome_infant	0.00201789	0.00201789	-0.0749087	-0.333725	0.183907	0.569329	Lower in SVN
infant_taxa_56	Eubacterium_I.ramulus_A	infant_taxa_56__Eubacterium_I.ramulus_A	Infant Fecal Microbiome (Taxa)	5-6 months	stool_microbiome_infant	0.00201789	0.00201789	0.212934	-0.0448292	0.470697	0.105052	Higher in SVN
infant_taxa_56	Eubacterium_I.sp900546495	infant_taxa_56__Eubacterium_I.sp900546495	Infant Fecal Microbiome (Taxa)	5-6 months	stool_microbiome_infant	0.00201789	0.00201789	0.212934	-0.0448292	0.470697	0.105052	Higher in SVN
infant_taxa_56	Eubacterium_I.sp900557275	infant_taxa_56__Eubacterium_I.sp900557275	Infant Fecal Microbiome (Taxa)	5-6 months	stool_microbiome_infant	0.00201789	0.00201789	0.212934	-0.0448292	0.470697	0.105052	Higher in SVN
infant_taxa_56	Unknown_Eubacterium_J	infant_taxa_56__Unknown_Eubacterium_J	Infant Fecal Microbiome (Taxa)	5-6 months	stool_microbiome_infant	0.00201789	0.00201789	0.212934	-0.0448292	0.470697	0.105052	Higher in SVN
infant_taxa_56	Unknown_Eubacterium_J.1	infant_taxa_56__Unknown_Eubacterium_J.1	Infant Fecal Microbiome (Taxa)	5-6 months	stool_microbiome_infant	0.00201789	0.00201789	0.212934	-0.0448292	0.470697	0.105052	Higher in SVN
infant_taxa_56	Faecalimonas.nexilis	infant_taxa_56__Faecalimonas.nexilis	Infant Fecal Microbiome (Taxa)	5-6 months	stool_microbiome_infant	0.00201789	0.00201789	0.0800226	-0.178773	0.338818	0.543246	Higher in SVN
infant_taxa_56	Fusicatenibacter.saccharivorans	infant_taxa_56__Fusicatenibacter.saccharivorans	Infant Fecal Microbiome (Taxa)	5-6 months	stool_microbiome_infant	0.00201789	0.00201789	0.212934	-0.0448292	0.470697	0.105052	Higher in SVN
infant_taxa_56	Unknown_Fusicatenibacter	infant_taxa_56__Unknown_Fusicatenibacter	Infant Fecal Microbiome (Taxa)	5-6 months	stool_microbiome_infant	0.00201789	0.00201789	0.212934	-0.0448292	0.470697	0.105052	Higher in SVN
infant_taxa_56	GCA.900066575.sp900066385	infant_taxa_56__GCA.900066575.sp900066385	Infant Fecal Microbiome (Taxa)	5-6 months	stool_microbiome_infant	0.00201789	0.00201789	-0.0765324	-0.335342	0.182277	0.560984	Lower in SVN
infant_taxa_56	GCA.900066575.sp900553635	infant_taxa_56__GCA.900066575.sp900553635	Infant Fecal Microbiome (Taxa)	5-6 months	stool_microbiome_infant	0.00201789	0.00201789	0.212934	-0.0448292	0.470697	0.105052	Higher in SVN
infant_taxa_56	Unknown_GCA.900066575	infant_taxa_56__Unknown_GCA.900066575	Infant Fecal Microbiome (Taxa)	5-6 months	stool_microbiome_infant	0.00201789	0.00201789	0.212934	-0.0448292	0.470697	0.105052	Higher in SVN
infant_taxa_56	Unknown_GCA.900066575.1	infant_taxa_56__Unknown_GCA.900066575.1	Infant Fecal Microbiome (Taxa)	5-6 months	stool_microbiome_infant	0.00201789	0.00201789	0.212934	-0.0448292	0.470697	0.105052	Higher in SVN
infant_taxa_56	Hungatella.effluvii	infant_taxa_56__Hungatella.effluvii	Infant Fecal Microbiome (Taxa)	5-6 months	stool_microbiome_infant	0.00201789	0.00201789	0.212934	-0.0448292	0.470697	0.105052	Higher in SVN
infant_taxa_56	Hungatella.sp005845265	infant_taxa_56__Hungatella.sp005845265	Infant Fecal Microbiome (Taxa)	5-6 months	stool_microbiome_infant	0.00201789	0.00201789	0.212934	-0.0448292	0.470697	0.105052	Higher in SVN
infant_taxa_56	Hungatella_A.sp003478355	infant_taxa_56__Hungatella_A.sp003478355	Infant Fecal Microbiome (Taxa)	5-6 months	stool_microbiome_infant	0.00201789	0.00201789	0.212934	-0.0448292	0.470697	0.105052	Higher in SVN
infant_taxa_56	Unknown_Hungatella_A	infant_taxa_56__Unknown_Hungatella_A	Infant Fecal Microbiome (Taxa)	5-6 months	stool_microbiome_infant	0.00201789	0.00201789	0.212934	-0.0448292	0.470697	0.105052	Higher in SVN
infant_taxa_56	Unknown_Hungatella_A.1	infant_taxa_56__Unknown_Hungatella_A.1	Infant Fecal Microbiome (Taxa)	5-6 months	stool_microbiome_infant	0.00201789	0.00201789	0.212934	-0.0448292	0.470697	0.105052	Higher in SVN
infant_taxa_56	KLE1615.sp900066985	infant_taxa_56__KLE1615.sp900066985	Infant Fecal Microbiome (Taxa)	5-6 months	stool_microbiome_infant	0.00201789	0.00201789	0.212934	-0.0448292	0.470697	0.105052	Higher in SVN
infant_taxa_56	Unknown_KLE1615	infant_taxa_56__Unknown_KLE1615	Infant Fecal Microbiome (Taxa)	5-6 months	stool_microbiome_infant	0.00201789	0.00201789	0.212934	-0.0448292	0.470697	0.105052	Higher in SVN
infant_taxa_56	Lachnospira.eligens_B	infant_taxa_56__Lachnospira.eligens_B	Infant Fecal Microbiome (Taxa)	5-6 months	stool_microbiome_infant	0.00201789	0.00201789	0.212934	-0.0448292	0.470697	0.105052	Higher in SVN
infant_taxa_56	Lachnospira.rogosae	infant_taxa_56__Lachnospira.rogosae	Infant Fecal Microbiome (Taxa)	5-6 months	stool_microbiome_infant	0.00201789	0.00201789	0.212934	-0.0448292	0.470697	0.105052	Higher in SVN
infant_taxa_56	Lachnospira.sp000436475	infant_taxa_56__Lachnospira.sp000436475	Infant Fecal Microbiome (Taxa)	5-6 months	stool_microbiome_infant	0.00201789	0.00201789	0.212934	-0.0448292	0.470697	0.105052	Higher in SVN
infant_taxa_56	Lachnospira.sp000436535	infant_taxa_56__Lachnospira.sp000436535	Infant Fecal Microbiome (Taxa)	5-6 months	stool_microbiome_infant	0.00201789	0.00201789	0.212934	-0.0448292	0.470697	0.105052	Higher in SVN
infant_taxa_56	Lachnospira.sp000437735	infant_taxa_56__Lachnospira.sp000437735	Infant Fecal Microbiome (Taxa)	5-6 months	stool_microbiome_infant	0.00201789	0.00201789	0.212934	-0.0448292	0.470697	0.105052	Higher in SVN
infant_taxa_56	Lachnospira.sp003451515	infant_taxa_56__Lachnospira.sp003451515	Infant Fecal Microbiome (Taxa)	5-6 months	stool_microbiome_infant	0.00201789	0.00201789	0.212934	-0.0448292	0.470697	0.105052	Higher in SVN
infant_taxa_56	Lachnospira.sp003537285	infant_taxa_56__Lachnospira.sp003537285	Infant Fecal Microbiome (Taxa)	5-6 months	stool_microbiome_infant	0.00201789	0.00201789	0.212934	-0.0448292	0.470697	0.105052	Higher in SVN
infant_taxa_56	Lachnospira.sp900316325	infant_taxa_56__Lachnospira.sp900316325	Infant Fecal Microbiome (Taxa)	5-6 months	stool_microbiome_infant	0.00201789	0.00201789	0.212934	-0.0448292	0.470697	0.105052	Higher in SVN
infant_taxa_56	Lachnospira.sp900545725	infant_taxa_56__Lachnospira.sp900545725	Infant Fecal Microbiome (Taxa)	5-6 months	stool_microbiome_infant	0.00201789	0.00201789	0.212934	-0.0448292	0.470697	0.105052	Higher in SVN
infant_taxa_56	Lachnospira.sp900547255	infant_taxa_56__Lachnospira.sp900547255	Infant Fecal Microbiome (Taxa)	5-6 months	stool_microbiome_infant	0.00201789	0.00201789	0.212934	-0.0448292	0.470697	0.105052	Higher in SVN
infant_taxa_56	Lachnospira.sp900551945	infant_taxa_56__Lachnospira.sp900551945	Infant Fecal Microbiome (Taxa)	5-6 months	stool_microbiome_infant	0.00201789	0.00201789	0.212934	-0.0448292	0.470697	0.105052	Higher in SVN
infant_taxa_56	Unknown_Lachnospira	infant_taxa_56__Unknown_Lachnospira	Infant Fecal Microbiome (Taxa)	5-6 months	stool_microbiome_infant	0.00201789	0.00201789	0.212934	-0.0448292	0.470697	0.105052	Higher in SVN
infant_taxa_56	Unknown_Lachnospira.1	infant_taxa_56__Unknown_Lachnospira.1	Infant Fecal Microbiome (Taxa)	5-6 months	stool_microbiome_infant	0.00201789	0.00201789	0.212934	-0.0448292	0.470697	0.105052	Higher in SVN
infant_taxa_56	Unknown_Lachnospira.2	infant_taxa_56__Unknown_Lachnospira.2	Infant Fecal Microbiome (Taxa)	5-6 months	stool_microbiome_infant	0.00201789	0.00201789	0.212934	-0.0448292	0.470697	0.105052	Higher in SVN
infant_taxa_56	Unknown_Lachnospira.3	infant_taxa_56__Unknown_Lachnospira.3	Infant Fecal Microbiome (Taxa)	5-6 months	stool_microbiome_infant	0.00201789	0.00201789	0.212934	-0.0448292	0.470697	0.105052	Higher in SVN
infant_taxa_56	Marvinbryantia.sp900066075	infant_taxa_56__Marvinbryantia.sp900066075	Infant Fecal Microbiome (Taxa)	5-6 months	stool_microbiome_infant	0.00201789	0.00201789	0.212934	-0.0448292	0.470697	0.105052	Higher in SVN
infant_taxa_56	Marvinbryantia.sp900544685	infant_taxa_56__Marvinbryantia.sp900544685	Infant Fecal Microbiome (Taxa)	5-6 months	stool_microbiome_infant	0.00201789	0.00201789	0.212934	-0.0448292	0.470697	0.105052	Higher in SVN
infant_taxa_56	Unknown_Marvinbryantia	infant_taxa_56__Unknown_Marvinbryantia	Infant Fecal Microbiome (Taxa)	5-6 months	stool_microbiome_infant	0.00201789	0.00201789	0.212934	-0.0448292	0.470697	0.105052	Higher in SVN
infant_taxa_56	Unknown_Marvinbryantia.1	infant_taxa_56__Unknown_Marvinbryantia.1	Infant Fecal Microbiome (Taxa)	5-6 months	stool_microbiome_infant	0.00201789	0.00201789	0.212934	-0.0448292	0.470697	0.105052	Higher in SVN
infant_taxa_56	Mediterraneibacter.faecis	infant_taxa_56__Mediterraneibacter.faecis	Infant Fecal Microbiome (Taxa)	5-6 months	stool_microbiome_infant	0.00201789	0.00201789	-0.0749293	-0.333745	0.183887	0.569223	Lower in SVN
infant_taxa_56	Mediterraneibacter.lactaris	infant_taxa_56__Mediterraneibacter.lactaris	Infant Fecal Microbiome (Taxa)	5-6 months	stool_microbiome_infant	0.00201789	0.00201789	-0.112474	-0.371103	0.146156	0.392714	Lower in SVN
infant_taxa_56	Mediterraneibacter.sp900555215	infant_taxa_56__Mediterraneibacter.sp900555215	Infant Fecal Microbiome (Taxa)	5-6 months	stool_microbiome_infant	0.00201789	0.00201789	-0.0778552	-0.336659	0.180949	0.554228	Lower in SVN
infant_taxa_56	Unknown_Mediterraneibacter	infant_taxa_56__Unknown_Mediterraneibacter	Infant Fecal Microbiome (Taxa)	5-6 months	stool_microbiome_infant	0.00201789	0.00201789	0.212934	-0.0448292	0.470697	0.105052	Higher in SVN
infant_taxa_56	Unknown_Mediterraneibacter.1	infant_taxa_56__Unknown_Mediterraneibacter.1	Infant Fecal Microbiome (Taxa)	5-6 months	stool_microbiome_infant	0.00201789	0.00201789	0.212934	-0.0448292	0.470697	0.105052	Higher in SVN
infant_taxa_56	Unknown_Mediterraneibacter.2	infant_taxa_56__Unknown_Mediterraneibacter.2	Infant Fecal Microbiome (Taxa)	5-6 months	stool_microbiome_infant	0.00201789	0.00201789	0.212934	-0.0448292	0.470697	0.105052	Higher in SVN
infant_taxa_56	Unknown_Mediterraneibacter.3	infant_taxa_56__Unknown_Mediterraneibacter.3	Infant Fecal Microbiome (Taxa)	5-6 months	stool_microbiome_infant	0.00201789	0.00201789	0.212934	-0.0448292	0.470697	0.105052	Higher in SVN
infant_taxa_56	Mediterraneibacter_A.butyricigenes	infant_taxa_56__Mediterraneibacter_A.butyricigenes	Infant Fecal Microbiome (Taxa)	5-6 months	stool_microbiome_infant	0.00201789	0.00201789	0.212934	-0.0448292	0.470697	0.105052	Higher in SVN
infant_taxa_56	Unknown_Mediterraneibacter_A	infant_taxa_56__Unknown_Mediterraneibacter_A	Infant Fecal Microbiome (Taxa)	5-6 months	stool_microbiome_infant	0.00201789	0.00201789	0.212934	-0.0448292	0.470697	0.105052	Higher in SVN
infant_taxa_56	Unknown_NC2004	infant_taxa_56__Unknown_NC2004	Infant Fecal Microbiome (Taxa)	5-6 months	stool_microbiome_infant	0.00201789	0.00201789	0.212934	-0.0448292	0.470697	0.105052	Higher in SVN
infant_taxa_56	Oribacterium.sp004554245	infant_taxa_56__Oribacterium.sp004554245	Infant Fecal Microbiome (Taxa)	5-6 months	stool_microbiome_infant	0.00201789	0.00201789	0.212934	-0.0448292	0.470697	0.105052	Higher in SVN
infant_taxa_56	Unknown_Oribacterium	infant_taxa_56__Unknown_Oribacterium	Infant Fecal Microbiome (Taxa)	5-6 months	stool_microbiome_infant	0.00201789	0.00201789	0.212934	-0.0448292	0.470697	0.105052	Higher in SVN
infant_taxa_56	Unknown_Oribacterium.1	infant_taxa_56__Unknown_Oribacterium.1	Infant Fecal Microbiome (Taxa)	5-6 months	stool_microbiome_infant	0.00201789	0.00201789	0.212934	-0.0448292	0.470697	0.105052	Higher in SVN
infant_taxa_56	Unknown_Oribacterium.2	infant_taxa_56__Unknown_Oribacterium.2	Infant Fecal Microbiome (Taxa)	5-6 months	stool_microbiome_infant	0.00201789	0.00201789	0.212934	-0.0448292	0.470697	0.105052	Higher in SVN
infant_taxa_56	Unknown_Oribacterium.3	infant_taxa_56__Unknown_Oribacterium.3	Infant Fecal Microbiome (Taxa)	5-6 months	stool_microbiome_infant	0.00201789	0.00201789	0.212934	-0.0448292	0.470697	0.105052	Higher in SVN
infant_taxa_56	Unknown_Oribacterium.4	infant_taxa_56__Unknown_Oribacterium.4	Infant Fecal Microbiome (Taxa)	5-6 months	stool_microbiome_infant	0.00201789	0.00201789	0.212934	-0.0448292	0.470697	0.105052	Higher in SVN
infant_taxa_56	Roseburia.hominis	infant_taxa_56__Roseburia.hominis	Infant Fecal Microbiome (Taxa)	5-6 months	stool_microbiome_infant	0.00201789	0.00201789	0.212934	-0.0448292	0.470697	0.105052	Higher in SVN
infant_taxa_56	Roseburia.intestinalis	infant_taxa_56__Roseburia.intestinalis	Infant Fecal Microbiome (Taxa)	5-6 months	stool_microbiome_infant	0.00201789	0.00201789	0.212934	-0.0448292	0.470697	0.105052	Higher in SVN
infant_taxa_56	Roseburia.sp001940165	infant_taxa_56__Roseburia.sp001940165	Infant Fecal Microbiome (Taxa)	5-6 months	stool_microbiome_infant	0.00201789	0.00201789	0.212934	-0.0448292	0.470697	0.105052	Higher in SVN
infant_taxa_56	Roseburia.sp003470905	infant_taxa_56__Roseburia.sp003470905	Infant Fecal Microbiome (Taxa)	5-6 months	stool_microbiome_infant	0.00201789	0.00201789	0.212934	-0.0448292	0.470697	0.105052	Higher in SVN
infant_taxa_56	Roseburia.sp003483745	infant_taxa_56__Roseburia.sp003483745	Infant Fecal Microbiome (Taxa)	5-6 months	stool_microbiome_infant	0.00201789	0.00201789	0.212934	-0.0448292	0.470697	0.105052	Higher in SVN
infant_taxa_56	Roseburia.sp900542495	infant_taxa_56__Roseburia.sp900542495	Infant Fecal Microbiome (Taxa)	5-6 months	stool_microbiome_infant	0.00201789	0.00201789	0.212934	-0.0448292	0.470697	0.105052	Higher in SVN
infant_taxa_56	Roseburia.sp900548205	infant_taxa_56__Roseburia.sp900548205	Infant Fecal Microbiome (Taxa)	5-6 months	stool_microbiome_infant	0.00201789	0.00201789	0.212934	-0.0448292	0.470697	0.105052	Higher in SVN
infant_taxa_56	Roseburia.sp900550935	infant_taxa_56__Roseburia.sp900550935	Infant Fecal Microbiome (Taxa)	5-6 months	stool_microbiome_infant	0.00201789	0.00201789	0.212934	-0.0448292	0.470697	0.105052	Higher in SVN
infant_taxa_56	Roseburia.sp900552665	infant_taxa_56__Roseburia.sp900552665	Infant Fecal Microbiome (Taxa)	5-6 months	stool_microbiome_infant	0.00201789	0.00201789	0.212934	-0.0448292	0.470697	0.105052	Higher in SVN
infant_taxa_56	Unknown_Roseburia	infant_taxa_56__Unknown_Roseburia	Infant Fecal Microbiome (Taxa)	5-6 months	stool_microbiome_infant	0.00201789	0.00201789	0.212934	-0.0448292	0.470697	0.105052	Higher in SVN
infant_taxa_56	Unknown_Roseburia.1	infant_taxa_56__Unknown_Roseburia.1	Infant Fecal Microbiome (Taxa)	5-6 months	stool_microbiome_infant	0.00201789	0.00201789	0.212934	-0.0448292	0.470697	0.105052	Higher in SVN
infant_taxa_56	Unknown_Roseburia.2	infant_taxa_56__Unknown_Roseburia.2	Infant Fecal Microbiome (Taxa)	5-6 months	stool_microbiome_infant	0.00201789	0.00201789	0.212934	-0.0448292	0.470697	0.105052	Higher in SVN
infant_taxa_56	Unknown_Roseburia.3	infant_taxa_56__Unknown_Roseburia.3	Infant Fecal Microbiome (Taxa)	5-6 months	stool_microbiome_infant	0.00201789	0.00201789	0.212934	-0.0448292	0.470697	0.105052	Higher in SVN
infant_taxa_56	Unknown_Roseburia.4	infant_taxa_56__Unknown_Roseburia.4	Infant Fecal Microbiome (Taxa)	5-6 months	stool_microbiome_infant	0.00201789	0.00201789	0.212934	-0.0448292	0.470697	0.105052	Higher in SVN
infant_taxa_56	Unknown_Roseburia.5	infant_taxa_56__Unknown_Roseburia.5	Infant Fecal Microbiome (Taxa)	5-6 months	stool_microbiome_infant	0.00201789	0.00201789	0.212934	-0.0448292	0.470697	0.105052	Higher in SVN
infant_taxa_56	Unknown_Roseburia.6	infant_taxa_56__Unknown_Roseburia.6	Infant Fecal Microbiome (Taxa)	5-6 months	stool_microbiome_infant	0.00201789	0.00201789	0.212934	-0.0448292	0.470697	0.105052	Higher in SVN
infant_taxa_56	Unknown_Roseburia.7	infant_taxa_56__Unknown_Roseburia.7	Infant Fecal Microbiome (Taxa)	5-6 months	stool_microbiome_infant	0.00201789	0.00201789	0.212934	-0.0448292	0.470697	0.105052	Higher in SVN
infant_taxa_56	Ruminococcus_A.sp000437095	infant_taxa_56__Ruminococcus_A.sp000437095	Infant Fecal Microbiome (Taxa)	5-6 months	stool_microbiome_infant	0.00201789	0.00201789	0.212934	-0.0448292	0.470697	0.105052	Higher in SVN
infant_taxa_56	Ruminococcus_A.sp003011855	infant_taxa_56__Ruminococcus_A.sp003011855	Infant Fecal Microbiome (Taxa)	5-6 months	stool_microbiome_infant	0.00201789	0.00201789	0.212934	-0.0448292	0.470697	0.105052	Higher in SVN
infant_taxa_56	Unknown_Ruminococcus_A	infant_taxa_56__Unknown_Ruminococcus_A	Infant Fecal Microbiome (Taxa)	5-6 months	stool_microbiome_infant	0.00201789	0.00201789	0.212934	-0.0448292	0.470697	0.105052	Higher in SVN
infant_taxa_56	Schaedlerella.sp900066545	infant_taxa_56__Schaedlerella.sp900066545	Infant Fecal Microbiome (Taxa)	5-6 months	stool_microbiome_infant	0.00201789	0.00201789	-0.0754299	-0.334244	0.183384	0.566644	Lower in SVN
infant_taxa_56	Sellimonas.intestinalis	infant_taxa_56__Sellimonas.intestinalis	Infant Fecal Microbiome (Taxa)	5-6 months	stool_microbiome_infant	0.00201789	0.00201789	0.212934	-0.0448292	0.470697	0.105052	Higher in SVN
infant_taxa_56	Stomatobaculum.naviforme	infant_taxa_56__Stomatobaculum.naviforme	Infant Fecal Microbiome (Taxa)	5-6 months	stool_microbiome_infant	0.00201789	0.00201789	0.212934	-0.0448292	0.470697	0.105052	Higher in SVN
infant_taxa_56	TF01.11.sp000436755	infant_taxa_56__TF01.11.sp000436755	Infant Fecal Microbiome (Taxa)	5-6 months	stool_microbiome_infant	0.00201789	0.00201789	0.212934	-0.0448292	0.470697	0.105052	Higher in SVN
infant_taxa_56	TF01.11.sp001414325	infant_taxa_56__TF01.11.sp001414325	Infant Fecal Microbiome (Taxa)	5-6 months	stool_microbiome_infant	0.00201789	0.00201789	0.212934	-0.0448292	0.470697	0.105052	Higher in SVN
infant_taxa_56	TF01.11.sp001916135	infant_taxa_56__TF01.11.sp001916135	Infant Fecal Microbiome (Taxa)	5-6 months	stool_microbiome_infant	0.00201789	0.00201789	0.212934	-0.0448292	0.470697	0.105052	Higher in SVN
infant_taxa_56	TF01.11.sp003149875	infant_taxa_56__TF01.11.sp003149875	Infant Fecal Microbiome (Taxa)	5-6 months	stool_microbiome_infant	0.00201789	0.00201789	0.212934	-0.0448292	0.470697	0.105052	Higher in SVN
infant_taxa_56	TF01.11.sp003524945	infant_taxa_56__TF01.11.sp003524945	Infant Fecal Microbiome (Taxa)	5-6 months	stool_microbiome_infant	0.00201789	0.00201789	0.212934	-0.0448292	0.470697	0.105052	Higher in SVN
infant_taxa_56	TF01.11.sp003529475	infant_taxa_56__TF01.11.sp003529475	Infant Fecal Microbiome (Taxa)	5-6 months	stool_microbiome_infant	0.00201789	0.00201789	0.212934	-0.0448292	0.470697	0.105052	Higher in SVN
infant_taxa_56	Unknown_TF01.11	infant_taxa_56__Unknown_TF01.11	Infant Fecal Microbiome (Taxa)	5-6 months	stool_microbiome_infant	0.00201789	0.00201789	0.212934	-0.0448292	0.470697	0.105052	Higher in SVN
infant_taxa_56	Unknown_TF01.11.1	infant_taxa_56__Unknown_TF01.11.1	Infant Fecal Microbiome (Taxa)	5-6 months	stool_microbiome_infant	0.00201789	0.00201789	0.212934	-0.0448292	0.470697	0.105052	Higher in SVN
infant_taxa_56	Unknown_TF01.11.2	infant_taxa_56__Unknown_TF01.11.2	Infant Fecal Microbiome (Taxa)	5-6 months	stool_microbiome_infant	0.00201789	0.00201789	0.212934	-0.0448292	0.470697	0.105052	Higher in SVN
infant_taxa_56	Unknown_TF01.11.3	infant_taxa_56__Unknown_TF01.11.3	Infant Fecal Microbiome (Taxa)	5-6 months	stool_microbiome_infant	0.00201789	0.00201789	0.212934	-0.0448292	0.470697	0.105052	Higher in SVN
infant_taxa_56	Unknown_TF01.11.4	infant_taxa_56__Unknown_TF01.11.4	Infant Fecal Microbiome (Taxa)	5-6 months	stool_microbiome_infant	0.00201789	0.00201789	0.212934	-0.0448292	0.470697	0.105052	Higher in SVN
infant_taxa_56	Unknown_TF01.11.5	infant_taxa_56__Unknown_TF01.11.5	Infant Fecal Microbiome (Taxa)	5-6 months	stool_microbiome_infant	0.00201789	0.00201789	0.212934	-0.0448292	0.470697	0.105052	Higher in SVN
infant_taxa_56	Unknown_TF01.11.6	infant_taxa_56__Unknown_TF01.11.6	Infant Fecal Microbiome (Taxa)	5-6 months	stool_microbiome_infant	0.00201789	0.00201789	0.212934	-0.0448292	0.470697	0.105052	Higher in SVN
infant_taxa_56	UBA11774.sp003507655	infant_taxa_56__UBA11774.sp003507655	Infant Fecal Microbiome (Taxa)	5-6 months	stool_microbiome_infant	0.00201789	0.00201789	0.212934	-0.0448292	0.470697	0.105052	Higher in SVN
infant_taxa_56	Unknown_UBA11957	infant_taxa_56__Unknown_UBA11957	Infant Fecal Microbiome (Taxa)	5-6 months	stool_microbiome_infant	0.00201789	0.00201789	0.212934	-0.0448292	0.470697	0.105052	Higher in SVN
infant_taxa_56	Unknown_UBA2821	infant_taxa_56__Unknown_UBA2821	Infant Fecal Microbiome (Taxa)	5-6 months	stool_microbiome_infant	0.00201789	0.00201789	0.212934	-0.0448292	0.470697	0.105052	Higher in SVN
infant_taxa_56	UBA2882.sp900549665	infant_taxa_56__UBA2882.sp900549665	Infant Fecal Microbiome (Taxa)	5-6 months	stool_microbiome_infant	0.00201789	0.00201789	0.212934	-0.0448292	0.470697	0.105052	Higher in SVN
infant_taxa_56	UBA4285.sp900545225	infant_taxa_56__UBA4285.sp900545225	Infant Fecal Microbiome (Taxa)	5-6 months	stool_microbiome_infant	0.00201789	0.00201789	0.212934	-0.0448292	0.470697	0.105052	Higher in SVN
infant_taxa_56	Unknown_UBA7096	infant_taxa_56__Unknown_UBA7096	Infant Fecal Microbiome (Taxa)	5-6 months	stool_microbiome_infant	0.00201789	0.00201789	0.212934	-0.0448292	0.470697	0.105052	Higher in SVN
infant_taxa_56	Unknown_UBA7160	infant_taxa_56__Unknown_UBA7160	Infant Fecal Microbiome (Taxa)	5-6 months	stool_microbiome_infant	0.00201789	0.00201789	0.212934	-0.0448292	0.470697	0.105052	Higher in SVN
infant_taxa_56	UBA7182.sp003480725	infant_taxa_56__UBA7182.sp003480725	Infant Fecal Microbiome (Taxa)	5-6 months	stool_microbiome_infant	0.00201789	0.00201789	0.212934	-0.0448292	0.470697	0.105052	Higher in SVN
infant_taxa_56	UBA7182.sp003481535	infant_taxa_56__UBA7182.sp003481535	Infant Fecal Microbiome (Taxa)	5-6 months	stool_microbiome_infant	0.00201789	0.00201789	0.212934	-0.0448292	0.470697	0.105052	Higher in SVN
infant_taxa_56	Unknown_UBA7182	infant_taxa_56__Unknown_UBA7182	Infant Fecal Microbiome (Taxa)	5-6 months	stool_microbiome_infant	0.00201789	0.00201789	0.212934	-0.0448292	0.470697	0.105052	Higher in SVN
infant_taxa_56	UBA9502.sp003478505	infant_taxa_56__UBA9502.sp003478505	Infant Fecal Microbiome (Taxa)	5-6 months	stool_microbiome_infant	0.00201789	0.00201789	0.212934	-0.0448292	0.470697	0.105052	Higher in SVN
infant_taxa_56	UBA9502.sp003480315	infant_taxa_56__UBA9502.sp003480315	Infant Fecal Microbiome (Taxa)	5-6 months	stool_microbiome_infant	0.00201789	0.00201789	0.212934	-0.0448292	0.470697	0.105052	Higher in SVN
infant_taxa_56	UBA9502.sp900555625	infant_taxa_56__UBA9502.sp900555625	Infant Fecal Microbiome (Taxa)	5-6 months	stool_microbiome_infant	0.00201789	0.00201789	0.212934	-0.0448292	0.470697	0.105052	Higher in SVN
infant_taxa_56	Unknown_UBA9502	infant_taxa_56__Unknown_UBA9502	Infant Fecal Microbiome (Taxa)	5-6 months	stool_microbiome_infant	0.00201789	0.00201789	0.212934	-0.0448292	0.470697	0.105052	Higher in SVN
infant_taxa_56	Unknown_UBA9502.1	infant_taxa_56__Unknown_UBA9502.1	Infant Fecal Microbiome (Taxa)	5-6 months	stool_microbiome_infant	0.00201789	0.00201789	0.212934	-0.0448292	0.470697	0.105052	Higher in SVN
infant_taxa_56	UMGS1375.sp900066615	infant_taxa_56__UMGS1375.sp900066615	Infant Fecal Microbiome (Taxa)	5-6 months	stool_microbiome_infant	0.00201789	0.00201789	0.212934	-0.0448292	0.470697	0.105052	Higher in SVN
infant_taxa_56	UMGS1375.sp900551235	infant_taxa_56__UMGS1375.sp900551235	Infant Fecal Microbiome (Taxa)	5-6 months	stool_microbiome_infant	0.00201789	0.00201789	0.212934	-0.0448292	0.470697	0.105052	Higher in SVN
infant_taxa_56	Unknown_UMGS1375	infant_taxa_56__Unknown_UMGS1375	Infant Fecal Microbiome (Taxa)	5-6 months	stool_microbiome_infant	0.00201789	0.00201789	0.212934	-0.0448292	0.470697	0.105052	Higher in SVN
infant_taxa_56	Unknown_UMGS2037	infant_taxa_56__Unknown_UMGS2037	Infant Fecal Microbiome (Taxa)	5-6 months	stool_microbiome_infant	0.00201789	0.00201789	0.212934	-0.0448292	0.470697	0.105052	Higher in SVN
infant_taxa_56	Unknown_UMGS2037.1	infant_taxa_56__Unknown_UMGS2037.1	Infant Fecal Microbiome (Taxa)	5-6 months	stool_microbiome_infant	0.00201789	0.00201789	0.212934	-0.0448292	0.470697	0.105052	Higher in SVN
infant_taxa_56	Unknown_Lachnospiraceae	infant_taxa_56__Unknown_Lachnospiraceae	Infant Fecal Microbiome (Taxa)	5-6 months	stool_microbiome_infant	0.00201789	0.00201789	0.212934	-0.0448292	0.470697	0.105052	Higher in SVN
infant_taxa_56	Unknown_Lachnospiraceae.1	infant_taxa_56__Unknown_Lachnospiraceae.1	Infant Fecal Microbiome (Taxa)	5-6 months	stool_microbiome_infant	0.00201789	0.00201789	0.212934	-0.0448292	0.470697	0.105052	Higher in SVN
infant_taxa_56	Unknown_Lachnospiraceae.2	infant_taxa_56__Unknown_Lachnospiraceae.2	Infant Fecal Microbiome (Taxa)	5-6 months	stool_microbiome_infant	0.00201789	0.00201789	0.212934	-0.0448292	0.470697	0.105052	Higher in SVN
infant_taxa_56	Unknown_Lachnospiraceae.3	infant_taxa_56__Unknown_Lachnospiraceae.3	Infant Fecal Microbiome (Taxa)	5-6 months	stool_microbiome_infant	0.00201789	0.00201789	0.212934	-0.0448292	0.470697	0.105052	Higher in SVN
infant_taxa_56	Unknown_Lachnospiraceae.4	infant_taxa_56__Unknown_Lachnospiraceae.4	Infant Fecal Microbiome (Taxa)	5-6 months	stool_microbiome_infant	0.00201789	0.00201789	0.212934	-0.0448292	0.470697	0.105052	Higher in SVN
infant_taxa_56	Unknown_Lachnospiraceae.5	infant_taxa_56__Unknown_Lachnospiraceae.5	Infant Fecal Microbiome (Taxa)	5-6 months	stool_microbiome_infant	0.00201789	0.00201789	0.212934	-0.0448292	0.470697	0.105052	Higher in SVN
infant_taxa_56	Unknown_Lachnospiraceae.6	infant_taxa_56__Unknown_Lachnospiraceae.6	Infant Fecal Microbiome (Taxa)	5-6 months	stool_microbiome_infant	0.00201789	0.00201789	0.212934	-0.0448292	0.470697	0.105052	Higher in SVN
infant_taxa_56	Unknown_Lachnospiraceae.7	infant_taxa_56__Unknown_Lachnospiraceae.7	Infant Fecal Microbiome (Taxa)	5-6 months	stool_microbiome_infant	0.00201789	0.00201789	0.212934	-0.0448292	0.470697	0.105052	Higher in SVN
infant_taxa_56	Unknown_Lachnospiraceae.8	infant_taxa_56__Unknown_Lachnospiraceae.8	Infant Fecal Microbiome (Taxa)	5-6 months	stool_microbiome_infant	0.00201789	0.00201789	0.212934	-0.0448292	0.470697	0.105052	Higher in SVN
infant_taxa_56	Unknown_Lachnospiraceae.9	infant_taxa_56__Unknown_Lachnospiraceae.9	Infant Fecal Microbiome (Taxa)	5-6 months	stool_microbiome_infant	0.00201789	0.00201789	0.212934	-0.0448292	0.470697	0.105052	Higher in SVN
infant_taxa_56	Unknown_Lachnospiraceae.10	infant_taxa_56__Unknown_Lachnospiraceae.10	Infant Fecal Microbiome (Taxa)	5-6 months	stool_microbiome_infant	0.00201789	0.00201789	0.212934	-0.0448292	0.470697	0.105052	Higher in SVN
infant_taxa_56	Unknown_Lachnospiraceae.11	infant_taxa_56__Unknown_Lachnospiraceae.11	Infant Fecal Microbiome (Taxa)	5-6 months	stool_microbiome_infant	0.00201789	0.00201789	0.212934	-0.0448292	0.470697	0.105052	Higher in SVN
infant_taxa_56	Unknown_Lachnospiraceae.12	infant_taxa_56__Unknown_Lachnospiraceae.12	Infant Fecal Microbiome (Taxa)	5-6 months	stool_microbiome_infant	0.00201789	0.00201789	0.212934	-0.0448292	0.470697	0.105052	Higher in SVN
infant_taxa_56	Unknown_Lachnospiraceae.13	infant_taxa_56__Unknown_Lachnospiraceae.13	Infant Fecal Microbiome (Taxa)	5-6 months	stool_microbiome_infant	0.00201789	0.00201789	0.212934	-0.0448292	0.470697	0.105052	Higher in SVN
infant_taxa_56	Unknown_Lachnospiraceae.14	infant_taxa_56__Unknown_Lachnospiraceae.14	Infant Fecal Microbiome (Taxa)	5-6 months	stool_microbiome_infant	0.00201789	0.00201789	0.212934	-0.0448292	0.470697	0.105052	Higher in SVN
infant_taxa_56	Unknown_Lachnospiraceae.15	infant_taxa_56__Unknown_Lachnospiraceae.15	Infant Fecal Microbiome (Taxa)	5-6 months	stool_microbiome_infant	0.00201789	0.00201789	0.212934	-0.0448292	0.470697	0.105052	Higher in SVN
infant_taxa_56	Unknown_Lachnospiraceae.16	infant_taxa_56__Unknown_Lachnospiraceae.16	Infant Fecal Microbiome (Taxa)	5-6 months	stool_microbiome_infant	0.00201789	0.00201789	0.212934	-0.0448292	0.470697	0.105052	Higher in SVN
infant_taxa_56	Unknown_Lachnospiraceae.17	infant_taxa_56__Unknown_Lachnospiraceae.17	Infant Fecal Microbiome (Taxa)	5-6 months	stool_microbiome_infant	0.00201789	0.00201789	0.212934	-0.0448292	0.470697	0.105052	Higher in SVN
infant_taxa_56	Unknown_Lachnospiraceae.18	infant_taxa_56__Unknown_Lachnospiraceae.18	Infant Fecal Microbiome (Taxa)	5-6 months	stool_microbiome_infant	0.00201789	0.00201789	0.212934	-0.0448292	0.470697	0.105052	Higher in SVN
infant_taxa_56	Unknown_Lachnospiraceae.19	infant_taxa_56__Unknown_Lachnospiraceae.19	Infant Fecal Microbiome (Taxa)	5-6 months	stool_microbiome_infant	0.00201789	0.00201789	0.212934	-0.0448292	0.470697	0.105052	Higher in SVN
infant_taxa_56	Unknown_Lachnospiraceae.20	infant_taxa_56__Unknown_Lachnospiraceae.20	Infant Fecal Microbiome (Taxa)	5-6 months	stool_microbiome_infant	0.00201789	0.00201789	0.212934	-0.0448292	0.470697	0.105052	Higher in SVN
infant_taxa_56	Unknown_Lachnospiraceae.21	infant_taxa_56__Unknown_Lachnospiraceae.21	Infant Fecal Microbiome (Taxa)	5-6 months	stool_microbiome_infant	0.00201789	0.00201789	0.212934	-0.0448292	0.470697	0.105052	Higher in SVN
infant_taxa_56	Unknown_V9D3004	infant_taxa_56__Unknown_V9D3004	Infant Fecal Microbiome (Taxa)	5-6 months	stool_microbiome_infant	0.00201789	0.00201789	0.212934	-0.0448292	0.470697	0.105052	Higher in SVN
infant_taxa_56	V9D3004.sp002349525	infant_taxa_56__V9D3004.sp002349525	Infant Fecal Microbiome (Taxa)	5-6 months	stool_microbiome_infant	0.00201789	0.00201789	0.212934	-0.0448292	0.470697	0.105052	Higher in SVN
infant_taxa_56	Unknown_UBA1390_1	infant_taxa_56__Unknown_UBA1390_1	Infant Fecal Microbiome (Taxa)	5-6 months	stool_microbiome_infant	0.00201789	0.00201789	0.212934	-0.0448292	0.470697	0.105052	Higher in SVN
infant_taxa_56	Unknown_UBA1390_2	infant_taxa_56__Unknown_UBA1390_2	Infant Fecal Microbiome (Taxa)	5-6 months	stool_microbiome_infant	0.00201789	0.00201789	0.212934	-0.0448292	0.470697	0.105052	Higher in SVN
infant_taxa_56	Unknown_Lachnospirales	infant_taxa_56__Unknown_Lachnospirales	Infant Fecal Microbiome (Taxa)	5-6 months	stool_microbiome_infant	0.00201789	0.00201789	0.212934	-0.0448292	0.470697	0.105052	Higher in SVN
infant_taxa_56	Unknown_UBA1775	infant_taxa_56__Unknown_UBA1775	Infant Fecal Microbiome (Taxa)	5-6 months	stool_microbiome_infant	0.00201789	0.00201789	0.212934	-0.0448292	0.470697	0.105052	Higher in SVN
infant_taxa_56	Unknown_Firm.18	infant_taxa_56__Unknown_Firm.18	Infant Fecal Microbiome (Taxa)	5-6 months	stool_microbiome_infant	0.00201789	0.00201789	0.212934	-0.0448292	0.470697	0.105052	Higher in SVN
infant_taxa_56	Unknown_Firm.18.1	infant_taxa_56__Unknown_Firm.18.1	Infant Fecal Microbiome (Taxa)	5-6 months	stool_microbiome_infant	0.00201789	0.00201789	0.212934	-0.0448292	0.470697	0.105052	Higher in SVN
infant_taxa_56	UMGS1326.sp900550775	infant_taxa_56__UMGS1326.sp900550775	Infant Fecal Microbiome (Taxa)	5-6 months	stool_microbiome_infant	0.00201789	0.00201789	0.212934	-0.0448292	0.470697	0.105052	Higher in SVN
infant_taxa_56	Unknown_UMGS1326	infant_taxa_56__Unknown_UMGS1326	Infant Fecal Microbiome (Taxa)	5-6 months	stool_microbiome_infant	0.00201789	0.00201789	0.212934	-0.0448292	0.470697	0.105052	Higher in SVN
infant_taxa_56	Unknown_UMGS1326.1	infant_taxa_56__Unknown_UMGS1326.1	Infant Fecal Microbiome (Taxa)	5-6 months	stool_microbiome_infant	0.00201789	0.00201789	0.212934	-0.0448292	0.470697	0.105052	Higher in SVN
infant_taxa_56	UMGS1494.sp900552305	infant_taxa_56__UMGS1494.sp900552305	Infant Fecal Microbiome (Taxa)	5-6 months	stool_microbiome_infant	0.00201789	0.00201789	0.212934	-0.0448292	0.470697	0.105052	Higher in SVN
infant_taxa_56	Unknown_UMGS1494	infant_taxa_56__Unknown_UMGS1494	Infant Fecal Microbiome (Taxa)	5-6 months	stool_microbiome_infant	0.00201789	0.00201789	0.212934	-0.0448292	0.470697	0.105052	Higher in SVN
infant_taxa_56	UMGS1820.sp900545865	infant_taxa_56__UMGS1820.sp900545865	Infant Fecal Microbiome (Taxa)	5-6 months	stool_microbiome_infant	0.00201789	0.00201789	0.212934	-0.0448292	0.470697	0.105052	Higher in SVN
infant_taxa_56	UMGS1820.sp900555375	infant_taxa_56__UMGS1820.sp900555375	Infant Fecal Microbiome (Taxa)	5-6 months	stool_microbiome_infant	0.00201789	0.00201789	0.212934	-0.0448292	0.470697	0.105052	Higher in SVN
infant_taxa_56	Unknown_UMGS1820	infant_taxa_56__Unknown_UMGS1820	Infant Fecal Microbiome (Taxa)	5-6 months	stool_microbiome_infant	0.00201789	0.00201789	0.212934	-0.0448292	0.470697	0.105052	Higher in SVN
infant_taxa_56	Unknown_Monoglobaceae	infant_taxa_56__Unknown_Monoglobaceae	Infant Fecal Microbiome (Taxa)	5-6 months	stool_microbiome_infant	0.00201789	0.00201789	0.212934	-0.0448292	0.470697	0.105052	Higher in SVN
infant_taxa_56	CAG.41.sp900066215	infant_taxa_56__CAG.41.sp900066215	Infant Fecal Microbiome (Taxa)	5-6 months	stool_microbiome_infant	0.00201789	0.00201789	0.212934	-0.0448292	0.470697	0.105052	Higher in SVN
infant_taxa_56	UBA4716.sp900556575	infant_taxa_56__UBA4716.sp900556575	Infant Fecal Microbiome (Taxa)	5-6 months	stool_microbiome_infant	0.00201789	0.00201789	0.212934	-0.0448292	0.470697	0.105052	Higher in SVN
infant_taxa_56	Unknown_UBA4716	infant_taxa_56__Unknown_UBA4716	Infant Fecal Microbiome (Taxa)	5-6 months	stool_microbiome_infant	0.00201789	0.00201789	0.212934	-0.0448292	0.470697	0.105052	Higher in SVN
infant_taxa_56	Unknown_UBA4716.1	infant_taxa_56__Unknown_UBA4716.1	Infant Fecal Microbiome (Taxa)	5-6 months	stool_microbiome_infant	0.00201789	0.00201789	0.212934	-0.0448292	0.470697	0.105052	Higher in SVN
infant_taxa_56	Unknown_UBA4716.2	infant_taxa_56__Unknown_UBA4716.2	Infant Fecal Microbiome (Taxa)	5-6 months	stool_microbiome_infant	0.00201789	0.00201789	0.212934	-0.0448292	0.470697	0.105052	Higher in SVN
infant_taxa_56	Unknown_UBA4716.3	infant_taxa_56__Unknown_UBA4716.3	Infant Fecal Microbiome (Taxa)	5-6 months	stool_microbiome_infant	0.00201789	0.00201789	0.212934	-0.0448292	0.470697	0.105052	Higher in SVN
infant_taxa_56	Unknown_UBA1381	infant_taxa_56__Unknown_UBA1381	Infant Fecal Microbiome (Taxa)	5-6 months	stool_microbiome_infant	0.00201789	0.00201789	0.212934	-0.0448292	0.470697	0.105052	Higher in SVN
infant_taxa_56	Unknown_UBA1381.1	infant_taxa_56__Unknown_UBA1381.1	Infant Fecal Microbiome (Taxa)	5-6 months	stool_microbiome_infant	0.00201789	0.00201789	0.212934	-0.0448292	0.470697	0.105052	Higher in SVN
infant_taxa_56	Unknown_UBA1381.2	infant_taxa_56__Unknown_UBA1381.2	Infant Fecal Microbiome (Taxa)	5-6 months	stool_microbiome_infant	0.00201789	0.00201789	0.212934	-0.0448292	0.470697	0.105052	Higher in SVN
infant_taxa_56	Unknown_UBA1381.3	infant_taxa_56__Unknown_UBA1381.3	Infant Fecal Microbiome (Taxa)	5-6 months	stool_microbiome_infant	0.00201789	0.00201789	0.212934	-0.0448292	0.470697	0.105052	Higher in SVN
infant_taxa_56	Unknown_UBA1381.4	infant_taxa_56__Unknown_UBA1381.4	Infant Fecal Microbiome (Taxa)	5-6 months	stool_microbiome_infant	0.00201789	0.00201789	0.212934	-0.0448292	0.470697	0.105052	Higher in SVN
infant_taxa_56	Unknown_UBA1381.5	infant_taxa_56__Unknown_UBA1381.5	Infant Fecal Microbiome (Taxa)	5-6 months	stool_microbiome_infant	0.00201789	0.00201789	0.212934	-0.0448292	0.470697	0.105052	Higher in SVN
infant_taxa_56	Unknown_UBA1381.6	infant_taxa_56__Unknown_UBA1381.6	Infant Fecal Microbiome (Taxa)	5-6 months	stool_microbiome_infant	0.00201789	0.00201789	0.212934	-0.0448292	0.470697	0.105052	Higher in SVN
infant_taxa_56	Unknown_UBA1381.7	infant_taxa_56__Unknown_UBA1381.7	Infant Fecal Microbiome (Taxa)	5-6 months	stool_microbiome_infant	0.00201789	0.00201789	0.212934	-0.0448292	0.470697	0.105052	Higher in SVN
infant_taxa_56	Unknown_UBA1381.8	infant_taxa_56__Unknown_UBA1381.8	Infant Fecal Microbiome (Taxa)	5-6 months	stool_microbiome_infant	0.00201789	0.00201789	0.212934	-0.0448292	0.470697	0.105052	Higher in SVN
infant_taxa_56	Unknown_UBA1381.9	infant_taxa_56__Unknown_UBA1381.9	Infant Fecal Microbiome (Taxa)	5-6 months	stool_microbiome_infant	0.00201789	0.00201789	0.212934	-0.0448292	0.470697	0.105052	Higher in SVN
infant_taxa_56	Unknown_UBA1381.10	infant_taxa_56__Unknown_UBA1381.10	Infant Fecal Microbiome (Taxa)	5-6 months	stool_microbiome_infant	0.00201789	0.00201789	0.212934	-0.0448292	0.470697	0.105052	Higher in SVN
infant_taxa_56	Unknown_UBA1381.11	infant_taxa_56__Unknown_UBA1381.11	Infant Fecal Microbiome (Taxa)	5-6 months	stool_microbiome_infant	0.00201789	0.00201789	0.212934	-0.0448292	0.470697	0.105052	Higher in SVN
infant_taxa_56	Unknown_UBA1381.12	infant_taxa_56__Unknown_UBA1381.12	Infant Fecal Microbiome (Taxa)	5-6 months	stool_microbiome_infant	0.00201789	0.00201789	0.212934	-0.0448292	0.470697	0.105052	Higher in SVN
infant_taxa_56	Unknown_UBA1381.13	infant_taxa_56__Unknown_UBA1381.13	Infant Fecal Microbiome (Taxa)	5-6 months	stool_microbiome_infant	0.00201789	0.00201789	0.212934	-0.0448292	0.470697	0.105052	Higher in SVN
infant_taxa_56	Unknown_UBA1381.14	infant_taxa_56__Unknown_UBA1381.14	Infant Fecal Microbiome (Taxa)	5-6 months	stool_microbiome_infant	0.00201789	0.00201789	0.212934	-0.0448292	0.470697	0.105052	Higher in SVN
infant_taxa_56	Unknown_UBA1381.15	infant_taxa_56__Unknown_UBA1381.15	Infant Fecal Microbiome (Taxa)	5-6 months	stool_microbiome_infant	0.00201789	0.00201789	0.212934	-0.0448292	0.470697	0.105052	Higher in SVN
infant_taxa_56	Unknown_UBA1381.16	infant_taxa_56__Unknown_UBA1381.16	Infant Fecal Microbiome (Taxa)	5-6 months	stool_microbiome_infant	0.00201789	0.00201789	0.212934	-0.0448292	0.470697	0.105052	Higher in SVN
infant_taxa_56	UBA9506.sp003506415	infant_taxa_56__UBA9506.sp003506415	Infant Fecal Microbiome (Taxa)	5-6 months	stool_microbiome_infant	0.00201789	0.00201789	0.212934	-0.0448292	0.470697	0.105052	Higher in SVN
infant_taxa_56	UMGS755.sp900545185	infant_taxa_56__UMGS755.sp900545185	Infant Fecal Microbiome (Taxa)	5-6 months	stool_microbiome_infant	0.00201789	0.00201789	0.212934	-0.0448292	0.470697	0.105052	Higher in SVN
infant_taxa_56	Unknown_UMGS1253_1	infant_taxa_56__Unknown_UMGS1253_1	Infant Fecal Microbiome (Taxa)	5-6 months	stool_microbiome_infant	0.00201789	0.00201789	0.212934	-0.0448292	0.470697	0.105052	Higher in SVN
infant_taxa_56	Unknown_UMGS1253_2	infant_taxa_56__Unknown_UMGS1253_2	Infant Fecal Microbiome (Taxa)	5-6 months	stool_microbiome_infant	0.00201789	0.00201789	0.212934	-0.0448292	0.470697	0.105052	Higher in SVN
infant_taxa_56	Unknown_Monoglobales_A	infant_taxa_56__Unknown_Monoglobales_A	Infant Fecal Microbiome (Taxa)	5-6 months	stool_microbiome_infant	0.00201789	0.00201789	0.212934	-0.0448292	0.470697	0.105052	Higher in SVN
infant_taxa_56	Unknown_Monoglobales_A.1	infant_taxa_56__Unknown_Monoglobales_A.1	Infant Fecal Microbiome (Taxa)	5-6 months	stool_microbiome_infant	0.00201789	0.00201789	0.212934	-0.0448292	0.470697	0.105052	Higher in SVN
infant_taxa_56	CAG.177.sp000431775	infant_taxa_56__CAG.177.sp000431775	Infant Fecal Microbiome (Taxa)	5-6 months	stool_microbiome_infant	0.00201789	0.00201789	0.212934	-0.0448292	0.470697	0.105052	Higher in SVN
infant_taxa_56	CAG.177.sp003514385	infant_taxa_56__CAG.177.sp003514385	Infant Fecal Microbiome (Taxa)	5-6 months	stool_microbiome_infant	0.00201789	0.00201789	0.212934	-0.0448292	0.470697	0.105052	Higher in SVN
infant_taxa_56	CAG.177.sp003538135	infant_taxa_56__CAG.177.sp003538135	Infant Fecal Microbiome (Taxa)	5-6 months	stool_microbiome_infant	0.00201789	0.00201789	0.212934	-0.0448292	0.470697	0.105052	Higher in SVN
infant_taxa_56	CAG.180.sp000432435	infant_taxa_56__CAG.180.sp000432435	Infant Fecal Microbiome (Taxa)	5-6 months	stool_microbiome_infant	0.00201789	0.00201789	0.212934	-0.0448292	0.470697	0.105052	Higher in SVN
infant_taxa_56	Unknown_CAG.180	infant_taxa_56__Unknown_CAG.180	Infant Fecal Microbiome (Taxa)	5-6 months	stool_microbiome_infant	0.00201789	0.00201789	0.212934	-0.0448292	0.470697	0.105052	Higher in SVN
infant_taxa_56	CAG.217.sp000436335	infant_taxa_56__CAG.217.sp000436335	Infant Fecal Microbiome (Taxa)	5-6 months	stool_microbiome_infant	0.00201789	0.00201789	0.212934	-0.0448292	0.470697	0.105052	Higher in SVN
infant_taxa_56	CAG.488.sp000434055	infant_taxa_56__CAG.488.sp000434055	Infant Fecal Microbiome (Taxa)	5-6 months	stool_microbiome_infant	0.00201789	0.00201789	0.212934	-0.0448292	0.470697	0.105052	Higher in SVN
infant_taxa_56	CAG.488.sp000434915	infant_taxa_56__CAG.488.sp000434915	Infant Fecal Microbiome (Taxa)	5-6 months	stool_microbiome_infant	0.00201789	0.00201789	0.212934	-0.0448292	0.470697	0.105052	Higher in SVN
infant_taxa_56	CAG.488.sp003486665	infant_taxa_56__CAG.488.sp003486665	Infant Fecal Microbiome (Taxa)	5-6 months	stool_microbiome_infant	0.00201789	0.00201789	0.212934	-0.0448292	0.470697	0.105052	Higher in SVN
infant_taxa_56	CAG.488.sp900539465	infant_taxa_56__CAG.488.sp900539465	Infant Fecal Microbiome (Taxa)	5-6 months	stool_microbiome_infant	0.00201789	0.00201789	0.212934	-0.0448292	0.470697	0.105052	Higher in SVN
infant_taxa_56	CAG.488.sp900554995	infant_taxa_56__CAG.488.sp900554995	Infant Fecal Microbiome (Taxa)	5-6 months	stool_microbiome_infant	0.00201789	0.00201789	0.212934	-0.0448292	0.470697	0.105052	Higher in SVN
infant_taxa_56	Unknown_CAG.488	infant_taxa_56__Unknown_CAG.488	Infant Fecal Microbiome (Taxa)	5-6 months	stool_microbiome_infant	0.00201789	0.00201789	0.212934	-0.0448292	0.470697	0.105052	Higher in SVN
infant_taxa_56	Unknown_CAG.488.1	infant_taxa_56__Unknown_CAG.488.1	Infant Fecal Microbiome (Taxa)	5-6 months	stool_microbiome_infant	0.00201789	0.00201789	0.212934	-0.0448292	0.470697	0.105052	Higher in SVN
infant_taxa_56	CAG.557.sp000435275	infant_taxa_56__CAG.557.sp000435275	Infant Fecal Microbiome (Taxa)	5-6 months	stool_microbiome_infant	0.00201789	0.00201789	0.212934	-0.0448292	0.470697	0.105052	Higher in SVN
infant_taxa_56	Unknown_CAG.557	infant_taxa_56__Unknown_CAG.557	Infant Fecal Microbiome (Taxa)	5-6 months	stool_microbiome_infant	0.00201789	0.00201789	0.212934	-0.0448292	0.470697	0.105052	Higher in SVN
infant_taxa_56	CAG.964.sp000435335	infant_taxa_56__CAG.964.sp000435335	Infant Fecal Microbiome (Taxa)	5-6 months	stool_microbiome_infant	0.00201789	0.00201789	0.212934	-0.0448292	0.470697	0.105052	Higher in SVN
infant_taxa_56	Clostridium_E.jeddahense	infant_taxa_56__Clostridium_E.jeddahense	Infant Fecal Microbiome (Taxa)	5-6 months	stool_microbiome_infant	0.00201789	0.00201789	0.212934	-0.0448292	0.470697	0.105052	Higher in SVN
infant_taxa_56	DTU089_A.sp002440045	infant_taxa_56__DTU089_A.sp002440045	Infant Fecal Microbiome (Taxa)	5-6 months	stool_microbiome_infant	0.00201789	0.00201789	0.212934	-0.0448292	0.470697	0.105052	Higher in SVN
infant_taxa_56	Eubacterium_R.coprostanoligenes	infant_taxa_56__Eubacterium_R.coprostanoligenes	Infant Fecal Microbiome (Taxa)	5-6 months	stool_microbiome_infant	0.00201789	0.00201789	0.212934	-0.0448292	0.470697	0.105052	Higher in SVN
infant_taxa_56	Eubacterium_R.sp000433975	infant_taxa_56__Eubacterium_R.sp000433975	Infant Fecal Microbiome (Taxa)	5-6 months	stool_microbiome_infant	0.00201789	0.00201789	0.212934	-0.0448292	0.470697	0.105052	Higher in SVN
infant_taxa_56	Eubacterium_R.sp000434995	infant_taxa_56__Eubacterium_R.sp000434995	Infant Fecal Microbiome (Taxa)	5-6 months	stool_microbiome_infant	0.00201789	0.00201789	0.212934	-0.0448292	0.470697	0.105052	Higher in SVN
infant_taxa_56	Eubacterium_R.sp000436835	infant_taxa_56__Eubacterium_R.sp000436835	Infant Fecal Microbiome (Taxa)	5-6 months	stool_microbiome_infant	0.00201789	0.00201789	0.212934	-0.0448292	0.470697	0.105052	Higher in SVN
infant_taxa_56	Eubacterium_R.sp003526845	infant_taxa_56__Eubacterium_R.sp003526845	Infant Fecal Microbiome (Taxa)	5-6 months	stool_microbiome_infant	0.00201789	0.00201789	0.212934	-0.0448292	0.470697	0.105052	Higher in SVN
infant_taxa_56	Eubacterium_R.sp900539165	infant_taxa_56__Eubacterium_R.sp900539165	Infant Fecal Microbiome (Taxa)	5-6 months	stool_microbiome_infant	0.00201789	0.00201789	0.212934	-0.0448292	0.470697	0.105052	Higher in SVN
infant_taxa_56	Eubacterium_R.sp900539325	infant_taxa_56__Eubacterium_R.sp900539325	Infant Fecal Microbiome (Taxa)	5-6 months	stool_microbiome_infant	0.00201789	0.00201789	0.212934	-0.0448292	0.470697	0.105052	Higher in SVN
infant_taxa_56	Eubacterium_R.sp900540235	infant_taxa_56__Eubacterium_R.sp900540235	Infant Fecal Microbiome (Taxa)	5-6 months	stool_microbiome_infant	0.00201789	0.00201789	0.212934	-0.0448292	0.470697	0.105052	Higher in SVN
infant_taxa_56	Eubacterium_R.sp900542875	infant_taxa_56__Eubacterium_R.sp900542875	Infant Fecal Microbiome (Taxa)	5-6 months	stool_microbiome_infant	0.00201789	0.00201789	0.212934	-0.0448292	0.470697	0.105052	Higher in SVN
infant_taxa_56	Eubacterium_R.sp900548085	infant_taxa_56__Eubacterium_R.sp900548085	Infant Fecal Microbiome (Taxa)	5-6 months	stool_microbiome_infant	0.00201789	0.00201789	0.212934	-0.0448292	0.470697	0.105052	Higher in SVN
infant_taxa_56	Unknown_Eubacterium_R	infant_taxa_56__Unknown_Eubacterium_R	Infant Fecal Microbiome (Taxa)	5-6 months	stool_microbiome_infant	0.00201789	0.00201789	0.212934	-0.0448292	0.470697	0.105052	Higher in SVN
infant_taxa_56	Unknown_Eubacterium_R.1	infant_taxa_56__Unknown_Eubacterium_R.1	Infant Fecal Microbiome (Taxa)	5-6 months	stool_microbiome_infant	0.00201789	0.00201789	0.212934	-0.0448292	0.470697	0.105052	Higher in SVN
infant_taxa_56	Unknown_Eubacterium_R.2	infant_taxa_56__Unknown_Eubacterium_R.2	Infant Fecal Microbiome (Taxa)	5-6 months	stool_microbiome_infant	0.00201789	0.00201789	0.212934	-0.0448292	0.470697	0.105052	Higher in SVN
infant_taxa_56	Unknown_Eubacterium_R.3	infant_taxa_56__Unknown_Eubacterium_R.3	Infant Fecal Microbiome (Taxa)	5-6 months	stool_microbiome_infant	0.00201789	0.00201789	0.212934	-0.0448292	0.470697	0.105052	Higher in SVN
infant_taxa_56	Unknown_Eubacterium_R.4	infant_taxa_56__Unknown_Eubacterium_R.4	Infant Fecal Microbiome (Taxa)	5-6 months	stool_microbiome_infant	0.00201789	0.00201789	0.212934	-0.0448292	0.470697	0.105052	Higher in SVN
infant_taxa_56	GCA.900066995.sp900291955	infant_taxa_56__GCA.900066995.sp900291955	Infant Fecal Microbiome (Taxa)	5-6 months	stool_microbiome_infant	0.00201789	0.00201789	0.212934	-0.0448292	0.470697	0.105052	Higher in SVN
infant_taxa_56	Unknown_GCA.900066995	infant_taxa_56__Unknown_GCA.900066995	Infant Fecal Microbiome (Taxa)	5-6 months	stool_microbiome_infant	0.00201789	0.00201789	0.212934	-0.0448292	0.470697	0.105052	Higher in SVN
infant_taxa_56	RUG806.sp900313475	infant_taxa_56__RUG806.sp900313475	Infant Fecal Microbiome (Taxa)	5-6 months	stool_microbiome_infant	0.00201789	0.00201789	0.212934	-0.0448292	0.470697	0.105052	Higher in SVN
infant_taxa_56	Unknown_RUG806	infant_taxa_56__Unknown_RUG806	Infant Fecal Microbiome (Taxa)	5-6 months	stool_microbiome_infant	0.00201789	0.00201789	0.212934	-0.0448292	0.470697	0.105052	Higher in SVN
infant_taxa_56	Ruminococcus_E.bromii_A	infant_taxa_56__Ruminococcus_E.bromii_A	Infant Fecal Microbiome (Taxa)	5-6 months	stool_microbiome_infant	0.00201789	0.00201789	0.212934	-0.0448292	0.470697	0.105052	Higher in SVN
infant_taxa_56	Ruminococcus_E.bromii_B	infant_taxa_56__Ruminococcus_E.bromii_B	Infant Fecal Microbiome (Taxa)	5-6 months	stool_microbiome_infant	0.00201789	0.00201789	0.212934	-0.0448292	0.470697	0.105052	Higher in SVN
infant_taxa_56	Ruminococcus_E.sp003438075	infant_taxa_56__Ruminococcus_E.sp003438075	Infant Fecal Microbiome (Taxa)	5-6 months	stool_microbiome_infant	0.00201789	0.00201789	0.212934	-0.0448292	0.470697	0.105052	Higher in SVN
infant_taxa_56	Ruminococcus_E.sp003526955	infant_taxa_56__Ruminococcus_E.sp003526955	Infant Fecal Microbiome (Taxa)	5-6 months	stool_microbiome_infant	0.00201789	0.00201789	0.212934	-0.0448292	0.470697	0.105052	Higher in SVN
infant_taxa_56	Ruminococcus_E.sp900314705	infant_taxa_56__Ruminococcus_E.sp900314705	Infant Fecal Microbiome (Taxa)	5-6 months	stool_microbiome_infant	0.00201789	0.00201789	0.212934	-0.0448292	0.470697	0.105052	Higher in SVN
infant_taxa_56	Ruminococcus_E.sp900543095	infant_taxa_56__Ruminococcus_E.sp900543095	Infant Fecal Microbiome (Taxa)	5-6 months	stool_microbiome_infant	0.00201789	0.00201789	0.212934	-0.0448292	0.470697	0.105052	Higher in SVN
infant_taxa_56	Unknown_Ruminococcus_E	infant_taxa_56__Unknown_Ruminococcus_E	Infant Fecal Microbiome (Taxa)	5-6 months	stool_microbiome_infant	0.00201789	0.00201789	0.212934	-0.0448292	0.470697	0.105052	Higher in SVN
infant_taxa_56	Unknown_Ruminococcus_E.1	infant_taxa_56__Unknown_Ruminococcus_E.1	Infant Fecal Microbiome (Taxa)	5-6 months	stool_microbiome_infant	0.00201789	0.00201789	0.212934	-0.0448292	0.470697	0.105052	Higher in SVN
infant_taxa_56	Ruminococcus_H.sp003531055	infant_taxa_56__Ruminococcus_H.sp003531055	Infant Fecal Microbiome (Taxa)	5-6 months	stool_microbiome_infant	0.00201789	0.00201789	0.212934	-0.0448292	0.470697	0.105052	Higher in SVN
infant_taxa_56	Unknown_SFWF01	infant_taxa_56__Unknown_SFWF01	Infant Fecal Microbiome (Taxa)	5-6 months	stool_microbiome_infant	0.00201789	0.00201789	0.212934	-0.0448292	0.470697	0.105052	Higher in SVN
infant_taxa_56	UBA1081.sp900543395	infant_taxa_56__UBA1081.sp900543395	Infant Fecal Microbiome (Taxa)	5-6 months	stool_microbiome_infant	0.00201789	0.00201789	0.212934	-0.0448292	0.470697	0.105052	Higher in SVN
infant_taxa_56	Unknown_UBA1081	infant_taxa_56__Unknown_UBA1081	Infant Fecal Microbiome (Taxa)	5-6 months	stool_microbiome_infant	0.00201789	0.00201789	0.212934	-0.0448292	0.470697	0.105052	Higher in SVN
infant_taxa_56	UBA1227.sp900545655	infant_taxa_56__UBA1227.sp900545655	Infant Fecal Microbiome (Taxa)	5-6 months	stool_microbiome_infant	0.00201789	0.00201789	0.212934	-0.0448292	0.470697	0.105052	Higher in SVN
infant_taxa_56	UBA5905.sp002437905	infant_taxa_56__UBA5905.sp002437905	Infant Fecal Microbiome (Taxa)	5-6 months	stool_microbiome_infant	0.00201789	0.00201789	0.212934	-0.0448292	0.470697	0.105052	Higher in SVN
infant_taxa_56	UBA5905.sp004558485	infant_taxa_56__UBA5905.sp004558485	Infant Fecal Microbiome (Taxa)	5-6 months	stool_microbiome_infant	0.00201789	0.00201789	0.212934	-0.0448292	0.470697	0.105052	Higher in SVN
infant_taxa_56	UBA5905.sp900549155	infant_taxa_56__UBA5905.sp900549155	Infant Fecal Microbiome (Taxa)	5-6 months	stool_microbiome_infant	0.00201789	0.00201789	0.212934	-0.0448292	0.470697	0.105052	Higher in SVN
infant_taxa_56	Unknown_UBA5905	infant_taxa_56__Unknown_UBA5905	Infant Fecal Microbiome (Taxa)	5-6 months	stool_microbiome_infant	0.00201789	0.00201789	0.212934	-0.0448292	0.470697	0.105052	Higher in SVN
infant_taxa_56	Unknown_UBA5905.1	infant_taxa_56__Unknown_UBA5905.1	Infant Fecal Microbiome (Taxa)	5-6 months	stool_microbiome_infant	0.00201789	0.00201789	0.212934	-0.0448292	0.470697	0.105052	Higher in SVN
infant_taxa_56	Unknown_UBA5905.2	infant_taxa_56__Unknown_UBA5905.2	Infant Fecal Microbiome (Taxa)	5-6 months	stool_microbiome_infant	0.00201789	0.00201789	0.212934	-0.0448292	0.470697	0.105052	Higher in SVN
infant_taxa_56	Unknown_UBA5905.3	infant_taxa_56__Unknown_UBA5905.3	Infant Fecal Microbiome (Taxa)	5-6 months	stool_microbiome_infant	0.00201789	0.00201789	0.212934	-0.0448292	0.470697	0.105052	Higher in SVN
infant_taxa_56	UBA6857.sp900555805	infant_taxa_56__UBA6857.sp900555805	Infant Fecal Microbiome (Taxa)	5-6 months	stool_microbiome_infant	0.00201789	0.00201789	0.212934	-0.0448292	0.470697	0.105052	Higher in SVN
infant_taxa_56	Unknown_UBA6857	infant_taxa_56__Unknown_UBA6857	Infant Fecal Microbiome (Taxa)	5-6 months	stool_microbiome_infant	0.00201789	0.00201789	0.212934	-0.0448292	0.470697	0.105052	Higher in SVN
infant_taxa_56	Unknown_UBA6857.1	infant_taxa_56__Unknown_UBA6857.1	Infant Fecal Microbiome (Taxa)	5-6 months	stool_microbiome_infant	0.00201789	0.00201789	0.212934	-0.0448292	0.470697	0.105052	Higher in SVN
infant_taxa_56	Unknown_UBA6857.2	infant_taxa_56__Unknown_UBA6857.2	Infant Fecal Microbiome (Taxa)	5-6 months	stool_microbiome_infant	0.00201789	0.00201789	0.212934	-0.0448292	0.470697	0.105052	Higher in SVN
infant_taxa_56	Unknown_UBA6857.3	infant_taxa_56__Unknown_UBA6857.3	Infant Fecal Microbiome (Taxa)	5-6 months	stool_microbiome_infant	0.00201789	0.00201789	0.212934	-0.0448292	0.470697	0.105052	Higher in SVN
infant_taxa_56	UBA737.sp002431945	infant_taxa_56__UBA737.sp002431945	Infant Fecal Microbiome (Taxa)	5-6 months	stool_microbiome_infant	0.00201789	0.00201789	0.212934	-0.0448292	0.470697	0.105052	Higher in SVN
infant_taxa_56	UBA737.sp002451855	infant_taxa_56__UBA737.sp002451855	Infant Fecal Microbiome (Taxa)	5-6 months	stool_microbiome_infant	0.00201789	0.00201789	0.212934	-0.0448292	0.470697	0.105052	Higher in SVN
infant_taxa_56	UBA737.sp900543215	infant_taxa_56__UBA737.sp900543215	Infant Fecal Microbiome (Taxa)	5-6 months	stool_microbiome_infant	0.00201789	0.00201789	0.212934	-0.0448292	0.470697	0.105052	Higher in SVN
infant_taxa_56	UBA737.sp900547095	infant_taxa_56__UBA737.sp900547095	Infant Fecal Microbiome (Taxa)	5-6 months	stool_microbiome_infant	0.00201789	0.00201789	0.212934	-0.0448292	0.470697	0.105052	Higher in SVN
infant_taxa_56	UBA737.sp900547305	infant_taxa_56__UBA737.sp900547305	Infant Fecal Microbiome (Taxa)	5-6 months	stool_microbiome_infant	0.00201789	0.00201789	0.212934	-0.0448292	0.470697	0.105052	Higher in SVN
infant_taxa_56	UBA737.sp900549055	infant_taxa_56__UBA737.sp900549055	Infant Fecal Microbiome (Taxa)	5-6 months	stool_microbiome_infant	0.00201789	0.00201789	0.212934	-0.0448292	0.470697	0.105052	Higher in SVN
infant_taxa_56	UBA737.sp900549755	infant_taxa_56__UBA737.sp900549755	Infant Fecal Microbiome (Taxa)	5-6 months	stool_microbiome_infant	0.00201789	0.00201789	0.212934	-0.0448292	0.470697	0.105052	Higher in SVN
infant_taxa_56	UBA737.sp900549755.1	infant_taxa_56__UBA737.sp900549755.1	Infant Fecal Microbiome (Taxa)	5-6 months	stool_microbiome_infant	0.00201789	0.00201789	0.212934	-0.0448292	0.470697	0.105052	Higher in SVN
infant_taxa_56	Unknown_UBA737	infant_taxa_56__Unknown_UBA737	Infant Fecal Microbiome (Taxa)	5-6 months	stool_microbiome_infant	0.00201789	0.00201789	0.212934	-0.0448292	0.470697	0.105052	Higher in SVN
infant_taxa_56	Unknown_UBA737.1	infant_taxa_56__Unknown_UBA737.1	Infant Fecal Microbiome (Taxa)	5-6 months	stool_microbiome_infant	0.00201789	0.00201789	0.212934	-0.0448292	0.470697	0.105052	Higher in SVN
infant_taxa_56	Unknown_UBA737.2	infant_taxa_56__Unknown_UBA737.2	Infant Fecal Microbiome (Taxa)	5-6 months	stool_microbiome_infant	0.00201789	0.00201789	0.212934	-0.0448292	0.470697	0.105052	Higher in SVN
infant_taxa_56	Unknown_UBA737.3	infant_taxa_56__Unknown_UBA737.3	Infant Fecal Microbiome (Taxa)	5-6 months	stool_microbiome_infant	0.00201789	0.00201789	0.212934	-0.0448292	0.470697	0.105052	Higher in SVN
infant_taxa_56	Unknown_UBA737.4	infant_taxa_56__Unknown_UBA737.4	Infant Fecal Microbiome (Taxa)	5-6 months	stool_microbiome_infant	0.00201789	0.00201789	0.212934	-0.0448292	0.470697	0.105052	Higher in SVN
infant_taxa_56	Unknown_UBA737.5	infant_taxa_56__Unknown_UBA737.5	Infant Fecal Microbiome (Taxa)	5-6 months	stool_microbiome_infant	0.00201789	0.00201789	0.212934	-0.0448292	0.470697	0.105052	Higher in SVN
infant_taxa_56	Unknown_UBA737.6	infant_taxa_56__Unknown_UBA737.6	Infant Fecal Microbiome (Taxa)	5-6 months	stool_microbiome_infant	0.00201789	0.00201789	0.212934	-0.0448292	0.470697	0.105052	Higher in SVN
infant_taxa_56	Unknown_UBA737.7	infant_taxa_56__Unknown_UBA737.7	Infant Fecal Microbiome (Taxa)	5-6 months	stool_microbiome_infant	0.00201789	0.00201789	0.212934	-0.0448292	0.470697	0.105052	Higher in SVN
infant_taxa_56	Unknown_UBA737.8	infant_taxa_56__Unknown_UBA737.8	Infant Fecal Microbiome (Taxa)	5-6 months	stool_microbiome_infant	0.00201789	0.00201789	0.212934	-0.0448292	0.470697	0.105052	Higher in SVN
infant_taxa_56	Unknown_UBA737.9	infant_taxa_56__Unknown_UBA737.9	Infant Fecal Microbiome (Taxa)	5-6 months	stool_microbiome_infant	0.00201789	0.00201789	0.212934	-0.0448292	0.470697	0.105052	Higher in SVN
infant_taxa_56	Unknown_UMGS1071	infant_taxa_56__Unknown_UMGS1071	Infant Fecal Microbiome (Taxa)	5-6 months	stool_microbiome_infant	0.00201789	0.00201789	0.212934	-0.0448292	0.470697	0.105052	Higher in SVN
infant_taxa_56	Unknown_UMGS1071.1	infant_taxa_56__Unknown_UMGS1071.1	Infant Fecal Microbiome (Taxa)	5-6 months	stool_microbiome_infant	0.00201789	0.00201789	0.212934	-0.0448292	0.470697	0.105052	Higher in SVN
infant_taxa_56	Unknown_UMGS1071.2	infant_taxa_56__Unknown_UMGS1071.2	Infant Fecal Microbiome (Taxa)	5-6 months	stool_microbiome_infant	0.00201789	0.00201789	0.212934	-0.0448292	0.470697	0.105052	Higher in SVN
infant_taxa_56	UMGS1224.sp900549775	infant_taxa_56__UMGS1224.sp900549775	Infant Fecal Microbiome (Taxa)	5-6 months	stool_microbiome_infant	0.00201789	0.00201789	0.212934	-0.0448292	0.470697	0.105052	Higher in SVN
infant_taxa_56	UMGS1279.sp900550315	infant_taxa_56__UMGS1279.sp900550315	Infant Fecal Microbiome (Taxa)	5-6 months	stool_microbiome_infant	0.00201789	0.00201789	0.212934	-0.0448292	0.470697	0.105052	Higher in SVN
infant_taxa_56	Unknown_UMGS1279	infant_taxa_56__Unknown_UMGS1279	Infant Fecal Microbiome (Taxa)	5-6 months	stool_microbiome_infant	0.00201789	0.00201789	0.212934	-0.0448292	0.470697	0.105052	Higher in SVN
infant_taxa_56	Unknown_UMGS1279.1	infant_taxa_56__Unknown_UMGS1279.1	Infant Fecal Microbiome (Taxa)	5-6 months	stool_microbiome_infant	0.00201789	0.00201789	0.212934	-0.0448292	0.470697	0.105052	Higher in SVN
infant_taxa_56	UMGS1484.sp900552285	infant_taxa_56__UMGS1484.sp900552285	Infant Fecal Microbiome (Taxa)	5-6 months	stool_microbiome_infant	0.00201789	0.00201789	0.212934	-0.0448292	0.470697	0.105052	Higher in SVN
infant_taxa_56	Unknown_UMGS1484	infant_taxa_56__Unknown_UMGS1484	Infant Fecal Microbiome (Taxa)	5-6 months	stool_microbiome_infant	0.00201789	0.00201789	0.212934	-0.0448292	0.470697	0.105052	Higher in SVN
infant_taxa_56	Unknown_UMGS1484.1	infant_taxa_56__Unknown_UMGS1484.1	Infant Fecal Microbiome (Taxa)	5-6 months	stool_microbiome_infant	0.00201789	0.00201789	0.212934	-0.0448292	0.470697	0.105052	Higher in SVN
infant_taxa_56	UMGS1487.sp900552225	infant_taxa_56__UMGS1487.sp900552225	Infant Fecal Microbiome (Taxa)	5-6 months	stool_microbiome_infant	0.00201789	0.00201789	0.212934	-0.0448292	0.470697	0.105052	Higher in SVN
infant_taxa_56	Unknown_UMGS1487	infant_taxa_56__Unknown_UMGS1487	Infant Fecal Microbiome (Taxa)	5-6 months	stool_microbiome_infant	0.00201789	0.00201789	0.212934	-0.0448292	0.470697	0.105052	Higher in SVN
infant_taxa_56	Unknown_UMGS1487.1	infant_taxa_56__Unknown_UMGS1487.1	Infant Fecal Microbiome (Taxa)	5-6 months	stool_microbiome_infant	0.00201789	0.00201789	0.212934	-0.0448292	0.470697	0.105052	Higher in SVN
infant_taxa_56	UMGS1491.sp900552265	infant_taxa_56__UMGS1491.sp900552265	Infant Fecal Microbiome (Taxa)	5-6 months	stool_microbiome_infant	0.00201789	0.00201789	0.212934	-0.0448292	0.470697	0.105052	Higher in SVN
infant_taxa_56	UMGS1491.sp900554335	infant_taxa_56__UMGS1491.sp900554335	Infant Fecal Microbiome (Taxa)	5-6 months	stool_microbiome_infant	0.00201789	0.00201789	0.212934	-0.0448292	0.470697	0.105052	Higher in SVN
infant_taxa_56	UMGS1491.sp900554775	infant_taxa_56__UMGS1491.sp900554775	Infant Fecal Microbiome (Taxa)	5-6 months	stool_microbiome_infant	0.00201789	0.00201789	0.212934	-0.0448292	0.470697	0.105052	Higher in SVN
infant_taxa_56	Unknown_UMGS1491	infant_taxa_56__Unknown_UMGS1491	Infant Fecal Microbiome (Taxa)	5-6 months	stool_microbiome_infant	0.00201789	0.00201789	0.212934	-0.0448292	0.470697	0.105052	Higher in SVN
infant_taxa_56	Unknown_UMGS1491.1	infant_taxa_56__Unknown_UMGS1491.1	Infant Fecal Microbiome (Taxa)	5-6 months	stool_microbiome_infant	0.00201789	0.00201789	0.212934	-0.0448292	0.470697	0.105052	Higher in SVN
infant_taxa_56	Unknown_UMGS1491.2	infant_taxa_56__Unknown_UMGS1491.2	Infant Fecal Microbiome (Taxa)	5-6 months	stool_microbiome_infant	0.00201789	0.00201789	0.212934	-0.0448292	0.470697	0.105052	Higher in SVN
infant_taxa_56	Unknown_UMGS1491.3	infant_taxa_56__Unknown_UMGS1491.3	Infant Fecal Microbiome (Taxa)	5-6 months	stool_microbiome_infant	0.00201789	0.00201789	0.212934	-0.0448292	0.470697	0.105052	Higher in SVN
infant_taxa_56	Unknown_UMGS1491.4	infant_taxa_56__Unknown_UMGS1491.4	Infant Fecal Microbiome (Taxa)	5-6 months	stool_microbiome_infant	0.00201789	0.00201789	0.212934	-0.0448292	0.470697	0.105052	Higher in SVN
infant_taxa_56	Unknown_UMGS1491.5	infant_taxa_56__Unknown_UMGS1491.5	Infant Fecal Microbiome (Taxa)	5-6 months	stool_microbiome_infant	0.00201789	0.00201789	0.212934	-0.0448292	0.470697	0.105052	Higher in SVN
infant_taxa_56	Unknown_UMGS1491.6	infant_taxa_56__Unknown_UMGS1491.6	Infant Fecal Microbiome (Taxa)	5-6 months	stool_microbiome_infant	0.00201789	0.00201789	0.212934	-0.0448292	0.470697	0.105052	Higher in SVN
infant_taxa_56	Unknown_UMGS1491.7	infant_taxa_56__Unknown_UMGS1491.7	Infant Fecal Microbiome (Taxa)	5-6 months	stool_microbiome_infant	0.00201789	0.00201789	0.212934	-0.0448292	0.470697	0.105052	Higher in SVN
infant_taxa_56	Unknown_UMGS1491.8	infant_taxa_56__Unknown_UMGS1491.8	Infant Fecal Microbiome (Taxa)	5-6 months	stool_microbiome_infant	0.00201789	0.00201789	0.212934	-0.0448292	0.470697	0.105052	Higher in SVN
infant_taxa_56	UMGS1532.sp900552605	infant_taxa_56__UMGS1532.sp900552605	Infant Fecal Microbiome (Taxa)	5-6 months	stool_microbiome_infant	0.00201789	0.00201789	0.212934	-0.0448292	0.470697	0.105052	Higher in SVN
infant_taxa_56	Unknown_UMGS1623	infant_taxa_56__Unknown_UMGS1623	Infant Fecal Microbiome (Taxa)	5-6 months	stool_microbiome_infant	0.00201789	0.00201789	0.212934	-0.0448292	0.470697	0.105052	Higher in SVN
infant_taxa_56	Unknown_UMGS1623.1	infant_taxa_56__Unknown_UMGS1623.1	Infant Fecal Microbiome (Taxa)	5-6 months	stool_microbiome_infant	0.00201789	0.00201789	0.212934	-0.0448292	0.470697	0.105052	Higher in SVN
infant_taxa_56	UMGS172.sp900539855	infant_taxa_56__UMGS172.sp900539855	Infant Fecal Microbiome (Taxa)	5-6 months	stool_microbiome_infant	0.00201789	0.00201789	0.212934	-0.0448292	0.470697	0.105052	Higher in SVN
infant_taxa_56	Unknown_UMGS172	infant_taxa_56__Unknown_UMGS172	Infant Fecal Microbiome (Taxa)	5-6 months	stool_microbiome_infant	0.00201789	0.00201789	0.212934	-0.0448292	0.470697	0.105052	Higher in SVN
infant_taxa_56	Unknown_UMGS1858	infant_taxa_56__Unknown_UMGS1858	Infant Fecal Microbiome (Taxa)	5-6 months	stool_microbiome_infant	0.00201789	0.00201789	0.212934	-0.0448292	0.470697	0.105052	Higher in SVN
infant_taxa_56	UMGS1976.sp900556765	infant_taxa_56__UMGS1976.sp900556765	Infant Fecal Microbiome (Taxa)	5-6 months	stool_microbiome_infant	0.00201789	0.00201789	0.212934	-0.0448292	0.470697	0.105052	Higher in SVN
infant_taxa_56	UMGS856.sp900546265	infant_taxa_56__UMGS856.sp900546265	Infant Fecal Microbiome (Taxa)	5-6 months	stool_microbiome_infant	0.00201789	0.00201789	0.212934	-0.0448292	0.470697	0.105052	Higher in SVN
infant_taxa_56	Unknown_Acutalibacteraceae	infant_taxa_56__Unknown_Acutalibacteraceae	Infant Fecal Microbiome (Taxa)	5-6 months	stool_microbiome_infant	0.00201789	0.00201789	0.212934	-0.0448292	0.470697	0.105052	Higher in SVN
infant_taxa_56	Unknown_Acutalibacteraceae.1	infant_taxa_56__Unknown_Acutalibacteraceae.1	Infant Fecal Microbiome (Taxa)	5-6 months	stool_microbiome_infant	0.00201789	0.00201789	0.212934	-0.0448292	0.470697	0.105052	Higher in SVN
infant_taxa_56	Unknown_Acutalibacteraceae.2	infant_taxa_56__Unknown_Acutalibacteraceae.2	Infant Fecal Microbiome (Taxa)	5-6 months	stool_microbiome_infant	0.00201789	0.00201789	0.212934	-0.0448292	0.470697	0.105052	Higher in SVN
infant_taxa_56	Unknown_Acutalibacteraceae.3	infant_taxa_56__Unknown_Acutalibacteraceae.3	Infant Fecal Microbiome (Taxa)	5-6 months	stool_microbiome_infant	0.00201789	0.00201789	0.212934	-0.0448292	0.470697	0.105052	Higher in SVN
infant_taxa_56	Unknown_Acutalibacteraceae.4	infant_taxa_56__Unknown_Acutalibacteraceae.4	Infant Fecal Microbiome (Taxa)	5-6 months	stool_microbiome_infant	0.00201789	0.00201789	0.212934	-0.0448292	0.470697	0.105052	Higher in SVN
infant_taxa_56	Unknown_Acutalibacteraceae.5	infant_taxa_56__Unknown_Acutalibacteraceae.5	Infant Fecal Microbiome (Taxa)	5-6 months	stool_microbiome_infant	0.00201789	0.00201789	0.212934	-0.0448292	0.470697	0.105052	Higher in SVN
infant_taxa_56	Unknown_Acutalibacteraceae.6	infant_taxa_56__Unknown_Acutalibacteraceae.6	Infant Fecal Microbiome (Taxa)	5-6 months	stool_microbiome_infant	0.00201789	0.00201789	0.212934	-0.0448292	0.470697	0.105052	Higher in SVN
infant_taxa_56	Unknown_Acutalibacteraceae.7	infant_taxa_56__Unknown_Acutalibacteraceae.7	Infant Fecal Microbiome (Taxa)	5-6 months	stool_microbiome_infant	0.00201789	0.00201789	0.212934	-0.0448292	0.470697	0.105052	Higher in SVN
infant_taxa_56	Unknown_Acutalibacteraceae.8	infant_taxa_56__Unknown_Acutalibacteraceae.8	Infant Fecal Microbiome (Taxa)	5-6 months	stool_microbiome_infant	0.00201789	0.00201789	0.212934	-0.0448292	0.470697	0.105052	Higher in SVN
infant_taxa_56	Unknown_Acutalibacteraceae.9	infant_taxa_56__Unknown_Acutalibacteraceae.9	Infant Fecal Microbiome (Taxa)	5-6 months	stool_microbiome_infant	0.00201789	0.00201789	0.212934	-0.0448292	0.470697	0.105052	Higher in SVN
infant_taxa_56	Unknown_Acutalibacteraceae.10	infant_taxa_56__Unknown_Acutalibacteraceae.10	Infant Fecal Microbiome (Taxa)	5-6 months	stool_microbiome_infant	0.00201789	0.00201789	0.212934	-0.0448292	0.470697	0.105052	Higher in SVN
infant_taxa_56	Unknown_Acutalibacteraceae.11	infant_taxa_56__Unknown_Acutalibacteraceae.11	Infant Fecal Microbiome (Taxa)	5-6 months	stool_microbiome_infant	0.00201789	0.00201789	0.212934	-0.0448292	0.470697	0.105052	Higher in SVN
infant_taxa_56	Unknown_Acutalibacteraceae.12	infant_taxa_56__Unknown_Acutalibacteraceae.12	Infant Fecal Microbiome (Taxa)	5-6 months	stool_microbiome_infant	0.00201789	0.00201789	0.212934	-0.0448292	0.470697	0.105052	Higher in SVN
infant_taxa_56	Unknown_Acutalibacteraceae.13	infant_taxa_56__Unknown_Acutalibacteraceae.13	Infant Fecal Microbiome (Taxa)	5-6 months	stool_microbiome_infant	0.00201789	0.00201789	0.212934	-0.0448292	0.470697	0.105052	Higher in SVN
infant_taxa_56	Unknown_Acutalibacteraceae.14	infant_taxa_56__Unknown_Acutalibacteraceae.14	Infant Fecal Microbiome (Taxa)	5-6 months	stool_microbiome_infant	0.00201789	0.00201789	0.212934	-0.0448292	0.470697	0.105052	Higher in SVN
infant_taxa_56	Unknown_Acutalibacteraceae.15	infant_taxa_56__Unknown_Acutalibacteraceae.15	Infant Fecal Microbiome (Taxa)	5-6 months	stool_microbiome_infant	0.00201789	0.00201789	0.212934	-0.0448292	0.470697	0.105052	Higher in SVN
infant_taxa_56	Unknown_Acutalibacteraceae.16	infant_taxa_56__Unknown_Acutalibacteraceae.16	Infant Fecal Microbiome (Taxa)	5-6 months	stool_microbiome_infant	0.00201789	0.00201789	0.212934	-0.0448292	0.470697	0.105052	Higher in SVN
infant_taxa_56	Unknown_Acutalibacteraceae.17	infant_taxa_56__Unknown_Acutalibacteraceae.17	Infant Fecal Microbiome (Taxa)	5-6 months	stool_microbiome_infant	0.00201789	0.00201789	0.212934	-0.0448292	0.470697	0.105052	Higher in SVN
infant_taxa_56	Unknown_Acutalibacteraceae.18	infant_taxa_56__Unknown_Acutalibacteraceae.18	Infant Fecal Microbiome (Taxa)	5-6 months	stool_microbiome_infant	0.00201789	0.00201789	0.212934	-0.0448292	0.470697	0.105052	Higher in SVN
infant_taxa_56	AM07.15.sp003477405	infant_taxa_56__AM07.15.sp003477405	Infant Fecal Microbiome (Taxa)	5-6 months	stool_microbiome_infant	0.00201789	0.00201789	0.212934	-0.0448292	0.470697	0.105052	Higher in SVN
infant_taxa_56	Agathobaculum.butyriciproducens	infant_taxa_56__Agathobaculum.butyriciproducens	Infant Fecal Microbiome (Taxa)	5-6 months	stool_microbiome_infant	0.00201789	0.00201789	-0.110994	-0.369632	0.147645	0.398979	Lower in SVN
infant_taxa_56	Agathobaculum.sp003481705	infant_taxa_56__Agathobaculum.sp003481705	Infant Fecal Microbiome (Taxa)	5-6 months	stool_microbiome_infant	0.00201789	0.00201789	0.212934	-0.0448292	0.470697	0.105052	Higher in SVN
infant_taxa_56	Agathobaculum.sp900544475	infant_taxa_56__Agathobaculum.sp900544475	Infant Fecal Microbiome (Taxa)	5-6 months	stool_microbiome_infant	0.00201789	0.00201789	0.212934	-0.0448292	0.470697	0.105052	Higher in SVN
infant_taxa_56	Agathobaculum.sp900555465	infant_taxa_56__Agathobaculum.sp900555465	Infant Fecal Microbiome (Taxa)	5-6 months	stool_microbiome_infant	0.00201789	0.00201789	0.212934	-0.0448292	0.470697	0.105052	Higher in SVN
[truncated: 340 more rows]

## Sheet: dWHZ_later_comp2
block	feature	feature_model	block_label	timepoint	block_key	signed_score	score	beta_svn	conf.low	conf.high	p_value	svn_direction	mz	rt	ion_mode	mummi_EID	mummi_compounds	mummi_compound_names
[truncated: 1,475 more rows]
