# Supplementary material
Source: Research Square preprint supplement (doi:10.21203/rs.3.rs-10243829/v1)
Supplement: Supplementary file 4 [file ea426f5e05aed65085dfe167.xlsx]

## Sheet: description
DIABLO_svn_early & DIABLO_svn_later
Column	Explanation	Remarks
block:	Omics data block from which the metabolite feature was selected.
comp:	Latent DIABLO component on which the feature contributed.
feature:	Feature identifier as represented in the metabolomics dataset.
timepoint:	Sampling time point at which the feature was measured.
loading:	DIABLO loading value for the feature.
corr_case:	Correlation between the feature and case status or case-related component structure.
direction:	Direction of association with case status (higher in cases or controls).
score:	Composite ranking metric used to prioritize features.
block_label:	Human-readable label for the omics block.
mz:	Mass-to-charge ratio of the metabolite feature.	for metabolome features only
rt:	Retention time of the metabolite feature.	for metabolome features only
mummi_EID:	Mummichog empirical feature identifier.	for metabolome features only; from mummichog
mummi_compounds:	Candidate compound IDs matched by Mummichog.	for metabolome features only; from mummichog
mummi_compound_names:	Candidate compound names assigned by Mummichog.	for metabolome features only; from mummichog
mummi_ion_mode:	Ionization mode used for metabolite detection and annotation.	for metabolome features only; from mummichog
annotation	Final annotation assigned to the metabolite feature, where available.	for metabolome features only; from mummichog
haz_mixed_models_early & haz_mixed_models_later
comp:	Latent DIABLO component from which the feature was selected.
block:	Omics data block to which the feature belongs.
feature:	Feature identifier as represented in the input dataset.
score:	Composite ranking metric used to prioritize features for downstream modeling.
n_obs:	Number of observations included in the mixed-effects model for that feature.
n_id:	Number of unique participants included in the mixed-effects model for that feature.
beta_feature:	Estimated main effect of the feature on HAZ in the mixed-effects model.
conf.low:	Lower bound of the confidence interval for beta_feature.
conf.high:	Upper bound of the confidence interval for beta_feature.
p_feature:	Nominal p-value for the main effect of the feature.
beta_int:	Estimated interaction effect between the feature and time or growth trajectory term, depending on model specification.
p_int:	Nominal p-value for the interaction term.
p_feature_fdr:	False discovery rate-adjusted p-value for the main effect of the feature.
p_int_fdr:	False discovery rate-adjusted p-value for the interaction term.
block_label:	Human-readable label for the corresponding omics block.
mediation_glutamine_serine
outcome	Growth outcome variable used in the mediation model (e.g., c_haz6, c_waz6, c_height6)
mediator	Milk metabolite tested as mediator (Glutamine or Serine)
n	Sample size included in that mediation model
a_svn_to_mediator	a path: effect of SVN status on the mediator. Negative values mean SVN infants had lower metabolite levels; positive values mean higher levels.
a_p	p-value for the a path
b_mediator_to_outcome	b path: association between mediator and growth outcome after adjusting for SVN status
b_p	p-value for the b path
direct	Direct effect (c′): effect of SVN on the outcome that is not explained by the mediator
direct_low	Lower 95% CI for direct effect
direct_high	Upper 95% CI for direct effect
direct_p	p-value for direct effect
indirect	Indirect effect (a × b): amount of the SVN effect transmitted through the mediator
indirect_low	Lower bootstrap 95% CI for indirect effect
indirect_high	Upper bootstrap 95% CI for indirect effect
indirect_p	p-value for indirect effect
total	Total effect (c) = direct + indirect effect
total_low	Lower 95% CI for total effect
total_high	Upper 95% CI for total effect
total_p	p-value for total effect
prop_mediated	Proportion of the total effect explained by the mediator (= indirect / total)
prop_low	Lower CI for proportion mediated
prop_high	Upper CI for proportion mediated
prop_p	p-value for proportion mediated
indirect_FDR	BH-adjusted p-value for indirect effect across all tested outcomes
prop_FDR	BH-adjusted p-value for proportion mediated
domain	Growth domain (LAZ, WAZ, Height, Weight, MUAC, WHZ, HC) added during plotting
month	Age corresponding to the outcome (1,2,3,4,5,6,7,9,11 months)
indirect_sig	Logical variable indicating whether the indirect-effect CI excludes 0
prop_percent	prop_mediated × 100; percentage of the SVN effect mediated by the metabolite
prop_label	Text label used on the heatmap (e.g., "22%")

## Sheet: DIABLO_svn_early
block	comp	feature	timepoint	loading	corr_case	direction	score	block_label	mz	rt	ion_mode	mummi_EID	mummi_compounds	mummi_compound_names
infant_gene_12	1	K01915	1-2 months	0.349911	-0.191314	Lower in Case	0.0669428	Infant Fecal Metagenome (Genes) at 1-2m
infant_gene_12	1	K20419	1-2 months	0.299116	-0.197746	Lower in Case	0.059149	Infant Fecal Metagenome (Genes) at 1-2m
infant_gene_12	1	K03496	1-2 months	0.233065	-0.2155	Lower in Case	0.0502257	Infant Fecal Metagenome (Genes) at 1-2m
infant_gene_12	1	K03527	1-2 months	0.261976	-0.187902	Lower in Case	0.0492258	Infant Fecal Metagenome (Genes) at 1-2m
infant_gene_12	1	K02355	1-2 months	0.237095	-0.167035	Lower in Case	0.0396033	Infant Fecal Metagenome (Genes) at 1-2m
infant_gene_12	1	K01662	1-2 months	0.199635	-0.195997	Lower in Case	0.0391279	Infant Fecal Metagenome (Genes) at 1-2m
infant_gene_12	1	K01929	1-2 months	0.220521	-0.174671	Lower in Case	0.0385186	Infant Fecal Metagenome (Genes) at 1-2m
infant_gene_12	1	K03701	1-2 months	0.190842	-0.187301	Lower in Case	0.0357448	Infant Fecal Metagenome (Genes) at 1-2m
infant_gene_12	1	K02899	1-2 months	0.200057	-0.176595	Lower in Case	0.0353289	Infant Fecal Metagenome (Genes) at 1-2m
infant_gene_12	1	K05540	1-2 months	0.195221	-0.167583	Lower in Case	0.0327158	Infant Fecal Metagenome (Genes) at 1-2m
infant_gene_12	1	K03595	1-2 months	0.195825	-0.165984	Lower in Case	0.0325037	Infant Fecal Metagenome (Genes) at 1-2m
infant_gene_12	1	K01265	1-2 months	0.168123	-0.193051	Lower in Case	0.0324562	Infant Fecal Metagenome (Genes) at 1-2m
infant_gene_12	1	K02959	1-2 months	0.193156	-0.160505	Lower in Case	0.0310024	Infant Fecal Metagenome (Genes) at 1-2m
infant_gene_12	1	K02115	1-2 months	0.189513	-0.162564	Lower in Case	0.030808	Infant Fecal Metagenome (Genes) at 1-2m
infant_gene_12	1	K02878	1-2 months	0.168063	-0.182079	Lower in Case	0.0306007	Infant Fecal Metagenome (Genes) at 1-2m
infant_gene_12	1	K07056	1-2 months	0.166318	-0.180551	Lower in Case	0.0300289	Infant Fecal Metagenome (Genes) at 1-2m
infant_gene_12	1	K00954	1-2 months	0.165511	-0.178401	Lower in Case	0.0295274	Infant Fecal Metagenome (Genes) at 1-2m
infant_gene_12	1	K02948	1-2 months	0.157909	-0.17469	Lower in Case	0.0275851	Infant Fecal Metagenome (Genes) at 1-2m
infant_gene_12	1	K01736	1-2 months	0.157339	-0.173243	Lower in Case	0.0272579	Infant Fecal Metagenome (Genes) at 1-2m
infant_gene_12	1	K01735	1-2 months	0.126126	-0.190539	Lower in Case	0.024032	Infant Fecal Metagenome (Genes) at 1-2m
infant_gene_12	1	K02956	1-2 months	0.135096	-0.157307	Lower in Case	0.0212516	Infant Fecal Metagenome (Genes) at 1-2m
infant_gene_12	1	K02982	1-2 months	0.110198	-0.181636	Lower in Case	0.020016	Infant Fecal Metagenome (Genes) at 1-2m
infant_gene_12	1	K01876	1-2 months	0.101808	-0.166872	Lower in Case	0.016989	Infant Fecal Metagenome (Genes) at 1-2m
infant_gene_12	1	K08316	1-2 months	0.108984	-0.150861	Lower in Case	0.0164415	Infant Fecal Metagenome (Genes) at 1-2m
infant_gene_12	1	K03550	1-2 months	0.103368	-0.146781	Lower in Case	0.0151725	Infant Fecal Metagenome (Genes) at 1-2m
infant_gene_12	1	K06207	1-2 months	0.087588	-0.15747	Lower in Case	0.0137925	Infant Fecal Metagenome (Genes) at 1-2m
infant_gene_12	1	K06941	1-2 months	0.0754376	-0.182641	Lower in Case	0.013778	Infant Fecal Metagenome (Genes) at 1-2m
infant_gene_12	1	K00962	1-2 months	0.0815986	-0.153591	Lower in Case	0.0125328	Infant Fecal Metagenome (Genes) at 1-2m
infant_gene_12	1	K01465	1-2 months	0.06726	-0.171556	Lower in Case	0.0115389	Infant Fecal Metagenome (Genes) at 1-2m
infant_gene_12	1	K02886	1-2 months	0.0656278	-0.167375	Lower in Case	0.0109844	Infant Fecal Metagenome (Genes) at 1-2m
infant_gene_12	1	K20706	1-2 months	0.050247	-0.198876	Lower in Case	0.00999293	Infant Fecal Metagenome (Genes) at 1-2m
infant_gene_12	1	K00800	1-2 months	0.0491416	-0.193397	Lower in Case	0.00950383	Infant Fecal Metagenome (Genes) at 1-2m
infant_gene_12	1	K02990	1-2 months	0.0518737	-0.167962	Lower in Case	0.00871282	Infant Fecal Metagenome (Genes) at 1-2m
infant_gene_12	1	K02916	1-2 months	0.0580014	-0.140622	Lower in Case	0.00815625	Infant Fecal Metagenome (Genes) at 1-2m
infant_gene_12	1	K03685	1-2 months	0.0492095	-0.15672	Lower in Case	0.00771211	Infant Fecal Metagenome (Genes) at 1-2m
infant_gene_12	1	K00554	1-2 months	0.0519495	-0.147427	Lower in Case	0.00765877	Infant Fecal Metagenome (Genes) at 1-2m
infant_gene_12	1	K06168	1-2 months	0.0353189	-0.200152	Lower in Case	0.00706916	Infant Fecal Metagenome (Genes) at 1-2m
infant_gene_12	1	K00764	1-2 months	0.0415485	-0.161658	Lower in Case	0.00671666	Infant Fecal Metagenome (Genes) at 1-2m
infant_gene_12	1	K07447	1-2 months	0.0414901	-0.158129	Lower in Case	0.00656076	Infant Fecal Metagenome (Genes) at 1-2m
infant_gene_12	1	K14155	1-2 months	0.0267281	-0.179604	Lower in Case	0.00480048	Infant Fecal Metagenome (Genes) at 1-2m
infant_gene_12	1	K03977	1-2 months	0.0294626	-0.154727	Lower in Case	0.00455865	Infant Fecal Metagenome (Genes) at 1-2m
infant_gene_12	1	K01956	1-2 months	0.0225835	-0.157499	Lower in Case	0.00355688	Infant Fecal Metagenome (Genes) at 1-2m
infant_gene_12	1	K00789	1-2 months	0.0236921	-0.148059	Lower in Case	0.00350782	Infant Fecal Metagenome (Genes) at 1-2m
infant_gene_12	1	K03043	1-2 months	0.0199062	-0.169657	Lower in Case	0.00337723	Infant Fecal Metagenome (Genes) at 1-2m
infant_gene_12	1	K00927	1-2 months	0.0223592	-0.149249	Lower in Case	0.0033371	Infant Fecal Metagenome (Genes) at 1-2m
infant_gene_12	1	K00099	1-2 months	0.0159663	-0.161959	Lower in Case	0.00258589	Infant Fecal Metagenome (Genes) at 1-2m
infant_gene_12	1	K18189	1-2 months	0.0136216	-0.14541	Lower in Case	0.00198071	Infant Fecal Metagenome (Genes) at 1-2m
infant_gene_12	1	K03106	1-2 months	0.0119027	-0.153792	Lower in Case	0.00183054	Infant Fecal Metagenome (Genes) at 1-2m
infant_gene_12	1	K00791	1-2 months	0.00603758	-0.152713	Lower in Case	0.000922016	Infant Fecal Metagenome (Genes) at 1-2m
infant_gene_12	1	K02911	1-2 months	0.00014899	-0.154955	Lower in Case	2.30867e-05	Infant Fecal Metagenome (Genes) at 1-2m
infant_taxa_12	1	Unknown_LC.2	1-2 months	-0.058722	0.146501	Higher in Case	0.00860283	Infant Fecal Microbiome (Taxa) at 1-2m
infant_taxa_12	1	Methanobrevibacter_A.smithii	1-2 months	-0.058722	0.146501	Higher in Case	0.00860283	Infant Fecal Microbiome (Taxa) at 1-2m
infant_taxa_12	1	Methanosphaera.stadtmanae	1-2 months	-0.058722	0.146501	Higher in Case	0.00860283	Infant Fecal Microbiome (Taxa) at 1-2m
infant_taxa_12	1	MX.02.sp006954405	1-2 months	-0.058722	0.146501	Higher in Case	0.00860283	Infant Fecal Microbiome (Taxa) at 1-2m
infant_taxa_12	1	Methanomethylophilus.alvus	1-2 months	-0.058722	0.146501	Higher in Case	0.00860283	Infant Fecal Microbiome (Taxa) at 1-2m
infant_taxa_12	1	UBA71.sp006954465	1-2 months	-0.058722	0.146501	Higher in Case	0.00860283	Infant Fecal Microbiome (Taxa) at 1-2m
infant_taxa_12	1	Unknown_UBA71	1-2 months	-0.058722	0.146501	Higher in Case	0.00860283	Infant Fecal Microbiome (Taxa) at 1-2m
infant_taxa_12	1	Unknown_Arcanobacterium_A	1-2 months	-0.058722	0.146501	Higher in Case	0.00860283	Infant Fecal Microbiome (Taxa) at 1-2m
infant_taxa_12	1	Unknown_Arcanobacterium_A.1	1-2 months	-0.058722	0.146501	Higher in Case	0.00860283	Infant Fecal Microbiome (Taxa) at 1-2m
infant_taxa_12	1	Gleimia.europaea_A	1-2 months	-0.058722	0.146501	Higher in Case	0.00860283	Infant Fecal Microbiome (Taxa) at 1-2m
infant_taxa_12	1	Pauljensenia.sp001838165	1-2 months	-0.058722	0.146501	Higher in Case	0.00860283	Infant Fecal Microbiome (Taxa) at 1-2m
infant_taxa_12	1	Pauljensenia.turicensis	1-2 months	-0.058722	0.146501	Higher in Case	0.00860283	Infant Fecal Microbiome (Taxa) at 1-2m
infant_taxa_12	1	Alloscardovia.omnicolens	1-2 months	-0.058722	0.146501	Higher in Case	0.00860283	Infant Fecal Microbiome (Taxa) at 1-2m
infant_taxa_12	1	Bifidobacterium.adolescentis	1-2 months	-0.058722	0.146501	Higher in Case	0.00860283	Infant Fecal Microbiome (Taxa) at 1-2m
infant_taxa_12	1	Bifidobacterium.pseudocatenulatum	1-2 months	-0.058722	0.146501	Higher in Case	0.00860283	Infant Fecal Microbiome (Taxa) at 1-2m
infant_taxa_12	1	Bifidobacterium.vaginale	1-2 months	-0.058722	0.146501	Higher in Case	0.00860283	Infant Fecal Microbiome (Taxa) at 1-2m
infant_taxa_12	1	Bifidobacterium.vaginale_G	1-2 months	-0.058722	0.146501	Higher in Case	0.00860283	Infant Fecal Microbiome (Taxa) at 1-2m
infant_taxa_12	1	Dermabacter.hominis	1-2 months	-0.058722	0.146501	Higher in Case	0.00860283	Infant Fecal Microbiome (Taxa) at 1-2m
infant_taxa_12	1	Rothia.mucilaginosa_A	1-2 months	-0.058722	0.146501	Higher in Case	0.00860283	Infant Fecal Microbiome (Taxa) at 1-2m
infant_taxa_12	1	Cutibacterium.avidum	1-2 months	-0.058722	0.146501	Higher in Case	0.00860283	Infant Fecal Microbiome (Taxa) at 1-2m
infant_taxa_12	1	Fannyhessea.vaginae	1-2 months	-0.058722	0.146501	Higher in Case	0.00860283	Infant Fecal Microbiome (Taxa) at 1-2m
infant_taxa_12	1	Olsenella_B.sp000752675	1-2 months	-0.058722	0.146501	Higher in Case	0.00860283	Infant Fecal Microbiome (Taxa) at 1-2m
infant_taxa_12	1	Olsenella_E.provencensis	1-2 months	-0.058722	0.146501	Higher in Case	0.00860283	Infant Fecal Microbiome (Taxa) at 1-2m
infant_taxa_12	1	Olsenella_E.sp003150175	1-2 months	-0.058722	0.146501	Higher in Case	0.00860283	Infant Fecal Microbiome (Taxa) at 1-2m
infant_taxa_12	1	Olsenella_E.sp900540955	1-2 months	-0.058722	0.146501	Higher in Case	0.00860283	Infant Fecal Microbiome (Taxa) at 1-2m
infant_taxa_12	1	Unknown_Olsenella_E	1-2 months	-0.058722	0.146501	Higher in Case	0.00860283	Infant Fecal Microbiome (Taxa) at 1-2m
infant_taxa_12	1	Parolsenella.sp900544655	1-2 months	-0.058722	0.146501	Higher in Case	0.00860283	Infant Fecal Microbiome (Taxa) at 1-2m
infant_taxa_12	1	Unknown_Atopobiaceae	1-2 months	-0.058722	0.146501	Higher in Case	0.00860283	Infant Fecal Microbiome (Taxa) at 1-2m
infant_taxa_12	1	Collinsella.bouchesdurhonensis	1-2 months	-0.058722	0.146501	Higher in Case	0.00860283	Infant Fecal Microbiome (Taxa) at 1-2m
infant_taxa_12	1	Unknown_Collinsella	1-2 months	-0.058722	0.146501	Higher in Case	0.00860283	Infant Fecal Microbiome (Taxa) at 1-2m
infant_taxa_12	1	Unknown_Collinsella.1	1-2 months	-0.058722	0.146501	Higher in Case	0.00860283	Infant Fecal Microbiome (Taxa) at 1-2m
infant_taxa_12	1	Unknown_Collinsella.2	1-2 months	-0.058722	0.146501	Higher in Case	0.00860283	Infant Fecal Microbiome (Taxa) at 1-2m
infant_taxa_12	1	Unknown_Collinsella.3	1-2 months	-0.058722	0.146501	Higher in Case	0.00860283	Infant Fecal Microbiome (Taxa) at 1-2m
infant_taxa_12	1	Unknown_Collinsella.4	1-2 months	-0.058722	0.146501	Higher in Case	0.00860283	Infant Fecal Microbiome (Taxa) at 1-2m
infant_taxa_12	1	Unknown_Collinsella.5	1-2 months	-0.058722	0.146501	Higher in Case	0.00860283	Infant Fecal Microbiome (Taxa) at 1-2m
infant_taxa_12	1	Unknown_Collinsella.6	1-2 months	-0.058722	0.146501	Higher in Case	0.00860283	Infant Fecal Microbiome (Taxa) at 1-2m
infant_taxa_12	1	Unknown_Collinsella.7	1-2 months	-0.058722	0.146501	Higher in Case	0.00860283	Infant Fecal Microbiome (Taxa) at 1-2m
infant_taxa_12	1	Unknown_Collinsella.8	1-2 months	-0.058722	0.146501	Higher in Case	0.00860283	Infant Fecal Microbiome (Taxa) at 1-2m
infant_taxa_12	1	Unknown_Collinsella.9	1-2 months	-0.058722	0.146501	Higher in Case	0.00860283	Infant Fecal Microbiome (Taxa) at 1-2m
infant_taxa_12	1	Enorma.sp900538305	1-2 months	-0.058722	0.146501	Higher in Case	0.00860283	Infant Fecal Microbiome (Taxa) at 1-2m
infant_taxa_12	1	Unknown_Enorma	1-2 months	-0.058722	0.146501	Higher in Case	0.00860283	Infant Fecal Microbiome (Taxa) at 1-2m
infant_taxa_12	1	CAG.1427.sp000434775	1-2 months	-0.058722	0.146501	Higher in Case	0.00860283	Infant Fecal Microbiome (Taxa) at 1-2m
infant_taxa_12	1	CAG.1427.sp000435475	1-2 months	-0.058722	0.146501	Higher in Case	0.00860283	Infant Fecal Microbiome (Taxa) at 1-2m
infant_taxa_12	1	CAG.1427.sp000435675	1-2 months	-0.058722	0.146501	Higher in Case	0.00860283	Infant Fecal Microbiome (Taxa) at 1-2m
infant_taxa_12	1	CAG.1427.sp000436075	1-2 months	-0.058722	0.146501	Higher in Case	0.00860283	Infant Fecal Microbiome (Taxa) at 1-2m
infant_taxa_12	1	CAG.1427.sp900553605	1-2 months	-0.058722	0.146501	Higher in Case	0.00860283	Infant Fecal Microbiome (Taxa) at 1-2m
infant_taxa_12	1	Unknown_CAG.1427	1-2 months	-0.058722	0.146501	Higher in Case	0.00860283	Infant Fecal Microbiome (Taxa) at 1-2m
infant_taxa_12	1	DNF00809.sp001552935	1-2 months	-0.058722	0.146501	Higher in Case	0.00860283	Infant Fecal Microbiome (Taxa) at 1-2m
infant_taxa_12	1	Gordonibacter.pamelaeae	1-2 months	-0.058722	0.146501	Higher in Case	0.00860283	Infant Fecal Microbiome (Taxa) at 1-2m
infant_taxa_12	1	Gordonibacter.pamelaeae.1	1-2 months	-0.058722	0.146501	Higher in Case	0.00860283	Infant Fecal Microbiome (Taxa) at 1-2m
infant_taxa_12	1	Phoenicibacter.congonensis	1-2 months	-0.058722	0.146501	Higher in Case	0.00860283	Infant Fecal Microbiome (Taxa) at 1-2m
infant_taxa_12	1	Senegalimassilia.sp004135645	1-2 months	-0.058722	0.146501	Higher in Case	0.00860283	Infant Fecal Microbiome (Taxa) at 1-2m
infant_taxa_12	1	Senegalimassilia.sp900550055	1-2 months	-0.058722	0.146501	Higher in Case	0.00860283	Infant Fecal Microbiome (Taxa) at 1-2m
infant_taxa_12	1	Unknown_Senegalimassilia	1-2 months	-0.058722	0.146501	Higher in Case	0.00860283	Infant Fecal Microbiome (Taxa) at 1-2m
infant_taxa_12	1	Unknown_Senegalimassilia.1	1-2 months	-0.058722	0.146501	Higher in Case	0.00860283	Infant Fecal Microbiome (Taxa) at 1-2m
infant_taxa_12	1	Unknown_Senegalimassilia.2	1-2 months	-0.058722	0.146501	Higher in Case	0.00860283	Infant Fecal Microbiome (Taxa) at 1-2m
infant_taxa_12	1	Unknown_Senegalimassilia.3	1-2 months	-0.058722	0.146501	Higher in Case	0.00860283	Infant Fecal Microbiome (Taxa) at 1-2m
infant_taxa_12	1	Slackia.exigua	1-2 months	-0.058722	0.146501	Higher in Case	0.00860283	Infant Fecal Microbiome (Taxa) at 1-2m
infant_taxa_12	1	Slackia_A.isoflavoniconvertens	1-2 months	-0.058722	0.146501	Higher in Case	0.00860283	Infant Fecal Microbiome (Taxa) at 1-2m
infant_taxa_12	1	Unknown_Slackia_A	1-2 months	-0.058722	0.146501	Higher in Case	0.00860283	Infant Fecal Microbiome (Taxa) at 1-2m
infant_taxa_12	1	Unknown_Slackia_A.1	1-2 months	-0.058722	0.146501	Higher in Case	0.00860283	Infant Fecal Microbiome (Taxa) at 1-2m
infant_taxa_12	1	Unknown_Slackia_A.2	1-2 months	-0.058722	0.146501	Higher in Case	0.00860283	Infant Fecal Microbiome (Taxa) at 1-2m
infant_taxa_12	1	UMGS1293.sp900550385	1-2 months	-0.058722	0.146501	Higher in Case	0.00860283	Infant Fecal Microbiome (Taxa) at 1-2m
infant_taxa_12	1	Unknown_UMGS1293	1-2 months	-0.058722	0.146501	Higher in Case	0.00860283	Infant Fecal Microbiome (Taxa) at 1-2m
infant_taxa_12	1	Unknown_UMGS1502	1-2 months	-0.058722	0.146501	Higher in Case	0.00860283	Infant Fecal Microbiome (Taxa) at 1-2m
infant_taxa_12	1	Unknown_UMGS1502.1	1-2 months	-0.058722	0.146501	Higher in Case	0.00860283	Infant Fecal Microbiome (Taxa) at 1-2m
infant_taxa_12	1	UMGS1773.sp900554945	1-2 months	-0.058722	0.146501	Higher in Case	0.00860283	Infant Fecal Microbiome (Taxa) at 1-2m
infant_taxa_12	1	Unknown_UMGS1773	1-2 months	-0.058722	0.146501	Higher in Case	0.00860283	Infant Fecal Microbiome (Taxa) at 1-2m
infant_taxa_12	1	Unknown_Eggerthellaceae	1-2 months	-0.058722	0.146501	Higher in Case	0.00860283	Infant Fecal Microbiome (Taxa) at 1-2m
infant_taxa_12	1	Unknown_QAMH01	1-2 months	-0.058722	0.146501	Higher in Case	0.00860283	Infant Fecal Microbiome (Taxa) at 1-2m
infant_taxa_12	1	Unknown_QAMH01.1	1-2 months	-0.058722	0.146501	Higher in Case	0.00860283	Infant Fecal Microbiome (Taxa) at 1-2m
infant_taxa_12	1	Unknown_W2P13.069	1-2 months	-0.058722	0.146501	Higher in Case	0.00860283	Infant Fecal Microbiome (Taxa) at 1-2m
infant_taxa_12	1	UMGS124.sp900539345	1-2 months	-0.058722	0.146501	Higher in Case	0.00860283	Infant Fecal Microbiome (Taxa) at 1-2m
infant_taxa_12	1	Unknown_UMGS124	1-2 months	-0.058722	0.146501	Higher in Case	0.00860283	Infant Fecal Microbiome (Taxa) at 1-2m
infant_taxa_12	1	Bacteroides.bouchesdurhonensis	1-2 months	-0.058722	0.146501	Higher in Case	0.00860283	Infant Fecal Microbiome (Taxa) at 1-2m
infant_taxa_12	1	Bacteroides.cellulosilyticus	1-2 months	-0.058722	0.146501	Higher in Case	0.00860283	Infant Fecal Microbiome (Taxa) at 1-2m
infant_taxa_12	1	Bacteroides.clarus	1-2 months	-0.058722	0.146501	Higher in Case	0.00860283	Infant Fecal Microbiome (Taxa) at 1-2m
infant_taxa_12	1	Bacteroides.eggerthii	1-2 months	-0.058722	0.146501	Higher in Case	0.00860283	Infant Fecal Microbiome (Taxa) at 1-2m
infant_taxa_12	1	Bacteroides.finegoldii	1-2 months	-0.058722	0.146501	Higher in Case	0.00860283	Infant Fecal Microbiome (Taxa) at 1-2m
infant_taxa_12	1	Bacteroides.intestinalis	1-2 months	-0.058722	0.146501	Higher in Case	0.00860283	Infant Fecal Microbiome (Taxa) at 1-2m
infant_taxa_12	1	Bacteroides.nordii	1-2 months	-0.058722	0.146501	Higher in Case	0.00860283	Infant Fecal Microbiome (Taxa) at 1-2m
infant_taxa_12	1	Bacteroides.salyersiae	1-2 months	-0.058722	0.146501	Higher in Case	0.00860283	Infant Fecal Microbiome (Taxa) at 1-2m
infant_taxa_12	1	Bacteroides.stercoris	1-2 months	-0.058722	0.146501	Higher in Case	0.00860283	Infant Fecal Microbiome (Taxa) at 1-2m
infant_taxa_12	1	Unknown_Bacteroides	1-2 months	-0.058722	0.146501	Higher in Case	0.00860283	Infant Fecal Microbiome (Taxa) at 1-2m
infant_taxa_12	1	Unknown_Bacteroides.1	1-2 months	-0.058722	0.146501	Higher in Case	0.00860283	Infant Fecal Microbiome (Taxa) at 1-2m
infant_taxa_12	1	Unknown_Bacteroides.2	1-2 months	-0.058722	0.146501	Higher in Case	0.00860283	Infant Fecal Microbiome (Taxa) at 1-2m
infant_taxa_12	1	Unknown_CAG.462	1-2 months	-0.058722	0.146501	Higher in Case	0.00860283	Infant Fecal Microbiome (Taxa) at 1-2m
infant_taxa_12	1	Unknown_OM05.12	1-2 months	-0.058722	0.146501	Higher in Case	0.00860283	Infant Fecal Microbiome (Taxa) at 1-2m
infant_taxa_12	1	Paraprevotella.clara	1-2 months	-0.058722	0.146501	Higher in Case	0.00860283	Infant Fecal Microbiome (Taxa) at 1-2m
infant_taxa_12	1	Unknown_Paraprevotella	1-2 months	-0.058722	0.146501	Higher in Case	0.00860283	Infant Fecal Microbiome (Taxa) at 1-2m
infant_taxa_12	1	Phocaeicola.coprocola	1-2 months	-0.058722	0.146501	Higher in Case	0.00860283	Infant Fecal Microbiome (Taxa) at 1-2m
infant_taxa_12	1	Phocaeicola.massiliensis	1-2 months	-0.058722	0.146501	Higher in Case	0.00860283	Infant Fecal Microbiome (Taxa) at 1-2m
infant_taxa_12	1	Phocaeicola.plebeius_A	1-2 months	-0.058722	0.146501	Higher in Case	0.00860283	Infant Fecal Microbiome (Taxa) at 1-2m
infant_taxa_12	1	Phocaeicola.sartorii	1-2 months	-0.058722	0.146501	Higher in Case	0.00860283	Infant Fecal Microbiome (Taxa) at 1-2m
infant_taxa_12	1	Phocaeicola.sp002493165	1-2 months	-0.058722	0.146501	Higher in Case	0.00860283	Infant Fecal Microbiome (Taxa) at 1-2m
infant_taxa_12	1	Prevotella.amnii	1-2 months	-0.058722	0.146501	Higher in Case	0.00860283	Infant Fecal Microbiome (Taxa) at 1-2m
infant_taxa_12	1	Prevotella.buccalis	1-2 months	-0.058722	0.146501	Higher in Case	0.00860283	Infant Fecal Microbiome (Taxa) at 1-2m
infant_taxa_12	1	Prevotella.colorans	1-2 months	-0.058722	0.146501	Higher in Case	0.00860283	Infant Fecal Microbiome (Taxa) at 1-2m
infant_taxa_12	1	Prevotella.corporis	1-2 months	-0.058722	0.146501	Higher in Case	0.00860283	Infant Fecal Microbiome (Taxa) at 1-2m
infant_taxa_12	1	Prevotella.disiens	1-2 months	-0.058722	0.146501	Higher in Case	0.00860283	Infant Fecal Microbiome (Taxa) at 1-2m
infant_taxa_12	1	Prevotella.sp000434515	1-2 months	-0.058722	0.146501	Higher in Case	0.00860283	Infant Fecal Microbiome (Taxa) at 1-2m
infant_taxa_12	1	Prevotella.sp000434975	1-2 months	-0.058722	0.146501	Higher in Case	0.00860283	Infant Fecal Microbiome (Taxa) at 1-2m
infant_taxa_12	1	Prevotella.sp000436915	1-2 months	-0.058722	0.146501	Higher in Case	0.00860283	Infant Fecal Microbiome (Taxa) at 1-2m
infant_taxa_12	1	Prevotella.sp000834015	1-2 months	-0.058722	0.146501	Higher in Case	0.00860283	Infant Fecal Microbiome (Taxa) at 1-2m
infant_taxa_12	1	Prevotella.sp002251295	1-2 months	-0.058722	0.146501	Higher in Case	0.00860283	Infant Fecal Microbiome (Taxa) at 1-2m
infant_taxa_12	1	Prevotella.sp002251385	1-2 months	-0.058722	0.146501	Higher in Case	0.00860283	Infant Fecal Microbiome (Taxa) at 1-2m
infant_taxa_12	1	Prevotella.sp002299635	1-2 months	-0.058722	0.146501	Higher in Case	0.00860283	Infant Fecal Microbiome (Taxa) at 1-2m
infant_taxa_12	1	Prevotella.sp002300055	1-2 months	-0.058722	0.146501	Higher in Case	0.00860283	Infant Fecal Microbiome (Taxa) at 1-2m
infant_taxa_12	1	Prevotella.sp003447235	1-2 months	-0.058722	0.146501	Higher in Case	0.00860283	Infant Fecal Microbiome (Taxa) at 1-2m
infant_taxa_12	1	Prevotella.sp900313215	1-2 months	-0.058722	0.146501	Higher in Case	0.00860283	Infant Fecal Microbiome (Taxa) at 1-2m
infant_taxa_12	1	Prevotella.sp900540415	1-2 months	-0.058722	0.146501	Higher in Case	0.00860283	Infant Fecal Microbiome (Taxa) at 1-2m
infant_taxa_12	1	Prevotella.sp900543975	1-2 months	-0.058722	0.146501	Higher in Case	0.00860283	Infant Fecal Microbiome (Taxa) at 1-2m
infant_taxa_12	1	Prevotella.sp900546535	1-2 months	-0.058722	0.146501	Higher in Case	0.00860283	Infant Fecal Microbiome (Taxa) at 1-2m
infant_taxa_12	1	Prevotella.sp900548535	1-2 months	-0.058722	0.146501	Higher in Case	0.00860283	Infant Fecal Microbiome (Taxa) at 1-2m
infant_taxa_12	1	Prevotella.sp900548585	1-2 months	-0.058722	0.146501	Higher in Case	0.00860283	Infant Fecal Microbiome (Taxa) at 1-2m
infant_taxa_12	1	Prevotella.sp900548745	1-2 months	-0.058722	0.146501	Higher in Case	0.00860283	Infant Fecal Microbiome (Taxa) at 1-2m
infant_taxa_12	1	Prevotella.sp900550035	1-2 months	-0.058722	0.146501	Higher in Case	0.00860283	Infant Fecal Microbiome (Taxa) at 1-2m
infant_taxa_12	1	Prevotella.sp900552515	1-2 months	-0.058722	0.146501	Higher in Case	0.00860283	Infant Fecal Microbiome (Taxa) at 1-2m
infant_taxa_12	1	Prevotella.sp900552675	1-2 months	-0.058722	0.146501	Higher in Case	0.00860283	Infant Fecal Microbiome (Taxa) at 1-2m
infant_taxa_12	1	Prevotella.sp900552965	1-2 months	-0.058722	0.146501	Higher in Case	0.00860283	Infant Fecal Microbiome (Taxa) at 1-2m
infant_taxa_12	1	Prevotella.sp900553155	1-2 months	-0.058722	0.146501	Higher in Case	0.00860283	Infant Fecal Microbiome (Taxa) at 1-2m
infant_taxa_12	1	Prevotella.sp900553595	1-2 months	-0.058722	0.146501	Higher in Case	0.00860283	Infant Fecal Microbiome (Taxa) at 1-2m
infant_taxa_12	1	Prevotella.sp900556395	1-2 months	-0.058722	0.146501	Higher in Case	0.00860283	Infant Fecal Microbiome (Taxa) at 1-2m
infant_taxa_12	1	Prevotella.sp900556795	1-2 months	-0.058722	0.146501	Higher in Case	0.00860283	Infant Fecal Microbiome (Taxa) at 1-2m
infant_taxa_12	1	Prevotella.sp900556825	1-2 months	-0.058722	0.146501	Higher in Case	0.00860283	Infant Fecal Microbiome (Taxa) at 1-2m
infant_taxa_12	1	Prevotella.sp900557405	1-2 months	-0.058722	0.146501	Higher in Case	0.00860283	Infant Fecal Microbiome (Taxa) at 1-2m
infant_taxa_12	1	Prevotella.stercorea	1-2 months	-0.058722	0.146501	Higher in Case	0.00860283	Infant Fecal Microbiome (Taxa) at 1-2m
infant_taxa_12	1	Prevotella.timonensis	1-2 months	-0.058722	0.146501	Higher in Case	0.00860283	Infant Fecal Microbiome (Taxa) at 1-2m
infant_taxa_12	1	Unknown_Prevotella	1-2 months	-0.058722	0.146501	Higher in Case	0.00860283	Infant Fecal Microbiome (Taxa) at 1-2m
infant_taxa_12	1	Unknown_Prevotella.1	1-2 months	-0.058722	0.146501	Higher in Case	0.00860283	Infant Fecal Microbiome (Taxa) at 1-2m
infant_taxa_12	1	Unknown_Prevotella.2	1-2 months	-0.058722	0.146501	Higher in Case	0.00860283	Infant Fecal Microbiome (Taxa) at 1-2m
infant_taxa_12	1	Unknown_Prevotella.3	1-2 months	-0.058722	0.146501	Higher in Case	0.00860283	Infant Fecal Microbiome (Taxa) at 1-2m
infant_taxa_12	1	Unknown_Prevotella.4	1-2 months	-0.058722	0.146501	Higher in Case	0.00860283	Infant Fecal Microbiome (Taxa) at 1-2m
infant_taxa_12	1	Unknown_Prevotella.5	1-2 months	-0.058722	0.146501	Higher in Case	0.00860283	Infant Fecal Microbiome (Taxa) at 1-2m
infant_taxa_12	1	Unknown_Prevotella.6	1-2 months	-0.058722	0.146501	Higher in Case	0.00860283	Infant Fecal Microbiome (Taxa) at 1-2m
infant_taxa_12	1	Unknown_Prevotella.7	1-2 months	-0.058722	0.146501	Higher in Case	0.00860283	Infant Fecal Microbiome (Taxa) at 1-2m
infant_taxa_12	1	Unknown_Prevotella.8	1-2 months	-0.058722	0.146501	Higher in Case	0.00860283	Infant Fecal Microbiome (Taxa) at 1-2m
infant_taxa_12	1	Unknown_Prevotella.9	1-2 months	-0.058722	0.146501	Higher in Case	0.00860283	Infant Fecal Microbiome (Taxa) at 1-2m
infant_taxa_12	1	Unknown_Prevotella.10	1-2 months	-0.058722	0.146501	Higher in Case	0.00860283	Infant Fecal Microbiome (Taxa) at 1-2m
infant_taxa_12	1	Unknown_Prevotella.11	1-2 months	-0.058722	0.146501	Higher in Case	0.00860283	Infant Fecal Microbiome (Taxa) at 1-2m
infant_taxa_12	1	Unknown_Prevotella.12	1-2 months	-0.058722	0.146501	Higher in Case	0.00860283	Infant Fecal Microbiome (Taxa) at 1-2m
infant_taxa_12	1	Prevotellamassilia.sp900539625	1-2 months	-0.058722	0.146501	Higher in Case	0.00860283	Infant Fecal Microbiome (Taxa) at 1-2m
infant_taxa_12	1	Prevotellamassilia.sp900540885	1-2 months	-0.058722	0.146501	Higher in Case	0.00860283	Infant Fecal Microbiome (Taxa) at 1-2m
infant_taxa_12	1	Prevotellamassilia.sp900541575	1-2 months	-0.058722	0.146501	Higher in Case	0.00860283	Infant Fecal Microbiome (Taxa) at 1-2m
infant_taxa_12	1	Prevotellamassilia.sp900542795	1-2 months	-0.058722	0.146501	Higher in Case	0.00860283	Infant Fecal Microbiome (Taxa) at 1-2m
infant_taxa_12	1	Prevotellamassilia.sp900543155	1-2 months	-0.058722	0.146501	Higher in Case	0.00860283	Infant Fecal Microbiome (Taxa) at 1-2m
infant_taxa_12	1	Prevotellamassilia.sp900546605	1-2 months	-0.058722	0.146501	Higher in Case	0.00860283	Infant Fecal Microbiome (Taxa) at 1-2m
infant_taxa_12	1	Prevotellamassilia.timonensis	1-2 months	-0.058722	0.146501	Higher in Case	0.00860283	Infant Fecal Microbiome (Taxa) at 1-2m
infant_taxa_12	1	Unknown_Prevotellamassilia	1-2 months	-0.058722	0.146501	Higher in Case	0.00860283	Infant Fecal Microbiome (Taxa) at 1-2m
infant_taxa_12	1	Unknown_Prevotellamassilia.1	1-2 months	-0.058722	0.146501	Higher in Case	0.00860283	Infant Fecal Microbiome (Taxa) at 1-2m
infant_taxa_12	1	Unknown_UBA4334	1-2 months	-0.058722	0.146501	Higher in Case	0.00860283	Infant Fecal Microbiome (Taxa) at 1-2m
infant_taxa_12	1	UBA4372.sp900543815	1-2 months	-0.058722	0.146501	Higher in Case	0.00860283	Infant Fecal Microbiome (Taxa) at 1-2m
infant_taxa_12	1	UBA6382.sp900557555	1-2 months	-0.058722	0.146501	Higher in Case	0.00860283	Infant Fecal Microbiome (Taxa) at 1-2m
infant_taxa_12	1	UBA6398.sp003150315	1-2 months	-0.058722	0.146501	Higher in Case	0.00860283	Infant Fecal Microbiome (Taxa) at 1-2m
infant_taxa_12	1	UBA6398.sp900550635	1-2 months	-0.058722	0.146501	Higher in Case	0.00860283	Infant Fecal Microbiome (Taxa) at 1-2m
infant_taxa_12	1	Barnesiella.intestinihominis	1-2 months	-0.058722	0.146501	Higher in Case	0.00860283	Infant Fecal Microbiome (Taxa) at 1-2m
infant_taxa_12	1	Barnesiella.sp900542255	1-2 months	-0.058722	0.146501	Higher in Case	0.00860283	Infant Fecal Microbiome (Taxa) at 1-2m
infant_taxa_12	1	Coprobacter.fastidiosus	1-2 months	-0.058722	0.146501	Higher in Case	0.00860283	Infant Fecal Microbiome (Taxa) at 1-2m
infant_taxa_12	1	Coprobacter.secundus	1-2 months	-0.058722	0.146501	Higher in Case	0.00860283	Infant Fecal Microbiome (Taxa) at 1-2m
infant_taxa_12	1	Dysgonomonas.mossii	1-2 months	-0.058722	0.146501	Higher in Case	0.00860283	Infant Fecal Microbiome (Taxa) at 1-2m
infant_taxa_12	1	Dysgonomonas.sp900079735	1-2 months	-0.058722	0.146501	Higher in Case	0.00860283	Infant Fecal Microbiome (Taxa) at 1-2m
infant_taxa_12	1	F082.sp002633315	1-2 months	-0.058722	0.146501	Higher in Case	0.00860283	Infant Fecal Microbiome (Taxa) at 1-2m
infant_taxa_12	1	Butyricimonas.faecalis	1-2 months	-0.058722	0.146501	Higher in Case	0.00860283	Infant Fecal Microbiome (Taxa) at 1-2m
infant_taxa_12	1	Butyricimonas.virosa	1-2 months	-0.058722	0.146501	Higher in Case	0.00860283	Infant Fecal Microbiome (Taxa) at 1-2m
infant_taxa_12	1	Unknown_Butyricimonas	1-2 months	-0.058722	0.146501	Higher in Case	0.00860283	Infant Fecal Microbiome (Taxa) at 1-2m
infant_taxa_12	1	Gabonibacter.massiliensis	1-2 months	-0.058722	0.146501	Higher in Case	0.00860283	Infant Fecal Microbiome (Taxa) at 1-2m
infant_taxa_12	1	Odoribacter.massiliensis	1-2 months	-0.058722	0.146501	Higher in Case	0.00860283	Infant Fecal Microbiome (Taxa) at 1-2m
infant_taxa_12	1	Odoribacter.sp900544025	1-2 months	-0.058722	0.146501	Higher in Case	0.00860283	Infant Fecal Microbiome (Taxa) at 1-2m
infant_taxa_12	1	Odoribacter.splanchnicus	1-2 months	-0.058722	0.146501	Higher in Case	0.00860283	Infant Fecal Microbiome (Taxa) at 1-2m
infant_taxa_12	1	C941.sp004557565	1-2 months	-0.058722	0.146501	Higher in Case	0.00860283	Infant Fecal Microbiome (Taxa) at 1-2m
infant_taxa_12	1	C941.sp900321725	1-2 months	-0.058722	0.146501	Higher in Case	0.00860283	Infant Fecal Microbiome (Taxa) at 1-2m
infant_taxa_12	1	Unknown_C941	1-2 months	-0.058722	0.146501	Higher in Case	0.00860283	Infant Fecal Microbiome (Taxa) at 1-2m
infant_taxa_12	1	Unknown_C941.1	1-2 months	-0.058722	0.146501	Higher in Case	0.00860283	Infant Fecal Microbiome (Taxa) at 1-2m
infant_taxa_12	1	Unknown_C941.2	1-2 months	-0.058722	0.146501	Higher in Case	0.00860283	Infant Fecal Microbiome (Taxa) at 1-2m
infant_taxa_12	1	CAG.279.sp900544305	1-2 months	-0.058722	0.146501	Higher in Case	0.00860283	Infant Fecal Microbiome (Taxa) at 1-2m
infant_taxa_12	1	CAG.485.sp001701295	1-2 months	-0.058722	0.146501	Higher in Case	0.00860283	Infant Fecal Microbiome (Taxa) at 1-2m
infant_taxa_12	1	CAG.485.sp900550645	1-2 months	-0.058722	0.146501	Higher in Case	0.00860283	Infant Fecal Microbiome (Taxa) at 1-2m
infant_taxa_12	1	CAG.873.sp001701165	1-2 months	-0.058722	0.146501	Higher in Case	0.00860283	Infant Fecal Microbiome (Taxa) at 1-2m
infant_taxa_12	1	CAG.873.sp900540625	1-2 months	-0.058722	0.146501	Higher in Case	0.00860283	Infant Fecal Microbiome (Taxa) at 1-2m
infant_taxa_12	1	CAG.873.sp900555715	1-2 months	-0.058722	0.146501	Higher in Case	0.00860283	Infant Fecal Microbiome (Taxa) at 1-2m
infant_taxa_12	1	Unknown_CAG.873	1-2 months	-0.058722	0.146501	Higher in Case	0.00860283	Infant Fecal Microbiome (Taxa) at 1-2m
infant_taxa_12	1	Muribaculum.sp002492595	1-2 months	-0.058722	0.146501	Higher in Case	0.00860283	Infant Fecal Microbiome (Taxa) at 1-2m
infant_taxa_12	1	UBA7173.sp900545955	1-2 months	-0.058722	0.146501	Higher in Case	0.00860283	Infant Fecal Microbiome (Taxa) at 1-2m
infant_taxa_12	1	Unknown_Muribaculaceae	1-2 months	-0.058722	0.146501	Higher in Case	0.00860283	Infant Fecal Microbiome (Taxa) at 1-2m
infant_taxa_12	1	UBA3388.sp004551865	1-2 months	-0.058722	0.146501	Higher in Case	0.00860283	Infant Fecal Microbiome (Taxa) at 1-2m
infant_taxa_12	1	UBA3388.sp900545215	1-2 months	-0.058722	0.146501	Higher in Case	0.00860283	Infant Fecal Microbiome (Taxa) at 1-2m
infant_taxa_12	1	RF16.sp900556095	1-2 months	-0.058722	0.146501	Higher in Case	0.00860283	Infant Fecal Microbiome (Taxa) at 1-2m
infant_taxa_12	1	Unknown_RF16	1-2 months	-0.058722	0.146501	Higher in Case	0.00860283	Infant Fecal Microbiome (Taxa) at 1-2m
infant_taxa_12	1	Unknown_RF16.1	1-2 months	-0.058722	0.146501	Higher in Case	0.00860283	Infant Fecal Microbiome (Taxa) at 1-2m
infant_taxa_12	1	Porphyromonas.asaccharolytica	1-2 months	-0.058722	0.146501	Higher in Case	0.00860283	Infant Fecal Microbiome (Taxa) at 1-2m
infant_taxa_12	1	Porphyromonas.endodontalis	1-2 months	-0.058722	0.146501	Higher in Case	0.00860283	Infant Fecal Microbiome (Taxa) at 1-2m
infant_taxa_12	1	Porphyromonas.sp900538385	1-2 months	-0.058722	0.146501	Higher in Case	0.00860283	Infant Fecal Microbiome (Taxa) at 1-2m
infant_taxa_12	1	Porphyromonas.sp900539155	1-2 months	-0.058722	0.146501	Higher in Case	0.00860283	Infant Fecal Microbiome (Taxa) at 1-2m
infant_taxa_12	1	Porphyromonas.sp900548415	1-2 months	-0.058722	0.146501	Higher in Case	0.00860283	Infant Fecal Microbiome (Taxa) at 1-2m
infant_taxa_12	1	Porphyromonas.uenonis	1-2 months	-0.058722	0.146501	Higher in Case	0.00860283	Infant Fecal Microbiome (Taxa) at 1-2m
infant_taxa_12	1	Porphyromonas.uenonis_A	1-2 months	-0.058722	0.146501	Higher in Case	0.00860283	Infant Fecal Microbiome (Taxa) at 1-2m
infant_taxa_12	1	Unknown_Porphyromonas	1-2 months	-0.058722	0.146501	Higher in Case	0.00860283	Infant Fecal Microbiome (Taxa) at 1-2m
infant_taxa_12	1	Unknown_Porphyromonas.1	1-2 months	-0.058722	0.146501	Higher in Case	0.00860283	Infant Fecal Microbiome (Taxa) at 1-2m
infant_taxa_12	1	Unknown_Porphyromonas.2	1-2 months	-0.058722	0.146501	Higher in Case	0.00860283	Infant Fecal Microbiome (Taxa) at 1-2m
infant_taxa_12	1	Unknown_Porphyromonas.3	1-2 months	-0.058722	0.146501	Higher in Case	0.00860283	Infant Fecal Microbiome (Taxa) at 1-2m
infant_taxa_12	1	Porphyromonas_A.somerae	1-2 months	-0.058722	0.146501	Higher in Case	0.00860283	Infant Fecal Microbiome (Taxa) at 1-2m
infant_taxa_12	1	Porphyromonas_A.sp001808555	1-2 months	-0.058722	0.146501	Higher in Case	0.00860283	Infant Fecal Microbiome (Taxa) at 1-2m
infant_taxa_12	1	Alistipes.finegoldii	1-2 months	-0.058722	0.146501	Higher in Case	0.00860283	Infant Fecal Microbiome (Taxa) at 1-2m
infant_taxa_12	1	Alistipes.obesi	1-2 months	-0.058722	0.146501	Higher in Case	0.00860283	Infant Fecal Microbiome (Taxa) at 1-2m
infant_taxa_12	1	Alistipes.onderdonkii	1-2 months	-0.058722	0.146501	Higher in Case	0.00860283	Infant Fecal Microbiome (Taxa) at 1-2m
infant_taxa_12	1	Alistipes.putredinis	1-2 months	-0.058722	0.146501	Higher in Case	0.00860283	Infant Fecal Microbiome (Taxa) at 1-2m
infant_taxa_12	1	Alistipes.senegalensis	1-2 months	-0.058722	0.146501	Higher in Case	0.00860283	Infant Fecal Microbiome (Taxa) at 1-2m
infant_taxa_12	1	Alistipes.shahii	1-2 months	-0.058722	0.146501	Higher in Case	0.00860283	Infant Fecal Microbiome (Taxa) at 1-2m
infant_taxa_12	1	Alistipes.sp900083545	1-2 months	-0.058722	0.146501	Higher in Case	0.00860283	Infant Fecal Microbiome (Taxa) at 1-2m
infant_taxa_12	1	Alistipes.sp900541585	1-2 months	-0.058722	0.146501	Higher in Case	0.00860283	Infant Fecal Microbiome (Taxa) at 1-2m
infant_taxa_12	1	Alistipes.sp900546065	1-2 months	-0.058722	0.146501	Higher in Case	0.00860283	Infant Fecal Microbiome (Taxa) at 1-2m
infant_taxa_12	1	Alistipes.sp900549305	1-2 months	-0.058722	0.146501	Higher in Case	0.00860283	Infant Fecal Microbiome (Taxa) at 1-2m
infant_taxa_12	1	Unknown_Alistipes	1-2 months	-0.058722	0.146501	Higher in Case	0.00860283	Infant Fecal Microbiome (Taxa) at 1-2m
infant_taxa_12	1	Alistipes_A.ihumii	1-2 months	-0.058722	0.146501	Higher in Case	0.00860283	Infant Fecal Microbiome (Taxa) at 1-2m
infant_taxa_12	1	Alistipes_A.sp900539755	1-2 months	-0.058722	0.146501	Higher in Case	0.00860283	Infant Fecal Microbiome (Taxa) at 1-2m
infant_taxa_12	1	Tidjanibacter.inops	1-2 months	-0.058722	0.146501	Higher in Case	0.00860283	Infant Fecal Microbiome (Taxa) at 1-2m
infant_taxa_12	1	Unknown_Rikenellaceae	1-2 months	-0.058722	0.146501	Higher in Case	0.00860283	Infant Fecal Microbiome (Taxa) at 1-2m
infant_taxa_12	1	Unknown_Rikenellaceae.1	1-2 months	-0.058722	0.146501	Higher in Case	0.00860283	Infant Fecal Microbiome (Taxa) at 1-2m
infant_taxa_12	1	Parabacteroides.bouchesdurhonensis	1-2 months	-0.058722	0.146501	Higher in Case	0.00860283	Infant Fecal Microbiome (Taxa) at 1-2m
infant_taxa_12	1	Parabacteroides.chinchillae	1-2 months	-0.058722	0.146501	Higher in Case	0.00860283	Infant Fecal Microbiome (Taxa) at 1-2m
infant_taxa_12	1	Parabacteroides.gordonii	1-2 months	-0.058722	0.146501	Higher in Case	0.00860283	Infant Fecal Microbiome (Taxa) at 1-2m
infant_taxa_12	1	Parabacteroides.sp000436495	1-2 months	-0.058722	0.146501	Higher in Case	0.00860283	Infant Fecal Microbiome (Taxa) at 1-2m
infant_taxa_12	1	Parabacteroides.sp900155425	1-2 months	-0.058722	0.146501	Higher in Case	0.00860283	Infant Fecal Microbiome (Taxa) at 1-2m
infant_taxa_12	1	Parabacteroides.sp900541965	1-2 months	-0.058722	0.146501	Higher in Case	0.00860283	Infant Fecal Microbiome (Taxa) at 1-2m
infant_taxa_12	1	Parabacteroides.sp900549585	1-2 months	-0.058722	0.146501	Higher in Case	0.00860283	Infant Fecal Microbiome (Taxa) at 1-2m
infant_taxa_12	1	Unknown_Parabacteroides	1-2 months	-0.058722	0.146501	Higher in Case	0.00860283	Infant Fecal Microbiome (Taxa) at 1-2m
infant_taxa_12	1	Unknown_Parabacteroides.1	1-2 months	-0.058722	0.146501	Higher in Case	0.00860283	Infant Fecal Microbiome (Taxa) at 1-2m
infant_taxa_12	1	Unknown_Parabacteroides.2	1-2 months	-0.058722	0.146501	Higher in Case	0.00860283	Infant Fecal Microbiome (Taxa) at 1-2m
infant_taxa_12	1	UBA11471.sp000434215	1-2 months	-0.058722	0.146501	Higher in Case	0.00860283	Infant Fecal Microbiome (Taxa) at 1-2m
infant_taxa_12	1	UBA11471.sp900542765	1-2 months	-0.058722	0.146501	Higher in Case	0.00860283	Infant Fecal Microbiome (Taxa) at 1-2m
infant_taxa_12	1	RC9.sp000431015	1-2 months	-0.058722	0.146501	Higher in Case	0.00860283	Infant Fecal Microbiome (Taxa) at 1-2m
infant_taxa_12	1	RC9.sp000432515	1-2 months	-0.058722	0.146501	Higher in Case	0.00860283	Infant Fecal Microbiome (Taxa) at 1-2m
infant_taxa_12	1	RC9.sp000432655	1-2 months	-0.058722	0.146501	Higher in Case	0.00860283	Infant Fecal Microbiome (Taxa) at 1-2m
infant_taxa_12	1	RC9.sp000433355	1-2 months	-0.058722	0.146501	Higher in Case	0.00860283	Infant Fecal Microbiome (Taxa) at 1-2m
infant_taxa_12	1	RC9.sp000434935	1-2 months	-0.058722	0.146501	Higher in Case	0.00860283	Infant Fecal Microbiome (Taxa) at 1-2m
infant_taxa_12	1	RC9.sp000435075	1-2 months	-0.058722	0.146501	Higher in Case	0.00860283	Infant Fecal Microbiome (Taxa) at 1-2m
infant_taxa_12	1	RC9.sp900541925	1-2 months	-0.058722	0.146501	Higher in Case	0.00860283	Infant Fecal Microbiome (Taxa) at 1-2m
infant_taxa_12	1	RC9.sp900544195	1-2 months	-0.058722	0.146501	Higher in Case	0.00860283	Infant Fecal Microbiome (Taxa) at 1-2m
infant_taxa_12	1	RC9.sp900545245	1-2 months	-0.058722	0.146501	Higher in Case	0.00860283	Infant Fecal Microbiome (Taxa) at 1-2m
infant_taxa_12	1	RC9.sp900546445	1-2 months	-0.058722	0.146501	Higher in Case	0.00860283	Infant Fecal Microbiome (Taxa) at 1-2m
infant_taxa_12	1	RC9.sp900546925	1-2 months	-0.058722	0.146501	Higher in Case	0.00860283	Infant Fecal Microbiome (Taxa) at 1-2m
infant_taxa_12	1	Unknown_RC9	1-2 months	-0.058722	0.146501	Higher in Case	0.00860283	Infant Fecal Microbiome (Taxa) at 1-2m
infant_taxa_12	1	Unknown_RC9.1	1-2 months	-0.058722	0.146501	Higher in Case	0.00860283	Infant Fecal Microbiome (Taxa) at 1-2m
infant_taxa_12	1	UBA1232.sp900544815	1-2 months	-0.058722	0.146501	Higher in Case	0.00860283	Infant Fecal Microbiome (Taxa) at 1-2m
infant_taxa_12	1	Unknown_Bacteroidales	1-2 months	-0.058722	0.146501	Higher in Case	0.00860283	Infant Fecal Microbiome (Taxa) at 1-2m
infant_taxa_12	1	UBA1820.sp002314265	1-2 months	-0.058722	0.146501	Higher in Case	0.00860283	Infant Fecal Microbiome (Taxa) at 1-2m
infant_taxa_12	1	UBA1820.sp003150615	1-2 months	-0.058722	0.146501	Higher in Case	0.00860283	Infant Fecal Microbiome (Taxa) at 1-2m
infant_taxa_12	1	Unknown_UBA1820	1-2 months	-0.058722	0.146501	Higher in Case	0.00860283	Infant Fecal Microbiome (Taxa) at 1-2m
infant_taxa_12	1	Campylobacter_B.hominis	1-2 months	-0.058722	0.146501	Higher in Case	0.00860283	Infant Fecal Microbiome (Taxa) at 1-2m
infant_taxa_12	1	Campylobacter_D.coli	1-2 months	-0.058722	0.146501	Higher in Case	0.00860283	Infant Fecal Microbiome (Taxa) at 1-2m
infant_taxa_12	1	Campylobacter_D.sp900539255	1-2 months	-0.058722	0.146501	Higher in Case	0.00860283	Infant Fecal Microbiome (Taxa) at 1-2m
infant_taxa_12	1	Unknown_Campylobacter_D	1-2 months	-0.058722	0.146501	Higher in Case	0.00860283	Infant Fecal Microbiome (Taxa) at 1-2m
infant_taxa_12	1	Helicobacter_C.cinaedi	1-2 months	-0.058722	0.146501	Higher in Case	0.00860283	Infant Fecal Microbiome (Taxa) at 1-2m
infant_taxa_12	1	Helicobacter_C.magdeburgensis	1-2 months	-0.058722	0.146501	Higher in Case	0.00860283	Infant Fecal Microbiome (Taxa) at 1-2m
infant_taxa_12	1	Helicobacter_D.pullorum	1-2 months	-0.058722	0.146501	Higher in Case	0.00860283	Infant Fecal Microbiome (Taxa) at 1-2m
infant_taxa_12	1	Unknown_Helicobacteraceae	1-2 months	-0.058722	0.146501	Higher in Case	0.00860283	Infant Fecal Microbiome (Taxa) at 1-2m
infant_taxa_12	1	CAG.196.sp002102975	1-2 months	-0.058722	0.146501	Higher in Case	0.00860283	Infant Fecal Microbiome (Taxa) at 1-2m
infant_taxa_12	1	CAG.196.sp900549855	1-2 months	-0.058722	0.146501	Higher in Case	0.00860283	Infant Fecal Microbiome (Taxa) at 1-2m
infant_taxa_12	1	CAG.196.sp900553895	1-2 months	-0.058722	0.146501	Higher in Case	0.00860283	Infant Fecal Microbiome (Taxa) at 1-2m
infant_taxa_12	1	Unknown_CAG.196	1-2 months	-0.058722	0.146501	Higher in Case	0.00860283	Infant Fecal Microbiome (Taxa) at 1-2m
infant_taxa_12	1	Unknown_CAG.196.1	1-2 months	-0.058722	0.146501	Higher in Case	0.00860283	Infant Fecal Microbiome (Taxa) at 1-2m
infant_taxa_12	1	Unknown_CAG.196.2	1-2 months	-0.058722	0.146501	Higher in Case	0.00860283	Infant Fecal Microbiome (Taxa) at 1-2m
infant_taxa_12	1	Unknown_CAG.196.3	1-2 months	-0.058722	0.146501	Higher in Case	0.00860283	Infant Fecal Microbiome (Taxa) at 1-2m
infant_taxa_12	1	Unknown_CAG.196.4	1-2 months	-0.058722	0.146501	Higher in Case	0.00860283	Infant Fecal Microbiome (Taxa) at 1-2m
infant_taxa_12	1	Unknown_CAG.196.5	1-2 months	-0.058722	0.146501	Higher in Case	0.00860283	Infant Fecal Microbiome (Taxa) at 1-2m
infant_taxa_12	1	Unknown_CAG.196.6	1-2 months	-0.058722	0.146501	Higher in Case	0.00860283	Infant Fecal Microbiome (Taxa) at 1-2m
infant_taxa_12	1	Unknown_CAG.196.7	1-2 months	-0.058722	0.146501	Higher in Case	0.00860283	Infant Fecal Microbiome (Taxa) at 1-2m
infant_taxa_12	1	Unknown_CAG.196.8	1-2 months	-0.058722	0.146501	Higher in Case	0.00860283	Infant Fecal Microbiome (Taxa) at 1-2m
infant_taxa_12	1	Unknown_CAG.196.9	1-2 months	-0.058722	0.146501	Higher in Case	0.00860283	Infant Fecal Microbiome (Taxa) at 1-2m
infant_taxa_12	1	Unknown_CAG.196.10	1-2 months	-0.058722	0.146501	Higher in Case	0.00860283	Infant Fecal Microbiome (Taxa) at 1-2m
infant_taxa_12	1	Unknown_CAG.196.11	1-2 months	-0.058722	0.146501	Higher in Case	0.00860283	Infant Fecal Microbiome (Taxa) at 1-2m
infant_taxa_12	1	Unknown_CAG.196.12	1-2 months	-0.058722	0.146501	Higher in Case	0.00860283	Infant Fecal Microbiome (Taxa) at 1-2m
infant_taxa_12	1	CAG.306.sp000980375	1-2 months	-0.058722	0.146501	Higher in Case	0.00860283	Infant Fecal Microbiome (Taxa) at 1-2m
infant_taxa_12	1	CAG.484.sp900321895	1-2 months	-0.058722	0.146501	Higher in Case	0.00860283	Infant Fecal Microbiome (Taxa) at 1-2m
infant_taxa_12	1	QAMI01.sp003150395	1-2 months	-0.058722	0.146501	Higher in Case	0.00860283	Infant Fecal Microbiome (Taxa) at 1-2m
infant_taxa_12	1	QHMH01.sp003258795	1-2 months	-0.058722	0.146501	Higher in Case	0.00860283	Infant Fecal Microbiome (Taxa) at 1-2m
infant_taxa_12	1	RUG841.sp900313795	1-2 months	-0.058722	0.146501	Higher in Case	0.00860283	Infant Fecal Microbiome (Taxa) at 1-2m
infant_taxa_12	1	Unknown_RUG841	1-2 months	-0.058722	0.146501	Higher in Case	0.00860283	Infant Fecal Microbiome (Taxa) at 1-2m
infant_taxa_12	1	Unknown_RUG841.1	1-2 months	-0.058722	0.146501	Higher in Case	0.00860283	Infant Fecal Microbiome (Taxa) at 1-2m
infant_taxa_12	1	Unknown_RUG841.2	1-2 months	-0.058722	0.146501	Higher in Case	0.00860283	Infant Fecal Microbiome (Taxa) at 1-2m
infant_taxa_12	1	UBA2883.sp002103075	1-2 months	-0.058722	0.146501	Higher in Case	0.00860283	Infant Fecal Microbiome (Taxa) at 1-2m
infant_taxa_12	1	Unknown_UBA2883	1-2 months	-0.058722	0.146501	Higher in Case	0.00860283	Infant Fecal Microbiome (Taxa) at 1-2m
infant_taxa_12	1	Unknown_UBA2883.1	1-2 months	-0.058722	0.146501	Higher in Case	0.00860283	Infant Fecal Microbiome (Taxa) at 1-2m
infant_taxa_12	1	Unknown_UBA2883.2	1-2 months	-0.058722	0.146501	Higher in Case	0.00860283	Infant Fecal Microbiome (Taxa) at 1-2m
infant_taxa_12	1	UBA6984.sp003258725	1-2 months	-0.058722	0.146501	Higher in Case	0.00860283	Infant Fecal Microbiome (Taxa) at 1-2m
infant_taxa_12	1	UBA6984.sp900550295	1-2 months	-0.058722	0.146501	Higher in Case	0.00860283	Infant Fecal Microbiome (Taxa) at 1-2m
infant_taxa_12	1	Unknown_UBA6984	1-2 months	-0.058722	0.146501	Higher in Case	0.00860283	Infant Fecal Microbiome (Taxa) at 1-2m
infant_taxa_12	1	Unknown_UBA6984.1	1-2 months	-0.058722	0.146501	Higher in Case	0.00860283	Infant Fecal Microbiome (Taxa) at 1-2m
infant_taxa_12	1	Unknown_UBA791	1-2 months	-0.058722	0.146501	Higher in Case	0.00860283	Infant Fecal Microbiome (Taxa) at 1-2m
infant_taxa_12	1	Unknown_UBA791.1	1-2 months	-0.058722	0.146501	Higher in Case	0.00860283	Infant Fecal Microbiome (Taxa) at 1-2m
maternal_gene_12	1	K03556	1-2 months	0.386888	-0.282298	Lower in Case	0.109217	Maternal Fecal Metagenome (Genes) at 1-2m
maternal_gene_12	1	K21839	1-2 months	0.330686	-0.257884	Lower in Case	0.0852785	Maternal Fecal Metagenome (Genes) at 1-2m
maternal_gene_12	1	3005008	1-2 months	0.44367	-0.176697	Lower in Case	0.0783953	Maternal Fecal Metagenome (Genes) at 1-2m
maternal_gene_12	1	K22362	1-2 months	0.250887	-0.258403	Lower in Case	0.06483	Maternal Fecal Metagenome (Genes) at 1-2m
maternal_gene_12	1	K23493	1-2 months	0.189342	-0.266229	Lower in Case	0.0504083	Maternal Fecal Metagenome (Genes) at 1-2m
maternal_gene_12	1	K15954	1-2 months	0.208582	-0.228756	Lower in Case	0.0477145	Maternal Fecal Metagenome (Genes) at 1-2m
maternal_gene_12	1	K01998	1-2 months	0.185473	-0.249112	Lower in Case	0.0462034	Maternal Fecal Metagenome (Genes) at 1-2m
maternal_gene_12	1	K05394	1-2 months	0.175367	-0.238342	Lower in Case	0.0417974	Maternal Fecal Metagenome (Genes) at 1-2m
maternal_gene_12	1	K21593	1-2 months	0.174055	-0.235561	Lower in Case	0.0410005	Maternal Fecal Metagenome (Genes) at 1-2m
maternal_gene_12	1	K02033	1-2 months	0.149027	-0.257847	Lower in Case	0.0384261	Maternal Fecal Metagenome (Genes) at 1-2m
maternal_gene_12	1	K17068	1-2 months	0.147651	-0.244649	Lower in Case	0.0361226	Maternal Fecal Metagenome (Genes) at 1-2m
maternal_gene_12	1	K20982	1-2 months	0.140499	-0.253518	Lower in Case	0.035619	Maternal Fecal Metagenome (Genes) at 1-2m
maternal_gene_12	1	K02013	1-2 months	0.155966	-0.227718	Lower in Case	0.0355162	Maternal Fecal Metagenome (Genes) at 1-2m
maternal_gene_12	1	K19629	1-2 months	0.15841	-0.217193	Lower in Case	0.0344056	Maternal Fecal Metagenome (Genes) at 1-2m
maternal_gene_12	1	K00567	1-2 months	0.127921	-0.242553	Lower in Case	0.0310276	Maternal Fecal Metagenome (Genes) at 1-2m
maternal_gene_12	1	K15753	1-2 months	0.131935	-0.21952	Lower in Case	0.0289624	Maternal Fecal Metagenome (Genes) at 1-2m
maternal_gene_12	1	K07047	1-2 months	0.125419	-0.230064	Lower in Case	0.0288545	Maternal Fecal Metagenome (Genes) at 1-2m
maternal_gene_12	1	K21320	1-2 months	0.116166	-0.228318	Lower in Case	0.0265229	Maternal Fecal Metagenome (Genes) at 1-2m
maternal_gene_12	1	K17832	1-2 months	0.103215	-0.250901	Lower in Case	0.0258968	Maternal Fecal Metagenome (Genes) at 1-2m
maternal_gene_12	1	K18536	1-2 months	0.104692	-0.247209	Lower in Case	0.0258808	Maternal Fecal Metagenome (Genes) at 1-2m
maternal_gene_12	1	K20809	1-2 months	0.112587	-0.214881	Lower in Case	0.0241929	Maternal Fecal Metagenome (Genes) at 1-2m
maternal_gene_12	1	K00174	1-2 months	0.10898	-0.220357	Lower in Case	0.0240144	Maternal Fecal Metagenome (Genes) at 1-2m
maternal_gene_12	1	K20682	1-2 months	0.0932021	-0.246306	Lower in Case	0.0229563	Maternal Fecal Metagenome (Genes) at 1-2m
maternal_gene_12	1	K01951	1-2 months	0.092425	-0.235628	Lower in Case	0.021778	Maternal Fecal Metagenome (Genes) at 1-2m
maternal_gene_12	1	K25998	1-2 months	0.0933577	-0.226876	Lower in Case	0.0211806	Maternal Fecal Metagenome (Genes) at 1-2m
maternal_gene_12	1	K02035	1-2 months	0.0816894	-0.229543	Lower in Case	0.0187512	Maternal Fecal Metagenome (Genes) at 1-2m
maternal_gene_12	1	K14155	1-2 months	0.0866215	-0.204984	Lower in Case	0.017756	Maternal Fecal Metagenome (Genes) at 1-2m
maternal_gene_12	1	K14577	1-2 months	0.0733189	-0.240636	Lower in Case	0.0176432	Maternal Fecal Metagenome (Genes) at 1-2m
maternal_gene_12	1	K01996	1-2 months	0.0641235	-0.272043	Lower in Case	0.0174443	Maternal Fecal Metagenome (Genes) at 1-2m
maternal_gene_12	1	K22323	1-2 months	0.0651219	-0.248836	Lower in Case	0.0162047	Maternal Fecal Metagenome (Genes) at 1-2m
maternal_gene_12	1	K02039	1-2 months	0.0634093	-0.253104	Lower in Case	0.0160491	Maternal Fecal Metagenome (Genes) at 1-2m
maternal_gene_12	1	K01886	1-2 months	0.0673631	-0.230612	Lower in Case	0.0155347	Maternal Fecal Metagenome (Genes) at 1-2m
maternal_gene_12	1	K02034	1-2 months	0.0603715	-0.23388	Lower in Case	0.0141197	Maternal Fecal Metagenome (Genes) at 1-2m
maternal_gene_12	1	K07045	1-2 months	0.0597262	-0.226761	Lower in Case	0.0135436	Maternal Fecal Metagenome (Genes) at 1-2m
maternal_gene_12	1	K12907	1-2 months	0.0546323	-0.239558	Lower in Case	0.0130876	Maternal Fecal Metagenome (Genes) at 1-2m
maternal_gene_12	1	K20548	1-2 months	0.0523806	-0.241111	Lower in Case	0.0126295	Maternal Fecal Metagenome (Genes) at 1-2m
maternal_gene_12	1	K19635	1-2 months	0.0492081	-0.248703	Lower in Case	0.0122382	Maternal Fecal Metagenome (Genes) at 1-2m
maternal_gene_12	1	K01999	1-2 months	0.0438973	-0.247608	Lower in Case	0.0108693	Maternal Fecal Metagenome (Genes) at 1-2m
maternal_gene_12	1	K01995	1-2 months	0.036556	-0.249233	Lower in Case	0.00911095	Maternal Fecal Metagenome (Genes) at 1-2m
maternal_gene_12	1	K02010	1-2 months	0.0325062	-0.259696	Lower in Case	0.00844173	Maternal Fecal Metagenome (Genes) at 1-2m
maternal_gene_12	1	K01997	1-2 months	0.0224526	-0.24634	Lower in Case	0.00553097	Maternal Fecal Metagenome (Genes) at 1-2m
maternal_gene_12	1	K20569	1-2 months	0.0205536	-0.237054	Lower in Case	0.00487232	Maternal Fecal Metagenome (Genes) at 1-2m
maternal_gene_12	1	K19055	1-2 months	0.0183438	-0.240885	Lower in Case	0.00441874	Maternal Fecal Metagenome (Genes) at 1-2m
maternal_gene_12	1	K02031	1-2 months	0.0150084	-0.250967	Lower in Case	0.00376662	Maternal Fecal Metagenome (Genes) at 1-2m
maternal_gene_12	1	K08722	1-2 months	0.0140257	-0.263331	Lower in Case	0.0036934	Maternal Fecal Metagenome (Genes) at 1-2m
maternal_gene_12	1	K17051	1-2 months	0.0129432	-0.227937	Lower in Case	0.00295024	Maternal Fecal Metagenome (Genes) at 1-2m
maternal_gene_12	1	K07090	1-2 months	0.00770575	-0.273354	Lower in Case	0.0021064	Maternal Fecal Metagenome (Genes) at 1-2m
maternal_gene_12	1	K19653	1-2 months	0.00528717	-0.248906	Lower in Case	0.00131601	Maternal Fecal Metagenome (Genes) at 1-2m
maternal_gene_12	1	K01270	1-2 months	0.0032098	-0.188785	Lower in Case	0.000605961	Maternal Fecal Metagenome (Genes) at 1-2m
maternal_gene_12	1	K21673	1-2 months	0.00106705	-0.200189	Lower in Case	0.000213612	Maternal Fecal Metagenome (Genes) at 1-2m
maternal_prot_dep_12	1	P01040	1-2 months	0.408117	-0.165212	Lower in Case	0.0674256	Plasma Proteome (Depleted) at 1-2m
maternal_prot_dep_12	1	P15169	1-2 months	-0.55709	0.114948	Higher in Case	0.0640363	Plasma Proteome (Depleted) at 1-2m
maternal_prot_dep_12	1	P36980	1-2 months	-0.304196	0.195183	Higher in Case	0.0593738	Plasma Proteome (Depleted) at 1-2m
maternal_prot_dep_12	1	P09871	1-2 months	-0.326369	0.0844988	Higher in Case	0.0275778	Plasma Proteome (Depleted) at 1-2m
maternal_prot_dep_12	1	A8MT70	1-2 months	0.226905	-0.059421	Lower in Case	0.0134829	Plasma Proteome (Depleted) at 1-2m
maternal_prot_dep_12	1	Q96IY4	1-2 months	-0.255938	0.0468161	Higher in Case	0.011982	Plasma Proteome (Depleted) at 1-2m
maternal_prot_dep_12	1	A0A0C4DH29	1-2 months	0.15964	-0.0708427	Lower in Case	0.0113093	Plasma Proteome (Depleted) at 1-2m
maternal_prot_dep_12	1	P05160	1-2 months	-0.212441	0.045417	Higher in Case	0.00964842	Plasma Proteome (Depleted) at 1-2m
maternal_prot_dep_12	1	P51884	1-2 months	-0.0593646	0.145227	Higher in Case	0.00862132	Plasma Proteome (Depleted) at 1-2m
maternal_prot_dep_12	1	Q9Y4F9	1-2 months	0.0849254	-0.0882299	Lower in Case	0.00749296	Plasma Proteome (Depleted) at 1-2m
maternal_prot_dep_12	1	O43490	1-2 months	0.190801	-0.0371337	Lower in Case	0.00708516	Plasma Proteome (Depleted) at 1-2m
maternal_prot_dep_12	1	P48740	1-2 months	-0.148464	-0.0410662	Lower in Case	0.00609684	Plasma Proteome (Depleted) at 1-2m
maternal_prot_dep_12	1	Q13451	1-2 months	0.0888388	-0.0563457	Lower in Case	0.00500568	Plasma Proteome (Depleted) at 1-2m
maternal_prot_dep_12	1	P05156	1-2 months	-0.108696	0.040266	Higher in Case	0.00437674	Plasma Proteome (Depleted) at 1-2m
maternal_prot_dep_12	1	Q6PEZ8	1-2 months	0.0938437	-0.0453824	Lower in Case	0.00425885	Plasma Proteome (Depleted) at 1-2m
maternal_prot_dep_12	1	Q9P0W8	1-2 months	0.131962	-0.031541	Lower in Case	0.00416221	Plasma Proteome (Depleted) at 1-2m
maternal_prot_dep_12	1	P06396	1-2 months	-0.0555196	0.0536393	Higher in Case	0.00297803	Plasma Proteome (Depleted) at 1-2m
maternal_prot_dep_12	1	P25311	1-2 months	-0.0176281	0.155779	Higher in Case	0.00274608	Plasma Proteome (Depleted) at 1-2m
maternal_prot_dep_12	1	Q12805	1-2 months	-0.0267068	0.060455	Higher in Case	0.00161456	Plasma Proteome (Depleted) at 1-2m
maternal_prot_dep_12	1	P00488	1-2 months	-0.0887378	0.0169227	Higher in Case	0.00150168	Plasma Proteome (Depleted) at 1-2m
maternal_prot_dep_12	1	O95445	1-2 months	-0.0895645	0.0161173	Higher in Case	0.00144354	Plasma Proteome (Depleted) at 1-2m
maternal_prot_dep_12	1	P29622	1-2 months	-0.0203359	0.0637836	Higher in Case	0.0012971	Plasma Proteome (Depleted) at 1-2m
maternal_prot_dep_12	1	P19823	1-2 months	-0.02085	0.0358148	Higher in Case	0.000746739	Plasma Proteome (Depleted) at 1-2m
maternal_prot_dep_12	1	P05155	1-2 months	-0.0210753	0.0216212	Higher in Case	0.000455673	Plasma Proteome (Depleted) at 1-2m
maternal_prot_dep_12	1	P22792	1-2 months	-0.00528701	0.0761204	Higher in Case	0.00040245	Plasma Proteome (Depleted) at 1-2m
maternal_prot_nav_12	1	P15814	1-2 months	0.447456	-0.201706	Lower in Case	0.0902546	Plasma Proteome (Naive) at 1-2m
maternal_prot_nav_12	1	Q9NXZ2	1-2 months	-0.521019	0.141339	Higher in Case	0.0736405	Plasma Proteome (Naive) at 1-2m
maternal_prot_nav_12	1	Q5T5C0	1-2 months	-0.292749	0.168336	Higher in Case	0.0492802	Plasma Proteome (Naive) at 1-2m
maternal_prot_nav_12	1	O14975	1-2 months	0.29663	-0.0943754	Lower in Case	0.0279946	Plasma Proteome (Naive) at 1-2m
maternal_prot_nav_12	1	P04083	1-2 months	-0.274273	0.10057	Higher in Case	0.0275837	Plasma Proteome (Naive) at 1-2m
maternal_prot_nav_12	1	P02786	1-2 months	-0.0800022	0.244314	Higher in Case	0.0195457	Plasma Proteome (Naive) at 1-2m
maternal_prot_nav_12	1	P02751	1-2 months	-0.190731	0.0808402	Higher in Case	0.0154187	Plasma Proteome (Naive) at 1-2m
maternal_prot_nav_12	1	P07357	1-2 months	0.235077	-0.0642076	Lower in Case	0.0150938	Plasma Proteome (Naive) at 1-2m
maternal_prot_nav_12	1	P01704	1-2 months	-0.157676	0.0793406	Higher in Case	0.0125101	Plasma Proteome (Naive) at 1-2m
maternal_prot_nav_12	1	O95954	1-2 months	-0.102569	0.0775732	Higher in Case	0.00795659	Plasma Proteome (Naive) at 1-2m
maternal_prot_nav_12	1	P01619	1-2 months	-0.0523059	0.132117	Higher in Case	0.0069105	Plasma Proteome (Naive) at 1-2m
maternal_prot_nav_12	1	Q9P1Y5	1-2 months	-0.0956247	0.0714632	Higher in Case	0.00683364	Plasma Proteome (Naive) at 1-2m
maternal_prot_nav_12	1	P01591	1-2 months	-0.0906866	0.0729903	Higher in Case	0.00661925	Plasma Proteome (Naive) at 1-2m
maternal_prot_nav_12	1	P07358	1-2 months	0.0597225	-0.0752688	Lower in Case	0.00449524	Plasma Proteome (Naive) at 1-2m
maternal_prot_nav_12	1	P00740	1-2 months	0.0400934	-0.0728913	Lower in Case	0.00292246	Plasma Proteome (Naive) at 1-2m
maternal_prot_nav_12	1	P35858	1-2 months	0.327338	0.00890973	Higher in Case	0.0029165	Plasma Proteome (Naive) at 1-2m
maternal_prot_nav_12	1	P55056	1-2 months	0.053403	-0.0444611	Lower in Case	0.00237436	Plasma Proteome (Naive) at 1-2m
maternal_prot_nav_12	1	P42680	1-2 months	-0.0549228	-0.0402076	Lower in Case	0.00220832	Plasma Proteome (Naive) at 1-2m
maternal_prot_nav_12	1	P48634	1-2 months	-0.0382862	0.0576767	Higher in Case	0.00220822	Plasma Proteome (Naive) at 1-2m
maternal_prot_nav_12	1	P05090	1-2 months	-0.0652558	-0.0232047	Lower in Case	0.00151424	Plasma Proteome (Naive) at 1-2m
maternal_prot_nav_12	1	P28749	1-2 months	0.00978139	-0.153757	Lower in Case	0.00150396	Plasma Proteome (Naive) at 1-2m
maternal_prot_nav_12	1	Q4KWH8	1-2 months	0.00655177	-0.0660991	Lower in Case	0.000433066	Plasma Proteome (Naive) at 1-2m
maternal_prot_nav_12	1	O43866	1-2 months	-0.0389402	-0.00660453	Lower in Case	0.000257182	Plasma Proteome (Naive) at 1-2m
maternal_prot_nav_12	1	Q6PEZ8	1-2 months	0.0174977	-0.0136372	Lower in Case	0.000238619	Plasma Proteome (Naive) at 1-2m
maternal_prot_nav_12	1	Q6PGP7	1-2 months	-0.000321517	0.170842	Higher in Case	5.49286e-05	Plasma Proteome (Naive) at 1-2m
maternal_taxa_12	1	Unknown_CAG.170.2	1-2 months	0.407256	-0.365783	Lower in Case	0.148968	Maternal Fecal Microbiome (Taxa) at 1-2m
maternal_taxa_12	1	CAG.170.sp003516765	1-2 months	0.228097	-0.362097	Lower in Case	0.0825933	Maternal Fecal Microbiome (Taxa) at 1-2m
maternal_taxa_12	1	Unknown_Oscillospiraceae.16	1-2 months	0.227063	-0.29167	Lower in Case	0.0662275	Maternal Fecal Microbiome (Taxa) at 1-2m
maternal_taxa_12	1	UBA1777.sp900549645	1-2 months	0.319085	-0.202645	Lower in Case	0.0646609	Maternal Fecal Microbiome (Taxa) at 1-2m
maternal_taxa_12	1	Unknown_Roseburia.7	1-2 months	-0.352254	0.182431	Higher in Case	0.0642621	Maternal Fecal Microbiome (Taxa) at 1-2m
maternal_taxa_12	1	Unknown_CAG.170.6	1-2 months	0.200287	-0.310482	Lower in Case	0.0621856	Maternal Fecal Microbiome (Taxa) at 1-2m
maternal_taxa_12	1	Unknown_ER4	1-2 months	0.247743	-0.241253	Lower in Case	0.0597687	Maternal Fecal Microbiome (Taxa) at 1-2m
maternal_taxa_12	1	Acetatifactor.sp003447295	1-2 months	-0.229004	0.258702	Higher in Case	0.0592437	Maternal Fecal Microbiome (Taxa) at 1-2m
maternal_taxa_12	1	Unknown_CAG.170.8	1-2 months	0.315976	-0.157504	Lower in Case	0.0497674	Maternal Fecal Microbiome (Taxa) at 1-2m
maternal_taxa_12	1	Unknown_ER4.8	1-2 months	0.2983	-0.14818	Lower in Case	0.0442021	Maternal Fecal Microbiome (Taxa) at 1-2m
maternal_taxa_12	1	Unknown_CAG.170.10	1-2 months	0.174842	-0.193246	Lower in Case	0.0337875	Maternal Fecal Microbiome (Taxa) at 1-2m
maternal_taxa_12	1	CAG.170.sp900555665	1-2 months	0.20921	-0.157871	Lower in Case	0.0330282	Maternal Fecal Microbiome (Taxa) at 1-2m
maternal_taxa_12	1	CAG.83.sp900555735	1-2 months	0.133534	-0.244203	Lower in Case	0.0326094	Maternal Fecal Microbiome (Taxa) at 1-2m
maternal_taxa_12	1	CAG.170.sp900553545	1-2 months	0.0999272	-0.250033	Lower in Case	0.0249851	Maternal Fecal Microbiome (Taxa) at 1-2m
maternal_taxa_12	1	Unknown_CAG.390	1-2 months	0.0859522	-0.289191	Lower in Case	0.0248566	Maternal Fecal Microbiome (Taxa) at 1-2m
maternal_taxa_12	1	ER4.sp003522105	1-2 months	0.0985425	-0.219989	Lower in Case	0.0216782	Maternal Fecal Microbiome (Taxa) at 1-2m
maternal_taxa_12	1	CAG.170.sp000432135	1-2 months	0.0924362	-0.227616	Lower in Case	0.02104	Maternal Fecal Microbiome (Taxa) at 1-2m
maternal_taxa_12	1	QAMX01.sp004555605	1-2 months	0.0953307	-0.120398	Lower in Case	0.0114777	Maternal Fecal Microbiome (Taxa) at 1-2m
maternal_taxa_12	1	CAG.83.sp900547745	1-2 months	0.0586977	-0.135887	Lower in Case	0.00797628	Maternal Fecal Microbiome (Taxa) at 1-2m
maternal_taxa_12	1	CAG.272.sp000433515	1-2 months	0.136625	-0.0535074	Lower in Case	0.00731044	Maternal Fecal Microbiome (Taxa) at 1-2m
maternal_taxa_12	1	CAG.170.sp000436735	1-2 months	0.02746	-0.263592	Lower in Case	0.00723824	Maternal Fecal Microbiome (Taxa) at 1-2m
maternal_taxa_12	1	SFFH01.sp900542395	1-2 months	0.0252477	-0.210955	Lower in Case	0.00532612	Maternal Fecal Microbiome (Taxa) at 1-2m
maternal_taxa_12	1	CAG.110.sp900549705	1-2 months	0.012907	-0.299237	Lower in Case	0.00386227	Maternal Fecal Microbiome (Taxa) at 1-2m
maternal_taxa_12	1	UBA10281.sp900548285	1-2 months	0.0341473	-0.099256	Lower in Case	0.00338932	Maternal Fecal Microbiome (Taxa) at 1-2m
maternal_taxa_12	1	CAG.83.sp900545495.1	1-2 months	0.0133194	-0.12863	Lower in Case	0.00171327	Maternal Fecal Microbiome (Taxa) at 1-2m
milk_bioactive_1421	1	Insulin	14-21 days	0.489084	-0.124809	Lower in Case	0.061042	Milk Bioactive Proteins at 14-21d
milk_bioactive_1421	1	IgA	14-21 days	0.725405	-0.0777169	Lower in Case	0.0563762	Milk Bioactive Proteins at 14-21d
milk_bioactive_1421	1	FGF-21	14-21 days	0.48434	-0.0186019	Lower in Case	0.00900967	Milk Bioactive Proteins at 14-21d
milk_hmo_1421	1	Fuc_nmol/mL	14-21 days	-0.781857	0.185948	Higher in Case	0.145384	Milk HMOs at 14-21d
milk_hmo_1421	1	DFLNT_nmol/mL	14-21 days	-0.470436	0.27606	Higher in Case	0.129868	Milk HMOs at 14-21d
milk_hmo_1421	1	DFLac_nmol/mL	14-21 days	-0.407376	0.18586	Higher in Case	0.0757149	Milk HMOs at 14-21d
milk_hmo_1421	1	2'FL_nmol/mL	14-21 days	-0.0297171	0.063392	Higher in Case	0.00188383	Milk HMOs at 14-21d
milk_hmo_1421	1	Secretor	14-21 days	-0.0234929	0.0742599	Higher in Case	0.00174458	Milk HMOs at 14-21d
milk_macro_micro_1421	1	Cu	14-21 days	0.722384	-0.106763	Lower in Case	0.0771238	Milk Macro- and Micronutrients at 14-21d
milk_macro_micro_1421	1	Mo	14-21 days	0.265562	-0.143985	Lower in Case	0.038237	Milk Macro- and Micronutrients at 14-21d
milk_macro_micro_1421	1	K	14-21 days	0.395105	-0.0966496	Lower in Case	0.0381867	Milk Macro- and Micronutrients at 14-21d
milk_macro_micro_1421	1	PLP	14-21 days	-0.380235	0.0901614	Higher in Case	0.0342825	Milk Macro- and Micronutrients at 14-21d
milk_macro_micro_1421	1	Se	14-21 days	0.20014	-0.0951249	Lower in Case	0.0190383	Milk Macro- and Micronutrients at 14-21d
milk_macro_micro_1421	1	Cr	14-21 days	0.172543	-0.0714432	Lower in Case	0.012327	Milk Macro- and Micronutrients at 14-21d
milk_macro_micro_1421	1	TRP	14-21 days	-0.0211326	0.120252	Higher in Case	0.00254124	Milk Macro- and Micronutrients at 14-21d
milk_macro_micro_1421	1	PA	14-21 days	0.189656	0.0074904	Higher in Case	0.0014206	Milk Macro- and Micronutrients at 14-21d
milk_macro_micro_1421	1	B12	14-21 days	0.00658824	-0.0939734	Lower in Case	0.000619119	Milk Macro- and Micronutrients at 14-21d
milk_macro_micro_1421	1	Zn	14-21 days	0.0257989	0.0070177	Higher in Case	0.000181049	Milk Macro- and Micronutrients at 14-21d
milk_metabolome_1421	1	rLC_neg_mtb_1325213	14-21 days	-0.276827	0.312552	Higher in Case	0.086523	Milk Metabolome at 14-21d	1047.34	105	negative
milk_metabolome_1421	1	rLC_pos_mtb_710808	14-21 days	-0.16322	0.354109	Higher in Case	0.0577978	Milk Metabolome at 14-21d	514.204	52	positive
milk_metabolome_1421	1	rLC_neg_mtb_4060942	14-21 days	0.233653	-0.244825	Lower in Case	0.0572041	Milk Metabolome at 14-21d	676.989	296	negative
milk_metabolome_1421	1	rLC_neg_mtb_1354390	14-21 days	-0.181444	0.294808	Higher in Case	0.0534911	Milk Metabolome at 14-21d	1045.84	97	negative
milk_metabolome_1421	1	rLC_neg_mtb_1272690	14-21 days	-0.164553	0.313993	Higher in Case	0.0516685	Milk Metabolome at 14-21d	1100.87	99	negative
milk_metabolome_1421	1	rLC_neg_mtb_158442	14-21 days	0.416326	-0.119648	Lower in Case	0.0498124	Milk Metabolome at 14-21d	1565.19	25	negative
milk_metabolome_1421	1	rLC_neg_mtb_6055316	14-21 days	-0.228092	0.212374	Higher in Case	0.0484409	Milk Metabolome at 14-21d	675.412	446	negative
milk_metabolome_1421	1	rLC_neg_mtb_158157	14-21 days	-0.169821	0.268792	Higher in Case	0.0456465	Milk Metabolome at 14-21d	1554.06	14	negative
milk_metabolome_1421	1	rLC_neg_mtb_159800	14-21 days	-0.117407	0.383271	Higher in Case	0.0449988	Milk Metabolome at 14-21d	1673.83	14	negative
milk_metabolome_1421	1	rLC_neg_mtb_6087749	14-21 days	-0.207038	0.19166	Higher in Case	0.0396809	Milk Metabolome at 14-21d	601.412	444	negative
milk_metabolome_1421	1	rLC_neg_mtb_1605385	14-21 days	-0.10793	0.284818	Higher in Case	0.0307404	Milk Metabolome at 14-21d	920.323	112	negative
milk_metabolome_1421	1	rLC_pos_mtb_3036954	14-21 days	-0.145958	0.209543	Higher in Case	0.0305845	Milk Metabolome at 14-21d	520.338	217	positive
milk_metabolome_1421	1	rLC_pos_mtb_900459	14-21 days	-0.0907781	0.330763	Higher in Case	0.0300261	Milk Metabolome at 14-21d	350.145	52	positive
milk_metabolome_1421	1	rLC_neg_mtb_6052863	14-21 days	-0.169681	0.161601	Higher in Case	0.0274207	Milk Metabolome at 14-21d	589.393	448	negative
milk_metabolome_1421	1	rLC_neg_mtb_6115572	14-21 days	-0.162576	0.156665	Higher in Case	0.02547	Milk Metabolome at 14-21d	633.398	448	negative
milk_metabolome_1421	1	rLC_neg_mtb_6361639	14-21 days	-0.172023	0.14539	Higher in Case	0.0250103	Milk Metabolome at 14-21d	700.448	469	negative
milk_metabolome_1421	1	rLC_neg_mtb_6057149	14-21 days	-0.0997281	0.208345	Higher in Case	0.0207779	Milk Metabolome at 14-21d	743.416	446	negative
milk_metabolome_1421	1	rLC_neg_mtb_5741404	14-21 days	-0.110041	0.173772	Higher in Case	0.0191219	Milk Metabolome at 14-21d	755.621	422	negative
milk_metabolome_1421	1	rLC_neg_mtb_6052104	14-21 days	-0.1202	0.15044	Higher in Case	0.0180828	Milk Metabolome at 14-21d	561.408	446	negative
milk_metabolome_1421	1	rLC_neg_mtb_6389862	14-21 days	-0.145805	0.114912	Higher in Case	0.0167548	Milk Metabolome at 14-21d	697.453	469	negative
milk_metabolome_1421	1	rLC_neg_mtb_1830814	14-21 days	0.134387	-0.102414	Lower in Case	0.0137631	Milk Metabolome at 14-21d	142.998	134	negative	E1121	C01127;C05946	4-Hydroxy-2-oxoglutarate; 4-Hydroxy-2-oxoglutaric acid$4-Hydroxy-2-oxoglutarate
milk_metabolome_1421	1	rLC_neg_mtb_6030042	14-21 days	-0.114161	0.11619	Higher in Case	0.0132644	Milk Metabolome at 14-21d	1095.77	448	negative
milk_metabolome_1421	1	rLC_neg_mtb_6390866	14-21 days	-0.093855	0.123159	Higher in Case	0.0115591	Milk Metabolome at 14-21d	743.455	469	negative
milk_metabolome_1421	1	rLC_neg_mtb_6053956	14-21 days	-0.105246	0.107543	Higher in Case	0.0113185	Milk Metabolome at 14-21d	629.408	448	negative
milk_metabolome_1421	1	rLC_neg_mtb_6030025	14-21 days	-0.11141	0.0956823	Higher in Case	0.0106599	Milk Metabolome at 14-21d	1094.77	446	negative
milk_metabolome_1421	1	rLC_neg_mtb_2249315	14-21 days	0.101693	-0.0953818	Lower in Case	0.00969966	Milk Metabolome at 14-21d	410.116	0.18	negative
milk_metabolome_1421	1	rLC_neg_mtb_6359872	14-21 days	-0.0674176	0.143374	Higher in Case	0.00966593	Milk Metabolome at 14-21d	589.439	469	negative
milk_metabolome_1421	1	rLC_pos_mtb_4288629	14-21 days	-0.132682	0.067309	Higher in Case	0.00893067	Milk Metabolome at 14-21d	598.486	293	positive
milk_metabolome_1421	1	rLC_neg_mtb_1892128	14-21 days	0.190399	-0.0403942	Lower in Case	0.00769102	Milk Metabolome at 14-21d	1055.37	143	negative
milk_metabolome_1421	1	rLC_neg_mtb_1328263	14-21 days	-0.0322936	0.237952	Higher in Case	0.00768432	Milk Metabolome at 14-21d	1265.92	99	negative
milk_metabolome_1421	1	rLC_neg_mtb_2264868	14-21 days	0.0834961	-0.0875113	Lower in Case	0.00730685	Milk Metabolome at 14-21d	220.118	174	negative
milk_metabolome_1421	1	rLC_neg_mtb_1374567	14-21 days	0.0748099	-0.0974371	Lower in Case	0.00728926	Milk Metabolome at 14-21d	770.216	101	negative
milk_metabolome_1421	1	rLC_neg_mtb_6791879	14-21 days	-0.0584394	0.123045	Higher in Case	0.0071907	Milk Metabolome at 14-21d	688.465	496	negative
milk_metabolome_1421	1	rLC_neg_mtb_6361660	14-21 days	-0.0557644	0.125661	Higher in Case	0.00700741	Milk Metabolome at 14-21d	701.447	469	negative
milk_metabolome_1421	1	rLC_neg_mtb_6055275	14-21 days	-0.0435094	0.160776	Higher in Case	0.00699528	Milk Metabolome at 14-21d	674.413	448	negative
milk_metabolome_1421	1	rLC_neg_mtb_1505881	14-21 days	0.213699	0.0280356	Higher in Case	0.00599119	Milk Metabolome at 14-21d	1341.46	0.11	negative
milk_metabolome_1421	1	rLC_neg_mtb_1600458	14-21 days	0.0380024	0.154754	Higher in Case	0.00588101	Milk Metabolome at 14-21d	646.218	114	negative
milk_metabolome_1421	1	rLC_neg_mtb_1565959	14-21 days	0.0825336	0.0663054	Higher in Case	0.00547242	Milk Metabolome at 14-21d	142.051	128	negative	E754;E756	C00956;C04092;C00450	L-2-Aminoadipate; L-alpha-Aminoadipate; L-alpha-Aminoadipic acid; L-2-Aminoadipic acid; L-2-Aminohexanedioate;delta1-Piperideine-2-carboxylate; 1,2-Didehydropiperidine-2-carboxylate$2,3,4,5-Tetrahydropyridine-2-carboxylate; delta1-Piperideine-6-L-carboxylate
milk_metabolome_1421	1	rLC_neg_mtb_6024136	14-21 days	-0.0415729	0.123998	Higher in Case	0.00515497	Milk Metabolome at 14-21d	702.408	446	negative
milk_metabolome_1421	1	rLC_neg_mtb_6388483	14-21 days	-0.0461415	0.108098	Higher in Case	0.00498781	Milk Metabolome at 14-21d	629.443	469	negative
milk_metabolome_1421	1	rLC_neg_mtb_6421331	14-21 days	-0.0391068	0.124213	Higher in Case	0.00485757	Milk Metabolome at 14-21d	672.453	469	negative
milk_metabolome_1421	1	rLC_neg_mtb_1223525	14-21 days	0.244853	-0.0174905	Lower in Case	0.00428262	Milk Metabolome at 14-21d	1631.55	93	negative
milk_metabolome_1421	1	rLC_neg_mtb_1867331	14-21 days	-0.016848	0.228615	Higher in Case	0.00385171	Milk Metabolome at 14-21d	1096.33	151	negative
milk_metabolome_1421	1	rLC_pos_mtb_203683	14-21 days	0.0725149	-0.0520403	Lower in Case	0.0037737	Milk Metabolome at 14-21d	366.138	19	positive	E317;E319	CE6229;mn;C00611	13E-tetranor-16-carboxy-LTE4;beta-1,4-mannose-N-acetylglucosamine$N-Acetyllactosamine; beta-D-Galactosyl-1,4-N-acetyl-D-glucosamine; beta-D-Galactosyl-1,4-N-acetyl-beta-D-glucosamine
milk_metabolome_1421	1	rLC_neg_mtb_2419627	14-21 days	0.0519499	0.0585785	Higher in Case	0.00304315	Milk Metabolome at 14-21d	634.208	194	negative
milk_metabolome_1421	1	rLC_pos_mtb_3952867	14-21 days	-0.0455266	0.0455321	Higher in Case	0.00207292	Milk Metabolome at 14-21d	469.423	279	positive
milk_metabolome_1421	1	rLC_neg_mtb_1659187	14-21 days	-0.00258839	0.368676	Higher in Case	0.000954279	Milk Metabolome at 14-21d	921.317	128	negative
milk_metabolome_1421	1	rLC_neg_mtb_3608040	14-21 days	-0.0161	0.0205577	Higher in Case	0.000330979	Milk Metabolome at 14-21d	144.111	267	negative	E2572	C06423	Octanoic acid; Caprylic acid; Octylic acid
milk_metabolome_1421	1	rLC_neg_mtb_1939354	14-21 days	-0.000339838	0.340502	Higher in Case	0.000115715	Milk Metabolome at 14-21d	1097.34	138	negative
milk_metabolome_1421	1	rLC_neg_mtb_2493309	14-21 days	0.0592971	-0.0013083	Lower in Case	7.75783e-05	Milk Metabolome at 14-21d	528.162	196	negative
milk_targeted_1421	1	HexCer.d18.2.22.0.	14-21 days	0.464994	-0.161595	Lower in Case	0.0751407	Milk Targeted Metabolites at 14-21d
milk_targeted_1421	1	TG.20.3_32.2.	14-21 days	-0.210305	0.225588	Higher in Case	0.0474422	Milk Targeted Metabolites at 14-21d
milk_targeted_1421	1	TG.18.0_32.0.	14-21 days	0.33043	-0.120538	Lower in Case	0.0398293	Milk Targeted Metabolites at 14-21d
milk_targeted_1421	1	CE.18.2.	14-21 days	0.10978	-0.232176	Lower in Case	0.0254883	Milk Targeted Metabolites at 14-21d
milk_targeted_1421	1	DG.18.1_20.3.	14-21 days	-0.305411	0.0766821	Higher in Case	0.0234196	Milk Targeted Metabolites at 14-21d
milk_targeted_1421	1	TG.16.0_32.0.	14-21 days	0.246288	-0.0939398	Lower in Case	0.0231362	Milk Targeted Metabolites at 14-21d
milk_targeted_1421	1	DG.16.0_20.3.	14-21 days	-0.335768	0.0653246	Higher in Case	0.0219339	Milk Targeted Metabolites at 14-21d
milk_targeted_1421	1	FA.20.2.	14-21 days	-0.274437	0.0753799	Higher in Case	0.020687	Milk Targeted Metabolites at 14-21d
milk_targeted_1421	1	TG.20.3_32.1.	14-21 days	-0.0868736	0.225103	Higher in Case	0.0195556	Milk Targeted Metabolites at 14-21d
milk_targeted_1421	1	HexCer.d18.2.24.0.	14-21 days	0.135579	-0.144173	Lower in Case	0.0195469	Milk Targeted Metabolites at 14-21d
milk_targeted_1421	1	FA.12.0.	14-21 days	-0.193227	-0.0575581	Lower in Case	0.0111218	Milk Targeted Metabolites at 14-21d
milk_targeted_1421	1	TG.14.0_38.5.	14-21 days	-0.0612662	0.180475	Higher in Case	0.011057	Milk Targeted Metabolites at 14-21d
milk_targeted_1421	1	TG.14.0_34.3.	14-21 days	-0.0744943	0.140059	Higher in Case	0.0104336	Milk Targeted Metabolites at 14-21d
milk_targeted_1421	1	TG.16.0_34.0.	14-21 days	0.144883	-0.059138	Lower in Case	0.00856808	Milk Targeted Metabolites at 14-21d
milk_targeted_1421	1	DG.18.2_18.3.	14-21 days	-0.0752358	0.0778545	Higher in Case	0.00585745	Milk Targeted Metabolites at 14-21d
milk_targeted_1421	1	TG.14.0_32.2.	14-21 days	-0.0618517	0.0801443	Higher in Case	0.00495707	Milk Targeted Metabolites at 14-21d
milk_targeted_1421	1	lysoPC.a.C26.1	14-21 days	0.0691841	-0.0685336	Lower in Case	0.00474143	Milk Targeted Metabolites at 14-21d
milk_targeted_1421	1	DG.14.0_18.1.	14-21 days	-0.207517	0.0158882	Higher in Case	0.00329707	Milk Targeted Metabolites at 14-21d
milk_targeted_1421	1	FA.20.3.	14-21 days	-0.31987	-0.00742441	Lower in Case	0.00237485	Milk Targeted Metabolites at 14-21d
milk_targeted_1421	1	DG.14.0_18.2.	14-21 days	-0.129182	-0.0125979	Lower in Case	0.00162743	Milk Targeted Metabolites at 14-21d
milk_targeted_1421	1	FA.14.0.	14-21 days	-0.0205345	-0.0564492	Lower in Case	0.00115916	Milk Targeted Metabolites at 14-21d
milk_targeted_1421	1	PC.aa.C38.3	14-21 days	-0.016574	0.0494027	Higher in Case	0.0008188	Milk Targeted Metabolites at 14-21d
milk_targeted_1421	1	C0	14-21 days	0.0248733	-0.0197751	Lower in Case	0.000491873	Milk Targeted Metabolites at 14-21d
milk_targeted_1421	1	AA	14-21 days	-0.00450939	-0.0648207	Lower in Case	0.000292302	Milk Targeted Metabolites at 14-21d
milk_targeted_1421	1	FA.18.1.	14-21 days	-0.0713587	-0.00216564	Lower in Case	0.000154537	Milk Targeted Metabolites at 14-21d
milk_taxa_1421	1	Exiguobacterium_A.sp2	14-21 days	0.513034	-0.161823	Lower in Case	0.0830208	Milk Microbiome at 14-21d
milk_taxa_1421	1	Rothia.sp001808955.14	14-21 days	0.418043	-0.132327	Lower in Case	0.0553182	Milk Microbiome at 14-21d
milk_taxa_1421	1	Unclassified.Micrococcaceae.sp12	14-21 days	-0.164925	0.310697	Higher in Case	0.0512419	Milk Microbiome at 14-21d
milk_taxa_1421	1	Turicibacter.sanguinis	14-21 days	0.394156	-0.0881852	Lower in Case	0.0347588	Milk Microbiome at 14-21d
milk_taxa_1421	1	Unclassified.Enterobacteriaceae_A.sp17	14-21 days	0.148147	-0.178686	Lower in Case	0.0264718	Milk Microbiome at 14-21d
milk_taxa_1421	1	Gordonia_B_376796.sp5	14-21 days	-0.115365	0.220947	Higher in Case	0.0254895	Milk Microbiome at 14-21d
milk_taxa_1421	1	Rhodococcus_C_375578.sp2	14-21 days	-0.115365	0.220947	Higher in Case	0.0254895	Milk Microbiome at 14-21d
milk_taxa_1421	1	VYCW01.sp009842325.1	14-21 days	-0.114815	0.220783	Higher in Case	0.0253492	Milk Microbiome at 14-21d
milk_taxa_1421	1	Brevibacterium.ravenspurgense	14-21 days	0.126537	-0.122095	Lower in Case	0.0154496	Milk Microbiome at 14-21d
milk_taxa_1421	1	Geodermatophilus_A.dictyosporus	14-21 days	-0.0598715	0.233168	Higher in Case	0.0139601	Milk Microbiome at 14-21d
milk_taxa_1421	1	Chryseobacterium_796614.sp16	14-21 days	0.159802	-0.0738766	Lower in Case	0.0118056	Milk Microbiome at 14-21d
milk_taxa_1421	1	Erysipelatoclostridium.sp5	14-21 days	-0.0503711	0.21999	Higher in Case	0.0110811	Milk Microbiome at 14-21d
milk_taxa_1421	1	Unclassified.Micrococcaceae.sp1	14-21 days	0.204949	-0.0510633	Lower in Case	0.0104654	Milk Microbiome at 14-21d
milk_taxa_1421	1	Paracoccus.sp26	14-21 days	0.0720748	-0.144978	Lower in Case	0.0104492	Milk Microbiome at 14-21d
milk_taxa_1421	1	Staphylococcus.sp50	14-21 days	0.383356	-0.025513	Lower in Case	0.00978053	Milk Microbiome at 14-21d
milk_taxa_1421	1	Elizabethkingia.sp1	14-21 days	0.0901322	-0.0927287	Lower in Case	0.00835784	Milk Microbiome at 14-21d
milk_taxa_1421	1	Corynebacterium.dentalis	14-21 days	0.163461	-0.0507577	Lower in Case	0.00829689	Milk Microbiome at 14-21d
milk_taxa_1421	1	Amycolatopsis_D_380830.sp2	14-21 days	0.153646	-0.0484911	Lower in Case	0.00745046	Milk Microbiome at 14-21d
milk_taxa_1421	1	Faecalibacterium.prausnitzii_C_71358.3	14-21 days	0.124221	0.0480991	Higher in Case	0.0059749	Milk Microbiome at 14-21d
milk_taxa_1421	1	Unclassified.Actinomycetaceae.sp2	14-21 days	-0.0332118	0.130875	Higher in Case	0.0043466	Milk Microbiome at 14-21d
milk_taxa_1421	1	Pseudonocardia.sp16	14-21 days	0.0298326	-0.0913656	Lower in Case	0.00272567	Milk Microbiome at 14-21d
milk_taxa_1421	1	Chryseomicrobium.excrementi	14-21 days	0.00451827	-0.106758	Lower in Case	0.000482363	Milk Microbiome at 14-21d
milk_taxa_1421	1	Blastococcus.sp000620185	14-21 days	-0.001546	0.220961	Higher in Case	0.000341605	Milk Microbiome at 14-21d
milk_taxa_1421	1	Nocardioides_A_392796.sp14	14-21 days	0.000683983	0.10059	Higher in Case	6.88021e-05	Milk Microbiome at 14-21d
milk_taxa_1421	1	Gulosibacter.bifidus.1	14-21 days	-0.00029843	0.220703	Higher in Case	6.58645e-05	Milk Microbiome at 14-21d
infant_gene_12	2	K02077	1-2 months	-0.341461	0.0931448	Higher in Case	0.0318053	Infant Fecal Metagenome (Genes) at 1-2m
infant_gene_12	2	K00059	1-2 months	-0.192247	-0.0616711	Lower in Case	0.0118561	Infant Fecal Metagenome (Genes) at 1-2m
infant_gene_12	2	AA1_0	1-2 months	-0.268393	0.0412449	Higher in Case	0.0110698	Infant Fecal Metagenome (Genes) at 1-2m
infant_gene_12	2	GH73_0	1-2 months	-0.460291	0.0230018	Higher in Case	0.0105875	Infant Fecal Metagenome (Genes) at 1-2m
infant_gene_12	2	3003801	1-2 months	-0.0966923	0.0978535	Higher in Case	0.00946168	Infant Fecal Metagenome (Genes) at 1-2m
infant_gene_12	2	K00852	1-2 months	-0.129379	-0.0719867	Lower in Case	0.00931356	Infant Fecal Metagenome (Genes) at 1-2m
infant_gene_12	2	K03710	1-2 months	-0.305099	-0.0201855	Lower in Case	0.00615856	Infant Fecal Metagenome (Genes) at 1-2m
infant_gene_12	2	K14604	1-2 months	-0.127956	-0.0471033	Lower in Case	0.00602714	Infant Fecal Metagenome (Genes) at 1-2m
infant_gene_12	2	K02851	1-2 months	-0.125548	-0.0446713	Lower in Case	0.00560839	Infant Fecal Metagenome (Genes) at 1-2m
infant_gene_12	2	K06901	1-2 months	-0.0964213	-0.0573593	Lower in Case	0.00553066	Infant Fecal Metagenome (Genes) at 1-2m
infant_gene_12	2	K21272	1-2 months	-0.168297	0.0324253	Higher in Case	0.00545708	Infant Fecal Metagenome (Genes) at 1-2m
infant_gene_12	2	K02529	1-2 months	-0.24607	-0.0204389	Lower in Case	0.0050294	Infant Fecal Metagenome (Genes) at 1-2m
infant_gene_12	2	K04488	1-2 months	-0.0547735	-0.0749278	Lower in Case	0.00410406	Infant Fecal Metagenome (Genes) at 1-2m
infant_gene_12	2	K07345	1-2 months	-0.0915501	0.0440514	Higher in Case	0.00403291	Infant Fecal Metagenome (Genes) at 1-2m
infant_gene_12	2	K20590	1-2 months	-0.0732554	-0.0528428	Lower in Case	0.00387102	Infant Fecal Metagenome (Genes) at 1-2m
infant_gene_12	2	K01193	1-2 months	-0.104441	-0.0355333	Lower in Case	0.00371113	Infant Fecal Metagenome (Genes) at 1-2m
infant_gene_12	2	GH32_0	1-2 months	-0.0980663	-0.0377267	Lower in Case	0.00369972	Infant Fecal Metagenome (Genes) at 1-2m
infant_gene_12	2	K18926	1-2 months	-0.129364	0.0231076	Higher in Case	0.00298928	Infant Fecal Metagenome (Genes) at 1-2m
infant_gene_12	2	K21352	1-2 months	-0.139821	-0.0199551	Lower in Case	0.00279016	Infant Fecal Metagenome (Genes) at 1-2m
infant_gene_12	2	K00077	1-2 months	-0.0787781	-0.0311214	Lower in Case	0.00245168	Infant Fecal Metagenome (Genes) at 1-2m
infant_gene_12	2	K15554	1-2 months	-0.0764898	-0.0278589	Lower in Case	0.00213092	Infant Fecal Metagenome (Genes) at 1-2m
infant_gene_12	2	3000620	1-2 months	-0.0798087	0.0266689	Higher in Case	0.00212841	Infant Fecal Metagenome (Genes) at 1-2m
infant_gene_12	2	3002841	1-2 months	-0.0424079	-0.0465327	Lower in Case	0.00197335	Infant Fecal Metagenome (Genes) at 1-2m
infant_gene_12	2	K12634	1-2 months	-0.131834	0.0140797	Higher in Case	0.00185618	Infant Fecal Metagenome (Genes) at 1-2m
infant_gene_12	2	K07480	1-2 months	-0.0150598	0.111762	Higher in Case	0.00168311	Infant Fecal Metagenome (Genes) at 1-2m
infant_gene_12	2	K03406	1-2 months	-0.165847	-0.00994743	Lower in Case	0.00164975	Infant Fecal Metagenome (Genes) at 1-2m
infant_gene_12	2	K00432	1-2 months	-0.0133093	-0.122562	Lower in Case	0.00163121	Infant Fecal Metagenome (Genes) at 1-2m
infant_gene_12	2	K23862	1-2 months	-0.0283477	-0.0564694	Lower in Case	0.00160078	Infant Fecal Metagenome (Genes) at 1-2m
infant_gene_12	2	K22677	1-2 months	-0.0313585	-0.044371	Lower in Case	0.00139141	Infant Fecal Metagenome (Genes) at 1-2m
infant_gene_12	2	K18536	1-2 months	-0.0918472	-0.0149476	Lower in Case	0.00137289	Infant Fecal Metagenome (Genes) at 1-2m
infant_gene_12	2	K03722	1-2 months	-0.232171	0.00574884	Higher in Case	0.00133472	Infant Fecal Metagenome (Genes) at 1-2m
infant_gene_12	2	K10961	1-2 months	-0.183736	-0.00681446	Lower in Case	0.00125206	Infant Fecal Metagenome (Genes) at 1-2m
infant_gene_12	2	K20569	1-2 months	-0.0546493	-0.0190223	Lower in Case	0.00103955	Infant Fecal Metagenome (Genes) at 1-2m
infant_gene_12	2	K14601	1-2 months	-0.0144028	-0.0683676	Lower in Case	0.000984681	Infant Fecal Metagenome (Genes) at 1-2m
infant_gene_12	2	3002813	1-2 months	-0.0380067	-0.025299	Lower in Case	0.000961533	Infant Fecal Metagenome (Genes) at 1-2m
infant_gene_12	2	K15094	1-2 months	-0.0130025	-0.0659744	Lower in Case	0.000857834	Infant Fecal Metagenome (Genes) at 1-2m
infant_gene_12	2	K00626	1-2 months	-0.101197	0.00775222	Higher in Case	0.000784498	Infant Fecal Metagenome (Genes) at 1-2m
infant_gene_12	2	K10440	1-2 months	-0.042864	-0.0173951	Lower in Case	0.000745625	Infant Fecal Metagenome (Genes) at 1-2m
infant_gene_12	2	K05846	1-2 months	-0.191775	-0.00360626	Lower in Case	0.000691589	Infant Fecal Metagenome (Genes) at 1-2m
infant_gene_12	2	K11148	1-2 months	-0.00993571	-0.0684657	Lower in Case	0.000680256	Infant Fecal Metagenome (Genes) at 1-2m
infant_gene_12	2	K00549	1-2 months	-0.0720059	0.00814106	Higher in Case	0.000586205	Infant Fecal Metagenome (Genes) at 1-2m
infant_gene_12	2	K15956	1-2 months	-0.00864056	-0.0666483	Lower in Case	0.000575879	Infant Fecal Metagenome (Genes) at 1-2m
infant_gene_12	2	K15573	1-2 months	-0.00755027	-0.0661493	Lower in Case	0.000499445	Infant Fecal Metagenome (Genes) at 1-2m
infant_gene_12	2	K22607	1-2 months	-0.00480754	-0.0701214	Lower in Case	0.000337111	Infant Fecal Metagenome (Genes) at 1-2m
infant_gene_12	2	3004572	1-2 months	-0.0256742	0.0115327	Higher in Case	0.000296092	Infant Fecal Metagenome (Genes) at 1-2m
infant_gene_12	2	GH42_0	1-2 months	-0.0353401	-0.00551007	Lower in Case	0.000194726	Infant Fecal Metagenome (Genes) at 1-2m
infant_gene_12	2	3001329	1-2 months	-0.0156382	0.0107629	Higher in Case	0.000168312	Infant Fecal Metagenome (Genes) at 1-2m
infant_gene_12	2	K00661	1-2 months	-0.11432	0.0013049	Higher in Case	0.000149176	Infant Fecal Metagenome (Genes) at 1-2m
infant_gene_12	2	K15575	1-2 months	-0.00667871	-0.0171807	Lower in Case	0.000114745	Infant Fecal Metagenome (Genes) at 1-2m
infant_gene_12	2	K16037	1-2 months	-0.0416863	0.000576862	Higher in Case	2.40472e-05	Infant Fecal Metagenome (Genes) at 1-2m
infant_taxa_12	2	Clostridium_E.jeddahense	1-2 months	-0.436112	0.223573	Higher in Case	0.097503	Infant Fecal Microbiome (Taxa) at 1-2m
infant_taxa_12	2	Veillonella_A.magna	1-2 months	-0.435854	0.223105	Higher in Case	0.0972412	Infant Fecal Microbiome (Taxa) at 1-2m
infant_taxa_12	2	Parabacteroides.goldsteinii	1-2 months	-0.434974	0.221552	Higher in Case	0.0963695	Infant Fecal Microbiome (Taxa) at 1-2m
infant_taxa_12	2	Collinsella.vaginalis	1-2 months	-0.330214	0.160248	Higher in Case	0.0529162	Infant Fecal Microbiome (Taxa) at 1-2m
infant_taxa_12	2	Enterobacter.cloacae	1-2 months	-0.281813	0.128328	Higher in Case	0.0361645	Infant Fecal Microbiome (Taxa) at 1-2m
infant_taxa_12	2	Veillonella.parvula	1-2 months	-0.219041	0.125347	Higher in Case	0.0274562	Infant Fecal Microbiome (Taxa) at 1-2m
infant_taxa_12	2	Clostridium.paraputrificum	1-2 months	-0.208204	0.120953	Higher in Case	0.0251829	Infant Fecal Microbiome (Taxa) at 1-2m
infant_taxa_12	2	Mesosutterella.massiliensis	1-2 months	-0.248939	0.0937012	Higher in Case	0.0233259	Infant Fecal Microbiome (Taxa) at 1-2m
infant_taxa_12	2	Schleiferilactobacillus.harbinensis	1-2 months	-0.175204	0.106575	Higher in Case	0.0186724	Infant Fecal Microbiome (Taxa) at 1-2m
infant_taxa_12	2	Enterobacter.roggenkampii	1-2 months	-0.0797829	0.208407	Higher in Case	0.0166273	Infant Fecal Microbiome (Taxa) at 1-2m
infant_taxa_12	2	Campylobacter_A.curvus	1-2 months	-0.0635061	0.222621	Higher in Case	0.0141378	Infant Fecal Microbiome (Taxa) at 1-2m
infant_taxa_12	2	Limosilactobacillus.oris	1-2 months	-0.0905249	0.136809	Higher in Case	0.0123846	Infant Fecal Microbiome (Taxa) at 1-2m
infant_taxa_12	2	Pediococcus.acidilactici	1-2 months	-0.169362	0.0645236	Higher in Case	0.0109278	Infant Fecal Microbiome (Taxa) at 1-2m
infant_taxa_12	2	Veillonella.parvula_A	1-2 months	-0.0775914	0.0932608	Higher in Case	0.00723623	Infant Fecal Microbiome (Taxa) at 1-2m
infant_taxa_12	2	Streptococcus.vestibularis	1-2 months	-0.0183703	0.284173	Higher in Case	0.00522035	Infant Fecal Microbiome (Taxa) at 1-2m
infant_taxa_12	2	Limosilactobacillus.fermentum	1-2 months	-0.0526791	0.0682546	Higher in Case	0.00359559	Infant Fecal Microbiome (Taxa) at 1-2m
infant_taxa_12	2	Proteus.mirabilis	1-2 months	-0.0405278	0.0490679	Higher in Case	0.00198861	Infant Fecal Microbiome (Taxa) at 1-2m
infant_taxa_12	2	Haemophilus_A.parahaemolyticus	1-2 months	-0.000644401	0.221284	Higher in Case	0.000142596	Infant Fecal Microbiome (Taxa) at 1-2m
infant_taxa_12	2	Megamonas.funiformis	1-2 months	-0.000574827	0.223554	Higher in Case	0.000128505	Infant Fecal Microbiome (Taxa) at 1-2m
infant_taxa_12	2	Unknown_Gemella	1-2 months	-0.000572394	0.22235	Higher in Case	0.000127272	Infant Fecal Microbiome (Taxa) at 1-2m
infant_taxa_12	2	Bacteroides.congonensis	1-2 months	-0.000565315	0.223276	Higher in Case	0.000126222	Infant Fecal Microbiome (Taxa) at 1-2m
infant_taxa_12	2	Bifidobacterium.catenulatum	1-2 months	-0.000510781	0.221904	Higher in Case	0.000113344	Infant Fecal Microbiome (Taxa) at 1-2m
infant_taxa_12	2	Bifidobacterium.sp002742445	1-2 months	-0.000509298	0.22187	Higher in Case	0.000112998	Infant Fecal Microbiome (Taxa) at 1-2m
infant_taxa_12	2	Bifidobacterium.kashiwanohense_A	1-2 months	-0.000501176	0.22169	Higher in Case	0.000111106	Infant Fecal Microbiome (Taxa) at 1-2m
infant_taxa_12	2	Ruminococcus_B.gnavus	1-2 months	-0.0112516	0.00459102	Higher in Case	5.16564e-05	Infant Fecal Microbiome (Taxa) at 1-2m
maternal_gene_12	2	K06142	1-2 months	-0.404243	0.0434697	Higher in Case	0.0175723	Maternal Fecal Metagenome (Genes) at 1-2m
maternal_gene_12	2	K14246	1-2 months	-0.185925	-0.0785719	Lower in Case	0.0146084	Maternal Fecal Metagenome (Genes) at 1-2m
maternal_gene_12	2	GH23_0	1-2 months	-0.111296	-0.123799	Lower in Case	0.0137783	Maternal Fecal Metagenome (Genes) at 1-2m
maternal_gene_12	2	K03406	1-2 months	-0.279475	0.0486589	Higher in Case	0.013599	Maternal Fecal Metagenome (Genes) at 1-2m
maternal_gene_12	2	K24528	1-2 months	-0.196977	-0.0669466	Lower in Case	0.013187	Maternal Fecal Metagenome (Genes) at 1-2m
maternal_gene_12	2	K21381	1-2 months	-0.150424	-0.083307	Lower in Case	0.0125314	Maternal Fecal Metagenome (Genes) at 1-2m
maternal_gene_12	2	K16411	1-2 months	-0.181762	-0.0642662	Lower in Case	0.0116811	Maternal Fecal Metagenome (Genes) at 1-2m
maternal_gene_12	2	K24559	1-2 months	-0.152906	-0.0761582	Lower in Case	0.011645	Maternal Fecal Metagenome (Genes) at 1-2m
maternal_gene_12	2	K10961	1-2 months	-0.262739	0.0412002	Higher in Case	0.0108249	Maternal Fecal Metagenome (Genes) at 1-2m
maternal_gene_12	2	K14245	1-2 months	-0.150962	-0.0717026	Lower in Case	0.0108244	Maternal Fecal Metagenome (Genes) at 1-2m
maternal_gene_12	2	K16003	1-2 months	-0.139631	-0.0749463	Lower in Case	0.0104648	Maternal Fecal Metagenome (Genes) at 1-2m
maternal_gene_12	2	K16030	1-2 months	-0.143864	-0.0725306	Lower in Case	0.0104345	Maternal Fecal Metagenome (Genes) at 1-2m
maternal_gene_12	2	K23744	1-2 months	-0.177116	-0.0583301	Lower in Case	0.0103312	Maternal Fecal Metagenome (Genes) at 1-2m
maternal_gene_12	2	K23749	1-2 months	-0.138503	-0.0709086	Lower in Case	0.00982107	Maternal Fecal Metagenome (Genes) at 1-2m
maternal_gene_12	2	K24569	1-2 months	-0.110192	-0.0884761	Lower in Case	0.00974936	Maternal Fecal Metagenome (Genes) at 1-2m
maternal_gene_12	2	K23746	1-2 months	-0.121107	-0.0793328	Lower in Case	0.00960774	Maternal Fecal Metagenome (Genes) at 1-2m
maternal_gene_12	2	K24560	1-2 months	-0.0901848	-0.102781	Lower in Case	0.00926925	Maternal Fecal Metagenome (Genes) at 1-2m
maternal_gene_12	2	K16407	1-2 months	-0.138379	-0.0669252	Lower in Case	0.00926107	Maternal Fecal Metagenome (Genes) at 1-2m
maternal_gene_12	2	K16412	1-2 months	-0.131609	-0.0667439	Lower in Case	0.00878411	Maternal Fecal Metagenome (Genes) at 1-2m
maternal_gene_12	2	K21221	1-2 months	-0.118366	-0.0723	Lower in Case	0.00855784	Maternal Fecal Metagenome (Genes) at 1-2m
maternal_gene_12	2	K15416	1-2 months	-0.0963183	-0.0885376	Lower in Case	0.0085278	Maternal Fecal Metagenome (Genes) at 1-2m
maternal_gene_12	2	K16413	1-2 months	-0.129497	-0.065704	Lower in Case	0.00850847	Maternal Fecal Metagenome (Genes) at 1-2m
maternal_gene_12	2	K07133	1-2 months	-0.14294	-0.0558562	Lower in Case	0.00798411	Maternal Fecal Metagenome (Genes) at 1-2m
maternal_gene_12	2	K16000	1-2 months	-0.0867691	-0.0913059	Lower in Case	0.00792253	Maternal Fecal Metagenome (Genes) at 1-2m
maternal_gene_12	2	K23365	1-2 months	-0.103682	-0.0760167	Lower in Case	0.00788157	Maternal Fecal Metagenome (Genes) at 1-2m
maternal_gene_12	2	K24562	1-2 months	-0.0913345	-0.0849415	Lower in Case	0.00775809	Maternal Fecal Metagenome (Genes) at 1-2m
maternal_gene_12	2	K16419	1-2 months	-0.0729749	-0.0928815	Lower in Case	0.00677802	Maternal Fecal Metagenome (Genes) at 1-2m
maternal_gene_12	2	K24555	1-2 months	-0.0783207	-0.0854506	Lower in Case	0.00669255	Maternal Fecal Metagenome (Genes) at 1-2m
maternal_gene_12	2	K14371	1-2 months	-0.0669844	-0.0974276	Lower in Case	0.00652613	Maternal Fecal Metagenome (Genes) at 1-2m
maternal_gene_12	2	K24567	1-2 months	-0.0778689	-0.0825473	Lower in Case	0.00642787	Maternal Fecal Metagenome (Genes) at 1-2m
maternal_gene_12	2	K20984	1-2 months	-0.0552588	-0.109259	Lower in Case	0.00603755	Maternal Fecal Metagenome (Genes) at 1-2m
maternal_gene_12	2	K18788	1-2 months	-0.0559975	-0.105641	Lower in Case	0.00591561	Maternal Fecal Metagenome (Genes) at 1-2m
maternal_gene_12	2	K16406	1-2 months	-0.0614174	-0.0920119	Lower in Case	0.00565113	Maternal Fecal Metagenome (Genes) at 1-2m
maternal_gene_12	2	K16002	1-2 months	-0.0479202	-0.11171	Lower in Case	0.00535317	Maternal Fecal Metagenome (Genes) at 1-2m
maternal_gene_12	2	K24558	1-2 months	-0.0496573	-0.0978016	Lower in Case	0.00485657	Maternal Fecal Metagenome (Genes) at 1-2m
maternal_gene_12	2	K16398	1-2 months	-0.0436058	-0.109796	Lower in Case	0.00478772	Maternal Fecal Metagenome (Genes) at 1-2m
maternal_gene_12	2	K24568	1-2 months	-0.0479592	-0.088434	Lower in Case	0.00424123	Maternal Fecal Metagenome (Genes) at 1-2m
maternal_gene_12	2	K21573	1-2 months	-0.0625978	0.053089	Higher in Case	0.00332325	Maternal Fecal Metagenome (Genes) at 1-2m
maternal_gene_12	2	K21064	1-2 months	-0.039021	-0.0774128	Lower in Case	0.00302072	Maternal Fecal Metagenome (Genes) at 1-2m
maternal_gene_12	2	K02014	1-2 months	-0.450009	0.00559101	Higher in Case	0.002516	Maternal Fecal Metagenome (Genes) at 1-2m
maternal_gene_12	2	K02108	1-2 months	-0.0282467	-0.0681724	Lower in Case	0.00192564	Maternal Fecal Metagenome (Genes) at 1-2m
maternal_gene_12	2	K18583	1-2 months	-0.014917	-0.0936232	Lower in Case	0.00139657	Maternal Fecal Metagenome (Genes) at 1-2m
maternal_gene_12	2	K14418	1-2 months	-0.0114678	-0.0982847	Lower in Case	0.00112711	Maternal Fecal Metagenome (Genes) at 1-2m
maternal_gene_12	2	K22573	1-2 months	-0.00941953	-0.118948	Lower in Case	0.00112044	Maternal Fecal Metagenome (Genes) at 1-2m
maternal_gene_12	2	K21572	1-2 months	-0.0186345	0.0543268	Higher in Case	0.00101236	Maternal Fecal Metagenome (Genes) at 1-2m
maternal_gene_12	2	K24556	1-2 months	-0.00830415	-0.119288	Lower in Case	0.000990587	Maternal Fecal Metagenome (Genes) at 1-2m
maternal_gene_12	2	K01652	1-2 months	-0.0145905	-0.065197	Lower in Case	0.000951258	Maternal Fecal Metagenome (Genes) at 1-2m
maternal_gene_12	2	K23367	1-2 months	-0.00744438	-0.11636	Lower in Case	0.000866226	Maternal Fecal Metagenome (Genes) at 1-2m
maternal_gene_12	2	K06921	1-2 months	-0.042082	0.00919486	Higher in Case	0.000386938	Maternal Fecal Metagenome (Genes) at 1-2m
maternal_gene_12	2	K16396	1-2 months	-0.00333243	-0.103879	Lower in Case	0.000346171	Maternal Fecal Metagenome (Genes) at 1-2m
maternal_prot_dep_12	2	P04406	1-2 months	-0.543955	0.238702	Higher in Case	0.129843	Plasma Proteome (Depleted) at 1-2m
maternal_prot_dep_12	2	P60174	1-2 months	-0.394267	0.206481	Higher in Case	0.0814088	Plasma Proteome (Depleted) at 1-2m
maternal_prot_dep_12	2	P00338	1-2 months	-0.369333	0.160029	Higher in Case	0.0591041	Plasma Proteome (Depleted) at 1-2m
maternal_prot_dep_12	2	P37837	1-2 months	-0.294446	0.171664	Higher in Case	0.0505459	Plasma Proteome (Depleted) at 1-2m
maternal_prot_dep_12	2	P62937	1-2 months	-0.347626	0.127125	Higher in Case	0.0441919	Plasma Proteome (Depleted) at 1-2m
maternal_prot_dep_12	2	P00558	1-2 months	-0.288388	0.129446	Higher in Case	0.0373307	Plasma Proteome (Depleted) at 1-2m
maternal_prot_dep_12	2	P52209	1-2 months	-0.276461	0.12506	Higher in Case	0.0345743	Plasma Proteome (Depleted) at 1-2m
maternal_prot_dep_12	2	Q6ZVL6	1-2 months	-0.0809007	0.238641	Higher in Case	0.0193062	Plasma Proteome (Depleted) at 1-2m
maternal_prot_dep_12	2	P04003	1-2 months	0.0806268	-0.159347	Lower in Case	0.0128477	Plasma Proteome (Depleted) at 1-2m
maternal_prot_dep_12	2	Q86VB7	1-2 months	0.0486908	-0.209667	Lower in Case	0.0102088	Plasma Proteome (Depleted) at 1-2m
maternal_prot_dep_12	2	O75132	1-2 months	-0.109222	0.0896674	Higher in Case	0.00979362	Plasma Proteome (Depleted) at 1-2m
maternal_prot_dep_12	2	P08603	1-2 months	0.0669727	-0.140922	Lower in Case	0.00943794	Plasma Proteome (Depleted) at 1-2m
maternal_prot_dep_12	2	P08294	1-2 months	-0.0370717	0.163789	Higher in Case	0.00607195	Plasma Proteome (Depleted) at 1-2m
maternal_prot_dep_12	2	P41222	1-2 months	-0.0189594	0.256659	Higher in Case	0.00486611	Plasma Proteome (Depleted) at 1-2m
maternal_prot_dep_12	2	P03952	1-2 months	0.0457718	-0.104675	Lower in Case	0.00479116	Plasma Proteome (Depleted) at 1-2m
maternal_prot_dep_12	2	P08637	1-2 months	-0.0264308	0.122548	Higher in Case	0.00323904	Plasma Proteome (Depleted) at 1-2m
maternal_prot_dep_12	2	Q10588	1-2 months	-0.0506753	0.0571235	Higher in Case	0.00289475	Plasma Proteome (Depleted) at 1-2m
maternal_prot_dep_12	2	P06702	1-2 months	-0.064241	0.0369282	Higher in Case	0.0023723	Plasma Proteome (Depleted) at 1-2m
maternal_prot_dep_12	2	P00918	1-2 months	-0.0158957	0.122671	Higher in Case	0.00194994	Plasma Proteome (Depleted) at 1-2m
maternal_prot_dep_12	2	P06703	1-2 months	-0.0137885	0.132983	Higher in Case	0.00183364	Plasma Proteome (Depleted) at 1-2m
maternal_prot_dep_12	2	Q13670	1-2 months	0.0193871	-0.0741134	Lower in Case	0.00143684	Plasma Proteome (Depleted) at 1-2m
maternal_prot_dep_12	2	Q14624	1-2 months	0.030405	-0.0436474	Lower in Case	0.0013271	Plasma Proteome (Depleted) at 1-2m
maternal_prot_dep_12	2	P81605	1-2 months	-0.0163209	0.0653276	Higher in Case	0.00106621	Plasma Proteome (Depleted) at 1-2m
maternal_prot_dep_12	2	Q5VYJ5	1-2 months	0.00729008	-0.0685729	Lower in Case	0.000499902	Plasma Proteome (Depleted) at 1-2m
maternal_prot_dep_12	2	P00450	1-2 months	0.00186303	-0.0554263	Lower in Case	0.000103261	Plasma Proteome (Depleted) at 1-2m
maternal_prot_nav_12	2	P14618	1-2 months	-0.747795	0.168367	Higher in Case	0.125904	Plasma Proteome (Naive) at 1-2m
maternal_prot_nav_12	2	P51797	1-2 months	-0.18959	0.354073	Higher in Case	0.0671286	Plasma Proteome (Naive) at 1-2m
maternal_prot_nav_12	2	P17936	1-2 months	-0.265163	0.186614	Higher in Case	0.049483	Plasma Proteome (Naive) at 1-2m
maternal_prot_nav_12	2	P06727	1-2 months	-0.223079	0.185215	Higher in Case	0.0413175	Plasma Proteome (Naive) at 1-2m
maternal_prot_nav_12	2	P02749	1-2 months	-0.18032	0.154998	Higher in Case	0.0279492	Plasma Proteome (Naive) at 1-2m
maternal_prot_nav_12	2	P36955	1-2 months	-0.323283	0.0754232	Higher in Case	0.0243831	Plasma Proteome (Naive) at 1-2m
maternal_prot_nav_12	2	P51884	1-2 months	-0.141252	0.13743	Higher in Case	0.0194122	Plasma Proteome (Naive) at 1-2m
maternal_prot_nav_12	2	P01703	1-2 months	-0.0603803	0.253425	Higher in Case	0.0153019	Plasma Proteome (Naive) at 1-2m
maternal_prot_nav_12	2	Q5T5C0	1-2 months	-0.0831829	0.168336	Higher in Case	0.0140027	Plasma Proteome (Naive) at 1-2m
maternal_prot_nav_12	2	P02647	1-2 months	-0.124074	0.0980841	Higher in Case	0.0121696	Plasma Proteome (Naive) at 1-2m
maternal_prot_nav_12	2	Q6PGP7	1-2 months	-0.0623329	0.170842	Higher in Case	0.0106491	Plasma Proteome (Naive) at 1-2m
maternal_prot_nav_12	2	Q9N2J8	1-2 months	-0.139029	0.0738684	Higher in Case	0.0102698	Plasma Proteome (Naive) at 1-2m
maternal_prot_nav_12	2	Q00526	1-2 months	0.0712124	-0.133918	Lower in Case	0.00953659	Plasma Proteome (Naive) at 1-2m
maternal_prot_nav_12	2	Q8TF72	1-2 months	-0.0907277	0.102922	Higher in Case	0.00933788	Plasma Proteome (Naive) at 1-2m
maternal_prot_nav_12	2	P01599	1-2 months	0.0338623	-0.20522	Lower in Case	0.00694922	Plasma Proteome (Naive) at 1-2m
maternal_prot_nav_12	2	P29622	1-2 months	-0.0870231	0.0644464	Higher in Case	0.00560833	Plasma Proteome (Naive) at 1-2m
maternal_prot_nav_12	2	P11177	1-2 months	-0.121648	0.0448355	Higher in Case	0.00545416	Plasma Proteome (Naive) at 1-2m
maternal_prot_nav_12	2	A0A0A0MS15	1-2 months	-0.132728	0.0356749	Higher in Case	0.00473506	Plasma Proteome (Naive) at 1-2m
maternal_prot_nav_12	2	P01009	1-2 months	-0.0342829	0.11019	Higher in Case	0.00377764	Plasma Proteome (Naive) at 1-2m
maternal_prot_nav_12	2	P35858	1-2 months	-0.145011	0.00890973	Higher in Case	0.00129201	Plasma Proteome (Naive) at 1-2m
maternal_prot_nav_12	2	Q15166	1-2 months	-0.0141854	0.086406	Higher in Case	0.0012257	Plasma Proteome (Naive) at 1-2m
maternal_prot_nav_12	2	Q9H257	1-2 months	-0.0153592	0.072189	Higher in Case	0.00110877	Plasma Proteome (Naive) at 1-2m
maternal_prot_nav_12	2	P01008	1-2 months	-0.0139342	0.0639378	Higher in Case	0.000890921	Plasma Proteome (Naive) at 1-2m
maternal_prot_nav_12	2	P01024	1-2 months	-0.0253653	0.0339939	Higher in Case	0.000862266	Plasma Proteome (Naive) at 1-2m
maternal_prot_nav_12	2	Q9Y274	1-2 months	-0.0267069	0.0219	Higher in Case	0.000584882	Plasma Proteome (Naive) at 1-2m
maternal_taxa_12	2	CAG.103.sp900317855	1-2 months	-0.410757	0.256476	Higher in Case	0.105349	Maternal Fecal Microbiome (Taxa) at 1-2m
maternal_taxa_12	2	CAG.110.sp900540635	1-2 months	0.192621	-0.377998	Lower in Case	0.0728103	Maternal Fecal Microbiome (Taxa) at 1-2m
maternal_taxa_12	2	CAG.180.sp000432435	1-2 months	-0.304746	0.194209	Higher in Case	0.0591843	Maternal Fecal Microbiome (Taxa) at 1-2m
maternal_taxa_12	2	Prevotella.sp900552965	1-2 months	-0.281938	0.177807	Higher in Case	0.0501304	Maternal Fecal Microbiome (Taxa) at 1-2m
maternal_taxa_12	2	Prevotella.sp000434975	1-2 months	-0.232865	0.213819	Higher in Case	0.0497909	Maternal Fecal Microbiome (Taxa) at 1-2m
maternal_taxa_12	2	Parabacteroides.sp900549585	1-2 months	-0.374699	0.113234	Higher in Case	0.0424285	Maternal Fecal Microbiome (Taxa) at 1-2m
maternal_taxa_12	2	Unknown_Prevotella.6	1-2 months	-0.235119	0.176307	Higher in Case	0.041453	Maternal Fecal Microbiome (Taxa) at 1-2m
maternal_taxa_12	2	Succinivibrio.sp000431835	1-2 months	0.147855	-0.279343	Lower in Case	0.0413023	Maternal Fecal Microbiome (Taxa) at 1-2m
maternal_taxa_12	2	Unknown_RC9	1-2 months	-0.270521	0.142192	Higher in Case	0.0384659	Maternal Fecal Microbiome (Taxa) at 1-2m
maternal_taxa_12	2	RC9.sp000434935	1-2 months	-0.307555	0.0986539	Higher in Case	0.0303415	Maternal Fecal Microbiome (Taxa) at 1-2m
maternal_taxa_12	2	RC9.sp900546925	1-2 months	-0.219656	0.0910642	Higher in Case	0.0200028	Maternal Fecal Microbiome (Taxa) at 1-2m
maternal_taxa_12	2	CAG.110.sp900549705	1-2 months	0.0606456	-0.299237	Lower in Case	0.0181474	Maternal Fecal Microbiome (Taxa) at 1-2m
maternal_taxa_12	2	UBA7597.sp900542935	1-2 months	0.085326	-0.168165	Lower in Case	0.0143489	Maternal Fecal Microbiome (Taxa) at 1-2m
maternal_taxa_12	2	Prevotella.sp900546575	1-2 months	-0.0590163	0.239918	Higher in Case	0.0141591	Maternal Fecal Microbiome (Taxa) at 1-2m
maternal_taxa_12	2	Unknown_Gemmiger.2	1-2 months	-0.0826955	0.155591	Higher in Case	0.0128667	Maternal Fecal Microbiome (Taxa) at 1-2m
maternal_taxa_12	2	Unknown_Prevotella.12	1-2 months	-0.143522	0.0851792	Higher in Case	0.0122251	Maternal Fecal Microbiome (Taxa) at 1-2m
maternal_taxa_12	2	F23.B02.sp002472405	1-2 months	-0.117227	0.0898142	Higher in Case	0.0105286	Maternal Fecal Microbiome (Taxa) at 1-2m
maternal_taxa_12	2	Agathobacter.sp900543445	1-2 months	0.102922	-0.087815	Lower in Case	0.00903812	Maternal Fecal Microbiome (Taxa) at 1-2m
maternal_taxa_12	2	Prevotella.sp002251295	1-2 months	-0.13547	0.0652068	Higher in Case	0.00883358	Maternal Fecal Microbiome (Taxa) at 1-2m
maternal_taxa_12	2	Unknown_Bacteroides.2	1-2 months	0.0348835	-0.196065	Lower in Case	0.00683944	Maternal Fecal Microbiome (Taxa) at 1-2m
maternal_taxa_12	2	Unknown_UMGS1773	1-2 months	-0.0720161	0.0726896	Higher in Case	0.00523482	Maternal Fecal Microbiome (Taxa) at 1-2m
maternal_taxa_12	2	Parabacteroides.sp900155425	1-2 months	0.0395409	-0.126827	Lower in Case	0.00501485	Maternal Fecal Microbiome (Taxa) at 1-2m
maternal_taxa_12	2	Mitsuokella.multacida	1-2 months	0.156238	0.0202177	Higher in Case	0.00315877	Maternal Fecal Microbiome (Taxa) at 1-2m
maternal_taxa_12	2	Unknown_Slackia_A.2	1-2 months	-0.130485	0.0158999	Higher in Case	0.0020747	Maternal Fecal Microbiome (Taxa) at 1-2m
maternal_taxa_12	2	Prevotella.sp900548745	1-2 months	-0.00780539	0.115628	Higher in Case	0.000902525	Maternal Fecal Microbiome (Taxa) at 1-2m
milk_bioactive_1421	2	FSH	14-21 days	0.680326	-0.12381	Lower in Case	0.0842311	Milk Bioactive Proteins at 14-21d
milk_bioactive_1421	2	LH	14-21 days	0.696956	-0.0792506	Lower in Case	0.0552341	Milk Bioactive Proteins at 14-21d
milk_bioactive_1421	2	FGF-21	14-21 days	-0.226735	-0.0186019	Lower in Case	0.00421772	Milk Bioactive Proteins at 14-21d
milk_hmo_1421	2	DSLNT_nmol/mL	14-21 days	-0.736047	0.136854	Higher in Case	0.100731	Milk HMOs at 14-21d
milk_hmo_1421	2	LNT_nmol/mL	14-21 days	-0.618578	0.0458739	Higher in Case	0.0283766	Milk HMOs at 14-21d
milk_hmo_1421	2	LNFP III_nmol/mL	14-21 days	-0.241596	0.0362142	Higher in Case	0.00874919	Milk HMOs at 14-21d
milk_hmo_1421	2	LSTc_nmol/mL	14-21 days	-0.116673	0.0648878	Higher in Case	0.00757065	Milk HMOs at 14-21d
milk_hmo_1421	2	Sia_nmol/mL	14-21 days	-0.0601188	0.0744305	Higher in Case	0.00447468	Milk HMOs at 14-21d
milk_macro_micro_1421	2	PN	14-21 days	-0.77641	0.238264	Higher in Case	0.184991	Milk Macro- and Micronutrients at 14-21d
milk_macro_micro_1421	2	CARBOHYDRATE	14-21 days	0.432726	-0.168693	Lower in Case	0.0729978	Milk Macro- and Micronutrients at 14-21d
milk_macro_micro_1421	2	TMP	14-21 days	0.350398	-0.103749	Lower in Case	0.0363534	Milk Macro- and Micronutrients at 14-21d
milk_macro_micro_1421	2	B1	14-21 days	0.146282	-0.0612678	Lower in Case	0.00896235	Milk Macro- and Micronutrients at 14-21d
milk_macro_micro_1421	2	Mn	14-21 days	-0.220456	-0.0310475	Lower in Case	0.00684463	Milk Macro- and Micronutrients at 14-21d
milk_macro_micro_1421	2	TRP	14-21 days	-0.047027	0.120252	Higher in Case	0.00565509	Milk Macro- and Micronutrients at 14-21d
milk_macro_micro_1421	2	FAT	14-21 days	-0.0544604	0.039115	Higher in Case	0.00213022	Milk Macro- and Micronutrients at 14-21d
milk_macro_micro_1421	2	Na	14-21 days	-0.0202215	-0.0747596	Lower in Case	0.00151175	Milk Macro- and Micronutrients at 14-21d
milk_macro_micro_1421	2	PROTEIN	14-21 days	-0.0847099	-0.00695922	Lower in Case	0.000589515	Milk Macro- and Micronutrients at 14-21d
milk_macro_micro_1421	2	NMN	14-21 days	0.0662999	-0.00242831	Lower in Case	0.000160997	Milk Macro- and Micronutrients at 14-21d
milk_metabolome_1421	2	rLC_pos_mtb_1287015	14-21 days	-0.462835	0.302444	Higher in Case	0.139981	Milk Metabolome at 14-21d	563.934	99	positive
milk_metabolome_1421	2	rLC_neg_mtb_1619768	14-21 days	-0.286757	0.271568	Higher in Case	0.0778741	Milk Metabolome at 14-21d	202.072	112	negative	E1263;E1374	C01074;C00645;C00140;C05548	N-Acetylgalactosamine; N-Acetylchondrosamine; 2-Acetamido-2-deoxygalactose; GalNAc$N-Acetyl-D-mannosamine; 2-Acetamido-2-deoxy-D-mannose$N-Acetyl-D-glucosamine;6-Acetamido-2-oxohexanoate; 2-Oxo-6-acetamidocaproate
milk_metabolome_1421	2	rLC_pos_mtb_1432823	14-21 days	-0.259009	0.234724	Higher in Case	0.0607958	Milk Metabolome at 14-21d	105.111	107	positive
milk_metabolome_1421	2	rLC_neg_mtb_2652431	14-21 days	-0.429291	0.129907	Higher in Case	0.0557678	Milk Metabolome at 14-21d	1122.92	207	negative
milk_metabolome_1421	2	rLC_neg_mtb_4158835	14-21 days	-0.214101	0.220928	Higher in Case	0.047301	Milk Metabolome at 14-21d	623.668	314	negative
milk_metabolome_1421	2	rLC_neg_mtb_4192757	14-21 days	-0.214283	0.187075	Higher in Case	0.040087	Milk Metabolome at 14-21d	663.186	316	negative
milk_metabolome_1421	2	rLC_neg_mtb_4286844	14-21 days	-0.236739	0.16173	Higher in Case	0.0382878	Milk Metabolome at 14-21d	645.716	318	negative
milk_metabolome_1421	2	rLC_neg_mtb_1430678	14-21 days	0.120993	-0.312789	Lower in Case	0.0378453	Milk Metabolome at 14-21d	1403.47	103	negative
milk_metabolome_1421	2	rLC_neg_mtb_2703592	14-21 days	-0.178692	0.19608	Higher in Case	0.035038	Milk Metabolome at 14-21d	365.031	203	negative
milk_metabolome_1421	2	rLC_pos_mtb_4353031	14-21 days	-0.122731	0.250387	Higher in Case	0.0307301	Milk Metabolome at 14-21d	748.531	302	positive
milk_metabolome_1421	2	rLC_neg_mtb_8375318	14-21 days	0.101229	-0.211778	Lower in Case	0.021438	Milk Metabolome at 14-21d	697.543	606	negative
milk_metabolome_1421	2	rLC_neg_mtb_4312754	14-21 days	-0.297795	0.0711198	Higher in Case	0.0211791	Milk Metabolome at 14-21d	648.206	316	negative
milk_metabolome_1421	2	rLC_pos_mtb_2763497	14-21 days	-0.13974	0.14106	Higher in Case	0.0197117	Milk Metabolome at 14-21d	950.337	192	positive
milk_metabolome_1421	2	rLC_neg_mtb_1613586	14-21 days	-0.135208	0.134651	Higher in Case	0.0182058	Milk Metabolome at 14-21d	1414.49	116	negative
milk_metabolome_1421	2	rLC_neg_mtb_1600458	14-21 days	-0.116027	0.154754	Higher in Case	0.0179557	Milk Metabolome at 14-21d	646.218	114	negative
milk_metabolome_1421	2	rLC_pos_mtb_1678505	14-21 days	-0.130032	0.114077	Higher in Case	0.0148336	Milk Metabolome at 14-21d	730.239	118	positive	E10	m2mn	(alpha-D-mannosyl)2-beta-D-mannosyl-N-acetylglucosamine
milk_metabolome_1421	2	rLC_neg_mtb_2592355	14-21 days	-0.0966403	0.152579	Higher in Case	0.0147452	Milk Metabolome at 14-21d	815.016	203	negative
milk_metabolome_1421	2	rLC_pos_mtb_4680800	14-21 days	-0.0718718	0.182102	Higher in Case	0.013088	Milk Metabolome at 14-21d	750.544	316	positive
milk_metabolome_1421	2	rLC_pos_mtb_3998607	14-21 days	-0.0478962	0.236348	Higher in Case	0.0113202	Milk Metabolome at 14-21d	1165.74	275	positive
milk_metabolome_1421	2	rLC_neg_mtb_1384198	14-21 days	-0.11037	0.0814687	Higher in Case	0.00899166	Milk Metabolome at 14-21d	1621.54	105	negative
milk_metabolome_1421	2	rLC_neg_mtb_6823454	14-21 days	0.0556507	-0.148795	Lower in Case	0.00828056	Milk Metabolome at 14-21d	752.496	502	negative
milk_metabolome_1421	2	rLC_neg_mtb_169562	14-21 days	-0.101466	0.0810367	Higher in Case	0.00822247	Milk Metabolome at 14-21d	579.025	14	negative	E1397	C00167	UDP-D-glucuronate
milk_metabolome_1421	2	rLC_neg_mtb_1583424	14-21 days	0.046751	-0.173398	Lower in Case	0.00810651	Milk Metabolome at 14-21d	1201.43	0.12	negative
milk_metabolome_1421	2	rLC_pos_mtb_1228946	14-21 days	-0.0542357	0.115909	Higher in Case	0.00628638	Milk Metabolome at 14-21d	270.002	95	positive
milk_metabolome_1421	2	rLC_pos_mtb_1408903	14-21 days	-0.0610785	0.0995817	Higher in Case	0.0060823	Milk Metabolome at 14-21d	466.953	99	positive
milk_metabolome_1421	2	rLC_neg_mtb_4562919	14-21 days	-0.0356781	0.147557	Higher in Case	0.00526456	Milk Metabolome at 14-21d	311.222	345	negative	E1489	C04717;C14827	(9Z,11E)-(13S)-13-Hydroperoxyoctadeca-9,11-dienoic acid; (9Z,11E)-(13S)-13-Hydroperoxyoctadeca-9,11-dienoate; 13(S)-HPODE; 13S-Hydroperoxy-9Z,11E-octadecadienoic acid$9(S)-HPODE; 9(S)-HPOD; (10E,12Z)-(9S)-9-Hydroperoxyoctadeca-10,12-dienoic acid
milk_metabolome_1421	2	rLC_pos_mtb_6060543	14-21 days	0.0364874	-0.144207	Lower in Case	0.00526174	Milk Metabolome at 14-21d	618.517	403	positive
milk_metabolome_1421	2	rLC_pos_mtb_1266746	14-21 days	-0.0513643	0.0942337	Higher in Case	0.00484025	Milk Metabolome at 14-21d	890.944	99	positive
milk_metabolome_1421	2	rLC_pos_mtb_5044706	14-21 days	-0.0395553	0.120695	Higher in Case	0.00477411	Milk Metabolome at 14-21d	774.543	343	positive
milk_metabolome_1421	2	rLC_neg_mtb_2419627	14-21 days	-0.068129	0.0585785	Higher in Case	0.0039909	Milk Metabolome at 14-21d	634.208	194	negative
milk_metabolome_1421	2	rLC_neg_mtb_6452647	14-21 days	0.0387716	-0.0881754	Lower in Case	0.00341871	Milk Metabolome at 14-21d	754.456	475	negative
milk_metabolome_1421	2	rLC_neg_mtb_2613556	14-21 days	-0.0231574	0.132642	Higher in Case	0.00307164	Milk Metabolome at 14-21d	467.075	0.2	negative
milk_metabolome_1421	2	rLC_neg_mtb_4297883	14-21 days	-0.0174027	0.171542	Higher in Case	0.0029853	Milk Metabolome at 14-21d	1288.43	0.32	negative
milk_metabolome_1421	2	rLC_neg_mtb_2216871	14-21 days	-0.0179475	0.153695	Higher in Case	0.00275844	Milk Metabolome at 14-21d	385.071	167	negative
milk_metabolome_1421	2	rLC_neg_mtb_2593859	14-21 days	-0.0285382	0.0950687	Higher in Case	0.00271309	Milk Metabolome at 14-21d	912.991	0.2	negative
milk_metabolome_1421	2	rLC_neg_mtb_6511573	14-21 days	-0.0169488	0.159265	Higher in Case	0.00269935	Milk Metabolome at 14-21d	585.357	479	negative
milk_metabolome_1421	2	rLC_neg_mtb_4292800	14-21 days	-0.0742458	0.0346699	Higher in Case	0.00257409	Milk Metabolome at 14-21d	997.334	314	negative
milk_metabolome_1421	2	rLC_pos_mtb_3035553	14-21 days	0.0131388	-0.18843	Lower in Case	0.00247575	Milk Metabolome at 14-21d	438.377	213	positive
milk_metabolome_1421	2	rLC_neg_mtb_1756771	14-21 days	0.0098258	-0.231674	Lower in Case	0.00227638	Milk Metabolome at 14-21d	448.153	134	negative
milk_metabolome_1421	2	rLC_neg_mtb_2710508	14-21 days	-0.0133065	0.169852	Higher in Case	0.00226015	Milk Metabolome at 14-21d	846.959	217	negative
milk_metabolome_1421	2	rLC_neg_mtb_2620866	14-21 days	-0.0221173	0.101796	Higher in Case	0.00225146	Milk Metabolome at 14-21d	896.019	203	negative
milk_metabolome_1421	2	rLC_neg_mtb_2561876	14-21 days	-0.0166845	0.130144	Higher in Case	0.00217138	Milk Metabolome at 14-21d	571.062	0.2	negative
milk_metabolome_1421	2	rLC_neg_mtb_2539798	14-21 days	-0.0204897	0.102265	Higher in Case	0.00209538	Milk Metabolome at 14-21d	717.043	0.2	negative
milk_metabolome_1421	2	rLC_neg_mtb_2621142	14-21 days	-0.0212686	0.0949381	Higher in Case	0.0020192	Milk Metabolome at 14-21d	911.994	203	negative
milk_metabolome_1421	2	rLC_neg_mtb_2597652	14-21 days	-0.0203955	0.0947275	Higher in Case	0.00193201	Milk Metabolome at 14-21d	1157	205	negative
milk_metabolome_1421	2	rLC_neg_mtb_5174810	14-21 days	0.0169693	-0.0918169	Lower in Case	0.00155807	Milk Metabolome at 14-21d	613.139	372	negative	E3847	C00128	CMP-N-acetylneuraminate
milk_metabolome_1421	2	rLC_neg_mtb_1479663	14-21 days	-0.021363	-0.0540351	Lower in Case	0.00115436	Milk Metabolome at 14-21d	1449.46	112	negative
milk_metabolome_1421	2	rLC_neg_mtb_1183648	14-21 days	-0.00162771	0.121895	Higher in Case	0.00019841	Milk Metabolome at 14-21d	1031.32	93	negative	E2264	C05261	3-Oxotetradecanoyl-CoA
milk_metabolome_1421	2	rLC_neg_mtb_1375190	14-21 days	-0.00565592	0.0144203	Higher in Case	8.156e-05	Milk Metabolome at 14-21d	834.152	0.11	negative
milk_metabolome_1421	2	rLC_neg_mtb_1339920	14-21 days	-0.0199007	-0.00344442	Lower in Case	6.85463e-05	Milk Metabolome at 14-21d	343.019	105	negative	E1285	C00055	CMP
milk_targeted_1421	2	Choline	14-21 days	-0.677438	0.240725	Higher in Case	0.163076	Milk Targeted Metabolites at 14-21d
milk_targeted_1421	2	Gln	14-21 days	0.388285	-0.220773	Lower in Case	0.0857231	Milk Targeted Metabolites at 14-21d
milk_targeted_1421	2	Ser	14-21 days	0.309806	-0.271861	Lower in Case	0.0842242	Milk Targeted Metabolites at 14-21d
milk_targeted_1421	2	Glu	14-21 days	0.293003	-0.224391	Lower in Case	0.0657474	Milk Targeted Metabolites at 14-21d
milk_targeted_1421	2	TG.20.2_32.1.	14-21 days	-0.218754	0.184449	Higher in Case	0.0403491	Milk Targeted Metabolites at 14-21d
milk_targeted_1421	2	H1	14-21 days	0.227158	-0.11247	Lower in Case	0.0255484	Milk Targeted Metabolites at 14-21d
milk_targeted_1421	2	TG.17.1_32.1.	14-21 days	-0.162495	0.156909	Higher in Case	0.0254969	Milk Targeted Metabolites at 14-21d
milk_targeted_1421	2	TG.20.1_32.2.	14-21 days	-0.113902	0.21474	Higher in Case	0.0244593	Milk Targeted Metabolites at 14-21d
milk_targeted_1421	2	TG.20.3_32.1.	14-21 days	-0.0891149	0.225103	Higher in Case	0.0200601	Milk Targeted Metabolites at 14-21d
milk_targeted_1421	2	TG.18.1_32.2.	14-21 days	-0.111984	0.163788	Higher in Case	0.0183417	Milk Targeted Metabolites at 14-21d
milk_targeted_1421	2	TG.18.2_32.1.	14-21 days	-0.100934	0.170424	Higher in Case	0.0172015	Milk Targeted Metabolites at 14-21d
milk_targeted_1421	2	TG.14.0_36.3.	14-21 days	-0.104685	0.158071	Higher in Case	0.0165477	Milk Targeted Metabolites at 14-21d
milk_targeted_1421	2	TG.14.0_38.4.	14-21 days	-0.0692367	0.183079	Higher in Case	0.0126758	Milk Targeted Metabolites at 14-21d
milk_targeted_1421	2	Gly	14-21 days	0.0472902	-0.254591	Lower in Case	0.0120396	Milk Targeted Metabolites at 14-21d
milk_targeted_1421	2	TG.20.4_32.1.	14-21 days	-0.0792248	0.145843	Higher in Case	0.0115544	Milk Targeted Metabolites at 14-21d
milk_targeted_1421	2	TG.16.1_38.3.	14-21 days	-0.0497805	0.181162	Higher in Case	0.0090183	Milk Targeted Metabolites at 14-21d
milk_targeted_1421	2	C3	14-21 days	-0.0699741	0.108221	Higher in Case	0.00757266	Milk Targeted Metabolites at 14-21d
milk_targeted_1421	2	TG.22.4_32.2.	14-21 days	-0.0459394	0.139641	Higher in Case	0.00641504	Milk Targeted Metabolites at 14-21d
milk_targeted_1421	2	TG.17.0_32.1.	14-21 days	-0.0608259	0.0877702	Higher in Case	0.0053387	Milk Targeted Metabolites at 14-21d
milk_targeted_1421	2	TG.16.1_32.2.	14-21 days	-0.0256631	0.157876	Higher in Case	0.00405158	Milk Targeted Metabolites at 14-21d
milk_targeted_1421	2	PC.ae.C40.6	14-21 days	-0.0201809	0.157289	Higher in Case	0.00317423	Milk Targeted Metabolites at 14-21d
milk_targeted_1421	2	Ala	14-21 days	0.0166028	-0.153425	Lower in Case	0.00254728	Milk Targeted Metabolites at 14-21d
milk_targeted_1421	2	TG.14.0_38.5.	14-21 days	-0.00819985	0.180475	Higher in Case	0.00147987	Milk Targeted Metabolites at 14-21d
milk_targeted_1421	2	X1.Met.His	14-21 days	0.0103317	-0.0744416	Lower in Case	0.000769105	Milk Targeted Metabolites at 14-21d
milk_targeted_1421	2	TG.18.2_30.1.	14-21 days	-0.00367289	0.14962	Higher in Case	0.000549537	Milk Targeted Metabolites at 14-21d
milk_taxa_1421	2	Pauljensenia.sp1	14-21 days	-0.495056	0.221609	Higher in Case	0.109709	Milk Microbiome at 14-21d
milk_taxa_1421	2	Unclassified.Quadrisphaeraceae.sp5	14-21 days	-0.494528	0.221788	Higher in Case	0.10968	Milk Microbiome at 14-21d
milk_taxa_1421	2	Micromonospora_H_372070.sp5	14-21 days	-0.492912	0.222184	Higher in Case	0.109517	Milk Microbiome at 14-21d
milk_taxa_1421	2	Dorea_A.longicatena	14-21 days	-0.335807	0.312549	Higher in Case	0.104956	Milk Microbiome at 14-21d
milk_taxa_1421	2	Thauera_A_597130.chlorobenzoica	14-21 days	-0.197075	0.208461	Higher in Case	0.0410825	Milk Microbiome at 14-21d
milk_taxa_1421	2	Unclassified.Enterobacteriaceae_A.sp5	14-21 days	-0.195362	0.156577	Higher in Case	0.0305891	Milk Microbiome at 14-21d
milk_taxa_1421	2	Actinoplanes.sp7	14-21 days	-0.0666655	0.313088	Higher in Case	0.0208722	Milk Microbiome at 14-21d
milk_taxa_1421	2	Vaginella.massiliensis.1	14-21 days	-0.168587	0.107222	Higher in Case	0.0180763	Milk Microbiome at 14-21d
milk_taxa_1421	2	Acinetobacter.baumannii.2	14-21 days	-0.155281	0.0732501	Higher in Case	0.0113744	Milk Microbiome at 14-21d
milk_taxa_1421	2	Modestobacter.roseus	14-21 days	-0.0339098	0.315194	Higher in Case	0.0106882	Milk Microbiome at 14-21d
milk_taxa_1421	2	Veillonella_A.sp42	14-21 days	-0.0264729	0.310626	Higher in Case	0.00822317	Milk Microbiome at 14-21d
milk_taxa_1421	2	Leucobacter.holotrichiae	14-21 days	-0.0350469	0.221061	Higher in Case	0.00774751	Milk Microbiome at 14-21d
milk_taxa_1421	2	Actinomyces.sp4	14-21 days	-0.0347706	0.221337	Higher in Case	0.007696	Milk Microbiome at 14-21d
milk_taxa_1421	2	Leuconostoc_B.sp3	14-21 days	-0.0592517	0.111369	Higher in Case	0.00659877	Milk Microbiome at 14-21d
milk_taxa_1421	2	Bifidobacterium.leopoldii	14-21 days	-0.0475045	0.123303	Higher in Case	0.00585743	Milk Microbiome at 14-21d
milk_taxa_1421	2	Mesobacillus_A_295502.sp1	14-21 days	-0.0246532	0.209552	Higher in Case	0.00516613	Milk Microbiome at 14-21d
milk_taxa_1421	2	Deinococcus_B.radiophilus.1	14-21 days	-0.0424719	0.117757	Higher in Case	0.00500137	Milk Microbiome at 14-21d
milk_taxa_1421	2	Romboutsia_B.ilealis	14-21 days	-0.028655	0.106464	Higher in Case	0.00305073	Milk Microbiome at 14-21d
milk_taxa_1421	2	Bifidobacterium.vaginale	14-21 days	-0.0840875	0.0265309	Higher in Case	0.00223092	Milk Microbiome at 14-21d
milk_taxa_1421	2	Unclassified.Planococcaceae.sp3	14-21 days	-0.00826146	0.111707	Higher in Case	0.000922866	Milk Microbiome at 14-21d
milk_taxa_1421	2	Bacillus_J.thermoamylovorans	14-21 days	-0.00678012	0.0854484	Higher in Case	0.00057935	Milk Microbiome at 14-21d
milk_taxa_1421	2	Weissella_A_338544.sp7	14-21 days	-0.00358837	0.135825	Higher in Case	0.000487392	Milk Microbiome at 14-21d
milk_taxa_1421	2	Rothia.terrae.1	14-21 days	-0.00292754	0.112475	Higher in Case	0.000329274	Milk Microbiome at 14-21d
milk_taxa_1421	2	Dermabacter.vaginalis.1	14-21 days	-0.00513151	0.0437896	Higher in Case	0.000224707	Milk Microbiome at 14-21d
milk_taxa_1421	2	Neisseria_563205.sp6	14-21 days	-0.0113581	0.0152663	Higher in Case	0.000173395	Milk Microbiome at 14-21d

## Sheet: haz_mixed_models_early
comp	block	feature	score	n_obs	n_id	beta_feature	conf.low	conf.high	p_feature	beta_int	p_int	p_feature_fdr	p_int_fdr	block_label
1	maternal_taxa_12	Unknown_CAG.170.2	0.148968	1191	141	0.164256	0.00885359	0.319659	0.0384531	0.0564086	0.729231	0.204445	0.909579	Maternal Fecal Microbiome (Taxa) at 1-2m
1	milk_hmo_1421	Fuc_nmol/mL	0.145384	2292	275	0.0186985	-0.0934038	0.130801	0.742884	0.0807444	0.546922	0.877575	0.893563	Milk HMOs at 14-21d
1	milk_hmo_1421	DFLNT_nmol/mL	0.129868	2292	275	-0.116331	-0.227613	-0.00504975	0.0405364	-0.151846	0.239908	0.204445	0.600302	Milk HMOs at 14-21d
1	maternal_gene_12	K03556	0.109217	1191	141	0.138762	-0.0157992	0.293324	0.0780802	0.340905	0.0785733	0.283041	0.327342	Maternal Fecal Metagenome (Genes) at 1-2m
1	maternal_prot_nav_12	P15814	0.0902546	1217	144	0.0673899	-0.0915559	0.226336	0.403392	-0.0339023	0.8841	0.649909	0.986939	Plasma Proteome (Naive) at 1-2m
1	milk_metabolome_1421	rLC_neg_mtb_1325213	0.086523	2292	275	-0.139806	-0.250927	-0.0286851	0.0138575	-0.0168915	0.890573	0.187381	0.986939	Milk Metabolome at 14-21d
1	maternal_gene_12	K21839	0.0852785	1191	141	0.121946	-0.0322978	0.276189	0.1203	0.296914	0.115428	0.367483	0.42099	Maternal Fecal Metagenome (Genes) at 1-2m
1	milk_taxa_1421	Exiguobacterium_A.sp2	0.0830208	1575	188	-0.102722	-0.237198	0.0317533	0.133522	-0.165863	0.434653	0.37777	0.787808	Milk Microbiome at 14-21d
1	maternal_taxa_12	CAG.170.sp003516765	0.0825933	1191	141	0.108519	-0.0480493	0.265088	0.172793	0.212307	0.187606	0.424044	0.567469	Maternal Fecal Microbiome (Taxa) at 1-2m
1	maternal_gene_12	3005008	0.0783953	1191	141	0.0402144	-0.115342	0.195771	0.610093	0.443729	0.0238478	0.813457	0.284733	Maternal Fecal Metagenome (Genes) at 1-2m
1	milk_macro_micro_1421	Cu	0.0771238	2232	268	-0.102156	-0.212654	0.00834276	0.0698433	0.0612229	0.723887	0.28034	0.909579	Milk Macro- and Micronutrients at 14-21d
1	milk_hmo_1421	DFLac_nmol/mL	0.0757149	2292	275	-0.0182319	-0.130901	0.094437	0.750299	0.00406227	0.97258	0.877575	0.989643	Milk HMOs at 14-21d
1	milk_targeted_1421	HexCer.d18.2.22.0.	0.0751407	2292	275	-0.116132	-0.226955	-0.00530969	0.0400562	0.231769	0.0490919	0.204445	0.284733	Milk Targeted Metabolites at 14-21d
1	maternal_prot_nav_12	Q9NXZ2	0.0736405	1217	144	-0.0849256	-0.237713	0.0678618	0.27375	0.168295	0.321292	0.538221	0.677635	Plasma Proteome (Naive) at 1-2m
1	maternal_prot_dep_12	P01040	0.0674256	1217	144	-0.08923	-0.244647	0.066187	0.258335	-0.208934	0.268265	0.525733	0.600302	Plasma Proteome (Depleted) at 1-2m
1	infant_gene_12	K01915	0.0669428	1191	141	-0.00337079	-0.160808	0.154067	0.966297	-0.328046	0.0580714	0.984055	0.306195	Infant Fecal Metagenome (Genes) at 1-2m
1	maternal_taxa_12	Unknown_Oscillospiraceae.16	0.0662275	1191	141	-0.0159687	-0.173204	0.141267	0.841163	0.116643	0.606699	0.942005	0.904579	Maternal Fecal Microbiome (Taxa) at 1-2m
1	maternal_gene_12	K22362	0.06483	1191	141	0.135773	-0.0183024	0.289848	0.083672	0.442963	0.0219495	0.29412	0.284733	Maternal Fecal Metagenome (Genes) at 1-2m
1	maternal_taxa_12	UBA1777.sp900549645	0.0646609	1191	141	-0.00142356	-0.158786	0.155939	0.985756	-0.01151	0.953358	0.987021	0.987406	Maternal Fecal Microbiome (Taxa) at 1-2m
1	maternal_taxa_12	Unknown_Roseburia.7	0.0642621	1191	141	0.077286	-0.0777659	0.232338	0.326109	-0.0904795	0.58694	0.573805	0.904579	Maternal Fecal Microbiome (Taxa) at 1-2m
1	maternal_prot_dep_12	P15169	0.0640363	1217	144	0.146822	-0.00943591	0.30308	0.0653219	0.423398	0.0106635	0.28034	0.206161	Plasma Proteome (Depleted) at 1-2m
1	milk_bioactive_1421	Insulin	0.061042	2292	275	-0.0495386	-0.162618	0.0635408	0.389199	0.0136855	0.9135	0.635875	0.987406	Milk Bioactive Proteins at 14-21d
1	maternal_prot_dep_12	P36980	0.0593738	1217	144	0.0188562	-0.136522	0.174235	0.810768	-0.0231209	0.89335	0.931179	0.986939	Plasma Proteome (Depleted) at 1-2m
1	infant_gene_12	K20419	0.059149	1191	141	-0.0121155	-0.169722	0.145491	0.879426	-0.326406	0.0688335	0.961042	0.318595	Infant Fecal Metagenome (Genes) at 1-2m
1	milk_metabolome_1421	rLC_pos_mtb_710808	0.0577978	2292	275	-0.154658	-0.266158	-0.0431577	0.0067304	-0.141598	0.235467	0.169139	0.600302	Milk Metabolome at 14-21d
1	milk_metabolome_1421	rLC_neg_mtb_4060942	0.0572041	2292	275	0.0860937	-0.0257822	0.19797	0.130935	0.19077	0.182555	0.37777	0.567469	Milk Metabolome at 14-21d
1	milk_bioactive_1421	IgA	0.0563762	2292	275	-0.0577882	-0.167976	0.0524	0.302772	0.0393131	0.725876	0.565571	0.909579	Milk Bioactive Proteins at 14-21d
1	milk_taxa_1421	Rothia.sp001808955.14	0.0553182	1575	188	0.0323591	-0.101129	0.165848	0.633066	-0.00122244	0.993552	0.822658	0.993552	Milk Microbiome at 14-21d
1	milk_metabolome_1421	rLC_neg_mtb_1354390	0.0534911	2292	275	-0.163939	-0.274288	-0.0535905	0.00373514	-0.0470409	0.702658	0.169139	0.909579	Milk Metabolome at 14-21d
1	milk_metabolome_1421	rLC_neg_mtb_1272690	0.0516685	2292	275	-0.150519	-0.262371	-0.0386676	0.00853585	-0.0795536	0.492686	0.169139	0.822327	Milk Metabolome at 14-21d
1	milk_taxa_1421	Unclassified.Micrococcaceae.sp12	0.0512419	1575	188	-0.0393822	-0.175861	0.0970963	0.56987	0.155308	0.269101	0.768662	0.600302	Milk Microbiome at 14-21d
1	maternal_gene_12	K23493	0.0504083	1191	141	0.14022	-0.0133269	0.293767	0.0731538	0.346809	0.0693502	0.28034	0.318595	Maternal Fecal Metagenome (Genes) at 1-2m
1	infant_gene_12	K03496	0.0502257	1191	141	0.0390133	-0.117498	0.195524	0.622927	-0.190021	0.259845	0.821131	0.600302	Infant Fecal Metagenome (Genes) at 1-2m
1	maternal_prot_nav_12	Q5T5C0	0.0492802	1217	144	-0.0524902	-0.204829	0.0998483	0.49694	-0.0236108	0.885191	0.729684	0.986939	Plasma Proteome (Naive) at 1-2m
1	infant_gene_12	K03527	0.0492258	1191	141	-0.0113467	-0.168192	0.145499	0.886479	-0.259056	0.119764	0.961042	0.42099	Infant Fecal Metagenome (Genes) at 1-2m
1	milk_targeted_1421	TG.20.3_32.2.	0.0474422	2292	275	-0.111114	-0.221993	-0.000235731	0.0495183	0.148697	0.227625	0.220928	0.600302	Milk Targeted Metabolites at 14-21d
1	milk_targeted_1421	TG.18.0_32.0.	0.0398293	2292	275	0.0583812	-0.0537045	0.170467	0.306081	0.309812	0.0139314	0.565571	0.230863	Milk Targeted Metabolites at 14-21d
1	infant_gene_12	K02355	0.0396033	1191	141	-0.00400353	-0.161269	0.153262	0.959932	-0.369127	0.0254798	0.984055	0.284733	Infant Fecal Metagenome (Genes) at 1-2m
1	milk_macro_micro_1421	Mo	0.038237	2232	268	-0.0175021	-0.128532	0.0935282	0.75653	0.0110683	0.928783	0.877575	0.987406	Milk Macro- and Micronutrients at 14-21d
1	milk_macro_micro_1421	K	0.0381867	2232	268	0.039522	-0.0727223	0.151766	0.488751	-0.00923072	0.949414	0.72686	0.987406	Milk Macro- and Micronutrients at 14-21d
1	milk_taxa_1421	Turicibacter.sanguinis	0.0347588	1575	188	-0.0465406	-0.184611	0.0915293	0.506885	0.197952	0.924341	0.732001	0.987406	Milk Microbiome at 14-21d
1	milk_macro_micro_1421	PLP	0.0342825	2259	271	0.0344029	-0.0784562	0.147262	0.548914	-0.0112039	0.925434	0.760249	0.987406	Milk Macro- and Micronutrients at 14-21d
1	maternal_prot_nav_12	O14975	0.0279946	1217	144	-0.0729242	-0.228766	0.0829175	0.356549	0.0704223	0.721458	0.590853	0.909579	Plasma Proteome (Naive) at 1-2m
1	maternal_prot_nav_12	P04083	0.0275837	1217	144	-0.0929125	-0.246679	0.0608543	0.234309	-0.0295723	0.866683	0.525733	0.986939	Plasma Proteome (Naive) at 1-2m
1	maternal_prot_dep_12	P09871	0.0275778	1217	144	0.164691	0.0107872	0.318595	0.0361428	0.212425	0.195151	0.204445	0.567469	Plasma Proteome (Depleted) at 1-2m
1	milk_taxa_1421	Unclassified.Enterobacteriaceae_A.sp17	0.0264718	1575	188	-0.00350035	-0.13685	0.129849	0.958758	0.0863114	0.66848	0.984055	0.909579	Milk Microbiome at 14-21d
1	milk_targeted_1421	CE.18.2.	0.0254883	2292	275	0.0447332	-0.0664543	0.155921	0.429032	0.0492789	0.682046	0.668923	0.909579	Milk Targeted Metabolites at 14-21d
1	milk_targeted_1421	DG.18.1_20.3.	0.0234196	2292	275	-0.00653222	-0.119972	0.106908	0.909828	0.127758	0.267956	0.968257	0.600302	Milk Targeted Metabolites at 14-21d
1	milk_macro_micro_1421	Se	0.0190383	2232	268	-0.0352864	-0.144333	0.0737605	0.524608	0.163556	0.216087	0.742128	0.596811	Milk Macro- and Micronutrients at 14-21d
1	maternal_prot_dep_12	A8MT70	0.0134829	1217	144	-0.0150234	-0.174651	0.144604	0.852677	-0.554038	0.428931	0.942005	0.787808	Plasma Proteome (Depleted) at 1-2m
1	milk_bioactive_1421	FGF-21	0.00900967	2292	275	-0.065434	-0.178781	0.0479127	0.256744	-0.515304	0.00337886	0.525733	0.110027	Milk Bioactive Proteins at 14-21d
1	infant_taxa_12	Unknown_LC.2	0.00860283	1191	141	0.025009	-0.13208	0.182098	0.753424	0.334619	0.0466892	0.877575	0.284733	Infant Fecal Microbiome (Taxa) at 1-2m
1	infant_taxa_12	Methanobrevibacter_A.smithii	0.00860283	1191	141	0.025009	-0.13208	0.182098	0.753424	0.334619	0.0466892	0.877575	0.284733	Infant Fecal Microbiome (Taxa) at 1-2m
1	infant_taxa_12	Methanosphaera.stadtmanae	0.00860283	1191	141	0.025009	-0.13208	0.182098	0.753424	0.334619	0.0466892	0.877575	0.284733	Infant Fecal Microbiome (Taxa) at 1-2m
1	infant_taxa_12	MX.02.sp006954405	0.00860283	1191	141	0.025009	-0.13208	0.182098	0.753424	0.334619	0.0466892	0.877575	0.284733	Infant Fecal Microbiome (Taxa) at 1-2m
1	infant_taxa_12	Methanomethylophilus.alvus	0.00860283	1191	141	0.025009	-0.13208	0.182098	0.753424	0.334619	0.0466892	0.877575	0.284733	Infant Fecal Microbiome (Taxa) at 1-2m
1	milk_hmo_1421	2'FL_nmol/mL	0.00188383	2292	275	0.0778011	-0.0337132	0.189316	0.170724	0.249975	0.0790137	0.424044	0.327342	Milk HMOs at 14-21d
1	milk_hmo_1421	Secretor	0.00174458	2292	275	0.0665135	-0.0450899	0.178117	0.241704	0.11639	0.3851	0.525733	0.764661	Milk HMOs at 14-21d
2	milk_macro_micro_1421	PN	0.184991	2259	271	0.0694725	-0.0469672	0.185912	0.241161	-46.0375	0.206879	0.525733	0.585315	Milk Macro- and Micronutrients at 14-21d
2	milk_targeted_1421	Choline	0.163076	2292	275	-0.159109	-0.270024	-0.0481934	0.00508996	-0.00520651	0.963593	0.169139	0.989175	Milk Targeted Metabolites at 14-21d
2	milk_metabolome_1421	rLC_pos_mtb_1287015	0.139981	2292	275	-0.146982	-0.257209	-0.0367546	0.00914823	-0.105244	0.377277	0.169139	0.764661	Milk Metabolome at 14-21d
2	maternal_prot_dep_12	P04406	0.129843	1217	144	-0.144552	-0.302723	0.0136181	0.0729424	-0.200304	0.338738	0.28034	0.701672	Plasma Proteome (Depleted) at 1-2m
2	maternal_prot_nav_12	P14618	0.125904	1217	144	-0.077328	-0.226463	0.0718069	0.307163	-0.175399	0.256285	0.565571	0.600302	Plasma Proteome (Naive) at 1-2m
2	milk_taxa_1421	Pauljensenia.sp1	0.109709	1575	188	-0.104395	-0.232148	0.0233575	0.108645	-0.21879	0.101086	0.360081	0.404345	Milk Microbiome at 14-21d
2	milk_taxa_1421	Unclassified.Quadrisphaeraceae.sp5	0.10968	1575	188	-0.157505	-0.289631	-0.0253799	0.0197293	-0.151407	0.274983	0.203008	0.60185	Milk Microbiome at 14-21d
2	milk_taxa_1421	Micromonospora_H_372070.sp5	0.109517	1575	188	-0.13932	-0.277508	-0.00113291	0.04817	-1.05835	0.0291928	0.220928	0.284733	Milk Microbiome at 14-21d
2	maternal_taxa_12	CAG.103.sp900317855	0.105349	1191	141	-0.0621564	-0.216531	0.0922187	0.427376	0.0370594	0.829487	0.668923	0.981842	Maternal Fecal Microbiome (Taxa) at 1-2m
2	milk_taxa_1421	Dorea_A.longicatena	0.104956	1575	188	-0.0328832	-0.170643	0.104876	0.638269	-0.0549481	0.710146	0.822658	0.909579	Milk Microbiome at 14-21d
2	milk_hmo_1421	DSLNT_nmol/mL	0.100731	2292	275	-0.078103	-0.191297	0.0350907	0.175466	0.0557705	0.654963	0.424044	0.909579	Milk HMOs at 14-21d
2	infant_taxa_12	Clostridium_E.jeddahense	0.097503	1191	141	-0.0104377	-0.172767	0.151892	0.899024	-0.455887	0.00497686	0.965618	0.115463	Infant Fecal Microbiome (Taxa) at 1-2m
2	infant_taxa_12	Veillonella_A.magna	0.0972412	1191	141	-0.168766	-0.329985	-0.00754805	0.0403268	2.72054	0.402106	0.204445	0.764661	Infant Fecal Microbiome (Taxa) at 1-2m
2	infant_taxa_12	Parabacteroides.goldsteinii	0.0963695	1191	141	-0.168806	-0.330017	-0.00759483	0.0402718	4.21853	0.392261	0.204445	0.764661	Infant Fecal Microbiome (Taxa) at 1-2m
2	milk_targeted_1421	Gln	0.0857231	2292	275	0.120782	0.0087695	0.232795	0.0346682	-0.0304532	0.819149	0.204445	0.979601	Milk Targeted Metabolites at 14-21d
2	milk_bioactive_1421	FSH	0.0842311	2292	275	0.037011	-0.0737324	0.147754	0.511139	0.0652975	0.616446	0.732001	0.904579	Milk Bioactive Proteins at 14-21d
2	milk_targeted_1421	Ser	0.0842242	2292	275	0.120197	0.00807078	0.232323	0.0357331	0.0482728	0.718882	0.204445	0.909579	Milk Targeted Metabolites at 14-21d
2	maternal_prot_dep_12	P60174	0.0814088	1217	144	-0.118828	-0.277503	0.0398474	0.140995	-0.22677	0.179485	0.380612	0.567469	Plasma Proteome (Depleted) at 1-2m
2	milk_metabolome_1421	rLC_neg_mtb_1619768	0.0778741	2292	275	-0.0829884	-0.195864	0.0298872	0.148929	-0.103794	0.397204	0.392631	0.764661	Milk Metabolome at 14-21d
2	milk_macro_micro_1421	CARBOHYDRATE	0.0729978	2259	271	0.0568587	-0.0570169	0.170734	0.326476	-0.0726597	0.569884	0.573805	0.901527	Milk Macro- and Micronutrients at 14-21d
2	maternal_taxa_12	CAG.110.sp900540635	0.0728103	1191	141	-0.025686	-0.182028	0.130656	0.745812	0.078412	0.639443	0.877575	0.904579	Maternal Fecal Microbiome (Taxa) at 1-2m
2	maternal_prot_nav_12	P51797	0.0671286	1217	144	0.00343645	-0.160906	0.167779	0.967089	-0.096908	0.575112	0.984055	0.901527	Plasma Proteome (Naive) at 1-2m
2	milk_targeted_1421	Glu	0.0657474	2292	275	0.0888865	-0.023427	0.2012	0.120382	-0.0330317	0.796566	0.367483	0.972649	Milk Targeted Metabolites at 14-21d
2	milk_metabolome_1421	rLC_pos_mtb_1432823	0.0607958	2292	275	-0.131371	-0.242781	-0.0199603	0.0210008	-0.183646	0.147273	0.203008	0.488103	Milk Metabolome at 14-21d
2	maternal_taxa_12	CAG.180.sp000432435	0.0591843	1191	141	-0.075885	-0.230336	0.0785655	0.33305	-0.137714	0.423254	0.576623	0.787808	Maternal Fecal Microbiome (Taxa) at 1-2m
2	maternal_prot_dep_12	P00338	0.0591041	1217	144	-0.135298	-0.293644	0.0230493	0.0934057	-0.242621	0.136753	0.318678	0.466568	Plasma Proteome (Depleted) at 1-2m
2	milk_metabolome_1421	rLC_neg_mtb_2652431	0.0557678	2292	275	-0.0732575	-0.186197	0.0396824	0.202699	-0.0874152	0.474049	0.479858	0.808672	Milk Metabolome at 14-21d
2	milk_bioactive_1421	LH	0.0552341	2292	275	-0.0528224	-0.156234	0.0505894	0.315523	-0.754013	0.115778	0.571885	0.42099	Milk Bioactive Proteins at 14-21d
2	infant_taxa_12	Collinsella.vaginalis	0.0529162	1191	141	-0.179836	-0.339705	-0.0199674	0.0277516	-0.0595832	0.738498	0.204445	0.911338	Infant Fecal Microbiome (Taxa) at 1-2m
2	maternal_prot_dep_12	P37837	0.0505459	1217	144	-0.0745688	-0.230689	0.081551	0.346701	-0.0790701	0.618133	0.590375	0.904579	Plasma Proteome (Depleted) at 1-2m
2	maternal_taxa_12	Prevotella.sp900552965	0.0501304	1191	141	0.0451245	-0.109919	0.200168	0.565951	0.0288053	0.862084	0.768662	0.986939	Maternal Fecal Microbiome (Taxa) at 1-2m
2	maternal_taxa_12	Prevotella.sp000434975	0.0497909	1191	141	-0.0473117	-0.203614	0.108991	0.550525	-0.128723	0.496232	0.760249	0.822327	Maternal Fecal Microbiome (Taxa) at 1-2m
2	maternal_prot_nav_12	P17936	0.049483	1217	144	-0.0570438	-0.21316	0.0990722	0.471317	-0.131834	0.462777	0.719379	0.808672	Plasma Proteome (Naive) at 1-2m
2	milk_metabolome_1421	rLC_neg_mtb_4158835	0.047301	2292	275	-0.169441	-0.279929	-0.0589516	0.00277419	-0.02156	0.860013	0.169139	0.986939	Milk Metabolome at 14-21d
2	maternal_prot_dep_12	P62937	0.0441919	1217	144	-0.0984596	-0.257145	0.0602262	0.222033	-0.310016	0.0665465	0.515118	0.318595	Plasma Proteome (Depleted) at 1-2m
2	maternal_prot_nav_12	P06727	0.0413175	1217	144	0.00127339	-0.153184	0.155731	0.987021	-0.175969	0.265348	0.987021	0.600302	Plasma Proteome (Naive) at 1-2m
2	milk_taxa_1421	Thauera_A_597130.chlorobenzoica	0.0410825	1575	188	0.00598155	-0.129977	0.14194	0.930931	0.104654	0.472377	0.981709	0.808672	Milk Microbiome at 14-21d
2	milk_targeted_1421	TG.20.2_32.1.	0.0403491	2292	275	-0.14566	-0.256519	-0.0348008	0.0102067	0.294521	0.0314691	0.169139	0.284733	Milk Targeted Metabolites at 14-21d
2	milk_macro_micro_1421	TMP	0.0363534	2275	273	0.115098	0.00242366	0.227773	0.0453043	0.172047	0.195679	0.218971	0.567469	Milk Macro- and Micronutrients at 14-21d
2	infant_taxa_12	Enterobacter.cloacae	0.0361645	1191	141	-0.179155	-0.334714	-0.0235969	0.024304	-0.0894265	0.571375	0.204445	0.901527	Infant Fecal Microbiome (Taxa) at 1-2m
2	infant_gene_12	K02077	0.0318053	1191	141	0.018209	-0.13931	0.175728	0.819562	0.0136559	0.938594	0.932051	0.987406	Infant Fecal Metagenome (Genes) at 1-2m
2	milk_hmo_1421	LNT_nmol/mL	0.0283766	2292	275	-0.0916717	-0.205179	0.021835	0.112998	-0.0620808	0.636815	0.364105	0.904579	Milk HMOs at 14-21d
2	maternal_prot_nav_12	P02749	0.0279492	1217	144	-0.0550331	-0.210133	0.100067	0.484218	-0.0830654	0.638119	0.72686	0.904579	Plasma Proteome (Naive) at 1-2m
2	maternal_gene_12	K06142	0.0175723	1191	141	0.027903	-0.126885	0.182691	0.722088	0.34263	0.0714092	0.877575	0.318595	Maternal Fecal Metagenome (Genes) at 1-2m
2	maternal_gene_12	K14246	0.0146084	1191	141	0.0873617	-0.0663127	0.241036	0.262977	0.217856	0.242948	0.525954	0.600302	Maternal Fecal Metagenome (Genes) at 1-2m
2	maternal_gene_12	GH23_0	0.0137783	1191	141	0.0728274	-0.0810896	0.226744	0.351171	0.423883	0.0341395	0.590375	0.284733	Maternal Fecal Metagenome (Genes) at 1-2m
2	maternal_gene_12	K03406	0.013599	1191	141	-0.0151275	-0.169453	0.139198	0.846621	-0.251929	0.118234	0.942005	0.42099	Maternal Fecal Metagenome (Genes) at 1-2m
2	maternal_gene_12	K24528	0.013187	1191	141	0.0890267	-0.0648354	0.242889	0.254605	0.181188	0.317793	0.525733	0.677635	Maternal Fecal Metagenome (Genes) at 1-2m
2	infant_gene_12	K00059	0.0118561	1191	141	-0.117738	-0.275003	0.0395278	0.141089	-0.538925	0.00179611	0.380612	0.110027	Infant Fecal Metagenome (Genes) at 1-2m
2	infant_gene_12	AA1_0	0.0110698	1191	141	-0.18503	-0.340546	-0.0295135	0.0200518	-0.358444	0.0435585	0.203008	0.284733	Infant Fecal Metagenome (Genes) at 1-2m
2	infant_gene_12	GH73_0	0.0105875	1191	141	-0.167078	-0.322347	-0.01181	0.0351362	-0.46309	0.00379404	0.204445	0.110027	Infant Fecal Metagenome (Genes) at 1-2m
2	infant_gene_12	3003801	0.00946168	1191	141	-0.111744	-0.268873	0.0453845	0.161942	-0.356228	0.0555241	0.417451	0.306195	Infant Fecal Metagenome (Genes) at 1-2m
2	milk_macro_micro_1421	B1	0.00896235	2275	273	0.102856	-0.0104077	0.21612	0.0749184	0.100796	0.466582	0.28034	0.808672	Milk Macro- and Micronutrients at 14-21d
2	milk_hmo_1421	LNFP III_nmol/mL	0.00874919	2292	275	-0.060119	-0.174406	0.0541683	0.301308	0.0722858	0.623062	0.565571	0.904579	Milk HMOs at 14-21d
2	milk_hmo_1421	LSTc_nmol/mL	0.00757065	2292	275	-0.0862819	-0.198275	0.0257112	0.130496	0.0556424	0.671786	0.37777	0.909579	Milk HMOs at 14-21d
2	milk_macro_micro_1421	Mn	0.00684463	2232	268	-0.1396	-0.251342	-0.0278575	0.0145382	-0.0317207	0.817598	0.187381	0.979601	Milk Macro- and Micronutrients at 14-21d
2	milk_hmo_1421	Sia_nmol/mL	0.00447468	2292	275	-0.0449893	-0.157659	0.0676804	0.432494	-0.00146879	0.991585	0.668923	0.993552	Milk HMOs at 14-21d
2	milk_bioactive_1421	FGF-21	0.00421772	2292	275	-0.065434	-0.178781	0.0479127	0.256744	-0.515304	0.00337886	0.525733	0.110027	Milk Bioactive Proteins at 14-21d

## Sheet: DIABLO_svn_later
block	comp	feature	timepoint	loading	corr_case	direction	score	block_label	mz	rt	ion_mode	mummi_EID	mummi_compounds	mummi_compound_names
infant_gene_56	1	K00088	5-6 months	0.315403	-0.0863994	Lower in Case	0.0272506	Infant Fecal Metagenome (Genes) at 5-6m
infant_gene_56	1	K01776	5-6 months	0.307242	-0.0866902	Lower in Case	0.0266348	Infant Fecal Metagenome (Genes) at 5-6m
infant_gene_56	1	K02111	5-6 months	0.235793	-0.104569	Lower in Case	0.0246567	Infant Fecal Metagenome (Genes) at 5-6m
infant_gene_56	1	K02982	5-6 months	0.222666	-0.107015	Lower in Case	0.0238287	Infant Fecal Metagenome (Genes) at 5-6m
infant_gene_56	1	K00075	5-6 months	0.262038	-0.0789291	Lower in Case	0.0206824	Infant Fecal Metagenome (Genes) at 5-6m
infant_gene_56	1	K00962	5-6 months	0.33612	-0.0603625	Lower in Case	0.020289	Infant Fecal Metagenome (Genes) at 5-6m
infant_gene_56	1	K02963	5-6 months	0.2052	-0.0979849	Lower in Case	0.0201065	Infant Fecal Metagenome (Genes) at 5-6m
infant_gene_56	1	K07082	5-6 months	0.202145	-0.0990202	Lower in Case	0.0200165	Infant Fecal Metagenome (Genes) at 5-6m
infant_gene_56	1	K02863	5-6 months	0.21106	-0.0836393	Lower in Case	0.0176529	Infant Fecal Metagenome (Genes) at 5-6m
infant_gene_56	1	K02601	5-6 months	0.211358	-0.0777241	Lower in Case	0.0164276	Infant Fecal Metagenome (Genes) at 5-6m
infant_gene_56	1	K02902	5-6 months	0.158143	-0.0997413	Lower in Case	0.0157734	Infant Fecal Metagenome (Genes) at 5-6m
infant_gene_56	1	K02935	5-6 months	0.180962	-0.0871529	Lower in Case	0.0157713	Infant Fecal Metagenome (Genes) at 5-6m
infant_gene_56	1	K03979	5-6 months	0.151838	-0.0973681	Lower in Case	0.0147842	Infant Fecal Metagenome (Genes) at 5-6m
infant_gene_56	1	K02950	5-6 months	0.157226	-0.0935171	Lower in Case	0.0147033	Infant Fecal Metagenome (Genes) at 5-6m
infant_gene_56	1	K02888	5-6 months	0.118098	-0.121226	Lower in Case	0.0143166	Infant Fecal Metagenome (Genes) at 5-6m
infant_gene_56	1	K02886	5-6 months	0.129755	-0.106954	Lower in Case	0.0138779	Infant Fecal Metagenome (Genes) at 5-6m
infant_gene_56	1	K06207	5-6 months	0.136583	-0.0981	Lower in Case	0.0133988	Infant Fecal Metagenome (Genes) at 5-6m
infant_gene_56	1	K02340	5-6 months	0.137012	-0.0946603	Lower in Case	0.0129695	Infant Fecal Metagenome (Genes) at 5-6m
infant_gene_56	1	K02879	5-6 months	0.119956	-0.101031	Lower in Case	0.0121193	Infant Fecal Metagenome (Genes) at 5-6m
infant_gene_56	1	K02899	5-6 months	0.116244	-0.101423	Lower in Case	0.0117899	Infant Fecal Metagenome (Genes) at 5-6m
infant_gene_56	1	K02967	5-6 months	0.129097	-0.0913242	Lower in Case	0.0117897	Infant Fecal Metagenome (Genes) at 5-6m
infant_gene_56	1	K03043	5-6 months	0.120515	-0.0795459	Lower in Case	0.00958645	Infant Fecal Metagenome (Genes) at 5-6m
infant_gene_56	1	K02834	5-6 months	0.0891279	-0.102714	Lower in Case	0.00915469	Infant Fecal Metagenome (Genes) at 5-6m
infant_gene_56	1	K02884	5-6 months	0.0896924	-0.10165	Lower in Case	0.00911721	Infant Fecal Metagenome (Genes) at 5-6m
infant_gene_56	1	K02990	5-6 months	0.0865118	-0.105045	Lower in Case	0.00908765	Infant Fecal Metagenome (Genes) at 5-6m
infant_gene_56	1	K01945	5-6 months	0.0940321	-0.0957207	Lower in Case	0.00900082	Infant Fecal Metagenome (Genes) at 5-6m
infant_gene_56	1	K02911	5-6 months	0.0928434	-0.0942785	Lower in Case	0.00875313	Infant Fecal Metagenome (Genes) at 5-6m
infant_gene_56	1	K02881	5-6 months	0.0872827	-0.0972007	Lower in Case	0.00848394	Infant Fecal Metagenome (Genes) at 5-6m
infant_gene_56	1	K08316	5-6 months	0.0719296	-0.109271	Lower in Case	0.0078598	Infant Fecal Metagenome (Genes) at 5-6m
infant_gene_56	1	K09903	5-6 months	0.0673936	-0.115243	Lower in Case	0.00776666	Infant Fecal Metagenome (Genes) at 5-6m
infant_gene_56	1	K11753	5-6 months	0.0739738	-0.0983808	Lower in Case	0.00727759	Infant Fecal Metagenome (Genes) at 5-6m
infant_gene_56	1	K11991	5-6 months	0.0926539	-0.0784123	Lower in Case	0.00726521	Infant Fecal Metagenome (Genes) at 5-6m
infant_gene_56	1	K01142	5-6 months	0.076525	-0.0943484	Lower in Case	0.00722001	Infant Fecal Metagenome (Genes) at 5-6m
infant_gene_56	1	K02835	5-6 months	0.0780255	-0.0916548	Lower in Case	0.00715141	Infant Fecal Metagenome (Genes) at 5-6m
infant_gene_56	1	K02503	5-6 months	0.078679	-0.0905289	Lower in Case	0.00712273	Infant Fecal Metagenome (Genes) at 5-6m
infant_gene_56	1	K01892	5-6 months	0.0770343	-0.0852698	Lower in Case	0.0065687	Infant Fecal Metagenome (Genes) at 5-6m
infant_gene_56	1	K02939	5-6 months	0.0606583	-0.104325	Lower in Case	0.00632816	Infant Fecal Metagenome (Genes) at 5-6m
infant_gene_56	1	K02519	5-6 months	0.0577313	-0.086057	Lower in Case	0.00496818	Infant Fecal Metagenome (Genes) at 5-6m
infant_gene_56	1	K02946	5-6 months	0.0606145	-0.0810011	Lower in Case	0.00490984	Infant Fecal Metagenome (Genes) at 5-6m
infant_gene_56	1	K02914	5-6 months	0.0394272	-0.105995	Lower in Case	0.00417907	Infant Fecal Metagenome (Genes) at 5-6m
infant_gene_56	1	K03040	5-6 months	0.0368691	-0.109251	Lower in Case	0.00402799	Infant Fecal Metagenome (Genes) at 5-6m
infant_gene_56	1	K03685	5-6 months	0.0415955	-0.096432	Lower in Case	0.00401113	Infant Fecal Metagenome (Genes) at 5-6m
infant_gene_56	1	K02838	5-6 months	0.0280814	-0.113209	Lower in Case	0.00317907	Infant Fecal Metagenome (Genes) at 5-6m
infant_gene_56	1	K02986	5-6 months	0.0245991	-0.104531	Lower in Case	0.00257136	Infant Fecal Metagenome (Genes) at 5-6m
infant_gene_56	1	K03536	5-6 months	0.0175639	-0.119503	Lower in Case	0.00209894	Infant Fecal Metagenome (Genes) at 5-6m
infant_gene_56	1	K00858	5-6 months	0.0194019	-0.106205	Lower in Case	0.00206058	Infant Fecal Metagenome (Genes) at 5-6m
infant_gene_56	1	K00826	5-6 months	0.0157827	-0.0872372	Lower in Case	0.00137684	Infant Fecal Metagenome (Genes) at 5-6m
infant_gene_56	1	K01872	5-6 months	0.010575	-0.0937972	Lower in Case	0.000991908	Infant Fecal Metagenome (Genes) at 5-6m
infant_gene_56	1	K02948	5-6 months	0.00889993	-0.101028	Lower in Case	0.00089914	Infant Fecal Metagenome (Genes) at 5-6m
infant_gene_56	1	K00954	5-6 months	0.00625216	-0.0882564	Lower in Case	0.000551793	Infant Fecal Metagenome (Genes) at 5-6m
infant_taxa_56	1	Methanobrevibacter_A.smithii	5-6 months	-0.0477818	0.115071	Higher in Case	0.00549829	Infant Fecal Microbiome (Taxa) at 5-6m
infant_taxa_56	1	Methanosphaera.stadtmanae	5-6 months	-0.0477818	0.115071	Higher in Case	0.00549829	Infant Fecal Microbiome (Taxa) at 5-6m
infant_taxa_56	1	MX.02.sp006954405	5-6 months	-0.0477818	0.115071	Higher in Case	0.00549829	Infant Fecal Microbiome (Taxa) at 5-6m
infant_taxa_56	1	Methanomethylophilus.alvus	5-6 months	-0.0477818	0.115071	Higher in Case	0.00549829	Infant Fecal Microbiome (Taxa) at 5-6m
infant_taxa_56	1	UBA71.sp006954465	5-6 months	-0.0477818	0.115071	Higher in Case	0.00549829	Infant Fecal Microbiome (Taxa) at 5-6m
infant_taxa_56	1	Unknown_UBA71	5-6 months	-0.0477818	0.115071	Higher in Case	0.00549829	Infant Fecal Microbiome (Taxa) at 5-6m
infant_taxa_56	1	Actinomyces.urogenitalis	5-6 months	-0.0477818	0.115071	Higher in Case	0.00549829	Infant Fecal Microbiome (Taxa) at 5-6m
infant_taxa_56	1	Unknown_Arcanobacterium_A	5-6 months	-0.0477818	0.115071	Higher in Case	0.00549829	Infant Fecal Microbiome (Taxa) at 5-6m
infant_taxa_56	1	Unknown_Arcanobacterium_A.1	5-6 months	-0.0477818	0.115071	Higher in Case	0.00549829	Infant Fecal Microbiome (Taxa) at 5-6m
infant_taxa_56	1	Gleimia.europaea_A	5-6 months	-0.0477818	0.115071	Higher in Case	0.00549829	Infant Fecal Microbiome (Taxa) at 5-6m
infant_taxa_56	1	Pauljensenia.sp001838165	5-6 months	-0.0477818	0.115071	Higher in Case	0.00549829	Infant Fecal Microbiome (Taxa) at 5-6m
infant_taxa_56	1	Pauljensenia.turicensis	5-6 months	-0.0477818	0.115071	Higher in Case	0.00549829	Infant Fecal Microbiome (Taxa) at 5-6m
infant_taxa_56	1	Alloscardovia.omnicolens	5-6 months	-0.0477818	0.115071	Higher in Case	0.00549829	Infant Fecal Microbiome (Taxa) at 5-6m
infant_taxa_56	1	Bifidobacterium.adolescentis	5-6 months	-0.0477818	0.115071	Higher in Case	0.00549829	Infant Fecal Microbiome (Taxa) at 5-6m
infant_taxa_56	1	Bifidobacterium.dentium	5-6 months	-0.0477818	0.115071	Higher in Case	0.00549829	Infant Fecal Microbiome (Taxa) at 5-6m
infant_taxa_56	1	Bifidobacterium.pseudocatenulatum	5-6 months	-0.0477818	0.115071	Higher in Case	0.00549829	Infant Fecal Microbiome (Taxa) at 5-6m
infant_taxa_56	1	Bifidobacterium.sp002884815	5-6 months	-0.0477818	0.115071	Higher in Case	0.00549829	Infant Fecal Microbiome (Taxa) at 5-6m
infant_taxa_56	1	Bifidobacterium.vaginale	5-6 months	-0.0477818	0.115071	Higher in Case	0.00549829	Infant Fecal Microbiome (Taxa) at 5-6m
infant_taxa_56	1	Bifidobacterium.vaginale_G	5-6 months	-0.0477818	0.115071	Higher in Case	0.00549829	Infant Fecal Microbiome (Taxa) at 5-6m
infant_taxa_56	1	Rothia.mucilaginosa_A	5-6 months	-0.0477818	0.115071	Higher in Case	0.00549829	Infant Fecal Microbiome (Taxa) at 5-6m
infant_taxa_56	1	Cutibacterium.avidum	5-6 months	-0.0477818	0.115071	Higher in Case	0.00549829	Infant Fecal Microbiome (Taxa) at 5-6m
infant_taxa_56	1	Fannyhessea.vaginae	5-6 months	-0.0477818	0.115071	Higher in Case	0.00549829	Infant Fecal Microbiome (Taxa) at 5-6m
infant_taxa_56	1	Lancefieldella.sp000564995	5-6 months	-0.0477818	0.115071	Higher in Case	0.00549829	Infant Fecal Microbiome (Taxa) at 5-6m
infant_taxa_56	1	Lancefieldella.sp900555335	5-6 months	-0.0477818	0.115071	Higher in Case	0.00549829	Infant Fecal Microbiome (Taxa) at 5-6m
infant_taxa_56	1	Unknown_Lancefieldella	5-6 months	-0.0477818	0.115071	Higher in Case	0.00549829	Infant Fecal Microbiome (Taxa) at 5-6m
infant_taxa_56	1	Unknown_Lancefieldella.1	5-6 months	-0.0477818	0.115071	Higher in Case	0.00549829	Infant Fecal Microbiome (Taxa) at 5-6m
infant_taxa_56	1	Olsenella_B.sp000752675	5-6 months	-0.0477818	0.115071	Higher in Case	0.00549829	Infant Fecal Microbiome (Taxa) at 5-6m
infant_taxa_56	1	Olsenella_E.provencensis	5-6 months	-0.0477818	0.115071	Higher in Case	0.00549829	Infant Fecal Microbiome (Taxa) at 5-6m
infant_taxa_56	1	Olsenella_E.sp003150175	5-6 months	-0.0477818	0.115071	Higher in Case	0.00549829	Infant Fecal Microbiome (Taxa) at 5-6m
infant_taxa_56	1	Olsenella_E.sp003609875	5-6 months	-0.0477818	0.115071	Higher in Case	0.00549829	Infant Fecal Microbiome (Taxa) at 5-6m
infant_taxa_56	1	Olsenella_E.sp900540955	5-6 months	-0.0477818	0.115071	Higher in Case	0.00549829	Infant Fecal Microbiome (Taxa) at 5-6m
infant_taxa_56	1	Unknown_Olsenella_E	5-6 months	-0.0477818	0.115071	Higher in Case	0.00549829	Infant Fecal Microbiome (Taxa) at 5-6m
infant_taxa_56	1	Parolsenella.massiliensis	5-6 months	-0.0477818	0.115071	Higher in Case	0.00549829	Infant Fecal Microbiome (Taxa) at 5-6m
infant_taxa_56	1	Parolsenella.sp900544655	5-6 months	-0.0477818	0.115071	Higher in Case	0.00549829	Infant Fecal Microbiome (Taxa) at 5-6m
infant_taxa_56	1	Parolsenella.sp900552935	5-6 months	-0.0477818	0.115071	Higher in Case	0.00549829	Infant Fecal Microbiome (Taxa) at 5-6m
infant_taxa_56	1	Unknown_Atopobiaceae	5-6 months	-0.0477818	0.115071	Higher in Case	0.00549829	Infant Fecal Microbiome (Taxa) at 5-6m
infant_taxa_56	1	Collinsella.bouchesdurhonensis	5-6 months	-0.0477818	0.115071	Higher in Case	0.00549829	Infant Fecal Microbiome (Taxa) at 5-6m
infant_taxa_56	1	Unknown_Collinsella	5-6 months	-0.0477818	0.115071	Higher in Case	0.00549829	Infant Fecal Microbiome (Taxa) at 5-6m
infant_taxa_56	1	Unknown_Collinsella.2	5-6 months	-0.0477818	0.115071	Higher in Case	0.00549829	Infant Fecal Microbiome (Taxa) at 5-6m
infant_taxa_56	1	Unknown_Collinsella.3	5-6 months	-0.0477818	0.115071	Higher in Case	0.00549829	Infant Fecal Microbiome (Taxa) at 5-6m
infant_taxa_56	1	Unknown_Collinsella.4	5-6 months	-0.0477818	0.115071	Higher in Case	0.00549829	Infant Fecal Microbiome (Taxa) at 5-6m
infant_taxa_56	1	Unknown_Collinsella.5	5-6 months	-0.0477818	0.115071	Higher in Case	0.00549829	Infant Fecal Microbiome (Taxa) at 5-6m
infant_taxa_56	1	Unknown_Collinsella.6	5-6 months	-0.0477818	0.115071	Higher in Case	0.00549829	Infant Fecal Microbiome (Taxa) at 5-6m
infant_taxa_56	1	Unknown_Collinsella.7	5-6 months	-0.0477818	0.115071	Higher in Case	0.00549829	Infant Fecal Microbiome (Taxa) at 5-6m
infant_taxa_56	1	Unknown_Collinsella.8	5-6 months	-0.0477818	0.115071	Higher in Case	0.00549829	Infant Fecal Microbiome (Taxa) at 5-6m
infant_taxa_56	1	Unknown_Collinsella.9	5-6 months	-0.0477818	0.115071	Higher in Case	0.00549829	Infant Fecal Microbiome (Taxa) at 5-6m
infant_taxa_56	1	Enorma.sp900538305	5-6 months	-0.0477818	0.115071	Higher in Case	0.00549829	Infant Fecal Microbiome (Taxa) at 5-6m
infant_taxa_56	1	Unknown_Enorma	5-6 months	-0.0477818	0.115071	Higher in Case	0.00549829	Infant Fecal Microbiome (Taxa) at 5-6m
infant_taxa_56	1	CAG.1427.sp000434775	5-6 months	-0.0477818	0.115071	Higher in Case	0.00549829	Infant Fecal Microbiome (Taxa) at 5-6m
infant_taxa_56	1	CAG.1427.sp000435475	5-6 months	-0.0477818	0.115071	Higher in Case	0.00549829	Infant Fecal Microbiome (Taxa) at 5-6m
infant_taxa_56	1	CAG.1427.sp000435675	5-6 months	-0.0477818	0.115071	Higher in Case	0.00549829	Infant Fecal Microbiome (Taxa) at 5-6m
infant_taxa_56	1	CAG.1427.sp000436075	5-6 months	-0.0477818	0.115071	Higher in Case	0.00549829	Infant Fecal Microbiome (Taxa) at 5-6m
infant_taxa_56	1	CAG.1427.sp900553605	5-6 months	-0.0477818	0.115071	Higher in Case	0.00549829	Infant Fecal Microbiome (Taxa) at 5-6m
infant_taxa_56	1	Unknown_CAG.1427	5-6 months	-0.0477818	0.115071	Higher in Case	0.00549829	Infant Fecal Microbiome (Taxa) at 5-6m
infant_taxa_56	1	DNF00809.sp001552935	5-6 months	-0.0477818	0.115071	Higher in Case	0.00549829	Infant Fecal Microbiome (Taxa) at 5-6m
infant_taxa_56	1	Gordonibacter.pamelaeae	5-6 months	-0.0477818	0.115071	Higher in Case	0.00549829	Infant Fecal Microbiome (Taxa) at 5-6m
infant_taxa_56	1	Gordonibacter.pamelaeae.1	5-6 months	-0.0477818	0.115071	Higher in Case	0.00549829	Infant Fecal Microbiome (Taxa) at 5-6m
infant_taxa_56	1	Phoenicibacter.congonensis	5-6 months	-0.0477818	0.115071	Higher in Case	0.00549829	Infant Fecal Microbiome (Taxa) at 5-6m
infant_taxa_56	1	Senegalimassilia.sp004135645	5-6 months	-0.0477818	0.115071	Higher in Case	0.00549829	Infant Fecal Microbiome (Taxa) at 5-6m
infant_taxa_56	1	Senegalimassilia.sp900550055	5-6 months	-0.0477818	0.115071	Higher in Case	0.00549829	Infant Fecal Microbiome (Taxa) at 5-6m
infant_taxa_56	1	Unknown_Senegalimassilia	5-6 months	-0.0477818	0.115071	Higher in Case	0.00549829	Infant Fecal Microbiome (Taxa) at 5-6m
infant_taxa_56	1	Unknown_Senegalimassilia.1	5-6 months	-0.0477818	0.115071	Higher in Case	0.00549829	Infant Fecal Microbiome (Taxa) at 5-6m
infant_taxa_56	1	Unknown_Senegalimassilia.2	5-6 months	-0.0477818	0.115071	Higher in Case	0.00549829	Infant Fecal Microbiome (Taxa) at 5-6m
infant_taxa_56	1	Unknown_Senegalimassilia.3	5-6 months	-0.0477818	0.115071	Higher in Case	0.00549829	Infant Fecal Microbiome (Taxa) at 5-6m
infant_taxa_56	1	Slackia.exigua	5-6 months	-0.0477818	0.115071	Higher in Case	0.00549829	Infant Fecal Microbiome (Taxa) at 5-6m
infant_taxa_56	1	Slackia_A.isoflavoniconvertens	5-6 months	-0.0477818	0.115071	Higher in Case	0.00549829	Infant Fecal Microbiome (Taxa) at 5-6m
infant_taxa_56	1	Unknown_Slackia_A	5-6 months	-0.0477818	0.115071	Higher in Case	0.00549829	Infant Fecal Microbiome (Taxa) at 5-6m
infant_taxa_56	1	Unknown_Slackia_A.1	5-6 months	-0.0477818	0.115071	Higher in Case	0.00549829	Infant Fecal Microbiome (Taxa) at 5-6m
infant_taxa_56	1	Unknown_Slackia_A.2	5-6 months	-0.0477818	0.115071	Higher in Case	0.00549829	Infant Fecal Microbiome (Taxa) at 5-6m
infant_taxa_56	1	UMGS1293.sp900550385	5-6 months	-0.0477818	0.115071	Higher in Case	0.00549829	Infant Fecal Microbiome (Taxa) at 5-6m
infant_taxa_56	1	Unknown_UMGS1293	5-6 months	-0.0477818	0.115071	Higher in Case	0.00549829	Infant Fecal Microbiome (Taxa) at 5-6m
infant_taxa_56	1	Unknown_UMGS1502	5-6 months	-0.0477818	0.115071	Higher in Case	0.00549829	Infant Fecal Microbiome (Taxa) at 5-6m
infant_taxa_56	1	Unknown_UMGS1502.1	5-6 months	-0.0477818	0.115071	Higher in Case	0.00549829	Infant Fecal Microbiome (Taxa) at 5-6m
infant_taxa_56	1	UMGS1773.sp900554945	5-6 months	-0.0477818	0.115071	Higher in Case	0.00549829	Infant Fecal Microbiome (Taxa) at 5-6m
infant_taxa_56	1	Unknown_Eggerthellaceae	5-6 months	-0.0477818	0.115071	Higher in Case	0.00549829	Infant Fecal Microbiome (Taxa) at 5-6m
infant_taxa_56	1	Unknown_QAMH01	5-6 months	-0.0477818	0.115071	Higher in Case	0.00549829	Infant Fecal Microbiome (Taxa) at 5-6m
infant_taxa_56	1	Unknown_QAMH01.1	5-6 months	-0.0477818	0.115071	Higher in Case	0.00549829	Infant Fecal Microbiome (Taxa) at 5-6m
infant_taxa_56	1	Unknown_W2P13.069	5-6 months	-0.0477818	0.115071	Higher in Case	0.00549829	Infant Fecal Microbiome (Taxa) at 5-6m
infant_taxa_56	1	UMGS124.sp900539345	5-6 months	-0.0477818	0.115071	Higher in Case	0.00549829	Infant Fecal Microbiome (Taxa) at 5-6m
infant_taxa_56	1	Unknown_UMGS124	5-6 months	-0.0477818	0.115071	Higher in Case	0.00549829	Infant Fecal Microbiome (Taxa) at 5-6m
infant_taxa_56	1	Bacteroides.bouchesdurhonensis	5-6 months	-0.0477818	0.115071	Higher in Case	0.00549829	Infant Fecal Microbiome (Taxa) at 5-6m
infant_taxa_56	1	Bacteroides.cellulosilyticus	5-6 months	-0.0477818	0.115071	Higher in Case	0.00549829	Infant Fecal Microbiome (Taxa) at 5-6m
infant_taxa_56	1	Bacteroides.clarus	5-6 months	-0.0477818	0.115071	Higher in Case	0.00549829	Infant Fecal Microbiome (Taxa) at 5-6m
infant_taxa_56	1	Bacteroides.congonensis	5-6 months	-0.0477818	0.115071	Higher in Case	0.00549829	Infant Fecal Microbiome (Taxa) at 5-6m
infant_taxa_56	1	Bacteroides.eggerthii	5-6 months	-0.0477818	0.115071	Higher in Case	0.00549829	Infant Fecal Microbiome (Taxa) at 5-6m
infant_taxa_56	1	Bacteroides.finegoldii	5-6 months	-0.0477818	0.115071	Higher in Case	0.00549829	Infant Fecal Microbiome (Taxa) at 5-6m
infant_taxa_56	1	Bacteroides.intestinalis	5-6 months	-0.0477818	0.115071	Higher in Case	0.00549829	Infant Fecal Microbiome (Taxa) at 5-6m
infant_taxa_56	1	Bacteroides.salyersiae	5-6 months	-0.0477818	0.115071	Higher in Case	0.00549829	Infant Fecal Microbiome (Taxa) at 5-6m
infant_taxa_56	1	Bacteroides.stercoris	5-6 months	-0.0477818	0.115071	Higher in Case	0.00549829	Infant Fecal Microbiome (Taxa) at 5-6m
infant_taxa_56	1	Unknown_Bacteroides	5-6 months	-0.0477818	0.115071	Higher in Case	0.00549829	Infant Fecal Microbiome (Taxa) at 5-6m
infant_taxa_56	1	Unknown_Bacteroides.1	5-6 months	-0.0477818	0.115071	Higher in Case	0.00549829	Infant Fecal Microbiome (Taxa) at 5-6m
infant_taxa_56	1	Unknown_Bacteroides.2	5-6 months	-0.0477818	0.115071	Higher in Case	0.00549829	Infant Fecal Microbiome (Taxa) at 5-6m
infant_taxa_56	1	Unknown_CAG.462	5-6 months	-0.0477818	0.115071	Higher in Case	0.00549829	Infant Fecal Microbiome (Taxa) at 5-6m
infant_taxa_56	1	Unknown_OM05.12	5-6 months	-0.0477818	0.115071	Higher in Case	0.00549829	Infant Fecal Microbiome (Taxa) at 5-6m
infant_taxa_56	1	Paraprevotella.clara	5-6 months	-0.0477818	0.115071	Higher in Case	0.00549829	Infant Fecal Microbiome (Taxa) at 5-6m
infant_taxa_56	1	Unknown_Paraprevotella	5-6 months	-0.0477818	0.115071	Higher in Case	0.00549829	Infant Fecal Microbiome (Taxa) at 5-6m
infant_taxa_56	1	Phocaeicola.coprocola	5-6 months	-0.0477818	0.115071	Higher in Case	0.00549829	Infant Fecal Microbiome (Taxa) at 5-6m
infant_taxa_56	1	Phocaeicola.massiliensis	5-6 months	-0.0477818	0.115071	Higher in Case	0.00549829	Infant Fecal Microbiome (Taxa) at 5-6m
infant_taxa_56	1	Phocaeicola.sartorii	5-6 months	-0.0477818	0.115071	Higher in Case	0.00549829	Infant Fecal Microbiome (Taxa) at 5-6m
infant_taxa_56	1	Phocaeicola.sp000434735	5-6 months	-0.0477818	0.115071	Higher in Case	0.00549829	Infant Fecal Microbiome (Taxa) at 5-6m
infant_taxa_56	1	Phocaeicola.sp002493165	5-6 months	-0.0477818	0.115071	Higher in Case	0.00549829	Infant Fecal Microbiome (Taxa) at 5-6m
infant_taxa_56	1	Prevotella.amnii	5-6 months	-0.0477818	0.115071	Higher in Case	0.00549829	Infant Fecal Microbiome (Taxa) at 5-6m
infant_taxa_56	1	Prevotella.bivia	5-6 months	-0.0477818	0.115071	Higher in Case	0.00549829	Infant Fecal Microbiome (Taxa) at 5-6m
infant_taxa_56	1	Prevotella.buccalis	5-6 months	-0.0477818	0.115071	Higher in Case	0.00549829	Infant Fecal Microbiome (Taxa) at 5-6m
infant_taxa_56	1	Prevotella.colorans	5-6 months	-0.0477818	0.115071	Higher in Case	0.00549829	Infant Fecal Microbiome (Taxa) at 5-6m
infant_taxa_56	1	Prevotella.corporis	5-6 months	-0.0477818	0.115071	Higher in Case	0.00549829	Infant Fecal Microbiome (Taxa) at 5-6m
infant_taxa_56	1	Prevotella.disiens	5-6 months	-0.0477818	0.115071	Higher in Case	0.00549829	Infant Fecal Microbiome (Taxa) at 5-6m
infant_taxa_56	1	Prevotella.melaninogenica	5-6 months	-0.0477818	0.115071	Higher in Case	0.00549829	Infant Fecal Microbiome (Taxa) at 5-6m
infant_taxa_56	1	Prevotella.sp000434975	5-6 months	-0.0477818	0.115071	Higher in Case	0.00549829	Infant Fecal Microbiome (Taxa) at 5-6m
infant_taxa_56	1	Prevotella.sp000436035	5-6 months	-0.0477818	0.115071	Higher in Case	0.00549829	Infant Fecal Microbiome (Taxa) at 5-6m
infant_taxa_56	1	Prevotella.sp000436915	5-6 months	-0.0477818	0.115071	Higher in Case	0.00549829	Infant Fecal Microbiome (Taxa) at 5-6m
infant_taxa_56	1	Prevotella.sp000834015	5-6 months	-0.0477818	0.115071	Higher in Case	0.00549829	Infant Fecal Microbiome (Taxa) at 5-6m
infant_taxa_56	1	Prevotella.sp002251295	5-6 months	-0.0477818	0.115071	Higher in Case	0.00549829	Infant Fecal Microbiome (Taxa) at 5-6m
infant_taxa_56	1	Prevotella.sp002251385	5-6 months	-0.0477818	0.115071	Higher in Case	0.00549829	Infant Fecal Microbiome (Taxa) at 5-6m
infant_taxa_56	1	Prevotella.sp002300055	5-6 months	-0.0477818	0.115071	Higher in Case	0.00549829	Infant Fecal Microbiome (Taxa) at 5-6m
infant_taxa_56	1	Prevotella.sp003447235	5-6 months	-0.0477818	0.115071	Higher in Case	0.00549829	Infant Fecal Microbiome (Taxa) at 5-6m
infant_taxa_56	1	Prevotella.sp900313215	5-6 months	-0.0477818	0.115071	Higher in Case	0.00549829	Infant Fecal Microbiome (Taxa) at 5-6m
infant_taxa_56	1	Prevotella.sp900540415	5-6 months	-0.0477818	0.115071	Higher in Case	0.00549829	Infant Fecal Microbiome (Taxa) at 5-6m
infant_taxa_56	1	Prevotella.sp900543975	5-6 months	-0.0477818	0.115071	Higher in Case	0.00549829	Infant Fecal Microbiome (Taxa) at 5-6m
infant_taxa_56	1	Prevotella.sp900546535	5-6 months	-0.0477818	0.115071	Higher in Case	0.00549829	Infant Fecal Microbiome (Taxa) at 5-6m
infant_taxa_56	1	Prevotella.sp900548535	5-6 months	-0.0477818	0.115071	Higher in Case	0.00549829	Infant Fecal Microbiome (Taxa) at 5-6m
infant_taxa_56	1	Prevotella.sp900548585	5-6 months	-0.0477818	0.115071	Higher in Case	0.00549829	Infant Fecal Microbiome (Taxa) at 5-6m
infant_taxa_56	1	Prevotella.sp900548745	5-6 months	-0.0477818	0.115071	Higher in Case	0.00549829	Infant Fecal Microbiome (Taxa) at 5-6m
infant_taxa_56	1	Prevotella.sp900550035	5-6 months	-0.0477818	0.115071	Higher in Case	0.00549829	Infant Fecal Microbiome (Taxa) at 5-6m
infant_taxa_56	1	Prevotella.sp900552515	5-6 months	-0.0477818	0.115071	Higher in Case	0.00549829	Infant Fecal Microbiome (Taxa) at 5-6m
infant_taxa_56	1	Prevotella.sp900552675	5-6 months	-0.0477818	0.115071	Higher in Case	0.00549829	Infant Fecal Microbiome (Taxa) at 5-6m
infant_taxa_56	1	Prevotella.sp900552965	5-6 months	-0.0477818	0.115071	Higher in Case	0.00549829	Infant Fecal Microbiome (Taxa) at 5-6m
infant_taxa_56	1	Prevotella.sp900553155	5-6 months	-0.0477818	0.115071	Higher in Case	0.00549829	Infant Fecal Microbiome (Taxa) at 5-6m
infant_taxa_56	1	Prevotella.sp900553595	5-6 months	-0.0477818	0.115071	Higher in Case	0.00549829	Infant Fecal Microbiome (Taxa) at 5-6m
infant_taxa_56	1	Prevotella.sp900556395	5-6 months	-0.0477818	0.115071	Higher in Case	0.00549829	Infant Fecal Microbiome (Taxa) at 5-6m
infant_taxa_56	1	Prevotella.sp900556795	5-6 months	-0.0477818	0.115071	Higher in Case	0.00549829	Infant Fecal Microbiome (Taxa) at 5-6m
infant_taxa_56	1	Prevotella.sp900556825	5-6 months	-0.0477818	0.115071	Higher in Case	0.00549829	Infant Fecal Microbiome (Taxa) at 5-6m
infant_taxa_56	1	Prevotella.sp900557405	5-6 months	-0.0477818	0.115071	Higher in Case	0.00549829	Infant Fecal Microbiome (Taxa) at 5-6m
infant_taxa_56	1	Prevotella.stercorea	5-6 months	-0.0477818	0.115071	Higher in Case	0.00549829	Infant Fecal Microbiome (Taxa) at 5-6m
infant_taxa_56	1	Prevotella.timonensis	5-6 months	-0.0477818	0.115071	Higher in Case	0.00549829	Infant Fecal Microbiome (Taxa) at 5-6m
infant_taxa_56	1	Unknown_Prevotella	5-6 months	-0.0477818	0.115071	Higher in Case	0.00549829	Infant Fecal Microbiome (Taxa) at 5-6m
infant_taxa_56	1	Unknown_Prevotella.1	5-6 months	-0.0477818	0.115071	Higher in Case	0.00549829	Infant Fecal Microbiome (Taxa) at 5-6m
infant_taxa_56	1	Unknown_Prevotella.2	5-6 months	-0.0477818	0.115071	Higher in Case	0.00549829	Infant Fecal Microbiome (Taxa) at 5-6m
infant_taxa_56	1	Unknown_Prevotella.3	5-6 months	-0.0477818	0.115071	Higher in Case	0.00549829	Infant Fecal Microbiome (Taxa) at 5-6m
infant_taxa_56	1	Unknown_Prevotella.4	5-6 months	-0.0477818	0.115071	Higher in Case	0.00549829	Infant Fecal Microbiome (Taxa) at 5-6m
infant_taxa_56	1	Unknown_Prevotella.5	5-6 months	-0.0477818	0.115071	Higher in Case	0.00549829	Infant Fecal Microbiome (Taxa) at 5-6m
infant_taxa_56	1	Unknown_Prevotella.6	5-6 months	-0.0477818	0.115071	Higher in Case	0.00549829	Infant Fecal Microbiome (Taxa) at 5-6m
infant_taxa_56	1	Unknown_Prevotella.7	5-6 months	-0.0477818	0.115071	Higher in Case	0.00549829	Infant Fecal Microbiome (Taxa) at 5-6m
infant_taxa_56	1	Unknown_Prevotella.8	5-6 months	-0.0477818	0.115071	Higher in Case	0.00549829	Infant Fecal Microbiome (Taxa) at 5-6m
infant_taxa_56	1	Unknown_Prevotella.9	5-6 months	-0.0477818	0.115071	Higher in Case	0.00549829	Infant Fecal Microbiome (Taxa) at 5-6m
infant_taxa_56	1	Unknown_Prevotella.10	5-6 months	-0.0477818	0.115071	Higher in Case	0.00549829	Infant Fecal Microbiome (Taxa) at 5-6m
infant_taxa_56	1	Unknown_Prevotella.11	5-6 months	-0.0477818	0.115071	Higher in Case	0.00549829	Infant Fecal Microbiome (Taxa) at 5-6m
infant_taxa_56	1	Unknown_Prevotella.12	5-6 months	-0.0477818	0.115071	Higher in Case	0.00549829	Infant Fecal Microbiome (Taxa) at 5-6m
infant_taxa_56	1	Unknown_Prevotella.13	5-6 months	-0.0477818	0.115071	Higher in Case	0.00549829	Infant Fecal Microbiome (Taxa) at 5-6m
infant_taxa_56	1	Prevotellamassilia.sp900539625	5-6 months	-0.0477818	0.115071	Higher in Case	0.00549829	Infant Fecal Microbiome (Taxa) at 5-6m
infant_taxa_56	1	Prevotellamassilia.sp900540885	5-6 months	-0.0477818	0.115071	Higher in Case	0.00549829	Infant Fecal Microbiome (Taxa) at 5-6m
infant_taxa_56	1	Prevotellamassilia.sp900541575	5-6 months	-0.0477818	0.115071	Higher in Case	0.00549829	Infant Fecal Microbiome (Taxa) at 5-6m
infant_taxa_56	1	Prevotellamassilia.sp900542795	5-6 months	-0.0477818	0.115071	Higher in Case	0.00549829	Infant Fecal Microbiome (Taxa) at 5-6m
infant_taxa_56	1	Prevotellamassilia.sp900543155	5-6 months	-0.0477818	0.115071	Higher in Case	0.00549829	Infant Fecal Microbiome (Taxa) at 5-6m
infant_taxa_56	1	Prevotellamassilia.sp900546605	5-6 months	-0.0477818	0.115071	Higher in Case	0.00549829	Infant Fecal Microbiome (Taxa) at 5-6m
infant_taxa_56	1	Prevotellamassilia.timonensis	5-6 months	-0.0477818	0.115071	Higher in Case	0.00549829	Infant Fecal Microbiome (Taxa) at 5-6m
infant_taxa_56	1	Unknown_Prevotellamassilia	5-6 months	-0.0477818	0.115071	Higher in Case	0.00549829	Infant Fecal Microbiome (Taxa) at 5-6m
infant_taxa_56	1	Unknown_Prevotellamassilia.1	5-6 months	-0.0477818	0.115071	Higher in Case	0.00549829	Infant Fecal Microbiome (Taxa) at 5-6m
infant_taxa_56	1	Unknown_UBA4334	5-6 months	-0.0477818	0.115071	Higher in Case	0.00549829	Infant Fecal Microbiome (Taxa) at 5-6m
infant_taxa_56	1	UBA4372.sp900543815	5-6 months	-0.0477818	0.115071	Higher in Case	0.00549829	Infant Fecal Microbiome (Taxa) at 5-6m
infant_taxa_56	1	UBA6382.sp900557555	5-6 months	-0.0477818	0.115071	Higher in Case	0.00549829	Infant Fecal Microbiome (Taxa) at 5-6m
infant_taxa_56	1	UBA6398.sp003150315	5-6 months	-0.0477818	0.115071	Higher in Case	0.00549829	Infant Fecal Microbiome (Taxa) at 5-6m
infant_taxa_56	1	UBA6398.sp900550635	5-6 months	-0.0477818	0.115071	Higher in Case	0.00549829	Infant Fecal Microbiome (Taxa) at 5-6m
infant_taxa_56	1	Barnesiella.sp900542255	5-6 months	-0.0477818	0.115071	Higher in Case	0.00549829	Infant Fecal Microbiome (Taxa) at 5-6m
infant_taxa_56	1	Coprobacter.fastidiosus	5-6 months	-0.0477818	0.115071	Higher in Case	0.00549829	Infant Fecal Microbiome (Taxa) at 5-6m
infant_taxa_56	1	Coprobacter.secundus	5-6 months	-0.0477818	0.115071	Higher in Case	0.00549829	Infant Fecal Microbiome (Taxa) at 5-6m
infant_taxa_56	1	Dysgonomonas.capnocytophagoides	5-6 months	-0.0477818	0.115071	Higher in Case	0.00549829	Infant Fecal Microbiome (Taxa) at 5-6m
infant_taxa_56	1	Dysgonomonas.gadei	5-6 months	-0.0477818	0.115071	Higher in Case	0.00549829	Infant Fecal Microbiome (Taxa) at 5-6m
infant_taxa_56	1	Dysgonomonas.mossii	5-6 months	-0.0477818	0.115071	Higher in Case	0.00549829	Infant Fecal Microbiome (Taxa) at 5-6m
infant_taxa_56	1	Dysgonomonas.sp900079735	5-6 months	-0.0477818	0.115071	Higher in Case	0.00549829	Infant Fecal Microbiome (Taxa) at 5-6m
infant_taxa_56	1	F082.sp002633315	5-6 months	-0.0477818	0.115071	Higher in Case	0.00549829	Infant Fecal Microbiome (Taxa) at 5-6m
infant_taxa_56	1	Butyricimonas.faecalis	5-6 months	-0.0477818	0.115071	Higher in Case	0.00549829	Infant Fecal Microbiome (Taxa) at 5-6m
infant_taxa_56	1	Unknown_Butyricimonas	5-6 months	-0.0477818	0.115071	Higher in Case	0.00549829	Infant Fecal Microbiome (Taxa) at 5-6m
infant_taxa_56	1	Gabonibacter.massiliensis	5-6 months	-0.0477818	0.115071	Higher in Case	0.00549829	Infant Fecal Microbiome (Taxa) at 5-6m
infant_taxa_56	1	Odoribacter.massiliensis	5-6 months	-0.0477818	0.115071	Higher in Case	0.00549829	Infant Fecal Microbiome (Taxa) at 5-6m
infant_taxa_56	1	Odoribacter.sp900544025	5-6 months	-0.0477818	0.115071	Higher in Case	0.00549829	Infant Fecal Microbiome (Taxa) at 5-6m
infant_taxa_56	1	Odoribacter.splanchnicus	5-6 months	-0.0477818	0.115071	Higher in Case	0.00549829	Infant Fecal Microbiome (Taxa) at 5-6m
infant_taxa_56	1	C941.sp004557565	5-6 months	-0.0477818	0.115071	Higher in Case	0.00549829	Infant Fecal Microbiome (Taxa) at 5-6m
infant_taxa_56	1	C941.sp900321725	5-6 months	-0.0477818	0.115071	Higher in Case	0.00549829	Infant Fecal Microbiome (Taxa) at 5-6m
infant_taxa_56	1	Unknown_C941	5-6 months	-0.0477818	0.115071	Higher in Case	0.00549829	Infant Fecal Microbiome (Taxa) at 5-6m
infant_taxa_56	1	Unknown_C941.1	5-6 months	-0.0477818	0.115071	Higher in Case	0.00549829	Infant Fecal Microbiome (Taxa) at 5-6m
infant_taxa_56	1	Unknown_C941.2	5-6 months	-0.0477818	0.115071	Higher in Case	0.00549829	Infant Fecal Microbiome (Taxa) at 5-6m
infant_taxa_56	1	CAG.279.sp900544305	5-6 months	-0.0477818	0.115071	Higher in Case	0.00549829	Infant Fecal Microbiome (Taxa) at 5-6m
infant_taxa_56	1	CAG.485.sp001701295	5-6 months	-0.0477818	0.115071	Higher in Case	0.00549829	Infant Fecal Microbiome (Taxa) at 5-6m
infant_taxa_56	1	CAG.485.sp900550645	5-6 months	-0.0477818	0.115071	Higher in Case	0.00549829	Infant Fecal Microbiome (Taxa) at 5-6m
infant_taxa_56	1	CAG.873.sp001701165	5-6 months	-0.0477818	0.115071	Higher in Case	0.00549829	Infant Fecal Microbiome (Taxa) at 5-6m
infant_taxa_56	1	CAG.873.sp900540625	5-6 months	-0.0477818	0.115071	Higher in Case	0.00549829	Infant Fecal Microbiome (Taxa) at 5-6m
infant_taxa_56	1	CAG.873.sp900555715	5-6 months	-0.0477818	0.115071	Higher in Case	0.00549829	Infant Fecal Microbiome (Taxa) at 5-6m
infant_taxa_56	1	Unknown_CAG.873	5-6 months	-0.0477818	0.115071	Higher in Case	0.00549829	Infant Fecal Microbiome (Taxa) at 5-6m
infant_taxa_56	1	Muribaculum.sp002492595	5-6 months	-0.0477818	0.115071	Higher in Case	0.00549829	Infant Fecal Microbiome (Taxa) at 5-6m
infant_taxa_56	1	UBA7173.sp900545955	5-6 months	-0.0477818	0.115071	Higher in Case	0.00549829	Infant Fecal Microbiome (Taxa) at 5-6m
infant_taxa_56	1	Unknown_Muribaculaceae	5-6 months	-0.0477818	0.115071	Higher in Case	0.00549829	Infant Fecal Microbiome (Taxa) at 5-6m
infant_taxa_56	1	UBA3388.sp004551865	5-6 months	-0.0477818	0.115071	Higher in Case	0.00549829	Infant Fecal Microbiome (Taxa) at 5-6m
infant_taxa_56	1	UBA3388.sp900545215	5-6 months	-0.0477818	0.115071	Higher in Case	0.00549829	Infant Fecal Microbiome (Taxa) at 5-6m
infant_taxa_56	1	RF16.sp900556095	5-6 months	-0.0477818	0.115071	Higher in Case	0.00549829	Infant Fecal Microbiome (Taxa) at 5-6m
infant_taxa_56	1	Unknown_RF16	5-6 months	-0.0477818	0.115071	Higher in Case	0.00549829	Infant Fecal Microbiome (Taxa) at 5-6m
infant_taxa_56	1	Unknown_RF16.1	5-6 months	-0.0477818	0.115071	Higher in Case	0.00549829	Infant Fecal Microbiome (Taxa) at 5-6m
infant_taxa_56	1	Porphyromonas.asaccharolytica	5-6 months	-0.0477818	0.115071	Higher in Case	0.00549829	Infant Fecal Microbiome (Taxa) at 5-6m
infant_taxa_56	1	Porphyromonas.endodontalis	5-6 months	-0.0477818	0.115071	Higher in Case	0.00549829	Infant Fecal Microbiome (Taxa) at 5-6m
infant_taxa_56	1	Porphyromonas.sp900538385	5-6 months	-0.0477818	0.115071	Higher in Case	0.00549829	Infant Fecal Microbiome (Taxa) at 5-6m
infant_taxa_56	1	Porphyromonas.sp900539155	5-6 months	-0.0477818	0.115071	Higher in Case	0.00549829	Infant Fecal Microbiome (Taxa) at 5-6m
infant_taxa_56	1	Porphyromonas.sp900548415	5-6 months	-0.0477818	0.115071	Higher in Case	0.00549829	Infant Fecal Microbiome (Taxa) at 5-6m
infant_taxa_56	1	Porphyromonas.uenonis	5-6 months	-0.0477818	0.115071	Higher in Case	0.00549829	Infant Fecal Microbiome (Taxa) at 5-6m
infant_taxa_56	1	Porphyromonas.uenonis_A	5-6 months	-0.0477818	0.115071	Higher in Case	0.00549829	Infant Fecal Microbiome (Taxa) at 5-6m
infant_taxa_56	1	Unknown_Porphyromonas	5-6 months	-0.0477818	0.115071	Higher in Case	0.00549829	Infant Fecal Microbiome (Taxa) at 5-6m
infant_taxa_56	1	Unknown_Porphyromonas.1	5-6 months	-0.0477818	0.115071	Higher in Case	0.00549829	Infant Fecal Microbiome (Taxa) at 5-6m
infant_taxa_56	1	Unknown_Porphyromonas.2	5-6 months	-0.0477818	0.115071	Higher in Case	0.00549829	Infant Fecal Microbiome (Taxa) at 5-6m
infant_taxa_56	1	Unknown_Porphyromonas.3	5-6 months	-0.0477818	0.115071	Higher in Case	0.00549829	Infant Fecal Microbiome (Taxa) at 5-6m
infant_taxa_56	1	Porphyromonas_A.somerae	5-6 months	-0.0477818	0.115071	Higher in Case	0.00549829	Infant Fecal Microbiome (Taxa) at 5-6m
infant_taxa_56	1	Porphyromonas_A.sp001808555	5-6 months	-0.0477818	0.115071	Higher in Case	0.00549829	Infant Fecal Microbiome (Taxa) at 5-6m
infant_taxa_56	1	Alistipes.finegoldii	5-6 months	-0.0477818	0.115071	Higher in Case	0.00549829	Infant Fecal Microbiome (Taxa) at 5-6m
infant_taxa_56	1	Alistipes.obesi	5-6 months	-0.0477818	0.115071	Higher in Case	0.00549829	Infant Fecal Microbiome (Taxa) at 5-6m
infant_taxa_56	1	Alistipes.putredinis	5-6 months	-0.0477818	0.115071	Higher in Case	0.00549829	Infant Fecal Microbiome (Taxa) at 5-6m
infant_taxa_56	1	Alistipes.senegalensis	5-6 months	-0.0477818	0.115071	Higher in Case	0.00549829	Infant Fecal Microbiome (Taxa) at 5-6m
infant_taxa_56	1	Alistipes.shahii	5-6 months	-0.0477818	0.115071	Higher in Case	0.00549829	Infant Fecal Microbiome (Taxa) at 5-6m
infant_taxa_56	1	Alistipes.sp900083545	5-6 months	-0.0477818	0.115071	Higher in Case	0.00549829	Infant Fecal Microbiome (Taxa) at 5-6m
infant_taxa_56	1	Alistipes.sp900541585	5-6 months	-0.0477818	0.115071	Higher in Case	0.00549829	Infant Fecal Microbiome (Taxa) at 5-6m
infant_taxa_56	1	Alistipes.sp900546065	5-6 months	-0.0477818	0.115071	Higher in Case	0.00549829	Infant Fecal Microbiome (Taxa) at 5-6m
infant_taxa_56	1	Unknown_Alistipes	5-6 months	-0.0477818	0.115071	Higher in Case	0.00549829	Infant Fecal Microbiome (Taxa) at 5-6m
infant_taxa_56	1	Alistipes_A.ihumii	5-6 months	-0.0477818	0.115071	Higher in Case	0.00549829	Infant Fecal Microbiome (Taxa) at 5-6m
infant_taxa_56	1	Alistipes_A.sp900539755	5-6 months	-0.0477818	0.115071	Higher in Case	0.00549829	Infant Fecal Microbiome (Taxa) at 5-6m
infant_taxa_56	1	Tidjanibacter.inops	5-6 months	-0.0477818	0.115071	Higher in Case	0.00549829	Infant Fecal Microbiome (Taxa) at 5-6m
infant_taxa_56	1	Unknown_Rikenellaceae	5-6 months	-0.0477818	0.115071	Higher in Case	0.00549829	Infant Fecal Microbiome (Taxa) at 5-6m
infant_taxa_56	1	Unknown_Rikenellaceae.1	5-6 months	-0.0477818	0.115071	Higher in Case	0.00549829	Infant Fecal Microbiome (Taxa) at 5-6m
infant_taxa_56	1	Parabacteroides.bouchesdurhonensis	5-6 months	-0.0477818	0.115071	Higher in Case	0.00549829	Infant Fecal Microbiome (Taxa) at 5-6m
infant_taxa_56	1	Parabacteroides.chinchillae	5-6 months	-0.0477818	0.115071	Higher in Case	0.00549829	Infant Fecal Microbiome (Taxa) at 5-6m
infant_taxa_56	1	Parabacteroides.gordonii	5-6 months	-0.0477818	0.115071	Higher in Case	0.00549829	Infant Fecal Microbiome (Taxa) at 5-6m
infant_taxa_56	1	Parabacteroides.sp000436495	5-6 months	-0.0477818	0.115071	Higher in Case	0.00549829	Infant Fecal Microbiome (Taxa) at 5-6m
infant_taxa_56	1	Parabacteroides.sp900155425	5-6 months	-0.0477818	0.115071	Higher in Case	0.00549829	Infant Fecal Microbiome (Taxa) at 5-6m
infant_taxa_56	1	Parabacteroides.sp900541965	5-6 months	-0.0477818	0.115071	Higher in Case	0.00549829	Infant Fecal Microbiome (Taxa) at 5-6m
infant_taxa_56	1	Parabacteroides.sp900549585	5-6 months	-0.0477818	0.115071	Higher in Case	0.00549829	Infant Fecal Microbiome (Taxa) at 5-6m
infant_taxa_56	1	Unknown_Parabacteroides	5-6 months	-0.0477818	0.115071	Higher in Case	0.00549829	Infant Fecal Microbiome (Taxa) at 5-6m
infant_taxa_56	1	Unknown_Parabacteroides.1	5-6 months	-0.0477818	0.115071	Higher in Case	0.00549829	Infant Fecal Microbiome (Taxa) at 5-6m
infant_taxa_56	1	Unknown_Parabacteroides.2	5-6 months	-0.0477818	0.115071	Higher in Case	0.00549829	Infant Fecal Microbiome (Taxa) at 5-6m
infant_taxa_56	1	UBA11471.sp000434215	5-6 months	-0.0477818	0.115071	Higher in Case	0.00549829	Infant Fecal Microbiome (Taxa) at 5-6m
infant_taxa_56	1	UBA11471.sp900542765	5-6 months	-0.0477818	0.115071	Higher in Case	0.00549829	Infant Fecal Microbiome (Taxa) at 5-6m
infant_taxa_56	1	RC9.sp000431015	5-6 months	-0.0477818	0.115071	Higher in Case	0.00549829	Infant Fecal Microbiome (Taxa) at 5-6m
infant_taxa_56	1	RC9.sp000432515	5-6 months	-0.0477818	0.115071	Higher in Case	0.00549829	Infant Fecal Microbiome (Taxa) at 5-6m
infant_taxa_56	1	RC9.sp000432655	5-6 months	-0.0477818	0.115071	Higher in Case	0.00549829	Infant Fecal Microbiome (Taxa) at 5-6m
infant_taxa_56	1	RC9.sp000433355	5-6 months	-0.0477818	0.115071	Higher in Case	0.00549829	Infant Fecal Microbiome (Taxa) at 5-6m
infant_taxa_56	1	RC9.sp000434935	5-6 months	-0.0477818	0.115071	Higher in Case	0.00549829	Infant Fecal Microbiome (Taxa) at 5-6m
infant_taxa_56	1	RC9.sp000435075	5-6 months	-0.0477818	0.115071	Higher in Case	0.00549829	Infant Fecal Microbiome (Taxa) at 5-6m
infant_taxa_56	1	RC9.sp900541925	5-6 months	-0.0477818	0.115071	Higher in Case	0.00549829	Infant Fecal Microbiome (Taxa) at 5-6m
infant_taxa_56	1	RC9.sp900544195	5-6 months	-0.0477818	0.115071	Higher in Case	0.00549829	Infant Fecal Microbiome (Taxa) at 5-6m
infant_taxa_56	1	RC9.sp900545245	5-6 months	-0.0477818	0.115071	Higher in Case	0.00549829	Infant Fecal Microbiome (Taxa) at 5-6m
infant_taxa_56	1	RC9.sp900546445	5-6 months	-0.0477818	0.115071	Higher in Case	0.00549829	Infant Fecal Microbiome (Taxa) at 5-6m
infant_taxa_56	1	RC9.sp900546925	5-6 months	-0.0477818	0.115071	Higher in Case	0.00549829	Infant Fecal Microbiome (Taxa) at 5-6m
infant_taxa_56	1	Unknown_RC9	5-6 months	-0.0477818	0.115071	Higher in Case	0.00549829	Infant Fecal Microbiome (Taxa) at 5-6m
infant_taxa_56	1	Unknown_RC9.1	5-6 months	-0.0477818	0.115071	Higher in Case	0.00549829	Infant Fecal Microbiome (Taxa) at 5-6m
infant_taxa_56	1	UBA1232.sp900544815	5-6 months	-0.0477818	0.115071	Higher in Case	0.00549829	Infant Fecal Microbiome (Taxa) at 5-6m
infant_taxa_56	1	Unknown_Bacteroidales	5-6 months	-0.0477818	0.115071	Higher in Case	0.00549829	Infant Fecal Microbiome (Taxa) at 5-6m
infant_taxa_56	1	UBA1820.sp002314265	5-6 months	-0.0477818	0.115071	Higher in Case	0.00549829	Infant Fecal Microbiome (Taxa) at 5-6m
infant_taxa_56	1	UBA1820.sp003150615	5-6 months	-0.0477818	0.115071	Higher in Case	0.00549829	Infant Fecal Microbiome (Taxa) at 5-6m
infant_taxa_56	1	Unknown_UBA1820	5-6 months	-0.0477818	0.115071	Higher in Case	0.00549829	Infant Fecal Microbiome (Taxa) at 5-6m
infant_taxa_56	1	Campylobacter_A.curvus	5-6 months	-0.0477818	0.115071	Higher in Case	0.00549829	Infant Fecal Microbiome (Taxa) at 5-6m
infant_taxa_56	1	Campylobacter_B.hominis	5-6 months	-0.0477818	0.115071	Higher in Case	0.00549829	Infant Fecal Microbiome (Taxa) at 5-6m
infant_taxa_56	1	Campylobacter_D.sp900539255	5-6 months	-0.0477818	0.115071	Higher in Case	0.00549829	Infant Fecal Microbiome (Taxa) at 5-6m
infant_taxa_56	1	Unknown_Campylobacter_D	5-6 months	-0.0477818	0.115071	Higher in Case	0.00549829	Infant Fecal Microbiome (Taxa) at 5-6m
infant_taxa_56	1	Helicobacter_C.magdeburgensis	5-6 months	-0.0477818	0.115071	Higher in Case	0.00549829	Infant Fecal Microbiome (Taxa) at 5-6m
infant_taxa_56	1	Unknown_Helicobacteraceae	5-6 months	-0.0477818	0.115071	Higher in Case	0.00549829	Infant Fecal Microbiome (Taxa) at 5-6m
infant_taxa_56	1	CAG.196.sp002102975	5-6 months	-0.0477818	0.115071	Higher in Case	0.00549829	Infant Fecal Microbiome (Taxa) at 5-6m
infant_taxa_56	1	CAG.196.sp900549855	5-6 months	-0.0477818	0.115071	Higher in Case	0.00549829	Infant Fecal Microbiome (Taxa) at 5-6m
infant_taxa_56	1	CAG.196.sp900553895	5-6 months	-0.0477818	0.115071	Higher in Case	0.00549829	Infant Fecal Microbiome (Taxa) at 5-6m
infant_taxa_56	1	Unknown_CAG.196	5-6 months	-0.0477818	0.115071	Higher in Case	0.00549829	Infant Fecal Microbiome (Taxa) at 5-6m
infant_taxa_56	1	Unknown_CAG.196.1	5-6 months	-0.0477818	0.115071	Higher in Case	0.00549829	Infant Fecal Microbiome (Taxa) at 5-6m
infant_taxa_56	1	Unknown_CAG.196.2	5-6 months	-0.0477818	0.115071	Higher in Case	0.00549829	Infant Fecal Microbiome (Taxa) at 5-6m
infant_taxa_56	1	Unknown_CAG.196.3	5-6 months	-0.0477818	0.115071	Higher in Case	0.00549829	Infant Fecal Microbiome (Taxa) at 5-6m
infant_taxa_56	1	Unknown_CAG.196.4	5-6 months	-0.0477818	0.115071	Higher in Case	0.00549829	Infant Fecal Microbiome (Taxa) at 5-6m
infant_taxa_56	1	Unknown_CAG.196.5	5-6 months	-0.0477818	0.115071	Higher in Case	0.00549829	Infant Fecal Microbiome (Taxa) at 5-6m
infant_taxa_56	1	Unknown_CAG.196.6	5-6 months	-0.0477818	0.115071	Higher in Case	0.00549829	Infant Fecal Microbiome (Taxa) at 5-6m
infant_taxa_56	1	Unknown_CAG.196.7	5-6 months	-0.0477818	0.115071	Higher in Case	0.00549829	Infant Fecal Microbiome (Taxa) at 5-6m
infant_taxa_56	1	Unknown_CAG.196.8	5-6 months	-0.0477818	0.115071	Higher in Case	0.00549829	Infant Fecal Microbiome (Taxa) at 5-6m
infant_taxa_56	1	Unknown_CAG.196.9	5-6 months	-0.0477818	0.115071	Higher in Case	0.00549829	Infant Fecal Microbiome (Taxa) at 5-6m
infant_taxa_56	1	Unknown_CAG.196.10	5-6 months	-0.0477818	0.115071	Higher in Case	0.00549829	Infant Fecal Microbiome (Taxa) at 5-6m
infant_taxa_56	1	Unknown_CAG.196.11	5-6 months	-0.0477818	0.115071	Higher in Case	0.00549829	Infant Fecal Microbiome (Taxa) at 5-6m
infant_taxa_56	1	Unknown_CAG.196.12	5-6 months	-0.0477818	0.115071	Higher in Case	0.00549829	Infant Fecal Microbiome (Taxa) at 5-6m
infant_taxa_56	1	CAG.306.sp000980375	5-6 months	-0.0477818	0.115071	Higher in Case	0.00549829	Infant Fecal Microbiome (Taxa) at 5-6m
infant_taxa_56	1	CAG.484.sp900321895	5-6 months	-0.0477818	0.115071	Higher in Case	0.00549829	Infant Fecal Microbiome (Taxa) at 5-6m
infant_taxa_56	1	QAMI01.sp003150395	5-6 months	-0.0477818	0.115071	Higher in Case	0.00549829	Infant Fecal Microbiome (Taxa) at 5-6m
infant_taxa_56	1	QHMH01.sp003258795	5-6 months	-0.0477818	0.115071	Higher in Case	0.00549829	Infant Fecal Microbiome (Taxa) at 5-6m
infant_taxa_56	1	RUG841.sp900313795	5-6 months	-0.0477818	0.115071	Higher in Case	0.00549829	Infant Fecal Microbiome (Taxa) at 5-6m
infant_taxa_56	1	Unknown_RUG841	5-6 months	-0.0477818	0.115071	Higher in Case	0.00549829	Infant Fecal Microbiome (Taxa) at 5-6m
infant_taxa_56	1	Unknown_RUG841.1	5-6 months	-0.0477818	0.115071	Higher in Case	0.00549829	Infant Fecal Microbiome (Taxa) at 5-6m
infant_taxa_56	1	Unknown_RUG841.2	5-6 months	-0.0477818	0.115071	Higher in Case	0.00549829	Infant Fecal Microbiome (Taxa) at 5-6m
infant_taxa_56	1	UBA2883.sp002103075	5-6 months	-0.0477818	0.115071	Higher in Case	0.00549829	Infant Fecal Microbiome (Taxa) at 5-6m
infant_taxa_56	1	Unknown_UBA2883	5-6 months	-0.0477818	0.115071	Higher in Case	0.00549829	Infant Fecal Microbiome (Taxa) at 5-6m
infant_taxa_56	1	Unknown_UBA2883.1	5-6 months	-0.0477818	0.115071	Higher in Case	0.00549829	Infant Fecal Microbiome (Taxa) at 5-6m
infant_taxa_56	1	Unknown_UBA2883.2	5-6 months	-0.0477818	0.115071	Higher in Case	0.00549829	Infant Fecal Microbiome (Taxa) at 5-6m
infant_taxa_56	1	UBA6984.sp003258725	5-6 months	-0.0477818	0.115071	Higher in Case	0.00549829	Infant Fecal Microbiome (Taxa) at 5-6m
infant_taxa_56	1	UBA6984.sp900550295	5-6 months	-0.0477818	0.115071	Higher in Case	0.00549829	Infant Fecal Microbiome (Taxa) at 5-6m
infant_taxa_56	1	Unknown_UBA6984	5-6 months	-0.0477818	0.115071	Higher in Case	0.00549829	Infant Fecal Microbiome (Taxa) at 5-6m
infant_taxa_56	1	Unknown_UBA6984.1	5-6 months	-0.0477818	0.115071	Higher in Case	0.00549829	Infant Fecal Microbiome (Taxa) at 5-6m
infant_taxa_56	1	Unknown_UBA791	5-6 months	-0.0477818	0.115071	Higher in Case	0.00549829	Infant Fecal Microbiome (Taxa) at 5-6m
infant_taxa_56	1	Unknown_UBA791.1	5-6 months	-0.0477818	0.115071	Higher in Case	0.00549829	Infant Fecal Microbiome (Taxa) at 5-6m
infant_taxa_56	1	UMGS1477.sp900552205	5-6 months	-0.0477818	0.115071	Higher in Case	0.00549829	Infant Fecal Microbiome (Taxa) at 5-6m
infant_taxa_56	1	Unknown_UMGS1477	5-6 months	-0.0477818	0.115071	Higher in Case	0.00549829	Infant Fecal Microbiome (Taxa) at 5-6m
infant_taxa_56	1	Unknown_UMGS1477.1	5-6 months	-0.0477818	0.115071	Higher in Case	0.00549829	Infant Fecal Microbiome (Taxa) at 5-6m
infant_taxa_56	1	UMGS1585.sp900553205	5-6 months	-0.0477818	0.115071	Higher in Case	0.00549829	Infant Fecal Microbiome (Taxa) at 5-6m
infant_taxa_56	1	Unknown_UMGS1585	5-6 months	-0.0477818	0.115071	Higher in Case	0.00549829	Infant Fecal Microbiome (Taxa) at 5-6m
infant_taxa_56	1	Unknown_Gastranaerophilaceae	5-6 months	-0.0477818	0.115071	Higher in Case	0.00549829	Infant Fecal Microbiome (Taxa) at 5-6m
infant_taxa_56	1	Unknown_Gastranaerophilaceae.1	5-6 months	-0.0477818	0.115071	Higher in Case	0.00549829	Infant Fecal Microbiome (Taxa) at 5-6m
infant_taxa_56	1	Unknown_Gastranaerophilaceae.2	5-6 months	-0.0477818	0.115071	Higher in Case	0.00549829	Infant Fecal Microbiome (Taxa) at 5-6m
infant_taxa_56	1	Unknown_Gastranaerophilaceae.3	5-6 months	-0.0477818	0.115071	Higher in Case	0.00549829	Infant Fecal Microbiome (Taxa) at 5-6m
infant_taxa_56	1	Unknown_Gastranaerophilaceae.4	5-6 months	-0.0477818	0.115071	Higher in Case	0.00549829	Infant Fecal Microbiome (Taxa) at 5-6m
infant_taxa_56	1	Unknown_Zag1	5-6 months	-0.0477818	0.115071	Higher in Case	0.00549829	Infant Fecal Microbiome (Taxa) at 5-6m
infant_taxa_56	1	Unknown_Zag1.1	5-6 months	-0.0477818	0.115071	Higher in Case	0.00549829	Infant Fecal Microbiome (Taxa) at 5-6m
infant_taxa_56	1	Unknown_Zag1.2	5-6 months	-0.0477818	0.115071	Higher in Case	0.00549829	Infant Fecal Microbiome (Taxa) at 5-6m
infant_taxa_56	1	Unknown_Zag1.3	5-6 months	-0.0477818	0.115071	Higher in Case	0.00549829	Infant Fecal Microbiome (Taxa) at 5-6m
infant_taxa_56	1	Unknown_Zag1.4	5-6 months	-0.0477818	0.115071	Higher in Case	0.00549829	Infant Fecal Microbiome (Taxa) at 5-6m
infant_taxa_56	1	Unknown_Zag1.5	5-6 months	-0.0477818	0.115071	Higher in Case	0.00549829	Infant Fecal Microbiome (Taxa) at 5-6m
infant_taxa_56	1	Unknown_Zag1.6	5-6 months	-0.0477818	0.115071	Higher in Case	0.00549829	Infant Fecal Microbiome (Taxa) at 5-6m
infant_taxa_56	1	Unknown_Zag1.7	5-6 months	-0.0477818	0.115071	Higher in Case	0.00549829	Infant Fecal Microbiome (Taxa) at 5-6m
infant_taxa_56	1	Unknown_Zag1.8	5-6 months	-0.0477818	0.115071	Higher in Case	0.00549829	Infant Fecal Microbiome (Taxa) at 5-6m
infant_taxa_56	1	Unknown_Zag1.9	5-6 months	-0.0477818	0.115071	Higher in Case	0.00549829	Infant Fecal Microbiome (Taxa) at 5-6m
infant_taxa_56	1	Zag1.sp001765415	5-6 months	-0.0477818	0.115071	Higher in Case	0.00549829	Infant Fecal Microbiome (Taxa) at 5-6m
infant_taxa_56	1	Zag1.sp900556295	5-6 months	-0.0477818	0.115071	Higher in Case	0.00549829	Infant Fecal Microbiome (Taxa) at 5-6m
infant_taxa_56	1	Unknown_Zag111	5-6 months	-0.0477818	0.115071	Higher in Case	0.00549829	Infant Fecal Microbiome (Taxa) at 5-6m
infant_taxa_56	1	Unknown_Zag111.1	5-6 months	-0.0477818	0.115071	Higher in Case	0.00549829	Infant Fecal Microbiome (Taxa) at 5-6m
infant_taxa_56	1	Unknown_Zag111.2	5-6 months	-0.0477818	0.115071	Higher in Case	0.00549829	Infant Fecal Microbiome (Taxa) at 5-6m
infant_taxa_56	1	Zag111.sp002102825	5-6 months	-0.0477818	0.115071	Higher in Case	0.00549829	Infant Fecal Microbiome (Taxa) at 5-6m
infant_taxa_56	1	Zag111.sp002103105	5-6 months	-0.0477818	0.115071	Higher in Case	0.00549829	Infant Fecal Microbiome (Taxa) at 5-6m
infant_taxa_56	1	Zag111.sp003258735	5-6 months	-0.0477818	0.115071	Higher in Case	0.00549829	Infant Fecal Microbiome (Taxa) at 5-6m
infant_taxa_56	1	Zag111.sp004558955	5-6 months	-0.0477818	0.115071	Higher in Case	0.00549829	Infant Fecal Microbiome (Taxa) at 5-6m
infant_taxa_56	1	Unknown_Gastranaerophilales	5-6 months	-0.0477818	0.115071	Higher in Case	0.00549829	Infant Fecal Microbiome (Taxa) at 5-6m
infant_taxa_56	1	Unknown_Gastranaerophilales.1	5-6 months	-0.0477818	0.115071	Higher in Case	0.00549829	Infant Fecal Microbiome (Taxa) at 5-6m
infant_taxa_56	1	Unknown_Gastranaerophilales.2	5-6 months	-0.0477818	0.115071	Higher in Case	0.00549829	Infant Fecal Microbiome (Taxa) at 5-6m
infant_taxa_56	1	Bilophila.sp900553145	5-6 months	-0.0477818	0.115071	Higher in Case	0.00549829	Infant Fecal Microbiome (Taxa) at 5-6m
infant_taxa_56	1	Desulfovibrio.fairfieldensis	5-6 months	-0.0477818	0.115071	Higher in Case	0.00549829	Infant Fecal Microbiome (Taxa) at 5-6m
infant_taxa_56	1	Desulfovibrio.piger	5-6 months	-0.0477818	0.115071	Higher in Case	0.00549829	Infant Fecal Microbiome (Taxa) at 5-6m
infant_taxa_56	1	Desulfovibrio.piger_A	5-6 months	-0.0477818	0.115071	Higher in Case	0.00549829	Infant Fecal Microbiome (Taxa) at 5-6m
infant_taxa_56	1	Desulfovibrio.sp900319575	5-6 months	-0.0477818	0.115071	Higher in Case	0.00549829	Infant Fecal Microbiome (Taxa) at 5-6m
infant_taxa_56	1	Desulfovibrio.sp900540515	5-6 months	-0.0477818	0.115071	Higher in Case	0.00549829	Infant Fecal Microbiome (Taxa) at 5-6m
infant_taxa_56	1	Unknown_Desulfovibrio	5-6 months	-0.0477818	0.115071	Higher in Case	0.00549829	Infant Fecal Microbiome (Taxa) at 5-6m
infant_taxa_56	1	Unknown_Desulfovibrio.1	5-6 months	-0.0477818	0.115071	Higher in Case	0.00549829	Infant Fecal Microbiome (Taxa) at 5-6m
infant_taxa_56	1	Mailhella.sp003150275	5-6 months	-0.0477818	0.115071	Higher in Case	0.00549829	Infant Fecal Microbiome (Taxa) at 5-6m
infant_taxa_56	1	UBA1174.sp900556855	5-6 months	-0.0477818	0.115071	Higher in Case	0.00549829	Infant Fecal Microbiome (Taxa) at 5-6m
infant_taxa_56	1	UBA1436.sp002329395	5-6 months	-0.0477818	0.115071	Higher in Case	0.00549829	Infant Fecal Microbiome (Taxa) at 5-6m
infant_taxa_56	1	UBA1436.sp900540405	5-6 months	-0.0477818	0.115071	Higher in Case	0.00549829	Infant Fecal Microbiome (Taxa) at 5-6m
infant_taxa_56	1	UBA1436.sp900541355	5-6 months	-0.0477818	0.115071	Higher in Case	0.00549829	Infant Fecal Microbiome (Taxa) at 5-6m
infant_taxa_56	1	Unknown_UBA1436	5-6 months	-0.0477818	0.115071	Higher in Case	0.00549829	Infant Fecal Microbiome (Taxa) at 5-6m
infant_taxa_56	1	Unknown_UBA1436.1	5-6 months	-0.0477818	0.115071	Higher in Case	0.00549829	Infant Fecal Microbiome (Taxa) at 5-6m
infant_taxa_56	1	Unknown_UBA1436.2	5-6 months	-0.0477818	0.115071	Higher in Case	0.00549829	Infant Fecal Microbiome (Taxa) at 5-6m
infant_taxa_56	1	Unknown_Elusimicrobiaceae	5-6 months	-0.0477818	0.115071	Higher in Case	0.00549829	Infant Fecal Microbiome (Taxa) at 5-6m
infant_taxa_56	1	UBA4705.sp004554425	5-6 months	-0.0477818	0.115071	Higher in Case	0.00549829	Infant Fecal Microbiome (Taxa) at 5-6m
infant_taxa_56	1	Unknown_Fibrobacteraceae	5-6 months	-0.0477818	0.115071	Higher in Case	0.00549829	Infant Fecal Microbiome (Taxa) at 5-6m
infant_taxa_56	1	CAG.307.sp001916215	5-6 months	-0.0477818	0.115071	Higher in Case	0.00549829	Infant Fecal Microbiome (Taxa) at 5-6m
infant_taxa_56	1	Unknown_Anaeroplasmataceae	5-6 months	-0.0477818	0.115071	Higher in Case	0.00549829	Infant Fecal Microbiome (Taxa) at 5-6m
infant_taxa_56	1	Unknown_Anaeroplasmataceae.1	5-6 months	-0.0477818	0.115071	Higher in Case	0.00549829	Infant Fecal Microbiome (Taxa) at 5-6m
infant_taxa_56	1	Unknown_Anaeroplasmataceae.2	5-6 months	-0.0477818	0.115071	Higher in Case	0.00549829	Infant Fecal Microbiome (Taxa) at 5-6m
infant_taxa_56	1	Bacillus.subtilis	5-6 months	-0.0477818	0.115071	Higher in Case	0.00549829	Infant Fecal Microbiome (Taxa) at 5-6m
infant_taxa_56	1	Beduini.sp900550005	5-6 months	-0.0477818	0.115071	Higher in Case	0.00549829	Infant Fecal Microbiome (Taxa) at 5-6m
infant_taxa_56	1	Catenibacterium.mitsuokai	5-6 months	-0.0477818	0.115071	Higher in Case	0.00549829	Infant Fecal Microbiome (Taxa) at 5-6m
infant_taxa_56	1	Catenibacterium.sp000437715	5-6 months	-0.0477818	0.115071	Higher in Case	0.00549829	Infant Fecal Microbiome (Taxa) at 5-6m
infant_taxa_56	1	Catenibacterium.sp900540685	5-6 months	-0.0477818	0.115071	Higher in Case	0.00549829	Infant Fecal Microbiome (Taxa) at 5-6m
infant_taxa_56	1	Unknown_Catenibacterium	5-6 months	-0.0477818	0.115071	Higher in Case	0.00549829	Infant Fecal Microbiome (Taxa) at 5-6m
infant_taxa_56	1	Coprobacillus.cateniformis	5-6 months	-0.0477818	0.115071	Higher in Case	0.00549829	Infant Fecal Microbiome (Taxa) at 5-6m
infant_taxa_56	1	Erysipelatoclostridium.sp000752095	5-6 months	-0.0477818	0.115071	Higher in Case	0.00549829	Infant Fecal Microbiome (Taxa) at 5-6m
infant_taxa_56	1	Erysipelatoclostridium.sp002160495	5-6 months	-0.0477818	0.115071	Higher in Case	0.00549829	Infant Fecal Microbiome (Taxa) at 5-6m
infant_taxa_56	1	Erysipelatoclostridium.sp003024675	5-6 months	-0.0477818	0.115071	Higher in Case	0.00549829	Infant Fecal Microbiome (Taxa) at 5-6m
infant_taxa_56	1	Erysipelatoclostridium.sp900544435	5-6 months	-0.0477818	0.115071	Higher in Case	0.00549829	Infant Fecal Microbiome (Taxa) at 5-6m
infant_taxa_56	1	Massiliomicrobiota.sp002160815	5-6 months	-0.0477818	0.115071	Higher in Case	0.00549829	Infant Fecal Microbiome (Taxa) at 5-6m
infant_taxa_56	1	Bulleidia.moorei	5-6 months	-0.0477818	0.115071	Higher in Case	0.00549829	Infant Fecal Microbiome (Taxa) at 5-6m
infant_taxa_56	1	Bulleidia.sp900539965	5-6 months	-0.0477818	0.115071	Higher in Case	0.00549829	Infant Fecal Microbiome (Taxa) at 5-6m
infant_taxa_56	1	Unknown_Bulleidia	5-6 months	-0.0477818	0.115071	Higher in Case	0.00549829	Infant Fecal Microbiome (Taxa) at 5-6m
infant_taxa_56	1	Unknown_Bulleidia.1	5-6 months	-0.0477818	0.115071	Higher in Case	0.00549829	Infant Fecal Microbiome (Taxa) at 5-6m
infant_taxa_56	1	Unknown_Bulleidia.2	5-6 months	-0.0477818	0.115071	Higher in Case	0.00549829	Infant Fecal Microbiome (Taxa) at 5-6m
infant_taxa_56	1	Faecalicoccus.pleomorphus	5-6 months	-0.0477818	0.115071	Higher in Case	0.00549829	Infant Fecal Microbiome (Taxa) at 5-6m
infant_taxa_56	1	Faecalicoccus.sp900546545	5-6 months	-0.0477818	0.115071	Higher in Case	0.00549829	Infant Fecal Microbiome (Taxa) at 5-6m
infant_taxa_56	1	Holdemanella.biformis	5-6 months	-0.0477818	0.115071	Higher in Case	0.00549829	Infant Fecal Microbiome (Taxa) at 5-6m
infant_taxa_56	1	Holdemanella.sp002299315	5-6 months	-0.0477818	0.115071	Higher in Case	0.00549829	Infant Fecal Microbiome (Taxa) at 5-6m
infant_taxa_56	1	Holdemanella.sp003436425	5-6 months	-0.0477818	0.115071	Higher in Case	0.00549829	Infant Fecal Microbiome (Taxa) at 5-6m
infant_taxa_56	1	Holdemanella.sp003458715	5-6 months	-0.0477818	0.115071	Higher in Case	0.00549829	Infant Fecal Microbiome (Taxa) at 5-6m
infant_taxa_56	1	Holdemanella.sp900547815	5-6 months	-0.0477818	0.115071	Higher in Case	0.00549829	Infant Fecal Microbiome (Taxa) at 5-6m
infant_taxa_56	1	Unknown_Holdemanella	5-6 months	-0.0477818	0.115071	Higher in Case	0.00549829	Infant Fecal Microbiome (Taxa) at 5-6m
infant_taxa_56	1	Unknown_Holdemanella.1	5-6 months	-0.0477818	0.115071	Higher in Case	0.00549829	Infant Fecal Microbiome (Taxa) at 5-6m
infant_taxa_56	1	Unknown_Holdemanella.2	5-6 months	-0.0477818	0.115071	Higher in Case	0.00549829	Infant Fecal Microbiome (Taxa) at 5-6m
infant_taxa_56	1	Holdemania.filiformis	5-6 months	-0.0477818	0.115071	Higher in Case	0.00549829	Infant Fecal Microbiome (Taxa) at 5-6m
infant_taxa_56	1	Holdemania.massiliensis	5-6 months	-0.0477818	0.115071	Higher in Case	0.00549829	Infant Fecal Microbiome (Taxa) at 5-6m
infant_taxa_56	1	Longicatena.innocuum	5-6 months	-0.0477818	0.115071	Higher in Case	0.00549829	Infant Fecal Microbiome (Taxa) at 5-6m
infant_taxa_56	1	Unknown_Merdibacter	5-6 months	-0.0477818	0.115071	Higher in Case	0.00549829	Infant Fecal Microbiome (Taxa) at 5-6m
infant_taxa_56	1	UBA636.sp900546285	5-6 months	-0.0477818	0.115071	Higher in Case	0.00549829	Infant Fecal Microbiome (Taxa) at 5-6m
infant_taxa_56	1	Unknown_UBA636	5-6 months	-0.0477818	0.115071	Higher in Case	0.00549829	Infant Fecal Microbiome (Taxa) at 5-6m
infant_taxa_56	1	Unknown_UBA636.1	5-6 months	-0.0477818	0.115071	Higher in Case	0.00549829	Infant Fecal Microbiome (Taxa) at 5-6m
infant_taxa_56	1	Turicibacter.sanguinis	5-6 months	-0.0477818	0.115071	Higher in Case	0.00549829	Infant Fecal Microbiome (Taxa) at 5-6m
infant_taxa_56	1	Turicibacter.sp001543345	5-6 months	-0.0477818	0.115071	Higher in Case	0.00549829	Infant Fecal Microbiome (Taxa) at 5-6m
infant_taxa_56	1	Enterococcus_C.asini	5-6 months	-0.0477818	0.115071	Higher in Case	0.00549829	Infant Fecal Microbiome (Taxa) at 5-6m
infant_taxa_56	1	Enterococcus_D.casseliflavus	5-6 months	-0.0477818	0.115071	Higher in Case	0.00549829	Infant Fecal Microbiome (Taxa) at 5-6m
infant_taxa_56	1	Lacticaseibacillus.paracasei	5-6 months	-0.0477818	0.115071	Higher in Case	0.00549829	Infant Fecal Microbiome (Taxa) at 5-6m
infant_taxa_56	1	Lacticaseibacillus.rhamnosus	5-6 months	-0.0477818	0.115071	Higher in Case	0.00549829	Infant Fecal Microbiome (Taxa) at 5-6m
infant_taxa_56	1	Lactobacillus.amylovorus	5-6 months	-0.0477818	0.115071	Higher in Case	0.00549829	Infant Fecal Microbiome (Taxa) at 5-6m
infant_taxa_56	1	Lactobacillus.delbrueckii	5-6 months	-0.0477818	0.115071	Higher in Case	0.00549829	Infant Fecal Microbiome (Taxa) at 5-6m
infant_taxa_56	1	Lactobacillus.iners	5-6 months	-0.0477818	0.115071	Higher in Case	0.00549829	Infant Fecal Microbiome (Taxa) at 5-6m
infant_taxa_56	1	Leuconostoc.sp900554745	5-6 months	-0.0477818	0.115071	Higher in Case	0.00549829	Infant Fecal Microbiome (Taxa) at 5-6m
infant_taxa_56	1	Ligilactobacillus.agilis	5-6 months	-0.0477818	0.115071	Higher in Case	0.00549829	Infant Fecal Microbiome (Taxa) at 5-6m
infant_taxa_56	1	Ligilactobacillus.salivarius	5-6 months	-0.0477818	0.115071	Higher in Case	0.00549829	Infant Fecal Microbiome (Taxa) at 5-6m
infant_taxa_56	1	Limosilactobacillus.pontis	5-6 months	-0.0477818	0.115071	Higher in Case	0.00549829	Infant Fecal Microbiome (Taxa) at 5-6m
infant_taxa_56	1	Limosilactobacillus.reuteri	5-6 months	-0.0477818	0.115071	Higher in Case	0.00549829	Infant Fecal Microbiome (Taxa) at 5-6m
infant_taxa_56	1	Limosilactobacillus.sp900557215	5-6 months	-0.0477818	0.115071	Higher in Case	0.00549829	Infant Fecal Microbiome (Taxa) at 5-6m
infant_taxa_56	1	Pediococcus.acidilactici	5-6 months	-0.0477818	0.115071	Higher in Case	0.00549829	Infant Fecal Microbiome (Taxa) at 5-6m
infant_taxa_56	1	Schleiferilactobacillus.harbinensis	5-6 months	-0.0477818	0.115071	Higher in Case	0.00549829	Infant Fecal Microbiome (Taxa) at 5-6m
infant_taxa_56	1	Weissella.cibaria	5-6 months	-0.0477818	0.115071	Higher in Case	0.00549829	Infant Fecal Microbiome (Taxa) at 5-6m
infant_taxa_56	1	Lactococcus.garvieae_B	5-6 months	-0.0477818	0.115071	Higher in Case	0.00549829	Infant Fecal Microbiome (Taxa) at 5-6m
infant_taxa_56	1	Lactococcus.lactis	5-6 months	-0.0477818	0.115071	Higher in Case	0.00549829	Infant Fecal Microbiome (Taxa) at 5-6m
infant_taxa_56	1	Lactococcus.lactis_A	5-6 months	-0.0477818	0.115071	Higher in Case	0.00549829	Infant Fecal Microbiome (Taxa) at 5-6m
infant_taxa_56	1	Lactococcus.petauri	5-6 months	-0.0477818	0.115071	Higher in Case	0.00549829	Infant Fecal Microbiome (Taxa) at 5-6m
infant_taxa_56	1	Streptococcus.anginosus	5-6 months	-0.0477818	0.115071	Higher in Case	0.00549829	Infant Fecal Microbiome (Taxa) at 5-6m
infant_taxa_56	1	Streptococcus.anginosus_C	5-6 months	-0.0477818	0.115071	Higher in Case	0.00549829	Infant Fecal Microbiome (Taxa) at 5-6m
infant_taxa_56	1	Streptococcus.constellatus	5-6 months	-0.0477818	0.115071	Higher in Case	0.00549829	Infant Fecal Microbiome (Taxa) at 5-6m
infant_taxa_56	1	Streptococcus.gordonii	5-6 months	-0.0477818	0.115071	Higher in Case	0.00549829	Infant Fecal Microbiome (Taxa) at 5-6m
infant_taxa_56	1	Streptococcus.mutans	5-6 months	-0.0477818	0.115071	Higher in Case	0.00549829	Infant Fecal Microbiome (Taxa) at 5-6m
infant_taxa_56	1	Streptococcus.parasanguinis	5-6 months	-0.0477818	0.115071	Higher in Case	0.00549829	Infant Fecal Microbiome (Taxa) at 5-6m
infant_taxa_56	1	Streptococcus.parasanguinis_B	5-6 months	-0.0477818	0.115071	Higher in Case	0.00549829	Infant Fecal Microbiome (Taxa) at 5-6m
infant_taxa_56	1	Streptococcus.rubneri	5-6 months	-0.0477818	0.115071	Higher in Case	0.00549829	Infant Fecal Microbiome (Taxa) at 5-6m
infant_taxa_56	1	Streptococcus.sp001556435	5-6 months	-0.0477818	0.115071	Higher in Case	0.00549829	Infant Fecal Microbiome (Taxa) at 5-6m
infant_taxa_56	1	Streptococcus.sp002300045	5-6 months	-0.0477818	0.115071	Higher in Case	0.00549829	Infant Fecal Microbiome (Taxa) at 5-6m
infant_taxa_56	1	Streptococcus.sp004166885	5-6 months	-0.0477818	0.115071	Higher in Case	0.00549829	Infant Fecal Microbiome (Taxa) at 5-6m
infant_taxa_56	1	Streptococcus.thermophilus	5-6 months	-0.0477818	0.115071	Higher in Case	0.00549829	Infant Fecal Microbiome (Taxa) at 5-6m
infant_taxa_56	1	Streptococcus.vestibularis	5-6 months	-0.0477818	0.115071	Higher in Case	0.00549829	Infant Fecal Microbiome (Taxa) at 5-6m
infant_taxa_56	1	Unknown_Streptococcus	5-6 months	-0.0477818	0.115071	Higher in Case	0.00549829	Infant Fecal Microbiome (Taxa) at 5-6m
infant_taxa_56	1	Unknown_Streptococcus.2	5-6 months	-0.0477818	0.115071	Higher in Case	0.00549829	Infant Fecal Microbiome (Taxa) at 5-6m
infant_taxa_56	1	Unknown_Streptococcus.3	5-6 months	-0.0477818	0.115071	Higher in Case	0.00549829	Infant Fecal Microbiome (Taxa) at 5-6m
infant_taxa_56	1	Unknown_Streptococcus.4	5-6 months	-0.0477818	0.115071	Higher in Case	0.00549829	Infant Fecal Microbiome (Taxa) at 5-6m
infant_taxa_56	1	CAG.313.sp003539625	5-6 months	-0.0477818	0.115071	Higher in Case	0.00549829	Infant Fecal Microbiome (Taxa) at 5-6m
infant_taxa_56	1	Unknown_UBA1737	5-6 months	-0.0477818	0.115071	Higher in Case	0.00549829	Infant Fecal Microbiome (Taxa) at 5-6m
infant_taxa_56	1	UMGS75.sp900538885	5-6 months	-0.0477818	0.115071	Higher in Case	0.00549829	Infant Fecal Microbiome (Taxa) at 5-6m
infant_taxa_56	1	Unknown_UMGS75	5-6 months	-0.0477818	0.115071	Higher in Case	0.00549829	Infant Fecal Microbiome (Taxa) at 5-6m
infant_taxa_56	1	Unknown_UMGS75.1	5-6 months	-0.0477818	0.115071	Higher in Case	0.00549829	Infant Fecal Microbiome (Taxa) at 5-6m
infant_taxa_56	1	CAG.698.sp000431235	5-6 months	-0.0477818	0.115071	Higher in Case	0.00549829	Infant Fecal Microbiome (Taxa) at 5-6m
infant_taxa_56	1	Tener.01.sp001940985	5-6 months	-0.0477818	0.115071	Higher in Case	0.00549829	Infant Fecal Microbiome (Taxa) at 5-6m
infant_taxa_56	1	Unknown_CAG.698	5-6 months	-0.0477818	0.115071	Higher in Case	0.00549829	Infant Fecal Microbiome (Taxa) at 5-6m
infant_taxa_56	1	CAG.1000.sp000434555	5-6 months	-0.0477818	0.115071	Higher in Case	0.00549829	Infant Fecal Microbiome (Taxa) at 5-6m
infant_taxa_56	1	CAG.1000.sp000436975	5-6 months	-0.0477818	0.115071	Higher in Case	0.00549829	Infant Fecal Microbiome (Taxa) at 5-6m
infant_taxa_56	1	CAG.1000.sp004560915	5-6 months	-0.0477818	0.115071	Higher in Case	0.00549829	Infant Fecal Microbiome (Taxa) at 5-6m
infant_taxa_56	1	CAG.1000.sp900556025	5-6 months	-0.0477818	0.115071	Higher in Case	0.00549829	Infant Fecal Microbiome (Taxa) at 5-6m
infant_taxa_56	1	Unknown_CAG.1000_1	5-6 months	-0.0477818	0.115071	Higher in Case	0.00549829	Infant Fecal Microbiome (Taxa) at 5-6m
infant_taxa_56	1	Unknown_CAG.1000_1.1	5-6 months	-0.0477818	0.115071	Higher in Case	0.00549829	Infant Fecal Microbiome (Taxa) at 5-6m
infant_taxa_56	1	Unknown_CAG.1000_1.2	5-6 months	-0.0477818	0.115071	Higher in Case	0.00549829	Infant Fecal Microbiome (Taxa) at 5-6m
infant_taxa_56	1	Unknown_CAG.1000_1.3	5-6 months	-0.0477818	0.115071	Higher in Case	0.00549829	Infant Fecal Microbiome (Taxa) at 5-6m
infant_vams_34	1	vam_1023809	3-4 months	-0.268961	-0.165494	Lower in Case	0.0445115	Infant VAMS at 3-4m	681.646	367	positive
infant_vams_34	1	vam_2005727	3-4 months	0.270489	0.129927	Higher in Case	0.0351438	Infant VAMS at 3-4m	269.213	413	negative
infant_vams_34	1	vam_1012585	3-4 months	-0.202744	-0.164746	Lower in Case	0.0334014	Infant VAMS at 3-4m	451.237	327	positive	E1336	C11131	2-Methoxy-estradiol-17beta 3-glucuronide
infant_vams_34	1	vam_2003606	3-4 months	-0.156078	-0.176669	Lower in Case	0.0275742	Infant VAMS at 3-4m	205.028	131	negative
infant_vams_34	1	vam_1025616	3-4 months	-0.298955	-0.0800967	Lower in Case	0.0239454	Infant VAMS at 3-4m	707.27	0.35	positive
infant_vams_34	1	vam_2021687	3-4 months	-0.13139	-0.17642	Lower in Case	0.0231799	Infant VAMS at 3-4m	624.96	629	negative
infant_vams_34	1	vam_2030129	3-4 months	-0.16562	-0.138886	Lower in Case	0.0230023	Infant VAMS at 3-4m	789.623	644	negative
infant_vams_34	1	vam_2022104	3-4 months	-0.193803	-0.0981092	Lower in Case	0.0190138	Infant VAMS at 3-4m	633.465	404	negative
infant_vams_34	1	vam_2002669	3-4 months	-0.150581	-0.11284	Lower in Case	0.0169915	Infant VAMS at 3-4m	181.182	388	negative
infant_vams_34	1	vam_1000824	3-4 months	0.0645979	0.235251	Higher in Case	0.0151967	Infant VAMS at 3-4m	138.055	54	positive	E613;E1474	C01250;C00108	N-Acetyl-L-glutamate 5-semialdehyde; 2-Acetamido-5-oxopentanoate;Anthranilate
infant_vams_34	1	vam_2004320	3-4 months	0.0695433	0.202603	Higher in Case	0.0140897	Infant VAMS at 3-4m	229.068	206	negative
infant_vams_34	1	vam_1038192	3-4 months	0.155608	-0.0877321	Lower in Case	0.0136518	Infant VAMS at 3-4m	935.64	392	positive
infant_vams_34	1	vam_2011389	3-4 months	-0.165447	-0.0811075	Lower in Case	0.013419	Infant VAMS at 3-4m	401.096	0.2	negative
infant_vams_34	1	vam_1014490	3-4 months	-0.159545	-0.0825731	Lower in Case	0.0131741	Infant VAMS at 3-4m	491.174	0.34	positive
infant_vams_34	1	vam_1003913	3-4 months	0.0884556	0.136251	Higher in Case	0.0120522	Infant VAMS at 3-4m	238.145	352	positive
infant_vams_34	1	vam_1012394	3-4 months	0.103149	-0.109274	Lower in Case	0.0112716	Infant VAMS at 3-4m	446.247	321	positive
infant_vams_34	1	vam_2003887	3-4 months	0.10871	-0.103086	Lower in Case	0.0112064	Infant VAMS at 3-4m	215.067	148	negative
infant_vams_34	1	vam_2032253	3-4 months	-0.33723	0.0315552	Higher in Case	0.0106414	Infant VAMS at 3-4m	824.642	619	negative
infant_vams_34	1	vam_1030341	3-4 months	-0.130163	-0.0788276	Lower in Case	0.0102604	Infant VAMS at 3-4m	797.299	519	positive
infant_vams_34	1	vam_2016530	3-4 months	-0.0782912	-0.130708	Lower in Case	0.0102333	Infant VAMS at 3-4m	515.287	429	negative
infant_vams_34	1	vam_2010031	3-4 months	0.150858	0.0664873	Higher in Case	0.0100302	Infant VAMS at 3-4m	361.258	456	negative
infant_vams_34	1	vam_1017082	3-4 months	0.375428	-0.026543	Lower in Case	0.00996501	Infant VAMS at 3-4m	540.588	523	positive
infant_vams_34	1	vam_1000362	3-4 months	0.06381	0.149186	Higher in Case	0.00951954	Infant VAMS at 3-4m	115.087	44	positive	E2216	C00077;C00515;C01602	Ornithine$D-Ornithine$Ornithine; 2,5-Diaminovaleric acid; 2,5-Diaminopentanoic acid; 2,5-Diaminopentanoate
infant_vams_34	1	vam_2009829	3-4 months	-0.0637145	-0.117734	Lower in Case	0.00750139	Infant VAMS at 3-4m	356.046	381	negative
infant_vams_34	1	vam_1027738	3-4 months	-0.117106	-0.0606878	Lower in Case	0.00710688	Infant VAMS at 3-4m	744.687	494	positive
infant_vams_34	1	vam_2043294	3-4 months	0.156095	-0.0374322	Lower in Case	0.00584299	Infant VAMS at 3-4m	1249.59	402	negative
infant_vams_34	1	vam_2013547	3-4 months	0.0590621	-0.082753	Lower in Case	0.00488757	Infant VAMS at 3-4m	449.174	406	negative
infant_vams_34	1	vam_2043506	3-4 months	0.0379406	0.127112	Higher in Case	0.00482269	Infant VAMS at 3-4m	1280.14	433	negative
infant_vams_34	1	vam_1020995	3-4 months	0.104301	-0.0429068	Lower in Case	0.00447521	Infant VAMS at 3-4m	635.159	642	positive
infant_vams_34	1	vam_1015626	3-4 months	0.0696096	-0.0552419	Lower in Case	0.00384537	Infant VAMS at 3-4m	512.579	0.51	positive
infant_vams_34	1	vam_1019448	3-4 months	0.0892214	0.0428074	Higher in Case	0.00381934	Infant VAMS at 3-4m	603.879	575	positive
infant_vams_34	1	vam_1030009	3-4 months	-0.063202	-0.0592966	Lower in Case	0.00374766	Infant VAMS at 3-4m	792.345	521	positive
infant_vams_34	1	vam_2001415	3-4 months	-0.114482	-0.031249	Lower in Case	0.00357745	Infant VAMS at 3-4m	143.992	638	negative
infant_vams_34	1	vam_1044514	3-4 months	0.0428425	0.0681009	Higher in Case	0.00291761	Infant VAMS at 3-4m	1376.39	0.55	positive
infant_vams_34	1	vam_2002332	3-4 months	0.0445199	0.0641487	Higher in Case	0.00285589	Infant VAMS at 3-4m	173.009	158	negative	E384;E1188	C00425;C00417;C00158;C04575;C00311	Dehydroascorbate$cis-Aconitate; cis-Aconitic acid;Citrate$$Isocitrate
infant_vams_34	1	vam_1002465	3-4 months	-0.0331006	-0.0857842	Lower in Case	0.00283951	Infant VAMS at 3-4m	191.156	323	positive
infant_vams_34	1	vam_1023355	3-4 months	-0.126252	0.0223623	Higher in Case	0.00282328	Infant VAMS at 3-4m	674.289	521	positive
infant_vams_34	1	vam_1038681	3-4 months	0.118723	-0.0205901	Lower in Case	0.00244451	Infant VAMS at 3-4m	947.239	583	positive	E158	CE4801	3(S)-hydroxy-4(R),8-dimethyl-nonanoyl-CoA
infant_vams_34	1	vam_2034328	3-4 months	0.0256016	-0.0710254	Lower in Case	0.00181836	Infant VAMS at 3-4m	853.399	406	negative
infant_vams_34	1	vam_1001326	3-4 months	-0.0113016	-0.146676	Lower in Case	0.00165768	Infant VAMS at 3-4m	157.122	0.49	positive	E489	CE2006;CE6506	$
infant_vams_34	1	vam_2003401	3-4 months	0.0222701	-0.0454097	Lower in Case	0.00101128	Infant VAMS at 3-4m	199.073	148	negative	E1169	C03740	5-L-Glutamyl-L-alanine
infant_vams_34	1	vam_2031365	3-4 months	-0.00443322	0.151725	Higher in Case	0.00067263	Infant VAMS at 3-4m	812.591	17	negative
infant_vams_34	1	vam_2001399	3-4 months	0.00845582	-0.0791513	Lower in Case	0.000669289	Infant VAMS at 3-4m	143.035	169	negative
infant_vams_34	1	vam_2022347	3-4 months	0.014305	-0.0379433	Lower in Case	0.00054278	Infant VAMS at 3-4m	638.429	402	negative
infant_vams_34	1	vam_2018466	3-4 months	0.0314223	0.0149077	Higher in Case	0.000468433	Infant VAMS at 3-4m	557.294	0.45	negative
infant_vams_34	1	vam_1023605	3-4 months	-0.0253152	-0.0175328	Lower in Case	0.000443847	Infant VAMS at 3-4m	678.508	0.46	positive
infant_vams_34	1	vam_1038464	3-4 months	0.205782	-0.00117049	Lower in Case	0.000240866	Infant VAMS at 3-4m	941.271	744	positive
infant_vams_34	1	vam_2002257	3-4 months	-0.00974637	-0.0129061	Lower in Case	0.000125788	Infant VAMS at 3-4m	170.833	233	negative
infant_vams_34	1	vam_1006681	3-4 months	-0.00783686	-0.0137849	Lower in Case	0.00010803	Infant VAMS at 3-4m	315.133	338	positive
infant_vams_34	1	vam_2001519	3-4 months	-0.0729204	0.000546105	Higher in Case	3.98222e-05	Infant VAMS at 3-4m	149.043	621	negative
maternal_gene_56	1	K06921	5-6 months	0.575724	0.20633	Higher in Case	0.118789	Maternal Fecal Metagenome (Genes) at 5-6m
maternal_gene_56	1	K06142	5-6 months	0.546893	0.201067	Higher in Case	0.109962	Maternal Fecal Metagenome (Genes) at 5-6m
maternal_gene_56	1	K07133	5-6 months	0.332443	0.164826	Higher in Case	0.0547952	Maternal Fecal Metagenome (Genes) at 5-6m
maternal_gene_56	1	K02014	5-6 months	0.224355	0.206785	Higher in Case	0.0463934	Maternal Fecal Metagenome (Genes) at 5-6m
maternal_gene_56	1	GH23_0	5-6 months	0.191048	0.129238	Higher in Case	0.0246907	Maternal Fecal Metagenome (Genes) at 5-6m
maternal_gene_56	1	K00602	5-6 months	0.177557	0.105629	Higher in Case	0.0187552	Maternal Fecal Metagenome (Genes) at 5-6m
maternal_gene_56	1	K23744	5-6 months	0.0970497	0.127222	Higher in Case	0.0123468	Maternal Fecal Metagenome (Genes) at 5-6m
maternal_gene_56	1	K24555	5-6 months	0.0922368	0.132038	Higher in Case	0.0121787	Maternal Fecal Metagenome (Genes) at 5-6m
maternal_gene_56	1	GH28_0	5-6 months	0.118496	0.102638	Higher in Case	0.0121622	Maternal Fecal Metagenome (Genes) at 5-6m
maternal_gene_56	1	K15416	5-6 months	0.105555	0.110885	Higher in Case	0.0117044	Maternal Fecal Metagenome (Genes) at 5-6m
maternal_gene_56	1	K14245	5-6 months	0.0899847	0.1252	Higher in Case	0.0112661	Maternal Fecal Metagenome (Genes) at 5-6m
maternal_gene_56	1	K24528	5-6 months	0.0842689	0.133273	Higher in Case	0.0112307	Maternal Fecal Metagenome (Genes) at 5-6m
maternal_gene_56	1	K16003	5-6 months	0.0881862	0.124034	Higher in Case	0.0109381	Maternal Fecal Metagenome (Genes) at 5-6m
maternal_gene_56	1	K16000	5-6 months	0.0757547	0.128903	Higher in Case	0.00976498	Maternal Fecal Metagenome (Genes) at 5-6m
maternal_gene_56	1	K21381	5-6 months	0.0855988	0.107744	Higher in Case	0.00922273	Maternal Fecal Metagenome (Genes) at 5-6m
maternal_gene_56	1	K23749	5-6 months	0.073445	0.11681	Higher in Case	0.00857907	Maternal Fecal Metagenome (Genes) at 5-6m
maternal_gene_56	1	K16412	5-6 months	0.071575	0.114241	Higher in Case	0.00817677	Maternal Fecal Metagenome (Genes) at 5-6m
maternal_gene_56	1	K16407	5-6 months	0.0649186	0.118098	Higher in Case	0.00766674	Maternal Fecal Metagenome (Genes) at 5-6m
maternal_gene_56	1	K16030	5-6 months	0.0614471	0.122316	Higher in Case	0.00751598	Maternal Fecal Metagenome (Genes) at 5-6m
maternal_gene_56	1	K16411	5-6 months	0.0632755	0.117702	Higher in Case	0.00744765	Maternal Fecal Metagenome (Genes) at 5-6m
maternal_gene_56	1	K16406	5-6 months	0.0756595	0.0968562	Higher in Case	0.00732809	Maternal Fecal Metagenome (Genes) at 5-6m
maternal_gene_56	1	K23746	5-6 months	0.0559401	0.118293	Higher in Case	0.00661733	Maternal Fecal Metagenome (Genes) at 5-6m
maternal_gene_56	1	K24567	5-6 months	0.0542109	0.120745	Higher in Case	0.0065457	Maternal Fecal Metagenome (Genes) at 5-6m
maternal_gene_56	1	K23365	5-6 months	0.0551397	0.117255	Higher in Case	0.00646539	Maternal Fecal Metagenome (Genes) at 5-6m
maternal_gene_56	1	K16413	5-6 months	0.0502913	0.127725	Higher in Case	0.00642344	Maternal Fecal Metagenome (Genes) at 5-6m
maternal_gene_56	1	K21221	5-6 months	0.0583452	0.107986	Higher in Case	0.00630047	Maternal Fecal Metagenome (Genes) at 5-6m
maternal_gene_56	1	K24559	5-6 months	0.0483363	0.126808	Higher in Case	0.00612944	Maternal Fecal Metagenome (Genes) at 5-6m
maternal_gene_56	1	K24568	5-6 months	0.0508664	0.114208	Higher in Case	0.00580936	Maternal Fecal Metagenome (Genes) at 5-6m
maternal_gene_56	1	K24562	5-6 months	0.0492976	0.105663	Higher in Case	0.00520891	Maternal Fecal Metagenome (Genes) at 5-6m
maternal_gene_56	1	K16408	5-6 months	0.0438388	0.0972072	Higher in Case	0.00426145	Maternal Fecal Metagenome (Genes) at 5-6m
maternal_gene_56	1	K24560	5-6 months	0.0389899	0.105316	Higher in Case	0.00410626	Maternal Fecal Metagenome (Genes) at 5-6m
maternal_gene_56	1	K24569	5-6 months	0.0299717	0.113338	Higher in Case	0.00339694	Maternal Fecal Metagenome (Genes) at 5-6m
maternal_gene_56	1	K16398	5-6 months	0.0216153	0.0997856	Higher in Case	0.00215689	Maternal Fecal Metagenome (Genes) at 5-6m
maternal_gene_56	1	K14371	5-6 months	0.0186998	0.107897	Higher in Case	0.00201765	Maternal Fecal Metagenome (Genes) at 5-6m
maternal_gene_56	1	K13560	5-6 months	0.0334768	0.0572255	Higher in Case	0.00191573	Maternal Fecal Metagenome (Genes) at 5-6m
maternal_gene_56	1	K16032	5-6 months	0.0169638	0.101664	Higher in Case	0.0017246	Maternal Fecal Metagenome (Genes) at 5-6m
maternal_gene_56	1	K23367	5-6 months	0.0134607	0.114657	Higher in Case	0.00154336	Maternal Fecal Metagenome (Genes) at 5-6m
maternal_gene_56	1	K07273	5-6 months	0.0156968	0.0980792	Higher in Case	0.00153953	Maternal Fecal Metagenome (Genes) at 5-6m
maternal_gene_56	1	K16001	5-6 months	0.0152043	0.0977277	Higher in Case	0.00148588	Maternal Fecal Metagenome (Genes) at 5-6m
maternal_gene_56	1	K02564	5-6 months	0.0171139	0.0788744	Higher in Case	0.00134985	Maternal Fecal Metagenome (Genes) at 5-6m
maternal_gene_56	1	K14155	5-6 months	0.0216892	0.0611859	Higher in Case	0.00132707	Maternal Fecal Metagenome (Genes) at 5-6m
maternal_gene_56	1	K19108	5-6 months	0.0276757	0.0472654	Higher in Case	0.00130811	Maternal Fecal Metagenome (Genes) at 5-6m
maternal_gene_56	1	GH77_0	5-6 months	0.0244596	0.0501739	Higher in Case	0.00122723	Maternal Fecal Metagenome (Genes) at 5-6m
maternal_gene_56	1	K16031	5-6 months	0.0116368	0.1017	Higher in Case	0.00118346	Maternal Fecal Metagenome (Genes) at 5-6m
maternal_gene_56	1	K16396	5-6 months	0.0126227	0.0856592	Higher in Case	0.00108125	Maternal Fecal Metagenome (Genes) at 5-6m
maternal_gene_56	1	K01270	5-6 months	0.014225	0.0668255	Higher in Case	0.000950595	Maternal Fecal Metagenome (Genes) at 5-6m
maternal_gene_56	1	K23190	5-6 months	0.00363767	0.158994	Higher in Case	0.000578369	Maternal Fecal Metagenome (Genes) at 5-6m
maternal_gene_56	1	K00764	5-6 months	0.0300097	0.017123	Higher in Case	0.000513854	Maternal Fecal Metagenome (Genes) at 5-6m
maternal_gene_56	1	GH25_0	5-6 months	0.00461105	0.0956321	Higher in Case	0.000440964	Maternal Fecal Metagenome (Genes) at 5-6m
maternal_gene_56	1	K16002	5-6 months	0.00195114	0.10446	Higher in Case	0.000203817	Maternal Fecal Metagenome (Genes) at 5-6m
maternal_prot_dep_56	1	A0A0B4J1U7	5-6 months	-0.336924	-0.236702	Lower in Case	0.0797504	Plasma Proteome (Depleted) at 5-6m
maternal_prot_dep_56	1	Q99487	5-6 months	-0.31774	-0.155431	Lower in Case	0.0493865	Plasma Proteome (Depleted) at 5-6m
maternal_prot_dep_56	1	Q7Z2W4	5-6 months	-0.312939	-0.146994	Lower in Case	0.0460003	Plasma Proteome (Depleted) at 5-6m
maternal_prot_dep_56	1	P23975	5-6 months	-0.357414	-0.120182	Lower in Case	0.0429548	Plasma Proteome (Depleted) at 5-6m
maternal_prot_dep_56	1	P33316	5-6 months	-0.168532	-0.229677	Lower in Case	0.038708	Plasma Proteome (Depleted) at 5-6m
maternal_prot_dep_56	1	P83105	5-6 months	-0.380887	-0.092554	Lower in Case	0.0352526	Plasma Proteome (Depleted) at 5-6m
maternal_prot_dep_56	1	Q8NHQ9	5-6 months	-0.338001	-0.0935347	Lower in Case	0.0316148	Plasma Proteome (Depleted) at 5-6m
maternal_prot_dep_56	1	P24557	5-6 months	-0.366962	-0.0799247	Lower in Case	0.0293293	Plasma Proteome (Depleted) at 5-6m
maternal_prot_dep_56	1	P01619	5-6 months	-0.120291	-0.216021	Lower in Case	0.0259854	Plasma Proteome (Depleted) at 5-6m
maternal_prot_dep_56	1	Q96BQ1	5-6 months	-0.128595	-0.138046	Lower in Case	0.017752	Plasma Proteome (Depleted) at 5-6m
maternal_prot_dep_56	1	P08519	5-6 months	0.155947	0.0689494	Higher in Case	0.0107525	Plasma Proteome (Depleted) at 5-6m
maternal_prot_dep_56	1	P01780	5-6 months	-0.0339714	-0.225317	Lower in Case	0.00765436	Plasma Proteome (Depleted) at 5-6m
maternal_prot_dep_56	1	Q9UGM5	5-6 months	0.210954	-0.0358029	Lower in Case	0.00755278	Plasma Proteome (Depleted) at 5-6m
maternal_prot_dep_56	1	Q01459	5-6 months	0.0584159	0.113546	Higher in Case	0.00663287	Plasma Proteome (Depleted) at 5-6m
maternal_prot_dep_56	1	A0A0C4DH35	5-6 months	-0.0340635	-0.16922	Lower in Case	0.00576421	Plasma Proteome (Depleted) at 5-6m
maternal_prot_dep_56	1	P20742	5-6 months	0.0306142	0.175707	Higher in Case	0.00537914	Plasma Proteome (Depleted) at 5-6m
maternal_prot_dep_56	1	Q06033	5-6 months	0.0387879	-0.109568	Lower in Case	0.0042499	Plasma Proteome (Depleted) at 5-6m
maternal_prot_dep_56	1	P00709	5-6 months	-0.118808	-0.0307546	Lower in Case	0.0036539	Plasma Proteome (Depleted) at 5-6m
maternal_prot_dep_56	1	P35443	5-6 months	0.0973169	-0.0362771	Lower in Case	0.00353038	Plasma Proteome (Depleted) at 5-6m
maternal_prot_dep_56	1	P62495	5-6 months	-0.0416883	-0.075136	Lower in Case	0.00313229	Plasma Proteome (Depleted) at 5-6m
maternal_prot_dep_56	1	P05062	5-6 months	-0.0243638	0.03545	Higher in Case	0.000863696	Plasma Proteome (Depleted) at 5-6m
maternal_prot_dep_56	1	Q9BYI3	5-6 months	-0.030339	-0.026846	Lower in Case	0.000814479	Plasma Proteome (Depleted) at 5-6m
maternal_prot_dep_56	1	P22891	5-6 months	0.050649	0.0107932	Higher in Case	0.000546664	Plasma Proteome (Depleted) at 5-6m
maternal_prot_dep_56	1	P43490	5-6 months	-0.00775492	-0.0587228	Lower in Case	0.000455391	Plasma Proteome (Depleted) at 5-6m
maternal_prot_dep_56	1	Q12860	5-6 months	0.00213309	0.0956544	Higher in Case	0.00020404	Plasma Proteome (Depleted) at 5-6m
maternal_prot_nav_56	1	Q16610	5-6 months	0.380511	0.203379	Higher in Case	0.0773879	Plasma Proteome (Naive) at 5-6m
maternal_prot_nav_56	1	P01706	5-6 months	0.486196	0.128515	Higher in Case	0.0624837	Plasma Proteome (Naive) at 5-6m
maternal_prot_nav_56	1	Q4KWH8	5-6 months	0.379537	-0.10493	Lower in Case	0.0398247	Plasma Proteome (Naive) at 5-6m
maternal_prot_nav_56	1	Q9P2S6	5-6 months	0.174099	0.185873	Higher in Case	0.0323604	Plasma Proteome (Naive) at 5-6m
maternal_prot_nav_56	1	A0A0C4DH38	5-6 months	0.125783	0.236407	Higher in Case	0.029736	Plasma Proteome (Naive) at 5-6m
maternal_prot_nav_56	1	O60312	5-6 months	-0.139563	-0.133054	Lower in Case	0.0185694	Plasma Proteome (Naive) at 5-6m
maternal_prot_nav_56	1	P16070	5-6 months	0.255942	0.0666548	Higher in Case	0.0170597	Plasma Proteome (Naive) at 5-6m
maternal_prot_nav_56	1	O95267	5-6 months	0.41359	-0.040315	Lower in Case	0.0166739	Plasma Proteome (Naive) at 5-6m
maternal_prot_nav_56	1	Q9H267	5-6 months	0.17806	0.0849266	Higher in Case	0.015122	Plasma Proteome (Naive) at 5-6m
maternal_prot_nav_56	1	P01709	5-6 months	0.153622	0.0792102	Higher in Case	0.0121685	Plasma Proteome (Naive) at 5-6m
maternal_prot_nav_56	1	P36980	5-6 months	0.0545498	0.190239	Higher in Case	0.0103775	Plasma Proteome (Naive) at 5-6m
maternal_prot_nav_56	1	A0M8Q6	5-6 months	-0.232805	-0.0380146	Lower in Case	0.00884999	Plasma Proteome (Naive) at 5-6m
maternal_prot_nav_56	1	P04278	5-6 months	0.0346793	0.204291	Higher in Case	0.00708467	Plasma Proteome (Naive) at 5-6m
maternal_prot_nav_56	1	P0DOX2	5-6 months	0.0330798	0.187955	Higher in Case	0.00621753	Plasma Proteome (Naive) at 5-6m
maternal_prot_nav_56	1	Q8TF30	5-6 months	0.10088	0.0592948	Higher in Case	0.00598167	Plasma Proteome (Naive) at 5-6m
maternal_prot_nav_56	1	Q06033	5-6 months	0.114254	0.042803	Higher in Case	0.00489041	Plasma Proteome (Naive) at 5-6m
maternal_prot_nav_56	1	P23229	5-6 months	0.15154	-0.0283885	Lower in Case	0.00430198	Plasma Proteome (Naive) at 5-6m
maternal_prot_nav_56	1	Q6PEZ8	5-6 months	0.0202631	0.146984	Higher in Case	0.00297835	Plasma Proteome (Naive) at 5-6m
maternal_prot_nav_56	1	O14791	5-6 months	-0.100702	-0.0208313	Lower in Case	0.00209774	Plasma Proteome (Naive) at 5-6m
maternal_prot_nav_56	1	P20742	5-6 months	0.00917727	0.190013	Higher in Case	0.00174381	Plasma Proteome (Naive) at 5-6m
maternal_prot_nav_56	1	Q08380	5-6 months	0.0107728	0.130257	Higher in Case	0.00140324	Plasma Proteome (Naive) at 5-6m
maternal_prot_nav_56	1	P25311	5-6 months	0.0256065	0.0482787	Higher in Case	0.00123625	Plasma Proteome (Naive) at 5-6m
maternal_prot_nav_56	1	Q86XQ3	5-6 months	-0.0100618	0.0714178	Higher in Case	0.000718591	Plasma Proteome (Naive) at 5-6m
maternal_prot_nav_56	1	P01619	5-6 months	-0.00844612	0.0603546	Higher in Case	0.000509762	Plasma Proteome (Naive) at 5-6m
maternal_prot_nav_56	1	Q9Y2G9	5-6 months	0.00725668	0.0120231	Higher in Case	8.72477e-05	Plasma Proteome (Naive) at 5-6m
maternal_taxa_56	1	Prevotella.sp900553155	5-6 months	0.515219	0.330608	Higher in Case	0.170336	Maternal Fecal Microbiome (Taxa) at 5-6m
maternal_taxa_56	1	Unknown_Prevotella.6	5-6 months	0.334585	0.300291	Higher in Case	0.100473	Maternal Fecal Microbiome (Taxa) at 5-6m
maternal_taxa_56	1	Anaerovibrio.sp900548165	5-6 months	0.29112	0.189889	Higher in Case	0.0552805	Maternal Fecal Microbiome (Taxa) at 5-6m
maternal_taxa_56	1	Prevotella.sp900548745	5-6 months	0.246614	0.212622	Higher in Case	0.0524357	Maternal Fecal Microbiome (Taxa) at 5-6m
maternal_taxa_56	1	Treponema_D.succinifaciens	5-6 months	0.24289	0.139493	Higher in Case	0.0338813	Maternal Fecal Microbiome (Taxa) at 5-6m
maternal_taxa_56	1	Dialister.sp900543165	5-6 months	0.198972	0.15439	Higher in Case	0.0307193	Maternal Fecal Microbiome (Taxa) at 5-6m
maternal_taxa_56	1	Prevotella.sp900556795	5-6 months	0.167363	0.176553	Higher in Case	0.0295484	Maternal Fecal Microbiome (Taxa) at 5-6m
maternal_taxa_56	1	Prevotella.sp900546535	5-6 months	0.301166	0.0645603	Higher in Case	0.0194433	Maternal Fecal Microbiome (Taxa) at 5-6m
maternal_taxa_56	1	CAG.302.sp900543825	5-6 months	-0.118821	-0.152869	Lower in Case	0.018164	Maternal Fecal Microbiome (Taxa) at 5-6m
maternal_taxa_56	1	Prevotella.sp002251385	5-6 months	0.161287	0.109483	Higher in Case	0.0176582	Maternal Fecal Microbiome (Taxa) at 5-6m
maternal_taxa_56	1	Unknown_UMGS1603	5-6 months	-0.112485	-0.101558	Lower in Case	0.0114237	Maternal Fecal Microbiome (Taxa) at 5-6m
maternal_taxa_56	1	Dialister.sp900543455	5-6 months	0.0841223	0.133319	Higher in Case	0.0112151	Maternal Fecal Microbiome (Taxa) at 5-6m
maternal_taxa_56	1	Unknown_Prevotella.4	5-6 months	0.356747	0.0184119	Higher in Case	0.00656839	Maternal Fecal Microbiome (Taxa) at 5-6m
maternal_taxa_56	1	CAG.170.sp003516765	5-6 months	0.162088	0.0350434	Higher in Case	0.00568013	Maternal Fecal Microbiome (Taxa) at 5-6m
maternal_taxa_56	1	Duodenibacillus.sp900544255	5-6 months	0.0726446	0.0701956	Higher in Case	0.00509933	Maternal Fecal Microbiome (Taxa) at 5-6m
maternal_taxa_56	1	Unknown_Eubacterium_R.2	5-6 months	0.0620412	-0.0747095	Lower in Case	0.00463507	Maternal Fecal Microbiome (Taxa) at 5-6m
maternal_taxa_56	1	Bacteroides.uniformis	5-6 months	-0.0867031	-0.0492552	Lower in Case	0.00427058	Maternal Fecal Microbiome (Taxa) at 5-6m
maternal_taxa_56	1	UBA738.sp003522945	5-6 months	0.098372	0.0416373	Higher in Case	0.00409595	Maternal Fecal Microbiome (Taxa) at 5-6m
maternal_taxa_56	1	Unknown_RC9	5-6 months	0.0353999	0.0799152	Higher in Case	0.00282899	Maternal Fecal Microbiome (Taxa) at 5-6m
maternal_taxa_56	1	Odoribacter.splanchnicus	5-6 months	-0.0218766	-0.105665	Lower in Case	0.00231158	Maternal Fecal Microbiome (Taxa) at 5-6m
maternal_taxa_56	1	CAG.448.sp003150135	5-6 months	0.0248066	0.0839741	Higher in Case	0.00208311	Maternal Fecal Microbiome (Taxa) at 5-6m
maternal_taxa_56	1	Unknown_Bulleidia.2	5-6 months	-0.0137734	-0.105764	Lower in Case	0.00145673	Maternal Fecal Microbiome (Taxa) at 5-6m
maternal_taxa_56	1	Prevotella.sp900543975	5-6 months	0.132065	0.00575684	Higher in Case	0.000760279	Maternal Fecal Microbiome (Taxa) at 5-6m
maternal_taxa_56	1	Faecalibacterium.sp900539885	5-6 months	0.00581562	-0.0706415	Lower in Case	0.000410824	Maternal Fecal Microbiome (Taxa) at 5-6m
maternal_taxa_56	1	Unknown_UBA2883.1	5-6 months	0.00137039	0.0765776	Higher in Case	0.000104941	Maternal Fecal Microbiome (Taxa) at 5-6m
maternal_vams_56	1	vam_1005022	5-6 months	-0.298172	-0.189108	Lower in Case	0.0563869	Maternal VAMS at 5-6m	272.186	0.34	positive
maternal_vams_56	1	vam_1020529	5-6 months	-0.184324	-0.25134	Lower in Case	0.046328	Maternal VAMS at 5-6m	627.058	508	positive
maternal_vams_56	1	vam_1006116	5-6 months	-0.217947	-0.205787	Lower in Case	0.0448508	Maternal VAMS at 5-6m	301.517	485	positive
maternal_vams_56	1	vam_1040948	5-6 months	-0.218027	-0.172738	Lower in Case	0.0376616	Maternal VAMS at 5-6m	1102.7	571	positive
maternal_vams_56	1	vam_1000764	5-6 months	0.13979	0.263538	Higher in Case	0.0368401	Maternal VAMS at 5-6m	135.117	325	positive	E199	C02452;C11409;C02759;C00964	Perillyl alcohol; (-)-Perillyl alcohol; p-Mentha-1,8-dien-7-ol; (-)-Perillylalcohol$(+)-trans-Carveol; (4S,6R)-trans-Carveol$$(-)-trans-Carveol
maternal_vams_56	1	vam_2001494	5-6 months	-0.255004	-0.14099	Lower in Case	0.0359531	Maternal VAMS at 5-6m	148.009	0.61	negative
maternal_vams_56	1	vam_1007847	5-6 months	0.334413	0.0988342	Higher in Case	0.0330515	Maternal VAMS at 5-6m	343.295	333	positive
maternal_vams_56	1	vam_1033445	5-6 months	-0.159026	-0.185594	Lower in Case	0.0295143	Maternal VAMS at 5-6m	846.539	631	positive
maternal_vams_56	1	vam_1010562	5-6 months	-0.297305	-0.0977217	Lower in Case	0.0290532	Maternal VAMS at 5-6m	403.925	463	positive
maternal_vams_56	1	vam_2002039	5-6 months	-0.166908	0.157678	Higher in Case	0.0263178	Maternal VAMS at 5-6m	164.004	621	negative
maternal_vams_56	1	vam_1001834	5-6 months	0.204396	0.128267	Higher in Case	0.0262173	Maternal VAMS at 5-6m	173.08	456	positive
maternal_vams_56	1	vam_1002529	5-6 months	0.171117	0.121236	Higher in Case	0.0207457	Maternal VAMS at 5-6m	193.086	325	positive	E396	C02325	Sinapyl alcohol; Sinapoyl alcohol
maternal_vams_56	1	vam_1022084	5-6 months	0.179503	0.11513	Higher in Case	0.0206662	Maternal VAMS at 5-6m	653.659	521	positive
maternal_vams_56	1	vam_1020546	5-6 months	-0.136952	-0.135018	Lower in Case	0.018491	Maternal VAMS at 5-6m	627.388	463	positive
maternal_vams_56	1	vam_2003717	5-6 months	0.202022	0.0822889	Higher in Case	0.0166242	Maternal VAMS at 5-6m	209.083	388	negative	E326	C02325	Sinapyl alcohol; Sinapoyl alcohol
maternal_vams_56	1	vam_2010229	5-6 months	0.158543	0.0964928	Higher in Case	0.0152982	Maternal VAMS at 5-6m	367.216	404	negative	E1109	C05962;C05956	$Prostaglandin G2; PGG2
maternal_vams_56	1	vam_1026500	5-6 months	-0.278662	-0.0405081	Lower in Case	0.011288	Maternal VAMS at 5-6m	724.597	496	positive
maternal_vams_56	1	vam_1022937	5-6 months	0.0586556	-0.18577	Lower in Case	0.0108964	Maternal VAMS at 5-6m	667.762	513	positive
maternal_vams_56	1	vam_2022103	5-6 months	0.0592954	0.177498	Higher in Case	0.0105248	Maternal VAMS at 5-6m	633.455	402	negative
maternal_vams_56	1	vam_1044308	5-6 months	-0.11993	-0.067586	Lower in Case	0.00810555	Maternal VAMS at 5-6m	1355.86	0.51	positive
maternal_vams_56	1	vam_1002530	5-6 months	0.128266	0.0626831	Higher in Case	0.00804013	Maternal VAMS at 5-6m	193.086	342	positive	E396	C02325	Sinapyl alcohol; Sinapoyl alcohol
maternal_vams_56	1	vam_2003170	5-6 months	0.184885	0.040579	Higher in Case	0.00750244	Maternal VAMS at 5-6m	191.056	148	negative	E633	C02076	sedoheptulose
maternal_vams_56	1	vam_2003266	5-6 months	-0.117733	-0.0621463	Lower in Case	0.00731664	Maternal VAMS at 5-6m	195.008	54	negative	E671	C16637;C00672;C00673	5-Deoxyribose-1-phosphate; 5-Deoxy-alpha-D-ribose-1-phosphate$2-Deoxy-D-ribose 1-phosphate$2-Deoxy-D-ribose 5-phosphate
maternal_vams_56	1	vam_2003952	5-6 months	-0.0451185	-0.127537	Lower in Case	0.00575428	Maternal VAMS at 5-6m	218.012	46	negative
maternal_vams_56	1	vam_2029367	5-6 months	-0.0734019	-0.0677386	Lower in Case	0.00497214	Maternal VAMS at 5-6m	772.291	0.64	negative
maternal_vams_56	1	vam_1043444	5-6 months	-0.0566262	-0.0840809	Lower in Case	0.00476118	Maternal VAMS at 5-6m	1300.81	658	positive
maternal_vams_56	1	vam_2003484	5-6 months	0.0505777	0.0907424	Higher in Case	0.00458955	Maternal VAMS at 5-6m	201.803	158	negative
maternal_vams_56	1	vam_2035057	5-6 months	0.0254574	0.17261	Higher in Case	0.00439421	Maternal VAMS at 5-6m	870.678	644	negative
maternal_vams_56	1	vam_2000917	5-6 months	-0.155721	-0.0276257	Lower in Case	0.00430191	Maternal VAMS at 5-6m	135.006	54	negative
maternal_vams_56	1	vam_1007848	5-6 months	0.0516099	-0.0813445	Lower in Case	0.00419818	Maternal VAMS at 5-6m	343.295	354	positive
maternal_vams_56	1	vam_1021307	5-6 months	-0.0142498	-0.267935	Lower in Case	0.00381803	Maternal VAMS at 5-6m	640.732	0.51	positive
maternal_vams_56	1	vam_1013531	5-6 months	-0.0494188	-0.0707762	Lower in Case	0.00349767	Maternal VAMS at 5-6m	472.289	356	positive
maternal_vams_56	1	vam_2030016	5-6 months	0.135509	0.0247309	Higher in Case	0.00335126	Maternal VAMS at 5-6m	787.293	644	negative
maternal_vams_56	1	vam_1040686	5-6 months	-0.0181815	-0.178233	Lower in Case	0.00324055	Maternal VAMS at 5-6m	1065.66	552	positive
maternal_vams_56	1	vam_2017972	5-6 months	0.0542396	0.054791	Higher in Case	0.00297185	Maternal VAMS at 5-6m	546.348	623	negative
maternal_vams_56	1	vam_2011086	5-6 months	0.015073	0.155198	Higher in Case	0.00233929	Maternal VAMS at 5-6m	392.097	138	negative
maternal_vams_56	1	vam_2031746	5-6 months	-0.0434233	-0.0493368	Lower in Case	0.00214237	Maternal VAMS at 5-6m	817.644	644	negative
maternal_vams_56	1	vam_1025864	5-6 months	-0.02648	-0.0696955	Lower in Case	0.00184554	Maternal VAMS at 5-6m	713.419	492	positive
maternal_vams_56	1	vam_1003259	5-6 months	-0.0183226	-0.0945659	Lower in Case	0.0017327	Maternal VAMS at 5-6m	219.083	54	positive
maternal_vams_56	1	vam_2003460	5-6 months	0.0241684	-0.0623063	Lower in Case	0.00150584	Maternal VAMS at 5-6m	201.006	73	negative
maternal_vams_56	1	vam_2003100	5-6 months	0.0236262	0.0451325	Higher in Case	0.00106631	Maternal VAMS at 5-6m	188.986	0.15	negative
maternal_vams_56	1	vam_2001794	5-6 months	-0.114335	-0.00790927	Lower in Case	0.000904305	Maternal VAMS at 5-6m	155.012	58	negative
maternal_vams_56	1	vam_1037739	5-6 months	-0.00378616	-0.222379	Lower in Case	0.000841961	Maternal VAMS at 5-6m	925.259	633	positive
maternal_vams_56	1	vam_2014656	5-6 months	0.0346537	-0.0224285	Lower in Case	0.000777231	Maternal VAMS at 5-6m	472.315	485	negative
maternal_vams_56	1	vam_2002207	5-6 months	-0.0842426	0.00550553	Higher in Case	0.000463801	Maternal VAMS at 5-6m	169.011	54	negative	E2053	C06607	Diethylthiophosphoric acid; DETP
maternal_vams_56	1	vam_1014003	5-6 months	0.00183331	0.191578	Higher in Case	0.000351221	Maternal VAMS at 5-6m	482.405	365	positive
maternal_vams_56	1	vam_1015752	5-6 months	0.043564	-0.00632147	Lower in Case	0.000275389	Maternal VAMS at 5-6m	514.509	496	positive
maternal_vams_56	1	vam_1016083	5-6 months	0.00533532	-0.0366994	Lower in Case	0.000195803	Maternal VAMS at 5-6m	520.509	452	positive
maternal_vams_56	1	vam_1014973	5-6 months	0.00221239	0.0376465	Higher in Case	8.32886e-05	Maternal VAMS at 5-6m	500.294	367	positive	E1678	C01747	Psychosine; Galactosylsphingosine; O-Galactosylsphingosine
maternal_vams_56	1	vam_2004206	5-6 months	-0.00537706	0.00845586	Higher in Case	4.54677e-05	Maternal VAMS at 5-6m	225.984	133	negative
milk_bioactive_34	1	Calprotectin	3-4 months	0.656398	-0.170117	Lower in Case	0.111664	Milk Bioactive Proteins at 3-4m
milk_bioactive_34	1	FGF-21	3-4 months	0.75435	-0.0180236	Lower in Case	0.0135961	Milk Bioactive Proteins at 3-4m
milk_bioactive_34	1	IgA	3-4 months	0.0099353	-0.0603863	Lower in Case	0.000599956	Milk Bioactive Proteins at 3-4m
milk_hmo_34	1	Sia_nmol/mL	3-4 months	0.0742107	-0.150059	Lower in Case	0.011136	Milk HMOs at 3-4m
milk_hmo_34	1	LSTc_nmol/mL	3-4 months	0.466159	-0.0189398	Lower in Case	0.00882896	Milk HMOs at 3-4m
milk_hmo_34	1	DSLNT_nmol/mL	3-4 months	0.0849328	0.0412757	Higher in Case	0.00350566	Milk HMOs at 3-4m
milk_hmo_34	1	3'SL_nmol/mL	3-4 months	0.875642	-0.00214503	Lower in Case	0.00187828	Milk HMOs at 3-4m
milk_hmo_34	1	SUM_nmol/mL	3-4 months	0.0568073	0.0141181	Higher in Case	0.000802009	Milk HMOs at 3-4m
milk_macro_micro_34	1	TRP	3-4 months	-0.70059	-0.190028	Lower in Case	0.133131	Milk Macro- and Micronutrients at 3-4m
milk_macro_micro_34	1	CARBOHYDRATE	3-4 months	-0.283532	-0.134964	Lower in Case	0.0382666	Milk Macro- and Micronutrients at 3-4m
milk_macro_micro_34	1	B6	3-4 months	-0.192879	-0.147989	Lower in Case	0.0285439	Milk Macro- and Micronutrients at 3-4m
milk_macro_micro_34	1	PL	3-4 months	-0.175676	-0.148279	Lower in Case	0.0260491	Milk Macro- and Micronutrients at 3-4m
milk_macro_micro_34	1	Mg	3-4 months	0.53068	0.0337733	Higher in Case	0.0179228	Milk Macro- and Micronutrients at 3-4m
milk_macro_micro_34	1	Na	3-4 months	0.268245	-0.0364252	Lower in Case	0.00977088	Milk Macro- and Micronutrients at 3-4m
milk_macro_micro_34	1	PLP	3-4 months	-0.055411	-0.0260163	Lower in Case	0.00144159	Milk Macro- and Micronutrients at 3-4m
milk_macro_micro_34	1	Mo	3-4 months	-0.0560845	0.0126108	Higher in Case	0.00070727	Milk Macro- and Micronutrients at 3-4m
milk_macro_micro_34	1	TPP	3-4 months	0.0102307	-0.0571351	Lower in Case	0.000584533	Milk Macro- and Micronutrients at 3-4m
milk_macro_micro_34	1	PROTEIN	3-4 months	0.0286727	0.0172467	Higher in Case	0.000494508	Milk Macro- and Micronutrients at 3-4m
milk_metabolome_34	1	rLC_neg_mtb_1218383	3-4 months	0.417434	0.203174	Higher in Case	0.0848116	Milk Metabolome at 3-4m	1273.4	91	negative
milk_metabolome_34	1	rLC_neg_mtb_7475795	3-4 months	-0.301658	0.132583	Higher in Case	0.0399947	Milk Metabolome at 3-4m	809.505	546	negative
milk_metabolome_34	1	rLC_neg_mtb_3646835	3-4 months	0.309339	0.111655	Higher in Case	0.0345391	Milk Metabolome at 3-4m	488.046	271	negative
milk_metabolome_34	1	rLC_pos_mtb_622433	3-4 months	-0.215538	-0.121517	Lower in Case	0.0261915	Milk Metabolome at 3-4m	462.183	45	positive
milk_metabolome_34	1	rLC_pos_mtb_5718445	3-4 months	-0.195301	0.118596	Higher in Case	0.023162	Milk Metabolome at 3-4m	602.524	0.38	positive
milk_metabolome_34	1	rLC_pos_mtb_4287350	3-4 months	-0.25333	0.0911745	Higher in Case	0.0230972	Milk Metabolome at 3-4m	520.446	293	positive
milk_metabolome_34	1	rLC_neg_mtb_2082576	3-4 months	0.201185	-0.108797	Lower in Case	0.0218882	Milk Metabolome at 3-4m	130.022	176	negative	E586;E853	C16633;C01732;C00490	5-Fluorouridine;Mesaconate; 2-Methylfumarate; Mesaconic acid; Methylfumaric acid$Itaconate; Itaconic acid; Methylenesuccinic acid
milk_metabolome_34	1	rLC_pos_mtb_4742854	3-4 months	-0.105606	0.191432	Higher in Case	0.0202165	Milk Metabolome at 3-4m	582.507	333	positive
milk_metabolome_34	1	rLC_neg_mtb_1696574	3-4 months	0.217262	0.0808509	Higher in Case	0.0175659	Milk Metabolome at 3-4m	174.014	172	negative
milk_metabolome_34	1	rLC_neg_mtb_6387186	3-4 months	-0.128133	0.134837	Higher in Case	0.0172771	Milk Metabolome at 3-4m	564.391	469	negative
milk_metabolome_34	1	rLC_pos_mtb_5685893	3-4 months	-0.181536	0.086143	Higher in Case	0.0156381	Milk Metabolome at 3-4m	619.531	0.38	positive
milk_metabolome_34	1	rLC_neg_mtb_6853261	3-4 months	-0.152115	0.0890661	Higher in Case	0.0135483	Milk Metabolome at 3-4m	782.487	0.5	negative
milk_metabolome_34	1	rLC_neg_mtb_3616577	3-4 months	0.0873355	0.136031	Higher in Case	0.0118804	Milk Metabolome at 3-4m	629.058	271	negative
milk_metabolome_34	1	rLC_neg_mtb_4906629	3-4 months	-0.164851	0.0655609	Higher in Case	0.0108077	Milk Metabolome at 3-4m	225.186	358	negative
milk_metabolome_34	1	rLC_neg_mtb_3342846	3-4 months	0.169521	0.0636046	Higher in Case	0.0107823	Milk Metabolome at 3-4m	345.046	252	negative
milk_metabolome_34	1	rLC_pos_mtb_6267182	3-4 months	-0.0938093	0.109569	Higher in Case	0.0102786	Milk Metabolome at 3-4m	643.528	0.42	positive
milk_metabolome_34	1	rLC_neg_mtb_7475304	3-4 months	-0.2007	0.0508575	Higher in Case	0.0102071	Milk Metabolome at 3-4m	783.488	502	negative
milk_metabolome_34	1	rLC_pos_mtb_3582883	3-4 months	-0.142842	0.0650379	Higher in Case	0.00929015	Milk Metabolome at 3-4m	411.348	242	positive
milk_metabolome_34	1	rLC_neg_mtb_3646244	3-4 months	-0.0980793	0.093951	Higher in Case	0.00921465	Milk Metabolome at 3-4m	459.085	267	negative
milk_metabolome_34	1	rLC_pos_mtb_5650084	3-4 months	-0.150274	0.0559729	Higher in Case	0.00841127	Milk Metabolome at 3-4m	636.557	374	positive
milk_metabolome_34	1	rLC_neg_mtb_6414907	3-4 months	-0.0404585	-0.200047	Lower in Case	0.0080936	Milk Metabolome at 3-4m	339.326	467	negative	E443	C08281	Docosanoic acid; Docosanoate; Behenic acid
milk_metabolome_34	1	rLC_neg_mtb_7725087	3-4 months	-0.0469438	0.144782	Higher in Case	0.00679664	Milk Metabolome at 3-4m	695.527	0.56	negative
milk_metabolome_34	1	rLC_pos_mtb_5686298	3-4 months	-0.0787171	0.0781672	Higher in Case	0.0061531	Milk Metabolome at 3-4m	642.517	374	positive
milk_metabolome_34	1	rLC_neg_mtb_6151939	3-4 months	0.0237365	0.242777	Higher in Case	0.00576268	Milk Metabolome at 3-4m	702.411	457	negative
milk_metabolome_34	1	rLC_pos_mtb_4778575	3-4 months	-0.0213042	0.263993	Higher in Case	0.00562416	Milk Metabolome at 3-4m	548.477	322	positive
milk_metabolome_34	1	rLC_pos_mtb_4349550	3-4 months	-0.108985	0.0494567	Higher in Case	0.00539006	Milk Metabolome at 3-4m	554.479	293	positive
milk_metabolome_34	1	rLC_pos_mtb_1232433	3-4 months	0.0944745	0.0564381	Higher in Case	0.00533197	Milk Metabolome at 3-4m	515.009	95	positive
milk_metabolome_34	1	rLC_pos_mtb_5958455	3-4 months	-0.0241009	0.2129	Higher in Case	0.00513108	Milk Metabolome at 3-4m	591.497	395	positive
milk_metabolome_34	1	rLC_neg_mtb_5018976	3-4 months	-0.0795215	-0.0638546	Lower in Case	0.00507781	Milk Metabolome at 3-4m	510.292	364	negative
milk_metabolome_34	1	rLC_neg_mtb_1865007	3-4 months	-0.0189101	-0.250859	Lower in Case	0.00474377	Milk Metabolome at 3-4m	951.277	143	negative
milk_metabolome_34	1	rLC_neg_mtb_4737569	3-4 months	-0.125275	-0.0344457	Lower in Case	0.00431517	Milk Metabolome at 3-4m	386.221	335	negative
milk_metabolome_34	1	rLC_neg_mtb_5323998	3-4 months	0.0527682	-0.0720894	Lower in Case	0.00380403	Milk Metabolome at 3-4m	173.026	384	negative
milk_metabolome_34	1	rLC_pos_mtb_1410091	3-4 months	0.0199959	0.186565	Higher in Case	0.00373053	Milk Metabolome at 3-4m	536.923	107	positive
milk_metabolome_34	1	rLC_pos_mtb_5111620	3-4 months	-0.0155371	0.219771	Higher in Case	0.00341462	Milk Metabolome at 3-4m	564.469	345	positive
milk_metabolome_34	1	rLC_neg_mtb_6906262	3-4 months	0.164638	-0.0202176	Lower in Case	0.00332858	Milk Metabolome at 3-4m	585.375	504	negative
milk_metabolome_34	1	rLC_neg_mtb_5357745	3-4 months	-0.0275963	0.105396	Higher in Case	0.00290854	Milk Metabolome at 3-4m	743.474	397	negative
milk_metabolome_34	1	rLC_pos_mtb_5143354	3-4 months	-0.015801	0.181007	Higher in Case	0.00286008	Milk Metabolome at 3-4m	524.477	341	positive
milk_metabolome_34	1	rLC_neg_mtb_5411775	3-4 months	0.0311055	0.0864482	Higher in Case	0.00268902	Milk Metabolome at 3-4m	880.615	401	negative
milk_metabolome_34	1	rLC_neg_mtb_3616537	3-4 months	0.0638545	0.0396192	Higher in Case	0.00252987	Milk Metabolome at 3-4m	627.058	271	negative
milk_metabolome_34	1	rLC_pos_mtb_3228786	3-4 months	0.0704729	0.035402	Higher in Case	0.00249488	Milk Metabolome at 3-4m	496.341	223	positive	E196	dcsptn1crn;clpndcrn	docosa-4,7,10,13,16-pentaenoyl carnitine$clupanodonyl carnitine
milk_metabolome_34	1	rLC_neg_mtb_7472403	3-4 months	-0.0298034	0.0785205	Higher in Case	0.00234018	Milk Metabolome at 3-4m	645.467	546	negative
milk_metabolome_34	1	rLC_neg_mtb_3739662	3-4 months	-0.121364	-0.0149407	Lower in Case	0.00181326	Milk Metabolome at 3-4m	427.13	281	negative
milk_metabolome_34	1	rLC_pos_mtb_4640398	3-4 months	-0.0286055	0.0559331	Higher in Case	0.00159999	Milk Metabolome at 3-4m	577.424	314	positive	E384	C05805;C05313	2-Hexaprenyl-3-methyl-5-hydroxy-6-methoxy-1,4-benzoquinone$3-Hexaprenyl-4-hydroxy-5-methoxybenzoate
milk_metabolome_34	1	rLC_neg_mtb_1210550	3-4 months	-0.0115323	-0.100669	Lower in Case	0.00116095	Milk Metabolome at 3-4m	772.25	87	negative
milk_metabolome_34	1	rLC_pos_mtb_6303596	3-4 months	-0.0183289	0.0557196	Higher in Case	0.00102128	Milk Metabolome at 3-4m	603.536	413	positive
milk_metabolome_34	1	rLC_neg_mtb_2595082	3-4 months	0.0221901	0.0336772	Higher in Case	0.0007473	Milk Metabolome at 3-4m	992.994	203	negative
milk_metabolome_34	1	rLC_neg_mtb_2703592	3-4 months	0.018993	0.0293662	Higher in Case	0.000557753	Milk Metabolome at 3-4m	365.031	203	negative
milk_metabolome_34	1	rLC_neg_mtb_7381549	3-4 months	-0.193652	-0.00280285	Lower in Case	0.000542778	Milk Metabolome at 3-4m	739.483	539	negative
milk_metabolome_34	1	rLC_neg_mtb_1348758	3-4 months	0.0456734	-0.00486382	Lower in Case	0.000222147	Milk Metabolome at 3-4m	755.226	101	negative
milk_metabolome_34	1	rLC_neg_mtb_1267378	3-4 months	0.00171529	-0.0251157	Lower in Case	4.30808e-05	Milk Metabolome at 3-4m	754.217	101	negative
milk_targeted_34	1	FA.12.0.	3-4 months	-0.340231	0.113292	Higher in Case	0.0385455	Milk Targeted Metabolites at 3-4m
milk_targeted_34	1	Thr	3-4 months	-0.43223	-0.074956	Lower in Case	0.0323982	Milk Targeted Metabolites at 3-4m
milk_targeted_34	1	DG.14.0_18.1.	3-4 months	-0.300128	0.101532	Higher in Case	0.0304727	Milk Targeted Metabolites at 3-4m
milk_targeted_34	1	AA	3-4 months	-0.173241	0.134652	Higher in Case	0.0233272	Milk Targeted Metabolites at 3-4m
milk_targeted_34	1	DG.16.1_18.0.	3-4 months	-0.226678	-0.0998386	Lower in Case	0.0226313	Milk Targeted Metabolites at 3-4m
milk_targeted_34	1	DG.18.1_18.1.	3-4 months	-0.1363	-0.14354	Lower in Case	0.0195645	Milk Targeted Metabolites at 3-4m
milk_targeted_34	1	Trp	3-4 months	-0.113654	-0.161894	Lower in Case	0.0184	Milk Targeted Metabolites at 3-4m
milk_targeted_34	1	DG.18.1_18.2.	3-4 months	-0.163121	-0.10648	Lower in Case	0.0173691	Milk Targeted Metabolites at 3-4m
milk_targeted_34	1	H1	3-4 months	-0.102007	-0.152338	Lower in Case	0.0155396	Milk Targeted Metabolites at 3-4m
milk_targeted_34	1	FA.20.2.	3-4 months	-0.30538	0.0363047	Higher in Case	0.0110867	Milk Targeted Metabolites at 3-4m
milk_targeted_34	1	DG.16.0_18.1.	3-4 months	-0.185228	-0.0596315	Lower in Case	0.0110454	Milk Targeted Metabolites at 3-4m
milk_targeted_34	1	DG.18.2_18.3.	3-4 months	-0.288109	0.0373532	Higher in Case	0.0107618	Milk Targeted Metabolites at 3-4m
milk_targeted_34	1	DG.14.0_18.2.	3-4 months	-0.0692833	0.147333	Higher in Case	0.0102077	Milk Targeted Metabolites at 3-4m
milk_targeted_34	1	FA.18.1.	3-4 months	-0.318888	0.026088	Higher in Case	0.00831914	Milk Targeted Metabolites at 3-4m
milk_targeted_34	1	Cys	3-4 months	-0.0443858	-0.166485	Lower in Case	0.00738955	Milk Targeted Metabolites at 3-4m
milk_targeted_34	1	FA.18.2.	3-4 months	-0.110262	0.0581246	Higher in Case	0.00640891	Milk Targeted Metabolites at 3-4m
milk_targeted_34	1	DG.18.1_20.2.	3-4 months	-0.0765658	-0.0830729	Lower in Case	0.00636055	Milk Targeted Metabolites at 3-4m
milk_targeted_34	1	DG.18.2_18.2.	3-4 months	-0.105692	-0.0447138	Lower in Case	0.00472589	Milk Targeted Metabolites at 3-4m
milk_targeted_34	1	FA.20.3.	3-4 months	-0.0199977	0.146248	Higher in Case	0.00292462	Milk Targeted Metabolites at 3-4m
milk_targeted_34	1	DG.18.1_20.3.	3-4 months	-0.0587526	0.04293	Higher in Case	0.00252225	Milk Targeted Metabolites at 3-4m
milk_targeted_34	1	DG.16.0_18.2.	3-4 months	-0.144112	0.0156786	Higher in Case	0.00225948	Milk Targeted Metabolites at 3-4m
milk_targeted_34	1	CE.18.3.	3-4 months	-0.134147	-0.0168151	Lower in Case	0.00225569	Milk Targeted Metabolites at 3-4m
milk_targeted_34	1	DG.16.0_20.3.	3-4 months	-0.0185027	0.119064	Higher in Case	0.002203	Milk Targeted Metabolites at 3-4m
milk_targeted_34	1	DG.18.1_18.3.	3-4 months	-0.253233	-0.00404201	Lower in Case	0.00102357	Milk Targeted Metabolites at 3-4m
milk_targeted_34	1	C3	3-4 months	0.0461634	0.0202233	Higher in Case	0.000933577	Milk Targeted Metabolites at 3-4m
milk_taxa_34	1	Bifidobacterium_388775.sp27	3-4 months	-0.245464	-0.294486	Lower in Case	0.0722856	Milk Microbiome at 3-4m
milk_taxa_34	1	Nocardiopsis_A_393323.salina	3-4 months	0.596624	0.0984683	Higher in Case	0.0587486	Milk Microbiome at 3-4m
milk_taxa_34	1	Peribacillus_301373.sp1	3-4 months	0.248608	0.184062	Higher in Case	0.0457593	Milk Microbiome at 3-4m
milk_taxa_34	1	Paracoccus.sp27	3-4 months	-0.404011	-0.100883	Lower in Case	0.0407579	Milk Microbiome at 3-4m
milk_taxa_34	1	Azorhizobium.caulinodans	3-4 months	-0.226603	-0.115775	Lower in Case	0.0262351	Milk Microbiome at 3-4m
milk_taxa_34	1	Geodermatophilus_A.obscurus	3-4 months	-0.129593	0.150462	Higher in Case	0.0194989	Milk Microbiome at 3-4m
milk_taxa_34	1	Achromobacter.sp1	3-4 months	0.187824	0.102445	Higher in Case	0.0192415	Milk Microbiome at 3-4m
milk_taxa_34	1	Citricoccus.sp000224415	3-4 months	-0.194878	-0.0893014	Lower in Case	0.0174029	Milk Microbiome at 3-4m
milk_taxa_34	1	Arthrobacter_D.sp3	3-4 months	-0.132714	-0.110958	Lower in Case	0.0147256	Milk Microbiome at 3-4m
milk_taxa_34	1	Ornithinimicrobium_390105.sp1	3-4 months	-0.153424	-0.0911787	Lower in Case	0.013989	Milk Microbiome at 3-4m
milk_taxa_34	1	Unclassified.Enterobacteriaceae_A.sp19	3-4 months	-0.108974	-0.0909197	Lower in Case	0.0099079	Milk Microbiome at 3-4m
milk_taxa_34	1	Bacillus_A.sp12	3-4 months	-0.23039	0.0402587	Higher in Case	0.00927519	Milk Microbiome at 3-4m
milk_taxa_34	1	Staphylococcus.sp56	3-4 months	0.213103	0.0420273	Higher in Case	0.00895614	Milk Microbiome at 3-4m
milk_taxa_34	1	Corynebacterium.sp58	3-4 months	-0.0690054	-0.101114	Lower in Case	0.00697739	Milk Microbiome at 3-4m
milk_taxa_34	1	Methylobacterium.sp14	3-4 months	-0.0389905	-0.113566	Lower in Case	0.00442798	Milk Microbiome at 3-4m
milk_taxa_34	1	Unclassified.Dermatophilaceae_390796.sp6	3-4 months	-0.149566	-0.0290953	Lower in Case	0.00435165	Milk Microbiome at 3-4m
milk_taxa_34	1	Gordonia_B_376796.sp2	3-4 months	0.0585598	-0.0428095	Lower in Case	0.00250692	Milk Microbiome at 3-4m
milk_taxa_34	1	Planobacterium.taklimakanense	3-4 months	-0.156015	-0.014052	Lower in Case	0.00219233	Milk Microbiome at 3-4m
milk_taxa_34	1	Limosilactobacillus.pontis	3-4 months	-0.0314136	0.0482922	Higher in Case	0.00151703	Milk Microbiome at 3-4m
milk_taxa_34	1	Bifidobacterium_388775.sp6	3-4 months	-0.0250653	-0.0602967	Lower in Case	0.00151135	Milk Microbiome at 3-4m
milk_taxa_34	1	Collinsella.sp4	3-4 months	0.0301275	0.0498629	Higher in Case	0.00150225	Milk Microbiome at 3-4m
milk_taxa_34	1	Anaerococcus.nagyae	3-4 months	-0.0429104	-0.020737	Lower in Case	0.000889831	Milk Microbiome at 3-4m
milk_taxa_34	1	Corynebacterium.riegelii	3-4 months	-0.0684175	0.0124567	Higher in Case	0.000852255	Milk Microbiome at 3-4m
milk_taxa_34	1	Granulicatella.elegans.4	3-4 months	0.0179609	0.0230987	Higher in Case	0.000414873	Milk Microbiome at 3-4m
milk_taxa_34	1	Luteimonas_C_615545.sp1	3-4 months	-0.00699093	0.0239452	Higher in Case	0.000167399	Milk Microbiome at 3-4m
infant_gene_56	2	GH18_0	5-6 months	-0.434316	-0.201026	Lower in Case	0.0873088	Infant Fecal Metagenome (Genes) at 5-6m
infant_gene_56	2	3003835	5-6 months	-0.424207	-0.14659	Lower in Case	0.0621844	Infant Fecal Metagenome (Genes) at 5-6m
infant_gene_56	2	3000833	5-6 months	-0.229264	-0.194516	Lower in Case	0.0445956	Infant Fecal Metagenome (Genes) at 5-6m
infant_gene_56	2	3005008	5-6 months	-0.226915	-0.191028	Lower in Case	0.0433472	Infant Fecal Metagenome (Genes) at 5-6m
infant_gene_56	2	K22854	5-6 months	-0.223757	-0.172786	Lower in Case	0.0386619	Infant Fecal Metagenome (Genes) at 5-6m
infant_gene_56	2	GH31_0	5-6 months	-0.174841	-0.17469	Lower in Case	0.030543	Infant Fecal Metagenome (Genes) at 5-6m
infant_gene_56	2	K10923	5-6 months	-0.183252	-0.164253	Lower in Case	0.0300997	Infant Fecal Metagenome (Genes) at 5-6m
infant_gene_56	2	CBM32_0	5-6 months	-0.13507	-0.196644	Lower in Case	0.0265606	Infant Fecal Metagenome (Genes) at 5-6m
infant_gene_56	2	K14732	5-6 months	-0.149969	-0.171648	Lower in Case	0.025742	Infant Fecal Metagenome (Genes) at 5-6m
infant_gene_56	2	K03088	5-6 months	-0.150501	-0.169301	Lower in Case	0.0254799	Infant Fecal Metagenome (Genes) at 5-6m
infant_gene_56	2	K07780	5-6 months	-0.158406	-0.160645	Lower in Case	0.0254472	Infant Fecal Metagenome (Genes) at 5-6m
infant_gene_56	2	GH105_0	5-6 months	-0.166286	-0.152105	Lower in Case	0.0252929	Infant Fecal Metagenome (Genes) at 5-6m
infant_gene_56	2	3002924	5-6 months	-0.148096	-0.168102	Lower in Case	0.0248952	Infant Fecal Metagenome (Genes) at 5-6m
infant_gene_56	2	3002925	5-6 months	-0.14217	-0.174182	Lower in Case	0.0247634	Infant Fecal Metagenome (Genes) at 5-6m
infant_gene_56	2	K07720	5-6 months	-0.2444	-0.084676	Lower in Case	0.0206948	Infant Fecal Metagenome (Genes) at 5-6m
infant_gene_56	2	K03327	5-6 months	-0.15416	-0.12946	Lower in Case	0.0199576	Infant Fecal Metagenome (Genes) at 5-6m
infant_gene_56	2	K12373	5-6 months	-0.103475	-0.188812	Lower in Case	0.0195374	Infant Fecal Metagenome (Genes) at 5-6m
infant_gene_56	2	K04759	5-6 months	-0.147729	-0.123294	Lower in Case	0.0182142	Infant Fecal Metagenome (Genes) at 5-6m
infant_gene_56	2	K25763	5-6 months	-0.108388	-0.163823	Lower in Case	0.0177564	Infant Fecal Metagenome (Genes) at 5-6m
infant_gene_56	2	K01447	5-6 months	-0.101147	-0.171811	Lower in Case	0.0173781	Infant Fecal Metagenome (Genes) at 5-6m
infant_gene_56	2	K20172	5-6 months	-0.167881	-0.102661	Lower in Case	0.0172348	Infant Fecal Metagenome (Genes) at 5-6m
infant_gene_56	2	K01686	5-6 months	-0.105448	-0.156671	Lower in Case	0.0165207	Infant Fecal Metagenome (Genes) at 5-6m
infant_gene_56	2	GH20_0	5-6 months	-0.0875496	-0.184576	Lower in Case	0.0161595	Infant Fecal Metagenome (Genes) at 5-6m
infant_gene_56	2	K04079	5-6 months	-0.0891516	-0.17088	Lower in Case	0.0152342	Infant Fecal Metagenome (Genes) at 5-6m
infant_gene_56	2	K21675	5-6 months	-0.131971	-0.0938583	Lower in Case	0.0123866	Infant Fecal Metagenome (Genes) at 5-6m
infant_gene_56	2	K01012	5-6 months	-0.0640487	-0.180948	Lower in Case	0.0115895	Infant Fecal Metagenome (Genes) at 5-6m
infant_gene_56	2	K04758	5-6 months	-0.0763345	-0.149554	Lower in Case	0.0114162	Infant Fecal Metagenome (Genes) at 5-6m
infant_gene_56	2	3000829	5-6 months	-0.0863905	-0.128003	Lower in Case	0.0110583	Infant Fecal Metagenome (Genes) at 5-6m
infant_gene_56	2	K03832	5-6 months	-0.0504081	-0.18115	Lower in Case	0.00913142	Infant Fecal Metagenome (Genes) at 5-6m
infant_gene_56	2	K03585	5-6 months	-0.0438357	-0.205948	Lower in Case	0.00902786	Infant Fecal Metagenome (Genes) at 5-6m
infant_gene_56	2	3002939	5-6 months	-0.0773104	-0.100176	Lower in Case	0.00774462	Infant Fecal Metagenome (Genes) at 5-6m
infant_gene_56	2	K18954	5-6 months	-0.0442833	-0.166574	Lower in Case	0.00737644	Infant Fecal Metagenome (Genes) at 5-6m
infant_gene_56	2	K03150	5-6 months	-0.0419759	-0.161307	Lower in Case	0.00677101	Infant Fecal Metagenome (Genes) at 5-6m
infant_gene_56	2	K07095	5-6 months	-0.0458697	-0.123948	Lower in Case	0.00568547	Infant Fecal Metagenome (Genes) at 5-6m
infant_gene_56	2	K03307	5-6 months	-0.033763	-0.158945	Lower in Case	0.00536648	Infant Fecal Metagenome (Genes) at 5-6m
infant_gene_56	2	CE19_0	5-6 months	-0.0440458	-0.119402	Lower in Case	0.00525918	Infant Fecal Metagenome (Genes) at 5-6m
infant_gene_56	2	K03615	5-6 months	-0.0405458	-0.123885	Lower in Case	0.00502299	Infant Fecal Metagenome (Genes) at 5-6m
infant_gene_56	2	K06889	5-6 months	-0.0345008	-0.12998	Lower in Case	0.00448441	Infant Fecal Metagenome (Genes) at 5-6m
infant_gene_56	2	K21593	5-6 months	-0.0343807	-0.126051	Lower in Case	0.00433372	Infant Fecal Metagenome (Genes) at 5-6m
infant_gene_56	2	K01961	5-6 months	-0.0232063	-0.18418	Lower in Case	0.00427415	Infant Fecal Metagenome (Genes) at 5-6m
infant_gene_56	2	GH2_0	5-6 months	-0.0244955	-0.164515	Lower in Case	0.00402989	Infant Fecal Metagenome (Genes) at 5-6m
infant_gene_56	2	K03308	5-6 months	-0.0272432	-0.127609	Lower in Case	0.00347649	Infant Fecal Metagenome (Genes) at 5-6m
infant_gene_56	2	K03525	5-6 months	-0.020835	-0.145883	Lower in Case	0.00303948	Infant Fecal Metagenome (Genes) at 5-6m
infant_gene_56	2	K01338	5-6 months	-0.0175742	-0.167149	Lower in Case	0.00293751	Infant Fecal Metagenome (Genes) at 5-6m
infant_gene_56	2	K01092	5-6 months	-0.0111524	-0.252294	Lower in Case	0.00281368	Infant Fecal Metagenome (Genes) at 5-6m
infant_gene_56	2	K07126	5-6 months	-0.0130905	-0.205272	Lower in Case	0.00268711	Infant Fecal Metagenome (Genes) at 5-6m
infant_gene_56	2	K05394	5-6 months	-0.0208334	-0.12112	Lower in Case	0.00252335	Infant Fecal Metagenome (Genes) at 5-6m
infant_gene_56	2	K10439	5-6 months	-0.0164657	-0.140327	Lower in Case	0.00231058	Infant Fecal Metagenome (Genes) at 5-6m
infant_gene_56	2	K19304	5-6 months	-0.00650547	-0.200031	Lower in Case	0.00130129	Infant Fecal Metagenome (Genes) at 5-6m
infant_gene_56	2	3003841	5-6 months	-0.0106519	-0.11148	Lower in Case	0.00118747	Infant Fecal Metagenome (Genes) at 5-6m
infant_taxa_56	2	Bacteroides.thetaiotaomicron	5-6 months	-0.366763	-0.137499	Lower in Case	0.0504295	Infant Fecal Microbiome (Taxa) at 5-6m
infant_taxa_56	2	Bacteroides.fragilis_A	5-6 months	-0.460314	-0.079368	Lower in Case	0.0365342	Infant Fecal Microbiome (Taxa) at 5-6m
infant_taxa_56	2	Pauljensenia.sp900541895	5-6 months	0.346169	0.101859	Higher in Case	0.0352605	Infant Fecal Microbiome (Taxa) at 5-6m
infant_taxa_56	2	Bacteroides.ovatus	5-6 months	-0.262847	-0.110216	Lower in Case	0.02897	Infant Fecal Microbiome (Taxa) at 5-6m
infant_taxa_56	2	Flavonifractor.plautii	5-6 months	-0.318439	-0.0889994	Lower in Case	0.0283409	Infant Fecal Microbiome (Taxa) at 5-6m
infant_taxa_56	2	Bilophila.wadsworthia	5-6 months	-0.209757	-0.113432	Lower in Case	0.0237933	Infant Fecal Microbiome (Taxa) at 5-6m
infant_taxa_56	2	Clostridium.paraputrificum	5-6 months	-0.320107	-0.0660326	Lower in Case	0.0211375	Infant Fecal Microbiome (Taxa) at 5-6m
infant_taxa_56	2	Enterococcus_B.hirae	5-6 months	0.0852384	0.190383	Higher in Case	0.0162279	Infant Fecal Microbiome (Taxa) at 5-6m
infant_taxa_56	2	Enterococcus_D.gallinarum	5-6 months	0.0669849	0.147694	Higher in Case	0.00989323	Infant Fecal Microbiome (Taxa) at 5-6m
infant_taxa_56	2	Enterococcus_B.faecium	5-6 months	0.0789998	0.122816	Higher in Case	0.00970247	Infant Fecal Microbiome (Taxa) at 5-6m
infant_taxa_56	2	Streptococcus.sp900543065	5-6 months	0.218346	-0.0419567	Lower in Case	0.00916107	Infant Fecal Microbiome (Taxa) at 5-6m
infant_taxa_56	2	Unknown_Rothia	5-6 months	0.159207	-0.0465223	Lower in Case	0.00740666	Infant Fecal Microbiome (Taxa) at 5-6m
infant_taxa_56	2	Streptococcus.sp000187445	5-6 months	0.244073	0.0279922	Higher in Case	0.00683214	Infant Fecal Microbiome (Taxa) at 5-6m
infant_taxa_56	2	Unknown_Lancefieldella.2	5-6 months	0.108257	-0.0602362	Lower in Case	0.00652098	Infant Fecal Microbiome (Taxa) at 5-6m
infant_taxa_56	2	Ruminococcus_B.gnavus	5-6 months	-0.0799823	-0.0759077	Lower in Case	0.00607127	Infant Fecal Microbiome (Taxa) at 5-6m
infant_taxa_56	2	Megasphaera.sp001546855	5-6 months	-0.179106	0.0324371	Higher in Case	0.00580967	Infant Fecal Microbiome (Taxa) at 5-6m
infant_taxa_56	2	Sellimonas.sp002161525	5-6 months	0.027894	0.190179	Higher in Case	0.00530487	Infant Fecal Microbiome (Taxa) at 5-6m
infant_taxa_56	2	UMGS1071.sp900542375	5-6 months	0.0276988	0.19105	Higher in Case	0.00529185	Infant Fecal Microbiome (Taxa) at 5-6m
infant_taxa_56	2	Dermabacter.hominis	5-6 months	0.0276792	0.191132	Higher in Case	0.00529038	Infant Fecal Microbiome (Taxa) at 5-6m
infant_taxa_56	2	Enterococcus_A.avium	5-6 months	0.0438727	0.101479	Higher in Case	0.00445216	Infant Fecal Microbiome (Taxa) at 5-6m
infant_taxa_56	2	Unknown_CAG.274	5-6 months	-0.0463859	-0.0770953	Lower in Case	0.00357614	Infant Fecal Microbiome (Taxa) at 5-6m
infant_taxa_56	2	Eggerthella.lenta	5-6 months	-0.0688735	0.0299091	Higher in Case	0.00205994	Infant Fecal Microbiome (Taxa) at 5-6m
infant_taxa_56	2	Alistipes.sp900549305	5-6 months	-0.0191011	-0.0672845	Lower in Case	0.00128521	Infant Fecal Microbiome (Taxa) at 5-6m
infant_taxa_56	2	Proteus.mirabilis	5-6 months	-0.0581002	0.0186616	Higher in Case	0.00108424	Infant Fecal Microbiome (Taxa) at 5-6m
infant_taxa_56	2	Unknown_Veillonella.11	5-6 months	0.0339273	0.00659991	Higher in Case	0.000223917	Infant Fecal Microbiome (Taxa) at 5-6m
infant_vams_34	2	vam_2005999	3-4 months	0.269955	0.380341	Higher in Case	0.102675	Infant VAMS at 3-4m	277.217	435	negative	E525;E574	C06426;C06427;C14762;C14826;C14825	(6Z,9Z,12Z)-Octadecatrienoic acid; 6,9,12-Octadecatrienoic acid; gamma-Linolenic acid; Gamolenic acid$(9Z,12Z,15Z)-Octadecatrienoic acid; alpha-Linolenic acid; 9,12,15-Octadecatrienoic acid; Linolenate; alpha-Linolenate;13(S)-HODE; (13S)-Hydroxyoctadecadienoic acid; (9Z, 11E)-(13S)-13-Hydroxyoctadeca-9,11-dienoic acid$12(13)-EpOME; (12R,13S)-(9Z)-12,13-Epoxyoctadecenoic acid$9(10)-EpOME; (9R,10S)…
infant_vams_34	2	vam_2022966	3-4 months	0.355592	0.257383	Higher in Case	0.0915235	Infant VAMS at 3-4m	650.968	181	negative
infant_vams_34	2	vam_2024111	3-4 months	-0.234532	-0.174768	Lower in Case	0.0409888	Infant VAMS at 3-4m	667.46	402	negative
infant_vams_34	2	vam_2023221	3-4 months	-0.304475	-0.127782	Lower in Case	0.0389065	Infant VAMS at 3-4m	653.445	402	negative
infant_vams_34	2	vam_2002668	3-4 months	0.118922	0.2566	Higher in Case	0.0305155	Infant VAMS at 3-4m	181.177	385	negative
infant_vams_34	2	vam_1014913	3-4 months	0.0949109	0.301098	Higher in Case	0.0285775	Infant VAMS at 3-4m	499.286	333	positive
infant_vams_34	2	vam_2001501	3-4 months	0.129001	0.204595	Higher in Case	0.0263929	Infant VAMS at 3-4m	148.864	133	negative
infant_vams_34	2	vam_2002537	3-4 months	0.147746	0.166003	Higher in Case	0.0245264	Infant VAMS at 3-4m	179.122	388	negative
infant_vams_34	2	vam_1002242	3-4 months	-0.321996	-0.0758484	Lower in Case	0.0244229	Infant VAMS at 3-4m	185.096	0.35	positive
infant_vams_34	2	vam_2026012	3-4 months	0.13209	0.182297	Higher in Case	0.0240797	Infant VAMS at 3-4m	704.619	631	negative
infant_vams_34	2	vam_2015910	3-4 months	0.108283	0.197863	Higher in Case	0.0214253	Infant VAMS at 3-4m	500.978	181	negative
infant_vams_34	2	vam_1007789	3-4 months	-0.301223	0.0702284	Higher in Case	0.0211544	Infant VAMS at 3-4m	342.202	317	positive
infant_vams_34	2	vam_1027922	3-4 months	0.0854461	0.236701	Higher in Case	0.0202251	Infant VAMS at 3-4m	750.537	469	positive
infant_vams_34	2	vam_1002087	3-4 months	-0.149138	-0.133065	Lower in Case	0.019845	Infant VAMS at 3-4m	181.026	119	positive
infant_vams_34	2	vam_2005710	3-4 months	0.0737649	0.251018	Higher in Case	0.0185163	Infant VAMS at 3-4m	269.013	188	negative
infant_vams_34	2	vam_2043506	3-4 months	-0.133069	0.127112	Higher in Case	0.0169146	Infant VAMS at 3-4m	1280.14	433	negative
infant_vams_34	2	vam_2000642	3-4 months	0.100214	0.157799	Higher in Case	0.0158137	Infant VAMS at 3-4m	126.004	0.15	negative
infant_vams_34	2	vam_2003174	3-4 months	0.108513	0.143857	Higher in Case	0.0156104	Infant VAMS at 3-4m	191.07	617	negative	E630	C02325	Sinapyl alcohol; Sinapoyl alcohol
infant_vams_34	2	vam_1000285	3-4 months	-0.131383	-0.11101	Lower in Case	0.0145847	Infant VAMS at 3-4m	109.065	319	positive	E879;E1094	C04043;C00642;C05852;C07086;C03765	3,4-Dihydroxyphenylacetaldehyde; Protocatechuatealdehyde$4-Hydroxyphenylacetate$2-Hydroxyphenylacetate;Phenylacetic acid; Benzylformic acid; Phenylacetate; Benzeneacetiic acid$4-Hydroxyphenylacetaldehyde
infant_vams_34	2	vam_1025627	3-4 months	0.15741	0.0809497	Higher in Case	0.0127423	Infant VAMS at 3-4m	707.539	488	positive
infant_vams_34	2	vam_1002130	3-4 months	-0.335177	-0.0359101	Lower in Case	0.0120362	Infant VAMS at 3-4m	182.084	348	positive
infant_vams_34	2	vam_1027093	3-4 months	0.147145	0.0690521	Higher in Case	0.0101607	Infant VAMS at 3-4m	730.539	477	positive
infant_vams_34	2	vam_2009516	3-4 months	-0.060501	-0.162934	Lower in Case	0.00985768	Infant VAMS at 3-4m	346.056	144	negative	E169;E795	C00360;C00020;C00362	dAMP;AMP$dGMP
infant_vams_34	2	vam_2001411	3-4 months	0.0488634	0.198591	Higher in Case	0.00970384	Infant VAMS at 3-4m	143.992	177	negative
infant_vams_34	2	vam_1002160	3-4 months	0.0485098	0.17947	Higher in Case	0.00870604	Infant VAMS at 3-4m	183.077	323	positive	E20	C06423	Octanoic acid; Caprylic acid; Octylic acid
infant_vams_34	2	vam_2000044	3-4 months	-0.035708	-0.238587	Lower in Case	0.00851947	Infant VAMS at 3-4m	78.92	129	negative
infant_vams_34	2	vam_2034374	3-4 months	-0.144477	-0.0483574	Lower in Case	0.00698654	Infant VAMS at 3-4m	854.399	417	negative
infant_vams_34	2	vam_1022378	3-4 months	0.0315267	0.217761	Higher in Case	0.00686528	Infant VAMS at 3-4m	658.758	567	positive
infant_vams_34	2	vam_1002161	3-4 months	0.0720341	0.0866332	Higher in Case	0.00624054	Infant VAMS at 3-4m	183.077	0.34	positive	E20	C06423	Octanoic acid; Caprylic acid; Octylic acid
infant_vams_34	2	vam_2022347	3-4 months	-0.161314	-0.0379433	Lower in Case	0.0061208	Infant VAMS at 3-4m	638.429	402	negative
infant_vams_34	2	vam_1002158	3-4 months	-0.100115	-0.0556626	Lower in Case	0.00557267	Infant VAMS at 3-4m	183.066	325	positive	E800;E1607	C05838;C00811;C02763;C00166;C05583;C05582	cis-2-Hydroxycinnamate; 2-Coumarinate$4-Coumarate; p-Coumaric acid; trans-4-Hydroxycinnamate; trans-p-Hydroxycinnamate; 4-Hydroxycinnamic acid; 4-Hydroxycinnamate$enol-Phenylpyruvate$Phenylpyruvate;3-Methoxy-4-hydroxyphenylglycolaldehyde$Homovanillate; Homovanillic acid
infant_vams_34	2	vam_2034328	3-4 months	-0.0777445	-0.0710254	Lower in Case	0.00552183	Infant VAMS at 3-4m	853.399	406	negative
infant_vams_34	2	vam_2024896	3-4 months	-0.114445	-0.0480942	Lower in Case	0.00550415	Infant VAMS at 3-4m	681.477	406	negative
infant_vams_34	2	vam_1006512	3-4 months	0.0555553	0.0887334	Higher in Case	0.00492961	Infant VAMS at 3-4m	311.211	333	positive
infant_vams_34	2	vam_1016028	3-4 months	0.036912	0.120152	Higher in Case	0.00443506	Infant VAMS at 3-4m	519.369	415	positive
infant_vams_34	2	vam_1013662	3-4 months	0.032907	0.132579	Higher in Case	0.00436277	Infant VAMS at 3-4m	475.25	331	positive
infant_vams_34	2	vam_2008652	3-4 months	-0.0609737	-0.0700767	Lower in Case	0.00427283	Infant VAMS at 3-4m	327.183	0.4	negative
infant_vams_34	2	vam_2006866	3-4 months	-0.0528469	-0.0746686	Lower in Case	0.00394601	Infant VAMS at 3-4m	294.179	394	negative
infant_vams_34	2	vam_2032504	3-4 months	0.035569	0.110388	Higher in Case	0.0039264	Infant VAMS at 3-4m	828.989	183	negative
infant_vams_34	2	vam_1020089	3-4 months	-0.0468558	-0.0729876	Lower in Case	0.00341989	Infant VAMS at 3-4m	618.183	369	positive	E2410	C00032	Protoheme
infant_vams_34	2	vam_1006580	3-4 months	0.0213611	0.154316	Higher in Case	0.00329637	Infant VAMS at 3-4m	313.079	319	positive
infant_vams_34	2	vam_1000366	3-4 months	0.025033	0.111063	Higher in Case	0.00278024	Infant VAMS at 3-4m	115.112	85	positive
infant_vams_34	2	vam_1023554	3-4 months	0.0427298	0.0602787	Higher in Case	0.0025757	Infant VAMS at 3-4m	677.556	433	positive
infant_vams_34	2	vam_1006685	3-4 months	-0.0512769	-0.0385751	Lower in Case	0.00197801	Infant VAMS at 3-4m	315.196	335	positive	E532;E599	C04707;C06439;C00762;C01780	(5Z,13E)-11alpha-Hydroxy-9,15-dioxoprost-13-enoate; (5Z)-(15S)-11alpha-Hydroxy-9,15-dioxoprosta-13-enoate$Prostaglandin E3;Cortisone; 17alpha,21-Dihydroxy-4-pregnene-3,11,20-trione; Kendall's compound E; Reichstein's substance Fa$Aldosterone; 11beta,21-Dihydroxy-3,20-dioxo-4-pregnen-18-al
infant_vams_34	2	vam_1001281	3-4 months	0.0148919	0.11447	Higher in Case	0.00170468	Infant VAMS at 3-4m	156.011	342	positive
infant_vams_34	2	vam_1002380	3-4 months	-0.0507171	-0.0271553	Lower in Case	0.00137724	Infant VAMS at 3-4m	189.128	0.36	positive
infant_vams_34	2	vam_1004782	3-4 months	-0.0309074	-0.0321435	Lower in Case	0.000993471	Infant VAMS at 3-4m	265.183	323	positive
infant_vams_34	2	vam_1026609	3-4 months	0.017837	0.0370851	Higher in Case	0.000661487	Infant VAMS at 3-4m	725.557	454	positive
infant_vams_34	2	vam_2011641	3-4 months	-0.0134703	-0.0249428	Lower in Case	0.000335988	Infant VAMS at 3-4m	407.188	402	negative
infant_vams_34	2	vam_2009340	3-4 months	-0.00193132	-0.0479286	Lower in Case	9.25654e-05	Infant VAMS at 3-4m	341.198	406	negative
maternal_gene_56	2	GH39_0	5-6 months	-0.618039	-0.0982906	Lower in Case	0.0607474	Maternal Fecal Metagenome (Genes) at 5-6m
maternal_gene_56	2	CBM9_0	5-6 months	-0.57461	-0.0853466	Lower in Case	0.049041	Maternal Fecal Metagenome (Genes) at 5-6m
maternal_gene_56	2	GH38_0	5-6 months	-0.267233	-0.0547084	Lower in Case	0.0146199	Maternal Fecal Metagenome (Genes) at 5-6m
maternal_gene_56	2	K01552	5-6 months	-0.179581	-0.0592172	Lower in Case	0.0106343	Maternal Fecal Metagenome (Genes) at 5-6m
maternal_gene_56	2	K02124	5-6 months	-0.165475	-0.0519691	Lower in Case	0.00859961	Maternal Fecal Metagenome (Genes) at 5-6m
maternal_gene_56	2	3002936	5-6 months	-0.104411	-0.0754405	Lower in Case	0.00787685	Maternal Fecal Metagenome (Genes) at 5-6m
maternal_gene_56	2	K02122	5-6 months	-0.114381	-0.0607032	Lower in Case	0.00694331	Maternal Fecal Metagenome (Genes) at 5-6m
maternal_gene_56	2	K02032	5-6 months	-0.145794	-0.0405001	Lower in Case	0.00590469	Maternal Fecal Metagenome (Genes) at 5-6m
maternal_gene_56	2	cellulosomeSLH_0	5-6 months	-0.096786	-0.0585698	Lower in Case	0.00566873	Maternal Fecal Metagenome (Genes) at 5-6m
maternal_gene_56	2	K14336	5-6 months	-0.111189	-0.0408103	Lower in Case	0.00453767	Maternal Fecal Metagenome (Genes) at 5-6m
maternal_gene_56	2	K02120	5-6 months	-0.0742106	-0.0467344	Lower in Case	0.00346819	Maternal Fecal Metagenome (Genes) at 5-6m
maternal_gene_56	2	K23536	5-6 months	-0.0626557	-0.0438183	Lower in Case	0.00274546	Maternal Fecal Metagenome (Genes) at 5-6m
maternal_gene_56	2	K01271	5-6 months	-0.0771885	-0.0325843	Lower in Case	0.00251514	Maternal Fecal Metagenome (Genes) at 5-6m
maternal_gene_56	2	3004032	5-6 months	-0.123275	-0.0193745	Lower in Case	0.00238839	Maternal Fecal Metagenome (Genes) at 5-6m
maternal_gene_56	2	K00335	5-6 months	-0.0606516	-0.0338088	Lower in Case	0.00205056	Maternal Fecal Metagenome (Genes) at 5-6m
maternal_gene_56	2	K03469	5-6 months	-0.0455321	-0.0418491	Lower in Case	0.00190548	Maternal Fecal Metagenome (Genes) at 5-6m
maternal_gene_56	2	K01126	5-6 months	-0.0569156	-0.0320057	Lower in Case	0.00182162	Maternal Fecal Metagenome (Genes) at 5-6m
maternal_gene_56	2	GH78_0	5-6 months	-0.0683654	-0.0255695	Lower in Case	0.00174807	Maternal Fecal Metagenome (Genes) at 5-6m
maternal_gene_56	2	K16786	5-6 months	-0.0407273	-0.0413548	Lower in Case	0.00168427	Maternal Fecal Metagenome (Genes) at 5-6m
maternal_gene_56	2	3004036	5-6 months	-0.044085	-0.0380535	Lower in Case	0.00167759	Maternal Fecal Metagenome (Genes) at 5-6m
maternal_gene_56	2	K02036	5-6 months	-0.0506952	-0.0310464	Lower in Case	0.00157391	Maternal Fecal Metagenome (Genes) at 5-6m
maternal_gene_56	2	K05833	5-6 months	-0.0553811	-0.0237649	Lower in Case	0.00131613	Maternal Fecal Metagenome (Genes) at 5-6m
maternal_gene_56	2	K02035	5-6 months	-0.0880401	-0.0143994	Lower in Case	0.00126772	Maternal Fecal Metagenome (Genes) at 5-6m
maternal_gene_56	2	K21600	5-6 months	-0.0404322	-0.0283475	Lower in Case	0.00114615	Maternal Fecal Metagenome (Genes) at 5-6m
maternal_gene_56	2	K20590	5-6 months	-0.0542559	-0.0195077	Lower in Case	0.00105841	Maternal Fecal Metagenome (Genes) at 5-6m
maternal_gene_56	2	K20571	5-6 months	-0.0581091	-0.0182132	Lower in Case	0.00105835	Maternal Fecal Metagenome (Genes) at 5-6m
maternal_gene_56	2	GH109_0	5-6 months	-0.0530652	-0.0187157	Lower in Case	0.00099315	Maternal Fecal Metagenome (Genes) at 5-6m
maternal_gene_56	2	K04070	5-6 months	-0.0403324	-0.0236156	Lower in Case	0.000952474	Maternal Fecal Metagenome (Genes) at 5-6m
maternal_gene_56	2	K07030	5-6 months	-0.0183575	-0.0421762	Lower in Case	0.000774248	Maternal Fecal Metagenome (Genes) at 5-6m
maternal_gene_56	2	K00864	5-6 months	-0.0633478	-0.0107836	Lower in Case	0.000683121	Maternal Fecal Metagenome (Genes) at 5-6m
maternal_gene_56	2	K00003	5-6 months	-0.026718	-0.0217531	Lower in Case	0.000581198	Maternal Fecal Metagenome (Genes) at 5-6m
maternal_gene_56	2	K01938	5-6 months	-0.0266924	-0.0216357	Lower in Case	0.000577508	Maternal Fecal Metagenome (Genes) at 5-6m
maternal_gene_56	2	K01163	5-6 months	-0.0164509	-0.0316633	Lower in Case	0.000520888	Maternal Fecal Metagenome (Genes) at 5-6m
maternal_gene_56	2	K01995	5-6 months	-0.0167147	-0.0304566	Lower in Case	0.000509072	Maternal Fecal Metagenome (Genes) at 5-6m
maternal_gene_56	2	K07574	5-6 months	-0.0161266	-0.0273707	Lower in Case	0.000441396	Maternal Fecal Metagenome (Genes) at 5-6m
maternal_gene_56	2	K03616	5-6 months	-0.0168556	-0.0251604	Lower in Case	0.000424094	Maternal Fecal Metagenome (Genes) at 5-6m
maternal_gene_56	2	K16785	5-6 months	-0.0117097	-0.0361029	Lower in Case	0.000422752	Maternal Fecal Metagenome (Genes) at 5-6m
maternal_gene_56	2	K02071	5-6 months	-0.0268028	-0.0142767	Lower in Case	0.000382656	Maternal Fecal Metagenome (Genes) at 5-6m
maternal_gene_56	2	K02031	5-6 months	-0.0141265	-0.027043	Lower in Case	0.000382022	Maternal Fecal Metagenome (Genes) at 5-6m
maternal_gene_56	2	K03613	5-6 months	-0.0268455	-0.0123927	Lower in Case	0.000332689	Maternal Fecal Metagenome (Genes) at 5-6m
maternal_gene_56	2	K02034	5-6 months	-0.012551	-0.0226574	Lower in Case	0.000284373	Maternal Fecal Metagenome (Genes) at 5-6m
maternal_gene_56	2	K00334	5-6 months	-0.00785139	-0.0268961	Lower in Case	0.000211171	Maternal Fecal Metagenome (Genes) at 5-6m
maternal_gene_56	2	K01996	5-6 months	-0.00724352	-0.0286118	Lower in Case	0.00020725	Maternal Fecal Metagenome (Genes) at 5-6m
maternal_gene_56	2	K20983	5-6 months	-0.0847122	-0.00164319	Lower in Case	0.000139198	Maternal Fecal Metagenome (Genes) at 5-6m
maternal_gene_56	2	K02033	5-6 months	-0.00576125	-0.0187503	Lower in Case	0.000108025	Maternal Fecal Metagenome (Genes) at 5-6m
maternal_gene_56	2	K19294	5-6 months	-0.0076496	-0.00875	Lower in Case	6.6934e-05	Maternal Fecal Metagenome (Genes) at 5-6m
maternal_gene_56	2	K02030	5-6 months	-0.00110362	-0.00968171	Lower in Case	1.06849e-05	Maternal Fecal Metagenome (Genes) at 5-6m
maternal_gene_56	2	K07335	5-6 months	-0.000301495	-0.03182	Lower in Case	9.59357e-06	Maternal Fecal Metagenome (Genes) at 5-6m
maternal_gene_56	2	AA6_0	5-6 months	-0.00178849	-0.00501317	Lower in Case	8.96604e-06	Maternal Fecal Metagenome (Genes) at 5-6m
maternal_gene_56	2	CBM67_0	5-6 months	-0.0018558	-3.97923e-05	Lower in Case	7.38467e-08	Maternal Fecal Metagenome (Genes) at 5-6m
maternal_prot_dep_56	2	P55201	5-6 months	-0.353213	-0.0834616	Lower in Case	0.0294798	Plasma Proteome (Depleted) at 5-6m
maternal_prot_dep_56	2	A0A0C4DH29	5-6 months	-0.356123	-0.0650346	Lower in Case	0.0231603	Plasma Proteome (Depleted) at 5-6m
maternal_prot_dep_56	2	P52209	5-6 months	-0.376821	-0.0557873	Lower in Case	0.0210218	Plasma Proteome (Depleted) at 5-6m
maternal_prot_dep_56	2	A8MT70	5-6 months	-0.232664	-0.0853865	Lower in Case	0.0198663	Plasma Proteome (Depleted) at 5-6m
maternal_prot_dep_56	2	P00558	5-6 months	-0.370812	-0.0490917	Lower in Case	0.0182038	Plasma Proteome (Depleted) at 5-6m
maternal_prot_dep_56	2	P04406	5-6 months	-0.250353	-0.0454946	Lower in Case	0.0113897	Plasma Proteome (Depleted) at 5-6m
maternal_prot_dep_56	2	P62937	5-6 months	-0.187143	-0.0599893	Lower in Case	0.0112265	Plasma Proteome (Depleted) at 5-6m
maternal_prot_dep_56	2	Q6JQN1	5-6 months	-0.267576	-0.038389	Lower in Case	0.010272	Plasma Proteome (Depleted) at 5-6m
maternal_prot_dep_56	2	Q13451	5-6 months	-0.232031	-0.0290901	Lower in Case	0.00674979	Plasma Proteome (Depleted) at 5-6m
maternal_prot_dep_56	2	Q9NZ71	5-6 months	-0.122658	0.039068	Higher in Case	0.00479201	Plasma Proteome (Depleted) at 5-6m
maternal_prot_dep_56	2	P02766	5-6 months	-0.0694094	-0.0681819	Lower in Case	0.00473246	Plasma Proteome (Depleted) at 5-6m
maternal_prot_dep_56	2	P07225	5-6 months	0.0669941	0.0529366	Higher in Case	0.00354644	Plasma Proteome (Depleted) at 5-6m
maternal_prot_dep_56	2	Q99707	5-6 months	-0.069765	-0.0500416	Lower in Case	0.00349115	Plasma Proteome (Depleted) at 5-6m
maternal_prot_dep_56	2	P51884	5-6 months	0.0255938	0.13406	Higher in Case	0.00343109	Plasma Proteome (Depleted) at 5-6m
maternal_prot_dep_56	2	O43490	5-6 months	-0.194817	-0.0172179	Lower in Case	0.00335434	Plasma Proteome (Depleted) at 5-6m
maternal_prot_dep_56	2	Q6PEZ8	5-6 months	-0.142659	0.021437	Higher in Case	0.00305818	Plasma Proteome (Depleted) at 5-6m
maternal_prot_dep_56	2	P23142	5-6 months	0.0268274	0.106215	Higher in Case	0.00284947	Plasma Proteome (Depleted) at 5-6m
maternal_prot_dep_56	2	Q8IW92	5-6 months	-0.026902	-0.0955732	Lower in Case	0.00257111	Plasma Proteome (Depleted) at 5-6m
maternal_prot_dep_56	2	Q08378	5-6 months	-0.103591	-0.020684	Lower in Case	0.00214267	Plasma Proteome (Depleted) at 5-6m
maternal_prot_dep_56	2	P60174	5-6 months	-0.0322735	-0.0449312	Lower in Case	0.00145009	Plasma Proteome (Depleted) at 5-6m
maternal_prot_dep_56	2	Q9P0W8	5-6 months	-0.150344	0.00819222	Higher in Case	0.00123165	Plasma Proteome (Depleted) at 5-6m
maternal_prot_dep_56	2	Q9Y4F9	5-6 months	-0.00952259	-0.125394	Lower in Case	0.00119408	Plasma Proteome (Depleted) at 5-6m
maternal_prot_dep_56	2	O75132	5-6 months	-0.164163	-0.00682698	Lower in Case	0.00112073	Plasma Proteome (Depleted) at 5-6m
maternal_prot_dep_56	2	P00338	5-6 months	-0.142782	0.00683277	Higher in Case	0.000975593	Plasma Proteome (Depleted) at 5-6m
maternal_prot_dep_56	2	Q99784	5-6 months	-0.142234	-0.000966052	Lower in Case	0.000137405	Plasma Proteome (Depleted) at 5-6m
maternal_prot_nav_56	2	P10643	5-6 months	0.391403	0.258931	Higher in Case	0.101347	Plasma Proteome (Naive) at 5-6m
maternal_prot_nav_56	2	Q9UK99	5-6 months	0.37862	0.232401	Higher in Case	0.0879917	Plasma Proteome (Naive) at 5-6m
maternal_prot_nav_56	2	O75882	5-6 months	0.427468	0.109548	Higher in Case	0.0468281	Plasma Proteome (Naive) at 5-6m
maternal_prot_nav_56	2	P48740	5-6 months	-0.285564	-0.152244	Lower in Case	0.0434753	Plasma Proteome (Naive) at 5-6m
maternal_prot_nav_56	2	A0A0J9YXX1	5-6 months	0.169289	0.233318	Higher in Case	0.0394982	Plasma Proteome (Naive) at 5-6m
maternal_prot_nav_56	2	P51797	5-6 months	0.101529	0.334775	Higher in Case	0.0339893	Plasma Proteome (Naive) at 5-6m
maternal_prot_nav_56	2	P27169	5-6 months	0.204586	0.165504	Higher in Case	0.0338599	Plasma Proteome (Naive) at 5-6m
maternal_prot_nav_56	2	P32119	5-6 months	0.442238	0.065665	Higher in Case	0.0290396	Plasma Proteome (Naive) at 5-6m
maternal_prot_nav_56	2	O43866	5-6 months	0.143065	0.195877	Higher in Case	0.0280231	Plasma Proteome (Naive) at 5-6m
maternal_prot_nav_56	2	P29622	5-6 months	0.127175	0.215928	Higher in Case	0.0274607	Plasma Proteome (Naive) at 5-6m
maternal_prot_nav_56	2	P51884	5-6 months	0.131889	0.206802	Higher in Case	0.0272749	Plasma Proteome (Naive) at 5-6m
maternal_prot_nav_56	2	P11177	5-6 months	0.110629	0.238294	Higher in Case	0.0263623	Plasma Proteome (Naive) at 5-6m
maternal_prot_nav_56	2	Q7Z698	5-6 months	0.088866	0.203169	Higher in Case	0.0180548	Plasma Proteome (Naive) at 5-6m
maternal_prot_nav_56	2	Q13790	5-6 months	0.148439	0.113454	Higher in Case	0.016841	Plasma Proteome (Naive) at 5-6m
maternal_prot_nav_56	2	P36980	5-6 months	0.0877704	0.190239	Higher in Case	0.0166973	Plasma Proteome (Naive) at 5-6m
maternal_prot_nav_56	2	P07225	5-6 months	0.0877183	0.125183	Higher in Case	0.0109808	Plasma Proteome (Naive) at 5-6m
maternal_prot_nav_56	2	P02766	5-6 months	-0.195126	-0.0539294	Lower in Case	0.010523	Plasma Proteome (Naive) at 5-6m
maternal_prot_nav_56	2	P02775	5-6 months	0.0425299	0.211368	Higher in Case	0.00898945	Plasma Proteome (Naive) at 5-6m
maternal_prot_nav_56	2	P07996	5-6 months	0.0518152	0.157352	Higher in Case	0.0081532	Plasma Proteome (Naive) at 5-6m
maternal_prot_nav_56	2	P01703	5-6 months	0.0384996	0.181174	Higher in Case	0.00697513	Plasma Proteome (Naive) at 5-6m
maternal_prot_nav_56	2	P04003	5-6 months	0.0366548	0.155001	Higher in Case	0.00568153	Plasma Proteome (Naive) at 5-6m
maternal_prot_nav_56	2	Q96PD5	5-6 months	0.0550815	0.0933668	Higher in Case	0.00514279	Plasma Proteome (Naive) at 5-6m
maternal_prot_nav_56	2	P55056	5-6 months	0.0465697	0.0907203	Higher in Case	0.00422482	Plasma Proteome (Naive) at 5-6m
maternal_prot_nav_56	2	P02655	5-6 months	0.0228504	0.0384637	Higher in Case	0.000878911	Plasma Proteome (Naive) at 5-6m
maternal_prot_nav_56	2	P15169	5-6 months	0.00748333	0.0942106	Higher in Case	0.000705009	Plasma Proteome (Naive) at 5-6m
maternal_taxa_56	2	UBA737.sp002431945	5-6 months	-0.468408	-0.221093	Lower in Case	0.103562	Maternal Fecal Microbiome (Taxa) at 5-6m
maternal_taxa_56	2	Unknown_CAG.110.13	5-6 months	-0.308227	-0.228802	Lower in Case	0.0705231	Maternal Fecal Microbiome (Taxa) at 5-6m
maternal_taxa_56	2	Unknown_Lachnospiraceae.7	5-6 months	-0.303367	-0.228548	Lower in Case	0.0693339	Maternal Fecal Microbiome (Taxa) at 5-6m
maternal_taxa_56	2	Unknown_CAG.110.26	5-6 months	-0.307815	-0.219283	Lower in Case	0.0674986	Maternal Fecal Microbiome (Taxa) at 5-6m
maternal_taxa_56	2	Unknown_Faecalibacterium.3	5-6 months	0.272453	0.232418	Higher in Case	0.0633231	Maternal Fecal Microbiome (Taxa) at 5-6m
maternal_taxa_56	2	RC9.sp000433355	5-6 months	-0.246019	-0.219707	Lower in Case	0.0540521	Maternal Fecal Microbiome (Taxa) at 5-6m
maternal_taxa_56	2	Unknown_CAG.83.14	5-6 months	-0.225495	-0.198075	Lower in Case	0.0446649	Maternal Fecal Microbiome (Taxa) at 5-6m
maternal_taxa_56	2	ER4.sp000765235	5-6 months	-0.207103	-0.183179	Lower in Case	0.0379368	Maternal Fecal Microbiome (Taxa) at 5-6m
maternal_taxa_56	2	Prevotella.sp900544825	5-6 months	0.227009	0.159914	Higher in Case	0.0363019	Maternal Fecal Microbiome (Taxa) at 5-6m
maternal_taxa_56	2	Unknown_Lawsonibacter.4	5-6 months	-0.255844	-0.140034	Lower in Case	0.035827	Maternal Fecal Microbiome (Taxa) at 5-6m
maternal_taxa_56	2	Unknown_Prevotella.1	5-6 months	0.167318	0.211079	Higher in Case	0.0353173	Maternal Fecal Microbiome (Taxa) at 5-6m
maternal_taxa_56	2	CAG.110.sp900540635	5-6 months	-0.168972	-0.195388	Lower in Case	0.0330151	Maternal Fecal Microbiome (Taxa) at 5-6m
maternal_taxa_56	2	Unknown_UBA1381.6	5-6 months	-0.140684	-0.20104	Lower in Case	0.0282829	Maternal Fecal Microbiome (Taxa) at 5-6m
maternal_taxa_56	2	Unknown_SFFH01.1	5-6 months	-0.176098	-0.135028	Lower in Case	0.0237781	Maternal Fecal Microbiome (Taxa) at 5-6m
maternal_taxa_56	2	UBA6398.sp003150315	5-6 months	-0.105719	-0.168171	Lower in Case	0.0177788	Maternal Fecal Microbiome (Taxa) at 5-6m
maternal_taxa_56	2	Acetatifactor.sp900066365	5-6 months	0.125407	0.14165	Higher in Case	0.0177639	Maternal Fecal Microbiome (Taxa) at 5-6m
maternal_taxa_56	2	CAG.83.sp900545495	5-6 months	-0.0696699	-0.211328	Lower in Case	0.0147232	Maternal Fecal Microbiome (Taxa) at 5-6m
maternal_taxa_56	2	CAG.83.sp900545495.1	5-6 months	-0.0754344	-0.182567	Lower in Case	0.0137719	Maternal Fecal Microbiome (Taxa) at 5-6m
maternal_taxa_56	2	UMGS1820.sp900545865	5-6 months	-0.0555539	-0.203074	Lower in Case	0.0112816	Maternal Fecal Microbiome (Taxa) at 5-6m
maternal_taxa_56	2	Phocaeicola.sp000434735	5-6 months	0.0464663	0.24166	Higher in Case	0.011229	Maternal Fecal Microbiome (Taxa) at 5-6m
maternal_taxa_56	2	UMGS1600.sp900553315	5-6 months	-0.040859	-0.217967	Lower in Case	0.00890591	Maternal Fecal Microbiome (Taxa) at 5-6m
maternal_taxa_56	2	Olsenella_E.sp003609875	5-6 months	-0.0372182	-0.164626	Lower in Case	0.00612707	Maternal Fecal Microbiome (Taxa) at 5-6m
maternal_taxa_56	2	CAG.83.sp900552725	5-6 months	-0.00551284	-0.178305	Lower in Case	0.000982966	Maternal Fecal Microbiome (Taxa) at 5-6m
maternal_taxa_56	2	Unknown_CAG.103	5-6 months	-0.0139485	-0.030393	Lower in Case	0.000423938	Maternal Fecal Microbiome (Taxa) at 5-6m
maternal_taxa_56	2	Angelakisella.sp004557855	5-6 months	-0.00121392	-0.0795668	Lower in Case	9.65876e-05	Maternal Fecal Microbiome (Taxa) at 5-6m
maternal_vams_56	2	vam_1001290	5-6 months	0.22633	0.426642	Higher in Case	0.096562	Maternal VAMS at 5-6m	156.103	319	positive	E58	C00483;C01183;C02735	Tyramine$N,N-Dimethylaniline N-oxide$Phenylethanolamine; 2-Amino-1-phenylethanol
maternal_vams_56	2	vam_2010243	5-6 months	0.213869	0.340288	Higher in Case	0.0727769	Maternal VAMS at 5-6m	367.358	627	negative
maternal_vams_56	2	vam_1011823	5-6 months	-0.355836	-0.14632	Lower in Case	0.052066	Maternal VAMS at 5-6m	432.329	0.36	positive
maternal_vams_56	2	vam_2003937	5-6 months	0.154727	0.32469	Higher in Case	0.0502383	Maternal VAMS at 5-6m	217.05	217	negative
maternal_vams_56	2	vam_1008981	5-6 months	-0.577102	-0.0839059	Lower in Case	0.0484222	Maternal VAMS at 5-6m	370.299	363	positive
maternal_vams_56	2	vam_1010598	5-6 months	-0.407708	-0.113085	Lower in Case	0.0461057	Maternal VAMS at 5-6m	404.345	377	positive
maternal_vams_56	2	vam_2003116	5-6 months	0.133875	0.319305	Higher in Case	0.0427471	Maternal VAMS at 5-6m	189.041	0.16	negative	E12;E15;E23	C01732;C00490;C00944;C02147	Mesaconate; 2-Methylfumarate; Mesaconic acid; Methylfumaric acid$Itaconate; Itaconic acid; Methylenesuccinic acid;3-Dehydroquinate; 5-Dehydroquinate; 3-Dehydroquinic acid; 5-Dehydroquinic acid;Dihydrolipoate; Dihydrolipoic acid; Dihydrothioctic acid
maternal_vams_56	2	vam_2009491	5-6 months	0.151654	0.248527	Higher in Case	0.0376902	Maternal VAMS at 5-6m	345.062	0.39	negative
maternal_vams_56	2	vam_2003610	5-6 months	0.129544	0.227035	Higher in Case	0.029411	Maternal VAMS at 5-6m	205.033	0.14	negative	E88	C00026	2-Oxoglutarate
maternal_vams_56	2	vam_1000356	5-6 months	-0.240703	-0.0928776	Lower in Case	0.0223559	Maternal VAMS at 5-6m	115.056	106	positive
maternal_vams_56	2	vam_2032739	5-6 months	0.0898512	0.232944	Higher in Case	0.0209303	Maternal VAMS at 5-6m	832.873	642	negative
maternal_vams_56	2	vam_2010147	5-6 months	-0.161647	-0.127121	Lower in Case	0.0205488	Maternal VAMS at 5-6m	365.057	138	negative
maternal_vams_56	2	vam_2016484	5-6 months	-0.0810843	-0.247693	Lower in Case	0.020084	Maternal VAMS at 5-6m	514.298	404	negative
maternal_vams_56	2	vam_2038750	5-6 months	0.0714953	0.254866	Higher in Case	0.0182217	Maternal VAMS at 5-6m	978.799	631	negative
maternal_vams_56	2	vam_1027242	5-6 months	0.10125	0.157764	Higher in Case	0.0159736	Maternal VAMS at 5-6m	732.608	485	positive	E240	C00550	Sphingomyelin
maternal_vams_56	2	vam_1010698	5-6 months	-0.134788	0.110544	Higher in Case	0.0149	Maternal VAMS at 5-6m	406.296	0.35	positive
maternal_vams_56	2	vam_1002622	5-6 months	0.0581278	0.243995	Higher in Case	0.0141829	Maternal VAMS at 5-6m	196.137	342	positive
maternal_vams_56	2	vam_2008651	5-6 months	-0.109293	-0.125347	Lower in Case	0.0136995	Maternal VAMS at 5-6m	327.178	392	negative
maternal_vams_56	2	vam_2013051	5-6 months	-0.0694648	-0.18654	Lower in Case	0.012958	Maternal VAMS at 5-6m	441.288	0.45	negative
maternal_vams_56	2	vam_1004417	5-6 months	0.0761273	0.156282	Higher in Case	0.0118973	Maternal VAMS at 5-6m	255.113	0.34	positive	E1871;E2304	C06868;C01598	Carbamazepine;Melatonin; N-Acetyl-5-methoxytryptamine
maternal_vams_56	2	vam_1031595	5-6 months	0.0650672	0.171334	Higher in Case	0.0111482	Maternal VAMS at 5-6m	812.607	496	positive
maternal_vams_56	2	vam_2017145	5-6 months	-0.0486126	-0.210715	Lower in Case	0.0102434	Maternal VAMS at 5-6m	529.3	458	negative
maternal_vams_56	2	vam_2018466	5-6 months	-0.0462745	-0.20804	Lower in Case	0.00962693	Maternal VAMS at 5-6m	557.294	0.45	negative
maternal_vams_56	2	vam_1027022	5-6 months	0.0557242	0.171611	Higher in Case	0.0095629	Maternal VAMS at 5-6m	729.588	458	positive
maternal_vams_56	2	vam_2027859	5-6 months	0.0526999	0.174326	Higher in Case	0.00918694	Maternal VAMS at 5-6m	743.539	625	negative
maternal_vams_56	2	vam_1027728	5-6 months	0.0531476	0.172083	Higher in Case	0.00914579	Maternal VAMS at 5-6m	744.555	0.49	positive
maternal_vams_56	2	vam_1001367	5-6 months	0.0271773	0.304677	Higher in Case	0.00828029	Maternal VAMS at 5-6m	159.028	92	positive	E228;E317;E318	C02670;C00072;glac;C01620;C00262	D-glucurono-6,3-lactone$L-Ascorbate$D-glucurono-6,3-lactone;;Hypoxanthine
maternal_vams_56	2	vam_2033874	5-6 months	0.0375215	0.203089	Higher in Case	0.00762019	Maternal VAMS at 5-6m	847.625	663	negative
maternal_vams_56	2	vam_1035143	5-6 months	0.0724994	0.0918878	Higher in Case	0.00666181	Maternal VAMS at 5-6m	878.209	579	positive
maternal_vams_56	2	vam_1007082	5-6 months	-0.0223173	-0.267074	Lower in Case	0.00596036	Maternal VAMS at 5-6m	325.146	342	positive	E232	CE5795	neuromedin B (1-3)
maternal_vams_56	2	vam_2015293	5-6 months	-0.0258919	-0.222913	Lower in Case	0.00577165	Maternal VAMS at 5-6m	486.289	444	negative
maternal_vams_56	2	vam_1034706	5-6 months	0.0326005	0.169818	Higher in Case	0.00553615	Maternal VAMS at 5-6m	866.8	596	positive
maternal_vams_56	2	vam_2026170	5-6 months	0.0304694	0.181607	Higher in Case	0.00553346	Maternal VAMS at 5-6m	708.649	633	negative
maternal_vams_56	2	vam_1031777	5-6 months	0.0360124	0.142028	Higher in Case	0.00511475	Maternal VAMS at 5-6m	815.698	506	positive
maternal_vams_56	2	vam_2039345	5-6 months	0.0195744	0.233974	Higher in Case	0.0045799	Maternal VAMS at 5-6m	1005.83	631	negative
maternal_vams_56	2	vam_1000752	5-6 months	0.0139984	0.231223	Higher in Case	0.00323676	Maternal VAMS at 5-6m	135.06	25	positive
maternal_vams_56	2	vam_1000140	5-6 months	-0.0680099	-0.0442665	Lower in Case	0.00301056	Maternal VAMS at 5-6m	98.976	623	positive
maternal_vams_56	2	vam_2008818	5-6 months	0.0126963	0.220393	Higher in Case	0.00279817	Maternal VAMS at 5-6m	329.13	196	negative
maternal_vams_56	2	vam_2032243	5-6 months	0.0185251	0.141221	Higher in Case	0.00261614	Maternal VAMS at 5-6m	824.539	627	negative
maternal_vams_56	2	vam_2012085	5-6 months	0.0152869	0.137817	Higher in Case	0.0021068	Maternal VAMS at 5-6m	418.975	181	negative
maternal_vams_56	2	vam_1001887	5-6 months	0.0074659	0.281177	Higher in Case	0.00209924	Maternal VAMS at 5-6m	175.001	92	positive	E317;E318	C01620;C00262	;Hypoxanthine
maternal_vams_56	2	vam_1001042	5-6 months	0.00996695	0.20056	Higher in Case	0.00199897	Maternal VAMS at 5-6m	147.118	65	positive
maternal_vams_56	2	vam_2020699	5-6 months	-0.014252	-0.131896	Lower in Case	0.00187979	Maternal VAMS at 5-6m	605.005	175	negative
maternal_vams_56	2	vam_2001506	5-6 months	0.0103785	0.138776	Higher in Case	0.00144029	Maternal VAMS at 5-6m	148.98	169	negative
maternal_vams_56	2	vam_2009436	5-6 months	-0.00712495	-0.194667	Lower in Case	0.00138699	Maternal VAMS at 5-6m	343.995	0.14	negative
maternal_vams_56	2	vam_1005424	5-6 months	-0.00764013	-0.173248	Lower in Case	0.00132364	Maternal VAMS at 5-6m	283.283	363	positive
maternal_vams_56	2	vam_1012365	5-6 months	-0.0268325	-0.0281979	Lower in Case	0.00075662	Maternal VAMS at 5-6m	445.349	377	positive
maternal_vams_56	2	vam_1029864	5-6 months	0.00481819	0.136375	Higher in Case	0.00065708	Maternal VAMS at 5-6m	789.618	506	positive
maternal_vams_56	2	vam_2003076	5-6 months	-0.0272655	0.00136015	Higher in Case	3.70852e-05	Maternal VAMS at 5-6m	188.011	288	negative	E310;E1010	C16615;C05577;C00544;C01161	6-Methylthiopurine 5'-monophosphate ribonucleotide; 6-Methylthioinosine-5'-monophosphate;3,4-Dihydroxymandelaldehyde$Homogentisate$3,4-Dihydroxyphenylacetate; 3,4-Dihydroxyphenylacetic acid; 3,4-Dihydroxyphenyl acetate; 3,4-Dihydroxyphenyl acetic acid; Homoprotocatechuate
maternal_vams_56	2	vam_1015090	5-6 months	-0.000171887	-0.0270651	Lower in Case	4.65214e-06	Maternal VAMS at 5-6m	502.335	367	positive
milk_bioactive_34	2	LH	3-4 months	0.965131	0.0635198	Higher in Case	0.0613049	Milk Bioactive Proteins at 3-4m
milk_bioactive_34	2	Insulin	3-4 months	0.260146	0.0815948	Higher in Case	0.0212266	Milk Bioactive Proteins at 3-4m
milk_bioactive_34	2	Calprotectin	3-4 months	-0.0290933	-0.170117	Lower in Case	0.00494926	Milk Bioactive Proteins at 3-4m
milk_hmo_34	2	FLNH_nmol/mL	3-4 months	-0.708115	-0.177707	Lower in Case	0.125837	Milk HMOs at 3-4m
milk_hmo_34	2	Secretor	3-4 months	0.437799	0.16988	Higher in Case	0.0743734	Milk HMOs at 3-4m
milk_hmo_34	2	DFLNT_nmol/mL	3-4 months	0.238193	0.288712	Higher in Case	0.0687693	Milk HMOs at 3-4m
milk_hmo_34	2	LNT_nmol/mL	3-4 months	-0.472087	-0.105422	Lower in Case	0.0497686	Milk HMOs at 3-4m
milk_hmo_34	2	Fuc_nmol/mL	3-4 months	0.165237	0.0963072	Higher in Case	0.0159135	Milk HMOs at 3-4m
milk_macro_micro_34	2	P	3-4 months	-0.587633	-0.163159	Lower in Case	0.0958776	Milk Macro- and Micronutrients at 3-4m
milk_macro_micro_34	2	Zn	3-4 months	-0.420547	-0.201775	Lower in Case	0.0848558	Milk Macro- and Micronutrients at 3-4m
milk_macro_micro_34	2	Ribo	3-4 months	0.354132	0.149901	Higher in Case	0.0530848	Milk Macro- and Micronutrients at 3-4m
milk_macro_micro_34	2	Nufa	3-4 months	0.330182	0.12854	Higher in Case	0.0424416	Milk Macro- and Micronutrients at 3-4m
milk_macro_micro_34	2	a.tocopherol	3-4 months	-0.175245	-0.0577756	Lower in Case	0.0101249	Milk Macro- and Micronutrients at 3-4m
milk_macro_micro_34	2	Kcal.L	3-4 months	-0.30228	-0.0250215	Lower in Case	0.0075635	Milk Macro- and Micronutrients at 3-4m
milk_macro_micro_34	2	FAT	3-4 months	-0.328037	-0.012268	Lower in Case	0.00402437	Milk Macro- and Micronutrients at 3-4m
milk_macro_micro_34	2	Cu	3-4 months	-0.111968	-0.0183706	Lower in Case	0.00205693	Milk Macro- and Micronutrients at 3-4m
milk_macro_micro_34	2	As	3-4 months	-0.0180315	-0.0225556	Lower in Case	0.000406713	Milk Macro- and Micronutrients at 3-4m
milk_macro_micro_34	2	B1	3-4 months	0.029057	0.00198704	Higher in Case	5.77376e-05	Milk Macro- and Micronutrients at 3-4m
milk_metabolome_34	2	rLC_neg_mtb_1582420	3-4 months	-0.366434	-0.18779	Lower in Case	0.0688127	Milk Metabolome at 3-4m	1139.4	0.11	negative	E2149	CE5153	3(S)-hydroxy-13cis-docosenoyl-CoA
milk_metabolome_34	2	rLC_neg_mtb_1581241	3-4 months	-0.268199	-0.238388	Lower in Case	0.0639355	Milk Metabolome at 3-4m	1056.35	132	negative
milk_metabolome_34	2	rLC_neg_mtb_4965023	3-4 months	-0.202632	-0.252239	Lower in Case	0.0511118	Milk Metabolome at 3-4m	479.297	364	negative
milk_metabolome_34	2	rLC_neg_mtb_1349349	3-4 months	0.187896	0.26015	Higher in Case	0.0488811	Milk Metabolome at 3-4m	790.246	103	negative
milk_metabolome_34	2	rLC_neg_mtb_1583692	3-4 months	-0.236139	-0.204146	Lower in Case	0.0482067	Milk Metabolome at 3-4m	1218.43	0.11	negative
milk_metabolome_34	2	rLC_neg_mtb_1565959	3-4 months	-0.277705	-0.151425	Lower in Case	0.0420515	Milk Metabolome at 3-4m	142.051	128	negative	E922;E2226;E3819	C00232;C06002;C00349;C00109;C00164;C04092;C00450;C00956	Succinate semialdehyde; Succinic semialdehyde; 4-Oxobutanoate$(S)-Methylmalonate semialdehyde$2-Methyl-3-oxopropanoate; 3-Oxo-2-methylpropanoate; Methylmalonate semialdehyde$2-Oxobutanoate$Acetoacetate;delta1-Piperideine-2-carboxylate; 1,2-Didehydropiperidine-2-carboxylate$2,3,4,5-Tetrahydropyridine-2-carboxylate; delta1-Piperideine-6-L-carboxylate;L-2-Aminoadipate; L-alpha-Aminoadipate; L-alpha-…
milk_metabolome_34	2	rLC_neg_mtb_1346707	3-4 months	-0.288154	-0.13685	Lower in Case	0.0394338	Milk Metabolome at 3-4m	646.688	105	negative
milk_metabolome_34	2	rLC_neg_mtb_1384159	3-4 months	-0.267791	-0.137298	Lower in Case	0.0367671	Milk Metabolome at 3-4m	1619.54	107	negative
milk_metabolome_34	2	rLC_neg_mtb_1349378	3-4 months	0.139207	0.245976	Higher in Case	0.0342417	Milk Metabolome at 3-4m	791.246	101	negative
milk_metabolome_34	2	rLC_neg_mtb_1482563	3-4 months	0.100249	0.330154	Higher in Case	0.0330975	Milk Metabolome at 3-4m	1631.56	105	negative
milk_metabolome_34	2	rLC_neg_mtb_5141953	3-4 months	0.0985971	0.317369	Higher in Case	0.0312917	Milk Metabolome at 3-4m	387.264	382	negative
milk_metabolome_34	2	rLC_neg_mtb_1374694	3-4 months	-0.214426	-0.141637	Lower in Case	0.0303706	Milk Metabolome at 3-4m	786.222	105	negative
milk_metabolome_34	2	rLC_neg_mtb_1756771	3-4 months	-0.149346	-0.174131	Lower in Case	0.0260058	Milk Metabolome at 3-4m	448.153	134	negative
milk_metabolome_34	2	rLC_neg_mtb_1270535	3-4 months	-0.207513	-0.12495	Lower in Case	0.0259288	Milk Metabolome at 3-4m	954.313	99	negative
milk_metabolome_34	2	rLC_neg_mtb_1377895	3-4 months	-0.174307	-0.148518	Lower in Case	0.0258878	Milk Metabolome at 3-4m	1091.35	101	negative
milk_metabolome_34	2	rLC_neg_mtb_1384177	3-4 months	-0.224523	-0.101409	Lower in Case	0.0227686	Milk Metabolome at 3-4m	1620.54	105	negative
milk_metabolome_34	2	rLC_pos_mtb_5305363	3-4 months	0.0757482	0.262183	Higher in Case	0.0198599	Milk Metabolome at 3-4m	516.417	355	positive
milk_metabolome_34	2	rLC_neg_mtb_1247181	3-4 months	0.0772086	0.247238	Higher in Case	0.0190889	Milk Metabolome at 3-4m	1145.4	93	negative	E299	C16387;CE4837;CE4855;tettet6coa;C16168	(2E,6Z,9Z,12Z,15Z,18Z)-Tetracosahexa-2,6,9,12,15,18-enoyl-CoA$tetracosa-9,12,15,18-all-cis-tetraenoyl-CoA$all-cis-12,15,18,21-tetracosatetraenoyl-CoA$tetracosatetraenoyl coenzyme A$(6Z,9Z,12Z,15Z,18Z,21Z)-Tetracosahexaenoyl-CoA
milk_metabolome_34	2	rLC_neg_mtb_5145348	3-4 months	-0.0610152	-0.300989	Lower in Case	0.0183649	Milk Metabolome at 3-4m	543.315	0.38	negative
milk_metabolome_34	2	rLC_neg_mtb_1619768	3-4 months	-0.213172	-0.0787565	Lower in Case	0.0167886	Milk Metabolome at 3-4m	202.072	112	negative	E11	C01074;C00645;C00140	N-Acetylgalactosamine; N-Acetylchondrosamine; 2-Acetamido-2-deoxygalactose; GalNAc$N-Acetyl-D-mannosamine; 2-Acetamido-2-deoxy-D-mannose$N-Acetyl-D-glucosamine
milk_metabolome_34	2	rLC_pos_mtb_939713	3-4 months	0.0619307	0.265845	Higher in Case	0.016464	Milk Metabolome at 3-4m	659.258	74	positive
milk_metabolome_34	2	rLC_neg_mtb_1377599	3-4 months	0.0474167	0.330215	Higher in Case	0.0156577	Milk Metabolome at 3-4m	1062.33	105	negative
milk_metabolome_34	2	rLC_neg_mtb_1377583	3-4 months	0.0467014	0.28594	Higher in Case	0.0133538	Milk Metabolome at 3-4m	1061.34	105	negative
milk_metabolome_34	2	rLC_neg_mtb_1408485	3-4 months	-0.0817798	-0.115457	Lower in Case	0.00944205	Milk Metabolome at 3-4m	1618.54	103	negative
milk_metabolome_34	2	rLC_neg_mtb_1546463	3-4 months	-0.0940481	-0.100395	Lower in Case	0.00944199	Milk Metabolome at 3-4m	629.212	116	negative
milk_metabolome_34	2	rLC_neg_mtb_1455388	3-4 months	0.0372316	0.248051	Higher in Case	0.00923531	Milk Metabolome at 3-4m	1545.52	99	negative
milk_metabolome_34	2	rLC_neg_mtb_1600458	3-4 months	-0.154496	-0.0560736	Lower in Case	0.00866313	Milk Metabolome at 3-4m	646.218	114	negative
milk_metabolome_34	2	rLC_neg_mtb_1687496	3-4 months	0.0344851	0.243062	Higher in Case	0.00838203	Milk Metabolome at 3-4m	1145.4	132	negative
milk_metabolome_34	2	rLC_neg_mtb_1592537	3-4 months	0.0364323	0.203358	Higher in Case	0.00740882	Milk Metabolome at 3-4m	172.829	126	negative
milk_metabolome_34	2	rLC_neg_mtb_1501313	3-4 months	-0.132789	-0.0546408	Lower in Case	0.00725572	Milk Metabolome at 3-4m	1057.35	107	negative
milk_metabolome_34	2	rLC_neg_mtb_6542198	3-4 months	-0.105927	-0.0677975	Lower in Case	0.00718159	Milk Metabolome at 3-4m	584.359	482	negative
milk_metabolome_34	2	rLC_neg_mtb_1607819	3-4 months	-0.057812	-0.117953	Lower in Case	0.00681912	Milk Metabolome at 3-4m	1055.38	0.11	negative
milk_metabolome_34	2	rLC_neg_mtb_1377564	3-4 months	0.0255929	0.262503	Higher in Case	0.00671821	Milk Metabolome at 3-4m	1060.33	101	negative	E353;E474	CE2248;hpdcacoa	3-hydroxyoctadecanoyl-CoA;heptadecanoyl coa
milk_metabolome_34	2	rLC_neg_mtb_1416608	3-4 months	0.0218817	0.293668	Higher in Case	0.00642595	Milk Metabolome at 3-4m	550.159	0.11	negative
milk_metabolome_34	2	rLC_neg_mtb_1613586	3-4 months	-0.126519	-0.0498524	Lower in Case	0.00630729	Milk Metabolome at 3-4m	1414.49	116	negative
milk_metabolome_34	2	rLC_neg_mtb_1374739	3-4 months	0.0287683	0.214974	Higher in Case	0.00618443	Milk Metabolome at 3-4m	790.747	101	negative
milk_metabolome_34	2	rLC_neg_mtb_1888671	3-4 months	-0.0405655	-0.130976	Lower in Case	0.00531311	Milk Metabolome at 3-4m	805.219	174	negative
milk_metabolome_34	2	rLC_neg_mtb_1965507	3-4 months	-0.109426	-0.0477389	Lower in Case	0.00522389	Milk Metabolome at 3-4m	1057.35	151	negative
milk_metabolome_34	2	rLC_neg_mtb_1278684	3-4 months	-0.0159807	-0.316877	Lower in Case	0.00506393	Milk Metabolome at 3-4m	1510.53	93	negative
milk_metabolome_34	2	rLC_neg_mtb_3214839	3-4 months	-0.0155936	-0.27427	Lower in Case	0.00427686	Milk Metabolome at 3-4m	158.989	246	negative
milk_metabolome_34	2	rLC_neg_mtb_4939674	3-4 months	-0.020812	-0.173341	Lower in Case	0.00360757	Milk Metabolome at 3-4m	515.317	362	negative
milk_metabolome_34	2	rLC_neg_mtb_2190000	3-4 months	0.0225173	0.138489	Higher in Case	0.0031184	Milk Metabolome at 3-4m	410.126	174	negative	E1894	CE6229	13E-tetranor-16-carboxy-LTE4
milk_metabolome_34	2	rLC_neg_mtb_3867386	3-4 months	-0.0174889	-0.140592	Lower in Case	0.0024588	Milk Metabolome at 3-4m	644.214	0.26	negative
milk_metabolome_34	2	rLC_neg_mtb_6388045	3-4 months	0.00835648	0.257473	Higher in Case	0.00215157	Milk Metabolome at 3-4m	607.396	469	negative
milk_metabolome_34	2	rLC_pos_mtb_2814763	3-4 months	0.00752433	0.239608	Higher in Case	0.00180289	Milk Metabolome at 3-4m	583.257	0.19	positive	E965	C00500	Biliverdin; Biliverdin IXalpha
milk_metabolome_34	2	rLC_neg_mtb_1613565	3-4 months	-0.0199858	-0.0849314	Lower in Case	0.00169742	Milk Metabolome at 3-4m	1413.49	116	negative
milk_metabolome_34	2	rLC_pos_mtb_1178738	3-4 months	-0.141205	0.0119921	Higher in Case	0.00169334	Milk Metabolome at 3-4m	610.196	93	positive
milk_metabolome_34	2	rLC_neg_mtb_1830550	3-4 months	-0.00344475	-0.218232	Lower in Case	0.000751753	Milk Metabolome at 3-4m	117.019	134	negative	E374;E915;E922;E931	C02170;C00042;C01620;C00232;C06002;C00349;C00109;C00164;C00546;C00511;CE0737	Methylmalonate; Methylmalonic acid$Succinate;;Succinate semialdehyde; Succinic semialdehyde; 4-Oxobutanoate$(S)-Methylmalonate semialdehyde$2-Methyl-3-oxopropanoate; 3-Oxo-2-methylpropanoate; Methylmalonate semialdehyde$2-Oxobutanoate$Acetoacetate;Methylglyoxal$Propenoate; Acrylic acid; Acrylate; 2-Propenoic acid; Vinylformic acid$malonic dialdehyde
milk_metabolome_34	2	rLC_neg_mtb_1377002	3-4 months	0.00223759	0.210917	Higher in Case	0.000471946	Milk Metabolome at 3-4m	1006.34	103	negative	E742	C07296;C00154	4,8,12-Trimethyltridecanoyl-CoA$Palmitoyl-CoA (n-C16:0CoA)
milk_metabolome_34	2	rLC_neg_mtb_1374567	3-4 months	-0.00853027	-0.0484292	Lower in Case	0.000413114	Milk Metabolome at 3-4m	770.216	101	negative
milk_targeted_34	2	TG.20.0_34.1.	3-4 months	-0.480797	-0.194182	Lower in Case	0.093362	Milk Targeted Metabolites at 3-4m
milk_targeted_34	2	TG.16.0_38.1.	3-4 months	-0.495903	-0.175802	Lower in Case	0.0871808	Milk Targeted Metabolites at 3-4m
milk_targeted_34	2	TG.18.0_32.0.	3-4 months	-0.261153	-0.242386	Lower in Case	0.0632998	Milk Targeted Metabolites at 3-4m
milk_targeted_34	2	His	3-4 months	-0.322147	-0.11058	Lower in Case	0.0356229	Milk Targeted Metabolites at 3-4m
milk_targeted_34	2	TG.18.2_36.3.	3-4 months	-0.213876	-0.156983	Lower in Case	0.0335749	Milk Targeted Metabolites at 3-4m
milk_targeted_34	2	TG.16.0_38.2.	3-4 months	-0.234234	-0.141147	Lower in Case	0.0330615	Milk Targeted Metabolites at 3-4m
milk_targeted_34	2	TG.17.2_38.5.	3-4 months	-0.154511	-0.210099	Lower in Case	0.0324626	Milk Targeted Metabolites at 3-4m
milk_targeted_34	2	TG.18.2_36.2.	3-4 months	-0.190551	-0.155996	Lower in Case	0.0297251	Milk Targeted Metabolites at 3-4m
milk_targeted_34	2	TG.17.2_38.6.	3-4 months	-0.184	-0.159907	Lower in Case	0.0294228	Milk Targeted Metabolites at 3-4m
milk_targeted_34	2	TG.17.0_36.3.	3-4 months	-0.169752	-0.154598	Lower in Case	0.0262433	Milk Targeted Metabolites at 3-4m
milk_targeted_34	2	TG.22.0_32.4.	3-4 months	-0.155706	-0.147317	Lower in Case	0.0229382	Milk Targeted Metabolites at 3-4m
milk_targeted_34	2	TG.18.1_36.3.	3-4 months	-0.13923	-0.14758	Lower in Case	0.0205476	Milk Targeted Metabolites at 3-4m
milk_targeted_34	2	TG.18.2_36.0.	3-4 months	-0.112862	-0.175151	Lower in Case	0.0197679	Milk Targeted Metabolites at 3-4m
milk_targeted_34	2	TG.18.0_34.2.	3-4 months	-0.0974949	-0.174831	Lower in Case	0.0170451	Milk Targeted Metabolites at 3-4m
milk_targeted_34	2	TG.18.0_36.4.	3-4 months	-0.115832	-0.142105	Lower in Case	0.0164603	Milk Targeted Metabolites at 3-4m
milk_targeted_34	2	TG.18.2_34.0.	3-4 months	-0.0879945	-0.171452	Lower in Case	0.0150869	Milk Targeted Metabolites at 3-4m
milk_targeted_34	2	TG.20.1_34.0.	3-4 months	-0.0871849	-0.157453	Lower in Case	0.0137276	Milk Targeted Metabolites at 3-4m
milk_targeted_34	2	TG.20.1_34.2.	3-4 months	-0.108486	-0.11196	Lower in Case	0.0121461	Milk Targeted Metabolites at 3-4m
milk_targeted_34	2	TG.18.2_35.1.	3-4 months	-0.073655	-0.130581	Lower in Case	0.00961795	Milk Targeted Metabolites at 3-4m
milk_targeted_34	2	TG.18.1_36.4.	3-4 months	-0.0787202	-0.121814	Lower in Case	0.00958926	Milk Targeted Metabolites at 3-4m
milk_targeted_34	2	TG.20.3_36.3.	3-4 months	-0.0506031	-0.107621	Lower in Case	0.00544593	Milk Targeted Metabolites at 3-4m
milk_targeted_34	2	PC.ae.C40.5	3-4 months	-0.0527676	-0.0980459	Lower in Case	0.00517364	Milk Targeted Metabolites at 3-4m
milk_targeted_34	2	TG.16.0_34.0.	3-4 months	-0.0238364	-0.205933	Lower in Case	0.00490869	Milk Targeted Metabolites at 3-4m
milk_targeted_34	2	TG.16.0_38.3.	3-4 months	-0.0533394	-0.0862988	Lower in Case	0.00460313	Milk Targeted Metabolites at 3-4m
milk_targeted_34	2	TG.18.2_36.1.	3-4 months	-0.0262471	-0.135082	Lower in Case	0.00354551	Milk Targeted Metabolites at 3-4m
milk_taxa_34	2	Actinomyces.graevenitzii	3-4 months	-0.264727	-0.227485	Lower in Case	0.0602215	Milk Microbiome at 3-4m
milk_taxa_34	2	Actinomyces.sp6	3-4 months	-0.277275	-0.153995	Lower in Case	0.0426989	Milk Microbiome at 3-4m
milk_taxa_34	2	Deinococcus_B.radiophilus.1	3-4 months	-0.195704	-0.154846	Lower in Case	0.030304	Milk Microbiome at 3-4m
milk_taxa_34	2	Actinomyces.sp1	3-4 months	-0.513976	-0.0564576	Lower in Case	0.0290179	Milk Microbiome at 3-4m
milk_taxa_34	2	Actinomyces.dentalis.3	3-4 months	-0.51373	-0.056301	Lower in Case	0.0289235	Milk Microbiome at 3-4m
milk_taxa_34	2	Brevundimonas.diminuta.1	3-4 months	-0.147853	-0.178173	Lower in Case	0.0263435	Milk Microbiome at 3-4m
milk_taxa_34	2	Neisseria_563205.sp5	3-4 months	-0.187656	-0.137639	Lower in Case	0.0258288	Milk Microbiome at 3-4m
milk_taxa_34	2	Pseudoglutamicibacter.cumminsii	3-4 months	-0.280051	-0.0905866	Lower in Case	0.0253689	Milk Microbiome at 3-4m
milk_taxa_34	2	Moraxella_A_651148.atlantae.12	3-4 months	-0.198041	-0.122199	Lower in Case	0.0242004	Milk Microbiome at 3-4m
milk_taxa_34	2	Lautropia.mirabilis	3-4 months	-0.145687	-0.1563	Lower in Case	0.0227709	Milk Microbiome at 3-4m
milk_taxa_34	2	Streptococcus.sp99	3-4 months	-0.105365	-0.204204	Lower in Case	0.0215159	Milk Microbiome at 3-4m
milk_taxa_34	2	Abiotrophia.defectiva	3-4 months	-0.195372	-0.102221	Lower in Case	0.019971	Milk Microbiome at 3-4m
milk_taxa_34	2	Granulicatella.sp10	3-4 months	-0.0927902	-0.186598	Lower in Case	0.0173145	Milk Microbiome at 3-4m
milk_taxa_34	2	Peptoniphilus_C.sp2	3-4 months	0.0606201	0.276913	Higher in Case	0.0167865	Milk Microbiome at 3-4m
milk_taxa_34	2	Corynebacterium.sp14	3-4 months	0.0670604	0.16608	Higher in Case	0.0111374	Milk Microbiome at 3-4m
milk_taxa_34	2	Prevotella.jejuni.1	3-4 months	-0.131922	-0.0825013	Lower in Case	0.0108837	Milk Microbiome at 3-4m
milk_taxa_34	2	Unclassified.Ardenticatenaceae.sp1	3-4 months	0.0352713	0.275384	Higher in Case	0.00971315	Milk Microbiome at 3-4m
milk_taxa_34	2	Microvirga.sp35	3-4 months	-0.0477661	-0.184133	Lower in Case	0.00879532	Milk Microbiome at 3-4m
milk_taxa_34	2	Limosilactobacillus.gastricus.2	3-4 months	0.0228882	0.32432	Higher in Case	0.0074231	Milk Microbiome at 3-4m
milk_taxa_34	2	Unclassified.Peptostreptococcaceae_256921.sp3	3-4 months	-0.0408017	-0.153803	Lower in Case	0.00627543	Milk Microbiome at 3-4m
milk_taxa_34	2	Veillonella_A.sp4	3-4 months	-0.0310731	-0.195559	Lower in Case	0.00607663	Milk Microbiome at 3-4m
milk_taxa_34	2	Geodermatophilus_A.obscurus	3-4 months	0.0192131	0.150462	Higher in Case	0.00289084	Milk Microbiome at 3-4m
milk_taxa_34	2	Corynebacterium.amycolatum_A	3-4 months	-0.0101381	-0.219989	Lower in Case	0.00223026	Milk Microbiome at 3-4m
milk_taxa_34	2	Mogibacterium.diversum	3-4 months	-0.00949105	0.0550743	Higher in Case	0.000522713	Milk Microbiome at 3-4m
milk_taxa_34	2	Pseudomonas_E_647464.sp14	3-4 months	0.000255621	0.299298	Higher in Case	7.65068e-05	Milk Microbiome at 3-4m

## Sheet: haz_mixed_models_later
comp	block	feature	score	n_obs	n_id	beta_feature	conf.low	conf.high	p_feature	beta_int	p_int	p_feature_fdr	p_int_fdr	block_label
1	maternal_taxa_56	Prevotella.sp900553155	0.170336	1205	141	-0.143636	-0.299447	0.0121754	0.0705054	0.0763308	0.662455	0.414732	0.916604	Maternal Fecal Microbiome (Taxa) at 5-6m
1	milk_macro_micro_34	TRP	0.133131	2338	279	-0.046697	-0.157352	0.0639578	0.406843	-0.321566	0.0149695	0.82891	0.254482	Milk Macro- and Micronutrients at 3-4m
1	maternal_gene_56	K06921	0.118789	1205	141	-0.0413611	-0.196556	0.113834	0.599112	-0.139863	0.445012	0.929941	0.916604	Maternal Fecal Metagenome (Genes) at 5-6m
1	milk_bioactive_34	Calprotectin	0.111664	2338	279	-0.0240485	-0.136512	0.088415	0.674126	-0.355249	0.192142	0.929941	0.691813	Milk Bioactive Proteins at 3-4m
1	maternal_gene_56	K06142	0.109962	1205	141	-0.0328301	-0.188766	0.123105	0.677885	0.055923	0.771245	0.929941	0.916604	Maternal Fecal Metagenome (Genes) at 5-6m
1	maternal_taxa_56	Unknown_Prevotella.6	0.100473	1205	141	-0.00405879	-0.163791	0.155673	0.960007	0.0726003	0.680969	0.97493	0.916604	Maternal Fecal Microbiome (Taxa) at 5-6m
1	milk_metabolome_34	rLC_neg_mtb_1218383	0.0848116	2338	279	0.0449787	-0.068442	0.158399	0.435675	0.00608096	0.961257	0.830289	0.96671	Milk Metabolome at 3-4m
1	maternal_prot_dep_56	A0A0B4J1U7	0.0797504	1205	141	0.0225423	-0.134663	0.179748	0.777224	-0.647031	0.0562152	0.933039	0.42569	Plasma Proteome (Depleted) at 5-6m
1	maternal_prot_nav_56	Q16610	0.0773879	1205	141	-0.118824	-0.272579	0.0349318	0.128807	-0.522357	0.00480077	0.486605	0.18351	Plasma Proteome (Naive) at 5-6m
1	milk_taxa_34	Bifidobacterium_388775.sp27	0.0722856	1603	192	-0.0503511	-0.190301	0.0895993	0.478798	0.0437669	0.760988	0.830289	0.916604	Milk Microbiome at 3-4m
1	maternal_prot_nav_56	P01706	0.0624837	1205	141	-0.054887	-0.208169	0.0983953	0.480183	0.295306	0.141479	0.830289	0.674843	Plasma Proteome (Naive) at 5-6m
1	milk_taxa_34	Nocardiopsis_A_393323.salina	0.0587486	1603	192	0.00295346	-0.140996	0.146903	0.967761	0.21099	0.148862	0.97493	0.674843	Milk Microbiome at 3-4m
1	maternal_vams_56	vam_1005022	0.0563869	2324	274	-0.0575968	-0.170277	0.0550839	0.315167	-0.224964	0.0801849	0.769491	0.474137	Maternal VAMS at 5-6m
1	maternal_taxa_56	Anaerovibrio.sp900548165	0.0552805	1205	141	0.00458795	-0.150266	0.159442	0.953376	0.320067	0.0592121	0.97493	0.42569	Maternal Fecal Microbiome (Taxa) at 5-6m
1	maternal_gene_56	K07133	0.0547952	1205	141	0.0261049	-0.129121	0.181331	0.74003	-0.0932564	0.605264	0.933039	0.916604	Maternal Fecal Metagenome (Genes) at 5-6m
1	maternal_taxa_56	Prevotella.sp900548745	0.0524357	1205	141	-0.0945161	-0.24974	0.060708	0.230701	0.190185	0.289018	0.629593	0.86467	Maternal Fecal Microbiome (Taxa) at 5-6m
1	maternal_prot_dep_56	Q99487	0.0493865	1205	141	0.0196456	-0.138663	0.177954	0.806555	-0.527065	0.0244064	0.937534	0.296669	Plasma Proteome (Depleted) at 5-6m
1	maternal_gene_56	K02014	0.0463934	1205	141	-0.139642	-0.293654	0.0143704	0.0752018	-0.0876919	0.630377	0.414732	0.916604	Maternal Fecal Metagenome (Genes) at 5-6m
1	maternal_vams_56	vam_1020529	0.046328	2324	274	-0.0062514	-0.119624	0.107121	0.913636	-0.0531374	0.680826	0.970739	0.916604	Maternal VAMS at 5-6m
1	maternal_prot_dep_56	Q7Z2W4	0.0460003	1205	141	0.0470777	-0.110408	0.204563	0.555482	-0.621139	0.00191848	0.921288	0.139608	Plasma Proteome (Depleted) at 5-6m
1	milk_taxa_34	Peribacillus_301373.sp1	0.0457593	1603	192	0.0711936	-0.064522	0.206909	0.302132	0.116665	0.439795	0.760924	0.916604	Milk Microbiome at 3-4m
1	maternal_vams_56	vam_1006116	0.0448508	2324	274	-0.00982162	-0.122224	0.10258	0.863548	-0.290133	0.0247583	0.951878	0.296669	Maternal VAMS at 5-6m
1	infant_vams_34	vam_1023809	0.0445115	2368	282	-0.0565352	-0.167517	0.0544461	0.316849	-0.0584591	0.639136	0.769491	0.916604	Infant VAMS at 3-4m
1	maternal_prot_dep_56	P23975	0.0429548	1205	141	0.00881988	-0.14958	0.16722	0.912503	-0.386496	0.0594713	0.970739	0.42569	Plasma Proteome (Depleted) at 5-6m
1	milk_taxa_34	Paracoccus.sp27	0.0407579	1603	192	0.0205208	-0.120442	0.161483	0.774317	-0.214357	0.181324	0.933039	0.691813	Milk Microbiome at 3-4m
1	milk_metabolome_34	rLC_neg_mtb_7475795	0.0399947	2338	279	0.105438	-0.00556013	0.216437	0.0625452	0.222677	0.0719078	0.414732	0.454255	Milk Metabolome at 3-4m
1	maternal_prot_nav_56	Q4KWH8	0.0398247	1205	141	-0.0951561	-0.249308	0.058996	0.224375	-0.144075	0.542501	0.629593	0.916604	Plasma Proteome (Naive) at 5-6m
1	maternal_prot_dep_56	P33316	0.038708	1205	141	0.0322726	-0.123183	0.187728	0.682127	0.052874	0.800997	0.929941	0.916604	Plasma Proteome (Depleted) at 5-6m
1	milk_targeted_34	FA.12.0.	0.0385455	2338	279	0.0410148	-0.070391	0.152421	0.469232	-0.0662287	0.598554	0.830289	0.916604	Milk Targeted Metabolites at 3-4m
1	milk_macro_micro_34	CARBOHYDRATE	0.0382666	2329	278	0.0395969	-0.073154	0.152348	0.489934	0.00530514	0.96671	0.832888	0.96671	Milk Macro- and Micronutrients at 3-4m
1	maternal_vams_56	vam_1040948	0.0376616	2324	274	0.0296411	-0.0828373	0.142119	0.604323	0.1717	0.238787	0.929941	0.795659	Maternal VAMS at 5-6m
1	maternal_vams_56	vam_1000764	0.0368401	2324	274	-0.0494335	-0.162618	0.0637512	0.390642	-0.076935	0.567733	0.82891	0.916604	Maternal VAMS at 5-6m
1	infant_vams_34	vam_2005727	0.0351438	2368	282	0.0601804	-0.0503029	0.170664	0.284548	0.095297	0.442318	0.744204	0.916604	Infant VAMS at 3-4m
1	milk_metabolome_34	rLC_neg_mtb_3646835	0.0345391	2338	279	-0.024993	-0.136185	0.086199	0.658495	-0.160126	0.191074	0.929941	0.691813	Milk Metabolome at 3-4m
1	maternal_taxa_56	Treponema_D.succinifaciens	0.0338813	1205	141	-0.118478	-0.273367	0.0364118	0.132725	-0.0503227	0.768453	0.487853	0.916604	Maternal Fecal Microbiome (Taxa) at 5-6m
1	infant_vams_34	vam_1012585	0.0334014	2368	282	0.054613	-0.056249	0.165475	0.333035	0.345662	0.00610032	0.78091	0.18351	Infant VAMS at 3-4m
1	milk_targeted_34	Thr	0.0323982	2338	279	-0.0905674	-0.200691	0.0195564	0.106594	-0.217711	0.07225	0.483182	0.454255	Milk Targeted Metabolites at 3-4m
1	maternal_prot_nav_56	Q9P2S6	0.0323604	1205	141	-0.142548	-0.299028	0.0139308	0.0738508	-0.434958	0.00674669	0.414732	0.18351	Plasma Proteome (Naive) at 5-6m
1	milk_targeted_34	DG.14.0_18.1.	0.0304727	2338	279	-0.00248756	-0.113425	0.108449	0.964825	-0.0243023	0.845415	0.97493	0.919811	Milk Targeted Metabolites at 3-4m
1	maternal_prot_nav_56	A0A0C4DH38	0.029736	1205	141	-0.0962247	-0.254516	0.0620666	0.231468	-0.0771685	0.631067	0.629593	0.916604	Plasma Proteome (Naive) at 5-6m
1	milk_macro_micro_34	B6	0.0285439	2338	279	-0.0403693	-0.151222	0.0704838	0.474055	-0.0812415	0.502501	0.830289	0.916604	Milk Macro- and Micronutrients at 3-4m
1	infant_vams_34	vam_2003606	0.0275742	2368	282	0.074514	-0.0355827	0.184611	0.18386	-0.14831	0.333829	0.60292	0.916604	Infant VAMS at 3-4m
1	infant_gene_56	K00088	0.0272506	971	113	-0.154363	-0.317436	0.00870981	0.0633241	0.0932757	0.676898	0.414732	0.916604	Infant Fecal Metagenome (Genes) at 5-6m
1	infant_gene_56	K01776	0.0266348	971	113	-0.182877	-0.346171	-0.0195827	0.0285006	0.0823837	0.686516	0.414732	0.916604	Infant Fecal Metagenome (Genes) at 5-6m
1	milk_taxa_34	Azorhizobium.caulinodans	0.0262351	1603	192	0.0311071	-0.109571	0.171785	0.66322	0.293219	0.0973479	0.929941	0.551638	Milk Microbiome at 3-4m
1	milk_metabolome_34	rLC_pos_mtb_622433	0.0261915	2338	279	-0.0200663	-0.131786	0.0916538	0.723929	-0.251587	0.045388	0.929941	0.42569	Milk Metabolome at 3-4m
1	milk_macro_micro_34	PL	0.0260491	2338	279	-0.036523	-0.147433	0.0743867	0.517366	-0.0684715	0.571946	0.868664	0.916604	Milk Macro- and Micronutrients at 3-4m
1	maternal_gene_56	GH23_0	0.0246907	1205	141	0.000542252	-0.155276	0.156361	0.99452	0.0432685	0.804079	0.99452	0.916604	Maternal Fecal Metagenome (Genes) at 5-6m
1	infant_gene_56	K02111	0.0246567	971	113	-0.160591	-0.323838	0.00265643	0.0537811	0.0180638	0.931777	0.414732	0.96671	Infant Fecal Metagenome (Genes) at 5-6m
1	infant_vams_34	vam_1025616	0.0239454	2368	282	0.0499023	-0.0610234	0.160828	0.376621	0.1235	0.274056	0.82891	0.859672	Infant VAMS at 3-4m
1	infant_gene_56	K02982	0.0238287	971	113	-0.146568	-0.310546	0.0174109	0.0792869	0.0376361	0.861477	0.414732	0.922527	Infant Fecal Metagenome (Genes) at 5-6m
1	milk_targeted_34	AA	0.0233272	2338	279	0.00469255	-0.107334	0.116719	0.934343	-0.0820654	0.481012	0.97493	0.916604	Milk Targeted Metabolites at 3-4m
1	milk_metabolome_34	rLC_pos_mtb_5718445	0.023162	2338	279	-0.00792661	-0.119169	0.103316	0.888551	-0.0139799	0.907996	0.966744	0.949904	Milk Metabolome at 3-4m
1	milk_targeted_34	DG.16.1_18.0.	0.0226313	2338	279	-0.051409	-0.16422	0.0614024	0.370455	-0.189184	0.178215	0.82891	0.691813	Milk Targeted Metabolites at 3-4m
1	infant_gene_56	K00075	0.0206824	971	113	-0.162947	-0.326222	0.000327231	0.0504532	0.167488	0.429769	0.414732	0.916604	Infant Fecal Metagenome (Genes) at 5-6m
1	milk_macro_micro_34	Mg	0.0179228	2314	276	0.049375	-0.062717	0.161467	0.386618	0.0620729	0.619676	0.82891	0.916604	Milk Macro- and Micronutrients at 3-4m
1	milk_bioactive_34	FGF-21	0.0135961	2338	279	-0.027213	-0.139252	0.0848263	0.632934	-0.267974	0.0518303	0.929941	0.42569	Milk Bioactive Proteins at 3-4m
1	milk_hmo_34	Sia_nmol/mL	0.011136	2338	279	-0.050114	-0.162116	0.0618878	0.379189	-0.0836175	0.483139	0.82891	0.916604	Milk HMOs at 3-4m
1	milk_hmo_34	LSTc_nmol/mL	0.00882896	2338	279	-0.0869275	-0.198155	0.0242995	0.125071	-0.0928217	0.415639	0.485992	0.916604	Milk HMOs at 3-4m
1	infant_taxa_56	Methanobrevibacter_A.smithii	0.00549829	971	113	0.159412	-0.00467121	0.323495	0.0567712	-0.0650911	0.747924	0.414732	0.916604	Infant Fecal Microbiome (Taxa) at 5-6m
1	infant_taxa_56	Methanosphaera.stadtmanae	0.00549829	971	113	0.159412	-0.00467121	0.323495	0.0567712	-0.0650911	0.747924	0.414732	0.916604	Infant Fecal Microbiome (Taxa) at 5-6m
1	infant_taxa_56	MX.02.sp006954405	0.00549829	971	113	0.159412	-0.00467121	0.323495	0.0567712	-0.0650911	0.747924	0.414732	0.916604	Infant Fecal Microbiome (Taxa) at 5-6m
1	infant_taxa_56	Methanomethylophilus.alvus	0.00549829	971	113	0.159412	-0.00467121	0.323495	0.0567712	-0.0650911	0.747924	0.414732	0.916604	Infant Fecal Microbiome (Taxa) at 5-6m
1	infant_taxa_56	UBA71.sp006954465	0.00549829	971	113	0.159412	-0.00467121	0.323495	0.0567712	-0.0650911	0.747924	0.414732	0.916604	Infant Fecal Microbiome (Taxa) at 5-6m
1	milk_hmo_34	DSLNT_nmol/mL	0.00350566	2338	279	-0.0483993	-0.161175	0.0643765	0.398937	0.0632801	0.587655	0.82891	0.916604	Milk HMOs at 3-4m
1	milk_hmo_34	3'SL_nmol/mL	0.00187828	2338	279	-0.0220319	-0.135121	0.0910571	0.701637	-0.0543375	0.642698	0.929941	0.916604	Milk HMOs at 3-4m
1	milk_hmo_34	SUM_nmol/mL	0.000802009	2338	279	0.0289769	-0.0827944	0.140748	0.610217	0.0414512	0.732195	0.929941	0.916604	Milk HMOs at 3-4m
1	milk_bioactive_34	IgA	0.000599956	2338	279	-0.112773	-0.227411	0.00186521	0.0538191	-0.373269	0.604599	0.414732	0.916604	Milk Bioactive Proteins at 3-4m
2	milk_hmo_34	FLNH_nmol/mL	0.125837	2338	279	-0.0226017	-0.135579	0.0903761	0.694022	0.101662	0.485487	0.929941	0.916604	Milk HMOs at 3-4m
2	maternal_taxa_56	UBA737.sp002431945	0.103562	1205	141	0.0211887	-0.137129	0.179506	0.791714	0.0926861	0.684285	0.933039	0.916604	Maternal Fecal Microbiome (Taxa) at 5-6m
2	infant_vams_34	vam_2005999	0.102675	2368	282	0.107315	-0.00383219	0.218463	0.0583813	-0.0762871	0.50147	0.414732	0.916604	Infant VAMS at 3-4m
2	maternal_prot_nav_56	P10643	0.101347	1205	141	0.00768747	-0.151502	0.166877	0.924078	-0.46663	0.0248365	0.974221	0.296669	Plasma Proteome (Naive) at 5-6m
2	maternal_vams_56	vam_1001290	0.096562	2324	274	0.0319745	-0.0815464	0.145495	0.579691	-0.0401609	0.756677	0.929941	0.916604	Maternal VAMS at 5-6m
2	milk_macro_micro_34	P	0.0958776	2314	276	-0.0604174	-0.17053	0.0496951	0.281025	0.0362653	0.779826	0.744204	0.916604	Milk Macro- and Micronutrients at 3-4m
2	milk_targeted_34	TG.20.0_34.1.	0.093362	2338	279	-0.0688189	-0.180703	0.043065	0.226991	-0.0549527	0.66641	0.629593	0.916604	Milk Targeted Metabolites at 3-4m
2	infant_vams_34	vam_2022966	0.0915235	2368	282	0.042529	-0.0683904	0.153448	0.451037	-0.061181	0.629812	0.830289	0.916604	Infant VAMS at 3-4m
2	maternal_prot_nav_56	Q9UK99	0.0879917	1205	141	0.0380771	-0.118036	0.19419	0.630419	-0.0660803	0.708589	0.929941	0.916604	Plasma Proteome (Naive) at 5-6m
2	infant_gene_56	GH18_0	0.0873088	971	113	-0.125532	-0.293157	0.0420933	0.14068	0.425317	0.121885	0.493026	0.656372	Infant Fecal Metagenome (Genes) at 5-6m
2	milk_targeted_34	TG.16.0_38.1.	0.0871808	2338	279	-0.0400873	-0.15225	0.0720758	0.4823	-0.0976217	0.454513	0.830289	0.916604	Milk Targeted Metabolites at 3-4m
2	milk_macro_micro_34	Zn	0.0848558	2314	276	-0.0936338	-0.204314	0.0170462	0.0969669	0.0371324	0.762413	0.459838	0.916604	Milk Macro- and Micronutrients at 3-4m
2	milk_hmo_34	Secretor	0.0743734	2338	279	0.0891743	-0.0214504	0.199799	0.11369	0.180139	0.166064	0.483182	0.691813	Milk HMOs at 3-4m
2	maternal_vams_56	vam_2010243	0.0727769	2324	274	-0.0228925	-0.135503	0.0897182	0.689316	0.0499952	0.68673	0.929941	0.916604	Maternal VAMS at 5-6m
2	maternal_taxa_56	Unknown_CAG.110.13	0.0705231	1205	141	-0.0291471	-0.186507	0.128213	0.71478	0.103253	0.575753	0.929941	0.916604	Maternal Fecal Microbiome (Taxa) at 5-6m
2	maternal_taxa_56	Unknown_Lachnospiraceae.7	0.0693339	1205	141	0.00480159	-0.150517	0.16012	0.951354	-0.185591	0.367406	0.97493	0.916604	Maternal Fecal Microbiome (Taxa) at 5-6m
2	milk_metabolome_34	rLC_neg_mtb_1582420	0.0688127	2338	279	-0.0214814	-0.133815	0.0908523	0.70688	0.145424	0.434912	0.929941	0.916604	Milk Metabolome at 3-4m
2	milk_hmo_34	DFLNT_nmol/mL	0.0687693	2338	279	-0.0733671	-0.185308	0.0385741	0.198058	0.00785882	0.947666	0.61218	0.96671	Milk HMOs at 3-4m
2	maternal_taxa_56	Unknown_CAG.110.26	0.0674986	1205	141	0.0649345	-0.0898674	0.219736	0.40836	-0.0474539	0.803403	0.82891	0.916604	Maternal Fecal Microbiome (Taxa) at 5-6m
2	milk_metabolome_34	rLC_neg_mtb_1581241	0.0639355	2338	279	-0.0100302	-0.122141	0.10208	0.86033	-0.0273092	0.832611	0.951878	0.917644	Milk Metabolome at 3-4m
2	maternal_taxa_56	Unknown_Faecalibacterium.3	0.0633231	1205	141	-0.284411	-0.432575	-0.136246	0.000218667	-0.226231	0.193301	0.0297387	0.691813	Maternal Fecal Microbiome (Taxa) at 5-6m
2	milk_targeted_34	TG.18.0_32.0.	0.0632998	2338	279	-0.0237434	-0.136328	0.0888417	0.678356	-0.177912	0.160894	0.929941	0.691813	Milk Targeted Metabolites at 3-4m
2	infant_gene_56	3003835	0.0621844	971	113	-0.0241857	-0.190603	0.142232	0.773931	0.200727	0.444292	0.933039	0.916604	Infant Fecal Metagenome (Genes) at 5-6m
2	milk_bioactive_34	LH	0.0613049	2338	279	0.045813	-0.066531	0.158157	0.422805	-0.025867	0.836675	0.830289	0.917644	Milk Bioactive Proteins at 3-4m
2	maternal_gene_56	GH39_0	0.0607474	1205	141	0.136783	-0.0160049	0.28957	0.0789152	-0.121806	0.472692	0.414732	0.916604	Maternal Fecal Metagenome (Genes) at 5-6m
2	milk_taxa_34	Actinomyces.graevenitzii	0.0602215	1603	192	-0.00798959	-0.147382	0.131403	0.910107	0.136337	0.430639	0.970739	0.916604	Milk Microbiome at 3-4m
2	milk_macro_micro_34	Ribo	0.0530848	2338	279	0.0149104	-0.0969281	0.126749	0.793173	-0.133986	0.239868	0.933039	0.795659	Milk Macro- and Micronutrients at 3-4m
2	maternal_vams_56	vam_1011823	0.052066	2324	274	-0.0409612	-0.154988	0.0730652	0.480043	0.0400548	0.789894	0.830289	0.916604	Maternal VAMS at 5-6m
2	milk_metabolome_34	rLC_neg_mtb_4965023	0.0511118	2338	279	-0.104752	-0.215583	0.00607766	0.063859	-0.416471	0.00205306	0.414732	0.139608	Milk Metabolome at 3-4m
2	infant_taxa_56	Bacteroides.thetaiotaomicron	0.0504295	971	113	-0.128809	-0.292281	0.0346634	0.121304	0.0475784	0.858794	0.485992	0.922527	Infant Fecal Microbiome (Taxa) at 5-6m
2	maternal_vams_56	vam_2003937	0.0502383	2324	274	0.0593186	-0.0532007	0.171838	0.300253	0.0559965	0.668431	0.760924	0.916604	Maternal VAMS at 5-6m
2	milk_hmo_34	LNT_nmol/mL	0.0497686	2338	279	-0.0754824	-0.187609	0.0366443	0.186196	-0.0761966	0.563417	0.60292	0.916604	Milk HMOs at 3-4m
2	maternal_gene_56	CBM9_0	0.049041	1205	141	0.124718	-0.0289312	0.278368	0.1108	-0.172386	0.292462	0.483182	0.86467	Maternal Fecal Metagenome (Genes) at 5-6m
2	milk_metabolome_34	rLC_neg_mtb_1349349	0.0488811	2338	279	-0.0875315	-0.199235	0.024172	0.124078	0.00738612	0.953765	0.485992	0.96671	Milk Metabolome at 3-4m
2	maternal_vams_56	vam_1008981	0.0484222	2324	274	-0.0533455	-0.167883	0.061192	0.359997	-0.0355845	0.812377	0.82891	0.916604	Maternal VAMS at 5-6m
2	milk_metabolome_34	rLC_neg_mtb_1583692	0.0482067	2338	279	0.0214075	-0.091434	0.134249	0.709095	0.136177	0.368739	0.929941	0.916604	Milk Metabolome at 3-4m
2	maternal_prot_nav_56	O75882	0.0468281	1205	141	0.134034	-0.0197243	0.287792	0.0870213	-0.112619	0.52851	0.438329	0.916604	Plasma Proteome (Naive) at 5-6m
2	infant_gene_56	3000833	0.0445956	971	113	-0.107735	-0.274487	0.0590175	0.203173	0.351513	0.267029	0.614034	0.859672	Infant Fecal Metagenome (Genes) at 5-6m
2	maternal_prot_nav_56	P48740	0.0434753	1205	141	-0.17359	-0.326624	-0.0205556	0.0264914	-0.202937	0.278129	0.414732	0.859672	Plasma Proteome (Naive) at 5-6m
2	infant_gene_56	3005008	0.0433472	971	113	-0.139341	-0.304828	0.0261464	0.0980537	-0.198723	0.536142	0.459838	0.916604	Infant Fecal Metagenome (Genes) at 5-6m
2	milk_taxa_34	Actinomyces.sp6	0.0426989	1603	192	-0.0985748	-0.233355	0.0362053	0.150779	-0.105424	0.456918	0.51265	0.916604	Milk Microbiome at 3-4m
2	milk_macro_micro_34	Nufa	0.0424416	2338	279	0.0748018	-0.0377263	0.18733	0.191764	-0.0667683	0.563005	0.60651	0.916604	Milk Macro- and Micronutrients at 3-4m
2	infant_vams_34	vam_2024111	0.0409888	2368	282	-0.0216039	-0.13237	0.0891619	0.701326	-0.0162152	0.897247	0.929941	0.946612	Infant VAMS at 3-4m
2	maternal_prot_nav_56	A0A0J9YXX1	0.0394982	1205	141	-0.0248174	-0.180118	0.130483	0.752533	0.127375	0.432383	0.933039	0.916604	Plasma Proteome (Naive) at 5-6m
2	infant_vams_34	vam_2023221	0.0389065	2368	282	-0.0114472	-0.121977	0.0990822	0.838608	0.0288287	0.815508	0.951878	0.916604	Infant VAMS at 3-4m
2	infant_gene_56	K22854	0.0386619	971	113	-0.149155	-0.314495	0.0161846	0.0765787	0.13614	0.63173	0.414732	0.916604	Infant Fecal Metagenome (Genes) at 5-6m
2	infant_taxa_56	Bacteroides.fragilis_A	0.0365342	971	113	-0.120812	-0.28242	0.0407967	0.141382	0.0827457	0.704846	0.493026	0.916604	Infant Fecal Microbiome (Taxa) at 5-6m
2	milk_targeted_34	His	0.0356229	2338	279	-0.00968521	-0.121313	0.101943	0.86451	-0.315423	0.0124249	0.951878	0.241397	Milk Targeted Metabolites at 3-4m
2	infant_taxa_56	Pauljensenia.sp900541895	0.0352605	971	113	-0.0304209	-0.196214	0.135372	0.716897	-0.462733	0.0114488	0.929941	0.241397	Infant Fecal Microbiome (Taxa) at 5-6m
2	milk_targeted_34	TG.18.2_36.3.	0.0335749	2338	279	-0.109758	-0.220655	0.00113901	0.0523834	-0.058506	0.632779	0.414732	0.916604	Milk Targeted Metabolites at 3-4m
2	infant_vams_34	vam_2002668	0.0305155	2368	282	-0.00976708	-0.121079	0.101545	0.862996	0.242521	0.0567623	0.951878	0.42569	Infant VAMS at 3-4m
2	milk_taxa_34	Deinococcus_B.radiophilus.1	0.030304	1603	192	0.0233308	-0.107185	0.153846	0.724807	-0.0467283	0.780431	0.929941	0.916604	Milk Microbiome at 3-4m
2	maternal_prot_dep_56	P55201	0.0294798	1205	141	0.0132851	-0.144323	0.170893	0.867889	0.381645	0.23452	0.951878	0.795659	Plasma Proteome (Depleted) at 5-6m
2	milk_taxa_34	Actinomyces.sp1	0.0290179	1603	192	-0.0189486	-0.162781	0.124884	0.795256	1.86852	0.146651	0.933039	0.674843	Milk Microbiome at 3-4m
2	infant_taxa_56	Bacteroides.ovatus	0.02897	971	113	-0.0826038	-0.248629	0.0834215	0.326383	0.482344	0.125483	0.778739	0.656372	Infant Fecal Microbiome (Taxa) at 5-6m
2	milk_taxa_34	Actinomyces.dentalis.3	0.0289235	1603	192	-0.0188942	-0.162725	0.124936	0.795828	1.84816	0.146602	0.933039	0.674843	Milk Microbiome at 3-4m
2	infant_taxa_56	Flavonifractor.plautii	0.0283409	971	113	0.0991457	-0.0624941	0.260785	0.22683	-0.0876757	0.685495	0.629593	0.916604	Infant Fecal Microbiome (Taxa) at 5-6m
2	maternal_prot_dep_56	A0A0C4DH29	0.0231603	1205	141	-0.0311827	-0.189453	0.127087	0.697487	0.235789	0.6324	0.929941	0.916604	Plasma Proteome (Depleted) at 5-6m
2	milk_bioactive_34	Insulin	0.0212266	2338	279	0.0428787	-0.0687555	0.154513	0.450225	0.29838	0.0261767	0.830289	0.296669	Milk Bioactive Proteins at 3-4m
2	maternal_prot_dep_56	P52209	0.0210218	1205	141	-0.0236177	-0.182319	0.135084	0.769028	1.68734	0.0519709	0.933039	0.42569	Plasma Proteome (Depleted) at 5-6m
2	maternal_prot_dep_56	A8MT70	0.0198663	1205	141	-0.0608223	-0.218797	0.097152	0.447831	-0.0610878	0.897889	0.830289	0.946612	Plasma Proteome (Depleted) at 5-6m
2	maternal_prot_dep_56	P00558	0.0182038	1205	141	-0.0149451	-0.173536	0.143646	0.852474	1.39642	0.0734824	0.951878	0.454255	Plasma Proteome (Depleted) at 5-6m
2	milk_hmo_34	Fuc_nmol/mL	0.0159135	2338	279	0.0435137	-0.06825	0.155277	0.444079	0.0670728	0.581935	0.830289	0.916604	Milk HMOs at 3-4m
2	maternal_gene_56	GH38_0	0.0146199	1205	141	0.141685	-0.011025	0.294394	0.0687319	-0.0471345	0.771639	0.414732	0.916604	Maternal Fecal Metagenome (Genes) at 5-6m
2	maternal_gene_56	K01552	0.0106343	1205	141	0.172386	0.0199689	0.324802	0.0269267	-0.102533	0.528962	0.414732	0.916604	Maternal Fecal Metagenome (Genes) at 5-6m
2	milk_macro_micro_34	a.tocopherol	0.0101249	2356	281	-0.109491	-0.220909	0.00192693	0.0540678	-0.00883803	0.94078	0.414732	0.96671	Milk Macro- and Micronutrients at 3-4m
2	maternal_gene_56	K02124	0.00859961	1205	141	0.209996	0.0583894	0.361602	0.00697249	-0.0367497	0.822427	0.414732	0.916804	Maternal Fecal Metagenome (Genes) at 5-6m
2	milk_bioactive_34	Calprotectin	0.00494926	2338	279	-0.0240485	-0.136512	0.088415	0.674126	-0.355249	0.192142	0.929941	0.691813	Milk Bioactive Proteins at 3-4m

## Sheet: mediation_glutamine_serine
outcome	mediator	n	a_svn_to_mediator	a_p	b_mediator_to_outcome	b_p	direct	direct_low	direct_high	direct_p	indirect	indirect_low	indirect_high	indirect_p	total	total_low	total_high	total_p	prop_mediated	prop_low	prop_high	prop_p	indirect_FDR	prop_FDR	domain	month	indirect_sig	prop_percent	prop_label
c_haz6	Glutamine	222	-0.379511	0.00861574	0.210443	0.000589271	-0.717491	-1.01924	-0.418635	2.32271e-06	-0.0798654	-0.175355	-0.0136437	0.0520154	-0.797357	-1.11252	-0.48928	5.60139e-07	0.100163	0.0193575	0.220227	0.0523614	0.381211	0.415362	LAZ	6	TRUE	10.0163	0.1
c_haz5	Glutamine	259	-0.322259	0.0184069	0.130997	0.0276465	-0.925947	-1.20029	-0.643809	6.08431e-11	-0.0422149	-0.111781	-0.000623014	0.156624	-0.968161	-1.241	-0.691373	3.73168e-12	0.0436032	0.000667781	0.120896	0.174982	0.381211	0.415362	LAZ	5	TRUE	4.36032	0.04
c_haz1	Glutamine	272	-0.264952	0.0442829	0.151851	0.0130527	-1.04527	-1.31204	-0.777533	1.66533e-14	-0.0402333	-0.111678	0.000380769	0.176225	-1.0855	-1.34561	-0.821123	4.44089e-16	0.0370642	-0.000329715	0.107799	0.187792	0.381211	0.415362	LAZ	1	FALSE	3.70642
c_haz2	Glutamine	268	-0.25565	0.0584291	0.115307	0.0562444	-0.885976	-1.1458	-0.62379	3.63694e-11	-0.0294783	-0.0923396	0.00275216	0.244256	-0.915455	-1.17701	-0.660755	3.56493e-12	0.0322007	-0.00303068	0.104106	0.266419	0.381211	0.415362	LAZ	2	FALSE	3.22007
c_haz4	Glutamine	268	-0.298278	0.0267436	0.101253	0.10476	-0.947098	-1.22984	-0.686576	1.37179e-11	-0.0302017	-0.0934406	0.00479602	0.244644	-0.9773	-1.25785	-0.72316	1.67333e-12	0.0309032	-0.00492229	0.100704	0.262161	0.381211	0.415362	LAZ	4	FALSE	3.09032
c_haz3	Glutamine	269	-0.295834	0.0267326	0.0892999	0.156556	-1.01336	-1.28759	-0.746119	1.01918e-13	-0.0264179	-0.0909727	0.00761532	0.296361	-1.03978	-1.31015	-0.783638	1.02141e-14	0.0254073	-0.0072703	0.0885863	0.308328	0.381211	0.415362	LAZ	3	FALSE	2.54073
c_haz7	Glutamine	204	-0.350705	0.0226937	0.1021	0.185113	-0.831345	-1.1377	-0.508143	2.17871e-07	-0.0358069	-0.11833	0.0132811	0.296498	-0.867152	-1.16987	-0.556221	4.9478e-08	0.0412925	-0.0158076	0.141681	0.323059	0.381211	0.415362	LAZ	7	FALSE	4.12925
c_haz11	Glutamine	255	-0.329704	0.0146609	0.076191	0.228348	-0.590199	-0.877593	-0.297084	8.19686e-05	-0.0251205	-0.0927125	0.012352	0.340304	-0.615319	-0.903828	-0.322824	4.09722e-05	0.0408251	-0.0221406	0.159184	0.385226	0.382842	0.433379	LAZ	11	FALSE	4.08251
c_haz9	Glutamine	156	-0.0889568	0.649369	0.113311	0.182783	-0.901328	-1.26851	-0.549021	6.47484e-07	-0.0100798	-0.0813825	0.0379873	0.725808	-0.911408	-1.28524	-0.550172	8.10721e-07	0.0110596	-0.0469123	0.0887764	0.729893	0.725808	0.729893	LAZ	9	FALSE	1.10596
c_waz6	Glutamine	222	-0.379511	0.00861574	0.138929	0.0294688	-0.737275	-1.0406	-0.426684	2.54741e-06	-0.052725	-0.134201	-0.00192722	0.127291	-0.79	-1.09928	-0.486023	3.60149e-07	0.0667406	0.00254282	0.184827	0.159871	0.41652	0.439538	WAZ	6	TRUE	6.67406	0.07
c_waz1	Glutamine	273	-0.279161	0.0335557	0.13645	0.0271929	-1.21915	-1.46781	-0.98091	0	-0.0380914	-0.0991206	0.000142877	0.141925	-1.25725	-1.50721	-1.01753	0	0.0302975	-0.000115217	0.0793911	0.144708	0.41652	0.439538	WAZ	1	FALSE	3.02975
c_waz2	Glutamine	269	-0.270211	0.0445546	0.124763	0.0462229	-0.962708	-1.2353	-0.688177	6.99729e-12	-0.0337124	-0.0933198	0.00248215	0.18413	-0.996421	-1.26776	-0.72144	1.86851e-12	0.0338335	-0.00259549	0.0970956	0.189115	0.41652	0.439538	WAZ	2	FALSE	3.38335
c_waz3	Glutamine	269	-0.295834	0.0267326	0.107081	0.0816133	-1.02458	-1.29596	-0.755373	4.59632e-14	-0.0316782	-0.0912933	0.00353325	0.190139	-1.05626	-1.3298	-0.788902	9.54792e-15	0.0299909	-0.00367968	0.0850357	0.19535	0.41652	0.439538	WAZ	3	FALSE	2.99909
c_waz5	Glutamine	258	-0.319054	0.0192171	0.0933974	0.114596	-0.887458	-1.1595	-0.611465	1.83021e-10	-0.0297988	-0.0914117	0.00503601	0.2314	-0.917257	-1.19002	-0.645226	3.97382e-11	0.0324869	-0.00582051	0.100031	0.244753	0.41652	0.440555	WAZ	5	FALSE	3.24869
c_waz11	Glutamine	255	-0.329704	0.0146609	0.0841911	0.229044	-0.791785	-1.0657	-0.511203	2.07385e-08	-0.0277581	-0.0969939	0.0148074	0.325194	-0.819543	-1.08142	-0.550654	2.86379e-09	0.0338703	-0.0182369	0.123473	0.355185	0.487791	0.508386	WAZ	11	FALSE	3.38703
c_waz4	Glutamine	267	-0.295054	0.0271918	0.0676645	0.306267	-0.954273	-1.21496	-0.69986	6.4726e-13	-0.0199647	-0.0745508	0.0167807	0.388854	-0.974238	-1.23449	-0.722416	1.40998e-13	0.0204926	-0.0168696	0.079147	0.395412	0.499955	0.508386	WAZ	4	FALSE	2.04926
c_waz7	Glutamine	204	-0.350705	0.0226937	0.0612568	0.435939	-0.711387	-1.04747	-0.368762	4.12277e-05	-0.0214831	-0.0982258	0.0307196	0.498503	-0.73287	-1.06209	-0.399045	1.71528e-05	0.0293136	-0.0429534	0.151641	0.549441	0.560816	0.618121	WAZ	7	FALSE	2.93136
c_waz9	Glutamine	156	-0.0889568	0.649369	0.0980874	0.250846	-0.971521	-1.34205	-0.623589	1.30968e-07	-0.00872555	-0.0765024	0.0373922	0.742048	-0.980247	-1.35243	-0.628747	1.27808e-07	0.00890138	-0.0411735	0.0760084	0.747166	0.742048	0.747166	WAZ	9	FALSE	0.890138
c_height6	Glutamine	222	-0.379511	0.00861574	0.176567	0.00719978	-0.676508	-0.961493	-0.385542	4.02477e-06	-0.0670092	-0.156641	-0.00889744	0.0822257	-0.743517	-1.03778	-0.438411	1.44496e-06	0.0901246	0.0132541	0.214199	0.0827586	0.333448	0.35933	Height	6	TRUE	9.01246	0.09
c_height1	Glutamine	273	-0.279161	0.0335557	0.147005	0.0113844	-0.966091	-1.23554	-0.706907	5.60885e-13	-0.0410381	-0.108135	-0.000557263	0.148161	-1.00713	-1.27534	-0.746096	4.41869e-14	0.0407476	0.000580575	0.109227	0.155858	0.333448	0.35933	Height	1	TRUE	4.07476	0.04
c_height4	Glutamine	268	-0.298278	0.0267436	0.113621	0.0610579	-0.890935	-1.16706	-0.630285	5.10336e-11	-0.0338906	-0.0977267	0.00156187	0.19646	-0.924825	-1.19359	-0.672688	6.48237e-12	0.0366454	-0.00172506	0.111484	0.212808	0.333448	0.35933	Height	4	FALSE	3.66454
c_height5	Glutamine	259	-0.322259	0.0184069	0.109553	0.0713389	-0.858896	-1.11666	-0.5902	9.83036e-11	-0.0353045	-0.101099	0.00177413	0.204024	-0.894201	-1.15394	-0.632217	1.4722e-11	0.0394816	-0.00208686	0.117321	0.217558	0.333448	0.35933	Height	5	FALSE	3.94816
c_height2	Glutamine	269	-0.270211	0.0445546	0.1242	0.0341457	-0.88562	-1.13257	-0.633382	5.96678e-12	-0.0335603	-0.100443	0.00125356	0.210924	-0.91918	-1.16949	-0.671018	5.64881e-13	0.0365111	-0.00140935	0.111238	0.222484	0.333448	0.35933	Height	2	FALSE	3.65111
c_height7	Glutamine	204	-0.350705	0.0226937	0.129696	0.100634	-0.74536	-1.03924	-0.430728	1.34707e-06	-0.0454851	-0.135775	0.0059495	0.222299	-0.790845	-1.09308	-0.474808	3.574e-07	0.0575145	-0.00729794	0.175599	0.239553	0.333448	0.35933	Height	7	FALSE	5.75145
c_height11	Glutamine	255	-0.329704	0.0146609	0.0826393	0.195746	-0.584053	-0.868157	-0.292716	8.81214e-05	-0.0272465	-0.0953854	0.00971144	0.311752	-0.611299	-0.893364	-0.318273	4.18851e-05	0.0445715	-0.0167939	0.168376	0.363866	0.375854	0.409349	Height	11	FALSE	4.45715
c_height3	Glutamine	269	-0.295834	0.0267326	0.079771	0.202707	-0.945493	-1.21144	-0.692851	2.73559e-13	-0.0235989	-0.0844275	0.00889433	0.334092	-0.969092	-1.23475	-0.725618	3.93019e-14	0.0243516	-0.00926357	0.0890182	0.344712	0.375854	0.409349	Height	3	FALSE	2.43516
c_height9	Glutamine	156	-0.0889568	0.649369	0.0975277	0.222939	-0.938731	-1.29163	-0.599246	1.16357e-07	-0.00867576	-0.0733032	0.0348373	0.731558	-0.947407	-1.31132	-0.600812	1.64417e-07	0.00915737	-0.0405015	0.0740921	0.731507	0.731558	0.731507	Height	9	FALSE	0.915737
c_weight1	Glutamine	273	-0.279161	0.0335557	0.120655	0.0386125	-1.05712	-1.28782	-0.834451	0	-0.0336822	-0.088673	0.000809896	0.153341	-1.0908	-1.32076	-0.871152	0	0.0308784	-0.000754088	0.0817133	0.156975	0.397475	0.450788	Weight	1	FALSE	3.08784
c_weight6	Glutamine	222	-0.379511	0.00861574	0.118393	0.0691526	-0.663068	-0.950754	-0.358319	9.80986e-06	-0.0449317	-0.123952	0.00243296	0.175267	-0.708	-1.00248	-0.409129	2.47631e-06	0.0634628	-0.00364698	0.191294	0.211122	0.397475	0.450788	Weight	6	FALSE	6.34628
c_weight2	Glutamine	269	-0.270211	0.0445546	0.120038	0.0547351	-0.874894	-1.11496	-0.631131	2.83995e-12	-0.0324356	-0.0917949	0.00287658	0.192453	-0.907329	-1.14912	-0.664029	4.11893e-13	0.0357484	-0.00300983	0.10581	0.200379	0.397475	0.450788	Weight	2	FALSE	3.57484
c_weight3	Glutamine	269	-0.295834	0.0267326	0.0935858	0.143164	-0.901021	-1.13983	-0.664151	3.1064e-13	-0.0276858	-0.0840298	0.00819046	0.247653	-0.928707	-1.16948	-0.693768	6.99441e-14	0.0298112	-0.00877523	0.0909383	0.251856	0.397475	0.450788	Weight	3	FALSE	2.98112
c_weight11	Glutamine	255	-0.329704	0.0146609	0.0889167	0.186013	-0.751013	-1.0118	-0.485959	1.48195e-08	-0.0293162	-0.096709	0.0112702	0.291328	-0.780329	-1.03456	-0.522887	2.89764e-09	0.037569	-0.0142111	0.12963	0.311965	0.397475	0.450788	Weight	11	FALSE	3.7569
c_weight4	Glutamine	268	-0.298278	0.0267436	0.0738268	0.228253	-0.852426	-1.10566	-0.613784	1.87479e-11	-0.0220209	-0.0749306	0.0124865	0.316952	-0.874447	-1.12569	-0.636078	5.34084e-12	0.0251827	-0.0143102	0.0856668	0.321373	0.397475	0.450788	Weight	4	FALSE	2.51827
c_weight5	Glutamine	259	-0.322259	0.0184069	0.0710554	0.249822	-0.802254	-1.06615	-0.537761	2.97317e-09	-0.0228982	-0.0789073	0.0154182	0.336633	-0.825152	-1.09226	-0.563813	1.10486e-09	0.0277503	-0.0188606	0.0993816	0.350613	0.397475	0.450788	Weight	5	FALSE	2.77503
c_weight7	Glutamine	204	-0.350705	0.0226937	0.0896488	0.256101	-0.624576	-0.933907	-0.309163	0.000106921	-0.0314403	-0.114809	0.0177435	0.353311	-0.656016	-0.963299	-0.334066	4.65498e-05	0.0479261	-0.0296411	0.193546	0.41016	0.397475	0.46143	Weight	7	FALSE	4.79261
c_weight9	Glutamine	156	-0.0889568	0.649369	0.090076	0.264775	-0.971605	-1.31433	-0.634866	2.43957e-08	-0.00801288	-0.0717821	0.0336892	0.744794	-0.979617	-1.32839	-0.637998	2.62998e-08	0.0081796	-0.0365959	0.0707845	0.74566	0.744794	0.74566	Weight	9	FALSE	0.81796
c_muac2	Glutamine	269	-0.270211	0.0445546	0.134195	0.0525807	-0.706816	-0.957797	-0.463357	2.46083e-08	-0.0362608	-0.100862	0.00348246	0.177064	-0.743077	-0.991028	-0.500121	3.92857e-09	0.0487982	-0.00517437	0.143056	0.199746	0.398751	0.574111	MUAC	2	FALSE	4.87982
c_muac6	Glutamine	222	-0.379511	0.00861574	0.112638	0.107221	-0.385299	-0.66324	-0.0941385	0.00763084	-0.0427475	-0.127122	0.00589018	0.215587	-0.428047	-0.702207	-0.144837	0.00258132	0.0998664	-0.0161693	0.421571	0.769368	0.398751	0.897596	MUAC	6	FALSE	9.98664
c_muac1	Glutamine	273	-0.279161	0.0335557	0.0952776	0.124661	-0.850757	-1.11995	-0.601766	2.11329e-10	-0.0265978	-0.0791774	0.0057219	0.238426	-0.877355	-1.14181	-0.631817	2.02018e-11	0.0303159	-0.00643592	0.0973528	0.263252	0.398751	0.574111	MUAC	1	FALSE	3.03159
c_muac3	Glutamine	269	-0.295834	0.0267326	0.09415	0.159147	-0.632417	-0.89136	-0.379489	1.04387e-06	-0.0278527	-0.0853688	0.00903183	0.253605	-0.66027	-0.917543	-0.408787	3.05667e-07	0.0421839	-0.0139254	0.138971	0.281778	0.398751	0.574111	MUAC	3	FALSE	4.21839
c_muac4	Glutamine	268	-0.298278	0.0267436	0.074726	0.24155	-0.620367	-0.881576	-0.373107	1.33876e-06	-0.0222892	-0.0760839	0.0136921	0.32337	-0.642656	-0.899037	-0.404293	3.96464e-07	0.0346828	-0.0215179	0.128245	0.359	0.398751	0.574111	MUAC	4	FALSE	3.46828
c_muac5	Glutamine	259	-0.322259	0.0184069	0.0709474	0.26329	-0.54354	-0.83007	-0.257677	0.000152191	-0.0228634	-0.0806837	0.0159983	0.341787	-0.566403	-0.849228	-0.281975	6.74887e-05	0.040366	-0.0285563	0.164369	0.41008	0.398751	0.574111	MUAC	5	FALSE	4.0366
c_muac9	Glutamine	156	-0.0889568	0.649369	0.037437	0.655177	-0.520182	-0.863157	-0.166528	0.00332245	-0.00333027	-0.0545184	0.0306979	0.868036	-0.523512	-0.862269	-0.175974	0.00286058	0.00636141	-0.0672109	0.143993	0.919023	0.868036	0.919023	MUAC	9	FALSE	0.636141
c_whz3	Glutamine	269	-0.295834	0.0267326	0.0409885	0.494084	-0.059218	-0.359713	0.232196	0.696119	-0.0121258	-0.0497061	0.0276411	0.51563	-0.0713438	-0.364859	0.219482	0.632955	0.169963	-1.56126	1.60684	0.99312	0.982334	0.999372	WHZ	3	FALSE	16.9963
c_whz11	Glutamine	255	-0.329704	0.0146609	0.04806	0.492589	-0.533314	-0.796657	-0.266933	9.62949e-05	-0.0158456	-0.0746753	0.0309822	0.532924	-0.54916	-0.811408	-0.28723	3.99532e-05	0.0288542	-0.0570282	0.157687	0.584003	0.982334	0.999372	WHZ	11	FALSE	2.88542
c_whz1	Glutamine	273	-0.279161	0.0335557	-0.0177791	0.787194	-0.339527	-0.626494	-0.0552496	0.0186845	0.00496322	-0.0325914	0.0545852	0.812722	-0.334564	-0.609564	-0.0561135	0.018051	-0.0148349	-0.245194	0.141683	0.970335	0.982334	0.999372	WHZ	1	FALSE	-1.48349
c_whz9	Glutamine	156	-0.0889568	0.649369	0.0471287	0.575185	-0.655877	-1.03234	-0.279047	0.000595629	-0.00419242	-0.0516988	0.0343281	0.833099	-0.66007	-1.03499	-0.28301	0.000519652	0.00635148	-0.0570143	0.0903167	0.930321	0.982334	0.999372	WHZ	9	FALSE	0.635148
c_whz4	Glutamine	268	-0.298278	0.0267436	-0.0100732	0.862364	-0.237563	-0.540921	0.0590477	0.11803	0.00300461	-0.032369	0.0471185	0.875662	-0.234559	-0.53279	0.0629797	0.120498	-0.0128096	-0.463008	0.365748	0.995183	0.982334	0.999372	WHZ	4	FALSE	-1.28096
c_whz5	Glutamine	258	-0.319054	0.0192171	-0.00450872	0.935728	-0.251662	-0.559053	0.0579482	0.105243	0.00143853	-0.0339225	0.0466659	0.941406	-0.250223	-0.553204	0.0576883	0.105594	-0.00574897	-0.461495	0.357989	0.997778	0.982334	0.999372	WHZ	5	FALSE	-0.574897
c_whz7	Glutamine	204	-0.350705	0.0226937	-0.00430198	0.95447	-0.26485	-0.624746	0.0825432	0.143921	0.00150873	-0.0596562	0.0594182	0.9576	-0.263341	-0.620007	0.0778385	0.13668	-0.00572916	-0.583014	0.658874	0.999012	0.982334	0.999372	WHZ	7	FALSE	-0.572916
c_whz6	Glutamine	222	-0.379511	0.00861574	0.00193336	0.977768	-0.36256	-0.693961	-0.0222855	0.0340899	-0.000733734	-0.062029	0.0507827	0.978913	-0.363293	-0.685342	-0.0375334	0.0272807	0.00201967	-0.213931	0.33258	0.996997	0.982334	0.999372	WHZ	6	FALSE	0.201967
c_whz2	Glutamine	269	-0.270211	0.0445546	0.00153181	0.98028	0.0124469	-0.291332	0.318398	0.93607	-0.000413912	-0.0337624	0.045984	0.982334	0.012033	-0.286072	0.318262	0.937597	-0.0343981	-1.57367	1.4378	0.999372	0.982334	0.999372	WHZ	2	FALSE	-3.43981
c_headc1	Glutamine	273	-0.279161	0.0335557	0.0895419	0.170336	-0.7972	-1.05197	-0.541593	6.30697e-10	-0.0249966	-0.0848631	0.00932235	0.297996	-0.822196	-1.07483	-0.568458	1.00181e-10	0.0304022	-0.0112734	0.106537	0.316083	0.757457	0.782288	HC	1	FALSE	3.04022
c_headc6	Glutamine	222	-0.379511	0.00861574	0.0616998	0.302263	-0.772028	-1.04768	-0.482739	1.0375e-07	-0.0234158	-0.0896647	0.0189376	0.389318	-0.795444	-1.08299	-0.503572	5.57959e-08	0.0294374	-0.0250492	0.11732	0.407934	0.757457	0.782288	HC	6	FALSE	2.94374
c_headc2	Glutamine	269	-0.270211	0.0445546	0.0651841	0.321537	-0.788966	-1.02538	-0.548442	1.73747e-10	-0.0176134	-0.0709317	0.0177352	0.434358	-0.806579	-1.05109	-0.570388	8.84335e-11	0.0218372	-0.0232751	0.0885055	0.442912	0.757457	0.782288	HC	2	FALSE	2.18372
c_headc5	Glutamine	259	-0.322259	0.0184069	0.0502355	0.436533	-0.744342	-0.996105	-0.491532	7.2892e-09	-0.0161888	-0.0684247	0.028372	0.49395	-0.760531	-1.01489	-0.503096	5.02136e-09	0.0212862	-0.0401036	0.0927419	0.506045	0.757457	0.782288	HC	5	FALSE	2.12862
c_headc4	Glutamine	268	-0.298278	0.0267436	0.0504112	0.431697	-0.730182	-0.982243	-0.481671	7.73413e-09	-0.0150366	-0.0687051	0.0233626	0.501898	-0.745218	-1.0012	-0.499215	4.96137e-09	0.0201774	-0.0318049	0.092608	0.505896	0.757457	0.782288	HC	4	FALSE	2.01774
c_headc3	Glutamine	269	-0.295834	0.0267326	0.0503217	0.441815	-0.697732	-0.940831	-0.44425	5.2027e-08	-0.0148869	-0.0652191	0.0255268	0.504971	-0.712619	-0.961903	-0.455323	3.20325e-08	0.0208903	-0.0385278	0.0940847	0.521525	0.757457	0.782288	HC	3	FALSE	2.08903
c_headc7	Glutamine	204	-0.350705	0.0226937	0.0259557	0.741341	-0.616839	-0.919465	-0.320053	6.10949e-05	-0.00910281	-0.0702024	0.0554327	0.762749	-0.625941	-0.918269	-0.327102	3.6743e-05	0.0145426	-0.0929497	0.118689	0.774789	0.974953	0.976292	HC	7	FALSE	1.45426
c_headc11	Glutamine	255	-0.329704	0.0146609	0.0108155	0.861479	-0.6832	-0.944456	-0.421432	2.65483e-07	-0.0035659	-0.050316	0.0421107	0.872997	-0.686766	-0.945277	-0.422969	2.00214e-07	0.00519231	-0.0665778	0.0758649	0.877593	0.974953	0.976292	HC	11	FALSE	0.519231
c_headc9	Glutamine	123	0.0150198	0.948413	0.0509608	0.584818	-0.833495	-1.22094	-0.46848	1.19718e-05	0.00076542	-0.0537255	0.0546748	0.974953	-0.83273	-1.22422	-0.473293	1.3135e-05	-0.00091917	-0.0691345	0.061989	0.976292	0.974953	0.976292	HC	9	FALSE	-0.091917
c_waz3	Serine	269	-0.294203	0.0257029	0.181196	0.000685293	-1.00295	-1.26795	-0.740091	4.26326e-14	-0.0533083	-0.117133	-0.00474376	0.0683349	-1.05626	-1.3298	-0.788902	9.54792e-15	0.050469	0.00466069	0.110062	0.0659118	0.185023	0.19689	LAZ	3	TRUE	5.0469	0.05
c_waz2	Serine	269	-0.301333	0.0206049	0.178752	0.00116029	-0.942557	-1.21184	-0.672276	1.2025e-11	-0.0538638	-0.122291	-0.00673364	0.06842	-0.996421	-1.26776	-0.72144	1.86851e-12	0.0540573	0.0070917	0.122093	0.0700207	0.185023	0.19689	LAZ	2	TRUE	5.40573	0.05
c_waz1	Serine	273	-0.275128	0.037497	0.176586	0.000640222	-1.20866	-1.45906	-0.971156	0	-0.0485839	-0.110395	-0.00152326	0.0808325	-1.25725	-1.50721	-1.01753	0	0.0386431	0.00109071	0.0886476	0.0793578	0.185023	0.19689	LAZ	1	TRUE	3.86431	0.04
c_waz5	Serine	258	-0.290554	0.0304162	0.154367	0.00377172	-0.872405	-1.1422	-0.59964	2.58761e-10	-0.044852	-0.109508	-0.00149533	0.106936	-0.917257	-1.19002	-0.645226	3.97382e-11	0.048898	0.00171418	0.121442	0.116691	0.185023	0.19689	LAZ	5	TRUE	4.8898	0.05
c_waz11	Serine	255	-0.343446	0.00994928	0.134011	0.0265035	-0.773517	-1.04355	-0.497461	2.81307e-08	-0.0460257	-0.114262	-0.00206056	0.107055	-0.819543	-1.08142	-0.550654	2.86379e-09	0.0561602	0.00262094	0.147609	0.13126	0.185023	0.19689	LAZ	11	TRUE	5.61602	0.06
c_waz4	Serine	267	-0.29377	0.0273589	0.130974	0.0218257	-0.935762	-1.19497	-0.684119	7.60503e-13	-0.0384764	-0.0967361	0.000356359	0.123349	-0.974238	-1.23449	-0.722416	1.40998e-13	0.0394938	-0.000432846	0.0996175	0.125464	0.185023	0.19689	LAZ	4	FALSE	3.94938
c_waz7	Serine	204	-0.374709	0.0112406	0.124575	0.0709614	-0.686191	-1.02308	-0.358176	5.04033e-05	-0.0466794	-0.121862	0.00481473	0.158934	-0.73287	-1.06209	-0.399045	1.71528e-05	0.0636939	-0.00617606	0.181812	0.209555	0.20104	0.240334	LAZ	7	FALSE	6.36939
c_waz6	Serine	222	-0.267401	0.0705513	0.156791	0.00829737	-0.748074	-1.05007	-0.441496	1.41124e-06	-0.0419261	-0.11569	0.00271522	0.178702	-0.79	-1.09928	-0.486023	3.60149e-07	0.053071	-0.00383076	0.155372	0.21363	0.20104	0.240334	LAZ	6	FALSE	5.3071
c_waz9	Serine	156	-0.0701823	0.712291	0.146215	0.0521028	-0.969985	-1.34074	-0.619072	1.26888e-07	-0.0102617	-0.0828479	0.0525887	0.74873	-0.980247	-1.35243	-0.628747	1.27808e-07	0.0104685	-0.0600734	0.0835693	0.758288	0.74873	0.758288	LAZ	9	FALSE	1.04685
c_waz3	Serine	269	-0.294203	0.0257029	0.181196	0.000685293	-1.00295	-1.26795	-0.740091	4.26326e-14	-0.0533083	-0.117133	-0.00474376	0.0683349	-1.05626	-1.3298	-0.788902	9.54792e-15	0.050469	0.00466069	0.110062	0.0659118	0.185023	0.19689	WAZ	3	TRUE	5.0469	0.05
c_waz2	Serine	269	-0.301333	0.0206049	0.178752	0.00116029	-0.942557	-1.21184	-0.672276	1.2025e-11	-0.0538638	-0.122291	-0.00673364	0.06842	-0.996421	-1.26776	-0.72144	1.86851e-12	0.0540573	0.0070917	0.122093	0.0700207	0.185023	0.19689	WAZ	2	TRUE	5.40573	0.05
c_waz1	Serine	273	-0.275128	0.037497	0.176586	0.000640222	-1.20866	-1.45906	-0.971156	0	-0.0485839	-0.110395	-0.00152326	0.0808325	-1.25725	-1.50721	-1.01753	0	0.0386431	0.00109071	0.0886476	0.0793578	0.185023	0.19689	WAZ	1	TRUE	3.86431	0.04
c_waz5	Serine	258	-0.290554	0.0304162	0.154367	0.00377172	-0.872405	-1.1422	-0.59964	2.58761e-10	-0.044852	-0.109508	-0.00149533	0.106936	-0.917257	-1.19002	-0.645226	3.97382e-11	0.048898	0.00171418	0.121442	0.116691	0.185023	0.19689	WAZ	5	TRUE	4.8898	0.05
c_waz11	Serine	255	-0.343446	0.00994928	0.134011	0.0265035	-0.773517	-1.04355	-0.497461	2.81307e-08	-0.0460257	-0.114262	-0.00206056	0.107055	-0.819543	-1.08142	-0.550654	2.86379e-09	0.0561602	0.00262094	0.147609	0.13126	0.185023	0.19689	WAZ	11	TRUE	5.61602	0.06
c_waz4	Serine	267	-0.29377	0.0273589	0.130974	0.0218257	-0.935762	-1.19497	-0.684119	7.60503e-13	-0.0384764	-0.0967361	0.000356359	0.123349	-0.974238	-1.23449	-0.722416	1.40998e-13	0.0394938	-0.000432846	0.0996175	0.125464	0.185023	0.19689	WAZ	4	FALSE	3.94938
c_waz7	Serine	204	-0.374709	0.0112406	0.124575	0.0709614	-0.686191	-1.02308	-0.358176	5.04033e-05	-0.0466794	-0.121862	0.00481473	0.158934	-0.73287	-1.06209	-0.399045	1.71528e-05	0.0636939	-0.00617606	0.181812	0.209555	0.20104	0.240334	WAZ	7	FALSE	6.36939
c_waz6	Serine	222	-0.267401	0.0705513	0.156791	0.00829737	-0.748074	-1.05007	-0.441496	1.41124e-06	-0.0419261	-0.11569	0.00271522	0.178702	-0.79	-1.09928	-0.486023	3.60149e-07	0.053071	-0.00383076	0.155372	0.21363	0.20104	0.240334	WAZ	6	FALSE	5.3071
c_waz9	Serine	156	-0.0701823	0.712291	0.146215	0.0521028	-0.969985	-1.34074	-0.619072	1.26888e-07	-0.0102617	-0.0828479	0.0525887	0.74873	-0.980247	-1.35243	-0.628747	1.27808e-07	0.0104685	-0.0600734	0.0835693	0.758288	0.74873	0.758288	WAZ	9	FALSE	1.04685
c_height1	Serine	273	-0.275128	0.037497	0.140545	0.011128	-0.968462	-1.23716	-0.711727	3.193e-13	-0.0386678	-0.0976237	1.00176e-05	0.131853	-1.00713	-1.27534	-0.746096	4.41869e-14	0.0383941	-1.22203e-05	0.0983596	0.13564	0.339339	0.360771	Height	1	FALSE	3.83941
c_height4	Serine	268	-0.303315	0.0212252	0.105908	0.0413114	-0.892702	-1.16406	-0.635811	3.96589e-11	-0.0321235	-0.0873617	0.000543736	0.166653	-0.924825	-1.19359	-0.672688	6.48237e-12	0.0347346	-0.000594517	0.0975487	0.18362	0.339339	0.360771	Height	4	FALSE	3.47346
c_height2	Serine	269	-0.301333	0.0206049	0.0976112	0.0608421	-0.889767	-1.1345	-0.639854	2.8948e-12	-0.0294135	-0.0846651	0.0013196	0.193195	-0.91918	-1.16949	-0.671018	5.64881e-13	0.0319997	-0.00149174	0.0945023	0.206092	0.339339	0.360771	Height	2	FALSE	3.19997
c_height5	Serine	259	-0.300825	0.0253179	0.0998548	0.0601469	-0.864162	-1.12299	-0.600652	6.09297e-11	-0.0300388	-0.084506	0.00275078	0.197578	-0.894201	-1.15394	-0.632217	1.4722e-11	0.0335929	-0.00323474	0.098316	0.210303	0.339339	0.360771	Height	5	FALSE	3.35929
c_height3	Serine	269	-0.294203	0.0257029	0.0852378	0.112171	-0.944015	-1.20723	-0.696431	1.82965e-13	-0.0250772	-0.076443	0.00570218	0.245638	-0.969092	-1.23475	-0.725618	3.93019e-14	0.025877	-0.00607901	0.0801088	0.255033	0.339339	0.360771	Height	3	FALSE	2.5877
c_height6	Serine	222	-0.267401	0.0705513	0.128059	0.0555247	-0.709274	-0.999839	-0.40608	3.14101e-06	-0.0342432	-0.106206	0.00503689	0.248955	-0.743517	-1.03778	-0.438411	1.44496e-06	0.0460557	-0.00697576	0.151069	0.274956	0.339339	0.360771	Height	6	FALSE	4.60557
c_height7	Serine	204	-0.374709	0.0112406	0.100223	0.170329	-0.753291	-1.04585	-0.438707	9.69952e-07	-0.0375547	-0.117901	0.0144406	0.26393	-0.790845	-1.09308	-0.474808	3.574e-07	0.0474867	-0.0200928	0.151833	0.2806	0.339339	0.360771	Height	7	FALSE	4.74867
c_height11	Serine	255	-0.343446	0.00994928	0.0444439	0.451839	-0.596035	-0.881704	-0.308573	6.06129e-05	-0.0152641	-0.0676383	0.0233456	0.508768	-0.611299	-0.893364	-0.318273	4.18851e-05	0.0249699	-0.0443362	0.123153	0.550922	0.572364	0.619788	Height	11	FALSE	2.49699
c_height9	Serine	156	-0.0701823	0.712291	0.119905	0.123038	-0.938992	-1.29054	-0.607565	1.10562e-07	-0.00841518	-0.0719169	0.0454809	0.760454	-0.947407	-1.31132	-0.600812	1.64417e-07	0.00888233	-0.0539503	0.0740129	0.766128	0.760454	0.766128	Height	9	FALSE	0.888233
c_weight2	Serine	269	-0.301333	0.0206049	0.169366	0.00179904	-0.856293	-1.09767	-0.613762	7.94831e-12	-0.0510357	-0.118564	-0.00621604	0.0761222	-0.907329	-1.14912	-0.664029	4.11893e-13	0.0562483	0.00721159	0.133979	0.0835845	0.199759	0.254219	Weight	2	TRUE	5.62483	0.06
c_weight3	Serine	269	-0.294203	0.0257029	0.161482	0.00326235	-0.881198	-1.11962	-0.645194	6.00409e-13	-0.0475086	-0.110353	-0.00298372	0.0903116	-0.928707	-1.16948	-0.693768	6.99441e-14	0.0511556	0.00315992	0.120108	0.0911086	0.199759	0.254219	Weight	3	TRUE	5.11556	0.05
c_weight1	Serine	273	-0.275128	0.037497	0.165921	0.00139463	-1.04515	-1.27391	-0.819078	0	-0.0456495	-0.106657	-0.00123432	0.0905239	-1.0908	-1.32076	-0.871152	0	0.0418496	0.00107007	0.0970781	0.0911536	0.199759	0.254219	Weight	1	TRUE	4.18496	0.04
c_weight4	Serine	268	-0.303315	0.0212252	0.130624	0.0171579	-0.834827	-1.08273	-0.59875	3.45439e-11	-0.0396202	-0.0959433	-0.00129424	0.108677	-0.874447	-1.12569	-0.636078	5.34084e-12	0.0453089	0.00170118	0.112708	0.112986	0.199759	0.254219	Weight	4	TRUE	4.53089	0.05
c_weight5	Serine	259	-0.300825	0.0253179	0.129336	0.0238419	-0.786245	-1.04947	-0.522133	5.59983e-09	-0.0389075	-0.103091	1.1666e-05	0.1475	-0.825152	-1.09226	-0.563813	1.10486e-09	0.0471518	-1.16638e-05	0.129725	0.16173	0.199759	0.263751	Weight	5	FALSE	4.71518
c_weight7	Serine	204	-0.374709	0.0112406	0.134147	0.0574938	-0.60575	-0.915099	-0.294009	0.000136642	-0.0502662	-0.131924	0.00238065	0.152779	-0.656016	-0.963299	-0.334066	4.65498e-05	0.0766233	-0.00386314	0.217726	0.20514	0.199759	0.263751	Weight	7	FALSE	7.66233
c_weight11	Serine	255	-0.343446	0.00994928	0.112071	0.0617545	-0.741838	-1.00109	-0.477873	2.15337e-08	-0.0384905	-0.103146	0.00182745	0.155368	-0.780329	-1.03456	-0.522887	2.89764e-09	0.049326	-0.002376	0.139546	0.176567	0.199759	0.263751	Weight	11	FALSE	4.9326
c_weight6	Serine	222	-0.267401	0.0705513	0.136948	0.0313715	-0.67138	-0.965063	-0.362986	8.22348e-06	-0.0366199	-0.110881	0.00355414	0.223605	-0.708	-1.00248	-0.409129	2.47631e-06	0.0517231	-0.00539613	0.17272	0.269361	0.251555	0.303032	Weight	6	FALSE	5.17231
c_weight9	Serine	156	-0.0701823	0.712291	0.139569	0.0576691	-0.969822	-1.32062	-0.632094	2.75541e-08	-0.00979529	-0.0816896	0.0498569	0.751628	-0.979617	-1.32839	-0.637998	2.62998e-08	0.0099991	-0.0568457	0.0824429	0.757979	0.751628	0.757979	Weight	9	FALSE	0.99991
c_muac2	Serine	269	-0.301333	0.0206049	0.211013	0.000860718	-0.679492	-0.930108	-0.438708	5.35391e-08	-0.0635852	-0.145486	-0.00813677	0.0695683	-0.743077	-0.991028	-0.500121	3.92857e-09	0.0855702	0.0111541	0.200638	0.0789633	0.169092	0.236782	MUAC	2	TRUE	8.55702	0.09
c_muac4	Serine	268	-0.303315	0.0212252	0.167248	0.00593702	-0.591928	-0.850812	-0.350987	3.10153e-06	-0.0507287	-0.116498	-0.00534468	0.0825711	-0.642656	-0.899037	-0.404293	3.96464e-07	0.078936	0.00791993	0.198008	0.109257	0.169092	0.236782	MUAC	4	TRUE	7.8936	0.08
c_muac3	Serine	269	-0.294203	0.0257029	0.182669	0.00276059	-0.606528	-0.862986	-0.359389	2.09724e-06	-0.0537417	-0.12388	-0.00402098	0.0834066	-0.66027	-0.917543	-0.408787	3.05667e-07	0.0813935	0.00685904	0.201497	0.104637	0.169092	0.236782	MUAC	3	TRUE	8.13935	0.08
c_muac5	Serine	259	-0.300825	0.0253179	0.154031	0.0123463	-0.520067	-0.802709	-0.235763	0.000247383	-0.0463364	-0.11601	-0.00139097	0.119388	-0.566403	-0.849228	-0.281975	6.74888e-05	0.0818081	0.00268808	0.235972	0.189095	0.169092	0.264734	MUAC	5	TRUE	8.18081	0.08
c_muac1	Serine	273	-0.275128	0.037497	0.153728	0.00943485	-0.83506	-1.10592	-0.585769	2.92586e-10	-0.0422949	-0.106019	-0.000512224	0.12078	-0.877355	-1.14181	-0.631817	2.02018e-11	0.0482072	0.000683281	0.126066	0.135304	0.169092	0.236782	MUAC	1	TRUE	4.82072	0.05
c_muac6	Serine	222	-0.267401	0.0705514	0.166276	0.0141651	-0.383584	-0.65431	-0.0957165	0.00721991	-0.0444623	-0.125427	0.00265664	0.18899	-0.428047	-0.702207	-0.144837	0.00258132	0.103873	-0.00875686	0.398139	0.794082	0.220488	0.865391	MUAC	6	FALSE	10.3873
c_muac9	Serine	156	-0.0701823	0.712291	0.165435	0.0312369	-0.511902	-0.84767	-0.157413	0.00384924	-0.0116106	-0.0974316	0.0498926	0.748395	-0.523512	-0.862269	-0.175974	0.00286058	0.0221783	-0.130521	0.242099	0.865391	0.748395	0.865391	MUAC	9	FALSE	2.21783
c_whz3	Serine	269	-0.294203	0.0257029	0.113758	0.0447792	-0.0378757	-0.334837	0.253551	0.800252	-0.033468	-0.0830948	0.0012624	0.132815	-0.0713438	-0.364859	0.219482	0.632955	0.46911	-3.09808	3.70448	0.987566	0.422751	0.987566	WHZ	3	FALSE	46.911
c_whz11	Serine	255	-0.343446	0.00994928	0.115583	0.0605474	-0.509463	-0.773357	-0.238403	0.000188751	-0.0396964	-0.104269	0.00180231	0.143769	-0.54916	-0.811408	-0.28723	3.99532e-05	0.0722858	-0.00362748	0.223077	0.232402	0.422751	0.987566	WHZ	11	FALSE	7.22858
c_whz2	Serine	269	-0.301333	0.0206049	0.0880029	0.144774	0.0385511	-0.263999	0.341566	0.803007	-0.0265182	-0.0778443	0.00841811	0.226887	0.012033	-0.286072	0.318262	0.937597	-2.20379	-3.41765	2.87559	0.985838	0.422751	0.987566	WHZ	2	FALSE	-220.379
c_whz7	Serine	204	-0.374709	0.0112406	0.0924216	0.187463	-0.22871	-0.585169	0.110616	0.193094	-0.0346312	-0.105375	0.0166548	0.258224	-0.263341	-0.620007	0.0778385	0.13668	0.131507	-0.679886	1.20564	0.980218	0.422751	0.987566	WHZ	7	FALSE	13.1507
c_whz5	Serine	258	-0.290554	0.0304162	0.0791223	0.158941	-0.227234	-0.53472	0.0857921	0.145321	-0.0229893	-0.0723015	0.00850285	0.268381	-0.250223	-0.553204	0.0576883	0.105594	0.0918754	-0.489966	0.785354	0.982398	0.422751	0.987566	WHZ	5	FALSE	9.18754
c_whz4	Serine	268	-0.303315	0.0212252	0.0698973	0.223152	-0.213358	-0.514179	0.0786266	0.156634	-0.0212009	-0.0650252	0.0137751	0.281834	-0.234559	-0.53279	0.0629797	0.120498	0.0903863	-0.443209	0.72874	0.968285	0.422751	0.987566	WHZ	4	FALSE	9.03863
c_whz6	Serine	222	-0.267401	0.0705514	0.0764548	0.197958	-0.342849	-0.664227	-0.0131728	0.0390917	-0.0204441	-0.0770181	0.00951404	0.359366	-0.363293	-0.685342	-0.0375335	0.0272807	0.0562744	-0.0462764	0.424608	0.894759	0.462042	0.987566	WHZ	6	FALSE	5.62744
c_whz1	Serine	273	-0.275128	0.037497	0.0529994	0.401188	-0.319982	-0.597713	-0.0392781	0.0252839	-0.0145816	-0.0616164	0.0208964	0.469165	-0.334564	-0.609564	-0.0561135	0.018051	0.0435841	-0.10022	0.284479	0.898235	0.527811	0.987566	WHZ	1	FALSE	4.35841
c_whz9	Serine	156	-0.0701823	0.712291	0.101247	0.167761	-0.652964	-1.03191	-0.273826	0.000680525	-0.00710571	-0.064102	0.0406214	0.77484	-0.66007	-1.03499	-0.28301	0.000519652	0.0107651	-0.0726388	0.121867	0.95794	0.77484	0.987566	WHZ	9	FALSE	1.07651
c_headc5	Serine	259	-0.300825	0.0253179	0.0760511	0.190395	-0.737653	-0.993086	-0.482447	1.2261e-08	-0.022878	-0.0718782	0.012876	0.286906	-0.760531	-1.01489	-0.503096	5.02136e-09	0.0300817	-0.0172388	0.0988073	0.302771	0.605135	0.644182	HC	5	FALSE	3.00817
c_headc1	Serine	273	-0.275128	0.037497	0.0760733	0.18919	-0.801266	-1.05764	-0.547902	3.90213e-10	-0.0209299	-0.0686859	0.0100772	0.293385	-0.822196	-1.07483	-0.568458	1.00181e-10	0.0254561	-0.0127505	0.0852412	0.310319	0.605135	0.644182	HC	1	FALSE	2.54561
c_headc2	Serine	269	-0.301333	0.0206049	0.0685745	0.233612	-0.785916	-1.02609	-0.545992	2.19872e-10	-0.0206638	-0.0716502	0.0129674	0.333045	-0.806579	-1.05109	-0.570388	8.84335e-11	0.025619	-0.0169801	0.0908787	0.344453	0.605135	0.644182	HC	2	FALSE	2.5619
c_headc6	Serine	222	-0.267401	0.0705513	0.0640679	0.309178	-0.778312	-1.05995	-0.490023	9.60874e-08	-0.0171318	-0.0707118	0.0158768	0.434346	-0.795444	-1.08299	-0.503572	5.5796e-08	0.0215374	-0.0202461	0.0938211	0.456786	0.605135	0.644182	HC	6	FALSE	2.15374
c_headc3	Serine	269	-0.294203	0.0257029	0.0528345	0.36785	-0.697075	-0.940668	-0.44489	5.18077e-08	-0.0155441	-0.0607809	0.0187143	0.436312	-0.712619	-0.961903	-0.455323	3.20325e-08	0.0218126	-0.0281829	0.0891697	0.455889	0.605135	0.644182	HC	3	FALSE	2.18126
c_headc4	Serine	268	-0.303315	0.0212252	0.0531304	0.37349	-0.729103	-0.984291	-0.478961	1.11374e-08	-0.0161153	-0.0634577	0.0190506	0.437672	-0.745218	-1.0012	-0.499215	4.96138e-09	0.0216249	-0.0281049	0.0856974	0.446836	0.605135	0.644182	HC	4	FALSE	2.16249
c_headc7	Serine	204	-0.374709	0.0112406	0.0589716	0.43497	-0.603844	-0.91003	-0.309694	8.72134e-05	-0.0220972	-0.0861019	0.0395707	0.470661	-0.625941	-0.918269	-0.327102	3.6743e-05	0.0353024	-0.065746	0.148854	0.50103	0.605135	0.644182	HC	7	FALSE	3.53024
c_headc11	Serine	255	-0.343446	0.00994928	0.0271962	0.659836	-0.677426	-0.941741	-0.413017	4.12499e-07	-0.00934042	-0.0574753	0.0379349	0.683295	-0.686766	-0.945277	-0.422969	2.00214e-07	0.0136006	-0.0551699	0.0892781	0.697598	0.768706	0.784798	HC	11	FALSE	1.36006
c_headc9	Serine	123	-0.0134695	0.952307	0.093239	0.298141	-0.831474	-1.21866	-0.478942	8.89041e-06	-0.00125588	-0.0569965	0.0669736	0.964971	-0.83273	-1.22422	-0.473293	1.3135e-05	0.00150815	-0.0915145	0.0634459	0.966951	0.964971	0.966951	HC	9	FALSE	0.150815
